# Supplementary material for: RNA Sequencing of Tumor-Educated Platelets Reveals a Three-Gene Diagnostic Signature in Esophageal Squamous Cell Carcinoma
Source: Front Oncol. 2022 May 9;12:824354. doi: 10.3389/fonc.2022.824354 (PMC9124963; doi:10.3389/fonc.2022.824354)
Supplement: Supplementary file 3 [file DataSheet_3.xlsx]

## Sheet: Sheet1
Gene	HD1	HD2	HD3	HD4	HD5	HD6	HD7	HD8	HD9	HD10	HD11	HD12	HD13	HD14	HD15	HD16	HD17	HD18	HD19	HD20	HD21	HD22	HD23	HD24	HD25	HD26	HD27	HD28	HD29	HD30	HD31	HD32	HD33	HD34	HD35	HD36	HD37	HD38	HD39	HD40	HD41	HD42	HD43	HD44	HD45	HD46	HD47	HD48	HD49
ENSG00000000003	0	0	9	0	0	0	0	0	8	8	0	3	0	8	0	5	0	1	0	14	0	0	0	0	0	0	1	3	0	0	5	0	0	0	0	0	0	0	0	0	5	0	0	4	0	0	0	4	0
ENSG00000000005	0	0	0	0	0	0	0	0	0	0	0	0	0	0	0	0	0	0	0	0	0	0	0	0	0	0	0	0	0	0	0	0	0	0	0	0	0	0	0	0	0	0	0	0	0	0	0	0	0
ENSG00000000419	100	27	22	25	2	42	47	0	88	6	146	128	32	129	7	5	12	131	34	184	214	0	75	0	17	139	0	100	94	190	22	2	10	16	18	16	12	16	8	6	11	4	95	14	11	33	49	83	4
ENSG00000000457	6	3	2	30	4	2	0	0	1	8	39	64	7	132	0	9	3	41	0	97	70	17	23	0	0	0	52	17	0	12	25	0	0	3	0	0	19	3	5	0	0	0	16	0	5	11	13	16	1
ENSG00000000460	11	13	2	2	23	14	12	1	0	49	60	52	10	95	6	49	8	56	26	168	44	4	6	4	10	1	25	21	0	27	4	4	9	6	5	4	13	2	10	7	25	2	14	12	2	17	19	24	0
ENSG00000000938	159	171	29	38	26	150	293	37	110	70	173	974	81	506	30	12	70	195	74	1393	1108	196	32	36	94	319	123	132	72	337	82	11	26	33	28	16	38	7	25	23	11	9	224	20	16	21	233	280	27
ENSG00000000971	2	0	0	0	6	22	0	0	0	0	6	1	0	6	0	0	0	11	0	45	17	0	0	0	0	56	0	0	0	0	0	5	0	0	0	0	0	0	0	0	0	0	2	2	1	0	7	15	0
ENSG00000001036	79	21	30	14	22	99	108	75	117	59	44	70	38	55	14	13	13	43	10	114	77	109	109	109	68	103	148	124	68	126	31	8	14	9	0	7	11	5	16	12	18	7	20	12	12	3	34	24	8
ENSG00000001084	26	0	1	7	0	7	9	0	1	0	1	30	14	12	4	0	0	1	0	35	34	0	0	0	0	0	0	0	0	1	21	2	0	0	0	1	0	7	0	9	0	4	3	4	1	0	4	8	2
ENSG00000001167	10	5	0	0	0	0	8	1	0	6	25	48	10	55	5	1	4	2	7	48	30	0	0	0	0	1	29	0	0	7	9	10	0	0	10	4	0	3	1	1	12	1	0	8	5	2	11	8	1
ENSG00000001460	4	1	0	3	0	1	3	1	0	0	1	8	6	0	0	0	1	2	0	20	23	0	0	0	26	0	34	1	0	1	0	0	0	0	0	2	0	0	0	0	0	0	1	0	0	0	6	4	0
ENSG00000001461	19	34	26	6	30	19	16	14	19	56	60	144	99	257	27	32	28	74	39	185	194	47	7	59	31	39	47	66	66	65	53	16	13	7	31	5	22	7	26	3	22	21	37	34	24	17	43	32	16
ENSG00000001497	26	17	4	9	1	13	25	1	8	6	41	151	19	125	2	1	30	28	68	122	169	0	1	0	7	0	21	11	25	93	14	6	10	7	1	6	6	0	1	10	9	6	31	14	1	24	27	22	1
ENSG00000001561	8	5	0	9	0	2	1	0	1	1	14	35	4	13	0	2	0	4	5	40	26	0	0	0	0	11	0	0	0	8	2	2	7	0	0	2	2	1	0	0	0	1	7	6	0	1	5	6	0
ENSG00000001617	0	0	0	0	0	0	0	0	0	0	0	0	0	0	1	0	0	0	0	0	0	0	0	0	0	0	0	0	0	0	0	0	0	0	0	0	0	0	0	0	0	0	0	0	0	0	0	0	0
ENSG00000001626	0	0	0	0	0	0	0	0	0	0	0	0	0	0	0	0	0	0	0	0	0	0	0	0	0	0	0	0	0	0	0	0	0	0	0	0	0	0	0	0	0	0	0	0	0	0	0	0	0
ENSG00000001629	39	40	32	46	9	23	22	54	53	27	55	42	47	36	13	15	45	52	49	136	55	15	0	0	29	39	6	19	37	23	25	23	16	24	5	13	2	12	15	3	6	13	5	17	5	18	28	19	16
ENSG00000001630	0	0	0	0	0	0	0	0	0	0	0	0	0	0	0	0	0	0	0	0	0	0	0	0	0	0	0	0	0	0	0	0	0	0	0	0	0	0	0	0	0	0	0	0	0	0	0	0	0
ENSG00000001631	20	30	18	6	14	15	8	65	3	44	163	30	81	188	34	17	33	136	138	222	212	32	25	41	7	0	77	79	0	59	24	24	25	6	9	16	37	8	25	19	9	39	78	62	22	27	46	45	33
ENSG00000002016	6	12	0	0	0	1	0	0	0	0	5	4	0	10	0	1	0	0	16	21	25	0	0	0	0	8	0	3	0	6	0	0	3	1	0	1	1	0	0	0	0	0	6	3	0	1	7	9	1
ENSG00000002079	0	0	1	0	0	0	0	0	0	0	0	0	0	0	0	0	0	0	0	0	0	0	0	0	0	0	0	0	0	0	0	0	0	0	0	0	0	0	0	0	0	0	0	0	0	0	0	0	0
ENSG00000002330	13	2	2	17	21	32	41	18	10	14	8	4	12	19	4	1	4	8	10	16	4	50	23	36	10	23	93	88	53	51	2	3	6	4	1	2	1	1	1	9	5	3	12	10	1	1	6	4	3
ENSG00000002549	99	73	25	34	9	166	179	40	102	81	135	327	107	293	50	80	53	158	64	536	686	0	73	21	120	102	142	119	1	190	43	19	29	12	27	27	10	9	24	52	28	16	99	20	15	45	93	110	27
ENSG00000002586	2632	776	1016	1105	1563	3189	4925	6757	1905	3104	4152	4902	3906	3124	893	1799	3694	2853	3464	2856	3882	11325	7007	8918	6192	8815	8280	6245	5425	13850	1015	1050	1296	903	999	972	1590	1012	2024	834	1863	944	2383	2551	1075	1971	991	1267	755
ENSG00000002587	1	2	0	2	1	1	4	0	0	0	0	1	0	0	0	0	0	0	0	0	0	0	0	0	0	5	0	0	0	0	0	0	0	0	0	0	0	0	0	0	0	0	2	0	0	0	1	0	0
ENSG00000002726	0	0	0	0	0	0	1	0	0	0	0	0	0	0	0	0	0	0	0	0	0	0	0	0	0	0	0	0	0	0	0	0	0	0	0	0	0	0	0	0	0	0	0	0	0	0	0	0	0
ENSG00000002745	0	0	0	1	0	4	0	0	0	0	1	4	0	0	0	0	2	4	2	15	4	0	0	0	0	0	0	0	0	0	0	0	0	0	0	0	0	0	0	1	0	1	1	0	0	0	0	0	0
ENSG00000002746	0	0	0	0	0	0	0	0	0	0	0	0	0	0	0	0	0	0	0	0	0	0	0	0	0	0	0	0	0	0	0	0	0	0	0	0	0	0	0	0	0	0	0	0	0	0	0	0	0
ENSG00000002822	47	16	0	20	14	22	47	45	31	3	52	17	4	117	11	4	7	54	15	138	55	15	49	39	0	48	7	94	0	89	12	6	4	11	0	11	2	2	4	6	1	7	28	14	3	19	28	34	8
ENSG00000002834	8	8	14	3	3	6	4	3	3	43	34	78	39	84	7	10	42	20	21	132	67	3	7	0	17	11	22	18	16	16	6	6	5	6	3	3	2	3	4	6	7	1	22	18	6	12	8	23	5
ENSG00000002919	1	7	8	0	0	8	10	1	20	9	12	45	0	19	1	4	16	20	4	59	54	0	0	4	0	42	0	54	25	4	1	0	0	0	1	1	1	4	1	0	0	1	21	2	0	0	19	19	4
ENSG00000002933	11	10	0	11	2	233	33	0	49	0	0	34	0	37	0	0	0	0	3	50	3	0	0	0	1	39	0	0	0	56	1	1	0	11	0	3	0	1	0	3	0	0	14	0	0	2	5	3	4
ENSG00000003056	152	91	104	32	14	57	83	77	35	178	251	450	178	513	44	103	87	225	217	851	884	103	13	76	53	142	241	123	111	307	71	38	37	17	14	25	13	26	60	15	50	24	166	33	22	60	182	200	30
ENSG00000003096	0	0	0	0	0	0	1	0	1	8	10	0	9	0	0	7	7	0	23	17	5	0	6	0	0	0	0	0	0	1	0	0	9	0	0	1	0	0	2	0	0	0	8	3	0	0	0	4	1
ENSG00000003137	0	0	0	0	0	0	0	0	0	0	0	0	0	0	0	0	0	0	0	0	0	0	0	0	0	0	0	0	0	0	0	0	0	0	0	0	0	0	0	0	0	0	0	0	0	0	0	0	0
ENSG00000003147	13	4	0	16	6	6	7	29	0	2	3	16	9	18	2	22	10	4	19	3	14	0	0	0	0	6	0	1	3	1	2	0	0	0	3	3	0	0	5	5	0	2	3	1	6	0	2	1	4
ENSG00000003249	0	0	0	0	0	1	0	0	0	0	0	1	1	3	0	0	0	1	0	2	0	0	0	1	0	1	0	4	0	1	0	0	0	0	0	0	0	0	0	0	0	0	0	0	0	0	2	0	0
ENSG00000003393	1	3	27	0	0	7	2	0	0	0	8	73	1	97	1	15	2	32	56	31	25	0	0	0	0	0	0	0	0	1	0	2	8	4	0	4	5	7	0	1	1	1	7	5	0	3	7	11	4
ENSG00000003400	26	9	0	8	9	8	2	4	6	1	12	36	4	30	9	2	2	17	16	35	80	0	0	0	0	15	1	5	3	1	9	0	8	5	3	3	2	1	4	6	4	1	8	1	0	9	10	14	6
ENSG00000003402	112	44	89	90	42	99	81	108	31	167	273	288	139	313	37	38	71	220	215	284	291	112	75	49	65	133	160	143	80	185	63	59	65	30	40	25	49	33	46	46	53	41	126	56	32	66	91	81	50
ENSG00000003436	365	228	267	437	322	546	408	1214	643	1216	1051	941	1033	654	269	267	375	1132	570	496	742	692	629	742	398	1219	1350	1014	1089	652	253	172	200	129	85	158	163	164	231	116	186	101	319	208	99	211	264	137	206
ENSG00000003509	10	0	7	1	0	0	3	0	35	0	24	56	0	50	3	0	0	0	16	82	42	0	0	0	0	0	0	0	0	39	2	0	3	2	0	0	0	3	0	0	0	1	4	0	0	7	10	6	0
ENSG00000003756	76	28	29	28	18	22	20	68	24	21	211	412	68	444	30	18	26	234	192	671	655	10	0	16	15	189	1	3	19	96	42	19	34	13	8	30	64	16	9	13	22	37	128	20	15	26	111	141	15
ENSG00000003987	0	0	0	0	0	0	0	0	0	0	0	0	0	0	0	0	0	0	0	0	0	0	0	0	0	0	0	0	0	0	0	0	0	0	0	0	0	0	0	0	0	0	0	0	0	0	0	0	0
ENSG00000003989	0	0	0	0	0	0	0	0	0	0	0	0	0	0	0	0	0	0	0	0	0	0	0	0	0	0	0	0	0	0	0	0	0	0	0	0	0	0	0	0	0	0	0	0	0	0	0	0	0
ENSG00000004059	185	58	71	71	86	431	492	353	73	303	187	254	245	323	128	120	179	121	173	340	310	518	619	475	435	584	927	1044	915	960	63	42	44	44	52	38	77	31	152	53	63	74	194	194	52	61	102	70	38
ENSG00000004139	1	0	0	0	0	0	0	0	0	0	5	1	0	3	1	0	0	0	0	8	4	0	0	0	0	0	0	1	0	0	0	0	0	0	0	0	0	0	0	0	0	0	0	1	0	0	2	1	0
ENSG00000004142	12	1	3	14	12	37	26	2	60	13	27	51	9	43	8	4	4	19	39	102	43	0	54	0	0	0	40	75	40	83	6	3	2	4	0	7	2	4	3	11	1	10	16	1	5	9	26	12	9
ENSG00000004399	5	2	18	1	2	4	4	3	3	0	2	7	3	1	0	0	0	4	15	0	8	0	0	0	0	0	0	0	0	0	1	0	1	3	0	0	1	0	0	2	0	2	5	9	5	1	15	3	2
ENSG00000004455	57	23	5	17	26	47	65	15	115	13	48	127	34	118	12	15	15	29	68	125	186	16	39	65	10	95	42	29	77	91	16	12	6	9	12	2	2	5	5	7	13	0	50	12	1	9	67	38	5
ENSG00000004468	38	0	0	0	7	10	16	11	172	0	31	166	22	50	3	0	0	22	0	54	87	0	31	0	0	0	38	0	0	1	12	0	1	5	0	4	1	0	0	6	0	4	16	7	2	7	20	17	3
ENSG00000004478	9	7	1	6	1	8	34	0	38	7	38	14	1	48	0	0	0	10	0	90	13	17	0	4	0	0	0	0	17	46	15	6	1	10	1	1	0	4	0	2	2	1	13	2	0	6	12	15	1
ENSG00000004487	30	11	6	14	23	28	12	16	3	32	38	32	11	27	4	0	28	2	31	90	64	0	9	1	1	2	27	2	1	20	3	12	7	9	2	9	11	6	5	3	0	7	39	9	19	13	16	21	2
ENSG00000004534	116	82	146	91	22	97	105	2	92	19	400	693	199	685	86	65	88	903	508	1638	1296	0	0	0	0	91	6	50	16	49	61	101	196	67	112	101	77	54	111	140	64	129	359	118	73	202	285	320	85
ENSG00000004660	1	0	0	0	0	0	4	0	0	0	0	0	0	8	0	0	0	0	0	0	8	0	0	0	0	0	1	0	0	0	0	1	0	0	1	1	1	0	0	1	0	0	3	0	3	0	5	0	2
ENSG00000004700	24	81	41	14	18	15	23	44	74	162	423	561	68	476	62	188	72	122	93	979	631	77	60	21	38	31	72	77	63	134	76	3	48	20	16	15	45	42	54	22	18	10	97	73	26	16	91	101	29
ENSG00000004766	10	2	41	0	0	12	2	13	2	0	75	51	21	190	1	23	7	19	0	84	108	0	0	0	0	12	16	21	23	39	3	20	1	1	4	13	12	24	0	6	10	1	44	9	15	20	20	42	24
ENSG00000004776	0	0	0	0	0	4	0	0	0	0	0	0	1	0	0	0	0	0	0	0	0	0	0	0	0	0	0	0	0	0	0	0	1	0	0	0	0	0	0	0	0	0	0	0	0	1	0	0	0
ENSG00000004777	1	0	0	0	0	0	0	0	0	0	0	0	0	0	0	0	0	0	0	0	0	0	0	0	0	0	0	0	0	0	0	0	0	0	0	0	0	0	0	0	0	0	0	0	1	0	0	1	0
ENSG00000004779	180	38	19	81	57	82	77	56	225	24	162	217	48	236	11	6	16	167	81	270	320	54	35	38	47	258	121	102	61	99	43	27	62	20	17	21	9	25	22	29	30	33	116	16	14	55	177	97	18
ENSG00000004799	0	0	0	0	0	2	1	0	0	1	12	5	0	28	0	0	4	0	0	130	19	0	0	0	0	35	0	0	0	0	0	0	5	2	4	1	0	1	0	0	1	1	2	0	1	0	6	8	0
ENSG00000004809	1	0	0	0	0	1	0	0	4	0	2	0	0	3	0	0	0	0	0	35	0	0	0	0	0	0	0	0	0	0	0	0	0	0	0	0	0	0	0	0	0	0	1	0	0	0	3	3	0
ENSG00000004838	0	0	0	0	0	0	0	0	0	0	0	0	0	1	3	0	0	0	0	7	2	0	0	0	0	0	0	0	0	0	0	0	1	0	0	0	0	0	0	3	0	0	2	2	0	0	0	2	0
ENSG00000004846	0	0	0	0	0	0	0	0	2	10	0	0	0	0	0	0	3	0	0	6	0	0	6	0	0	0	0	0	0	0	2	0	0	1	0	0	0	0	0	0	0	0	0	0	0	0	0	0	0
ENSG00000004848	0	0	0	0	0	0	0	0	0	0	0	0	0	0	0	0	0	0	0	0	0	0	0	0	0	0	0	0	0	0	0	0	0	0	0	0	0	0	0	0	0	0	0	0	0	0	0	0	0
ENSG00000004864	31	14	0	5	9	22	10	0	1	4	10	33	11	32	2	10	1	10	0	34	93	0	0	1	0	5	0	0	0	15	5	3	2	3	2	5	4	3	0	11	0	4	5	1	0	7	17	9	6
ENSG00000004866	63	90	122	16	50	135	183	176	181	593	461	309	271	319	102	203	240	451	260	234	366	469	263	369	117	196	313	193	81	332	72	62	69	52	54	58	95	40	47	25	128	30	109	82	55	74	50	78	57
ENSG00000004897	157	101	148	168	112	221	146	345	177	499	311	251	321	305	92	150	144	354	210	265	356	371	177	270	277	263	161	198	312	251	95	103	66	67	48	68	49	58	68	44	79	74	80	77	54	106	100	78	68
ENSG00000004939	2	1	1	4	0	13	9	1	0	0	9	0	2	16	7	2	8	5	2	8	196	0	0	0	0	7	0	0	0	1	4	3	7	0	5	1	0	2	0	17	2	8	19	2	1	8	3	5	18
ENSG00000004948	0	0	0	0	0	0	0	0	0	0	0	0	0	0	0	0	0	0	0	0	0	0	0	0	0	0	0	0	0	0	0	0	0	0	0	0	1	0	0	0	0	0	0	0	0	0	0	0	0
ENSG00000004961	52	13	14	33	4	35	37	0	54	0	26	21	3	39	0	4	5	30	0	97	71	10	0	10	15	5	53	7	11	47	2	0	4	12	0	0	5	2	0	0	2	4	29	4	0	4	22	22	4
ENSG00000004975	2	5	0	0	0	1	1	0	0	0	0	3	0	0	0	0	0	0	0	8	0	0	0	0	0	0	0	0	1	1	0	0	3	4	0	1	0	1	1	1	1	0	0	3	1	0	4	4	2
ENSG00000005001	0	0	0	0	0	0	0	0	0	0	0	0	0	0	0	0	0	0	0	0	0	0	0	0	0	0	0	0	2	0	0	0	0	0	0	0	0	0	0	0	0	0	0	0	0	0	0	0	0
ENSG00000005007	0	13	4	1	2	3	8	6	6	1	2	7	17	17	2	4	1	12	14	7	2	1	26	0	1	2	1	3	1	0	0	9	1	3	1	0	1	2	0	1	6	10	13	4	3	0	7	2	5
ENSG00000005020	301	1073	1490	421	334	593	583	897	633	5228	5183	3864	5435	3355	1314	2623	2307	3095	4558	3078	4027	4348	2988	2812	2037	3642	4668	3759	2947	3963	1139	652	755	513	516	326	621	384	629	504	846	483	1163	1342	500	682	475	522	512
ENSG00000005022	226	93	60	81	76	105	133	132	107	226	252	462	150	373	49	63	81	221	194	582	760	127	86	110	67	207	172	151	135	408	69	11	39	15	20	22	34	19	37	16	43	25	135	20	17	41	170	129	24
ENSG00000005059	75	14	15	33	17	83	72	3	115	0	100	67	21	285	18	10	18	116	62	271	95	0	7	13	0	19	97	8	48	110	17	14	63	15	2	16	4	8	19	11	16	13	54	21	16	35	69	118	8
ENSG00000005073	0	0	0	0	0	0	0	0	0	0	0	0	0	0	0	0	0	0	0	0	0	0	0	0	0	0	0	0	0	0	0	0	0	0	0	0	0	0	0	0	0	0	0	0	0	0	0	0	0
ENSG00000005075	40	15	16	10	21	30	58	27	27	37	50	65	15	83	12	11	21	47	48	48	87	16	22	13	17	113	61	30	30	68	19	7	21	13	22	16	15	7	21	13	11	16	39	23	5	8	41	28	8
ENSG00000005100	3	3	0	0	0	0	1	0	0	1	1	0	0	1	0	0	0	10	0	11	4	0	0	0	0	0	0	0	0	0	2	0	2	0	1	1	0	0	0	0	0	2	0	1	0	1	2	1	0
ENSG00000005102	1	0	0	0	0	0	0	0	0	0	0	3	0	0	0	0	0	0	0	0	1	0	0	0	0	0	0	0	1	0	0	0	0	0	0	0	0	0	1	0	0	0	0	0	0	0	0	0	0
ENSG00000005108	0	0	0	0	0	0	0	0	0	0	0	0	0	0	0	0	0	12	0	0	7	0	0	0	0	0	0	0	0	0	1	0	0	0	0	0	0	0	0	0	0	0	0	0	0	0	0	0	0
ENSG00000005156	7	1	0	2	1	3	8	38	0	0	4	50	4	72	2	0	6	39	1	87	131	0	0	0	0	0	11	24	7	5	0	4	2	2	0	0	5	0	0	2	3	6	22	7	2	3	3	20	3
ENSG00000005175	144	55	166	99	72	79	77	66	130	356	292	357	151	392	52	72	123	308	178	497	378	224	224	195	59	222	199	113	180	77	75	26	45	32	75	92	91	27	26	11	58	34	107	74	17	66	135	77	70
ENSG00000005187	2	14	2	7	3	5	5	22	0	4	36	67	19	24	55	9	13	89	11	6	54	67	0	0	0	94	21	0	0	0	14	4	5	0	15	5	0	11	2	0	0	0	10	0	2	1	20	12	1
ENSG00000005189	7	11	0	0	0	0	4	0	0	39	25	33	2	0	0	17	38	42	115	28	3	65	0	41	0	19	145	22	43	33	6	6	7	2	1	4	36	9	0	9	0	1	5	9	7	14	1	14	0
ENSG00000005194	65	13	25	26	18	32	58	13	119	34	95	241	37	153	32	38	22	102	19	159	276	46	10	124	5	76	72	120	123	121	16	4	27	0	23	6	19	1	11	9	23	10	51	16	4	27	51	63	5
ENSG00000005206	4	0	0	5	1	5	10	10	3	0	0	8	0	13	5	0	1	12	20	16	3	0	0	0	0	4	0	1	0	0	0	5	4	5	0	0	0	0	3	0	0	5	13	1	2	3	5	1	6
ENSG00000005238	1	17	7	4	3	12	7	12	8	26	25	20	21	35	14	13	27	8	44	19	29	11	3	32	0	76	85	60	88	34	7	9	13	10	8	2	1	1	5	10	3	6	7	1	5	5	3	5	11
ENSG00000005243	0	0	0	0	0	0	2	0	0	0	2	8	0	0	0	0	0	4	0	0	2	0	0	0	0	0	0	40	0	0	0	0	0	0	0	0	0	0	0	0	0	0	0	0	0	0	0	0	0
ENSG00000005249	398	337	636	484	718	1108	944	850	463	2499	2078	1166	2128	968	665	1112	1112	1257	1561	868	1072	958	657	666	614	700	1161	1113	701	984	484	444	399	401	320	338	400	270	473	257	444	371	393	834	384	378	123	206	347
ENSG00000005302	45	29	60	39	5	49	40	5	39	22	127	337	48	295	38	19	11	241	75	450	369	55	1	0	22	43	22	35	17	77	42	26	59	21	14	26	16	27	21	24	41	29	112	19	16	50	101	78	17
ENSG00000005339	83	27	123	22	16	91	84	8	31	37	86	107	22	105	42	46	36	265	122	121	153	0	1	1	1	14	3	5	22	1	48	43	81	35	26	42	26	22	23	25	22	61	80	48	38	59	76	48	68
ENSG00000005379	5	3	0	0	0	1	2	1	0	1	0	1	0	4	0	0	0	3	3	6	5	13	0	0	0	1	0	0	0	0	0	0	0	0	0	1	0	0	1	2	1	0	5	2	0	0	1	3	0
ENSG00000005381	3	0	0	0	9	1	6	0	0	0	0	0	0	0	0	0	3	0	0	11	20	0	0	0	0	9	0	0	0	4	0	0	0	0	0	0	0	0	0	0	0	1	4	0	2	0	1	0	0
ENSG00000005421	0	0	0	0	0	0	0	0	0	0	0	0	0	0	0	0	0	0	0	0	0	0	0	0	0	0	0	0	0	0	0	1	0	0	0	0	0	0	0	0	0	0	0	0	0	0	0	0	2
ENSG00000005436	8	12	0	2	0	3	0	26	0	0	13	22	0	16	0	0	0	1	4	70	40	0	0	0	40	0	0	0	13	0	12	2	9	0	1	3	4	6	3	0	0	0	10	4	1	2	16	13	0
ENSG00000005448	20	7	14	0	1	9	19	1	90	1	10	33	14	97	0	1	2	21	20	80	72	0	0	0	0	0	0	2	0	50	2	10	14	0	5	4	1	1	0	7	3	11	20	0	1	11	17	10	1
ENSG00000005469	3	8	0	0	0	1	0	0	0	9	17	80	5	51	3	7	0	14	3	63	38	4	0	39	0	0	17	0	0	14	8	2	7	0	4	5	1	3	1	0	1	4	8	0	3	10	7	10	2
ENSG00000005471	16	0	4	27	2	2	6	0	0	0	3	38	20	0	0	0	1	5	42	39	19	0	0	0	0	0	0	0	0	0	3	2	1	1	0	0	0	0	1	4	2	1	4	0	0	0	4	1	4
ENSG00000005483	832	290	357	455	205	516	479	289	818	668	982	1447	584	1517	281	385	412	1454	880	1722	1619	673	398	684	412	1156	769	701	521	1296	301	248	303	217	158	187	145	118	162	168	177	202	583	281	169	326	562	442	284
ENSG00000005486	27	8	10	7	17	30	71	56	37	66	58	81	20	57	12	5	29	64	36	67	82	51	98	17	55	51	86	71	74	163	22	2	13	3	10	2	6	2	9	0	8	6	22	10	1	9	22	26	10
ENSG00000005513	0	0	0	0	0	1	0	0	0	0	0	0	0	0	0	0	0	0	0	0	0	0	0	0	0	0	0	0	0	0	0	0	0	0	0	0	0	0	0	0	0	0	0	0	0	0	0	0	0
ENSG00000005700	18	9	37	35	9	6	27	5	9	5	109	283	45	272	17	12	16	115	61	279	279	25	0	5	0	0	48	0	0	57	52	8	24	10	18	28	5	7	10	16	14	26	70	22	28	29	67	50	8
ENSG00000005801	9	4	2	6	1	6	1	11	22	0	15	41	0	43	0	0	7	31	21	53	28	5	0	14	0	24	18	28	5	11	3	5	0	1	1	7	0	0	1	5	1	6	12	0	1	1	12	9	0
ENSG00000005810	151	108	196	150	87	128	103	87	93	431	613	494	481	1045	101	170	158	715	471	849	732	141	116	102	143	301	257	155	69	147	142	115	210	91	65	70	85	81	86	87	93	88	213	162	65	196	209	166	129
ENSG00000005812	3	3	2	0	1	47	2	1	0	5	1	22	4	30	1	1	8	0	11	46	27	1	1	0	12	4	0	2	0	4	4	1	0	4	1	0	0	0	1	1	0	3	4	1	2	1	3	16	0
ENSG00000005844	33	43	72	11	8	10	19	4	17	6	154	577	41	574	22	11	27	228	153	994	1092	0	0	1	0	20	35	32	20	7	54	27	49	42	4	9	27	11	14	13	6	27	165	33	15	57	125	137	32
ENSG00000005882	18	40	86	33	10	32	84	36	21	82	98	155	68	246	40	46	31	71	74	145	214	64	100	16	29	147	206	177	204	96	22	7	10	2	3	15	4	20	14	3	5	12	32	29	7	5	13	30	18
ENSG00000005884	0	0	0	0	0	0	1	0	0	0	1	0	0	0	0	0	0	0	0	0	0	0	0	0	0	0	0	0	0	0	0	0	0	1	0	0	0	0	0	0	0	0	0	0	0	0	0	0	0
ENSG00000005889	44	3	21	19	8	10	20	41	21	6	10	61	11	87	1	6	5	88	20	122	74	0	0	0	0	81	44	0	7	18	9	15	13	10	13	6	4	6	10	5	1	19	25	7	5	10	32	29	13
ENSG00000005893	226	185	158	175	129	301	245	421	120	318	243	501	286	513	57	135	147	168	49	747	842	438	301	75	244	517	427	233	286	245	157	73	33	8	13	31	30	27	54	14	49	34	151	99	21	45	96	147	59
ENSG00000005955	291	18	61	106	75	130	97	24	178	30	113	227	68	245	17	7	61	181	175	264	267	43	21	36	0	59	79	23	112	247	35	49	78	23	26	42	24	41	36	45	58	75	113	54	33	90	91	98	49
ENSG00000005961	701	2555	3110	870	1417	3830	4161	6074	807	13211	9312	7181	14798	9622	2181	4983	8553	3846	9721	9971	8714	9751	6202	6588	4233	8826	12465	12162	8893	10991	2781	1309	1468	1040	990	728	1846	696	3028	780	1313	1303	2824	3456	1894	1251	371	1147	942
ENSG00000005981	0	0	0	0	0	0	0	0	0	0	0	0	0	0	0	0	0	0	0	0	0	0	0	0	0	0	0	0	0	0	0	0	0	0	0	0	0	0	0	0	0	0	0	0	0	0	0	0	0
ENSG00000006007	22	44	56	14	9	66	53	37	37	155	150	145	224	163	55	84	84	73	50	205	122	422	183	220	161	246	452	241	250	236	41	19	22	9	9	15	13	16	45	8	35	24	41	78	12	35	27	55	14
ENSG00000006015	13	0	1	12	11	27	27	1	12	2	4	12	2	19	7	2	6	13	7	20	4	14	12	7	6	22	61	64	39	48	5	2	13	7	0	15	4	2	12	7	1	13	24	7	11	9	28	17	1
ENSG00000006016	0	0	0	0	0	0	0	0	0	0	0	0	0	0	0	0	0	0	0	0	0	0	0	0	0	0	0	0	0	0	0	0	0	0	0	0	0	0	0	0	0	0	0	0	0	0	0	0	0
ENSG00000006025	6	0	0	0	0	2	1	0	1	0	0	24	11	9	3	1	2	18	3	28	39	0	0	0	0	0	0	0	0	0	0	10	11	1	0	2	2	0	4	9	3	9	7	0	0	8	12	20	0
ENSG00000006042	0	0	2	0	3	1	1	0	0	0	0	0	0	0	3	0	0	0	0	0	0	0	0	0	0	0	0	1	0	0	0	0	0	0	1	0	0	2	0	0	0	0	1	0	1	0	1	0	1
ENSG00000006047	0	0	0	0	0	0	0	0	0	0	0	0	0	0	0	0	0	0	0	0	0	0	0	0	0	0	0	0	0	0	0	0	0	0	0	0	0	0	0	0	0	0	0	1	1	0	0	0	0
ENSG00000006059	0	0	0	0	0	0	0	0	0	0	0	0	0	0	0	0	0	0	0	0	0	0	0	0	0	0	0	0	0	0	0	0	0	0	0	0	0	0	0	0	0	0	0	0	0	0	0	0	0
ENSG00000006062	1	9	4	2	0	2	2	0	0	0	6	22	1	75	5	2	0	30	1	116	65	0	0	0	0	0	3	10	0	2	9	4	0	0	1	0	0	0	1	2	0	2	5	4	0	1	8	6	2
ENSG00000006071	2	0	0	0	0	0	0	0	0	0	0	0	0	0	0	0	0	0	0	0	0	0	0	0	0	0	0	0	0	0	0	0	0	1	0	0	0	0	0	0	0	0	0	0	0	0	0	0	0
ENSG00000006074	0	0	0	0	0	0	0	0	0	2	0	0	0	0	2	0	0	6	0	0	0	0	1	0	0	0	3	0	0	0	0	0	0	0	0	0	0	0	0	0	0	0	0	0	0	0	0	0	0
ENSG00000006075	15	1	3	2	0	2	7	4	1	2	1	14	3	9	1	0	0	17	4	8	46	4	0	1	0	6	1	18	0	6	1	0	1	1	0	2	0	0	6	0	0	1	1	1	0	2	1	2	0
ENSG00000006114	18	11	15	11	12	20	18	4	23	16	43	104	40	195	39	11	14	31	79	247	93	0	1	0	5	56	13	60	0	23	20	16	28	6	8	18	23	8	11	16	7	21	41	32	11	28	57	52	19
ENSG00000006116	0	0	0	0	0	0	0	0	0	0	0	0	0	0	0	0	0	0	0	0	0	0	0	0	0	0	0	0	0	0	0	0	0	0	0	0	0	0	0	0	0	0	0	0	0	0	0	0	0
ENSG00000006118	0	0	0	0	0	0	0	0	0	0	0	0	0	0	0	0	0	0	0	0	0	0	0	0	0	0	0	0	0	0	0	0	0	0	0	0	0	0	0	0	0	0	0	0	0	0	0	0	0
ENSG00000006125	41	68	120	17	47	97	74	30	21	331	492	590	343	452	179	210	301	414	378	442	579	121	105	35	113	106	216	106	77	168	167	73	136	94	108	81	97	63	95	60	115	102	131	221	118	127	73	93	77
ENSG00000006128	0	0	0	0	0	0	0	0	0	0	0	0	0	0	0	0	0	0	0	0	0	0	0	0	0	0	0	0	0	0	0	0	0	0	0	0	0	0	0	0	0	0	0	0	0	0	0	0	0
ENSG00000006194	1	0	0	0	0	0	1	0	0	0	0	1	0	12	0	0	0	0	0	8	1	1	0	0	0	0	0	0	0	3	0	0	0	0	0	0	0	0	4	2	0	1	0	1	0	0	1	1	0
ENSG00000006210	0	0	0	0	0	0	0	0	0	0	0	0	0	0	0	0	0	0	0	0	0	0	0	0	0	0	0	0	0	0	0	0	0	0	0	0	0	0	0	0	0	0	0	0	0	0	0	0	0
ENSG00000006282	7	1	1	0	9	3	12	0	0	0	12	20	4	10	5	0	1	29	23	40	89	0	0	0	0	22	0	37	0	44	0	0	2	1	1	4	5	2	0	4	0	4	8	2	3	4	17	2	4
ENSG00000006283	0	0	0	0	0	0	0	0	0	0	0	0	0	0	0	0	0	0	0	0	0	0	0	0	0	0	0	0	0	0	0	0	0	0	0	0	0	0	0	0	0	0	0	0	0	0	0	0	0
ENSG00000006327	5	0	0	0	0	4	2	0	6	0	0	0	0	0	0	0	0	0	0	0	3	0	0	0	0	0	0	0	0	0	0	0	0	0	0	0	0	0	0	0	0	0	0	0	0	0	1	0	0
ENSG00000006377	0	0	0	0	0	0	0	0	0	0	0	0	0	0	0	0	0	0	0	0	0	0	0	0	0	0	0	0	0	0	0	0	0	0	0	0	0	0	0	0	0	0	0	0	0	0	0	1	0
ENSG00000006432	0	0	0	0	0	0	0	0	0	0	0	1	0	0	0	0	0	2	0	0	0	0	0	0	0	0	0	0	0	0	4	0	0	0	0	0	0	0	0	0	0	0	0	0	0	0	0	0	0
ENSG00000006451	42	3	17	11	14	42	33	23	120	10	19	30	4	61	4	5	9	32	11	50	48	0	10	0	0	32	86	106	96	35	0	12	18	1	8	13	1	7	2	10	6	7	25	1	0	21	23	19	11
ENSG00000006453	0	0	0	0	0	2	0	0	0	0	0	0	0	0	0	0	0	0	0	4	0	0	0	0	0	0	0	0	0	0	0	0	0	0	0	0	0	0	0	0	0	0	0	0	0	0	0	0	0
ENSG00000006459	53	34	28	71	15	24	9	71	6	20	74	53	75	63	33	43	14	116	85	25	20	1	0	47	0	94	72	0	66	9	20	30	24	41	22	20	28	2	21	24	17	32	31	22	15	38	16	8	47
ENSG00000006468	0	0	0	0	0	0	0	0	0	0	0	0	0	0	0	0	0	0	0	18	0	0	0	0	0	0	0	0	0	0	0	0	0	0	0	0	0	0	0	0	0	0	0	0	1	0	0	1	0
ENSG00000006530	6	2	13	12	5	1	0	1	13	11	29	113	18	87	20	0	1	6	3	115	94	0	0	0	0	4	0	6	0	25	7	4	12	8	0	4	9	7	8	1	7	5	46	3	0	8	27	31	3
ENSG00000006534	3	4	0	0	1	11	5	0	3	0	3	14	0	24	1	1	1	0	1	77	61	16	0	0	0	3	1	0	17	20	3	0	0	1	4	0	0	2	0	3	0	1	6	0	2	0	9	5	0
ENSG00000006555	0	0	0	0	0	0	0	0	2	0	0	0	0	4	0	0	0	0	0	0	0	0	0	0	0	0	0	0	0	0	0	0	0	0	0	0	0	0	0	0	0	0	1	0	0	0	0	0	0
ENSG00000006576	53	50	99	32	34	79	52	44	3	353	230	233	136	303	38	126	103	142	117	329	290	99	122	42	6	98	159	161	155	81	94	14	38	47	36	20	24	17	30	15	64	14	67	73	27	61	50	59	23
ENSG00000006606	0	0	0	0	0	0	0	0	0	0	0	0	0	0	0	0	0	0	0	0	0	0	0	0	0	0	0	0	0	0	0	0	0	0	0	0	0	0	0	0	0	0	0	0	0	0	0	0	0
ENSG00000006607	2	3	6	1	2	0	14	0	0	2	1	12	0	1	9	0	1	7	19	17	10	4	0	10	0	0	0	0	0	7	13	0	3	2	0	4	0	3	2	0	0	1	0	0	0	3	16	9	1
ENSG00000006611	0	0	0	0	0	0	0	0	0	0	0	0	0	0	0	0	0	0	0	0	0	0	0	0	0	0	0	0	0	0	0	0	0	0	0	0	0	0	0	0	0	0	0	0	0	0	0	0	0
ENSG00000006625	55	1	0	4	10	37	22	25	61	9	25	45	3	43	0	7	2	29	5	43	58	26	6	17	31	0	4	19	11	43	2	9	1	4	7	4	7	0	2	4	4	3	17	1	5	6	20	22	8
ENSG00000006634	59	0	2	9	13	18	21	18	151	5	12	91	5	70	9	3	7	69	17	82	104	0	7	0	0	28	94	2	57	29	26	1	22	7	1	14	9	6	19	0	2	6	14	12	2	10	34	26	6
ENSG00000006638	1	4	3	3	10	5	8	3	3	13	8	7	10	5	5	10	5	1	14	4	8	3	2	2	13	6	18	27	10	12	0	2	3	5	8	0	2	2	9	1	4	3	8	1	4	2	4	5	2
ENSG00000006652	96	292	375	254	119	213	144	296	226	1890	1628	1023	1178	1077	451	606	525	1874	1185	911	1073	1291	753	888	562	1062	1486	1462	1652	857	259	165	104	193	113	98	223	131	169	98	286	132	457	242	106	175	281	122	235
ENSG00000006659	0	0	0	0	0	0	0	0	0	0	0	1	0	0	0	0	0	0	0	0	0	0	0	0	0	0	0	0	0	0	0	0	0	0	0	0	0	0	0	0	0	0	0	0	0	0	0	0	0
ENSG00000006695	13	2	3	0	4	5	4	2	0	0	0	14	0	26	2	0	6	26	2	70	46	0	0	0	0	9	4	1	5	5	4	4	1	0	0	0	4	9	2	5	0	5	8	0	2	6	7	22	3
ENSG00000006704	0	1	0	0	0	0	0	0	0	0	0	0	0	0	0	0	0	0	7	1	0	0	0	0	0	0	0	0	0	0	1	0	0	2	0	0	0	0	0	0	0	0	0	0	0	0	0	0	1
ENSG00000006712	25	24	7	22	18	38	32	2	25	21	71	115	45	212	2	4	1	29	56	156	162	30	37	1	30	55	43	43	52	85	17	15	18	27	7	12	25	7	0	5	23	5	65	18	5	14	48	75	10
ENSG00000006715	199	187	239	69	191	129	179	138	171	676	640	627	639	699	181	390	302	351	607	586	879	281	201	215	68	247	481	349	217	277	180	90	130	79	46	70	73	72	152	40	80	54	192	250	86	75	73	117	84
ENSG00000006740	0	0	0	0	0	0	0	0	0	0	0	0	0	0	0	0	0	0	0	0	0	0	0	0	0	0	0	0	0	0	0	0	0	1	0	0	0	0	0	0	0	0	0	0	0	0	0	0	0
ENSG00000006744	14	0	0	2	1	10	5	4	61	15	47	10	19	130	14	17	3	21	23	199	53	0	0	1	0	21	94	43	21	27	0	0	12	10	7	0	1	10	2	8	2	4	12	2	10	4	35	18	1
ENSG00000006747	0	0	0	1	0	0	0	0	0	0	0	0	0	0	0	0	0	0	0	0	0	0	0	0	0	0	0	0	0	0	0	0	0	0	0	0	0	0	6	0	0	0	0	0	0	0	0	1	0
ENSG00000006756	1	0	7	1	0	0	1	0	0	6	0	0	0	11	0	0	0	10	0	5	0	0	0	0	0	4	0	0	0	0	0	0	0	0	0	1	0	0	0	0	0	0	0	0	0	0	4	0	0
ENSG00000006757	15	9	6	0	0	0	13	10	30	3	10	39	8	8	0	3	1	7	0	35	28	0	0	0	0	13	12	0	0	23	0	5	0	0	0	4	0	1	0	0	0	0	0	4	1	0	5	4	2
ENSG00000006788	0	0	0	0	0	0	0	0	0	0	0	0	0	0	0	0	1	0	0	0	0	0	0	0	0	0	0	0	0	0	1	0	0	0	0	0	0	0	0	0	0	0	1	0	0	1	0	0	0
ENSG00000006831	52	17	9	0	29	23	41	11	11	35	31	42	24	55	11	18	16	39	50	37	39	25	13	49	20	26	51	3	43	1	8	4	10	6	6	4	0	3	5	7	8	4	25	13	9	8	4	17	7
ENSG00000006837	0	0	0	0	0	0	0	0	0	0	0	0	0	1	0	0	0	0	0	0	0	0	1	0	0	0	0	0	0	0	0	0	0	0	0	0	0	0	0	0	0	0	0	0	0	1	0	0	0
ENSG00000007001	0	0	0	6	0	0	1	2	0	0	1	0	0	0	0	0	0	0	0	0	0	0	0	0	0	0	0	0	0	0	0	0	0	0	0	0	0	0	0	0	0	1	0	0	0	0	0	0	0
ENSG00000007038	1	0	0	0	0	5	1	0	0	0	1	0	0	6	0	0	0	0	0	0	5	0	0	0	0	0	0	0	0	0	2	0	0	0	0	0	0	0	0	0	0	0	0	0	0	0	2	5	0
ENSG00000007047	1	0	0	0	0	1	2	0	0	0	2	2	0	1	0	4	2	0	4	10	0	1	0	2	0	1	0	0	0	0	0	6	0	0	0	0	0	0	5	0	3	0	3	0	0	0	1	2	1
ENSG00000007062	0	0	0	0	0	0	0	0	0	0	0	0	0	0	1	0	0	0	0	0	0	0	0	0	0	0	0	0	0	0	0	0	0	0	0	0	0	0	0	0	0	0	0	0	0	0	0	0	0
ENSG00000007080	48	1	1	23	18	49	68	21	58	6	6	16	4	53	2	1	8	1	7	56	25	15	0	14	9	8	76	16	36	41	0	2	1	4	0	4	5	0	2	7	0	7	29	8	4	9	34	20	5
ENSG00000007129	13	8	0	2	9	0	9	14	0	4	7	43	6	37	0	0	3	25	14	62	35	0	0	0	0	0	0	0	19	14	0	6	4	2	1	5	0	1	0	0	0	1	11	4	1	10	12	4	1
ENSG00000007168	53	39	27	49	48	70	27	51	29	158	136	133	130	136	74	31	30	205	67	124	302	19	50	3	8	118	96	52	2	116	47	17	44	32	22	34	34	8	29	6	28	26	60	39	23	31	61	38	25
ENSG00000007171	0	0	0	0	0	0	0	0	0	0	0	0	0	0	0	0	0	0	0	0	0	0	0	0	0	0	0	0	0	0	0	0	0	0	0	0	0	0	0	0	0	0	0	0	0	0	0	0	0
ENSG00000007174	1	0	0	0	2	0	0	0	0	0	0	0	0	0	0	0	0	0	0	0	0	0	0	0	0	0	0	0	0	0	0	0	0	0	1	0	0	0	0	0	0	0	0	0	0	0	0	0	0
ENSG00000007202	40	13	11	33	0	24	29	3	44	7	21	85	12	70	26	10	17	21	59	97	86	0	0	4	0	2	0	0	1	12	11	15	13	5	17	13	22	3	10	13	14	21	33	18	3	21	32	31	13
ENSG00000007216	0	0	0	0	0	0	0	0	0	0	0	0	0	0	0	0	0	0	0	0	0	0	0	0	0	0	0	0	0	0	0	0	0	0	0	0	0	0	0	0	0	0	0	0	0	0	0	0	0
ENSG00000007237	20	3	1	20	2	5	29	0	0	0	7	23	0	16	2	0	0	12	10	32	89	0	0	0	0	0	0	0	0	0	1	0	4	0	2	2	3	0	7	8	2	5	16	1	1	3	10	11	5
ENSG00000007255	48	5	12	18	28	56	90	31	11	26	49	85	32	114	6	8	14	21	28	110	83	11	35	63	25	69	19	66	10	88	7	3	22	17	3	7	11	1	8	0	19	11	34	14	11	20	64	57	7
ENSG00000007264	6	0	5	4	9	7	10	15	3	0	0	5	0	13	12	3	0	0	0	38	1	10	1	1	0	25	44	0	15	3	0	2	0	0	0	0	0	4	5	0	2	2	4	3	2	2	6	2	3
ENSG00000007306	0	0	0	0	0	0	0	0	0	0	0	0	0	0	0	0	0	0	0	0	0	0	0	0	0	0	0	0	0	0	0	0	0	0	0	0	0	0	0	0	0	0	0	0	0	0	0	0	0
ENSG00000007312	143	67	46	196	122	136	220	91	95	0	92	296	37	221	18	14	14	139	126	355	336	0	0	34	0	183	51	137	0	514	18	11	7	7	12	11	6	13	3	38	14	9	113	16	7	17	115	88	22
ENSG00000007314	0	0	0	0	0	0	0	0	0	0	3	1	0	0	0	0	0	0	0	0	0	0	0	0	0	0	0	0	0	1	0	0	0	0	0	0	0	0	0	0	0	0	0	0	0	0	0	0	0
ENSG00000007341	22	6	12	15	10	11	19	113	49	19	29	40	24	72	20	0	20	35	7	47	31	3	51	10	49	61	4	55	24	66	1	23	18	1	3	12	14	0	2	6	11	2	0	5	1	7	3	9	21
ENSG00000007350	2	3	0	0	2	0	2	1	12	15	24	53	10	33	16	4	8	29	0	58	39	1	0	0	0	0	0	7	0	23	10	0	0	1	0	0	3	0	6	0	0	0	3	5	1	3	5	0	3
ENSG00000007372	0	0	0	0	0	0	0	0	0	0	0	0	0	0	0	0	0	0	0	0	0	0	0	0	0	0	0	0	0	0	0	0	0	0	0	0	0	0	0	0	0	0	0	0	0	0	0	0	0
ENSG00000007376	0	0	0	0	0	0	2	0	1	0	0	0	0	1	0	1	0	0	0	5	0	0	0	0	0	0	0	0	0	3	0	0	0	0	0	0	0	0	0	0	0	0	2	0	0	0	0	0	0
ENSG00000007384	0	0	0	0	0	0	0	0	0	0	0	0	0	0	0	0	0	0	0	0	0	0	0	0	0	0	0	0	0	0	0	0	0	0	0	0	0	0	0	0	0	0	0	0	0	0	0	0	0
ENSG00000007392	40	24	18	41	11	58	42	22	21	14	59	75	30	120	21	26	7	114	114	192	131	21	0	1	0	1	11	44	0	73	20	28	18	11	7	19	17	39	11	24	12	48	60	16	11	31	73	66	37
ENSG00000007402	0	0	0	0	0	1	0	0	0	0	0	4	0	0	0	0	0	0	0	0	0	0	0	0	0	0	0	0	0	0	0	0	5	0	2	0	0	0	0	0	0	0	1	0	0	2	1	2	4
ENSG00000007516	0	0	0	0	0	0	0	0	0	0	0	0	0	0	0	0	0	0	0	0	0	0	0	0	0	0	0	0	0	0	0	0	0	0	0	0	0	0	0	0	0	0	0	0	0	0	1	0	0
ENSG00000007520	0	0	0	0	2	2	0	0	0	0	1	3	1	4	0	0	0	3	0	3	2	0	0	0	0	0	0	0	0	0	2	1	4	1	0	0	0	1	1	1	0	1	9	1	1	5	3	0	0
ENSG00000007541	1	0	0	0	1	0	5	0	0	0	3	2	0	4	1	0	0	0	0	9	3	0	0	0	0	0	0	0	12	0	0	1	0	0	0	1	0	0	0	0	0	1	2	0	1	0	0	0	0
ENSG00000007545	0	0	0	0	0	0	0	0	1	0	0	1	0	0	0	0	0	0	0	0	0	0	0	0	0	0	0	0	0	0	0	0	0	0	0	1	0	0	0	0	0	0	0	0	0	0	0	0	1
ENSG00000007866	0	0	0	0	0	0	0	0	0	0	0	0	0	0	0	0	0	0	0	0	0	0	0	0	0	0	0	0	0	0	0	0	0	0	0	0	0	0	0	0	0	0	0	0	0	1	0	0	0
ENSG00000007908	0	0	0	0	0	2	0	0	0	0	0	0	0	0	0	0	0	0	0	0	0	0	0	0	0	0	0	0	0	0	0	0	1	0	0	0	0	0	0	0	0	0	0	0	0	0	0	0	0
ENSG00000007923	5	13	2	5	0	2	1	0	0	0	27	60	25	80	0	0	13	60	6	42	123	0	0	0	29	93	0	3	0	17	11	4	8	3	0	0	4	5	1	6	0	3	29	1	4	4	21	19	2
ENSG00000007933	0	0	0	0	0	0	0	0	0	0	0	0	0	0	0	0	0	0	0	0	0	0	0	0	0	0	0	0	0	0	0	0	0	0	0	0	0	0	0	0	0	0	0	0	0	0	0	0	0
ENSG00000007944	26	0	1	9	12	24	12	14	7	25	21	15	10	15	1	10	1	70	51	18	23	0	0	0	0	5	0	0	2	58	3	1	3	2	2	6	8	7	3	5	9	3	11	5	0	15	25	10	6
ENSG00000007952	0	0	1	0	0	0	0	0	0	0	0	0	0	0	0	0	0	0	0	0	0	0	0	0	0	0	0	0	0	0	0	0	0	0	0	0	0	0	0	0	0	0	0	0	0	0	0	0	0
ENSG00000007968	0	0	0	0	0	2	0	0	0	0	3	2	0	10	1	0	0	0	0	0	3	0	0	0	0	0	0	0	0	0	0	0	0	0	1	0	0	0	0	0	0	0	0	1	0	0	0	0	1
ENSG00000008018	534	72	49	89	115	301	290	259	424	97	212	532	86	479	42	38	72	230	125	575	691	186	89	76	160	427	229	122	164	532	69	28	122	29	28	21	47	18	24	28	12	30	202	53	21	64	209	175	22
ENSG00000008056	0	1	0	0	0	0	0	0	0	0	0	0	0	0	0	0	0	0	0	0	0	0	0	0	0	0	0	0	0	0	0	0	0	0	0	0	0	0	0	0	0	0	0	0	0	0	0	0	0
ENSG00000008083	51	54	63	63	39	82	85	55	36	269	152	271	226	219	70	187	82	163	225	148	267	52	86	53	53	94	199	166	129	116	63	50	81	45	40	50	51	47	71	22	46	55	95	79	55	60	27	44	56
ENSG00000008086	3	10	6	11	4	3	8	0	0	10	15	20	30	26	0	8	7	22	51	13	24	26	3	0	0	12	46	0	0	15	0	3	0	1	1	2	1	4	2	1	3	1	3	1	4	10	7	6	9
ENSG00000008118	0	0	0	0	0	0	0	0	0	0	0	0	0	0	0	0	0	0	0	0	0	0	0	0	0	0	0	0	0	0	0	0	0	0	0	0	0	0	0	0	0	0	0	0	0	0	0	0	0
ENSG00000008128	0	0	2	0	0	0	0	0	0	0	0	0	0	0	1	0	0	0	0	0	1	0	0	0	0	0	0	0	0	0	0	0	1	1	0	0	0	0	0	0	0	0	0	0	0	0	0	2	0
ENSG00000008130	32	60	8	8	3	30	46	13	35	17	49	205	1	124	0	2	8	58	23	321	325	6	0	11	33	27	31	4	3	69	9	10	3	14	0	3	13	7	19	15	0	2	42	17	8	10	69	71	14
ENSG00000008196	0	0	0	0	0	0	0	0	0	0	0	0	0	0	0	0	0	0	0	0	0	0	0	0	0	0	0	0	0	0	0	0	0	0	0	0	0	0	0	0	0	0	0	0	0	0	0	0	0
ENSG00000008197	0	0	0	0	0	0	0	0	0	0	0	0	0	0	0	0	0	0	0	0	0	0	0	0	0	0	0	0	0	0	0	0	0	0	0	0	0	0	0	0	0	0	0	0	0	0	0	0	0
ENSG00000008226	0	0	0	0	0	0	0	0	0	0	0	0	0	4	2	1	0	0	24	3	10	0	0	0	0	0	0	0	0	0	0	0	0	0	0	0	0	1	1	0	0	0	1	0	0	0	0	2	0
ENSG00000008256	0	0	0	0	0	1	0	0	0	0	0	3	0	0	0	0	0	0	0	2	0	0	0	0	0	0	0	0	0	1	1	0	0	0	0	0	0	0	0	0	0	0	0	0	0	1	0	0	1
ENSG00000008277	0	0	1	0	1	0	3	1	0	0	3	3	0	0	0	0	1	0	0	1	0	0	0	0	0	0	2	0	0	0	0	0	4	0	1	0	0	0	0	0	0	0	0	0	1	0	0	2	1
ENSG00000008282	36	35	21	17	20	17	29	0	4	39	119	145	38	172	0	29	7	128	56	344	271	19	28	38	9	102	75	7	22	155	23	7	20	14	6	2	12	3	9	11	16	6	53	7	6	15	63	83	6
ENSG00000008283	0	0	0	0	0	5	0	0	0	0	0	2	1	10	0	0	1	4	0	4	0	0	0	0	3	5	0	10	7	11	1	0	0	0	0	2	0	0	0	0	0	0	0	1	0	8	1	3	0
ENSG00000008294	39	15	16	28	11	27	16	10	59	2	35	23	10	49	4	1	8	20	19	90	21	33	0	1	0	5	2	1	1	5	15	5	37	9	44	15	17	4	10	9	9	17	13	18	7	10	11	14	48
ENSG00000008300	0	0	0	0	0	0	0	0	0	0	0	0	0	0	0	0	3	0	0	6	0	0	0	0	0	0	0	0	0	0	0	0	0	0	0	0	0	0	0	1	0	0	0	0	0	0	0	0	0
ENSG00000008311	0	0	20	0	0	0	0	0	0	13	16	22	35	6	0	0	0	1	0	120	43	0	0	0	0	0	5	0	0	0	9	0	1	0	0	0	0	0	0	0	0	2	5	11	0	1	3	4	0
ENSG00000008323	0	0	0	0	0	0	0	0	0	0	0	0	0	0	1	0	0	0	0	0	0	0	0	0	0	0	0	0	0	0	0	0	0	0	0	0	0	0	0	0	0	0	0	1	0	0	0	0	0
ENSG00000008324	37	9	1	27	3	23	25	31	38	8	26	56	2	39	4	0	3	36	11	45	43	9	5	5	2	20	10	15	13	71	7	5	9	7	2	8	7	5	7	1	9	3	28	15	3	26	42	17	0
ENSG00000008382	1	3	1	0	5	8	4	1	3	0	1	2	2	5	2	0	0	3	15	7	1	0	0	0	10	0	0	0	0	0	0	4	1	1	1	2	0	4	1	1	0	0	8	0	3	0	4	2	2
ENSG00000008394	61	15	4	5	3	16	36	22	22	0	9	21	0	32	1	1	3	0	8	50	69	0	19	8	0	15	0	0	1	15	8	2	0	0	0	3	0	2	0	2	0	4	11	2	0	1	22	20	0
ENSG00000008405	1	3	14	0	0	1	1	0	32	15	65	181	9	83	16	21	15	153	41	209	164	8	0	7	9	0	10	0	0	20	15	0	5	8	0	4	7	0	11	1	9	0	55	23	3	9	36	59	9
ENSG00000008438	10	0	0	19	0	2	4	2	0	0	1	1	1	0	0	0	0	0	0	5	1	0	0	0	0	2	0	5	0	7	4	0	1	0	0	1	0	0	0	0	0	0	3	0	0	0	1	0	0
ENSG00000008441	3	3	1	0	6	9	7	0	0	2	0	1	0	0	0	1	0	2	0	3	13	1	0	0	0	0	10	0	0	9	1	3	0	2	4	0	2	4	1	3	1	5	2	2	1	1	3	0	6
ENSG00000008513	15	9	39	11	22	40	23	5	6	85	83	175	88	201	29	32	73	100	92	187	226	53	12	59	49	159	92	102	79	140	26	16	20	11	3	9	12	2	33	13	6	13	47	11	15	29	28	53	17
ENSG00000008516	3	0	0	0	0	0	0	0	0	0	0	0	0	0	0	0	0	0	0	0	0	0	0	0	0	0	0	0	0	0	0	0	0	0	0	1	0	1	0	1	0	0	1	0	0	0	0	0	0
ENSG00000008517	173	47	58	82	89	219	123	311	476	38	413	382	69	498	52	35	52	288	153	563	511	85	88	30	74	128	182	205	71	460	40	108	194	78	25	62	94	79	55	44	87	89	304	139	30	198	430	282	27
ENSG00000008710	0	0	0	0	1	2	1	0	0	0	0	1	0	7	0	0	0	0	1	0	5	0	0	0	0	0	0	0	0	0	0	0	0	2	0	0	0	0	0	0	0	0	0	0	0	0	0	1	0
ENSG00000008735	0	0	0	0	0	0	0	0	0	0	0	0	0	0	0	0	0	0	0	0	0	0	0	0	0	0	0	0	0	0	0	0	0	0	0	0	0	0	0	0	0	0	0	0	0	0	0	0	0
ENSG00000008838	15	0	0	6	0	6	9	0	1	20	9	23	1	51	9	0	10	37	39	47	89	1	0	9	0	0	0	42	0	8	14	0	12	4	1	4	4	1	5	2	0	20	34	9	1	9	15	18	0
ENSG00000008853	1	0	0	1	0	2	0	0	0	0	4	0	0	0	2	4	0	5	3	3	0	0	0	0	0	8	0	0	0	0	0	0	0	0	1	0	0	0	0	0	0	0	2	1	1	0	0	6	1
ENSG00000008869	4	66	61	19	9	8	4	1	6	12	191	277	26	310	16	10	59	273	62	548	359	0	9	0	0	0	0	2	3	2	37	17	56	22	19	24	8	26	14	12	16	25	71	20	5	34	49	52	26
ENSG00000008952	323	119	92	214	117	232	192	192	480	200	418	512	270	549	97	59	161	605	381	499	489	142	190	158	243	218	487	291	148	501	94	128	184	111	62	157	138	97	148	148	147	196	320	207	93	201	313	259	143
ENSG00000008988	1640	649	659	851	715	1305	1370	1373	1971	664	2719	2628	946	3947	386	329	456	3603	2187	2995	3140	497	553	596	426	1397	1364	1251	792	3267	641	451	936	354	339	548	505	429	402	472	451	663	1863	669	391	827	1663	1162	276
ENSG00000009307	218	897	894	101	95	223	269	285	119	2360	3168	4003	2951	5873	986	1680	1534	1883	1958	6052	6296	435	355	489	358	803	726	971	544	717	849	278	467	149	213	167	321	304	456	172	477	310	1114	712	444	449	739	1120	375
ENSG00000009335	8	20	2	2	12	8	6	9	8	17	5	46	16	85	5	2	13	44	45	77	54	0	1	0	0	14	11	9	10	11	1	3	3	2	8	4	0	12	13	3	7	13	25	7	3	7	19	8	1
ENSG00000009413	23	21	27	22	1	28	15	2	1	7	43	41	3	53	14	8	20	17	32	91	116	0	0	1	1	72	1	7	1	25	22	10	13	9	10	3	15	10	13	14	9	16	30	2	5	31	20	36	18
ENSG00000009694	3	1	0	2	0	0	0	1	0	0	1	6	2	0	0	1	0	10	1	8	2	0	0	0	0	0	0	0	0	0	0	1	0	1	0	0	0	1	1	0	0	0	0	0	1	0	1	1	0
ENSG00000009709	0	0	0	0	0	0	0	0	0	0	0	0	0	0	0	0	0	0	0	0	0	0	0	0	0	0	0	0	0	0	0	0	0	0	0	0	0	0	0	0	0	0	0	0	0	0	0	0	0
ENSG00000009724	0	0	0	0	0	0	0	0	0	0	0	0	0	0	0	0	0	0	0	0	0	0	0	0	0	0	0	0	0	0	0	0	0	0	0	0	0	0	0	0	0	0	0	0	0	0	0	0	0
ENSG00000009765	0	1	1	0	0	0	0	0	0	0	0	0	0	0	0	0	0	0	0	0	0	0	0	0	0	0	0	0	0	0	0	0	0	0	0	2	0	0	1	0	0	0	1	0	0	0	0	1	0
ENSG00000009780	2	0	1	3	0	4	2	0	1	0	0	10	0	11	2	0	0	1	0	1	14	0	0	0	0	0	0	0	1	3	5	4	0	3	0	2	2	1	0	0	3	1	6	0	1	3	3	7	2
ENSG00000009790	517	158	105	340	135	154	292	278	1075	73	627	1260	138	1694	114	59	98	993	567	2220	2204	162	88	155	0	572	224	248	380	1310	136	116	209	108	70	113	50	82	124	81	39	81	564	92	57	188	602	457	64
ENSG00000009830	0	0	1	0	0	2	0	0	3	0	0	3	0	0	0	0	0	0	0	1	0	0	0	0	0	0	0	0	0	0	0	0	0	0	0	1	1	0	3	1	0	0	2	0	1	0	2	1	2
ENSG00000009844	62	55	35	7	7	42	37	5	195	165	174	327	96	313	36	35	50	268	109	362	431	13	16	32	16	26	125	24	121	167	46	16	37	31	16	21	20	20	23	10	25	14	58	53	24	25	88	72	19
ENSG00000009950	0	0	0	0	0	0	0	0	0	0	0	0	0	0	0	0	0	0	0	0	0	0	0	0	0	0	0	0	0	0	0	0	0	0	0	0	0	0	0	0	0	0	0	0	0	0	0	0	0
ENSG00000009954	24	9	16	44	6	14	16	1	11	9	41	42	8	19	4	2	8	14	9	29	57	1	0	1	0	2	5	1	2	0	15	25	14	10	12	10	14	9	14	6	2	11	18	11	11	18	32	24	14
ENSG00000010017	29	24	8	14	18	38	21	6	5	28	32	72	62	61	13	23	47	60	18	53	49	17	34	78	68	51	38	78	54	19	10	10	0	13	29	15	21	4	22	2	9	10	31	43	9	29	12	31	6
ENSG00000010030	0	0	0	0	0	0	0	0	0	0	0	0	0	5	0	0	0	0	0	4	12	0	0	0	0	0	0	0	0	0	0	8	0	0	0	0	0	0	0	0	0	0	2	3	0	0	0	0	0
ENSG00000010072	7	5	2	0	2	0	4	2	0	1	4	24	0	23	7	0	0	0	1	38	8	10	0	0	0	9	11	18	0	2	2	0	4	3	2	3	1	6	1	2	0	2	3	5	1	5	7	7	3
ENSG00000010165	4	0	0	0	1	4	7	0	0	0	19	36	4	37	0	6	4	11	5	60	39	18	0	5	0	6	0	5	0	16	1	2	5	2	0	6	2	1	1	0	0	2	20	1	4	5	9	10	0
ENSG00000010219	25	7	6	18	6	15	10	8	15	6	26	32	9	18	1	3	8	20	36	31	50	0	6	0	0	47	11	5	2	25	8	0	2	0	0	4	4	2	0	2	5	5	19	2	0	4	10	3	3
ENSG00000010244	68	111	90	45	19	71	109	42	191	274	230	424	131	341	45	99	77	196	211	592	667	101	8	154	54	180	170	76	161	238	114	46	48	35	8	15	30	23	37	33	57	25	89	62	16	46	94	102	40
ENSG00000010256	541	191	90	154	160	350	569	282	174	105	228	888	118	680	86	73	73	261	193	1089	1203	171	175	83	137	294	230	80	292	301	204	41	69	28	36	34	51	28	42	30	39	54	282	25	22	88	279	234	24
ENSG00000010270	104	67	62	90	18	331	152	56	68	397	104	271	136	235	43	113	69	45	112	276	274	193	124	195	211	351	316	239	402	389	58	17	11	28	24	22	26	20	63	21	59	37	83	108	56	52	68	57	43
ENSG00000010278	971	838	734	1154	1971	2454	2577	4569	1341	3385	2211	4303	3110	3984	1589	1303	2205	3326	2611	2541	3094	5407	6121	4791	4019	2392	13820	11635	10013	6643	929	501	943	462	458	614	479	274	1072	134	800	529	1544	2006	814	856	501	478	658
ENSG00000010282	0	0	0	0	0	0	0	0	0	0	0	0	0	0	0	0	0	0	0	0	0	0	0	0	0	0	0	0	0	0	0	0	0	0	0	0	0	0	0	0	0	0	0	0	0	0	0	0	0
ENSG00000010292	12	16	42	17	3	3	3	17	18	46	71	145	40	131	3	10	10	136	44	170	128	1	0	20	1	7	16	0	12	11	13	6	15	5	7	6	13	7	12	11	10	6	101	16	0	24	30	13	9
ENSG00000010295	3	0	4	1	1	8	6	19	19	0	2	15	3	17	1	0	0	0	0	10	19	0	0	0	0	0	0	0	0	3	0	1	2	0	0	3	0	0	1	1	0	3	3	2	4	2	10	1	1
ENSG00000010310	0	0	0	0	0	0	0	0	0	0	0	0	0	0	0	0	0	0	1	1	1	0	0	0	0	0	0	0	0	0	0	0	1	1	0	0	0	0	0	0	0	0	0	0	0	0	0	0	0
ENSG00000010318	4	4	0	7	6	5	4	1	3	12	3	6	8	6	2	7	13	15	19	14	1	24	16	8	24	0	10	22	17	9	6	6	4	0	0	1	2	2	3	1	0	10	3	5	10	4	4	3	0
ENSG00000010319	0	0	0	0	0	0	0	0	0	0	0	0	0	0	0	0	0	0	0	0	0	0	0	0	0	0	0	0	0	0	0	0	0	0	0	0	0	0	0	0	0	0	0	0	0	0	0	0	0
ENSG00000010322	5	1	1	7	1	14	3	2	38	1	5	28	6	53	5	6	2	31	4	54	42	36	0	0	0	13	19	0	3	19	4	8	6	5	2	0	1	2	6	9	5	1	10	6	1	12	18	11	5
ENSG00000010327	44	17	73	12	9	29	16	1	28	10	8	68	7	46	11	2	15	30	139	69	168	0	0	0	1	0	80	0	0	0	20	17	16	12	17	12	13	13	10	64	13	23	61	12	17	16	73	22	22
ENSG00000010361	2	0	0	0	1	0	4	0	0	0	1	0	0	5	0	0	3	0	0	6	3	0	0	0	0	0	15	0	0	0	0	0	2	0	0	0	0	0	0	0	0	1	1	0	1	1	0	5	0
ENSG00000010379	0	0	0	0	0	0	0	0	0	0	0	0	0	0	0	0	0	0	0	0	0	0	0	0	0	0	0	0	0	0	0	0	0	0	0	0	0	0	0	0	0	0	0	0	0	0	0	0	0
ENSG00000010404	51	46	30	9	18	32	80	86	3	145	119	190	137	209	23	89	126	90	107	201	207	145	99	96	107	180	180	195	173	137	50	18	35	13	23	9	35	11	29	11	24	17	49	51	26	32	11	55	18
ENSG00000010438	0	0	0	0	0	0	0	0	0	0	0	0	0	0	0	0	0	0	0	1	4	0	0	0	0	0	0	0	0	0	0	0	0	0	3	0	0	0	0	0	0	0	0	0	0	0	0	0	0
ENSG00000010539	0	0	0	0	0	5	0	0	0	1	7	30	0	19	1	2	3	1	0	27	3	20	0	0	1	0	0	0	0	19	0	2	5	0	3	0	0	0	0	0	0	7	4	0	1	0	3	6	3
ENSG00000010610	36	40	24	7	3	20	23	2	15	0	98	221	21	407	3	0	1	31	28	607	634	1	1	1	12	40	18	38	14	82	39	7	16	8	4	13	1	5	3	8	4	4	60	7	12	13	93	109	5
ENSG00000010626	1	0	1	8	1	7	9	1	9	9	3	1	3	15	0	2	0	0	14	11	13	0	2	19	0	0	49	2	3	49	3	0	0	0	0	0	0	0	0	0	0	0	3	0	0	0	0	7	2
ENSG00000010671	60	255	209	73	80	41	102	90	106	1450	881	743	623	850	239	472	442	1441	366	889	1047	448	587	340	469	627	1234	1004	910	909	245	165	95	116	138	51	151	63	114	78	119	107	220	125	83	116	278	93	176
ENSG00000010704	5	2	5	3	0	7	1	0	0	8	19	6	13	4	0	2	7	11	2	18	21	3	4	3	1	5	1	2	0	2	1	3	1	4	2	2	0	1	0	0	2	1	7	1	1	2	5	1	0
ENSG00000010803	8	6	0	3	1	2	0	0	0	0	1	17	2	13	2	1	2	10	7	64	30	0	0	0	0	1	7	4	0	8	0	7	5	0	2	3	0	12	0	0	3	1	19	3	3	5	10	4	3
ENSG00000010810	86	68	48	45	69	100	132	78	211	431	446	385	169	464	128	200	102	392	299	418	473	86	61	13	47	161	107	106	130	309	58	74	95	71	43	70	75	62	60	56	46	40	106	128	58	103	123	161	67
ENSG00000010818	7	4	1	8	0	1	1	0	0	19	42	17	11	76	0	8	2	41	18	64	31	0	0	0	0	2	0	3	5	0	3	2	3	2	2	6	6	0	0	2	4	1	5	7	0	7	7	11	2
ENSG00000010932	0	0	0	0	4	0	0	0	0	0	0	0	0	2	0	0	0	0	0	0	0	0	0	0	0	15	0	0	0	0	0	0	0	0	0	0	0	0	0	0	0	0	0	0	0	0	0	1	0
ENSG00000011007	36	16	9	0	9	34	10	20	1	17	34	143	10	146	17	18	11	67	17	150	130	51	4	15	24	11	0	22	20	42	14	17	17	7	4	3	6	8	6	6	8	6	21	6	2	9	27	35	6
ENSG00000011009	105	37	45	74	71	112	146	130	84	55	94	199	60	208	42	29	37	118	105	246	326	63	52	53	4	120	79	283	81	117	50	13	20	17	16	17	42	19	17	17	40	18	81	40	11	29	107	88	12
ENSG00000011021	9	8	1	0	1	0	1	0	0	0	8	14	2	28	0	0	3	30	10	35	56	0	0	0	0	0	0	0	0	6	6	1	1	0	0	0	3	2	0	1	1	1	19	6	0	1	5	12	0
ENSG00000011028	0	0	0	0	0	0	0	6	0	0	0	0	0	0	0	0	0	0	0	0	0	0	0	0	0	0	0	0	0	0	0	1	0	0	0	0	0	0	0	0	0	0	0	0	0	0	0	0	0
ENSG00000011052	0	0	0	0	0	0	0	0	0	0	0	0	0	0	0	0	0	0	0	0	0	0	0	0	0	0	0	0	0	0	0	0	0	0	0	0	0	0	0	0	0	0	0	0	0	0	0	0	0
ENSG00000011083	0	0	0	0	0	0	0	0	0	0	0	0	0	0	0	0	0	0	0	0	0	0	0	0	0	0	0	0	0	0	0	0	0	0	0	0	0	0	0	0	0	0	0	0	0	0	0	0	0
ENSG00000011105	51	15	72	13	31	91	129	171	0	100	91	84	60	44	23	47	57	25	66	69	88	174	167	177	162	315	284	282	111	336	27	31	27	10	13	23	15	22	27	17	38	10	80	71	10	29	18	34	22
ENSG00000011114	1	4	0	0	8	3	0	0	4	3	5	4	7	17	4	3	5	3	6	19	6	0	0	0	0	0	0	8	0	0	0	0	6	0	2	0	3	0	4	0	0	2	6	1	1	3	2	2	0
ENSG00000011132	4	0	0	1	0	11	2	0	7	12	1	4	3	14	0	3	2	15	9	5	0	2	0	2	0	10	31	28	3	52	0	8	6	4	0	0	0	4	1	4	0	4	13	6	2	6	5	2	1
ENSG00000011143	1	4	6	3	0	0	6	0	0	0	7	23	0	30	0	0	0	17	1	52	48	0	0	0	0	0	0	60	0	32	0	0	4	2	0	2	0	0	0	0	0	1	10	2	3	2	8	15	0
ENSG00000011198	55	43	28	26	46	52	39	153	2	123	75	124	56	98	19	32	24	82	55	92	109	147	69	125	61	156	154	129	93	107	16	23	6	0	19	8	14	0	18	29	23	11	40	25	9	11	28	18	13
ENSG00000011201	0	0	0	0	0	0	0	0	0	0	0	0	0	0	0	0	0	0	0	0	0	0	0	0	0	0	0	0	0	0	0	0	0	0	0	0	0	0	0	0	0	0	0	0	0	0	0	0	0
ENSG00000011243	23	1	0	6	4	20	19	1	13	4	2	21	0	5	6	4	3	19	1	14	16	22	0	0	11	1	0	0	6	1	0	5	3	0	0	3	0	0	1	1	5	3	6	14	1	5	6	10	5
ENSG00000011258	40	26	135	20	58	110	101	100	142	293	191	120	137	191	123	107	136	161	298	143	51	308	174	263	74	501	501	607	284	259	24	36	53	73	16	21	35	21	22	37	72	28	62	55	54	86	32	52	52
ENSG00000011260	50	23	7	24	20	64	49	10	181	153	122	69	47	111	9	7	30	273	4	274	108	115	30	67	0	189	163	113	116	160	24	31	44	8	13	13	5	4	8	7	27	19	54	49	21	37	55	82	14
ENSG00000011275	129	48	92	55	57	24	91	182	91	102	137	135	79	320	53	54	56	273	67	467	341	180	2	51	24	60	142	70	62	106	53	17	34	33	20	29	34	12	21	23	25	41	74	52	38	38	73	86	27
ENSG00000011295	6	5	1	1	5	2	2	1	6	8	14	14	9	14	0	0	1	10	12	25	9	2	0	0	2	28	1	0	26	2	1	3	1	1	2	0	9	0	7	0	2	3	1	4	3	0	8	2	5
ENSG00000011304	6	7	15	3	5	11	7	2	5	12	8	9	34	46	2	13	11	16	36	74	17	14	40	27	15	7	14	34	18	26	1	10	19	4	3	7	9	8	8	6	4	11	4	8	4	7	8	17	7
ENSG00000011332	0	0	0	0	0	0	0	0	0	0	0	0	0	0	0	0	0	0	0	0	0	0	0	0	0	0	0	0	0	0	0	0	0	0	0	0	0	0	0	0	0	0	0	0	0	0	0	0	0
ENSG00000011347	0	0	0	0	0	0	0	0	0	0	0	0	0	0	0	0	0	0	0	0	0	0	0	0	0	0	0	0	0	0	0	0	0	0	0	0	0	0	0	0	0	0	0	0	0	0	0	0	0
ENSG00000011376	4	12	3	9	0	1	1	0	0	2	0	31	1	18	0	0	3	10	19	21	52	0	0	0	0	0	0	0	0	1	1	5	4	6	3	2	0	0	1	0	0	5	3	0	0	4	13	0	1
ENSG00000011405	12	10	20	4	4	15	8	1	6	76	76	124	59	101	44	49	16	41	26	139	280	1	0	1	0	1	1	6	2	16	49	3	7	2	22	8	3	4	5	8	9	10	12	11	11	5	7	20	18
ENSG00000011422	227	80	19	33	45	223	148	0	18	0	23	122	6	67	1	0	4	20	9	194	362	0	0	0	0	31	21	16	0	18	100	4	1	1	1	1	10	1	1	8	9	3	21	0	1	2	44	57	21
ENSG00000011426	0	0	3	1	1	0	1	1	0	0	5	14	17	10	1	0	1	4	0	0	15	0	0	1	43	0	0	0	0	1	1	0	9	1	0	0	6	3	0	0	0	0	6	0	3	0	0	0	1
ENSG00000011451	0	0	0	0	0	0	0	0	2	0	0	0	0	2	1	0	2	0	0	0	1	0	0	0	0	0	0	0	0	0	0	0	0	0	0	0	0	0	0	0	0	0	0	0	0	2	1	2	2
ENSG00000011454	67	57	62	48	44	66	44	139	58	150	113	118	155	140	30	78	103	120	149	152	227	45	31	66	24	27	85	120	180	70	51	40	58	59	43	24	18	29	38	20	38	20	49	71	32	25	16	33	43
ENSG00000011465	4	0	0	0	0	0	0	0	0	0	0	0	0	0	0	0	0	0	0	0	0	0	33	0	0	0	0	0	0	0	0	0	0	0	0	0	0	0	0	0	0	0	0	0	0	0	0	0	0
ENSG00000011478	0	0	0	0	0	0	0	0	0	0	4	5	0	2	1	0	0	2	8	0	0	0	0	0	0	0	0	0	0	0	0	0	0	1	0	0	0	0	0	1	0	0	2	5	0	2	1	0	1
ENSG00000011485	19	8	13	1	2	12	10	13	0	0	2	23	4	22	1	0	10	5	3	57	30	88	0	50	0	16	61	24	82	66	4	3	5	0	3	1	3	0	2	3	7	1	15	1	0	5	17	13	0
ENSG00000011523	8	9	0	11	0	2	1	2	4	26	26	62	23	105	6	19	28	25	17	85	95	31	0	11	17	117	42	25	27	58	12	10	9	4	2	5	3	0	21	1	7	2	22	5	4	10	11	7	2
ENSG00000011566	14	0	4	4	2	1	9	2	2	1	27	15	4	32	7	2	9	29	12	26	8	0	0	16	0	1	0	1	14	0	0	3	0	1	0	4	2	1	2	4	2	5	5	6	2	2	4	0	8
ENSG00000011590	0	0	0	0	0	1	0	0	2	0	0	3	0	0	0	0	1	0	7	1	0	0	0	0	0	0	0	0	0	0	0	1	0	1	0	0	0	0	0	0	0	1	6	0	0	0	0	1	0
ENSG00000011600	883	227	93	131	221	806	923	150	314	64	169	793	72	364	25	22	67	187	200	876	1152	117	102	131	146	363	134	161	102	299	214	56	37	54	39	44	56	23	33	54	50	46	402	88	32	90	640	576	76
ENSG00000011638	20	14	23	10	12	7	14	78	13	51	60	103	57	64	25	43	28	72	99	63	73	178	83	41	56	181	60	35	142	183	16	20	9	18	2	15	22	3	15	8	21	6	29	34	12	10	21	42	4
ENSG00000011677	0	0	0	0	0	0	0	0	0	0	0	0	0	0	0	0	0	0	0	0	0	0	0	0	0	0	0	0	0	0	0	0	0	0	0	0	0	0	0	0	0	0	0	0	0	0	0	0	0
ENSG00000012048	10	0	10	13	5	1	8	2	13	11	9	22	6	35	11	19	23	2	2	1	6	3	0	31	88	0	34	0	0	0	1	1	10	0	0	5	0	16	4	2	7	6	0	11	1	1	7	15	6
ENSG00000012061	119	52	78	33	52	107	166	106	94	139	131	187	122	139	40	21	28	59	234	244	374	108	166	197	15	240	135	210	176	147	28	28	21	25	17	5	20	6	35	15	10	24	64	25	10	22	45	67	24
ENSG00000012124	14	31	22	4	4	14	28	6	6	20	29	124	58	205	3	38	39	81	66	273	166	13	4	44	33	71	42	19	23	58	25	10	12	13	0	3	6	4	5	5	28	16	52	22	4	9	49	38	7
ENSG00000012171	1	0	0	3	2	2	0	0	0	0	0	0	0	0	0	0	0	0	0	0	0	0	1	0	0	0	0	0	0	0	0	0	1	1	1	0	0	0	1	0	0	3	1	1	0	0	1	2	1
ENSG00000012174	0	0	7	0	0	1	1	2	0	0	0	30	0	21	0	0	0	2	1	65	36	0	0	0	0	0	0	0	15	2	0	0	4	0	0	0	0	0	1	0	1	0	3	0	0	4	6	5	1
ENSG00000012211	0	0	0	0	0	0	3	0	0	0	0	0	0	2	0	0	0	0	0	13	5	0	0	0	0	0	0	0	0	0	0	0	0	0	0	0	0	0	0	0	0	0	2	0	0	0	2	1	0
ENSG00000012223	120	0	8	29	12	8	34	0	1	7	4	1	0	0	2	0	0	1	36	191	402	0	1	1	0	8	0	50	0	5	26	4	1	1	0	4	8	1	8	1	4	1	36	6	0	13	5	19	5
ENSG00000012232	1	1	2	0	0	0	0	0	0	0	0	2	0	1	0	0	0	9	2	18	14	0	0	0	0	0	0	0	0	3	0	0	1	0	0	0	0	0	0	0	0	0	2	0	1	0	1	4	0
ENSG00000012504	0	0	0	0	0	0	0	0	0	0	0	0	0	0	0	0	0	0	0	0	0	0	0	0	0	0	0	0	0	0	0	0	0	0	0	0	0	0	0	0	0	0	0	0	0	0	0	0	0
ENSG00000012660	10	43	28	17	9	10	13	17	6	23	95	254	9	263	26	66	20	37	23	475	349	15	11	2	6	32	23	34	54	98	23	4	8	10	8	5	6	5	6	18	13	21	63	26	6	19	60	84	9
ENSG00000012779	46	63	29	33	14	50	84	0	23	56	42	242	28	200	8	4	17	31	94	610	560	34	10	0	30	75	22	31	0	120	75	18	8	8	7	7	1	5	6	6	7	4	83	0	3	7	60	125	17
ENSG00000012817	13	0	0	1	0	9	10	0	20	0	107	227	0	0	0	0	36	0	0	515	378	0	0	6	1	0	0	0	0	11	32	0	9	1	23	7	30	0	9	0	6	0	55	40	0	33	51	0	0
ENSG00000012822	25	141	207	15	34	56	63	32	74	996	709	710	533	945	137	226	364	596	607	721	919	359	128	194	143	354	504	496	366	401	214	41	72	52	49	48	75	41	134	22	112	34	236	199	78	110	87	117	68
ENSG00000012963	10	2	0	0	0	4	13	8	24	9	17	51	11	67	0	6	12	8	8	114	85	14	1	12	0	0	2	2	4	55	8	0	0	2	1	1	0	0	6	1	9	1	11	4	1	3	13	11	1
ENSG00000012983	267	123	169	178	238	546	308	131	185	731	482	265	472	660	167	418	311	1026	612	359	353	544	343	278	152	331	1325	662	770	428	161	112	128	120	85	62	94	67	122	37	95	55	234	121	54	103	136	88	105
ENSG00000013016	18	22	75	10	13	49	53	45	21	191	122	125	164	195	78	131	172	71	107	137	147	137	66	73	62	97	252	144	155	107	39	18	19	11	25	20	11	19	42	11	22	17	78	55	26	42	10	32	20
ENSG00000013275	233	104	72	83	85	137	233	112	508	184	160	452	116	401	43	95	93	260	182	602	647	189	156	168	62	762	347	451	319	733	38	36	23	39	11	36	36	28	47	29	47	31	195	43	35	73	171	148	23
ENSG00000013288	6	14	2	0	1	1	5	0	0	0	33	68	11	79	3	1	0	16	19	135	109	0	0	0	0	8	7	4	0	8	6	3	1	2	0	1	11	0	7	1	2	0	24	4	6	9	12	12	0
ENSG00000013293	0	1	0	0	0	0	0	0	0	0	0	0	0	0	1	0	0	0	0	0	0	0	0	0	0	0	0	0	0	0	0	0	0	0	0	0	0	0	0	0	0	0	0	0	0	0	0	0	0
ENSG00000013297	1	0	0	0	0	0	0	0	0	0	0	0	0	0	0	0	0	0	0	0	0	0	0	0	0	0	0	0	0	0	0	0	0	0	0	0	0	0	0	0	0	0	0	0	0	0	0	0	0
ENSG00000013306	67	47	123	174	231	787	790	90	106	96	120	167	30	258	18	26	77	349	127	215	1212	49	311	102	61	350	189	520	139	1344	70	13	47	15	45	43	55	20	26	157	12	56	87	41	6	46	73	98	112
ENSG00000013364	44	33	27	15	12	38	85	0	37	12	147	214	47	302	4	13	59	100	130	579	386	61	1	51	15	50	20	41	11	156	30	9	20	25	10	7	9	18	14	21	11	18	93	15	14	22	81	43	18
ENSG00000013374	229	20	43	137	28	128	76	25	58	46	76	241	72	159	17	36	22	163	124	294	344	27	101	40	0	106	125	10	39	124	47	42	34	12	14	17	36	7	30	10	38	25	91	37	14	39	138	87	45
ENSG00000013375	15	6	13	23	1	4	11	2	40	6	6	46	15	48	8	1	4	49	19	43	70	0	14	0	20	1	11	0	0	5	4	1	13	13	0	0	9	0	0	0	5	1	15	1	0	8	17	14	8
ENSG00000013392	2	0	2	0	0	0	0	0	0	0	2	2	0	2	0	0	0	1	0	9	5	0	0	0	2	7	0	0	0	2	0	0	0	0	0	0	0	0	0	0	0	0	1	0	0	0	1	0	0
ENSG00000013441	259	83	148	66	66	157	134	32	235	51	371	731	139	967	29	40	54	560	255	927	857	111	17	49	46	195	240	117	42	331	132	57	179	9	9	45	89	63	50	50	26	24	176	60	20	102	208	258	39
ENSG00000013503	3	20	0	0	0	0	0	0	0	0	36	29	1	60	0	0	4	0	16	67	43	0	0	0	0	2	0	0	33	10	0	9	10	0	0	3	2	3	8	12	0	0	6	0	1	6	8	46	1
ENSG00000013523	0	1	1	0	0	0	0	0	0	0	7	26	0	36	1	0	0	0	17	45	47	0	0	0	0	0	0	0	4	5	5	0	5	1	0	3	2	0	0	7	0	0	3	2	0	2	8	3	3
ENSG00000013561	12	28	22	10	0	8	16	10	11	122	77	186	91	253	22	52	50	94	71	153	230	0	7	23	20	58	67	71	29	77	62	18	13	18	16	7	10	5	12	6	44	9	42	19	8	17	44	53	11
ENSG00000013563	5	3	8	0	0	3	6	0	0	0	19	12	6	13	1	4	5	3	9	34	25	0	8	8	20	0	11	23	3	13	2	1	3	2	1	1	6	0	6	4	1	4	10	3	3	7	1	2	1
ENSG00000013573	2	1	4	0	1	0	2	0	0	0	0	43	0	32	10	1	6	28	28	180	56	0	0	0	0	0	0	12	4	2	0	1	4	0	0	1	1	0	1	0	0	4	12	1	6	1	7	12	0
ENSG00000013583	17	1	5	43	15	37	47	1	0	34	24	38	51	39	8	11	9	10	33	47	81	44	42	31	3	57	49	112	89	92	27	0	10	6	7	2	5	0	6	6	14	1	15	3	1	5	11	26	3
ENSG00000013588	0	0	0	0	0	0	0	0	0	0	0	0	0	0	1	0	0	0	0	0	0	0	0	0	0	0	0	0	0	0	0	0	0	0	0	0	0	0	0	0	0	0	0	0	0	0	0	0	0
ENSG00000013619	0	0	0	0	0	0	0	0	0	0	2	2	1	0	0	0	0	0	0	0	6	0	0	0	0	0	2	0	0	0	2	0	0	0	0	0	0	0	0	0	0	0	0	0	0	0	0	0	0
ENSG00000013725	3	1	0	6	2	2	5	5	15	4	35	39	0	85	7	0	4	37	1	45	44	0	0	0	0	1	21	2	2	24	7	5	8	2	1	9	3	0	6	4	2	5	15	4	3	7	29	6	0
ENSG00000013810	52	42	123	55	97	96	141	151	71	403	291	149	138	327	37	70	144	511	292	232	295	253	127	164	130	241	260	315	218	284	36	66	47	53	41	61	41	25	76	37	48	54	125	95	31	72	107	74	53
ENSG00000014123	185	31	4	100	20	16	78	140	70	35	94	407	21	300	4	33	20	70	70	369	407	28	0	95	0	94	31	1	59	142	19	19	39	6	8	20	11	16	6	17	15	24	58	43	3	36	68	97	21
ENSG00000014138	2	7	1	0	0	3	7	0	2	2	19	19	1	22	4	25	3	13	1	14	24	0	7	0	0	17	112	0	0	38	4	2	2	3	12	4	0	0	1	0	0	7	12	0	2	16	17	9	0
ENSG00000014164	1	0	0	2	1	0	1	0	2	1	1	1	6	5	2	6	0	0	4	11	14	11	8	3	0	19	5	0	16	12	1	2	0	0	2	0	0	1	0	3	1	2	2	1	1	4	3	6	0
ENSG00000014216	157	268	607	191	190	382	514	250	172	1721	1586	1373	1689	2184	383	906	1115	645	983	1145	1146	2143	1030	2057	930	2650	3840	3682	2378	3515	311	156	106	171	84	105	228	57	324	86	150	134	526	680	299	267	161	287	162
ENSG00000014257	26	13	0	11	0	14	19	0	10	8	6	34	0	8	3	0	0	0	18	88	137	0	0	0	0	0	0	0	0	0	1	5	0	0	0	2	0	0	0	2	3	0	8	0	3	1	18	16	5
ENSG00000014641	304	100	112	77	29	130	143	239	441	83	274	668	115	651	44	42	37	292	122	815	713	73	176	200	64	259	210	261	90	573	91	21	33	24	10	37	47	28	15	26	53	22	204	59	21	49	220	232	37
ENSG00000014824	106	42	69	37	42	37	22	2	85	183	196	179	152	275	48	11	32	73	62	379	183	0	13	56	34	2	1	110	49	58	76	23	41	13	5	9	26	17	16	8	13	18	98	17	11	19	58	41	30
ENSG00000014914	15	4	6	0	8	18	9	0	5	0	7	17	0	11	4	0	1	1	4	58	58	0	0	0	0	0	0	0	0	5	2	0	0	1	0	2	0	0	0	1	4	3	11	0	0	0	11	8	0
ENSG00000014919	20	15	0	0	2	11	26	0	61	19	33	89	6	67	0	6	2	20	15	191	163	0	1	10	0	56	0	18	0	0	2	4	5	2	0	1	0	6	1	7	14	3	19	0	5	10	21	22	7
ENSG00000015133	62	17	17	58	14	31	41	35	41	20	43	81	59	55	16	15	29	37	112	127	60	22	1	9	0	9	32	40	47	25	23	33	56	22	20	22	11	5	22	19	17	44	49	42	16	34	51	47	27
ENSG00000015153	10	8	19	9	29	20	12	51	26	57	57	61	39	72	15	22	22	114	75	36	84	6	57	32	20	50	39	47	62	64	26	18	29	12	8	23	22	10	25	14	10	35	25	15	6	26	21	21	24
ENSG00000015171	8	19	9	35	3	8	15	21	3	30	42	119	38	133	35	28	24	50	31	124	151	156	38	63	0	59	25	45	13	5	22	15	32	11	31	3	0	8	6	3	15	12	14	14	6	12	23	22	6
ENSG00000015285	32	4	14	24	5	47	52	4	45	4	10	31	4	24	2	0	12	34	38	63	40	22	8	36	9	13	17	8	5	24	14	25	11	15	10	12	11	11	14	18	4	20	25	15	11	22	50	39	31
ENSG00000015413	0	0	0	0	0	0	0	0	0	0	0	0	0	0	0	0	0	0	0	0	0	0	0	0	0	0	0	0	0	0	0	0	1	0	0	0	0	0	0	0	0	0	0	0	0	0	0	0	0
ENSG00000015475	187	40	15	37	85	176	183	136	82	127	116	161	109	181	24	35	82	50	94	187	213	162	187	120	75	207	205	293	102	279	30	27	26	21	16	25	32	10	55	10	45	20	81	57	20	30	97	87	30
ENSG00000015479	324	322	504	205	124	248	251	195	183	888	1376	1684	975	1772	365	427	445	739	702	2263	2145	439	446	251	223	336	629	485	618	511	364	150	255	101	78	94	131	91	111	52	155	97	440	213	100	178	320	396	119
ENSG00000015520	0	0	0	0	0	0	0	0	0	0	4	0	0	0	0	0	0	0	0	0	0	0	0	0	0	0	0	0	0	0	0	0	0	0	0	0	0	0	0	0	0	0	0	1	0	0	0	0	0
ENSG00000015532	1	6	9	2	0	5	10	12	0	3	4	5	15	8	0	4	3	18	0	19	8	0	0	17	10	67	35	22	28	18	3	0	1	5	0	1	2	2	9	0	2	3	5	4	4	2	2	1	2
ENSG00000015568	1	0	0	0	0	0	0	0	0	0	0	0	0	1	0	0	0	0	0	0	0	0	0	0	0	0	0	1	0	0	1	0	0	0	0	0	0	0	0	0	0	0	0	0	0	0	0	1	0
ENSG00000015592	0	0	0	0	0	0	0	0	0	0	0	0	0	0	0	0	0	0	0	0	0	0	0	0	0	0	0	0	0	0	0	0	0	0	0	0	0	0	1	0	0	0	0	0	0	0	0	0	0
ENSG00000015676	5	3	0	4	0	2	9	18	7	10	23	37	7	49	3	2	4	27	12	64	70	9	0	1	0	2	0	2	2	3	1	5	5	0	4	3	1	0	0	2	3	7	11	6	5	8	6	13	4
ENSG00000016082	0	0	0	0	0	0	0	0	0	0	0	0	0	0	0	0	0	0	0	0	0	0	0	0	0	0	0	0	0	0	0	0	0	0	0	0	0	0	0	0	0	0	0	0	0	0	0	0	0
ENSG00000016391	0	0	0	0	0	0	0	0	0	0	0	0	0	0	0	0	0	0	0	0	0	0	0	0	0	0	0	0	0	9	0	0	0	0	0	0	0	0	0	0	0	0	0	0	0	0	0	0	0
ENSG00000016402	0	0	0	0	0	0	0	0	0	0	0	0	0	0	0	0	0	0	0	0	0	0	0	0	0	0	0	0	0	0	0	0	0	0	0	0	0	0	0	0	0	0	0	0	0	0	0	0	0
ENSG00000016490	0	0	1	0	0	0	4	0	0	1	2	0	4	0	0	0	1	0	3	1	5	0	0	14	2	0	7	0	0	0	3	1	0	1	0	3	0	0	0	0	0	2	0	0	1	3	1	0	0
ENSG00000016602	1	0	0	0	0	0	0	0	0	0	0	0	0	0	1	0	0	0	0	0	0	0	0	0	0	0	0	0	0	0	0	1	0	0	0	0	0	0	0	0	0	1	0	0	0	0	0	0	0
ENSG00000016864	32	2	1	5	0	9	14	13	106	6	46	74	3	43	0	0	7	57	25	94	115	2	0	18	0	0	48	0	32	20	3	0	26	0	0	8	6	3	4	0	3	5	2	3	0	7	31	20	9
ENSG00000017260	27	286	270	34	27	59	56	52	26	1679	856	1162	1050	964	133	446	273	386	551	623	1314	74	100	95	48	165	107	377	163	211	332	35	58	55	19	35	63	22	74	21	161	36	322	228	56	111	87	116	92
ENSG00000017373	0	0	0	0	0	0	0	0	0	0	0	0	0	0	0	0	0	0	0	0	0	0	0	0	0	0	0	0	0	0	0	0	0	0	0	0	0	0	0	0	0	0	0	0	0	0	0	0	0
ENSG00000017427	0	0	0	0	0	0	0	0	11	0	0	0	0	0	0	0	0	0	1	0	0	0	0	0	0	0	0	0	0	0	0	0	0	0	3	0	0	0	0	0	0	0	0	0	0	0	0	0	0
ENSG00000017483	14	0	17	0	6	17	4	20	4	25	23	12	6	0	2	5	14	4	0	34	23	51	0	0	8	0	46	0	0	30	6	0	0	0	0	4	4	0	3	7	4	5	14	0	7	5	2	8	4
ENSG00000017621	1	0	0	0	3	8	14	13	0	8	6	5	6	14	5	10	4	1	12	14	7	17	22	17	11	9	0	44	13	8	3	0	4	1	7	1	0	0	2	1	2	2	0	16	1	0	0	1	0
ENSG00000017797	41	21	27	17	11	42	46	17	27	44	61	38	43	39	8	2	14	68	52	28	21	45	34	31	36	89	58	77	41	92	15	19	24	8	23	36	10	13	17	8	24	20	17	24	13	24	23	18	30
ENSG00000018189	46	3	6	7	1	12	3	14	4	0	32	53	0	39	0	2	0	16	19	14	29	0	0	0	0	5	17	0	0	3	26	7	10	5	1	13	12	2	21	17	12	5	13	0	2	10	9	6	16
ENSG00000018236	0	0	0	0	0	0	0	0	0	0	0	0	0	0	0	0	0	0	0	0	0	0	0	0	0	0	0	0	0	0	0	0	0	0	0	0	0	0	0	0	0	0	0	0	0	0	0	0	0
ENSG00000018280	131	32	63	28	23	83	157	4	5	0	31	140	0	63	11	0	6	11	72	300	514	0	2	51	20	72	0	1	0	57	34	16	6	18	17	7	11	8	5	23	11	8	68	2	6	11	100	81	37
ENSG00000018408	0	0	0	0	0	0	0	0	0	0	0	0	0	0	1	0	0	0	0	0	0	0	0	0	0	0	0	0	0	0	0	0	0	0	0	0	0	0	0	4	0	0	0	0	0	0	0	0	0
ENSG00000018510	8	20	0	5	2	4	1	14	45	8	10	19	0	43	5	0	0	25	14	51	43	0	5	1	0	7	0	0	0	10	7	5	7	4	12	5	8	0	2	5	3	10	20	15	1	2	18	13	7
ENSG00000018607	0	0	0	0	0	0	0	0	0	0	0	0	0	0	0	0	0	0	0	0	0	0	0	0	0	0	0	0	0	0	0	0	0	1	0	0	0	0	0	0	0	0	0	0	0	0	0	0	0
ENSG00000018610	26	5	2	1	0	11	10	9	18	7	10	21	0	41	7	0	4	0	0	58	57	0	0	51	7	61	0	0	0	22	5	0	0	0	2	0	5	0	1	3	2	1	12	13	0	0	10	8	3
ENSG00000018625	0	0	0	0	1	0	0	0	0	0	0	0	0	0	0	0	0	2	0	0	0	0	0	0	0	0	0	0	0	0	0	0	0	0	0	0	0	0	0	0	0	0	0	0	0	0	0	1	0
ENSG00000018699	22	11	3	18	18	17	13	48	19	3	95	189	21	200	5	22	47	115	72	334	239	2	4	7	3	58	33	1	11	39	3	30	16	13	2	4	2	6	11	3	22	8	47	8	13	25	44	45	18
ENSG00000018869	0	0	2	0	0	17	8	13	0	15	8	6	4	5	3	0	8	17	24	11	6	4	4	0	0	0	4	0	5	14	0	1	3	1	0	1	5	2	1	0	0	0	2	6	0	5	0	3	0
ENSG00000019102	0	0	0	0	0	4	1	3	4	2	1	1	5	2	1	1	0	0	1	5	1	6	0	0	1	1	2	3	3	0	2	0	1	3	1	2	0	0	2	0	2	1	1	1	1	0	1	1	0
ENSG00000019144	0	0	0	0	0	0	0	0	0	0	0	2	0	0	0	0	0	0	0	0	0	0	0	0	0	0	0	0	0	0	0	0	0	1	0	1	0	0	0	0	0	0	0	0	0	0	0	1	0
ENSG00000019169	19	5	21	3	1	20	23	0	4	0	0	14	3	4	0	0	4	20	2	22	20	0	0	0	0	0	0	0	0	0	0	0	0	4	7	0	1	0	0	0	2	0	7	0	4	2	12	2	1
ENSG00000019186	0	0	0	0	0	0	1	0	0	0	0	0	0	0	0	0	0	1	0	0	3	0	0	0	0	0	0	0	0	0	0	0	0	0	0	0	0	0	0	0	0	0	0	0	0	0	0	0	0
ENSG00000019485	1	0	1	0	0	0	1	0	0	0	0	0	0	0	0	0	0	0	0	0	0	0	0	0	1	0	0	0	0	0	0	0	0	0	0	0	0	0	0	0	0	0	0	0	0	0	0	0	0
ENSG00000019505	0	0	0	0	0	0	0	0	0	0	0	0	0	0	0	0	0	0	0	0	0	0	0	0	0	0	0	0	0	0	0	0	0	0	0	0	0	0	0	0	0	0	0	0	0	0	0	0	0
ENSG00000019549	0	0	0	0	0	0	0	0	0	0	0	0	0	0	0	0	0	0	0	0	0	0	0	0	0	0	0	0	0	0	0	0	0	0	0	0	0	0	0	0	0	0	0	0	0	0	0	0	0
ENSG00000019582	9891	3656	2425	4330	3405	7169	13947	2110	2875	847	3239	13094	1141	8212	365	570	707	4281	4228	17438	23638	1321	1059	1315	701	9549	1882	3045	1171	14984	2526	534	597	612	398	399	562	348	558	793	959	622	5895	789	403	881	6286	5697	892
ENSG00000019991	28	6	9	0	0	1	5	0	1	0	0	3	0	0	1	0	0	1	0	26	20	0	0	0	0	0	0	0	0	0	0	0	0	0	0	0	0	0	0	0	4	0	11	0	0	0	3	10	5
ENSG00000019995	12	0	21	10	13	4	19	4	1	0	25	29	14	14	5	5	0	27	5	35	64	0	0	1	1	0	7	0	0	0	15	1	1	4	7	4	3	4	5	6	5	7	9	2	0	3	2	3	7
ENSG00000020129	2	0	0	0	0	0	0	0	0	0	0	1	0	10	1	0	0	0	0	8	0	0	0	0	0	0	0	7	0	2	0	0	3	0	0	0	0	2	0	0	0	0	0	0	4	1	3	0	0
ENSG00000020181	0	0	0	0	0	0	0	0	0	0	0	0	0	0	0	0	0	1	0	0	0	0	0	0	0	0	0	0	0	0	0	0	0	0	0	0	0	0	0	0	0	0	0	0	0	0	0	0	0
ENSG00000020219	0	0	0	0	0	0	0	0	0	0	0	0	0	0	0	0	0	0	0	0	0	0	0	0	0	0	0	0	0	0	0	0	0	0	0	0	0	0	0	0	0	0	0	0	0	0	0	0	0
ENSG00000020256	2	0	0	1	0	2	1	2	7	0	8	33	4	9	0	0	1	0	1	25	18	0	0	0	0	0	2	0	0	1	0	1	0	0	0	0	0	0	0	0	0	1	2	0	0	5	1	4	1
ENSG00000020426	41	16	7	39	23	26	24	59	22	8	37	79	12	44	16	11	17	53	46	31	48	35	2	22	33	21	43	40	17	37	24	17	34	14	7	13	34	8	18	12	15	27	28	23	15	36	27	18	13
ENSG00000020577	3	2	6	5	2	1	3	6	0	0	1	7	4	1	1	0	2	2	9	2	7	9	1	2	4	13	3	0	5	9	0	0	1	4	1	0	1	0	0	1	2	0	3	3	0	1	6	1	2
ENSG00000020633	1	3	0	0	0	6	12	2	0	0	0	9	3	23	0	0	4	2	4	20	6	0	0	0	0	12	4	0	0	4	3	0	3	1	2	1	0	0	0	1	0	0	9	4	0	2	3	7	0
ENSG00000020922	84	35	16	37	18	23	15	35	46	38	161	235	16	148	13	6	13	118	78	444	270	162	21	26	0	0	5	68	54	23	23	20	11	8	7	23	27	10	23	20	18	14	37	38	19	43	36	47	31
ENSG00000021300	4	0	10	0	0	13	7	24	12	6	22	11	9	77	0	1	3	3	6	46	57	0	0	0	0	0	15	2	0	20	1	2	4	0	5	5	0	0	1	1	1	6	19	2	2	6	30	21	1
ENSG00000021355	594	478	674	459	392	864	729	1000	883	1948	1856	1662	1850	2065	390	661	945	1787	1158	1445	2221	1845	1181	1012	1042	1928	2581	1752	2133	1940	488	272	351	184	203	213	430	278	317	129	346	202	530	539	191	312	584	382	269
ENSG00000021461	0	0	0	0	0	0	0	0	0	0	0	0	0	0	0	0	1	0	0	0	0	0	0	0	0	0	0	0	0	0	0	0	0	0	0	0	0	0	3	0	0	0	0	0	0	0	0	0	0
ENSG00000021488	0	0	0	0	0	0	0	0	0	0	0	0	0	0	0	0	0	0	0	0	0	0	0	0	0	0	0	0	0	0	0	0	0	0	0	0	0	0	0	0	0	0	0	0	0	0	4	0	0
ENSG00000021574	13	0	10	5	4	27	27	26	0	13	23	22	14	37	34	13	15	19	24	63	29	0	0	0	0	74	8	28	11	1	2	16	9	6	11	3	4	19	3	3	11	1	9	7	6	13	6	9	5
ENSG00000021645	0	0	0	0	0	0	0	0	0	7	0	0	0	0	0	0	0	0	0	0	0	0	0	0	0	0	0	0	0	0	0	0	0	0	0	0	0	0	0	0	0	0	0	0	0	0	0	0	0
ENSG00000021762	5	0	0	0	1	3	1	0	3	0	1	12	0	5	1	0	2	0	1	15	1	0	0	0	0	0	6	5	12	16	0	1	0	3	4	0	0	1	2	1	0	1	1	1	0	5	3	3	2
ENSG00000021776	39	6	66	9	22	11	8	12	69	28	131	302	55	382	51	20	29	165	35	708	548	0	0	0	25	46	64	0	3	2	13	13	18	20	0	12	6	10	9	15	7	23	73	11	17	12	83	60	23
ENSG00000021826	0	0	0	0	0	0	0	0	0	0	0	0	0	0	2	0	0	0	0	0	0	0	0	0	0	0	0	0	0	0	0	0	0	0	0	0	0	0	0	0	0	0	0	0	0	3	0	0	0
ENSG00000021852	0	0	0	0	0	0	0	0	0	0	0	0	0	0	0	0	0	0	0	0	0	0	0	0	0	0	0	0	0	0	0	0	0	0	0	0	0	0	0	0	0	0	0	0	0	0	0	0	0
ENSG00000022267	17	140	204	54	58	120	180	117	40	524	591	266	660	579	128	321	512	302	553	407	453	317	289	188	96	245	319	474	444	575	92	51	104	64	48	32	59	51	84	68	144	63	172	336	87	225	53	135	63
ENSG00000022277	338	95	71	86	95	317	245	267	197	254	209	367	125	423	94	87	198	269	260	613	510	201	225	166	237	263	347	156	600	256	126	51	62	37	60	36	43	21	67	25	87	48	172	118	51	64	132	162	41
ENSG00000022355	0	0	0	0	0	0	0	0	0	0	0	0	0	0	0	0	0	0	0	0	0	0	0	0	0	0	0	0	0	0	0	0	0	0	0	0	0	0	0	0	0	0	0	0	0	0	0	0	0
ENSG00000022556	6	0	0	3	2	0	0	0	0	0	1	3	1	3	0	0	6	21	7	12	23	0	0	0	0	1	0	6	0	1	1	0	0	2	0	0	1	0	1	13	0	1	2	2	1	4	4	1	3
ENSG00000022567	1	0	0	0	0	3	0	2	0	0	6	2	0	0	0	0	0	0	1	0	0	0	0	3	0	0	0	0	0	3	2	0	1	1	0	0	0	0	0	0	1	0	0	0	0	1	0	1	0
ENSG00000022840	95	93	111	61	41	121	154	87	109	350	294	305	284	321	134	185	203	200	439	388	612	147	128	57	53	96	302	234	133	190	89	43	120	42	45	58	73	45	95	96	73	79	118	141	78	76	70	127	95
ENSG00000022976	0	0	0	0	0	6	1	0	0	0	7	4	1	5	1	0	4	32	12	20	9	1	0	0	0	0	0	4	0	4	2	0	6	0	0	1	0	0	3	4	3	3	2	2	0	3	8	2	0
ENSG00000023041	24	37	14	0	8	25	28	0	84	0	53	170	7	149	9	10	3	75	10	271	251	0	0	0	0	6	19	0	11	18	31	8	16	2	0	9	7	6	15	3	12	21	44	12	1	19	41	56	5
ENSG00000023171	6	2	0	0	0	0	0	0	0	0	0	3	0	0	0	0	0	0	0	0	0	0	0	0	0	0	0	0	0	0	0	0	0	0	0	1	0	0	0	1	1	0	0	0	0	0	0	2	3
ENSG00000023191	319	93	67	90	132	390	595	571	440	400	233	470	162	632	46	56	137	333	366	1103	676	264	335	261	144	731	788	573	585	665	112	53	49	35	13	30	68	15	48	33	47	46	238	56	36	59	173	124	53
ENSG00000023228	42	24	1	2	11	20	15	3	7	35	78	221	64	253	3	26	38	165	31	224	378	44	11	83	40	69	3	10	41	46	22	21	5	14	3	13	10	8	5	14	21	9	51	21	3	19	39	84	6
ENSG00000023287	48	28	7	63	6	36	21	5	54	9	80	126	50	119	10	13	52	101	19	189	111	11	1	29	4	37	72	0	42	47	44	20	12	20	38	15	14	18	12	7	13	12	51	11	8	27	42	38	22
ENSG00000023318	302	93	20	83	17	124	185	85	238	73	165	594	53	611	17	63	42	284	152	790	553	54	1	54	0	282	247	164	188	358	134	33	32	33	10	24	37	24	22	16	28	21	165	27	19	61	179	188	27
ENSG00000023330	36	14	8	32	4	1	14	0	17	14	47	123	41	91	11	1	15	72	5	195	215	0	0	48	14	76	0	72	13	66	4	5	14	2	7	13	24	0	0	1	18	7	32	8	2	4	41	45	12
ENSG00000023445	35	27	25	59	21	47	38	7	62	2	132	189	4	236	12	8	15	30	26	260	248	8	8	4	1	62	36	16	14	124	7	16	27	11	12	12	9	13	19	15	4	35	52	34	8	29	41	39	8
ENSG00000023516	7	4	1	16	4	4	29	4	9	3	8	40	11	36	0	0	5	42	24	32	31	4	0	0	0	0	0	0	0	22	2	2	9	0	0	2	3	3	3	0	2	4	3	3	4	3	7	2	4
ENSG00000023572	13	0	2	0	3	7	4	1	19	0	3	8	1	9	5	2	4	2	0	14	10	0	0	0	12	0	8	13	0	4	0	1	0	0	4	0	0	4	3	1	0	0	8	7	0	7	1	11	0
ENSG00000023608	14	1	0	0	3	1	0	26	8	0	11	17	1	32	1	1	1	6	3	9	38	0	0	0	13	25	6	6	0	12	0	2	3	0	2	2	4	0	5	2	2	1	10	2	0	6	4	7	1
ENSG00000023697	105	247	435	121	93	201	285	309	46	1285	1139	1123	1320	858	178	312	411	673	524	377	974	545	452	850	409	1387	583	751	710	1128	216	184	112	97	94	30	137	154	84	130	204	89	347	261	75	203	164	164	116
ENSG00000023734	201	249	364	189	63	176	252	361	199	945	812	904	714	1374	178	217	473	519	794	779	1161	445	618	500	383	706	927	1142	827	700	238	85	130	97	34	46	73	47	92	127	133	78	267	157	107	174	136	233	97
ENSG00000023839	2	0	0	0	0	6	1	0	0	0	0	36	0	30	0	0	0	1	0	15	23	0	0	0	0	7	0	0	0	0	0	0	0	0	1	1	0	0	0	0	0	2	1	0	0	1	4	0	0
ENSG00000023892	19	0	2	7	3	18	14	3	29	0	23	20	7	121	0	1	3	19	24	99	38	0	30	1	14	22	30	33	0	76	6	5	9	1	0	10	7	1	7	8	0	16	28	3	3	14	36	22	3
ENSG00000023902	139	66	158	120	197	281	296	298	205	584	282	248	325	344	153	132	206	318	369	206	224	451	255	253	192	382	719	580	521	475	100	93	83	80	56	53	104	64	86	73	122	72	105	103	85	108	85	76	79
ENSG00000023909	8	9	11	1	12	28	14	10	16	45	46	27	46	10	21	25	22	13	1	17	15	5	1	2	3	1	34	49	4	21	14	24	14	2	25	6	4	2	19	2	3	2	11	12	7	21	2	11	3
ENSG00000024048	120	50	47	48	33	104	28	41	126	90	149	197	85	328	42	32	14	47	43	587	262	1	47	47	16	103	52	78	14	14	64	30	48	10	36	34	30	16	18	16	29	18	107	28	6	25	51	100	61
ENSG00000024422	1	2	2	0	0	1	7	0	2	5	2	1	4	2	0	2	7	0	8	5	7	62	7	25	0	22	13	8	23	5	0	0	1	1	0	4	0	0	4	0	2	0	2	3	3	3	0	0	0
ENSG00000024526	0	2	0	0	1	0	3	27	9	0	6	9	13	3	1	8	1	3	0	0	0	0	19	0	10	0	3	16	0	6	6	1	0	0	0	0	0	0	2	0	0	1	0	0	0	2	1	0	3
ENSG00000024862	31	20	8	9	29	14	16	21	32	110	104	159	69	131	7	19	29	111	77	182	177	0	38	60	12	105	27	33	58	110	16	13	28	13	17	5	27	17	15	14	24	6	56	28	6	20	39	32	10
ENSG00000025039	14	0	0	1	6	2	3	0	0	0	2	2	4	2	3	3	0	4	0	6	0	0	6	0	4	1	0	0	39	1	1	2	3	0	0	1	2	2	0	2	0	2	5	3	3	0	1	0	3
ENSG00000025156	12	26	4	35	5	10	9	0	4	0	54	133	14	208	0	0	0	42	16	135	91	0	0	0	0	0	0	2	29	29	21	7	10	0	1	4	7	2	5	5	3	4	26	2	2	11	38	30	4
ENSG00000025293	157	44	28	151	26	74	108	31	95	129	195	392	56	451	83	58	66	342	117	424	417	19	74	137	67	449	234	115	148	462	44	66	92	22	30	35	46	25	32	35	32	38	125	39	25	52	128	144	35
ENSG00000025423	0	0	0	0	0	0	4	0	0	0	0	0	0	0	0	0	0	1	0	7	0	0	0	3	0	0	0	0	0	0	0	0	0	0	0	0	0	0	0	0	0	3	3	0	0	2	0	0	0
ENSG00000025434	17	2	0	7	0	0	8	0	18	3	10	20	0	3	9	0	0	0	2	15	15	0	0	0	0	104	0	2	0	13	2	0	1	2	0	1	0	0	2	0	1	1	7	4	2	4	10	7	1
ENSG00000025708	13	1	0	1	4	19	16	2	1	4	0	1	0	3	0	0	0	2	0	4	1	9	0	0	0	0	0	1	0	8	0	1	0	0	0	1	2	0	2	1	0	3	6	0	0	4	3	4	0
ENSG00000025770	12	4	2	23	0	5	21	12	27	17	8	50	18	69	15	3	18	55	26	72	71	21	0	2	0	0	0	10	0	45	9	12	25	15	5	5	0	1	12	7	0	6	15	8	3	10	21	23	5
ENSG00000025772	30	3	3	5	2	24	10	29	44	8	12	61	18	77	6	10	12	28	7	54	130	45	25	13	18	21	0	0	0	21	9	6	7	1	4	1	2	2	3	0	2	3	19	20	6	5	25	22	7
ENSG00000025796	98	31	88	108	33	83	125	44	172	97	156	245	105	224	31	65	53	73	178	225	143	22	33	105	249	68	234	161	162	133	50	31	36	39	21	29	28	16	18	36	32	49	72	38	17	31	79	62	51
ENSG00000025800	4	5	5	7	0	1	4	0	1	5	31	40	8	87	1	4	7	37	12	82	84	0	0	0	0	0	1	0	1	20	3	5	1	3	7	4	2	0	8	0	6	0	12	1	2	4	24	19	2
ENSG00000026025	1163	160	149	217	154	622	580	145	385	60	270	423	83	460	67	29	61	296	197	714	474	245	137	299	84	398	375	252	239	615	93	117	109	60	40	61	68	66	95	107	89	107	347	87	44	132	371	252	93
ENSG00000026036	0	0	0	0	0	0	0	0	0	0	0	0	0	0	0	0	0	0	0	0	0	0	0	0	0	0	0	0	0	0	0	0	0	0	0	0	0	0	0	0	0	0	0	0	0	0	0	0	0
ENSG00000026103	7	21	9	0	0	7	6	0	0	0	41	47	1	110	1	0	6	33	7	98	48	0	0	0	0	10	1	0	0	38	6	0	1	1	3	0	0	3	0	2	2	4	10	7	0	3	36	26	4
ENSG00000026297	35	10	10	22	49	21	32	8	29	8	15	26	5	35	7	9	13	49	32	27	25	52	18	19	3	38	18	17	14	28	6	16	23	5	4	10	18	12	18	20	8	24	42	6	13	20	35	12	7
ENSG00000026508	269	136	40	98	67	219	269	192	196	39	224	581	71	733	22	38	27	254	65	1338	1381	10	66	57	27	260	119	55	21	265	128	21	69	14	16	13	23	29	7	31	35	16	181	38	9	30	163	218	8
ENSG00000026559	0	0	0	3	0	0	0	0	0	0	0	1	0	0	0	0	0	0	0	0	0	0	0	0	0	0	0	0	0	0	0	0	0	0	0	0	0	0	0	0	0	0	0	0	0	0	0	0	0
ENSG00000026652	4	3	6	8	4	3	6	12	0	0	5	8	9	8	0	0	8	1	0	12	6	0	0	0	0	0	5	15	5	0	0	0	1	0	6	4	0	1	0	5	0	0	15	2	0	2	5	5	1
ENSG00000026751	21	11	12	14	2	24	18	0	3	9	24	156	0	25	9	0	6	63	10	136	129	0	0	0	0	13	0	26	0	26	15	7	24	6	7	6	4	3	6	0	3	3	43	15	4	17	42	52	3
ENSG00000026950	14	9	10	12	9	23	28	4	0	45	43	77	45	108	27	13	25	90	40	210	273	26	21	2	18	44	82	48	21	44	21	4	18	9	4	6	18	12	18	20	10	15	32	18	11	21	37	41	22
ENSG00000027001	2	0	0	0	1	3	1	0	0	3	12	7	3	11	6	0	1	1	0	86	10	44	0	0	0	40	1	0	0	0	1	0	2	0	2	3	0	10	0	5	0	2	4	0	0	0	14	9	0
ENSG00000027075	18	3	0	10	0	6	10	26	12	3	16	90	32	86	1	14	3	78	18	184	101	1	0	11	0	0	5	18	12	32	10	9	16	8	16	6	13	8	6	0	2	3	33	8	6	21	38	35	1
ENSG00000027644	0	0	0	0	0	0	0	0	0	0	0	0	0	0	0	0	0	0	0	0	0	0	0	0	0	0	0	0	0	0	0	0	0	0	0	0	0	0	0	0	0	0	0	0	0	0	0	0	0
ENSG00000027697	102	93	52	29	17	72	46	64	66	310	184	477	159	415	28	83	78	145	256	1047	1081	92	38	55	31	318	125	124	121	291	106	36	34	23	25	12	23	31	29	22	42	8	144	39	15	35	179	166	39
ENSG00000027847	10	0	0	0	1	3	12	14	7	0	0	4	5	7	0	3	3	0	2	15	9	9	2	0	0	32	0	0	0	0	0	0	1	0	0	2	0	0	0	3	0	0	9	1	0	0	11	0	5
ENSG00000027869	20	3	7	6	3	28	44	70	17	17	27	77	6	55	10	12	6	7	52	107	59	15	11	14	5	35	64	54	37	24	5	0	14	12	12	4	8	3	12	3	1	3	25	8	5	11	26	30	5
ENSG00000028116	100	31	20	17	25	113	100	210	238	191	207	218	159	278	71	88	102	178	104	276	341	162	159	145	32	60	132	43	257	224	40	63	40	17	22	28	11	27	25	10	39	17	97	29	6	52	47	107	53
ENSG00000028137	11	6	0	2	2	29	41	0	6	0	6	14	0	23	0	5	1	8	7	154	18	25	0	1	0	0	0	17	17	8	2	4	0	6	0	1	0	1	2	1	2	1	9	5	4	2	26	17	6
ENSG00000028203	23	16	47	21	11	1	7	43	10	133	147	163	99	173	66	79	77	91	37	190	208	78	3	4	31	36	80	114	57	135	24	24	38	5	24	12	12	4	38	9	27	14	56	31	13	31	28	61	15
ENSG00000028277	21	4	6	18	11	21	35	5	43	0	23	22	15	48	1	5	4	34	8	114	78	0	1	0	18	27	26	0	0	60	7	16	9	11	3	4	1	6	3	9	1	8	28	5	8	9	31	39	8
ENSG00000028310	2	0	2	3	0	20	0	0	13	0	17	16	12	31	1	5	0	5	16	75	29	0	0	0	0	0	1	0	20	13	0	3	1	11	6	2	14	3	0	12	2	5	10	6	2	3	12	9	3
ENSG00000028528	76	54	57	45	40	108	130	85	107	250	205	354	162	394	52	80	47	125	216	707	599	111	213	161	122	224	221	218	341	253	51	34	49	42	48	17	27	16	35	24	71	54	149	88	30	72	122	130	42
ENSG00000028839	265	142	226	120	65	288	182	518	307	1037	477	350	628	594	74	302	188	652	442	301	550	406	203	266	249	823	709	645	464	669	98	102	76	117	51	32	70	35	131	39	117	54	214	157	59	79	149	67	158
ENSG00000029153	8	0	0	0	0	0	2	0	0	0	0	2	0	0	0	0	1	0	0	0	0	0	0	0	0	1	0	0	4	0	0	0	0	0	0	2	0	1	0	0	0	2	0	0	0	1	1	0	3
ENSG00000029363	336	109	100	126	66	175	133	32	107	33	166	371	54	308	51	23	37	232	163	527	471	2	10	25	47	55	41	77	42	179	94	51	58	19	28	51	20	14	18	28	35	47	156	65	23	58	121	96	55
ENSG00000029364	2	5	1	0	1	3	6	0	1	5	8	55	17	39	2	5	3	17	12	22	32	1	2	0	0	16	0	0	4	0	7	0	8	2	0	2	0	0	2	0	4	1	12	4	0	5	2	6	1
ENSG00000029534	19	84	152	18	41	66	76	97	19	356	341	290	270	211	91	169	280	222	413	142	305	181	77	187	44	108	75	135	151	121	140	47	55	22	25	21	22	25	52	6	54	25	82	74	52	63	13	41	44
ENSG00000029559	0	0	0	0	0	0	0	0	0	0	0	0	0	0	0	0	0	0	0	0	0	0	0	0	0	0	0	0	0	0	0	0	0	0	0	0	0	0	0	0	0	0	0	0	0	0	0	0	0
ENSG00000029639	48	6	1	34	4	18	25	28	35	0	19	72	14	94	14	0	7	3	25	141	93	0	0	0	0	44	4	43	54	75	6	12	9	8	8	10	0	17	4	10	9	4	14	3	4	30	19	51	3
ENSG00000029725	45	10	9	9	21	25	41	7	21	3	96	80	11	83	5	31	11	86	68	164	57	0	26	20	43	35	50	14	2	38	8	8	11	13	4	23	32	13	17	6	5	15	23	29	12	15	25	13	11
ENSG00000029993	4	3	0	1	1	1	6	0	74	0	2	5	0	4	6	0	0	5	0	11	13	0	0	0	0	0	0	0	0	0	6	0	4	0	1	1	0	0	0	2	2	0	3	0	0	0	3	3	0
ENSG00000030066	27	8	5	5	4	3	34	0	0	20	106	365	18	634	22	29	8	70	7	619	734	0	0	0	0	0	14	0	45	21	55	7	18	3	10	4	2	5	8	17	5	13	73	9	7	7	50	77	5
ENSG00000030110	7	10	18	6	6	15	21	1	39	27	36	38	30	83	16	14	14	14	27	76	58	7	0	33	16	47	91	68	33	22	4	7	3	4	7	5	4	3	2	6	2	6	4	16	2	8	25	8	4
ENSG00000030304	0	0	0	0	0	0	0	0	0	0	0	0	0	0	0	0	0	0	0	0	0	0	0	0	0	0	0	0	0	0	0	0	0	0	0	0	0	0	0	0	0	0	0	0	0	0	0	0	0
ENSG00000030419	0	0	4	0	1	1	0	4	8	0	4	7	0	12	0	2	4	2	4	29	13	0	0	0	0	0	0	0	0	0	1	0	0	0	0	2	0	0	0	1	2	0	6	0	0	6	3	9	2
ENSG00000030582	489	298	143	93	133	565	1111	195	127	115	263	944	166	774	7	65	77	141	278	2158	3013	240	219	118	91	291	369	203	136	636	338	20	26	22	35	27	21	26	46	55	58	37	303	62	30	46	559	473	67
ENSG00000031003	44	51	80	77	9	20	40	68	27	92	125	140	107	164	59	78	23	103	129	251	144	4	144	111	0	118	138	52	81	52	64	24	50	33	1	14	59	14	37	19	17	34	37	82	16	34	39	34	33
ENSG00000031081	2	2	0	1	0	0	0	0	0	0	0	5	0	0	0	0	0	0	0	23	27	0	0	0	0	0	0	0	0	0	0	3	0	0	0	0	0	0	2	0	4	2	1	6	0	0	0	3	1
ENSG00000031544	0	0	0	0	0	0	0	0	0	0	0	0	0	0	3	1	0	0	0	0	0	0	0	0	0	0	0	0	0	0	0	0	0	0	0	0	0	0	0	0	1	0	0	0	0	0	0	0	0
ENSG00000031691	5	0	12	5	1	0	3	0	0	0	5	49	5	30	0	0	7	7	21	21	28	0	8	0	0	0	19	17	0	31	0	0	2	0	0	0	11	0	3	2	0	0	4	0	0	6	6	9	2
ENSG00000031698	178	57	46	70	59	222	147	121	183	225	356	752	143	962	45	60	59	117	135	947	1077	24	132	36	55	165	309	220	202	412	35	25	113	32	10	34	40	68	31	34	29	14	129	42	26	43	207	226	35
ENSG00000031823	12	28	0	4	0	5	14	0	85	10	12	48	9	38	3	14	11	12	14	149	32	59	21	0	0	8	36	80	22	38	8	8	17	1	11	0	1	5	0	1	8	7	19	4	3	22	60	32	5
ENSG00000032219	360	84	109	241	56	102	141	12	288	57	193	387	78	363	32	33	33	551	281	510	461	173	0	74	0	220	249	200	102	307	94	74	86	65	24	61	58	47	64	99	51	86	185	68	18	78	175	121	103
ENSG00000032389	51	0	6	38	12	19	40	66	11	9	28	62	3	32	3	0	4	57	6	39	91	5	40	0	0	0	83	55	16	75	3	0	16	5	1	1	0	0	7	2	2	4	15	15	4	8	38	12	1
ENSG00000032444	22	0	5	20	7	22	25	24	19	22	5	8	13	46	0	13	12	1	63	74	36	0	1	5	0	29	27	41	1	35	2	15	4	14	14	6	13	3	27	17	6	13	18	23	3	17	27	28	14
ENSG00000032742	92	71	51	50	59	83	46	99	101	203	158	118	165	268	34	67	41	75	60	219	174	56	89	34	0	54	83	43	57	124	52	7	53	32	18	21	16	8	19	14	61	16	36	27	24	59	26	44	40
ENSG00000033011	14	1	5	9	0	17	11	3	28	9	16	47	0	39	7	13	0	10	9	50	49	0	0	1	0	51	0	0	0	18	4	1	7	0	0	0	3	0	0	1	2	5	10	0	2	2	11	9	1
ENSG00000033030	16	0	2	14	0	5	5	22	7	4	6	112	0	72	39	18	9	5	32	125	170	46	0	9	0	11	24	1	13	8	11	1	4	1	3	4	3	0	4	3	1	4	23	0	3	5	32	37	6
ENSG00000033050	11	3	24	9	10	24	23	0	28	5	73	216	0	137	36	15	34	2	17	243	256	0	36	1	3	0	50	1	9	76	12	7	25	0	1	5	13	4	0	3	4	0	53	12	14	4	51	59	1
ENSG00000033100	1	0	0	0	0	1	2	0	0	0	0	2	0	0	0	1	1	0	0	2	2	0	0	0	0	1	0	0	0	3	0	0	1	0	0	0	0	0	0	1	1	1	3	0	0	0	0	0	0
ENSG00000033122	0	0	0	0	0	0	0	0	0	0	0	1	0	7	0	0	0	0	0	0	5	0	0	0	0	0	0	0	0	7	0	0	0	0	0	1	0	0	0	0	0	0	0	0	0	4	0	0	0
ENSG00000033170	10	34	45	8	16	11	29	42	7	233	60	185	87	44	54	34	14	87	105	85	128	91	28	10	39	26	98	188	155	31	23	13	13	14	35	21	14	17	43	6	15	16	46	53	13	38	17	20	25
ENSG00000033178	16	31	8	2	21	4	12	2	19	33	55	72	6	221	20	33	2	89	60	167	82	0	0	0	0	11	22	4	0	40	21	12	20	4	2	10	0	2	2	13	0	8	24	6	8	14	44	29	12
ENSG00000033327	5	2	6	0	4	6	2	0	0	0	5	9	4	2	1	0	2	0	4	1	1	0	1	0	1	0	0	1	2	0	3	0	0	5	4	1	0	1	0	2	0	0	2	1	2	5	2	1	2
ENSG00000033627	38	48	26	1	16	12	8	12	13	134	167	299	172	176	5	121	47	143	98	234	316	14	6	12	3	47	29	7	16	48	90	9	32	9	12	5	17	4	18	17	14	20	52	63	25	16	38	39	23
ENSG00000033800	103	104	84	54	23	56	68	41	155	481	495	535	168	687	104	164	189	539	489	831	902	172	82	122	286	247	207	161	315	187	138	47	99	52	36	62	71	58	59	42	81	28	201	55	21	89	229	173	65
ENSG00000033867	14	2	3	12	1	10	4	39	8	4	15	58	12	33	3	0	21	29	9	43	23	0	0	0	5	14	1	0	24	0	15	6	11	9	1	18	8	1	4	0	3	11	9	7	4	7	21	7	13
ENSG00000034053	0	1	0	1	1	4	0	0	0	1	0	1	0	0	0	3	7	0	5	12	1	3	0	1	5	0	6	26	10	28	1	0	1	0	0	3	1	1	2	2	0	0	8	1	0	0	6	1	0
ENSG00000034063	0	0	0	0	0	0	0	0	0	0	0	5	0	7	3	3	2	2	0	0	2	0	0	0	0	1	1	0	0	0	0	1	2	0	2	1	0	0	0	1	0	0	0	2	0	0	1	0	1
ENSG00000034152	28	50	83	23	33	116	155	47	9	351	275	191	224	477	100	158	292	225	265	343	216	185	177	115	61	152	326	275	179	233	87	83	38	54	80	31	62	35	92	39	44	37	110	131	53	87	63	90	38
ENSG00000034239	0	0	0	0	0	0	0	0	0	0	0	0	0	0	0	0	0	0	0	0	0	0	0	0	0	0	0	0	0	0	0	0	0	0	0	0	0	0	0	0	0	0	0	0	0	0	0	0	0
ENSG00000034510	1653	470	431	585	533	1346	1146	645	1928	284	1541	2217	433	1804	141	160	257	2062	1045	1581	2508	275	212	412	294	770	405	551	218	1556	550	365	745	446	324	375	566	280	390	449	341	445	1844	656	285	783	1774	1274	235
ENSG00000034533	1	3	4	8	0	1	7	0	0	0	11	20	6	28	2	0	0	9	17	52	54	0	0	0	0	0	0	0	0	7	1	0	4	2	1	1	0	2	1	0	1	0	10	4	0	5	7	11	0
ENSG00000034677	31	9	37	14	16	13	23	1	7	10	27	48	15	63	3	21	13	49	26	115	79	0	1	0	2	15	6	15	20	5	18	10	6	12	4	6	10	7	1	8	9	12	29	8	3	10	15	23	15
ENSG00000034693	13	9	8	7	0	0	16	0	2	4	80	71	0	159	3	26	22	156	43	224	203	5	2	0	0	59	40	55	20	64	9	7	7	11	0	6	8	0	3	5	8	6	30	3	8	3	34	26	4
ENSG00000034713	591	453	637	585	717	1122	1036	3476	892	2152	1984	1490	1992	1498	513	675	982	1496	1573	875	1301	2372	2594	2105	1421	2957	3865	2834	2381	2519	392	436	429	224	234	279	472	249	440	236	518	337	662	580	325	475	322	360	316
ENSG00000034971	0	0	0	0	0	0	0	0	0	0	0	0	0	0	0	0	0	0	0	0	0	0	0	0	0	0	0	0	0	0	0	0	0	0	0	0	0	0	0	0	0	0	0	0	0	0	0	0	0
ENSG00000035115	12	7	12	15	9	8	24	27	2	6	56	66	1	160	0	11	14	94	31	239	118	14	13	0	13	66	31	41	23	13	5	1	0	0	10	1	6	11	3	3	12	1	18	8	2	19	17	45	5
ENSG00000035141	4	3	2	3	1	5	9	8	16	1	9	19	4	11	4	0	0	22	6	22	45	2	0	2	0	3	0	2	0	9	4	1	5	1	1	7	3	1	2	0	1	1	6	4	1	6	4	6	1
ENSG00000035403	1535	2947	5010	801	1068	3159	2855	3555	744	10666	12418	17924	15007	12216	3900	8553	8851	5595	6661	13689	15981	2704	1560	2212	1165	2704	4980	3159	2940	2127	4299	749	1969	973	766	471	1311	688	1747	391	2285	955	3548	4511	1400	2198	674	2666	970
ENSG00000035499	2	0	0	0	1	0	0	1	0	3	7	7	0	4	0	0	0	1	0	0	0	0	6	3	0	1	0	0	0	0	0	1	0	0	7	0	0	0	1	0	0	0	5	0	0	0	0	3	0
ENSG00000035664	4	4	1	1	2	2	2	1	0	6	0	8	4	5	1	1	6	4	1	0	11	0	14	2	6	2	2	4	2	6	1	0	1	2	0	2	2	0	2	0	1	2	0	7	2	0	2	3	0
ENSG00000035681	30	31	5	1	8	20	2	23	81	0	48	120	27	176	25	0	17	34	13	404	257	0	23	0	0	18	0	0	22	70	13	2	28	5	15	9	0	3	3	7	5	4	49	6	6	22	42	53	12
ENSG00000035687	33	12	17	8	8	22	23	9	14	6	33	128	1	117	5	20	12	31	42	280	168	5	45	21	0	54	0	20	7	66	14	21	31	15	5	4	8	3	4	22	3	9	69	7	2	16	45	35	14
ENSG00000035720	85	17	16	57	8	38	55	72	59	3	24	116	0	58	21	5	5	45	68	161	114	11	0	73	11	248	0	0	0	100	27	2	15	14	3	5	9	2	4	10	10	10	47	3	1	2	40	18	8
ENSG00000035862	3	0	2	0	0	0	0	0	0	0	0	1	0	1	0	0	0	1	0	0	0	0	0	0	0	0	0	0	0	0	1	0	0	0	0	0	0	0	0	1	0	0	0	0	0	0	0	0	2
ENSG00000035928	131	34	40	41	62	82	71	45	332	41	166	193	71	241	38	57	18	179	202	247	271	63	157	21	75	39	99	207	45	209	27	30	65	30	23	28	45	29	34	27	14	39	76	51	28	61	68	76	27
ENSG00000036054	43	75	104	38	42	52	81	103	52	659	303	419	402	309	110	128	154	155	95	505	488	314	443	207	40	212	227	423	361	295	103	39	20	19	45	38	68	35	88	22	72	21	148	106	25	43	64	79	86
ENSG00000036257	27	23	10	35	1	9	16	34	4	14	41	28	71	55	5	16	3	102	15	113	96	1	31	37	15	28	2	0	2	21	12	32	33	8	1	15	10	19	5	12	19	9	39	17	18	44	36	35	14
ENSG00000036448	110	0	0	10	10	5	53	16	3	11	34	154	0	44	5	13	3	9	48	16	20	1	0	0	0	0	17	0	30	76	3	4	3	0	17	1	5	2	4	0	17	0	39	59	0	8	29	3	3
ENSG00000036473	0	0	0	0	0	0	0	0	0	0	0	0	0	0	0	0	0	0	0	0	0	0	0	0	0	0	0	0	0	0	0	0	0	0	0	0	0	0	0	0	0	0	0	0	0	0	0	0	0
ENSG00000036530	0	0	0	0	0	0	0	0	0	0	0	0	0	0	0	1	0	0	1	0	0	0	0	0	0	0	0	0	0	0	0	0	0	0	0	0	0	0	0	0	0	0	0	0	0	0	0	0	0
ENSG00000036549	20	18	0	7	4	4	26	3	53	39	68	72	18	127	14	20	17	58	68	164	44	16	6	4	0	26	10	36	15	19	18	8	4	2	7	6	3	2	9	3	9	8	28	7	0	15	23	20	8
ENSG00000036565	2	0	0	2	0	0	0	1	3	0	0	0	0	0	0	0	2	0	0	0	0	0	0	0	0	0	0	0	0	0	4	0	0	0	0	0	1	0	0	0	0	2	0	0	0	0	1	0	0
ENSG00000036672	0	0	0	0	0	0	0	0	0	0	0	0	0	0	0	0	0	0	0	0	0	0	0	0	0	0	0	0	0	0	0	0	0	0	0	0	0	0	0	0	0	0	0	2	0	0	0	0	0
ENSG00000036828	0	0	0	0	0	0	0	0	0	0	0	0	0	0	0	0	0	0	0	0	0	0	0	0	0	0	0	0	0	0	0	0	0	0	0	0	0	0	0	0	0	0	0	0	0	0	0	0	0
ENSG00000037042	5	14	11	2	3	3	23	25	0	13	21	21	19	26	10	3	9	40	0	47	11	59	15	0	30	0	42	0	0	25	2	0	10	6	1	0	5	2	0	0	2	1	10	6	7	0	4	13	0
ENSG00000037241	26	9	0	11	2	26	9	28	33	8	19	43	10	24	1	8	9	38	6	24	45	5	18	6	13	19	1	12	3	27	5	0	14	4	8	3	7	1	3	3	4	3	18	1	0	6	23	13	3
ENSG00000037280	0	0	0	0	0	0	1	0	0	0	0	0	0	2	0	0	5	0	0	0	0	0	0	0	0	0	0	0	0	1	0	0	0	0	0	0	0	0	0	0	0	0	0	0	1	1	0	8	0
ENSG00000037474	28	0	7	3	3	5	18	1	13	0	70	63	1	109	12	1	8	6	82	205	102	1	1	12	1	12	12	0	0	57	1	11	15	2	6	7	2	3	1	9	8	11	37	13	17	11	53	30	5
ENSG00000037637	2	5	7	8	0	13	4	12	0	3	19	21	10	50	2	6	5	45	31	58	46	37	1	4	7	77	0	55	20	31	4	0	8	6	7	0	0	1	1	7	5	2	17	2	4	10	25	18	2
ENSG00000037749	3	5	1	3	0	5	0	1	0	1	6	6	2	3	0	2	5	7	3	8	4	0	10	1	0	0	0	0	0	1	0	0	0	3	0	1	0	1	0	0	0	0	1	0	0	0	5	3	0
ENSG00000037757	3	0	0	0	3	1	1	0	0	0	1	4	0	7	0	0	0	0	0	4	3	0	0	0	0	0	0	0	8	0	0	0	1	1	0	0	0	1	0	0	0	0	2	2	0	2	0	6	0
ENSG00000037897	5	3	0	1	0	2	7	0	0	0	1	11	2	19	0	0	0	26	0	7	36	0	0	6	0	0	14	0	12	76	2	2	13	0	0	0	0	0	0	0	0	5	1	4	2	3	4	4	0
ENSG00000037965	0	0	0	0	0	0	0	0	0	0	0	0	0	0	0	0	0	0	0	0	0	0	0	0	0	0	0	0	0	0	0	0	0	0	0	0	0	0	0	0	0	0	0	0	0	0	0	0	0
ENSG00000038002	96	11	13	28	4	77	42	1	1	6	45	169	17	208	7	0	12	14	1	213	251	0	8	69	0	11	0	1	17	59	21	3	7	0	0	0	7	9	0	4	3	1	28	20	3	1	28	40	4
ENSG00000038210	10	2	5	7	10	1	9	6	0	15	15	17	9	23	4	4	6	23	5	6	22	3	6	3	6	15	37	22	18	15	7	8	6	6	3	4	2	9	7	4	9	2	11	6	7	6	7	9	3
ENSG00000038219	204	25	96	151	32	68	89	56	149	24	182	240	36	176	39	12	48	265	341	286	179	34	46	1	32	59	37	60	7	143	37	87	87	37	67	92	50	35	62	77	60	99	152	69	33	133	127	84	151
ENSG00000038274	27	58	103	46	27	45	63	2	154	267	406	792	171	765	51	81	107	385	129	927	877	171	78	138	79	340	354	287	236	575	45	40	56	24	14	39	57	38	20	17	106	27	241	78	39	69	237	230	41
ENSG00000038295	0	0	0	0	0	0	0	0	0	0	0	0	0	0	0	0	0	0	0	0	0	0	0	0	0	0	0	0	0	0	0	0	0	0	0	0	0	0	0	0	0	0	0	0	0	0	0	0	0
ENSG00000038358	1	4	2	3	2	2	7	23	1	0	13	12	4	86	0	1	10	35	28	129	42	1	0	0	0	1	0	12	0	10	0	5	10	0	1	2	0	5	0	2	6	2	32	2	0	3	12	16	1
ENSG00000038382	15	28	12	36	1	1	10	1	7	6	7	8	3	19	1	5	1	5	81	26	0	1	0	0	0	0	4	0	1	4	0	1	7	7	18	2	10	0	0	7	5	9	8	18	2	3	7	3	1
ENSG00000038427	277	75	62	27	39	134	153	8	80	2	71	344	5	183	13	2	2	32	48	881	800	0	0	0	0	68	0	5	0	71	115	42	12	1	7	15	12	1	8	53	23	32	143	15	9	19	164	224	55
ENSG00000038532	16	13	2	1	12	2	17	1	48	27	42	46	25	43	5	2	11	20	59	77	88	3	1	27	1	18	0	1	42	50	11	5	10	3	20	3	3	0	1	9	9	9	5	4	9	4	18	7	4
ENSG00000038945	2	0	0	2	0	5	1	0	1	0	1	1	0	2	0	2	2	0	8	10	0	0	0	0	0	0	0	0	0	0	1	0	0	1	0	0	1	0	0	3	0	0	1	3	0	1	2	0	1
ENSG00000039068	1	0	0	0	0	0	1	0	0	0	0	0	0	0	2	0	3	0	0	7	4	0	0	0	0	0	0	0	0	0	4	1	0	0	0	1	0	0	0	0	0	0	4	0	0	0	0	0	0
ENSG00000039123	39	73	77	25	2	15	24	1	74	90	226	536	35	449	16	50	20	310	34	494	524	2	1	0	18	1	11	58	6	0	37	11	42	21	9	3	14	18	10	8	42	32	106	22	10	56	105	48	14
ENSG00000039139	0	0	0	0	0	0	0	0	0	0	0	0	0	0	0	0	2	0	0	0	0	0	0	0	0	0	0	0	0	0	0	0	0	0	0	0	0	0	0	0	0	0	1	0	0	0	0	0	0
ENSG00000039319	26	7	1	11	18	0	12	3	4	0	9	67	4	21	1	0	6	21	27	47	126	0	0	10	0	0	0	27	0	0	4	6	13	3	15	4	1	4	7	10	4	8	10	3	2	4	17	28	18
ENSG00000039523	24	23	44	18	4	13	36	8	0	1	4	75	9	29	2	8	0	14	22	131	98	12	0	3	13	19	0	2	0	15	8	6	2	10	2	4	8	1	7	22	6	14	14	1	4	5	21	7	8
ENSG00000039537	0	0	0	0	0	0	0	0	0	0	0	0	0	0	0	0	0	0	0	0	0	0	0	0	0	0	0	0	0	0	0	0	0	0	0	0	0	0	0	0	0	0	0	0	0	0	0	0	0
ENSG00000039560	0	0	0	0	0	0	0	0	0	0	0	6	0	0	0	0	1	0	3	1	0	0	0	0	0	0	0	0	0	0	0	0	0	0	0	0	0	0	0	1	0	0	0	0	0	0	0	1	0
ENSG00000039600	0	0	0	0	0	0	0	0	0	0	0	0	0	1	0	0	0	0	0	1	0	0	0	0	0	0	0	0	0	0	0	0	0	0	0	0	0	0	0	0	0	0	0	0	0	0	0	0	0
ENSG00000039650	19	6	0	42	1	13	22	0	42	0	7	23	10	26	6	10	6	49	55	35	12	0	44	28	0	3	21	12	0	68	6	1	5	17	5	6	29	0	10	14	4	23	29	19	5	9	10	17	1
ENSG00000039987	2	0	0	0	0	0	0	0	0	0	0	0	0	10	13	2	6	1	2	4	5	0	0	0	5	0	22	0	10	6	1	0	0	2	0	0	0	0	1	0	0	0	1	0	0	2	0	0	0
ENSG00000040199	0	1	0	0	1	0	0	0	0	0	5	0	0	2	2	0	0	0	0	0	4	0	0	0	0	2	0	0	0	0	1	0	0	0	0	2	0	0	1	0	2	0	0	0	0	2	1	1	0
ENSG00000040275	5	0	21	0	0	8	8	6	75	7	52	59	7	36	5	21	8	15	20	63	2	0	4	0	0	0	21	44	0	53	0	0	0	0	5	6	0	23	1	0	1	2	13	19	3	13	7	16	0
ENSG00000040341	73	108	77	123	102	161	132	101	96	399	409	294	341	366	66	173	146	406	376	369	449	216	181	203	98	436	202	193	313	331	98	86	47	40	34	40	63	25	48	39	67	51	100	89	40	73	93	40	64
ENSG00000040487	6	0	2	0	2	25	10	19	0	16	4	5	0	3	2	3	10	14	30	4	5	0	0	0	0	65	42	0	20	28	1	0	1	0	5	0	0	0	2	0	7	2	4	7	0	4	0	6	0
ENSG00000040531	16	15	52	16	5	14	19	47	16	208	74	100	106	79	13	37	43	73	84	70	152	115	59	116	36	154	112	88	75	125	29	13	2	12	19	6	10	7	9	9	39	3	47	26	2	26	17	23	3
ENSG00000040608	0	0	0	0	0	0	0	0	0	0	0	0	0	1	0	0	0	0	0	0	0	0	0	0	0	0	0	0	0	0	0	0	0	0	0	0	0	0	0	0	0	0	0	0	0	0	0	0	0
ENSG00000040633	5	0	0	1	2	5	8	0	1	2	8	5	8	10	1	1	0	2	13	18	17	0	0	0	0	0	7	23	11	20	3	2	0	2	0	0	0	0	1	0	0	1	8	1	0	1	1	3	3
ENSG00000040731	0	0	0	0	0	0	0	0	0	0	1	0	0	0	0	0	0	0	0	2	0	0	0	0	0	0	0	0	0	0	0	1	2	0	0	0	0	0	0	0	0	0	0	0	0	0	0	0	0
ENSG00000040933	9	3	15	4	0	4	4	2	35	3	12	71	1	49	4	0	0	14	2	55	45	0	0	1	0	0	0	0	0	2	4	4	8	0	9	7	3	1	1	3	5	12	9	13	1	5	11	17	4
ENSG00000041353	185	234	285	244	227	404	398	564	232	1570	990	931	1206	745	246	642	548	1177	653	615	857	513	410	693	421	355	714	597	605	580	270	137	203	151	104	108	150	97	169	55	200	127	289	286	118	168	119	159	251
ENSG00000041357	794	93	40	160	80	335	330	306	841	26	233	782	101	472	23	75	103	350	76	775	941	54	144	66	227	341	339	132	266	595	110	35	82	20	10	24	40	32	29	36	34	34	258	53	30	83	268	240	33
ENSG00000041515	5	0	0	0	0	0	0	0	0	0	0	0	0	12	0	0	0	0	0	0	0	0	0	0	0	0	0	0	0	0	0	0	0	0	0	1	0	0	0	0	0	0	0	0	0	0	0	0	0
ENSG00000041802	25	7	0	21	7	17	17	2	4	64	47	76	54	131	14	1	5	47	18	150	97	7	51	0	15	7	35	10	0	72	0	24	16	0	8	5	4	4	10	2	9	5	42	6	13	22	20	37	7
ENSG00000041880	7	0	0	1	0	0	8	26	0	2	8	6	13	35	0	0	0	0	4	53	29	28	0	0	9	0	0	45	0	18	2	2	2	1	0	0	4	3	0	5	0	0	9	1	2	2	5	9	0
ENSG00000041982	0	0	0	0	0	0	0	0	0	0	0	0	0	0	0	0	0	0	0	0	0	0	0	0	0	0	0	0	0	0	0	0	0	0	0	0	0	0	0	0	0	0	0	0	0	0	0	0	0
ENSG00000041988	16	1	0	6	1	0	9	0	23	0	17	19	1	19	1	2	0	5	10	46	41	0	7	0	0	2	0	0	0	34	2	0	8	0	2	1	2	1	0	0	3	3	5	0	3	4	11	15	2
ENSG00000042062	1	3	6	4	1	12	13	8	6	9	23	7	4	7	6	3	12	3	22	7	29	4	3	1	7	4	54	6	19	14	7	3	1	4	0	0	11	0	6	3	2	5	19	2	1	4	2	0	3
ENSG00000042088	1	3	17	6	0	14	5	0	47	15	33	166	17	143	13	11	12	59	33	211	215	0	0	63	0	0	0	49	1	47	11	5	0	3	0	2	1	11	0	16	1	6	28	8	0	13	36	51	4
ENSG00000042286	5	0	0	0	5	0	0	0	0	16	0	10	0	4	0	8	0	0	4	6	15	0	0	0	0	0	0	0	0	0	0	1	0	0	3	0	0	0	0	0	0	0	0	3	0	0	4	4	0
ENSG00000042304	0	0	0	0	0	0	0	0	0	0	0	0	0	0	0	0	0	0	0	0	0	0	0	0	0	0	0	0	0	1	0	0	0	1	0	0	0	0	0	0	0	0	0	0	0	0	0	0	0
ENSG00000042317	7	2	22	26	11	5	3	0	0	5	25	6	0	13	0	0	6	0	5	9	22	0	0	0	0	0	0	0	0	0	0	1	9	0	0	2	1	1	2	0	0	7	14	0	0	0	3	7	5
ENSG00000042429	3	5	0	0	0	4	2	0	4	0	36	47	12	48	6	5	5	44	10	79	39	0	0	0	0	29	0	15	0	25	7	1	9	0	4	10	3	3	0	7	2	2	16	5	3	8	7	9	5
ENSG00000042445	2	3	0	4	0	0	0	0	0	0	4	12	0	10	0	0	3	1	0	53	9	0	0	0	0	0	3	0	0	0	1	2	1	0	0	0	0	0	0	1	0	0	7	3	0	0	3	2	0
ENSG00000042493	437	80	38	150	128	474	612	33	92	19	116	339	24	246	7	13	35	150	87	554	749	75	87	89	71	259	38	120	87	230	63	17	21	23	24	13	49	28	11	39	29	34	195	32	8	25	179	183	52
ENSG00000042753	771	139	166	191	618	944	1092	1563	416	893	581	452	540	362	114	179	271	214	659	418	433	978	776	856	680	1163	932	988	581	610	135	117	117	103	69	91	137	79	166	100	271	81	217	281	79	177	180	171	119
ENSG00000042781	0	0	1	0	0	0	0	0	0	0	0	0	0	0	0	0	0	0	0	0	0	0	0	0	0	0	0	0	0	0	0	0	0	0	0	0	0	0	0	0	0	0	0	0	0	0	0	0	0
ENSG00000042813	0	0	0	0	0	0	0	0	0	0	0	0	0	0	0	0	0	0	0	0	0	0	0	0	0	0	0	0	0	0	0	0	0	0	0	0	0	0	0	0	0	0	0	0	0	0	0	0	0
ENSG00000042832	16	0	9	34	22	0	3	46	0	0	9	9	0	43	8	11	9	22	24	21	0	0	0	0	0	0	72	22	7	0	2	1	0	6	0	4	0	0	10	0	8	0	0	9	0	0	2	5	4
ENSG00000042980	56	21	34	35	21	26	38	0	0	13	13	188	34	131	4	4	7	133	39	210	334	1	0	37	0	41	34	0	0	194	23	5	6	8	1	6	6	4	11	11	13	8	44	5	4	15	61	64	13
ENSG00000043039	0	0	0	0	0	0	0	0	0	0	0	0	0	0	0	0	0	0	0	0	0	0	0	0	0	0	0	0	0	0	0	0	0	0	0	0	0	0	0	0	0	0	0	0	0	0	0	0	0
ENSG00000043093	36	54	57	23	56	64	46	42	40	179	217	159	133	222	20	85	96	216	122	221	252	129	62	69	31	104	64	46	119	60	85	50	36	30	22	14	29	19	21	9	61	18	98	42	19	30	49	51	21
ENSG00000043143	5	0	2	0	5	2	4	8	2	5	9	8	3	18	4	1	0	10	1	34	10	0	1	0	16	0	11	0	1	10	6	2	2	1	2	1	0	2	1	3	0	2	2	6	0	8	13	3	5
ENSG00000043355	0	0	0	0	0	0	0	0	0	0	0	0	0	0	0	0	0	0	0	0	0	0	0	0	0	0	0	0	0	0	0	0	0	0	0	0	0	0	0	0	0	0	0	0	0	0	0	0	0
ENSG00000043462	70	116	97	23	29	97	87	24	138	309	311	280	165	751	102	84	85	370	188	551	725	98	38	12	82	126	235	272	180	304	113	54	87	71	49	44	90	42	72	34	74	53	268	118	25	121	269	162	80
ENSG00000043514	6	4	14	1	0	0	1	17	28	10	12	34	16	59	0	5	0	0	0	123	78	55	4	0	0	1	0	1	0	5	8	0	0	1	0	1	16	0	3	3	0	0	9	2	2	2	38	16	2
ENSG00000043591	0	0	0	0	0	0	1	0	0	0	0	0	0	0	0	0	0	0	0	0	0	0	0	0	0	0	0	0	0	0	0	0	0	0	0	0	0	0	0	0	0	0	0	0	0	0	0	0	0
ENSG00000044012	0	0	0	0	0	0	0	0	0	0	0	0	0	0	0	0	0	0	0	0	0	0	0	0	0	0	0	0	0	0	0	0	0	0	0	0	0	0	0	0	0	0	0	0	0	0	0	0	0
ENSG00000044090	3	0	0	0	0	2	6	0	0	0	6	15	6	25	0	1	2	0	3	5	30	0	0	0	0	0	2	0	0	0	3	0	5	4	0	0	5	8	0	3	0	0	8	1	2	8	4	4	1
ENSG00000044115	77	168	86	9	42	67	40	30	76	201	285	525	300	232	89	184	113	145	127	586	588	27	1	29	63	223	193	164	175	82	99	24	18	23	14	11	26	3	56	29	58	38	84	110	37	47	66	85	37
ENSG00000044446	20	16	4	14	1	6	19	0	0	0	20	43	2	14	1	0	1	29	92	103	34	0	0	0	0	7	10	0	0	13	1	5	19	2	0	5	5	0	8	4	12	7	7	1	1	16	17	7	4
ENSG00000044459	113	78	86	59	108	94	87	268	76	184	223	121	145	114	129	74	129	101	193	124	97	143	104	149	52	255	170	111	169	69	73	73	59	64	50	31	51	42	22	20	48	39	53	30	23	59	40	22	55
ENSG00000044524	0	0	0	0	0	0	0	0	0	0	0	0	0	0	0	0	0	0	0	0	0	0	0	0	0	0	0	0	0	0	0	0	0	0	0	0	0	0	0	0	0	0	0	0	0	0	0	0	0
ENSG00000044574	153	169	87	55	18	134	157	58	191	7	232	917	41	905	20	26	17	136	90	1043	1272	6	16	31	0	162	45	65	19	214	209	10	23	21	7	17	18	16	4	13	25	9	205	22	12	37	245	254	11
ENSG00000046604	0	0	0	0	0	0	0	0	0	0	0	0	0	0	0	0	0	17	0	0	0	0	0	0	0	0	0	0	0	0	0	0	0	0	0	0	0	0	0	0	0	0	0	0	0	0	0	0	1
ENSG00000046647	5	0	0	0	0	3	4	11	18	2	11	4	0	16	0	1	4	4	5	14	24	0	0	0	7	0	9	32	0	11	4	0	1	2	12	0	4	3	0	0	0	1	5	2	1	1	20	4	0
ENSG00000046651	416	100	169	260	94	221	178	313	111	188	215	231	313	538	70	108	61	432	274	412	477	27	264	212	98	453	127	310	193	260	109	172	134	103	80	104	144	88	50	101	100	134	263	142	82	172	160	167	113
ENSG00000046653	0	0	0	2	0	3	0	0	0	0	2	0	1	5	0	0	0	1	0	1	0	0	0	0	0	0	0	0	0	6	0	0	0	0	0	0	0	0	0	0	0	0	3	0	0	0	1	0	0
ENSG00000046774	0	0	0	0	0	0	0	0	0	0	0	0	0	0	0	0	0	0	0	0	0	0	0	0	0	0	0	0	0	0	0	0	0	0	0	0	0	0	0	0	0	0	0	0	0	0	0	0	0
ENSG00000046889	0	0	0	0	0	0	0	0	0	0	0	0	0	0	0	0	0	0	0	0	0	0	0	0	0	0	0	0	0	0	0	0	0	0	0	0	0	0	0	0	1	0	0	0	0	0	0	0	0
ENSG00000047056	12	9	4	2	2	2	5	1	0	13	39	32	13	52	12	3	12	4	30	52	45	13	2	1	2	1	0	12	2	3	5	8	2	12	8	8	2	2	7	0	3	0	18	6	3	6	10	14	1
ENSG00000047188	27	7	14	37	3	3	42	5	19	56	53	64	48	60	27	21	53	53	10	197	93	30	1	69	16	26	67	18	1	39	19	13	8	20	3	15	16	16	22	7	8	25	40	18	13	19	28	35	23
ENSG00000047230	1	6	0	0	3	6	2	3	0	0	0	14	10	15	0	4	18	2	1	0	37	0	0	0	51	0	0	0	0	0	37	0	7	8	1	0	0	0	3	0	0	4	4	5	1	10	15	4	2
ENSG00000047249	27	36	15	34	3	77	31	2	47	39	113	161	38	184	0	10	26	46	27	441	206	74	0	58	73	158	52	29	110	196	22	10	29	17	6	25	4	5	8	9	11	7	45	7	8	4	52	76	3
ENSG00000047315	152	18	131	88	42	58	39	44	113	85	257	474	67	574	35	99	44	490	129	991	560	0	54	1	52	55	42	50	7	142	28	24	75	25	40	43	18	24	36	24	17	30	190	40	25	50	149	129	26
ENSG00000047346	8	12	7	2	0	0	3	11	0	16	41	37	15	50	1	3	12	31	10	55	24	21	5	0	1	2	3	0	14	12	15	8	5	1	0	2	0	6	2	8	5	3	16	6	7	1	11	6	6
ENSG00000047365	104	13	27	43	27	28	36	1	54	19	122	188	36	67	60	15	23	245	94	289	264	0	1	0	0	27	3	0	0	4	55	34	78	42	15	46	35	38	48	37	18	30	95	31	21	64	70	78	42
ENSG00000047410	521	55	71	176	71	132	172	213	314	94	472	799	203	978	84	61	127	578	747	1733	1018	18	19	76	44	282	117	77	33	331	115	126	223	81	102	139	96	114	80	99	91	127	397	158	72	203	276	251	147
ENSG00000047457	0	0	0	0	0	0	0	0	0	0	0	0	0	0	0	0	0	0	0	0	0	0	0	0	0	0	0	0	0	0	0	0	0	0	0	0	0	0	0	0	0	0	0	0	0	0	0	0	0
ENSG00000047578	6	0	0	0	0	0	2	0	0	0	0	13	6	5	0	0	0	0	9	31	7	0	0	0	0	7	0	3	2	0	0	0	0	0	7	0	0	0	1	2	0	2	2	5	2	0	8	7	0
ENSG00000047579	42	2	12	25	4	20	49	0	60	0	35	34	6	49	0	3	1	80	6	92	57	40	0	0	18	56	0	63	23	70	4	1	10	10	0	12	3	0	8	6	7	5	39	17	5	17	51	16	10
ENSG00000047597	11	8	14	7	18	16	15	20	4	73	43	38	59	60	15	19	30	36	60	38	42	39	28	24	31	40	36	22	41	18	11	20	7	7	11	1	7	5	10	4	10	2	18	7	5	15	9	24	3
ENSG00000047617	4	6	0	3	0	10	16	7	1	19	32	42	7	10	2	15	25	34	26	12	36	14	7	12	1	27	27	1	19	49	12	5	17	4	0	5	2	6	3	0	0	1	5	5	11	11	4	9	6
ENSG00000047621	16	4	0	0	1	20	7	0	10	9	10	75	0	30	4	0	10	1	2	114	126	0	0	0	0	1	84	0	0	30	17	5	5	0	9	2	8	0	2	1	0	0	12	2	0	2	19	15	8
ENSG00000047634	16	4	11	22	6	8	0	11	47	0	15	31	14	49	1	17	0	11	7	38	12	21	0	45	38	25	9	0	0	44	12	0	14	5	6	1	10	10	4	2	0	9	12	12	0	5	4	2	0
ENSG00000047644	33	3	0	14	6	9	18	6	25	12	10	21	5	37	0	11	15	20	32	23	23	2	8	1	0	10	41	1	1	22	1	15	13	10	4	7	3	3	14	16	7	9	6	7	4	6	20	8	3
ENSG00000047648	111	44	45	104	175	281	291	310	49	217	177	132	234	163	91	128	170	62	200	99	107	278	271	309	182	331	509	428	323	289	42	82	61	55	76	50	75	41	77	46	59	59	76	129	44	59	22	52	85
ENSG00000047662	0	0	0	0	0	0	0	0	0	0	0	0	0	0	0	0	0	0	0	0	0	0	0	0	0	0	0	0	0	0	0	0	1	0	0	0	0	0	0	0	0	0	0	0	0	0	0	0	0
ENSG00000047849	105	7	24	30	20	12	51	8	1	4	33	52	15	100	7	9	10	20	68	132	117	34	0	1	11	47	17	17	0	53	14	9	19	2	0	13	1	2	6	10	5	10	46	11	1	6	47	26	9
ENSG00000047932	7	0	0	3	2	4	3	4	10	2	7	20	0	20	2	0	1	11	1	60	16	0	0	0	0	0	0	0	0	15	2	2	4	1	0	2	3	0	3	1	1	5	14	1	0	4	7	5	2
ENSG00000047936	0	0	0	0	0	0	0	0	0	0	0	0	0	0	0	0	0	0	0	0	0	0	0	0	0	0	0	0	0	0	0	0	0	0	0	0	0	0	0	0	0	0	0	0	0	0	0	0	0
ENSG00000048028	11	34	15	5	0	4	4	0	114	0	14	336	3	85	6	2	13	104	62	377	365	0	0	1	0	96	0	0	0	24	19	1	8	24	1	5	2	13	3	2	11	9	54	10	3	16	43	58	10
ENSG00000048052	41	55	52	15	17	7	23	27	8	164	121	159	145	94	59	80	73	16	64	258	293	9	20	20	13	21	7	14	10	75	26	9	32	7	20	12	11	10	18	15	33	19	100	60	11	42	47	45	12
ENSG00000048140	0	0	0	0	0	0	1	0	0	0	0	0	1	5	0	0	0	6	0	13	0	0	0	0	0	0	0	0	0	2	1	0	0	0	0	1	0	0	2	0	0	0	1	0	0	0	2	0	1
ENSG00000048162	41	6	10	13	7	15	36	24	58	1	17	37	8	66	2	8	2	42	25	51	92	5	0	0	0	7	0	2	6	54	4	0	10	0	2	1	2	3	4	5	2	3	8	6	3	5	32	23	2
ENSG00000048342	1	0	0	0	0	0	0	0	0	0	0	19	0	0	0	0	0	15	0	35	0	0	0	0	0	0	0	0	0	0	0	0	0	0	0	0	0	0	0	0	0	0	0	0	0	8	0	9	0
ENSG00000048392	0	8	1	0	0	4	1	4	4	0	13	35	13	79	0	2	12	0	9	78	59	0	0	0	0	0	0	0	0	0	11	0	2	0	0	0	0	0	0	0	0	0	3	8	0	4	1	2	3
ENSG00000048405	10	4	6	3	5	8	6	18	1	3	23	21	7	8	4	0	5	20	4	28	12	0	1	0	2	15	0	2	21	3	6	5	5	2	1	4	5	0	4	9	4	4	11	5	3	9	3	3	1
ENSG00000048462	5	2	0	0	6	2	0	0	111	0	8	20	2	4	0	2	3	9	20	5	11	3	0	0	0	0	0	0	0	11	0	0	0	0	5	0	0	1	2	10	3	0	5	0	0	2	9	5	0
ENSG00000048471	127	38	43	59	59	56	84	85	41	25	68	100	40	178	24	32	34	170	142	143	86	25	20	35	18	178	69	88	90	156	23	22	29	20	38	23	32	15	46	32	16	51	99	41	27	37	96	48	66
ENSG00000048540	0	0	0	0	0	0	0	0	0	0	0	0	0	0	0	0	0	0	0	0	0	0	0	0	0	0	0	0	0	0	0	0	0	0	0	0	0	0	0	0	0	0	0	0	0	0	0	0	0
ENSG00000048544	53	30	7	22	16	40	47	54	111	51	110	178	25	195	5	24	17	102	97	255	275	78	35	23	69	36	119	117	38	82	10	18	3	8	9	12	17	12	17	7	19	22	104	21	15	33	41	78	6
ENSG00000048545	0	0	0	0	0	0	0	0	0	0	0	0	0	0	0	0	0	0	0	0	0	0	0	0	0	0	0	0	0	0	0	0	0	0	0	0	0	0	0	0	0	0	0	0	0	0	0	0	0
ENSG00000048649	312	110	104	198	166	132	231	258	225	263	357	326	205	307	106	116	157	441	386	410	286	145	307	202	219	539	416	316	166	198	100	112	146	111	148	93	108	46	105	86	108	115	190	111	69	110	105	122	137
ENSG00000048707	34	18	73	38	29	19	21	7	8	55	129	101	50	219	55	51	23	112	65	226	89	62	0	3	34	41	35	0	12	6	21	28	54	21	30	11	22	8	13	14	22	31	63	34	19	28	41	32	25
ENSG00000048740	131	280	406	115	54	134	173	172	127	1118	1026	1185	993	805	265	391	863	852	1099	1113	1282	504	545	377	407	692	720	597	463	592	299	151	184	160	93	100	222	82	270	130	194	184	387	297	180	272	264	322	220
ENSG00000048828	33	17	19	8	17	33	40	30	25	75	53	89	62	66	29	9	30	100	23	86	87	10	6	10	36	15	31	18	35	10	14	16	18	22	11	8	16	9	16	19	9	17	27	25	7	13	27	20	9
ENSG00000048991	86	62	32	33	32	53	54	36	32	133	120	250	161	193	27	47	44	220	210	243	200	142	4	10	140	18	2	12	96	76	67	30	23	16	14	37	12	37	40	45	25	30	52	34	17	42	49	45	24
ENSG00000049089	0	0	0	1	0	1	2	0	0	0	0	0	0	0	13	0	0	1	0	4	3	0	0	0	0	0	0	0	0	0	0	0	0	0	0	0	0	0	0	0	0	0	0	0	0	0	1	0	0
ENSG00000049130	0	11	2	0	11	1	0	13	0	22	18	6	10	1	2	4	7	40	5	0	4	0	0	0	24	0	0	0	0	0	0	3	10	1	7	0	9	2	3	0	3	0	0	3	0	4	2	8	0
ENSG00000049167	18	0	9	5	0	0	8	0	0	6	24	23	12	33	0	0	11	3	31	74	38	0	0	0	0	0	0	0	0	0	8	1	6	4	1	3	1	0	3	2	1	0	20	5	1	1	13	12	5
ENSG00000049192	2	3	0	0	0	0	0	0	0	0	5	7	11	9	1	14	2	0	56	18	12	0	0	0	0	0	0	2	0	21	4	4	0	1	0	0	0	0	7	1	0	2	2	3	0	1	1	1	0
ENSG00000049239	1	4	0	1	0	0	1	2	0	0	0	5	0	1	0	0	0	1	1	10	2	0	0	0	0	0	0	0	0	1	0	0	2	0	0	2	1	0	0	0	1	1	0	0	0	1	2	2	1
ENSG00000049245	28	4	15	14	3	23	12	24	6	39	31	90	45	53	11	28	18	65	31	134	94	81	19	15	29	49	26	88	24	48	16	11	7	1	6	4	7	1	12	8	3	12	21	20	2	10	19	23	4
ENSG00000049246	3	4	0	0	0	0	0	2	5	35	9	15	1	12	1	0	4	23	7	25	2	0	0	0	0	0	1	12	3	0	0	1	4	0	2	2	1	0	0	0	0	0	3	0	1	0	3	3	0
ENSG00000049247	1	6	6	37	0	10	3	0	16	0	0	2	0	2	0	6	2	0	5	2	0	0	0	0	0	0	0	0	0	47	0	0	0	0	0	4	0	0	0	2	0	0	0	15	0	0	2	3	0
ENSG00000049249	9	1	0	0	0	2	1	0	0	0	2	7	0	6	0	0	0	0	0	1	5	0	0	0	0	0	0	0	0	0	7	0	0	0	0	0	0	4	0	3	0	0	1	0	2	0	0	4	0
ENSG00000049283	0	0	0	0	0	0	0	0	0	0	0	0	0	0	0	0	0	0	0	0	0	0	0	0	0	0	0	0	0	0	0	0	0	0	0	0	0	0	0	0	0	0	0	0	0	0	0	0	0
ENSG00000049319	0	0	0	0	0	0	0	0	0	0	0	0	0	0	0	0	0	0	0	0	0	0	0	0	0	0	0	0	0	0	0	0	0	0	0	0	0	0	0	0	0	0	0	0	0	0	0	0	0
ENSG00000049323	204	958	1049	478	345	823	871	996	196	4450	2618	3475	4625	3975	1990	3293	2899	3083	2426	3383	4394	1390	963	1254	808	2070	3326	3184	2554	1482	1055	396	724	425	515	421	686	307	1007	252	741	425	1582	1397	649	531	224	536	672
ENSG00000049449	1	0	0	0	0	0	2	0	0	0	0	12	2	7	0	0	0	6	0	20	8	0	0	0	0	0	0	0	0	0	1	2	0	0	0	0	0	0	2	0	0	0	2	1	0	2	3	4	0
ENSG00000049540	0	0	0	0	0	1	0	0	0	0	0	0	0	0	1	1	0	0	0	0	0	0	0	0	0	0	0	0	0	0	0	0	0	0	0	0	0	0	0	0	0	0	0	0	0	0	0	0	0
ENSG00000049541	112	5	0	31	21	147	158	117	69	72	64	154	49	132	14	19	34	69	60	70	175	37	11	55	87	307	41	126	69	128	11	6	1	0	18	6	1	27	20	9	24	16	57	25	9	13	38	50	9
ENSG00000049618	5	20	5	3	3	6	7	0	61	28	16	40	5	54	4	9	4	14	21	89	23	0	0	1	1	2	0	0	13	1	7	2	4	1	8	3	6	4	2	2	6	1	7	11	6	5	6	9	8
ENSG00000049656	20	9	2	9	1	32	10	10	44	50	41	78	14	49	8	0	6	58	77	48	53	4	0	0	19	0	101	5	0	12	5	3	14	3	6	5	5	1	19	1	7	4	34	7	14	14	8	11	3
ENSG00000049759	8	15	0	0	4	2	2	0	0	54	18	15	44	9	22	17	1	0	0	7	17	0	0	0	0	0	6	62	0	0	15	0	1	1	0	2	0	0	0	5	10	2	9	5	2	0	4	5	8
ENSG00000049768	2	0	0	1	3	0	1	0	1	0	3	0	0	9	0	0	1	3	12	13	0	0	0	0	0	1	0	0	0	1	2	0	1	1	0	0	0	0	1	0	4	2	0	0	0	0	0	0	0
ENSG00000049769	0	0	0	0	0	2	3	0	0	0	0	0	0	3	0	2	0	16	5	4	2	0	0	16	0	0	0	0	7	1	2	4	0	2	0	0	0	0	1	5	0	2	0	0	0	1	3	0	2
ENSG00000049860	158	46	69	14	18	92	180	0	67	0	62	160	18	226	4	10	1	62	44	472	325	0	20	42	0	46	33	0	16	209	72	11	4	7	34	4	17	6	11	1	6	16	111	13	11	10	57	162	16
ENSG00000049883	3	6	0	0	0	0	0	0	0	0	12	12	0	27	0	0	0	23	1	27	40	0	0	0	0	24	0	0	0	0	8	2	0	0	0	3	0	3	3	2	0	0	4	1	0	0	3	8	0
ENSG00000050030	0	0	0	0	0	0	0	0	0	0	0	0	0	0	0	0	0	0	0	0	0	0	0	0	0	0	0	0	0	0	0	0	0	0	0	0	0	0	0	0	0	0	0	0	0	0	0	0	0
ENSG00000050130	84	52	98	74	26	97	81	50	135	356	221	356	179	279	76	96	90	647	155	335	518	191	41	76	11	171	136	141	115	298	77	52	29	21	35	29	35	40	41	10	57	17	100	40	17	48	121	54	46
ENSG00000050165	0	0	0	0	0	0	0	0	0	0	0	0	0	0	0	0	0	0	0	0	0	0	0	0	0	0	0	0	0	3	0	0	0	0	0	0	0	0	0	0	0	0	0	0	0	0	0	0	0
ENSG00000050327	0	0	0	0	0	0	0	0	0	0	0	0	0	0	0	0	0	0	0	0	2	0	0	0	0	0	0	0	0	0	0	0	0	0	0	0	0	0	0	0	0	0	2	0	0	0	0	0	0
ENSG00000050344	1	0	0	0	0	0	1	0	0	0	0	0	0	0	0	0	0	0	0	0	3	0	0	0	0	1	0	0	0	0	0	0	2	0	0	0	0	0	0	0	1	0	1	0	0	0	0	2	0
ENSG00000050393	185	231	280	537	248	898	783	582	673	1375	937	392	950	820	229	409	790	603	907	528	437	817	1332	950	564	1372	2147	1936	1563	1393	218	313	145	205	388	134	255	149	340	152	249	220	186	519	170	195	108	156	290
ENSG00000050405	1	3	9	0	1	6	11	20	19	0	12	40	5	59	0	10	10	13	14	58	44	1	0	0	2	0	71	2	4	41	8	0	7	6	0	3	7	1	3	0	0	0	6	8	4	6	16	5	2
ENSG00000050426	26	11	4	14	5	31	22	40	7	21	41	44	21	130	6	19	13	13	39	160	143	31	36	15	12	34	24	108	11	33	21	6	3	2	2	5	14	2	9	1	3	5	32	14	4	4	17	34	3
ENSG00000050438	4	0	8	0	0	2	0	0	0	0	1	10	0	19	2	0	1	4	0	0	1	0	0	2	0	0	0	0	0	1	12	0	0	1	1	1	0	0	0	0	0	3	1	0	0	5	3	4	0
ENSG00000050555	0	0	0	0	0	0	0	0	0	0	3	0	0	0	0	0	0	0	0	5	17	0	0	0	0	0	0	0	0	0	0	0	0	0	0	0	0	0	0	0	0	0	0	0	0	0	3	0	0
ENSG00000050628	0	5	0	0	0	1	1	1	0	0	0	0	0	0	0	0	1	1	0	0	0	0	0	14	0	0	0	0	0	0	0	0	0	0	0	0	0	0	0	0	4	0	0	1	0	0	0	2	0
ENSG00000050730	1	0	1	0	2	0	9	0	0	6	0	4	0	2	0	0	0	6	4	8	19	0	0	2	0	0	13	34	0	3	0	0	0	0	2	0	0	0	0	0	4	0	0	0	0	4	5	5	4
ENSG00000050748	5	1	0	7	0	5	9	10	3	21	13	29	9	14	0	2	7	22	7	29	21	9	0	0	1	0	46	0	2	0	9	1	7	0	6	3	1	3	7	1	0	0	5	15	0	2	6	9	3
ENSG00000050767	0	0	0	0	0	0	1	0	0	1	0	0	0	0	0	0	0	0	0	1	0	0	0	0	0	0	0	0	0	0	0	0	0	0	0	0	1	0	0	0	0	0	0	0	0	1	0	0	0
ENSG00000050820	0	0	0	0	0	0	0	0	0	0	0	0	0	0	0	0	0	0	0	0	0	0	0	0	0	0	0	0	0	0	0	0	0	0	0	0	0	0	0	0	0	0	0	0	0	0	0	0	0
ENSG00000051009	2	3	0	0	1	8	0	6	3	1	8	42	4	35	6	0	2	8	17	87	31	0	0	0	0	0	0	3	4	13	4	3	11	0	0	2	3	3	0	5	2	7	12	3	1	4	14	19	1
ENSG00000051108	254	69	27	40	51	138	212	55	327	34	68	281	21	332	20	10	23	25	56	560	349	0	14	0	36	59	49	73	44	272	36	21	18	10	17	11	14	0	17	22	7	17	115	22	2	32	127	126	15
ENSG00000051128	1	0	0	0	0	1	0	0	0	0	0	0	0	0	0	0	0	0	0	0	0	0	0	0	0	0	0	0	0	0	0	0	0	0	0	0	0	0	0	0	0	0	0	0	0	0	0	3	0
ENSG00000051180	0	0	0	0	0	0	2	0	0	0	3	0	0	0	1	0	0	0	0	0	0	0	0	0	0	0	0	0	0	7	0	0	0	0	0	0	0	0	0	1	5	0	0	0	0	1	1	0	1
ENSG00000051341	0	0	0	0	0	0	0	0	0	0	11	20	1	3	0	13	6	0	0	1	1	0	0	0	0	0	0	0	0	0	0	1	0	0	0	0	0	0	3	0	4	1	0	0	0	0	0	0	1
ENSG00000051382	83	152	234	73	30	80	68	50	65	863	750	385	617	344	152	254	256	339	433	583	377	103	126	135	55	50	270	172	229	62	133	89	52	65	69	41	94	38	93	28	55	41	90	114	47	65	45	45	91
ENSG00000051523	130	41	24	63	66	244	165	8	183	4	55	202	24	194	13	14	18	61	38	366	226	2	26	8	24	239	45	34	20	147	47	31	19	31	11	29	18	12	17	36	35	39	161	28	16	37	252	231	31
ENSG00000051596	0	0	0	3	1	3	5	4	5	2	14	17	2	11	0	0	1	16	1	10	15	3	0	5	3	2	3	12	5	10	1	1	0	1	0	0	0	3	1	3	0	4	3	1	0	2	2	4	0
ENSG00000051620	10	2	0	2	1	6	14	1	11	0	5	22	3	3	0	0	3	4	8	12	5	0	0	0	0	0	0	1	0	3	0	6	2	3	3	2	0	1	2	1	8	0	20	2	2	4	9	1	1
ENSG00000051825	27	44	8	5	9	26	14	3	5	51	88	123	10	195	2	15	25	92	33	293	242	7	0	27	3	0	24	0	0	80	7	23	13	19	30	16	31	16	4	7	3	11	33	48	12	11	16	49	10
ENSG00000052126	18	19	18	3	22	39	8	32	8	40	51	15	47	67	10	15	22	25	0	39	38	15	11	65	3	52	88	57	54	51	14	9	11	9	2	19	9	5	14	2	5	11	14	15	13	5	10	7	7
ENSG00000052344	0	0	0	0	0	0	0	0	0	0	0	0	0	0	0	0	0	0	0	0	0	0	0	0	0	0	0	0	0	0	0	0	0	0	0	0	0	0	0	0	0	0	0	0	0	0	0	0	0
ENSG00000052723	29	3	0	0	1	12	17	15	75	5	24	16	1	32	3	0	1	5	12	54	22	0	0	0	3	0	15	10	1	15	2	6	13	0	0	1	4	2	4	3	6	2	11	1	6	1	24	8	3
ENSG00000052749	35	18	14	0	5	4	14	1	25	8	9	62	1	52	3	1	4	16	35	59	113	0	45	0	0	0	0	0	0	17	14	8	4	6	8	4	8	1	2	9	2	2	23	3	3	13	19	16	3
ENSG00000052795	1	1	1	0	0	1	0	0	2	0	0	1	3	11	6	1	1	1	16	20	10	0	0	0	0	0	0	0	0	2	0	0	0	0	2	0	0	0	2	0	1	0	2	0	0	1	2	7	1
ENSG00000052802	1	1	0	0	1	0	1	1	1	12	21	99	5	81	4	0	0	9	0	130	78	0	0	0	28	16	19	18	0	21	3	1	5	1	0	1	3	5	2	2	0	0	14	0	0	3	22	24	4
ENSG00000052841	79	39	68	43	5	19	14	9	46	38	146	372	144	655	11	35	12	227	49	923	778	15	4	12	8	27	2	93	16	70	88	24	16	20	24	29	10	17	25	34	12	24	128	39	15	66	150	191	30
ENSG00000052850	0	0	0	0	0	0	0	0	0	0	0	0	0	0	0	0	0	0	0	0	0	0	0	0	0	0	0	0	0	0	0	0	0	0	0	0	0	0	0	0	0	0	0	0	0	0	0	0	0
ENSG00000053108	25	34	46	17	54	36	35	5	20	235	109	90	111	108	20	61	68	85	87	92	166	77	113	24	108	66	183	173	129	137	19	8	21	12	15	8	36	4	19	17	13	6	53	16	15	6	11	23	8
ENSG00000053254	6	12	0	2	2	8	21	12	3	4	21	37	30	29	2	7	10	25	14	59	61	2	4	0	1	6	2	11	3	11	6	2	1	2	1	2	1	4	2	2	4	1	16	0	1	4	4	5	1
ENSG00000053328	0	0	0	0	0	0	0	0	0	0	0	0	0	0	0	0	0	0	0	0	0	0	0	0	0	0	0	0	0	0	0	0	0	0	0	0	1	0	0	0	0	0	0	0	0	0	0	1	0
ENSG00000053371	14	11	12	3	0	16	71	78	4	20	31	16	24	81	14	9	34	46	18	28	25	24	3	14	19	7	10	15	3	23	3	13	17	6	0	4	10	0	1	4	2	0	4	43	5	7	7	20	4
ENSG00000053372	31	9	14	11	7	28	19	0	3	7	14	46	3	39	0	0	6	35	45	44	77	26	24	22	0	147	36	45	16	50	4	4	0	5	7	7	5	4	1	1	4	4	25	2	3	6	18	21	4
ENSG00000053438	0	0	0	0	0	0	0	0	0	0	0	0	0	0	0	0	0	0	0	0	0	0	0	0	0	0	0	0	0	0	0	0	0	0	0	0	0	0	0	0	0	0	0	0	0	0	0	0	0
ENSG00000053501	23	9	1	58	6	15	48	8	43	0	37	59	11	103	7	4	1	28	13	88	95	0	16	42	0	72	0	26	0	66	9	13	11	9	2	16	7	10	17	6	3	3	23	3	1	21	36	27	3
ENSG00000053524	0	0	2	0	0	0	0	1	0	0	2	1	0	5	2	1	0	8	0	1	1	0	0	0	0	0	0	0	0	0	0	4	1	0	3	0	1	2	0	2	0	1	1	3	1	4	1	3	1
ENSG00000053702	0	0	3	0	0	0	0	0	0	0	0	1	0	0	0	0	0	1	0	0	0	0	0	0	0	0	0	0	0	0	0	0	0	0	0	0	0	0	0	0	0	0	0	0	0	0	0	0	0
ENSG00000053747	0	0	0	0	0	1	0	0	0	0	0	14	0	0	1	1	0	0	0	0	0	0	0	0	0	0	0	0	0	0	0	0	0	0	0	0	0	0	0	0	0	0	0	0	0	0	0	0	0
ENSG00000053770	10	36	46	16	10	9	2	5	14	116	108	218	46	165	46	43	73	144	64	305	273	11	16	8	28	4	137	85	34	56	15	12	7	11	0	9	19	5	20	6	27	3	41	36	7	14	27	52	17
ENSG00000053900	54	70	31	7	1	3	18	27	12	0	81	279	6	188	24	2	35	43	74	344	361	65	1	0	0	53	3	43	0	106	30	12	28	13	33	15	26	11	4	27	9	20	116	47	2	32	91	59	7
ENSG00000053918	3	0	5	1	0	2	1	0	0	0	0	0	2	2	4	0	0	1	0	0	0	0	0	0	0	0	0	0	0	0	0	1	11	0	0	2	0	0	0	0	0	6	2	1	3	0	2	0	4
ENSG00000054116	140	10	15	22	22	60	58	18	44	17	27	38	16	51	0	6	12	43	15	69	69	1	39	40	10	58	126	50	97	159	12	7	27	5	4	5	0	5	8	11	5	3	20	0	1	10	48	13	13
ENSG00000054118	317	38	33	144	50	167	191	132	254	44	124	394	92	265	28	45	57	151	76	320	451	50	42	62	100	241	307	198	74	331	42	28	49	35	21	28	28	12	42	32	54	41	200	67	18	50	144	162	37
ENSG00000054148	50	11	4	9	15	34	43	7	33	13	44	60	9	43	3	3	0	80	21	78	116	13	2	10	7	25	33	15	11	42	11	9	10	5	11	5	6	4	13	4	6	7	27	13	7	6	29	42	9
ENSG00000054179	0	0	0	0	0	0	0	0	0	0	0	0	0	0	0	0	0	0	0	0	0	0	0	0	0	0	0	0	0	0	0	0	0	0	0	0	0	0	0	0	0	0	0	0	0	0	0	0	0
ENSG00000054219	0	0	0	0	0	0	0	0	0	0	0	0	0	0	1	0	0	0	0	0	0	0	0	0	0	0	0	0	0	0	0	0	0	0	1	0	0	0	0	0	0	0	1	0	0	0	0	0	0
ENSG00000054267	554	142	160	325	119	273	197	198	527	168	489	458	214	628	110	104	111	699	365	811	429	150	94	131	81	255	246	232	287	624	100	124	193	84	124	82	68	109	76	86	78	125	292	85	61	188	305	191	134
ENSG00000054277	3	0	0	0	0	0	1	0	0	1	0	4	0	1	0	0	0	2	2	5	2	0	0	0	0	6	0	0	3	1	0	0	0	0	0	0	0	0	2	0	2	1	0	0	1	0	0	1	2
ENSG00000054282	272	87	81	265	109	215	226	432	70	300	402	304	357	287	97	92	116	270	427	353	298	407	128	282	224	273	267	205	191	355	66	84	65	48	69	65	118	78	35	39	81	63	109	93	36	117	126	93	83
ENSG00000054356	7	8	1	19	12	50	121	115	19	43	37	37	33	35	17	20	53	18	51	16	3	100	112	120	71	41	239	160	200	64	6	8	11	4	1	2	16	3	14	5	14	4	7	20	10	16	2	8	8
ENSG00000054392	4	0	0	5	0	0	1	0	0	0	0	1	0	2	0	0	0	0	0	8	0	0	0	0	0	0	0	0	0	0	2	0	0	0	0	1	2	0	0	0	0	2	1	0	0	0	1	0	0
ENSG00000054523	7	7	13	12	6	5	12	1	1	42	29	24	2	20	12	13	28	0	3	19	13	2	0	1	0	2	1	0	7	9	30	6	6	3	8	12	5	7	16	15	9	13	12	3	7	10	13	5	15
ENSG00000054598	0	0	0	0	0	0	0	0	0	0	0	0	0	0	0	0	0	0	0	0	0	0	0	0	0	0	0	0	0	0	0	0	0	0	0	0	0	0	0	0	0	0	0	0	0	0	0	0	0
ENSG00000054611	26	2	1	14	14	25	45	3	13	14	18	34	29	42	24	5	19	13	3	2	15	87	9	2	31	3	58	99	11	75	11	16	7	5	15	5	5	4	14	12	8	13	22	7	1	13	23	14	23
ENSG00000054654	182	88	62	134	81	71	58	124	285	34	321	735	117	986	139	121	101	774	651	1581	710	41	55	2	0	105	29	39	9	121	155	140	332	119	97	181	139	125	139	86	83	183	341	242	44	293	264	233	147
ENSG00000054690	0	0	0	0	0	0	0	0	0	0	0	0	0	0	0	0	0	0	0	0	0	0	0	0	0	0	0	0	0	0	0	0	0	0	0	0	0	0	0	0	0	0	0	0	0	0	0	0	0
ENSG00000054793	1	7	2	12	8	10	15	16	4	36	17	29	30	22	3	9	16	10	26	21	17	26	4	17	22	8	24	16	11	14	3	3	0	6	1	1	6	4	3	6	1	0	7	8	0	8	6	4	3
ENSG00000054796	0	0	0	0	0	0	0	0	0	0	0	0	0	0	0	0	0	0	0	0	0	0	0	0	0	0	0	0	0	0	0	0	0	0	0	0	0	0	0	0	0	0	0	0	0	0	0	0	0
ENSG00000054803	0	0	0	0	0	0	0	0	0	0	0	0	0	0	0	0	0	0	0	0	0	0	0	0	0	0	0	0	0	0	0	0	0	0	0	0	0	0	0	0	0	0	0	0	0	0	0	0	0
ENSG00000054938	0	0	0	0	0	0	0	0	0	0	0	0	0	0	0	0	0	0	0	0	0	0	0	0	0	0	0	0	0	0	0	0	0	0	0	0	0	0	0	0	0	0	0	1	0	0	0	0	0
ENSG00000054965	0	0	0	0	0	2	0	1	0	0	1	5	0	1	0	0	0	6	1	9	6	0	0	3	0	0	0	1	0	0	0	0	1	1	1	1	1	0	0	0	0	2	2	1	0	1	1	0	1
ENSG00000054967	6	0	1	1	2	2	12	15	4	0	1	2	0	4	1	0	0	1	9	7	4	0	1	0	0	0	7	0	0	2	0	0	0	0	0	1	1	1	2	5	0	1	1	0	0	1	4	2	4
ENSG00000054983	15	45	16	1	4	4	1	10	21	0	45	67	30	70	7	0	11	19	8	153	74	1	8	0	0	0	48	0	0	4	7	1	1	5	5	1	0	4	0	3	1	1	14	7	3	8	13	31	3
ENSG00000055044	298	70	74	273	71	115	180	51	183	52	368	701	106	691	65	36	59	570	203	771	735	6	7	8	31	68	153	114	112	697	88	65	53	43	26	66	61	36	47	44	47	67	214	56	52	114	162	205	78
ENSG00000055070	15	13	20	12	12	49	42	60	10	23	36	44	33	31	12	14	13	31	22	41	64	49	71	86	41	64	68	87	43	103	7	7	11	12	0	7	17	3	20	6	9	6	28	17	10	7	14	16	16
ENSG00000055118	1	0	0	0	0	0	0	0	0	0	0	0	0	0	0	0	0	0	0	0	0	0	0	0	0	0	0	0	0	0	0	0	0	0	0	0	0	0	0	0	0	0	1	0	0	0	0	0	0
ENSG00000055130	38	50	33	9	15	40	27	2	7	2	194	345	100	449	19	86	61	141	156	547	317	21	38	70	22	74	19	65	52	109	56	3	36	3	14	17	3	33	22	14	14	10	85	43	2	35	103	98	10
ENSG00000055147	23	14	0	23	6	0	11	1	2	40	70	130	11	107	0	28	8	43	15	153	165	38	29	0	30	30	56	0	32	39	12	10	7	0	5	0	13	7	3	4	3	0	22	5	0	0	23	35	9
ENSG00000055163	96	36	64	35	57	94	73	119	13	115	624	1067	147	1257	118	103	76	684	224	1622	1428	6	3	33	1	70	18	47	44	133	161	41	75	42	18	42	57	45	49	44	37	35	328	106	23	85	269	354	58
ENSG00000055208	11	35	50	14	11	28	10	12	5	128	142	113	120	183	47	77	91	125	80	82	94	24	14	2	16	9	44	40	10	31	54	45	41	27	16	15	29	30	33	14	16	15	33	31	15	20	22	34	22
ENSG00000055211	89	7	5	37	20	99	59	37	32	24	34	58	18	89	7	10	11	38	1	139	68	86	51	20	33	2	139	53	112	79	10	2	6	6	26	6	2	6	13	3	10	15	18	17	2	13	19	28	8
ENSG00000055332	58	29	0	47	26	37	26	4	11	1	124	96	39	137	3	20	22	57	72	269	309	0	58	0	9	14	0	23	3	52	51	10	39	8	9	10	24	21	14	27	9	28	52	20	8	25	63	39	32
ENSG00000055483	5	13	10	2	5	5	9	1	67	6	20	57	4	102	31	2	3	81	12	101	88	0	0	0	0	5	12	0	26	20	8	9	13	9	0	7	5	12	12	4	5	3	41	9	6	19	33	23	5
ENSG00000055609	150	118	170	105	66	159	107	210	175	422	318	507	423	391	295	324	186	457	414	690	528	173	46	99	70	84	104	189	95	110	122	119	188	84	101	85	69	55	121	84	99	124	209	162	71	122	83	151	134
ENSG00000055732	0	0	12	0	0	0	0	0	0	0	0	0	0	0	0	0	0	1	1	1	0	0	0	0	0	0	7	0	0	0	0	0	0	0	0	0	0	0	0	0	0	0	0	2	0	0	1	0	0
ENSG00000055813	0	0	0	0	0	0	0	0	0	0	0	0	0	0	0	0	0	0	0	0	0	0	0	0	0	0	0	0	0	0	0	0	0	0	0	0	0	0	0	0	0	0	0	0	0	0	0	0	0
ENSG00000055917	20	41	25	6	2	5	7	5	19	87	158	243	61	298	13	45	79	182	84	497	411	0	0	2	0	63	19	42	33	26	33	13	33	20	0	7	16	14	15	6	19	13	40	15	20	28	29	76	13
ENSG00000055950	16	8	0	10	4	7	20	1	26	5	9	16	8	32	1	1	3	11	18	30	47	5	2	3	7	0	6	7	6	28	7	3	10	3	0	1	1	0	0	7	3	5	3	5	0	1	8	11	3
ENSG00000055955	0	0	0	0	0	0	0	0	0	0	0	0	0	0	0	0	0	0	0	0	0	0	0	0	0	0	0	0	0	0	0	0	0	0	0	0	0	0	0	0	0	0	0	0	0	0	0	0	0
ENSG00000055957	0	12	0	0	0	0	0	0	0	0	0	0	1	1	0	0	0	1	0	1	0	0	0	0	0	0	0	0	0	0	0	0	0	0	0	0	0	0	0	0	0	0	0	0	0	0	0	0	0
ENSG00000056050	75	15	31	37	15	39	19	0	164	12	62	28	13	71	1	2	11	41	14	122	80	9	4	0	0	22	49	34	0	63	7	17	16	0	9	11	14	4	9	1	1	9	20	7	16	20	39	40	3
ENSG00000056097	232	98	144	141	85	170	184	138	63	173	369	614	270	575	42	148	131	222	118	895	774	175	174	201	52	320	356	269	380	310	118	50	71	48	32	44	61	49	78	25	92	76	268	145	51	72	175	201	99
ENSG00000056277	1	0	8	20	1	14	0	0	0	1	9	16	0	29	0	0	3	1	1	26	13	0	0	0	0	0	0	0	0	0	2	2	13	3	1	0	0	0	6	1	0	2	3	2	0	1	0	3	0
ENSG00000056291	0	0	0	0	0	0	0	0	0	0	0	0	0	0	0	0	0	0	0	0	0	0	0	0	0	0	0	0	0	0	0	0	0	0	0	0	0	0	0	0	0	0	0	0	0	0	0	0	0
ENSG00000056487	0	0	0	0	0	0	0	0	0	0	0	0	0	0	0	0	0	0	0	0	0	0	0	0	0	0	0	0	0	0	0	0	0	0	0	0	0	0	0	0	0	0	0	0	0	0	0	0	0
ENSG00000056558	5	0	0	1	0	0	1	0	2	1	0	13	0	37	2	3	4	14	12	47	27	0	0	0	0	0	0	4	0	8	0	1	5	0	1	0	6	1	1	1	1	5	6	5	2	8	4	7	1
ENSG00000056586	32	38	36	26	26	35	49	86	66	163	181	201	191	126	150	114	155	248	194	166	144	8	10	88	12	20	71	15	31	116	32	41	36	46	20	32	45	19	55	24	20	59	21	88	32	23	33	3	35
ENSG00000056661	0	0	0	0	0	0	0	2	0	8	0	0	0	0	0	0	0	0	0	0	0	0	0	0	0	0	0	0	0	0	0	1	0	0	0	0	0	0	0	0	0	3	0	0	0	0	0	0	0
ENSG00000056736	0	0	0	0	0	0	0	0	0	0	0	0	0	0	0	0	0	0	0	0	0	0	0	0	0	0	0	0	0	0	0	0	0	0	0	0	0	0	0	0	0	0	0	0	0	0	0	0	0
ENSG00000056972	3	1	0	1	1	0	0	0	0	0	11	27	7	39	1	2	0	1	1	30	56	0	0	0	0	0	0	0	0	21	4	0	20	0	6	4	0	0	0	0	5	0	11	0	1	13	12	7	0
ENSG00000056998	0	0	0	0	0	0	0	0	0	0	0	0	0	0	0	0	0	0	0	0	0	0	0	0	0	0	0	0	0	0	0	0	0	0	0	0	0	0	0	0	0	0	0	0	0	0	0	0	0
ENSG00000057019	0	0	0	0	0	0	0	0	0	0	0	1	1	2	0	0	0	0	0	0	0	0	0	0	0	0	0	0	0	0	0	0	0	4	2	0	0	0	0	0	0	0	0	0	0	0	0	0	0
ENSG00000057149	0	0	0	0	0	0	0	0	0	0	0	0	0	0	0	0	0	0	0	0	0	0	0	0	0	0	0	0	0	0	0	0	0	0	0	0	0	0	0	0	0	0	0	0	0	0	0	0	0
ENSG00000057252	14	18	2	8	6	1	13	18	31	20	15	308	29	217	12	4	12	5	16	401	355	1	0	2	4	36	0	14	43	6	30	6	18	3	2	8	21	0	5	10	3	7	26	4	10	10	34	52	9
ENSG00000057294	0	3	0	14	0	8	10	25	0	29	23	1	49	7	5	24	7	11	12	18	3	0	18	5	19	1	34	40	5	5	1	0	1	0	0	3	8	2	4	1	6	6	1	2	2	0	2	2	5
ENSG00000057468	0	0	0	0	0	0	0	0	0	0	0	0	0	0	0	0	0	0	0	1	0	0	0	0	0	0	0	0	0	0	0	0	0	0	0	0	0	0	1	0	0	0	0	0	0	0	4	0	0
ENSG00000057593	0	0	0	0	0	0	0	0	0	0	0	0	0	0	0	0	0	0	0	0	1	0	0	0	0	0	0	0	0	0	0	0	0	0	0	0	0	0	0	0	0	0	0	0	0	0	0	0	0
ENSG00000057608	159	229	230	79	30	91	130	12	205	229	543	1541	217	1762	52	165	163	288	337	2809	2224	181	195	298	105	638	339	270	213	983	294	59	129	54	31	37	54	56	50	31	61	37	381	115	32	83	411	531	40
ENSG00000057657	5	3	0	3	3	4	0	11	3	0	1	14	4	10	0	0	1	3	4	28	7	0	0	0	0	0	0	2	0	0	0	0	4	0	0	0	0	0	1	1	0	0	8	0	1	2	2	1	2
ENSG00000057663	61	11	14	35	12	31	70	4	66	37	34	121	25	135	4	10	20	44	45	191	134	22	32	0	0	66	25	30	64	71	27	2	20	0	10	6	1	4	9	5	17	7	20	18	0	14	37	61	4
ENSG00000057704	1	2	0	0	0	1	0	0	0	0	1	1	0	1	0	0	0	0	0	4	1	0	0	0	0	0	0	0	0	0	0	0	0	1	0	0	0	1	0	0	3	2	0	0	0	0	5	0	0
ENSG00000057757	6	4	1	4	5	23	15	5	22	13	6	5	1	27	11	0	16	7	10	32	14	5	22	0	0	1	5	50	43	24	6	3	3	7	6	0	7	1	6	4	5	5	6	6	0	7	7	14	1
ENSG00000057935	63	7	10	20	1	6	5	0	0	12	22	33	8	40	1	0	1	40	21	67	48	0	0	0	0	25	0	0	0	16	2	16	4	7	24	1	5	0	4	5	2	2	9	1	5	2	7	16	0
ENSG00000058056	0	4	0	5	0	2	0	0	0	0	0	8	0	12	10	0	3	23	45	1	7	0	0	0	0	0	0	0	2	0	0	4	4	2	0	4	0	0	0	4	0	1	12	2	1	0	0	1	2
ENSG00000058063	44	31	4	11	32	33	30	40	12	50	82	69	30	96	15	103	36	159	122	164	108	17	14	2	9	3	22	0	1	32	58	38	69	19	8	31	41	17	12	17	24	30	49	30	27	18	20	43	21
ENSG00000058085	1	0	0	0	0	0	0	0	0	0	0	0	0	0	0	0	0	0	0	0	0	0	0	0	0	0	0	0	0	0	0	1	0	0	0	0	0	0	0	0	0	1	0	0	0	0	1	2	0
ENSG00000058091	14	16	4	0	9	20	4	7	2	28	19	16	53	42	20	9	25	47	40	57	31	6	2	1	6	66	41	0	22	1	27	9	11	8	10	13	6	3	30	4	10	6	13	24	3	4	13	17	9
ENSG00000058262	20	19	12	2	1	21	13	32	6	25	57	63	39	138	8	10	16	40	1	201	142	1	1	0	44	17	31	40	6	10	3	5	10	5	7	2	10	3	3	3	9	4	57	20	4	11	27	47	6
ENSG00000058272	358	194	367	309	132	255	199	241	504	1109	930	1503	544	1322	467	486	409	1119	766	1526	1500	305	557	443	330	743	966	873	807	830	240	187	259	163	107	126	149	155	182	138	159	167	598	266	147	149	464	376	229
ENSG00000058335	0	4	0	0	0	4	0	0	0	0	0	0	0	0	0	0	0	0	0	0	0	0	0	0	0	0	0	0	0	0	0	0	0	0	0	0	0	1	0	0	0	0	0	0	0	0	0	1	0
ENSG00000058404	0	0	0	0	0	0	0	0	0	0	0	0	0	0	0	0	0	0	0	0	0	0	0	0	0	0	0	0	0	0	0	0	0	0	0	0	0	0	0	0	0	0	0	0	0	0	0	0	0
ENSG00000058453	2	0	0	0	0	0	1	0	0	0	0	0	0	0	0	0	2	0	0	3	0	0	0	0	0	0	0	0	0	0	1	0	7	0	0	0	0	0	0	1	0	1	2	0	0	3	0	2	1
ENSG00000058600	5	3	1	0	5	3	6	0	17	9	5	24	0	54	0	1	0	11	7	143	67	0	0	17	10	7	0	5	0	55	5	0	8	3	0	0	1	3	3	0	1	4	10	3	3	6	12	11	3
ENSG00000058668	10	3	9	6	0	8	9	2	17	0	21	76	13	55	3	1	3	14	16	126	121	0	0	0	0	16	8	0	0	8	3	7	8	3	8	8	7	13	3	9	7	6	25	23	8	16	9	23	5
ENSG00000058673	62	99	75	72	16	61	28	104	7	609	432	492	292	712	89	262	134	363	324	864	817	98	3	42	6	45	70	21	107	43	184	62	65	41	37	46	45	35	62	39	62	39	152	90	24	75	97	113	67
ENSG00000058729	24	11	0	18	1	11	9	3	152	18	54	80	7	133	0	17	2	12	6	232	173	25	40	0	16	0	22	13	23	38	9	6	25	2	4	13	6	6	0	10	0	5	30	10	10	19	33	25	8
ENSG00000058799	98	29	0	4	12	23	44	73	1	18	48	100	34	80	0	26	20	13	30	146	235	54	0	0	0	41	87	0	6	31	4	9	14	13	6	6	8	8	13	5	3	4	46	10	5	11	39	53	2
ENSG00000058804	6	6	14	0	0	9	2	4	5	0	37	70	27	64	2	0	0	7	0	92	94	0	1	0	0	0	0	0	1	12	0	2	6	2	0	6	1	5	2	8	0	4	24	1	2	8	13	12	4
ENSG00000058866	21	42	52	26	24	30	35	71	0	468	123	93	153	154	69	212	97	101	38	106	174	7	23	6	6	50	158	144	131	95	49	13	16	36	9	15	39	5	30	6	17	17	49	62	31	21	14	24	29
ENSG00000059122	0	0	0	2	0	0	1	0	0	0	0	1	1	2	2	0	0	1	0	1	1	0	0	0	0	0	0	0	0	2	0	1	0	0	3	1	0	0	0	0	0	0	7	0	0	0	1	1	1
ENSG00000059145	1	0	3	4	1	3	0	7	0	0	8	2	3	16	4	0	4	0	5	4	1	9	4	17	0	4	39	5	0	9	0	1	0	2	0	0	3	1	1	0	4	0	3	0	1	4	2	4	2
ENSG00000059377	345	237	242	165	112	446	470	559	115	980	722	828	723	823	162	330	403	637	694	983	1213	398	435	279	206	571	519	722	512	1368	242	87	160	62	102	76	123	45	113	48	213	66	309	198	81	121	275	226	115
ENSG00000059378	3	8	0	7	0	1	6	0	0	0	9	17	1	22	12	0	0	38	31	32	14	0	0	0	0	4	25	12	0	0	5	0	5	2	1	2	8	2	9	3	3	2	15	0	1	4	19	10	5
ENSG00000059573	3	0	0	2	0	1	2	0	0	25	41	94	2	172	0	0	1	29	1	163	199	0	0	0	0	3	0	1	0	25	12	0	4	0	0	4	4	0	0	0	1	1	34	2	0	13	40	26	6
ENSG00000059588	5	15	1	19	1	11	8	5	2	6	60	28	37	100	30	0	2	107	31	122	41	0	0	0	0	5	0	0	0	1	8	3	12	6	12	4	2	5	4	8	4	12	31	16	1	13	46	25	4
ENSG00000059691	9	12	1	16	0	3	8	0	0	1	38	16	12	34	0	1	8	26	35	74	115	8	0	0	0	1	0	0	0	75	0	2	4	0	4	2	4	3	2	0	0	3	14	1	5	0	7	22	0
ENSG00000059728	84	25	7	34	16	56	25	6	7	46	26	39	17	42	6	18	20	30	12	30	23	8	22	2	5	15	30	18	63	20	16	7	10	5	18	6	10	1	10	3	15	15	25	8	3	5	19	7	30
ENSG00000059758	22	28	79	18	14	12	18	31	62	106	53	124	43	154	9	48	30	83	95	132	71	2	66	1	8	3	5	4	38	40	20	21	28	15	7	15	17	4	12	11	16	10	48	29	3	19	35	18	8
ENSG00000059769	1	0	0	7	4	3	0	0	0	0	0	0	0	1	0	0	3	3	6	5	3	0	0	0	0	6	0	0	0	0	0	0	1	0	0	1	2	2	1	3	0	3	0	0	0	0	2	2	0
ENSG00000059804	88	251	298	98	54	175	96	118	89	1423	822	1081	1114	746	248	711	600	709	550	946	980	174	234	150	112	185	358	344	266	283	386	115	153	142	86	98	159	98	299	48	208	133	486	251	128	188	176	149	148
ENSG00000059915	0	0	0	0	0	0	0	0	0	0	0	0	0	0	0	0	0	0	0	0	0	0	0	0	0	0	0	0	0	0	0	0	0	0	0	0	0	0	0	0	0	0	0	0	0	0	0	0	0
ENSG00000060069	3	0	0	0	2	0	1	0	0	0	0	0	0	0	0	0	0	1	1	1	2	0	0	0	0	8	0	0	0	0	0	1	2	3	1	1	0	0	1	2	0	0	2	1	0	1	0	0	1
ENSG00000060138	42	53	37	99	70	132	199	216	28	213	147	125	120	128	84	68	74	125	143	67	191	57	91	84	36	106	179	180	81	188	36	39	40	34	33	31	39	17	63	38	29	69	81	64	66	34	52	40	63
ENSG00000060140	0	0	0	0	0	0	0	0	0	0	1	3	1	2	0	2	0	0	0	0	0	2	58	0	0	0	0	6	0	0	0	0	0	5	1	0	4	0	0	0	0	1	0	0	0	0	1	0	1
ENSG00000060237	61	11	13	30	23	55	78	15	35	47	78	102	47	128	29	33	45	129	94	117	101	24	9	15	33	24	75	12	36	3	33	34	68	20	17	25	51	43	13	32	15	11	53	44	22	30	36	29	53
ENSG00000060303	0	0	0	0	0	0	0	0	0	0	0	0	0	0	0	0	0	0	0	0	0	0	0	0	0	0	0	0	0	0	0	0	0	0	0	0	0	0	0	0	0	0	0	0	0	0	0	0	0
ENSG00000060339	194	76	122	232	73	103	103	51	130	225	350	365	221	613	111	81	137	484	293	600	469	122	177	91	58	172	231	237	123	255	69	100	143	57	73	81	41	44	102	75	84	136	167	89	57	93	194	122	60
ENSG00000060491	5	1	0	1	0	2	5	0	3	0	0	1	0	4	5	0	0	0	0	9	1	0	0	0	0	0	1	9	0	3	0	1	0	0	0	0	0	0	1	0	3	0	2	0	1	1	5	0	1
ENSG00000060558	5	0	18	0	4	17	18	6	4	11	4	16	2	14	6	12	5	1	6	15	7	0	39	11	7	65	67	44	18	34	0	1	8	2	1	1	5	4	8	3	2	5	11	7	2	6	9	12	3
ENSG00000060566	0	0	0	0	0	0	0	0	0	0	0	0	0	0	0	0	0	0	0	0	0	0	0	0	0	0	0	0	0	0	0	0	0	0	0	0	0	0	0	0	0	0	0	0	0	0	0	0	0
ENSG00000060642	1	0	0	0	0	0	0	0	0	1	1	10	4	11	0	0	0	0	0	7	18	0	0	0	0	0	0	0	0	3	0	0	1	0	0	0	3	1	0	0	0	0	4	1	0	0	4	3	1
ENSG00000060656	0	1	0	0	0	0	0	0	0	0	0	0	0	0	0	0	0	0	0	0	0	0	0	0	0	0	0	0	0	0	0	0	1	0	0	0	0	0	0	0	0	0	0	0	0	0	0	0	0
ENSG00000060688	79	36	16	33	19	44	68	124	310	87	114	247	19	268	15	45	41	146	80	302	289	29	0	58	30	166	0	205	115	149	21	16	36	26	16	5	18	18	12	7	10	17	86	16	14	35	116	115	8
ENSG00000060709	0	0	0	0	0	0	0	0	0	0	0	0	0	0	0	0	0	0	0	0	0	0	0	0	0	0	0	0	0	0	0	0	0	0	0	0	0	0	0	0	0	0	0	0	0	0	0	0	0
ENSG00000060718	0	0	0	0	0	0	0	0	0	0	0	0	0	0	0	0	0	0	0	0	0	0	0	0	0	0	0	0	0	0	0	0	0	0	0	0	0	0	0	0	0	0	0	0	0	0	0	0	1
ENSG00000060749	24	4	2	1	0	5	15	2	0	0	13	2	3	12	0	2	5	36	14	35	18	0	0	2	0	0	0	0	0	0	2	1	1	1	4	6	0	0	0	1	1	7	12	3	0	10	11	6	1
ENSG00000060762	71	25	53	42	59	67	49	94	56	60	101	129	56	103	31	34	34	49	47	131	164	50	172	46	91	133	179	183	86	238	29	14	33	16	8	27	41	7	21	20	23	12	48	18	9	34	49	51	15
ENSG00000060971	27	15	1	0	12	24	37	8	4	2	40	22	1	116	8	0	11	48	41	163	42	5	0	0	0	0	2	7	0	13	13	6	9	5	5	9	7	3	10	9	0	4	3	8	0	13	44	41	8
ENSG00000060982	8	4	0	1	0	0	5	0	0	5	10	5	14	8	0	10	1	38	1	0	36	0	19	46	0	0	12	0	14	0	0	6	1	4	0	1	5	0	0	0	0	0	1	6	0	0	1	2	1
ENSG00000061273	3	3	9	3	2	14	6	7	2	0	19	14	4	43	1	0	6	33	23	43	31	1	0	24	7	1	2	9	0	2	0	5	7	6	0	2	6	6	8	2	3	8	9	5	3	6	12	9	0
ENSG00000061337	0	0	0	0	0	0	0	0	0	0	0	0	0	0	0	0	0	0	0	0	0	0	0	0	0	0	0	0	0	0	0	0	0	0	0	0	0	0	0	0	0	0	0	0	0	0	0	0	0
ENSG00000061455	0	0	0	0	0	0	0	0	0	0	0	0	0	0	0	0	0	0	0	0	0	0	0	0	0	0	0	0	0	0	0	0	0	0	0	0	0	0	0	0	0	0	0	0	0	0	0	0	1
ENSG00000061492	0	0	0	0	0	0	0	0	0	0	0	0	0	0	0	0	0	0	0	0	0	0	0	0	0	0	0	0	0	0	0	0	0	0	0	0	0	0	0	0	0	0	0	0	0	0	0	0	0
ENSG00000061656	0	0	0	0	0	0	0	0	0	0	0	0	0	0	8	0	0	0	0	0	0	0	0	0	0	0	0	0	0	0	0	0	0	0	0	0	0	0	0	0	0	0	0	0	0	0	0	0	0
ENSG00000061676	18	75	83	19	35	52	61	105	24	916	176	200	403	143	110	167	216	577	267	109	181	61	88	32	42	96	61	125	56	49	62	47	56	46	41	44	66	51	92	32	96	30	76	63	37	34	10	29	58
ENSG00000061794	80	18	17	68	0	40	77	39	114	5	66	146	18	149	2	7	29	74	24	159	125	6	36	2	0	100	28	50	1	140	9	12	14	9	16	6	4	0	6	5	8	10	45	3	5	17	71	39	9
ENSG00000061918	325	556	900	431	377	731	639	1009	226	3185	2144	1837	2812	2188	623	1461	1453	1779	1287	1947	1560	1040	578	497	562	1145	1972	1666	1985	1130	767	343	363	344	247	230	435	211	437	126	507	300	721	948	257	443	224	351	398
ENSG00000061936	45	17	2	17	12	17	31	11	24	3	22	49	15	76	16	1	19	90	58	60	62	1	0	0	6	26	2	11	0	8	1	18	18	4	5	24	25	7	13	22	15	29	30	43	13	27	48	25	16
ENSG00000061938	2	2	0	3	1	5	1	0	1	0	0	3	2	2	0	0	3	0	4	1	6	1	1	0	0	0	1	6	2	2	1	2	3	0	2	0	2	0	3	0	0	1	0	4	0	1	2	5	8
ENSG00000061987	26	26	17	18	4	13	13	0	38	16	89	106	8	83	26	5	23	98	79	260	260	0	0	0	0	14	1	2	0	3	5	11	15	11	9	4	25	7	7	3	8	19	58	13	13	14	40	89	6
ENSG00000062038	0	0	0	0	0	0	0	0	0	0	0	0	0	0	1	0	0	0	0	0	0	0	0	0	0	0	0	0	0	0	0	0	0	0	0	0	0	0	0	0	0	0	0	0	0	0	0	0	0
ENSG00000062096	0	0	0	0	0	0	0	0	0	0	0	0	0	0	0	0	0	0	0	0	0	0	0	0	0	0	0	0	0	0	0	0	0	0	0	0	0	0	0	0	0	0	0	0	0	0	0	0	0
ENSG00000062194	175	73	130	97	80	111	102	212	92	228	468	762	234	907	89	112	90	490	247	660	907	68	71	87	135	198	175	204	69	216	109	81	88	103	38	41	72	39	51	49	96	65	153	54	55	111	172	154	86
ENSG00000062282	7	1	1	3	0	3	2	0	2	0	3	0	0	0	0	0	0	0	0	16	5	0	0	0	0	0	0	0	0	4	2	0	0	1	0	0	0	0	0	0	0	0	3	0	0	0	6	0	1
ENSG00000062370	0	0	0	0	0	0	0	0	0	0	0	0	0	0	0	0	0	0	0	0	0	0	1	0	0	0	0	0	0	0	0	0	0	0	0	0	0	0	0	0	0	0	0	0	0	0	0	0	0
ENSG00000062485	11	31	22	1	2	4	15	2	9	20	59	217	20	288	39	8	46	77	45	384	419	22	34	31	10	4	18	38	29	93	11	10	22	11	1	12	20	2	21	6	16	3	45	19	1	16	66	79	17
ENSG00000062524	1	0	1	0	0	17	6	0	16	0	0	4	0	4	4	0	0	41	11	1	23	0	0	0	0	0	0	0	0	0	0	3	0	0	1	0	0	0	0	0	0	0	6	0	0	0	2	7	0
ENSG00000062582	1	0	0	0	0	0	0	0	0	0	0	0	0	0	0	0	0	0	0	0	0	0	0	0	0	0	0	0	0	0	0	0	1	0	0	0	0	0	0	0	0	0	0	1	1	0	0	0	0
ENSG00000062598	14	72	36	2	4	3	3	15	3	177	197	475	106	377	69	96	62	191	41	660	622	38	8	9	18	126	94	121	30	102	108	28	36	22	0	17	56	21	28	10	44	10	138	21	15	47	101	121	19
ENSG00000062650	40	26	36	21	13	20	58	41	113	78	115	147	50	146	19	29	30	54	83	269	167	76	44	71	53	60	104	183	1	52	23	27	31	12	16	16	6	8	24	6	28	28	34	24	5	34	55	60	22
ENSG00000062716	150	156	71	69	20	109	154	14	158	89	196	526	103	417	34	37	60	214	126	755	903	89	86	53	31	281	121	157	32	217	93	41	45	34	19	21	26	35	19	42	35	13	78	28	26	39	155	221	40
ENSG00000062725	2	2	1	0	2	12	9	2	1	14	1	63	23	35	0	3	0	1	43	72	2	0	0	0	0	0	39	15	0	55	2	5	18	5	0	2	3	5	11	0	1	1	22	8	5	1	10	8	6
ENSG00000062822	2	0	2	0	0	0	3	0	21	0	0	6	5	23	0	0	0	0	4	23	0	0	0	0	0	0	0	23	2	12	1	6	0	1	2	0	0	0	1	0	0	0	4	2	0	4	4	9	2
ENSG00000063015	0	0	0	0	0	0	0	0	0	0	0	0	0	0	0	0	0	0	0	1	0	0	0	0	0	0	0	0	0	0	0	0	0	0	0	0	1	0	0	1	0	0	0	0	0	0	0	0	0
ENSG00000063046	59	61	59	99	23	51	64	18	118	56	229	366	78	623	47	53	36	264	91	823	542	5	31	26	0	90	82	92	18	152	65	42	88	28	20	26	30	24	19	17	31	36	142	52	28	49	126	167	35
ENSG00000063127	4	0	0	0	4	0	0	0	0	0	3	2	0	10	0	0	10	1	0	5	2	0	0	0	0	0	0	0	0	1	2	0	6	0	0	0	0	0	0	0	0	0	1	3	0	0	3	2	0
ENSG00000063169	0	0	0	0	0	0	0	0	0	0	0	0	0	0	0	0	0	0	0	0	0	0	0	0	0	0	0	0	0	0	0	0	0	0	0	0	0	0	0	0	0	0	0	0	0	0	0	0	0
ENSG00000063176	1	0	0	0	0	0	0	0	2	0	0	2	0	2	0	0	0	0	0	13	1	0	0	0	0	0	13	3	0	0	0	4	2	0	0	0	3	0	2	0	1	0	0	0	0	0	1	0	2
ENSG00000063177	1486	425	534	882	668	1223	1582	1013	2192	181	1552	2420	498	3577	260	147	285	3153	1749	2698	3335	373	411	683	378	1765	780	1224	432	3414	417	502	763	450	215	459	487	387	392	466	303	774	1610	598	288	924	1724	1310	298
ENSG00000063180	0	0	0	0	0	0	8	0	0	0	0	0	0	0	0	0	0	0	0	5	0	0	0	0	2	0	0	0	0	0	0	0	0	0	0	0	0	0	3	0	0	0	1	0	0	0	0	0	0
ENSG00000063241	5	1	0	5	0	0	7	0	56	0	3	1	0	4	0	0	0	0	6	4	21	0	0	0	0	0	0	10	0	0	0	8	0	0	0	0	1	0	0	0	0	0	12	0	0	1	7	2	0
ENSG00000063244	6	2	0	7	3	6	5	0	1	1	8	11	2	35	0	2	10	6	0	33	14	0	1	0	0	0	1	9	1	20	1	4	1	5	11	2	6	4	2	4	3	4	4	3	1	4	11	9	0
ENSG00000063245	2	0	0	1	0	2	10	2	0	1	1	0	0	0	0	1	0	2	0	0	0	0	9	0	0	1	3	0	10	1	2	1	1	0	0	1	0	0	1	0	0	0	1	2	1	0	5	2	0
ENSG00000063322	14	10	9	22	3	21	17	5	26	9	17	34	10	44	4	6	11	12	20	73	61	0	8	6	0	32	1	40	9	37	6	0	13	6	3	1	1	1	2	6	3	4	7	6	2	8	18	22	4
ENSG00000063438	0	0	0	0	0	0	0	0	0	0	1	0	0	0	0	0	0	0	0	0	0	0	0	0	0	0	0	0	0	0	0	0	0	0	0	0	0	0	0	0	0	0	0	0	0	0	0	0	0
ENSG00000063515	0	0	0	0	0	0	0	0	0	0	0	0	0	0	0	0	0	0	0	0	0	0	0	0	0	0	0	0	0	0	0	0	0	0	0	0	0	0	0	0	0	0	0	0	0	0	0	0	0
ENSG00000063587	0	0	0	0	0	0	0	1	0	0	0	0	0	0	0	0	0	0	0	0	0	0	0	0	0	0	3	1	0	0	0	0	0	2	0	0	0	0	0	0	0	0	0	0	0	0	1	0	0
ENSG00000063601	5	2	6	7	4	2	1	0	0	0	17	24	0	7	0	0	12	5	10	85	14	0	0	0	0	0	0	0	0	2	5	1	1	1	3	1	0	2	4	0	6	1	3	6	1	3	5	11	2
ENSG00000063660	0	0	0	0	0	0	0	0	0	0	0	0	0	0	0	0	0	0	0	0	0	0	0	0	0	0	0	0	0	0	0	0	0	0	0	0	0	0	0	0	0	0	0	0	0	0	0	0	0
ENSG00000063761	6	0	6	0	0	0	7	0	0	0	8	21	2	12	0	0	0	22	2	50	13	0	0	0	0	0	0	1	0	0	0	3	0	2	6	7	0	2	0	1	4	4	4	4	0	0	15	10	1
ENSG00000063854	38	10	15	27	13	63	67	0	47	30	23	78	26	118	25	1	29	34	47	83	151	15	45	0	15	46	110	42	14	106	20	11	18	8	11	3	4	10	8	11	5	8	54	16	17	18	54	34	27
ENSG00000063978	24	40	26	1	1	9	4	1	41	48	87	163	29	201	14	20	31	62	57	196	272	6	10	11	0	0	3	18	4	65	47	7	19	10	14	10	9	5	14	9	11	7	83	23	6	13	50	50	9
ENSG00000064012	162	27	41	58	11	18	55	0	26	8	83	159	23	205	15	15	7	100	62	433	622	1	8	0	0	20	17	2	7	44	44	26	23	7	10	14	4	22	12	19	17	7	88	24	12	37	67	112	22
ENSG00000064042	0	0	6	0	0	0	0	0	0	0	0	0	0	0	0	0	1	0	0	0	0	0	0	0	0	0	0	0	0	0	0	0	0	0	0	0	0	0	0	0	1	0	0	0	0	0	0	5	0
ENSG00000064102	13	4	28	25	5	5	4	0	67	20	72	127	39	230	7	34	16	70	46	183	86	47	65	82	0	1	0	11	0	28	2	3	6	6	15	16	5	1	31	2	3	21	43	4	17	37	46	51	2
ENSG00000064115	21	7	3	8	4	24	21	44	2	75	41	47	58	49	4	13	32	51	32	67	46	118	1	66	51	113	53	37	16	15	11	1	18	3	0	3	2	16	4	5	2	16	14	12	9	20	7	18	5
ENSG00000064195	0	0	0	0	0	0	0	0	0	0	0	0	0	0	0	0	0	0	0	0	0	0	0	0	0	0	0	0	0	0	0	0	0	0	0	0	0	0	0	0	0	0	0	0	0	0	0	0	0
ENSG00000064199	0	4	1	1	0	0	1	3	3	6	2	9	7	4	0	4	5	3	5	4	1	4	5	5	0	0	2	14	15	2	1	0	4	3	2	1	1	1	3	1	1	0	0	2	1	1	1	2	1
ENSG00000064201	59	41	57	41	39	115	169	265	41	134	93	95	92	90	38	54	44	68	121	139	143	105	205	31	80	169	274	238	247	90	19	16	4	13	5	16	12	6	20	6	12	22	56	30	11	22	37	51	9
ENSG00000064205	0	0	0	0	0	0	0	0	0	0	0	0	0	0	0	0	0	0	0	0	0	0	0	0	0	0	0	0	0	0	0	0	0	0	0	0	0	0	0	0	1	0	0	0	0	0	0	0	0
ENSG00000064218	0	0	0	0	0	0	0	0	0	0	0	0	0	0	0	0	0	0	0	0	0	0	0	0	0	0	0	0	0	0	0	0	0	0	0	0	0	0	0	0	0	0	0	0	0	0	0	0	0
ENSG00000064225	87	58	64	49	24	77	47	73	32	164	68	142	153	126	53	116	76	47	116	171	134	115	47	112	119	55	236	107	117	135	36	11	4	6	29	3	16	11	53	3	48	14	77	47	12	6	25	10	38
ENSG00000064270	4	0	0	0	0	0	0	0	0	0	0	0	0	0	0	0	0	0	0	0	0	0	0	0	0	0	0	0	0	0	0	0	0	0	0	0	0	0	1	0	0	0	0	0	0	1	0	0	0
ENSG00000064300	0	0	0	0	0	0	0	0	0	0	0	0	0	0	0	0	0	0	0	0	0	0	0	0	0	0	0	0	0	0	0	0	0	0	0	0	0	0	0	0	0	0	0	0	0	0	0	0	0
ENSG00000064309	0	0	1	1	0	0	0	0	0	0	0	0	0	5	0	0	0	0	0	0	2	0	0	0	1	0	0	0	0	0	0	0	0	0	0	0	2	0	0	0	0	0	1	1	0	0	1	0	0
ENSG00000064313	55	13	22	14	6	15	22	6	18	40	114	244	28	353	5	67	73	71	180	410	404	203	67	15	29	33	61	86	138	84	10	8	25	12	10	12	21	6	18	17	6	25	52	29	5	33	54	79	34
ENSG00000064393	34	31	68	39	60	45	67	99	13	98	163	155	200	257	48	78	115	97	157	148	198	16	10	68	35	91	126	86	82	72	29	24	34	40	9	18	28	15	56	27	26	18	51	63	23	57	42	44	39
ENSG00000064419	16	64	43	12	2	29	3	0	59	8	127	309	51	162	29	32	21	168	67	309	351	15	1	0	0	75	30	30	0	73	18	23	40	15	2	8	27	22	1	16	19	13	46	23	24	16	81	83	17
ENSG00000064489	0	0	0	0	0	0	0	0	0	0	0	0	0	0	0	0	0	0	0	0	0	0	0	0	0	0	0	0	0	0	0	0	0	0	0	0	0	0	0	0	0	0	0	0	0	0	0	0	0
ENSG00000064490	36	4	9	10	5	25	64	57	44	20	37	75	12	112	11	3	16	79	27	54	100	31	49	0	12	13	2	94	41	6	16	9	10	16	4	10	8	6	10	15	16	17	28	24	7	7	21	27	10
ENSG00000064545	16	0	4	1	0	10	8	36	17	0	1	45	0	24	0	0	0	9	30	26	38	0	0	0	0	0	0	0	46	21	5	2	0	0	0	0	0	0	0	1	0	3	11	0	0	3	7	11	0
ENSG00000064547	1	0	0	5	0	2	1	0	1	0	0	5	5	7	6	1	0	3	0	9	15	0	0	0	0	0	0	9	0	8	0	0	1	1	1	2	2	0	0	2	0	0	1	0	4	1	7	5	4
ENSG00000064601	4080	4078	5780	3925	5667	14221	14436	24241	3216	19066	15013	15066	19514	15177	3223	6586	9429	7709	10014	9461	14575	26986	18654	21934	13941	19765	33537	26964	24791	32439	3364	2024	2137	1654	1446	1205	2180	1366	3457	1068	3298	1922	4607	5490	2460	3270	1530	2570	1817
ENSG00000064607	5	7	0	3	8	9	4	0	14	0	6	7	1	26	1	5	0	4	10	25	15	0	0	0	0	0	3	4	0	2	5	5	3	6	0	1	3	4	11	9	1	9	8	5	0	3	10	11	9
ENSG00000064651	3	11	8	1	1	0	3	0	0	5	17	9	1	4	0	5	6	24	43	7	11	0	0	0	0	1	1	0	0	1	0	3	1	0	7	1	2	3	0	2	0	1	4	4	0	5	5	7	0
ENSG00000064652	2	19	5	17	25	17	7	61	4	45	71	31	67	41	3	25	61	13	48	8	22	57	0	20	26	33	2	9	96	63	19	1	0	11	7	0	3	13	0	0	9	8	27	51	8	14	6	3	0
ENSG00000064655	0	0	0	0	0	0	0	0	0	0	6	0	0	0	0	0	0	0	0	0	0	0	0	0	0	0	0	0	0	0	0	0	0	0	0	0	0	0	0	0	0	0	0	0	0	0	0	0	0
ENSG00000064666	61	36	49	80	11	90	159	21	136	87	173	206	52	397	27	64	67	86	120	404	440	110	91	90	29	343	262	462	292	241	70	17	18	36	11	19	26	7	26	6	32	16	142	62	29	29	124	141	22
ENSG00000064687	13	8	1	16	11	11	6	0	8	2	5	8	17	20	19	6	17	21	75	55	31	0	1	0	0	8	2	6	3	27	1	25	10	9	15	5	7	8	17	35	6	36	47	16	11	38	41	22	29
ENSG00000064692	0	0	0	0	0	0	0	0	0	0	0	0	0	0	0	0	0	0	0	0	0	0	0	0	0	0	0	0	0	0	0	0	0	0	0	0	0	0	0	0	0	0	0	0	0	0	0	0	0
ENSG00000064703	33	5	16	27	4	45	28	3	2	6	19	28	4	56	1	0	6	4	12	104	51	0	0	11	2	57	78	24	33	113	17	3	20	2	0	3	2	0	8	5	9	4	11	2	0	8	14	9	2
ENSG00000064726	2	5	9	0	5	2	12	5	1	56	36	33	45	43	14	35	39	18	7	101	9	3	10	0	2	8	7	3	1	4	14	3	5	0	4	2	3	4	6	2	11	4	23	9	10	6	2	3	7
ENSG00000064763	7	3	0	8	0	0	4	0	62	0	16	43	36	26	0	9	29	4	1	115	36	0	46	0	3	5	4	7	1	16	6	3	0	0	0	2	2	0	3	0	0	3	12	11	2	0	12	5	2
ENSG00000064787	0	0	0	0	0	0	1	0	0	0	6	1	0	0	0	0	0	1	0	0	0	0	0	0	0	0	0	0	0	1	0	0	0	0	0	0	0	0	0	0	0	0	0	0	0	0	0	0	2
ENSG00000064835	0	0	0	0	0	0	0	0	0	0	0	0	0	0	0	0	0	0	0	0	0	0	0	0	0	0	0	0	0	0	0	0	0	0	0	0	0	0	0	0	0	0	0	0	0	0	0	0	0
ENSG00000064886	112	15	13	25	0	6	33	60	124	0	63	181	2	75	0	13	5	9	31	73	316	78	38	0	122	82	0	75	0	108	6	4	52	2	8	3	0	3	1	13	1	5	49	7	0	15	89	48	0
ENSG00000064932	0	0	0	0	1	4	6	2	0	0	0	0	0	4	0	0	0	0	2	8	0	0	8	0	0	0	0	0	0	1	0	1	0	0	1	0	0	0	0	1	2	0	0	0	0	0	0	0	2
ENSG00000064933	56	15	12	18	24	10	26	133	40	30	41	93	41	67	1	11	18	57	22	183	80	55	5	31	13	14	17	0	11	44	14	15	27	15	20	7	24	11	7	13	11	24	31	31	8	14	21	17	8
ENSG00000064961	18	7	27	5	22	111	230	69	39	72	56	23	81	58	29	43	90	13	91	43	38	118	306	83	48	193	305	371	383	481	12	10	12	12	6	10	14	2	29	9	4	17	34	37	9	41	27	30	11
ENSG00000064989	3	0	0	0	0	0	0	0	0	0	5	17	0	18	0	0	5	16	0	29	10	0	0	0	0	0	0	0	0	0	0	0	0	0	0	0	0	0	3	0	0	0	0	0	0	0	0	0	0
ENSG00000064995	12	1	2	7	4	5	6	7	1	9	12	1	13	9	2	2	7	6	1	16	24	7	2	1	0	39	2	3	6	19	3	1	0	1	0	0	0	2	3	1	0	3	7	2	0	3	2	2	1
ENSG00000064999	7	4	1	0	13	6	8	4	0	4	11	17	1	14	5	9	13	12	55	2	16	1	1	7	0	0	0	1	0	22	0	2	7	0	1	4	0	0	7	5	4	5	5	3	4	7	5	1	3
ENSG00000065000	46	5	9	20	26	32	41	5	33	12	36	36	23	33	12	15	20	87	42	44	100	0	6	25	0	50	2	14	0	51	8	17	31	14	18	20	27	13	27	26	10	37	21	19	14	47	31	27	25
ENSG00000065029	9	4	13	6	2	6	8	7	0	33	46	48	33	98	18	23	5	57	12	78	166	4	3	0	9	22	22	26	22	50	3	4	1	4	4	0	4	5	2	0	9	4	20	19	2	7	34	18	1
ENSG00000065054	0	0	0	0	1	5	1	20	2	0	14	1	2	0	0	0	3	0	0	2	0	0	0	0	0	0	0	0	0	0	2	0	0	0	0	1	1	0	0	0	1	0	5	4	1	0	2	1	2
ENSG00000065057	10	0	0	7	0	0	15	0	17	0	8	17	0	9	0	0	4	17	15	20	16	0	0	0	9	0	7	0	0	4	0	1	0	2	0	1	3	0	2	2	1	12	6	6	3	5	7	0	1
ENSG00000065060	11	30	0	2	0	4	1	3	12	35	63	56	68	88	36	7	2	26	80	52	40	35	4	0	12	2	2	0	0	15	6	13	10	20	0	1	4	8	9	7	10	7	38	3	3	10	23	21	16
ENSG00000065135	158	52	34	21	11	92	46	95	77	150	132	357	75	468	27	62	41	282	77	620	667	168	94	51	7	30	143	176	111	190	69	9	20	13	18	7	5	8	9	15	7	13	100	32	12	39	121	107	15
ENSG00000065150	22	50	1	4	20	9	27	0	30	59	129	230	26	415	3	7	14	171	52	514	512	1	0	1	0	68	0	30	0	54	78	23	33	20	20	22	5	15	9	6	16	23	106	19	7	10	62	92	0
ENSG00000065154	27	17	0	13	1	18	31	1	70	15	54	165	24	228	19	6	26	73	8	303	307	63	0	0	19	83	55	5	0	170	31	0	12	1	2	5	0	3	2	7	14	0	51	24	0	15	70	81	4
ENSG00000065183	10	18	0	7	6	10	5	0	1	28	143	174	21	194	4	11	14	57	0	413	127	0	0	0	0	15	0	105	0	10	19	8	13	5	1	18	4	13	12	8	1	5	73	5	5	17	31	49	6
ENSG00000065243	86	74	77	77	34	71	55	66	101	51	140	214	76	146	38	19	50	86	142	336	225	38	8	10	1	11	90	32	16	55	33	50	47	18	32	14	46	16	30	25	25	26	44	51	10	30	69	61	55
ENSG00000065268	17	0	0	0	0	13	48	27	8	0	17	5	0	12	4	0	1	44	16	101	26	19	0	1	1	0	0	0	0	50	0	4	4	2	0	6	0	3	0	1	0	7	29	0	1	1	12	2	3
ENSG00000065308	0	0	1	0	0	3	2	1	0	4	0	11	2	14	2	2	0	1	5	29	1	5	0	11	0	0	0	5	1	1	12	0	1	2	0	0	0	3	0	0	2	4	7	5	2	3	2	7	1
ENSG00000065320	0	0	0	0	0	0	0	0	0	0	0	0	0	0	0	0	0	0	0	0	0	0	0	0	0	0	0	0	0	0	0	0	0	0	0	0	0	0	0	0	0	0	0	0	0	0	0	0	0
ENSG00000065325	0	0	0	0	0	0	0	0	0	0	0	0	0	0	0	0	0	0	0	0	0	0	0	0	0	0	0	0	0	0	0	0	0	0	0	0	0	0	0	0	0	0	0	0	0	0	0	0	0
ENSG00000065328	0	2	1	0	2	1	0	2	36	2	0	1	0	0	1	0	0	0	2	8	19	1	18	0	0	0	1	0	1	1	0	1	1	0	1	0	6	0	0	1	0	3	2	0	0	1	5	2	0
ENSG00000065357	74	72	49	31	53	41	40	6	8	39	210	667	37	1559	107	47	85	1128	328	1544	1121	40	19	74	0	26	196	202	35	130	69	116	206	41	40	54	56	51	49	63	52	105	259	62	55	182	245	296	42
ENSG00000065361	0	0	0	0	0	0	0	0	0	0	0	0	0	0	1	0	0	0	0	0	0	0	0	0	0	0	0	0	0	0	0	0	0	0	0	0	0	0	0	0	0	0	0	0	0	0	0	0	0
ENSG00000065371	0	0	0	0	0	0	0	0	0	0	0	0	0	0	0	0	0	0	0	0	0	0	0	0	0	0	0	0	0	0	0	0	0	0	0	0	0	0	0	0	0	0	0	0	0	0	0	0	0
ENSG00000065413	86	30	48	115	21	29	43	4	20	0	138	401	91	400	38	42	47	124	287	728	661	0	0	0	0	72	1	36	34	22	33	21	56	70	41	39	18	32	29	33	18	45	120	23	25	76	129	133	48
ENSG00000065427	129	128	112	90	11	205	211	32	278	66	347	767	115	784	38	52	69	266	219	866	903	47	65	58	113	460	129	222	64	374	111	33	113	51	30	32	50	38	35	27	37	61	275	73	21	78	243	237	28
ENSG00000065457	5	1	13	3	0	13	1	0	4	41	29	45	61	53	1	4	18	36	10	78	108	0	0	9	27	44	5	11	30	21	4	5	5	2	1	4	5	0	4	3	2	1	12	3	3	6	14	13	2
ENSG00000065485	6	2	0	20	0	12	7	5	10	45	5	14	31	0	2	8	1	10	31	6	16	94	0	0	0	62	99	39	16	0	0	5	5	0	11	4	0	0	16	0	0	2	10	6	1	12	10	6	12
ENSG00000065491	0	8	0	3	5	2	1	0	0	5	0	21	4	34	0	1	3	0	0	24	33	1	1	6	0	7	0	9	0	0	1	0	0	2	1	0	5	3	0	0	0	3	5	1	0	0	4	5	0
ENSG00000065518	145	87	113	94	103	128	108	247	219	380	263	229	233	236	23	91	88	341	176	161	251	114	147	123	117	210	286	150	173	267	69	124	60	45	63	65	93	32	67	54	70	76	193	135	50	72	186	87	83
ENSG00000065526	47	8	17	38	14	18	14	31	3	24	35	32	44	55	7	2	17	23	27	61	43	0	0	0	57	0	0	19	6	1	11	21	7	6	2	17	27	0	16	16	7	12	23	3	6	5	28	14	5
ENSG00000065534	576	1113	1484	986	913	1598	2238	2868	1069	5957	4389	4227	4295	6803	2107	2707	3032	4814	4932	3570	5280	4182	1688	3721	2290	5514	7890	7832	7123	3829	1461	519	733	724	596	559	890	386	1327	419	1083	502	1706	1451	619	1068	672	887	686
ENSG00000065548	298	42	92	104	43	111	93	38	223	73	166	283	47	361	21	26	40	140	142	353	303	76	36	107	62	147	57	163	47	184	85	21	36	25	38	26	44	15	26	17	25	18	133	53	14	53	119	78	33
ENSG00000065559	7	8	6	3	1	2	6	6	0	1	5	1	7	30	0	8	4	7	11	10	6	7	2	0	7	0	36	0	0	1	14	6	4	0	0	3	4	0	2	4	2	1	3	0	0	2	12	10	4
ENSG00000065600	20	22	22	2	8	17	31	7	5	76	73	109	60	93	13	19	15	17	56	146	61	98	0	17	51	178	39	83	37	143	3	3	14	8	8	7	2	0	11	1	10	9	26	9	3	12	12	18	1
ENSG00000065609	0	0	0	0	0	0	0	0	0	0	0	0	0	0	0	0	0	0	0	0	0	0	0	0	0	0	0	0	0	0	0	0	0	0	0	0	0	0	0	0	0	0	0	0	0	0	0	0	0
ENSG00000065613	32	16	38	0	13	18	18	4	22	38	70	79	22	37	14	3	17	78	36	61	56	7	49	95	16	1	3	14	45	30	17	6	25	0	8	6	5	13	9	5	14	14	21	15	4	1	22	25	10
ENSG00000065615	196	115	61	23	73	106	93	49	148	325	295	354	283	341	72	158	242	166	228	711	462	462	147	165	189	30	197	242	184	443	98	28	29	28	26	8	90	17	29	20	52	28	163	52	38	89	131	90	45
ENSG00000065618	0	0	0	0	0	0	0	0	0	0	0	0	0	0	1	0	0	0	0	0	0	1	0	0	0	0	0	0	0	0	0	0	0	0	0	0	0	0	0	0	0	0	0	0	0	1	0	0	0
ENSG00000065621	0	0	0	0	0	0	0	0	0	1	0	0	1	0	0	0	0	0	0	1	6	0	0	0	0	0	0	1	0	0	0	0	0	0	0	3	0	0	0	0	0	0	0	0	0	0	0	2	0
ENSG00000065665	9	0	0	2	0	0	0	46	1	0	10	0	12	15	0	0	0	0	0	14	11	24	0	0	0	0	0	0	0	20	0	0	6	0	1	0	0	2	3	0	0	1	5	0	0	0	1	13	1
ENSG00000065675	11	62	90	17	28	24	35	47	17	320	251	293	222	399	32	161	131	151	167	496	362	96	41	27	71	111	288	430	323	210	66	29	67	39	26	14	28	20	30	9	32	37	123	73	26	48	62	63	38
ENSG00000065717	0	0	3	0	0	0	1	19	0	0	1	0	0	6	1	0	0	2	0	11	3	0	0	0	0	0	1	1	0	0	3	0	0	4	6	0	0	0	2	0	0	1	7	3	0	2	3	0	0
ENSG00000065802	6	0	0	0	1	10	4	21	1	3	3	5	0	3	2	0	1	5	17	14	5	0	0	0	0	0	0	0	0	4	1	1	2	1	0	0	0	0	1	0	0	0	4	2	0	4	6	9	0
ENSG00000065809	15	14	14	4	5	11	11	2	6	34	96	159	33	205	10	13	10	92	50	155	98	7	16	0	1	4	17	12	26	53	17	3	33	12	5	8	16	7	8	3	19	10	52	18	6	10	39	32	1
ENSG00000065833	13	26	25	14	7	24	15	3	2	148	60	12	45	24	0	0	10	1	20	30	48	0	15	0	1	8	0	0	0	59	0	18	2	5	0	4	10	5	0	3	44	4	3	66	1	3	0	11	2
ENSG00000065882	61	28	25	54	29	37	44	140	51	38	73	79	52	73	17	51	36	29	138	57	105	112	112	106	100	189	55	28	46	46	43	8	47	11	8	14	17	22	17	35	17	20	64	44	23	31	21	34	25
ENSG00000065883	22	15	9	4	7	7	10	14	10	0	22	34	5	43	4	8	14	42	1	101	35	0	16	36	0	16	9	0	0	13	6	6	29	4	6	5	8	12	8	8	2	5	32	8	9	8	23	13	9
ENSG00000065911	35	77	66	48	10	31	83	97	27	400	280	424	347	268	52	85	141	365	143	255	382	377	152	144	182	274	193	148	202	279	50	41	56	15	30	35	57	20	50	20	90	43	119	69	38	84	109	69	43
ENSG00000065923	3	5	0	0	4	0	1	0	1	0	1	5	15	7	0	2	1	0	1	2	2	0	0	0	0	1	2	0	0	1	0	2	7	0	1	0	0	5	0	8	1	0	4	1	1	2	2	0	2
ENSG00000065970	1	2	3	1	5	1	1	3	0	8	5	32	2	9	1	4	19	21	19	41	51	1	0	0	0	13	0	0	1	4	17	1	1	11	3	1	3	5	0	0	5	0	23	4	3	3	0	3	1
ENSG00000065978	181	80	101	79	114	270	226	230	124	213	240	195	152	210	63	59	98	174	154	144	244	80	47	64	70	123	164	152	162	101	72	87	81	75	63	77	64	49	80	68	63	106	147	118	63	78	95	74	84
ENSG00000065989	5	0	7	3	0	2	4	0	0	0	2	0	0	1	0	0	0	0	0	1	5	0	0	0	0	0	0	4	0	0	0	0	0	0	0	0	1	0	0	0	0	0	2	0	1	2	2	7	0
ENSG00000066027	95	37	19	12	74	76	75	65	97	209	194	106	110	135	80	98	77	151	195	93	98	23	3	209	159	108	54	19	63	112	35	40	40	38	66	25	37	31	52	18	34	32	53	24	6	49	39	29	57
ENSG00000066032	0	0	0	0	0	0	0	0	0	0	0	0	0	0	0	1	0	0	0	0	0	0	0	0	0	0	0	0	0	0	0	0	0	0	0	0	0	0	0	0	0	9	0	0	0	0	0	5	0
ENSG00000066044	0	0	1	3	2	1	5	2	0	7	5	5	0	14	0	2	0	5	0	4	6	7	0	3	2	0	2	0	1	4	0	4	2	3	1	1	2	0	5	0	0	0	3	4	0	3	7	4	0
ENSG00000066056	0	0	0	0	0	0	0	0	0	0	0	0	0	1	0	0	0	0	0	0	0	0	0	0	0	0	0	0	0	0	0	0	0	0	1	0	0	0	0	0	0	0	0	0	0	0	0	0	1
ENSG00000066084	6	6	2	0	3	4	3	0	53	0	13	35	6	66	0	34	2	42	7	48	63	0	0	0	1	1	0	0	0	0	1	13	1	3	2	2	5	0	2	5	3	3	7	3	0	12	6	17	10
ENSG00000066117	11	1	13	0	1	6	11	1	8	0	5	4	5	4	4	8	2	14	16	19	10	0	1	0	0	0	1	1	0	1	4	3	5	0	25	6	0	0	6	1	5	3	6	2	4	3	6	7	3
ENSG00000066135	17	7	5	1	1	5	0	0	28	0	13	90	5	91	16	0	13	38	1	101	55	3	0	0	0	0	0	0	0	1	4	7	3	4	5	4	1	1	7	1	10	2	48	5	4	2	9	32	1
ENSG00000066136	48	35	16	10	5	51	31	10	38	96	90	252	64	227	43	63	35	102	141	320	307	28	21	25	23	116	179	53	47	130	36	2	10	9	4	12	13	12	22	20	8	13	58	16	11	37	50	60	22
ENSG00000066185	57	15	110	48	103	71	71	401	195	218	231	132	91	101	20	72	89	316	94	47	142	347	388	203	110	362	196	121	35	319	23	91	37	38	40	52	58	35	34	19	52	13	44	49	19	25	72	19	39
ENSG00000066230	0	0	0	0	0	0	0	0	0	0	0	0	0	0	0	0	0	0	0	0	0	0	0	0	0	0	0	0	0	0	0	0	0	0	0	0	0	0	0	0	0	0	0	0	0	0	0	0	0
ENSG00000066248	0	0	0	0	0	0	0	0	0	0	0	0	0	0	0	0	0	0	0	0	0	0	0	0	0	0	0	0	0	0	0	0	0	0	0	0	0	0	0	0	0	0	0	0	0	0	0	0	0
ENSG00000066279	6	0	8	0	4	2	21	3	3	0	13	2	0	10	1	0	10	5	0	1	0	0	0	0	0	0	0	0	0	2	0	0	1	0	2	1	1	0	0	7	0	7	5	1	0	1	10	4	6
ENSG00000066294	17	41	63	31	32	37	34	78	57	304	196	174	236	231	101	201	123	169	130	228	323	57	89	122	31	109	208	227	228	299	81	17	33	14	5	22	44	12	48	15	113	20	92	71	25	24	23	59	48
ENSG00000066322	52	23	0	25	12	62	43	37	32	24	29	65	18	69	10	3	15	56	29	136	130	57	2	0	61	7	51	52	43	104	23	11	17	6	16	6	13	16	27	17	3	10	58	4	13	23	62	39	14
ENSG00000066336	12	3	0	5	15	19	30	0	0	0	0	5	0	1	1	0	0	1	0	7	12	0	1	0	1	0	0	0	0	1	1	4	2	1	3	4	3	3	4	2	3	6	1	0	0	1	9	7	5
ENSG00000066379	19	3	1	0	11	22	8	29	61	11	31	67	9	82	2	4	7	11	34	53	59	11	10	15	9	13	13	42	14	65	11	14	16	6	6	7	13	4	2	4	4	10	24	6	2	15	14	21	6
ENSG00000066382	4	0	0	0	1	1	2	2	2	3	3	11	7	0	0	8	4	7	0	2	6	0	0	15	1	0	1	0	4	9	0	0	0	0	0	2	2	0	3	0	1	0	4	1	0	2	4	0	1
ENSG00000066405	0	0	0	0	0	0	0	0	0	0	0	0	0	0	0	0	0	0	0	0	0	0	0	0	0	0	0	0	0	0	0	0	0	0	0	0	0	0	0	0	0	0	0	0	0	0	0	0	0
ENSG00000066422	5	8	13	0	2	2	1	0	2	6	25	67	20	62	6	2	9	9	17	116	63	0	12	0	0	9	1	0	0	1	2	6	8	0	1	9	0	0	1	0	8	3	12	4	0	4	7	10	2
ENSG00000066427	91	24	1	43	18	5	26	70	78	15	40	63	17	93	9	5	12	59	37	94	82	31	28	17	47	6	42	62	0	28	2	13	25	18	1	6	14	11	8	13	5	15	42	8	1	19	31	35	7
ENSG00000066455	18	13	5	2	3	24	11	24	4	11	42	29	12	80	1	13	2	112	31	63	64	0	39	0	0	0	19	0	0	33	6	0	4	5	9	2	1	0	13	5	6	4	32	4	6	9	29	19	5
ENSG00000066468	0	0	0	0	0	0	0	0	0	0	0	0	0	0	0	0	0	0	0	0	0	0	0	0	0	0	0	0	0	0	0	0	0	0	0	0	0	0	0	0	0	1	0	0	0	0	1	1	0
ENSG00000066557	2	1	1	45	2	12	2	1	2	12	16	116	22	90	0	11	17	119	4	353	170	0	1	0	0	1	12	27	0	51	4	3	13	1	0	6	0	9	2	0	0	3	10	8	2	1	7	19	6
ENSG00000066583	4	6	11	1	0	15	9	0	37	40	30	56	8	45	5	11	11	48	22	75	49	3	11	7	6	16	19	65	34	28	8	0	7	1	0	5	2	0	3	2	0	8	21	8	5	4	25	22	2
ENSG00000066629	0	0	0	0	0	0	0	0	0	0	0	0	0	0	0	0	0	0	0	0	0	0	0	0	0	0	0	0	0	0	0	0	0	0	0	0	0	0	0	0	0	0	0	0	0	0	0	0	0
ENSG00000066651	5	4	19	4	0	0	4	1	1	0	47	51	20	54	0	0	0	27	38	127	139	0	0	100	0	0	0	0	0	29	17	10	20	5	0	3	9	6	6	10	2	23	32	14	3	11	44	18	4
ENSG00000066654	32	18	36	75	7	20	26	9	19	130	120	228	61	202	55	34	51	196	31	125	140	20	44	105	44	181	113	141	66	104	26	5	24	13	19	19	24	6	16	4	24	13	36	13	4	10	46	25	14
ENSG00000066697	1	3	4	4	4	4	8	6	1	10	8	12	8	7	0	9	4	5	11	6	9	5	20	17	11	10	9	6	13	6	6	9	8	6	2	2	5	5	8	4	7	7	11	17	13	3	10	7	8
ENSG00000066735	0	0	0	0	0	0	0	0	0	0	0	0	0	0	0	0	0	0	0	0	0	0	0	0	0	0	0	0	0	0	0	0	0	0	0	0	0	0	0	0	0	0	0	0	0	0	0	0	0
ENSG00000066739	2	6	12	0	0	1	1	0	0	0	19	52	59	55	3	2	0	27	8	15	94	0	0	0	0	23	0	0	5	5	13	3	3	3	0	1	0	0	2	2	0	4	8	6	5	4	2	11	12
ENSG00000066777	75	29	64	66	28	23	34	92	93	85	209	222	86	168	32	29	65	154	117	247	171	12	5	0	1	63	78	123	1	101	42	39	99	46	17	29	25	23	25	27	26	51	68	67	30	34	76	58	34
ENSG00000066813	0	0	0	0	0	0	0	0	0	0	0	0	0	0	0	0	0	0	0	0	0	0	0	0	0	0	0	0	0	0	0	0	0	0	0	0	0	0	0	0	0	0	0	0	0	0	0	0	0
ENSG00000066827	2	2	0	0	0	0	0	0	2	0	0	10	4	0	3	7	1	0	14	2	9	0	1	0	0	2	0	0	0	1	0	0	1	1	0	0	0	0	0	0	0	0	3	1	2	2	1	3	1
ENSG00000066855	0	6	5	1	0	0	1	0	0	23	14	31	10	6	3	12	6	16	26	11	32	3	0	5	1	30	9	1	4	0	5	1	0	2	3	2	1	1	4	1	2	2	7	6	4	6	10	7	0
ENSG00000066923	5	4	1	2	0	0	0	3	0	0	1	10	0	3	1	1	1	1	5	20	2	0	0	0	0	0	0	0	0	2	2	2	1	2	0	0	2	1	0	0	0	9	2	0	0	0	2	0	1
ENSG00000066926	21	0	22	6	3	10	6	1	19	35	39	93	45	28	8	22	24	87	41	64	123	58	37	0	0	9	6	23	18	52	12	2	3	1	0	4	1	0	10	18	10	2	41	3	7	14	22	23	11
ENSG00000066933	26	13	7	8	10	7	14	1	24	8	46	94	10	89	17	0	10	73	104	219	111	0	1	1	0	0	0	4	46	9	6	11	7	15	4	8	36	20	2	7	3	20	32	8	18	28	28	18	27
ENSG00000067048	48	1	0	1	0	33	12	0	15	0	163	202	0	0	0	0	12	0	0	575	421	2	1	67	0	0	0	0	0	141	103	0	25	0	20	11	3	0	10	0	21	0	88	40	0	21	79	0	0
ENSG00000067057	25	45	27	47	42	129	128	133	22	219	218	200	225	174	73	100	184	81	155	404	270	411	181	237	81	257	359	226	148	93	74	19	16	37	33	16	55	33	81	21	64	50	118	61	40	45	24	47	15
ENSG00000067064	16	9	16	25	5	13	9	3	10	36	28	80	8	48	3	7	3	53	12	90	104	12	37	2	20	67	6	24	18	44	22	5	9	6	3	4	6	0	10	0	7	3	28	14	0	10	21	20	4
ENSG00000067066	645	112	154	405	98	322	358	169	492	87	350	897	50	842	69	62	147	474	345	1174	926	342	17	219	70	425	290	196	33	497	134	126	209	64	81	114	101	82	128	182	61	129	452	124	60	224	451	263	190
ENSG00000067082	490	146	118	269	226	451	634	64	80	101	100	182	57	259	51	33	47	133	133	412	217	70	50	52	22	128	249	121	165	309	92	32	67	41	21	19	18	16	36	29	26	25	148	35	12	53	114	101	58
ENSG00000067113	3	0	0	6	0	0	1	0	8	0	1	6	0	4	0	0	0	4	0	2	4	0	0	0	0	0	0	0	0	5	0	3	6	4	0	0	0	0	0	0	0	2	0	0	2	1	5	0	0
ENSG00000067141	0	0	0	12	2	1	0	0	0	0	16	25	0	7	0	0	0	3	0	0	2	0	0	0	0	0	0	0	0	0	0	1	1	0	0	2	8	0	0	0	0	0	0	5	0	3	7	0	0
ENSG00000067167	470	754	1140	534	645	506	838	1809	472	3736	4076	3107	2961	2832	996	1316	2031	3669	2316	3652	2732	3104	1841	2985	1554	2615	2324	2437	2198	2950	915	389	504	395	393	326	653	395	342	387	797	248	954	815	382	490	715	413	387
ENSG00000067177	0	0	0	0	1	0	0	0	0	0	0	0	0	0	0	0	0	0	0	1	0	0	0	0	0	0	0	0	0	0	0	0	0	0	0	0	0	0	0	0	0	0	0	0	0	0	0	0	0
ENSG00000067182	13	2	1	8	0	10	13	4	14	1	21	93	17	119	12	1	4	10	17	258	172	0	0	0	0	23	11	1	0	31	4	4	5	2	7	6	9	2	2	8	9	4	37	16	1	3	55	52	4
ENSG00000067191	1	0	0	1	1	5	2	1	0	0	3	0	1	0	0	2	3	0	5	0	5	0	0	0	0	0	11	0	0	3	0	0	0	0	0	0	0	0	0	0	0	0	4	3	1	0	3	0	0
ENSG00000067208	106	5	27	27	10	38	37	49	105	9	47	32	19	14	9	5	53	21	27	41	15	40	2	0	1	57	35	0	1	1	6	19	8	10	18	12	9	0	20	26	4	14	37	10	11	11	29	4	30
ENSG00000067221	1	0	0	0	0	4	0	0	0	0	1	0	0	4	0	0	0	0	0	6	0	0	0	0	0	0	0	28	0	0	0	1	0	4	0	1	0	0	0	2	0	0	0	0	0	0	0	0	0
ENSG00000067225	1044	3716	5091	1026	1063	3472	5717	2721	1580	18625	16705	18023	19254	15759	3605	6094	11298	7812	9866	11699	19877	11365	6983	8874	6044	10310	13993	11654	9862	14145	4343	1632	2413	1352	1229	1040	2163	1398	3052	1358	3536	1306	5917	5420	2446	3155	1919	3043	1848
ENSG00000067248	248	32	43	109	21	98	80	140	103	67	138	265	40	171	28	23	53	109	184	210	352	1	41	3	55	68	14	57	48	77	14	35	42	32	6	36	19	19	19	40	27	22	99	45	10	53	83	66	47
ENSG00000067334	59	46	7	14	14	40	40	4	79	11	117	138	37	181	11	16	23	106	70	272	205	8	0	0	24	32	6	12	0	105	54	25	31	13	0	20	16	1	20	10	5	25	33	32	14	28	97	63	13
ENSG00000067365	36	40	75	43	24	101	110	139	89	186	145	140	153	106	12	33	50	95	131	82	141	144	226	272	181	101	219	147	104	57	36	37	61	42	22	15	49	30	50	15	52	33	46	66	26	44	17	26	26
ENSG00000067369	11	26	6	6	15	2	4	9	10	0	35	50	1	92	14	12	1	28	88	182	104	0	0	0	4	7	0	0	0	39	0	8	0	2	2	6	2	0	3	5	6	4	14	1	1	6	19	11	7
ENSG00000067445	0	0	0	0	0	0	0	0	0	0	0	0	0	7	1	0	0	16	0	18	0	0	0	0	0	0	0	0	0	0	0	0	0	0	0	0	0	0	0	0	0	0	0	0	1	0	0	1	0
ENSG00000067533	12	2	7	0	5	1	2	0	3	6	2	26	5	23	9	2	3	13	4	17	35	0	0	0	1	16	4	14	0	26	0	1	5	0	5	10	1	5	3	0	0	5	13	5	3	6	8	14	3
ENSG00000067560	1107	834	1052	594	449	1493	2014	1959	1003	2952	3317	3588	3002	3821	915	1626	1799	2381	2384	3594	4719	3282	2952	2791	2126	4237	5750	5407	4346	5244	948	471	542	409	287	276	574	318	710	277	661	455	1129	1149	450	685	704	793	416
ENSG00000067596	62	25	2	14	7	18	14	6	17	10	89	240	13	140	17	27	11	93	37	199	272	0	6	11	0	41	13	1	1	41	27	22	39	11	9	8	7	3	9	16	13	10	60	16	12	20	60	53	8
ENSG00000067601	18	3	16	7	12	21	19	54	21	25	10	9	23	35	6	7	10	0	18	24	38	0	49	6	0	18	21	0	44	43	1	6	3	1	0	4	2	0	7	3	15	5	10	9	9	6	9	7	2
ENSG00000067606	3	3	0	0	0	1	3	0	0	0	5	5	0	9	0	0	0	1	0	1	0	1	0	0	0	0	0	0	0	2	0	0	0	0	0	3	0	0	0	0	0	0	4	3	0	2	0	0	2
ENSG00000067646	20	0	0	0	0	2	19	0	38	0	23	18	0	0	0	0	4	0	0	66	25	0	0	0	0	0	0	0	0	9	10	0	2	0	20	1	0	0	2	0	0	0	3	1	0	6	6	0	0
ENSG00000067704	39	23	1	5	22	17	35	0	66	7	72	108	81	231	0	10	11	46	13	396	126	0	0	0	0	1	10	15	0	118	33	3	29	1	13	7	3	10	2	3	9	5	18	4	5	33	55	61	14
ENSG00000067715	0	1	0	0	0	0	0	0	0	0	0	0	0	0	0	0	0	1	0	0	0	0	0	0	0	0	0	0	0	0	0	1	0	0	0	0	0	0	0	0	0	0	0	1	0	0	1	0	1
ENSG00000067798	0	0	0	0	0	0	0	0	1	0	0	0	0	0	1	0	0	0	0	0	0	0	0	0	0	0	0	0	0	0	0	2	0	0	0	0	0	1	0	0	1	0	0	0	0	0	0	0	0
ENSG00000067829	216	63	46	138	122	279	332	282	147	211	159	348	76	346	92	53	118	125	117	366	660	321	147	108	288	387	344	395	416	482	124	49	48	47	8	22	39	26	52	34	52	23	148	71	17	42	110	114	52
ENSG00000067836	28	24	15	21	21	56	82	1	24	7	41	29	37	19	24	40	22	17	54	84	48	58	37	69	0	11	110	37	59	12	5	3	0	1	14	7	18	3	11	11	5	14	22	3	9	3	13	14	7
ENSG00000067840	0	0	0	0	1	0	1	0	0	0	0	0	0	0	0	0	0	2	0	0	1	0	0	0	0	0	0	0	0	0	0	0	0	0	0	1	0	0	0	0	0	0	0	0	0	0	0	0	0
ENSG00000067842	0	0	0	0	0	0	0	0	0	0	0	0	0	0	0	0	0	0	0	0	0	0	0	0	0	0	0	0	0	0	0	0	0	0	0	0	0	0	0	0	0	0	0	0	0	0	0	0	0
ENSG00000067900	496	213	284	602	209	317	283	122	440	605	729	742	506	645	281	241	303	791	649	988	561	200	312	227	276	438	391	310	102	421	208	215	256	156	195	170	236	148	170	128	171	180	335	281	147	218	269	156	248
ENSG00000067955	3	4	1	0	2	3	2	2	0	10	12	12	0	34	8	1	8	6	0	40	26	0	0	0	1	1	1	2	2	0	3	1	1	0	1	1	4	1	1	3	0	2	6	0	3	2	3	6	3
ENSG00000067992	31	80	15	10	10	87	92	30	45	185	198	164	184	247	12	60	77	144	166	165	145	281	194	104	87	404	279	293	263	405	73	8	35	12	28	9	20	35	58	44	59	23	57	36	26	43	43	28	22
ENSG00000068001	0	0	0	0	0	0	0	0	0	0	0	0	0	2	0	0	0	0	2	0	0	0	0	0	0	0	0	2	0	0	0	0	0	0	0	0	0	0	2	0	0	0	0	0	0	0	0	0	0
ENSG00000068024	3	7	2	6	0	1	4	0	0	0	4	6	0	6	3	0	0	5	16	23	3	0	0	0	0	0	1	0	0	1	4	3	4	2	3	1	0	1	2	1	0	5	2	2	2	4	4	0	1
ENSG00000068028	27	9	5	7	7	18	28	0	18	4	24	88	7	57	5	18	20	108	28	126	81	1	7	0	0	49	29	46	7	81	16	3	4	6	1	5	11	4	4	1	1	4	21	9	4	13	33	28	8
ENSG00000068078	0	0	0	0	0	0	0	0	0	0	0	1	0	0	0	0	0	0	0	0	0	0	0	0	0	0	0	0	0	0	0	0	0	0	0	0	0	0	0	0	0	0	0	0	0	0	0	0	0
ENSG00000068079	122	58	9	27	11	80	122	8	92	5	54	154	13	114	1	7	17	37	23	93	231	60	0	33	8	34	112	0	22	115	29	5	27	6	11	13	5	4	3	11	5	4	52	19	5	23	39	51	9
ENSG00000068097	20	13	14	0	1	2	1	0	4	0	43	77	0	65	2	24	3	18	2	167	179	1	0	0	0	5	0	22	4	23	8	9	0	6	0	2	0	6	2	2	7	12	35	9	1	8	14	17	3
ENSG00000068120	43	14	35	12	0	26	52	9	79	48	71	118	45	123	28	41	56	76	76	206	225	29	42	26	14	178	80	148	132	197	24	2	26	5	6	13	12	7	25	16	7	13	48	16	19	30	36	33	12
ENSG00000068137	0	0	0	0	0	0	0	0	0	0	0	2	0	0	0	0	0	0	0	0	0	0	0	0	0	0	0	0	0	0	0	1	0	0	0	0	0	0	0	0	0	0	1	0	0	0	0	0	0
ENSG00000068305	50	27	39	32	20	18	31	12	3	143	99	128	83	112	8	33	41	126	90	118	121	23	81	80	23	49	51	25	15	86	43	23	37	21	12	26	10	24	37	20	17	23	70	13	13	22	42	19	33
ENSG00000068308	16	46	30	21	9	54	56	16	95	250	144	136	106	101	32	61	163	100	97	93	194	53	32	52	69	105	307	203	177	73	49	37	44	25	23	11	36	26	38	31	34	6	52	52	42	18	17	33	22
ENSG00000068323	1	2	9	3	3	10	11	4	12	2	10	6	9	9	0	3	1	0	5	37	24	10	2	0	3	45	12	11	3	2	3	3	8	0	0	2	0	1	3	2	3	3	5	3	0	2	7	5	5
ENSG00000068354	3	3	8	6	11	7	9	2	5	21	4	20	15	17	12	6	22	17	20	26	48	29	42	12	12	6	63	47	35	38	4	3	12	8	0	7	11	3	3	1	0	5	18	2	6	6	2	4	9
ENSG00000068366	111	69	149	89	62	143	73	302	231	302	259	373	239	534	96	194	166	213	237	566	595	18	117	117	121	120	278	314	350	52	113	46	75	64	37	32	29	36	78	25	62	68	166	84	64	57	48	71	65
ENSG00000068383	12	18	3	4	5	86	22	14	43	105	80	26	81	28	10	53	22	64	76	47	28	18	42	10	46	60	5	7	43	67	8	3	15	7	12	5	20	5	7	7	10	19	22	25	7	18	18	4	7
ENSG00000068394	28	1	0	6	8	16	19	0	11	0	10	48	6	62	9	0	0	37	18	68	81	57	0	0	56	85	37	64	14	69	1	0	17	11	10	6	5	4	4	0	0	15	9	18	2	3	22	24	14
ENSG00000068400	104	39	79	98	77	71	126	50	58	189	116	198	123	232	16	63	74	130	316	392	206	67	46	88	37	109	217	105	151	116	19	57	37	26	25	22	37	4	34	29	24	38	96	52	49	45	74	57	33
ENSG00000068438	34	2	16	19	21	16	57	32	32	32	38	148	31	121	2	11	8	33	102	208	164	36	0	43	0	3	40	0	1	75	0	6	14	4	12	3	0	9	2	7	8	1	42	3	2	12	46	43	8
ENSG00000068489	11	6	3	6	0	24	14	0	1	18	21	32	9	19	10	4	5	23	25	15	36	0	1	0	0	0	1	1	0	2	9	1	9	6	3	1	3	1	2	1	6	2	9	0	1	1	6	5	2
ENSG00000068615	0	0	0	0	0	0	3	0	0	0	2	0	9	0	0	0	0	0	0	1	0	0	0	0	0	0	0	0	0	4	0	0	0	0	0	0	0	0	0	0	0	0	0	0	0	4	0	0	0
ENSG00000068650	19	38	20	2	9	21	30	12	2	99	118	148	75	40	17	77	22	38	34	55	63	20	12	9	2	25	1	30	16	91	24	8	3	2	5	7	7	7	15	13	19	7	13	31	4	19	14	20	21
ENSG00000068654	2	0	0	0	0	2	1	0	2	0	13	27	1	71	2	0	0	22	2	5	16	0	0	0	0	0	0	0	0	2	0	4	1	0	1	4	0	1	0	10	0	5	8	2	0	2	3	26	4
ENSG00000068697	398	76	35	79	122	245	232	143	156	61	138	456	40	340	19	35	19	184	72	723	595	75	48	114	23	275	41	63	42	260	126	8	55	25	9	18	9	3	26	11	8	13	104	27	7	25	203	116	23
ENSG00000068724	6	15	7	0	16	7	9	0	1	0	9	25	0	9	12	0	0	14	1	67	10	0	0	0	0	0	0	0	0	3	6	1	0	0	0	0	3	0	1	0	5	1	12	3	0	2	5	5	4
ENSG00000068745	59	14	23	5	21	30	59	35	53	27	59	134	28	116	10	9	19	46	45	133	162	54	2	10	9	113	40	70	46	47	26	5	21	11	7	11	10	5	2	8	22	14	54	15	5	15	45	45	22
ENSG00000068781	0	0	0	0	0	0	0	0	0	0	0	0	0	1	0	0	0	0	0	0	0	0	0	0	0	0	0	0	0	0	0	0	0	0	0	0	0	0	0	0	0	0	0	0	0	0	0	0	0
ENSG00000068784	53	14	1	35	5	12	27	3	76	26	76	88	24	91	1	18	21	29	18	41	298	1	60	0	1	0	0	13	30	35	29	5	9	22	5	9	46	5	3	10	7	4	53	8	5	13	54	41	21
ENSG00000068793	74	33	42	15	32	86	36	241	0	136	86	140	110	195	66	76	30	61	117	245	306	23	9	1	28	4	63	61	29	71	26	25	23	0	21	20	19	5	29	18	18	19	54	59	16	17	35	40	21
ENSG00000068796	4906	2266	3917	7120	7440	12158	9517	10466	3352	10432	13422	6390	9694	6908	2705	5742	4366	5082	6265	4688	4743	14000	14377	12226	8740	15014	21519	14696	13109	11586	2590	2916	2425	1620	1609	1665	1919	1527	1939	1118	2765	2273	3253	3844	1586	2108	1469	1711	2472
ENSG00000068831	36	72	88	112	114	261	173	266	74	370	239	232	301	369	103	196	237	270	426	324	275	460	446	366	274	651	469	613	498	807	78	181	86	117	78	93	104	60	170	72	122	138	198	156	80	146	183	96	98
ENSG00000068878	70	61	149	37	17	34	59	4	7	244	356	295	150	184	32	70	102	385	143	230	237	46	43	18	0	36	37	0	6	125	59	61	67	51	15	35	27	48	21	28	22	41	83	47	46	50	51	47	56
ENSG00000068885	2	1	4	0	1	1	0	0	0	0	17	11	3	11	3	0	3	14	0	13	4	0	0	0	0	0	2	0	0	1	1	0	3	0	0	1	0	0	0	1	0	0	4	1	0	0	2	5	0
ENSG00000068903	217	145	129	92	90	311	410	341	35	559	377	572	293	598	83	282	291	332	258	649	823	526	378	332	319	323	892	807	682	522	178	37	124	62	40	39	69	30	109	43	76	70	185	146	57	63	118	147	45
ENSG00000068912	44	13	8	8	11	39	62	35	83	101	94	296	67	214	19	62	62	197	83	541	227	50	8	65	24	34	144	151	68	166	60	11	23	15	23	21	9	11	27	18	19	16	115	44	11	32	83	57	7
ENSG00000068971	0	0	0	0	1	2	6	0	0	0	9	2	0	4	0	0	1	0	0	7	7	21	0	0	0	22	0	0	0	1	1	0	0	0	0	7	0	0	0	1	0	1	3	1	0	1	8	0	1
ENSG00000068976	2	0	0	0	0	0	0	0	0	0	10	3	0	0	0	4	0	0	1	1	7	0	0	0	0	0	0	0	0	0	0	0	0	0	7	1	0	2	0	0	0	1	0	0	0	3	0	2	0
ENSG00000068985	0	0	0	0	0	0	0	0	0	0	0	0	0	0	0	0	0	0	0	0	0	0	0	0	0	0	0	0	0	0	0	0	0	0	0	0	0	0	0	0	0	0	0	0	0	0	0	0	0
ENSG00000069011	0	0	0	0	0	0	0	0	0	0	0	0	0	0	0	0	0	0	0	0	0	0	0	0	0	0	0	0	0	0	0	0	0	0	0	0	0	0	0	0	0	0	0	0	0	0	0	0	0
ENSG00000069018	0	0	0	0	0	0	0	0	0	0	0	0	0	0	0	0	0	0	0	0	0	0	0	0	0	0	0	0	0	0	0	0	0	0	0	0	0	0	0	0	0	0	0	0	0	0	0	0	0
ENSG00000069020	7	15	61	25	38	52	37	50	29	161	83	110	156	148	61	60	84	91	53	87	81	52	37	91	16	56	73	51	36	54	47	59	62	40	32	35	50	41	45	44	32	26	88	89	28	44	60	28	41
ENSG00000069122	0	0	0	0	0	0	0	0	0	0	0	0	0	0	0	0	0	0	0	0	0	0	0	0	0	0	0	0	0	0	0	0	0	0	0	0	0	0	0	0	0	0	0	0	0	0	0	2	0
ENSG00000069188	1	0	6	0	0	0	0	0	0	0	0	6	0	2	1	0	0	0	6	0	0	0	0	0	0	0	0	0	0	0	0	0	0	0	0	0	0	0	0	0	0	0	0	0	0	12	12	1	0
ENSG00000069206	0	0	0	0	0	0	0	0	0	0	0	0	0	0	0	0	0	0	0	0	0	0	0	0	0	0	0	0	0	0	0	0	0	0	0	0	0	0	0	0	0	0	0	0	0	0	0	0	0
ENSG00000069248	31	56	14	16	4	15	2	6	46	14	24	50	11	62	13	48	13	149	104	188	182	0	13	0	0	20	2	3	0	12	1	3	4	16	2	9	26	6	10	16	12	3	41	18	5	20	33	34	9
ENSG00000069275	101	27	51	57	58	49	68	79	110	76	109	101	68	107	39	37	63	152	156	79	66	15	37	40	2	7	72	154	49	63	41	58	58	58	61	67	66	34	70	37	17	100	102	54	29	73	30	32	46
ENSG00000069329	103	125	92	45	22	76	77	25	158	107	436	1004	229	1216	84	115	128	472	208	1636	1744	43	88	37	50	426	243	208	123	376	157	37	72	45	42	32	16	29	41	21	30	29	236	66	43	90	263	370	41
ENSG00000069345	56	61	42	50	18	71	54	60	57	216	240	377	169	570	65	88	88	202	145	396	421	150	90	22	82	202	170	217	152	286	48	18	31	25	43	31	26	19	53	23	29	25	115	65	27	36	103	121	32
ENSG00000069399	6	0	0	4	0	10	4	1	6	0	0	1	1	0	0	0	0	0	0	0	4	0	0	0	0	3	0	0	0	0	5	2	0	1	0	0	0	0	2	5	1	2	5	0	1	0	3	5	5
ENSG00000069424	19	18	18	0	4	22	17	5	2	12	27	117	16	101	2	5	3	55	20	168	185	1	1	0	0	5	3	4	2	39	30	11	31	8	8	5	2	0	5	2	10	26	71	23	1	15	43	38	7
ENSG00000069431	0	0	0	0	0	0	0	0	0	0	0	0	0	0	0	0	0	0	0	0	0	0	0	1	0	0	0	0	0	0	0	0	0	0	0	0	0	0	0	0	0	0	0	0	0	0	0	0	0
ENSG00000069482	0	0	0	0	0	0	0	0	0	0	0	0	0	0	0	0	0	0	0	0	0	0	0	0	0	0	0	0	0	0	0	0	0	0	0	0	0	0	0	0	0	0	0	0	0	0	1	0	0
ENSG00000069493	50	37	28	76	41	17	72	26	236	11	220	328	56	405	8	14	12	104	69	571	399	47	0	0	0	56	32	124	13	212	26	25	54	26	14	20	9	22	12	12	36	40	105	30	10	65	120	107	17
ENSG00000069509	25	3	5	55	7	4	2	19	24	16	18	39	5	25	1	7	9	12	12	26	36	0	5	0	5	27	4	45	31	32	0	3	0	6	1	7	3	5	1	2	4	11	6	7	0	4	11	5	3
ENSG00000069535	0	1	39	10	1	6	18	12	5	15	33	9	39	28	11	3	12	0	97	5	21	0	0	81	1	32	0	0	122	0	2	5	1	1	7	3	1	0	12	0	3	7	10	39	16	1	4	11	8
ENSG00000069667	182	0	7	6	18	5	39	57	0	9	28	54	18	147	11	4	3	12	36	92	43	177	0	0	1	46	26	49	0	42	24	4	30	1	10	7	11	5	5	2	14	17	46	30	12	7	44	44	3
ENSG00000069696	0	0	0	0	0	0	0	0	0	0	0	0	0	0	0	0	0	0	0	0	0	0	0	0	0	0	0	0	0	0	0	0	0	0	0	0	0	0	0	0	0	0	0	0	0	0	0	0	0
ENSG00000069702	7	3	20	0	4	7	0	6	1	0	6	65	2	36	3	5	1	14	11	37	58	0	0	0	0	0	0	0	0	1	3	0	6	4	1	0	3	4	2	1	0	2	7	10	0	13	20	11	6
ENSG00000069712	3	0	0	0	0	0	0	0	0	0	10	3	4	15	0	0	0	0	10	24	0	0	0	0	0	0	0	0	0	4	0	0	0	0	7	1	0	0	0	0	0	0	1	0	0	0	0	0	0
ENSG00000069764	0	0	0	0	0	0	0	0	0	0	0	2	0	0	0	0	0	0	0	0	0	0	0	0	0	0	0	0	0	0	0	1	0	0	0	0	0	0	0	0	0	0	0	0	0	0	0	0	0
ENSG00000069812	0	0	0	1	0	0	0	0	0	0	0	0	0	0	0	0	1	0	0	0	0	0	0	0	0	0	0	0	0	0	0	1	0	0	0	0	0	0	0	1	0	0	0	0	0	0	1	0	1
ENSG00000069849	207	12	11	42	16	92	105	52	192	0	28	128	19	119	11	4	19	29	40	173	90	67	135	81	18	57	124	136	150	195	17	0	14	6	0	4	10	1	2	6	6	5	40	9	14	10	58	52	13
ENSG00000069869	15	0	0	2	3	9	3	31	0	37	63	60	34	66	14	32	20	0	63	21	87	60	0	0	36	22	1	0	21	22	6	4	2	9	0	10	2	0	1	1	1	4	13	14	10	15	15	9	0
ENSG00000069943	30	27	18	46	4	26	39	69	22	63	79	61	34	67	9	42	10	48	12	149	178	61	10	80	0	18	92	26	156	85	9	6	10	4	12	4	15	6	8	2	8	4	16	9	7	16	17	41	11
ENSG00000069956	15	26	37	2	6	31	17	5	34	138	108	67	51	68	26	41	20	19	83	87	78	19	24	17	6	57	71	71	34	9	42	3	5	13	11	6	10	10	22	11	11	9	21	16	15	13	12	19	16
ENSG00000069966	38	182	151	102	60	289	395	256	130	772	467	668	946	732	229	335	651	257	482	737	638	887	700	574	398	654	1112	1185	895	763	283	81	116	64	81	76	162	57	187	48	191	114	292	296	73	140	86	139	148
ENSG00000069974	45	9	0	2	2	78	35	0	18	8	20	36	4	12	4	2	7	17	17	47	72	42	0	0	0	6	18	12	0	0	8	0	12	3	3	5	16	1	4	0	0	7	27	6	0	3	30	29	3
ENSG00000069998	8	2	0	3	3	7	6	0	0	1	2	11	2	22	0	0	0	5	11	35	53	0	0	2	14	0	0	0	0	21	3	2	0	0	0	2	0	0	3	0	0	0	5	6	0	0	10	13	0
ENSG00000070010	338	133	172	298	182	444	453	920	521	450	419	479	307	492	83	104	238	457	284	306	493	805	751	282	444	994	1047	879	406	712	157	99	133	78	39	88	94	41	81	74	87	83	209	154	53	120	100	116	84
ENSG00000070018	0	0	0	0	0	0	0	2	0	0	3	5	0	0	2	0	0	2	17	8	1	0	0	0	0	0	0	0	0	24	0	0	0	3	0	0	0	0	0	1	0	0	0	1	0	1	4	0	1
ENSG00000070019	1	0	0	0	0	0	0	0	0	0	0	0	0	0	0	0	0	0	0	1	0	0	0	0	0	0	0	0	0	0	0	0	0	0	0	0	0	0	0	0	0	0	1	0	0	0	0	0	0
ENSG00000070031	0	0	0	0	0	0	0	0	0	0	0	0	0	0	0	0	0	0	0	0	0	0	0	0	0	0	0	0	0	0	0	0	0	0	0	0	0	0	0	0	0	0	0	0	0	1	0	0	0
ENSG00000070047	6	1	0	18	1	22	4	0	0	2	6	7	7	6	14	0	0	13	33	9	0	0	0	0	0	0	0	1	0	2	0	11	3	10	10	5	0	2	1	0	0	6	7	2	0	7	7	0	3
ENSG00000070061	14	6	7	9	3	1	3	3	11	0	26	220	40	154	58	2	40	131	32	366	206	0	0	0	1	0	0	0	0	0	18	19	22	12	16	18	1	7	5	6	4	6	51	21	4	24	61	88	16
ENSG00000070081	541	73	101	256	100	481	225	550	748	426	410	805	361	758	89	84	131	731	448	803	829	346	346	158	130	643	374	407	379	742	76	153	191	100	54	138	88	64	108	84	85	140	346	128	87	154	317	248	65
ENSG00000070087	0	0	0	0	0	0	0	0	0	0	3	2	0	5	0	0	0	2	0	2	1	0	0	0	0	3	0	1	0	0	0	0	1	2	0	1	0	0	0	0	0	0	0	0	0	0	2	0	0
ENSG00000070159	0	0	0	0	0	0	0	0	0	0	7	0	0	0	0	0	0	0	0	0	0	0	0	0	0	0	0	0	0	0	0	0	0	0	0	0	0	0	0	0	0	0	0	0	0	0	0	0	0
ENSG00000070182	10	6	4	4	8	33	19	14	2	84	64	50	85	60	72	64	65	36	76	72	41	25	21	43	39	25	16	25	44	22	7	9	14	16	7	2	12	6	19	10	4	11	22	31	25	11	4	10	16
ENSG00000070190	1800	1945	2677	2725	2718	3322	2971	5562	2122	11888	7259	5281	7491	5247	2475	3839	3123	9899	5782	2921	5106	4875	5434	4819	2918	5881	10811	9668	8257	6060	2406	1285	1237	1528	906	899	1603	790	1254	611	1502	1054	2367	1881	745	1222	1372	782	1615
ENSG00000070193	0	0	0	0	0	0	0	0	0	0	0	0	0	0	0	0	0	0	0	0	0	0	0	0	0	0	0	0	0	0	0	0	0	0	0	0	0	0	0	0	0	0	0	0	0	0	0	0	0
ENSG00000070214	16	27	43	15	41	69	33	76	30	212	77	121	235	108	64	112	66	61	91	47	108	37	26	11	40	38	173	83	46	126	38	17	15	17	13	23	24	10	53	2	20	27	46	52	9	37	26	18	50
ENSG00000070269	6	7	1	19	0	5	14	1	0	4	52	19	12	31	12	14	14	14	3	108	28	0	20	0	0	0	28	16	2	3	9	2	8	8	0	0	0	2	6	2	24	4	18	0	0	2	11	19	9
ENSG00000070366	6	0	1	16	0	0	3	0	11	10	22	35	1	66	1	4	15	8	21	15	21	0	0	0	9	8	0	0	4	10	1	12	10	8	0	6	13	0	0	2	0	1	13	4	1	4	9	12	2
ENSG00000070367	28	13	16	56	30	34	37	10	177	58	66	74	65	133	45	43	56	73	112	212	51	0	42	7	47	27	97	103	1	19	54	17	3	4	6	5	7	0	9	5	2	13	28	40	20	4	35	23	9
ENSG00000070371	1	0	0	0	0	0	7	0	0	0	10	3	0	18	0	0	0	1	2	24	24	0	0	0	0	0	0	0	0	0	6	0	0	0	4	0	0	0	0	0	0	0	8	0	1	0	2	1	0
ENSG00000070388	0	0	0	0	0	0	0	0	0	0	0	0	0	0	0	0	0	0	0	0	0	0	0	0	0	0	0	0	0	0	0	0	0	0	0	0	0	0	0	0	0	0	0	0	0	0	0	0	0
ENSG00000070404	0	0	0	0	0	0	1	0	0	0	0	0	0	1	0	0	0	0	0	0	0	0	0	0	0	0	0	0	0	0	0	0	0	0	0	0	0	0	0	0	0	0	0	0	0	0	0	0	0
ENSG00000070413	5	8	15	4	1	25	24	14	0	48	68	80	52	91	15	12	42	30	27	102	55	44	37	20	28	31	30	38	57	63	17	6	8	10	4	5	3	10	10	6	6	11	30	23	5	13	12	12	12
ENSG00000070423	6	0	3	0	1	7	14	0	17	1	0	0	4	18	0	0	2	1	9	16	6	0	0	0	0	0	9	0	0	13	0	1	1	0	1	2	0	0	1	3	0	1	7	4	0	5	4	5	1
ENSG00000070444	2	1	1	0	1	0	1	1	2	0	0	0	0	3	0	1	0	1	0	4	0	0	0	0	1	0	1	0	0	0	0	2	3	0	0	1	0	0	0	0	0	0	0	0	0	0	0	2	1
ENSG00000070476	8	0	2	9	0	0	0	0	1	0	0	2	0	5	2	1	0	3	4	9	1	0	0	0	0	0	1	0	2	0	0	3	1	0	0	0	0	0	0	1	0	0	4	0	1	1	5	2	3
ENSG00000070495	21	18	8	7	13	18	22	5	46	7	9	50	14	42	3	5	0	32	41	101	80	0	0	16	1	53	0	0	8	66	2	8	6	4	2	4	5	2	1	3	2	0	18	5	5	4	26	19	4
ENSG00000070501	84	27	30	8	13	25	25	79	42	0	70	75	5	62	14	10	21	59	42	87	156	0	0	0	0	103	0	1	1	135	15	9	28	9	11	3	8	10	10	6	2	20	34	14	7	10	58	60	11
ENSG00000070526	0	0	0	0	0	0	0	0	0	0	4	8	0	0	11	0	5	0	0	27	6	0	0	0	0	0	0	0	0	0	2	0	2	0	0	0	0	0	0	0	0	0	2	0	0	0	0	0	0
ENSG00000070540	156	64	170	68	109	370	457	331	218	682	391	245	657	379	274	206	276	267	584	395	428	467	470	675	199	800	1392	1417	1242	459	164	61	72	74	77	24	195	40	188	27	108	65	134	127	75	61	65	121	99
ENSG00000070601	0	0	1	0	0	0	0	0	0	0	0	0	0	0	1	0	1	0	0	0	0	0	0	0	0	0	0	0	0	0	0	0	0	0	2	0	0	0	0	0	0	0	0	0	0	0	0	0	0
ENSG00000070610	14	12	5	5	1	15	10	0	18	23	32	29	25	22	17	5	22	15	0	107	39	0	0	0	1	29	33	15	24	19	32	8	4	7	6	1	0	2	19	2	5	6	25	6	6	6	29	24	2
ENSG00000070614	6	17	14	8	10	26	26	36	2	77	59	61	114	57	21	56	54	60	75	95	74	25	8	16	15	59	64	62	40	85	11	3	14	11	18	13	17	17	15	17	23	9	33	36	31	20	7	11	5
ENSG00000070669	12	14	0	28	5	11	11	0	10	0	49	85	19	178	12	4	3	95	32	184	66	0	0	0	0	0	0	31	0	3	13	3	34	12	14	6	10	5	2	26	13	12	69	27	2	21	55	23	7
ENSG00000070718	27	26	0	35	2	20	21	38	2	75	52	42	47	130	0	20	6	78	63	112	88	88	26	48	33	70	45	42	37	35	15	8	16	2	6	8	4	4	3	1	14	0	22	13	6	8	13	13	2
ENSG00000070729	0	0	0	0	0	0	0	0	0	0	0	0	0	0	0	0	0	0	0	0	0	0	0	0	0	0	0	0	0	0	0	0	0	0	0	0	0	0	0	0	0	0	0	0	0	0	0	0	0
ENSG00000070731	6	3	0	1	0	0	3	0	2	4	0	4	0	2	0	0	0	0	0	11	10	0	0	0	0	0	0	0	0	0	1	0	1	0	3	0	0	0	0	2	0	0	0	0	0	0	1	0	1
ENSG00000070748	0	0	0	0	0	0	0	0	0	0	0	0	0	0	0	0	0	0	0	0	0	0	0	0	0	0	0	0	0	0	0	0	0	0	0	0	0	0	0	0	0	0	0	0	0	0	0	0	0
ENSG00000070756	1625	1142	1840	1055	764	1659	1783	1790	1788	4246	5260	4132	3065	6665	1765	2482	2561	3954	5025	8291	5229	2242	1365	1114	756	2080	3158	3289	2259	2270	1240	1054	1754	854	877	793	1055	607	1328	851	1010	1144	2343	1950	837	1620	1849	2087	1240
ENSG00000070759	1	1	3	1	0	3	7	0	3	0	10	17	2	26	2	1	2	4	0	13	32	1	0	0	0	0	26	13	0	0	1	0	0	0	0	1	2	0	1	1	0	2	2	1	0	1	0	0	1
ENSG00000070761	9	7	4	6	13	14	26	1	32	0	30	91	16	76	4	6	3	5	18	83	79	0	0	18	10	22	31	33	0	25	7	7	6	8	0	3	2	2	4	1	3	1	20	9	3	4	7	16	0
ENSG00000070770	10	3	0	12	5	16	6	24	7	28	17	21	14	8	2	2	0	0	16	2	28	0	0	1	0	86	0	0	0	16	3	9	8	2	1	3	3	1	3	0	5	5	5	1	1	1	7	10	3
ENSG00000070778	0	0	0	0	0	0	0	0	0	0	0	0	0	0	0	0	0	0	0	0	0	0	0	0	0	0	0	0	0	0	0	0	0	0	0	0	0	0	0	0	0	0	0	0	0	1	0	0	0
ENSG00000070785	74	42	9	19	14	4	23	56	58	0	45	84	14	194	2	0	5	49	21	150	128	12	0	1	32	74	128	0	0	46	29	6	17	12	5	8	16	14	7	5	4	9	43	18	9	19	33	49	2
ENSG00000070808	0	0	0	0	0	0	0	0	0	0	0	0	0	0	0	0	0	0	0	0	0	0	0	0	0	0	0	0	0	0	0	0	0	0	0	0	0	0	0	0	0	0	0	0	0	0	0	0	0
ENSG00000070814	4	1	4	8	3	19	14	7	34	0	10	34	7	54	7	4	1	50	19	61	20	0	0	0	0	2	0	2	0	15	3	12	11	15	10	9	4	4	6	16	6	9	25	10	2	11	19	12	3
ENSG00000070831	689	213	381	355	272	918	461	496	670	568	1123	841	512	523	199	296	262	737	538	480	720	783	506	712	525	894	1055	676	568	634	239	211	215	139	147	177	191	160	206	119	246	186	426	369	133	217	257	253	215
ENSG00000070882	5	18	0	0	2	0	3	0	9	1	5	49	7	61	5	8	3	64	25	106	55	0	0	0	0	0	0	0	0	1	1	15	0	2	0	17	6	0	4	2	0	6	22	4	6	9	9	20	4
ENSG00000070886	0	0	0	0	0	0	0	0	0	0	0	0	0	0	0	0	0	0	0	0	0	0	0	0	0	0	0	0	0	0	0	0	0	0	0	0	0	0	0	0	0	0	0	0	0	0	0	0	0
ENSG00000070915	0	0	0	0	0	0	0	0	0	0	0	0	0	0	1	0	0	0	0	0	1	0	0	0	0	0	0	0	0	0	1	0	0	0	0	0	0	0	0	0	0	0	0	0	0	0	0	0	1
ENSG00000070950	17	12	0	1	9	4	23	105	40	30	62	24	29	52	6	9	14	55	22	89	140	0	6	1	0	26	106	28	0	19	26	12	8	10	4	4	4	0	2	10	13	0	15	3	8	13	18	13	7
ENSG00000070961	363	83	64	96	75	102	97	56	98	9	101	185	15	169	30	7	27	104	126	436	315	25	0	4	0	116	2	0	55	61	25	40	47	23	36	49	46	33	36	71	30	75	149	45	24	46	98	65	56
ENSG00000070985	0	0	0	0	0	0	0	0	0	0	0	0	0	0	0	0	0	6	0	0	0	0	0	0	0	0	0	0	0	0	0	0	0	0	0	0	0	0	0	0	0	0	0	0	0	0	0	0	0
ENSG00000071051	7	4	7	2	7	20	12	8	1	37	16	15	17	29	17	7	31	7	23	13	10	10	18	16	6	11	28	18	12	9	4	6	4	8	8	6	11	5	7	4	9	14	6	12	14	5	5	6	4
ENSG00000071054	142	88	64	161	73	76	71	38	61	141	145	176	85	280	110	19	36	121	160	177	176	37	28	18	26	117	3	1	24	61	50	51	38	27	26	36	41	17	24	39	61	54	82	52	25	50	71	47	57
ENSG00000071073	93	13	1	49	10	23	18	18	1	2	76	180	41	227	1	0	2	118	43	229	207	0	0	0	0	0	0	6	0	42	47	7	48	7	13	21	1	12	9	3	5	4	25	27	8	5	54	56	6
ENSG00000071082	3069	784	713	1184	931	1854	1580	1475	3036	468	3712	4501	1038	5923	290	250	431	5291	2036	3933	5401	499	440	719	568	2255	1310	1401	632	4577	802	798	1915	664	668	771	841	724	678	648	667	881	3672	1149	518	1974	2921	2394	456
ENSG00000071127	240	1015	1333	357	297	639	1454	603	504	4734	4023	3443	4406	5418	1186	1894	2251	3522	2464	3285	5112	2530	2113	1888	1238	4239	4131	4622	3185	4598	1221	498	593	515	349	361	554	319	860	281	715	435	1303	1446	514	801	670	709	474
ENSG00000071189	85	49	34	33	21	8	40	1	16	39	122	248	29	222	8	42	37	8	151	422	288	0	52	0	1	3	160	37	1	67	46	25	13	11	1	8	13	8	20	6	41	18	31	16	15	33	48	48	31
ENSG00000071203	0	0	0	0	0	0	0	0	0	0	0	0	0	0	0	0	0	0	0	0	0	0	0	0	0	0	0	0	0	0	0	0	0	0	0	0	0	0	0	0	0	0	0	0	0	0	0	0	0
ENSG00000071205	22	18	99	30	111	105	24	176	15	86	49	64	193	57	36	55	32	36	90	41	13	50	133	162	121	99	148	51	46	50	36	38	9	33	32	28	17	17	32	28	10	25	32	47	18	14	21	20	25
ENSG00000071242	3	0	0	0	0	0	1	0	0	0	9	0	1	3	0	0	0	0	0	0	0	0	0	0	0	0	0	11	0	2	0	1	1	0	0	0	0	0	0	0	0	0	0	0	0	0	0	2	0
ENSG00000071243	90	50	100	99	30	27	49	80	83	193	248	347	146	192	59	76	85	248	213	336	406	150	142	68	58	136	158	197	98	61	149	43	52	7	32	42	78	31	40	23	31	27	116	34	17	50	101	83	38
ENSG00000071246	1	0	0	0	2	0	4	0	0	0	2	0	1	7	0	2	0	0	2	0	1	0	0	0	0	0	0	0	0	0	0	0	0	0	0	0	1	0	1	0	0	0	0	2	0	1	2	0	0
ENSG00000071282	1	0	0	1	0	1	0	3	0	2	0	0	0	3	0	0	0	1	0	0	8	5	6	0	0	0	0	0	0	4	0	4	1	1	0	0	0	0	0	0	0	0	0	2	0	0	3	1	0
ENSG00000071462	233	45	15	92	39	100	141	165	238	38	137	233	29	272	20	32	33	244	124	277	357	115	0	60	15	93	119	164	154	255	28	28	58	33	24	21	37	23	24	24	14	27	92	44	10	57	155	84	19
ENSG00000071537	28	38	57	24	20	20	25	22	9	101	129	325	122	269	34	79	71	170	78	389	407	13	58	42	1	53	38	10	34	34	45	20	25	9	19	8	10	3	17	6	36	11	67	40	5	32	40	64	17
ENSG00000071539	0	0	5	0	0	0	0	0	0	0	0	16	4	14	8	3	8	11	26	5	0	0	2	0	0	0	0	13	21	5	1	0	6	2	0	0	6	0	7	0	2	0	0	0	3	5	5	0	0
ENSG00000071553	91	46	6	54	49	111	232	130	50	112	92	78	80	137	1	56	74	26	76	249	201	211	178	163	109	341	284	300	108	198	21	23	8	8	9	22	11	8	32	12	29	21	43	60	17	14	70	46	15
ENSG00000071564	5	0	3	1	4	1	5	0	3	0	6	1	0	3	0	0	0	1	1	2	2	0	0	0	0	11	0	1	0	10	0	0	2	0	0	4	1	0	2	4	1	4	1	3	1	2	9	2	1
ENSG00000071575	1	0	1	1	1	0	4	0	10	0	4	22	2	54	3	0	4	20	9	55	34	0	0	0	0	6	0	9	0	5	3	1	1	2	0	5	2	2	1	1	3	3	17	4	1	8	3	13	6
ENSG00000071626	8	0	0	3	1	3	5	0	10	0	8	4	2	7	0	2	1	1	0	4	1	0	0	0	0	0	1	10	1	0	2	0	0	0	0	1	2	0	0	1	0	3	2	1	0	0	0	8	0
ENSG00000071655	0	0	0	1	0	0	0	0	0	0	0	0	0	0	0	1	0	0	0	0	0	0	0	0	0	0	0	0	0	0	0	0	0	0	0	0	0	0	0	0	0	0	0	0	0	0	0	0	0
ENSG00000071677	0	0	0	0	0	0	0	0	0	0	0	0	0	0	0	0	0	0	0	0	0	0	0	0	0	0	0	0	0	0	0	0	0	0	0	0	0	0	0	0	0	0	0	0	0	0	0	0	0
ENSG00000071794	68	19	17	20	41	38	37	55	27	248	157	212	182	243	42	64	28	163	183	271	399	213	13	10	102	247	106	72	86	121	16	38	47	18	28	16	6	28	14	17	50	27	60	23	7	19	43	65	36
ENSG00000071859	32	0	7	10	7	28	41	19	7	44	45	18	60	46	16	3	5	50	82	32	64	10	1	0	2	32	29	3	52	35	8	9	12	15	3	13	22	18	14	11	11	13	53	25	7	35	15	13	22
ENSG00000071889	9	0	1	0	23	28	34	6	16	0	0	14	3	38	4	4	11	2	14	22	21	53	9	32	44	133	141	109	71	103	5	7	0	1	4	6	2	0	4	2	3	1	10	2	11	1	10	14	4
ENSG00000071894	19	19	8	16	8	21	16	15	21	4	10	57	2	14	9	4	25	66	123	121	78	1	0	3	0	0	2	1	2	41	16	10	38	7	9	6	19	1	6	12	9	31	38	7	20	27	9	19	17
ENSG00000071909	0	41	0	3	0	4	0	75	0	2	25	76	35	57	0	39	39	6	0	67	17	0	1	0	55	1	28	7	0	29	10	10	13	1	0	2	0	11	22	3	8	2	5	0	17	14	1	17	0
ENSG00000071967	12	0	0	0	0	14	17	0	2	0	6	33	9	11	0	0	7	4	0	63	51	0	0	0	6	0	0	6	0	3	6	1	0	0	0	0	0	1	1	0	0	3	6	3	0	0	1	7	1
ENSG00000071991	0	0	0	0	0	0	2	0	0	0	0	0	0	0	0	0	0	0	0	0	4	0	0	0	0	0	0	0	0	0	0	0	0	0	0	0	0	0	0	0	0	0	0	0	0	0	0	0	0
ENSG00000071994	30	5	14	0	5	43	39	51	73	14	32	27	15	35	0	0	0	35	1	75	76	0	0	1	32	50	42	13	0	22	8	2	10	1	0	7	0	7	7	10	15	1	11	2	4	10	17	14	3
ENSG00000072041	0	0	0	0	0	0	0	0	0	0	0	0	0	0	0	0	0	0	0	0	0	0	0	0	0	0	0	0	0	0	0	0	0	0	0	0	0	0	0	0	0	0	0	0	0	0	0	0	0
ENSG00000072042	149	216	390	323	148	416	551	413	281	1518	1180	1134	1079	1184	398	787	585	1159	860	873	860	1152	856	1161	948	1014	2180	2258	1748	1696	352	134	194	179	129	122	212	109	236	62	269	133	649	337	173	209	130	222	206
ENSG00000072062	12	13	9	6	14	13	31	20	0	30	6	26	22	24	1	17	4	50	44	11	13	63	36	18	30	38	11	10	14	26	2	2	14	3	2	4	6	1	6	1	12	2	14	4	9	15	1	12	0
ENSG00000072071	0	0	0	0	0	2	1	0	1	0	0	0	0	0	0	0	0	0	0	2	0	0	0	0	0	0	0	0	0	0	0	0	0	0	0	0	1	0	0	0	0	0	0	0	0	0	3	0	0
ENSG00000072080	0	0	0	0	0	0	0	0	0	0	0	0	0	0	0	0	0	0	0	0	0	0	0	0	0	0	0	0	0	0	0	0	0	0	0	0	0	0	0	0	0	0	0	0	0	0	0	0	0
ENSG00000072110	291	1414	2588	404	540	1145	1256	1527	420	6363	6423	4821	6826	7945	2053	3518	3569	3351	4056	6891	5838	4211	3680	2619	1850	4021	8094	8100	7431	4856	1789	542	739	1120	517	380	830	355	1748	425	967	758	1609	2380	916	889	427	850	774
ENSG00000072121	5	2	1	0	4	21	2	0	1	2	8	19	13	24	13	0	6	45	32	21	70	0	0	0	0	0	0	0	1	12	1	1	0	8	3	5	3	3	0	3	1	7	10	14	2	2	11	24	6
ENSG00000072133	0	0	0	0	0	0	0	0	0	0	0	0	0	0	0	0	0	0	0	0	0	0	0	0	0	0	0	0	0	0	0	0	0	0	0	0	0	0	0	0	0	0	0	0	0	0	0	0	0
ENSG00000072134	0	0	0	0	0	0	0	0	0	0	0	3	0	5	0	1	0	0	6	10	7	0	0	0	0	0	0	0	0	0	0	3	0	0	0	0	0	0	0	1	0	0	5	0	0	2	4	0	3
ENSG00000072135	57	37	123	60	110	155	286	237	115	466	200	163	190	306	86	116	180	187	203	124	206	474	450	334	230	533	711	639	571	553	67	88	88	53	50	73	88	48	109	48	92	55	158	169	55	137	88	88	79
ENSG00000072163	0	0	3	4	0	1	8	0	0	0	3	2	3	28	0	1	0	0	1	3	0	0	9	0	14	4	0	0	13	33	0	1	0	0	0	1	1	0	4	1	0	2	5	2	0	3	2	1	0
ENSG00000072182	0	0	0	0	0	0	0	0	0	0	0	0	0	0	0	0	0	0	0	0	0	0	0	0	0	0	0	0	0	0	0	0	0	0	0	0	0	0	0	0	0	0	0	0	0	0	0	0	0
ENSG00000072195	0	0	0	0	0	0	0	0	0	0	0	0	0	0	0	0	0	0	0	0	0	0	0	0	0	0	0	0	0	0	0	0	0	0	1	0	0	0	0	0	0	0	0	0	1	3	0	0	0
ENSG00000072201	0	0	0	0	0	0	0	0	0	0	1	0	0	0	0	0	0	0	0	0	0	0	0	0	0	0	0	0	0	0	0	0	0	1	0	1	0	1	0	0	0	0	0	0	0	0	0	0	0
ENSG00000072210	55	7	17	25	2	16	21	0	37	1	14	52	1	39	1	0	8	57	2	83	61	0	0	0	0	5	2	0	0	70	7	8	1	0	4	6	9	1	1	8	1	1	17	2	2	10	46	18	1
ENSG00000072274	10	22	15	6	4	10	5	0	6	0	7	110	8	132	9	1	5	15	42	182	240	0	0	0	0	1	0	0	0	0	22	2	6	6	3	4	5	2	0	5	1	7	21	3	1	0	24	16	2
ENSG00000072310	0	0	0	2	0	1	0	0	0	0	0	1	0	0	0	0	0	0	0	6	0	0	0	0	0	1	0	1	0	1	0	0	0	0	0	0	1	0	0	0	0	0	0	4	1	3	3	0	0
ENSG00000072315	0	0	0	0	0	0	0	0	0	0	0	0	0	0	0	0	0	0	0	0	0	0	0	0	0	0	0	0	0	0	0	0	0	0	0	0	0	0	0	0	0	0	0	0	0	0	0	0	0
ENSG00000072364	28	12	16	43	4	9	31	0	12	17	11	39	28	29	2	8	14	23	16	26	25	64	0	0	0	1	36	32	51	13	15	15	9	6	13	13	11	7	10	17	10	9	28	7	6	4	29	8	12
ENSG00000072401	97	7	2	7	12	39	51	1	15	4	10	25	7	61	0	0	3	0	3	121	61	62	14	38	2	55	1	19	0	91	6	4	8	5	2	2	3	0	0	7	8	0	26	5	1	0	49	10	20
ENSG00000072415	5	8	19	18	4	6	8	0	12	23	25	27	29	16	3	0	1	32	1	5	22	26	0	11	1	0	36	36	15	6	4	7	12	1	9	6	9	1	5	5	11	10	3	3	3	1	17	2	2
ENSG00000072422	15	29	43	8	49	33	77	20	5	173	109	97	137	164	77	110	98	119	231	90	110	29	46	59	37	139	185	188	162	141	40	43	45	36	7	24	21	19	31	25	14	26	41	52	39	18	12	9	35
ENSG00000072444	0	0	0	0	0	0	0	0	0	0	0	0	0	0	0	0	0	0	0	0	0	0	0	0	0	0	0	0	0	0	0	0	0	0	0	0	0	0	0	0	0	0	0	0	0	0	0	0	0
ENSG00000072501	89	79	31	63	29	61	44	48	161	27	144	278	96	357	58	29	26	183	242	402	311	1	0	13	22	126	99	69	142	112	63	27	44	41	20	22	19	19	25	30	60	44	94	19	18	41	82	106	37
ENSG00000072506	91	10	11	37	24	39	88	2	311	7	46	153	20	111	8	8	20	49	44	121	134	3	1	37	18	42	36	39	55	85	32	3	7	9	1	6	12	12	7	5	9	9	67	9	5	8	55	69	6
ENSG00000072518	8	6	0	10	2	7	13	29	2	0	14	32	1	47	1	3	12	31	23	29	6	1	0	0	0	1	0	1	0	2	3	13	6	3	0	5	2	2	4	7	19	8	15	2	0	6	10	21	6
ENSG00000072571	1	0	4	0	0	0	0	0	151	4	9	14	15	2	3	0	1	4	25	0	9	0	0	0	0	0	0	0	0	23	0	0	4	2	0	6	0	1	1	2	0	7	5	0	0	0	11	4	0
ENSG00000072609	0	2	0	0	5	9	18	1	11	16	26	30	2	29	1	0	0	0	39	43	38	0	0	0	16	38	47	10	55	11	20	1	1	3	0	4	4	2	11	1	1	4	9	13	1	12	41	11	5
ENSG00000072657	0	0	0	0	3	2	1	6	0	2	6	22	0	0	0	4	1	5	0	15	9	1	0	4	0	0	1	1	0	0	11	0	0	0	0	0	0	0	0	1	6	0	0	6	0	1	0	2	1
ENSG00000072682	2	0	0	0	0	0	0	0	0	0	0	0	0	0	0	0	0	0	0	0	0	0	0	0	0	0	0	0	0	0	0	1	0	0	0	1	2	0	0	1	0	0	0	0	0	2	0	0	0
ENSG00000072694	17	7	2	5	0	9	10	3	13	6	8	26	0	6	0	1	3	20	7	62	23	0	0	0	0	15	20	8	7	21	0	1	0	1	0	0	1	0	2	0	2	3	10	1	0	2	4	9	1
ENSG00000072736	11	18	2	6	4	5	11	9	1	5	37	89	20	50	23	15	38	44	35	182	83	0	0	7	6	2	0	7	0	17	14	13	29	13	7	3	3	8	9	1	2	8	43	9	3	16	27	20	6
ENSG00000072756	22	13	23	16	10	29	30	50	0	32	81	125	54	92	17	15	8	88	75	118	148	59	81	31	23	81	99	99	33	28	4	5	12	4	1	13	1	8	8	1	15	1	22	14	6	8	23	44	7
ENSG00000072778	86	84	61	54	37	89	209	9	36	111	53	199	61	298	87	101	148	119	227	239	244	109	52	25	70	122	275	267	113	160	38	69	54	46	37	39	40	21	26	53	50	69	127	63	24	79	92	76	67
ENSG00000072786	21	38	28	10	11	22	8	2	22	2	34	233	57	248	6	6	19	56	107	495	309	0	2	0	0	8	2	19	5	29	32	19	3	22	4	11	7	3	13	8	7	14	82	12	14	10	62	69	13
ENSG00000072803	6	11	4	10	11	35	26	13	19	46	25	48	54	31	14	32	11	44	14	48	26	26	5	2	1	7	39	100	32	37	13	8	29	13	14	4	6	4	9	9	3	12	19	25	5	8	12	17	19
ENSG00000072818	89	22	57	76	33	71	96	96	127	8	68	190	22	377	41	26	26	279	187	540	282	56	25	14	19	239	127	187	28	532	19	53	93	41	15	49	21	41	32	36	35	86	89	58	37	88	202	96	34
ENSG00000072832	0	0	0	0	0	0	0	0	0	0	1	0	0	0	0	0	0	0	0	0	0	0	0	0	0	0	0	0	0	0	0	0	0	0	0	0	0	0	0	0	0	0	0	0	0	0	0	0	0
ENSG00000072840	0	0	0	0	0	0	0	0	0	0	0	0	0	0	0	0	0	0	0	0	0	0	0	0	0	0	0	0	0	0	0	0	0	0	0	0	0	0	0	0	0	0	0	0	0	0	0	0	0
ENSG00000072849	139	46	34	42	12	102	98	102	309	52	120	228	54	215	26	25	52	113	59	150	260	86	25	6	43	164	198	135	78	160	28	19	26	15	3	17	27	10	17	9	23	17	68	25	16	25	81	56	12
ENSG00000072858	2	13	21	2	1	25	22	2	11	70	39	40	69	53	3	7	47	70	26	87	62	1	1	3	0	2	3	1	7	13	8	11	14	10	4	7	2	1	6	7	11	4	12	43	10	16	6	17	5
ENSG00000072864	34	22	17	30	7	16	25	57	32	30	34	81	17	94	21	4	20	49	61	123	117	8	10	18	0	28	8	19	40	40	15	13	13	11	9	5	3	5	4	8	10	7	50	19	4	21	37	42	13
ENSG00000072952	5	10	1	9	1	31	22	10	0	12	18	12	6	11	7	3	10	13	14	1	16	1	24	0	2	3	64	55	0	0	6	2	0	1	1	1	0	0	5	1	2	8	4	9	2	2	1	4	3
ENSG00000072954	7	0	0	0	0	2	0	0	0	0	0	0	0	0	1	0	0	0	0	4	2	0	0	0	0	0	0	0	0	0	0	0	0	0	0	0	0	0	0	0	0	0	0	0	0	0	0	0	0
ENSG00000072958	25	17	9	50	4	48	89	2	25	47	55	86	68	139	17	2	30	41	63	449	142	75	46	11	0	123	159	235	107	253	18	14	25	9	9	1	2	4	18	12	17	8	57	15	11	11	100	90	6
ENSG00000073008	0	0	7	0	2	0	1	0	0	0	0	0	0	4	3	0	0	0	0	14	0	0	0	0	0	0	0	0	0	0	0	0	0	0	0	0	0	0	0	0	0	0	0	0	0	0	0	5	0
ENSG00000073009	28	7	25	5	26	44	73	24	3	52	22	41	22	61	9	11	31	22	39	40	23	152	75	92	32	124	144	115	48	72	5	9	11	1	5	3	3	6	13	2	15	6	19	14	4	12	12	6	5
ENSG00000073050	40	9	42	46	19	55	79	73	124	82	83	89	74	211	30	17	32	64	63	141	116	36	31	79	49	28	49	110	133	129	15	21	14	2	3	19	4	1	37	20	9	6	90	15	11	18	40	30	7
ENSG00000073060	2	5	0	8	3	0	4	0	18	0	0	0	0	1	0	0	0	0	0	3	16	0	0	0	0	0	0	0	0	0	1	1	0	0	0	0	0	0	0	2	0	2	5	2	2	1	3	5	1
ENSG00000073067	0	0	0	0	0	0	0	0	0	0	0	0	0	0	0	0	0	0	0	0	0	0	0	0	0	0	0	0	0	0	0	0	0	0	0	0	0	0	0	0	0	0	0	0	0	0	0	0	0
ENSG00000073111	1	12	15	0	0	0	7	0	3	43	17	44	22	38	1	7	5	51	14	37	64	44	20	15	12	7	0	1	0	23	3	2	0	0	4	2	2	2	2	3	5	5	14	2	11	7	11	6	2
ENSG00000073146	0	0	0	0	0	0	0	0	0	0	0	0	0	6	0	0	0	0	0	0	7	0	0	0	0	0	0	0	0	0	1	0	0	0	1	1	1	0	0	0	0	0	0	0	0	0	0	0	0
ENSG00000073150	0	0	0	0	0	0	0	0	0	0	0	0	1	0	0	0	0	0	0	0	0	0	0	0	0	0	0	0	0	0	0	0	0	0	0	0	0	0	0	0	0	0	0	0	0	0	0	0	1
ENSG00000073169	3	0	0	1	0	3	2	0	0	0	1	5	0	9	0	0	2	23	20	6	0	0	0	0	0	0	0	0	0	0	0	3	4	1	0	1	1	2	1	0	1	0	2	1	1	0	12	5	2
ENSG00000073282	0	0	0	0	3	0	0	0	0	0	0	1	0	0	1	0	0	0	0	0	0	0	0	0	0	0	0	0	0	0	0	0	0	0	0	0	0	0	0	0	0	0	0	1	0	0	1	0	1
ENSG00000073331	15	12	3	0	0	19	2	0	3	2	3	48	1	13	3	0	2	3	34	71	59	0	0	0	0	6	2	0	0	42	0	1	8	6	2	2	0	2	1	3	3	2	6	0	2	2	16	8	6
ENSG00000073350	4	0	1	0	0	12	1	16	0	0	3	2	0	8	7	0	7	8	19	14	18	0	0	0	0	0	35	0	0	0	0	1	9	1	0	8	0	5	2	0	3	1	14	6	0	6	17	2	0
ENSG00000073417	22	19	0	3	0	4	0	0	4	0	5	1	8	21	14	7	4	13	10	24	32	0	0	2	0	0	0	0	0	1	3	8	14	5	2	5	4	0	0	4	0	4	16	1	3	2	6	6	1
ENSG00000073464	1	14	15	0	7	7	6	10	8	61	25	49	31	33	16	24	14	19	14	27	26	57	0	0	16	5	21	50	4	44	20	4	7	1	2	7	12	1	13	5	15	10	14	8	5	13	3	2	9
ENSG00000073536	5	0	0	1	0	2	0	0	22	0	6	8	0	18	0	0	0	0	22	52	32	0	0	0	0	0	0	0	0	29	0	7	1	0	0	0	0	0	0	1	0	0	9	4	0	0	3	3	0
ENSG00000073578	91	145	268	51	35	174	155	153	137	920	429	692	461	788	127	229	231	611	232	1025	1002	437	269	246	88	330	668	731	545	842	120	49	56	87	41	60	93	41	65	46	102	62	254	153	76	97	208	144	50
ENSG00000073584	48	23	27	17	31	53	50	52	83	63	101	108	62	117	35	17	25	127	56	115	144	61	27	13	32	66	125	75	82	60	25	36	22	23	16	44	26	10	32	9	19	9	63	47	25	31	63	62	18
ENSG00000073598	0	0	0	0	0	0	0	0	0	0	0	0	0	0	0	0	0	0	0	0	0	0	0	0	0	0	0	0	0	0	0	0	0	0	0	0	0	0	0	0	0	0	0	0	0	0	0	0	0
ENSG00000073605	4	3	16	2	0	1	1	0	0	1	5	18	6	36	0	0	1	60	28	47	58	0	0	0	0	0	0	1	0	1	0	4	6	2	4	4	4	7	2	6	3	12	15	10	6	3	12	15	3
ENSG00000073614	132	53	56	36	31	58	56	23	133	94	212	359	37	272	51	65	95	422	199	617	376	66	75	0	0	66	75	31	67	92	67	73	127	48	63	47	67	58	62	78	50	68	159	47	43	83	130	102	66
ENSG00000073670	0	0	0	0	0	0	0	0	0	0	0	0	0	0	0	0	0	0	0	0	0	0	0	0	0	0	0	0	0	0	0	0	0	1	1	0	0	1	0	0	0	0	0	0	0	0	0	0	0
ENSG00000073711	0	0	0	0	0	0	0	0	0	0	0	3	0	0	0	0	0	2	0	0	0	0	0	0	0	0	0	0	0	0	1	0	0	0	0	0	0	0	0	0	0	0	0	0	0	0	2	0	0
ENSG00000073712	0	0	0	0	0	0	0	0	0	0	3	0	0	0	0	1	0	0	0	0	1	1	0	0	0	0	0	0	0	0	0	0	0	0	0	0	0	0	0	0	0	3	0	1	0	0	0	0	0
ENSG00000073734	0	0	0	0	0	0	0	0	0	0	0	0	0	0	0	0	0	0	0	0	0	0	0	0	0	0	0	0	0	0	0	0	0	0	0	0	0	0	0	0	0	0	0	0	0	0	0	0	0
ENSG00000073737	17	0	0	0	0	13	4	0	0	5	0	19	0	1	1	0	0	0	0	9	39	0	0	0	0	28	0	0	6	7	0	0	0	0	3	1	0	0	0	0	0	1	5	0	2	0	10	1	1
ENSG00000073754	0	0	0	0	0	0	1	0	0	0	0	0	0	0	0	0	0	0	0	0	0	0	0	0	0	0	7	0	0	0	1	0	0	0	0	0	0	0	0	0	0	0	0	0	0	0	0	0	0
ENSG00000073756	6	19	1	0	0	0	4	0	0	0	2	9	1	3	0	1	0	3	0	44	34	0	0	0	0	0	0	0	0	0	0	0	0	0	1	2	0	0	0	4	1	0	3	0	0	0	6	8	8
ENSG00000073792	23	31	22	23	20	37	52	48	5	141	94	65	73	118	44	127	66	71	151	51	60	110	39	7	15	21	76	35	79	25	32	17	25	25	6	10	32	7	28	15	26	9	46	60	19	16	8	15	42
ENSG00000073803	19	10	3	1	3	22	12	7	6	9	19	25	7	18	2	2	3	12	9	14	20	0	18	11	0	13	15	18	12	18	15	1	7	4	6	4	4	1	8	10	0	0	12	6	2	12	12	8	1
ENSG00000073849	6	44	40	13	4	6	11	16	11	218	83	198	100	324	22	42	155	103	109	251	217	7	13	4	1	27	2	23	22	18	30	8	26	11	17	15	29	25	20	8	21	20	85	72	22	31	33	81	9
ENSG00000073861	1	0	0	0	1	0	3	6	0	1	2	1	0	1	0	0	0	3	1	10	2	0	0	0	0	0	0	0	0	1	0	0	3	1	4	1	2	0	3	0	1	2	6	6	2	1	6	1	0
ENSG00000073905	0	0	0	0	0	0	0	0	0	0	0	0	0	0	0	0	0	0	0	1	0	0	0	0	0	0	0	0	0	0	0	0	0	0	0	0	0	0	0	0	0	0	0	0	0	0	0	0	0
ENSG00000073910	22	6	0	0	4	2	8	0	0	0	6	62	26	27	4	0	9	20	20	105	77	0	0	0	0	0	1	21	0	0	29	7	3	2	3	5	14	7	3	11	16	4	15	7	0	5	8	11	13
ENSG00000073921	73	53	16	41	23	51	34	42	18	18	65	198	40	94	16	19	24	49	185	226	149	17	47	13	45	98	7	4	69	15	53	29	39	15	35	13	15	15	21	27	21	23	66	23	10	25	39	40	36
ENSG00000073969	5	6	0	0	1	1	2	0	60	10	51	135	1	199	11	11	23	42	23	230	329	0	6	0	0	6	0	7	1	34	3	0	5	3	1	2	5	1	3	1	1	4	19	16	0	9	21	34	0
ENSG00000074047	0	0	0	0	0	0	0	0	0	0	0	0	0	0	0	0	0	0	0	0	0	0	0	0	0	0	0	0	0	0	0	0	0	0	0	0	0	0	0	0	0	0	0	0	0	0	0	0	0
ENSG00000074054	10	12	11	7	4	13	4	8	7	126	184	196	116	175	22	45	73	49	130	373	241	2	1	0	2	3	2	27	3	4	33	22	26	25	10	7	18	7	17	19	29	3	51	51	7	41	38	55	12
ENSG00000074071	17	1	12	11	4	12	21	2	19	8	2	15	7	38	4	1	3	2	8	22	24	8	19	6	8	32	16	34	28	50	6	3	3	7	0	1	5	4	5	4	5	1	5	9	3	0	9	6	5
ENSG00000074181	0	0	0	0	0	0	0	0	0	0	0	0	0	0	0	0	0	0	3	0	0	0	0	0	0	0	0	0	0	0	0	0	0	0	0	0	1	0	0	0	0	0	0	0	0	0	0	0	0
ENSG00000074201	224	40	10	22	21	101	82	120	186	28	164	295	51	298	15	24	27	168	65	337	327	24	15	57	108	145	61	69	94	584	31	17	46	18	9	10	1	14	12	16	16	12	90	14	10	38	91	71	13
ENSG00000074211	0	0	0	0	0	0	0	0	0	0	0	0	0	0	0	0	0	0	0	0	0	0	0	0	0	0	0	0	0	0	0	0	0	0	0	0	0	0	0	0	0	0	0	0	0	0	0	0	0
ENSG00000074219	1	3	0	0	3	1	2	0	0	0	0	6	0	0	0	0	0	0	3	3	1	0	0	0	0	0	0	0	0	10	0	1	0	0	0	0	0	0	0	1	0	0	0	1	0	0	2	1	0
ENSG00000074266	27	17	15	11	10	2	7	81	110	1	65	188	26	189	15	32	19	44	30	231	314	4	3	0	0	70	86	52	9	98	24	9	11	6	4	9	15	7	16	5	7	4	41	16	3	15	60	38	19
ENSG00000074276	0	0	0	0	0	0	0	0	0	0	0	0	8	0	0	0	0	0	0	0	0	0	0	0	0	0	0	0	0	0	0	0	0	0	0	0	0	0	0	0	0	0	0	0	0	0	0	0	0
ENSG00000074317	0	0	0	0	0	0	0	0	0	0	0	0	0	0	0	0	0	0	0	0	0	0	0	0	0	0	0	0	0	0	0	0	0	0	0	0	0	0	0	0	0	0	0	0	0	0	0	0	0
ENSG00000074319	267	50	58	85	50	220	181	149	134	133	171	405	107	316	46	68	65	315	93	344	296	286	136	214	161	273	512	398	286	448	47	22	33	34	8	18	47	16	48	37	23	21	115	91	11	41	133	83	33
ENSG00000074356	43	1	0	16	3	61	21	1	15	2	28	40	18	17	2	0	17	25	5	54	55	0	1	3	18	46	6	22	63	9	22	10	25	2	3	8	6	1	3	1	12	6	22	9	6	12	22	19	17
ENSG00000074370	31	123	85	26	61	126	117	102	10	300	271	262	374	657	103	240	231	125	301	273	191	85	22	55	50	105	286	166	141	72	104	38	58	30	25	20	62	32	193	40	38	71	109	181	90	112	28	76	42
ENSG00000074410	0	0	0	0	0	0	0	0	0	0	0	0	0	0	0	0	0	0	0	0	0	0	0	0	0	0	0	0	0	0	0	0	0	0	0	0	0	0	0	0	0	0	0	0	0	0	0	0	0
ENSG00000074416	724	396	518	519	1051	2336	3618	3884	770	2127	1025	1475	1800	1277	628	1127	1261	996	1542	1289	1173	4147	2585	2367	2077	2856	6191	5724	4224	3121	384	296	241	195	254	132	308	176	466	177	430	341	566	867	396	494	101	455	379
ENSG00000074527	0	1	0	0	0	0	0	0	0	0	0	0	0	0	0	0	0	0	0	0	0	0	0	0	0	0	0	0	0	0	0	0	0	0	0	0	0	0	0	0	0	0	0	0	0	0	0	0	0
ENSG00000074582	14	0	1	2	8	30	22	23	41	0	5	67	8	53	0	0	1	30	17	73	58	0	0	6	0	0	5	1	39	59	0	7	0	0	0	4	9	0	0	5	0	5	27	13	0	3	11	22	3
ENSG00000074590	0	0	0	0	0	0	0	0	0	0	0	0	0	0	0	0	0	0	0	0	0	0	0	0	0	0	0	0	0	0	0	0	0	0	0	0	0	0	0	0	0	0	0	0	0	0	0	0	0
ENSG00000074603	46	39	59	25	32	38	47	64	20	75	114	206	115	172	65	108	35	157	193	226	197	90	101	0	47	88	98	78	114	15	10	22	45	14	20	21	23	10	23	41	33	16	64	45	19	51	60	54	26
ENSG00000074621	0	0	0	0	2	5	0	0	0	2	3	4	0	1	0	1	0	3	0	2	2	0	0	0	0	0	0	0	0	0	1	1	0	1	2	0	0	0	0	5	1	5	2	1	0	2	1	2	5
ENSG00000074657	2	0	7	0	1	0	0	0	0	0	2	1	3	7	0	0	0	5	1	5	17	0	0	0	0	0	0	0	0	3	0	0	5	0	0	1	3	1	0	0	0	0	0	0	0	1	1	4	0
ENSG00000074660	0	0	0	0	1	0	2	0	0	2	4	0	0	3	1	0	0	3	0	0	1	1	0	1	1	0	1	0	0	8	1	4	2	0	0	0	0	0	1	0	1	0	3	0	0	0	0	1	1
ENSG00000074695	162	48	65	159	50	105	88	199	316	135	170	215	168	261	73	50	93	113	104	347	262	60	144	162	132	152	256	233	159	258	71	46	20	21	39	29	42	26	64	38	22	52	71	46	27	52	75	68	17
ENSG00000074696	37	13	9	1	19	35	12	0	68	8	78	178	68	113	1	0	50	67	48	165	121	0	19	14	36	8	53	51	0	47	12	7	17	8	12	3	1	7	1	0	10	3	55	3	7	16	35	30	2
ENSG00000074706	20	26	42	26	5	10	10	22	6	107	128	176	104	234	36	29	52	154	91	155	201	89	18	45	41	85	33	110	44	108	40	13	33	26	13	14	15	24	12	10	23	15	53	53	10	33	58	38	7
ENSG00000074755	19	7	34	2	6	14	14	23	24	44	50	54	44	25	8	30	41	112	33	143	137	3	1	0	1	3	34	0	6	31	14	3	9	12	6	10	4	8	19	24	16	16	18	22	10	20	17	11	7
ENSG00000074771	0	0	0	0	0	1	0	0	0	0	0	0	0	0	0	0	0	0	0	0	0	0	0	0	0	0	0	0	0	0	0	0	0	0	0	0	0	0	0	0	0	0	0	0	0	0	0	0	0
ENSG00000074800	1834	850	701	575	949	2356	3304	1975	1682	2418	1922	3691	2183	4028	806	1258	1465	1460	2151	4024	6358	3733	1463	2361	1986	5457	5547	4925	4406	4089	1014	249	452	266	306	211	381	225	454	238	480	234	1157	1168	293	430	848	1037	328
ENSG00000074803	0	0	0	0	0	0	0	0	0	0	0	0	0	0	0	0	0	0	0	0	0	0	0	0	0	0	0	0	0	0	0	0	0	0	0	0	0	0	0	0	0	1	0	0	0	0	2	0	0
ENSG00000074842	81	22	4	33	16	81	84	22	248	5	30	94	8	59	1	1	6	24	43	106	138	0	0	0	0	121	26	12	1	107	15	12	7	6	6	9	5	2	0	9	1	13	52	2	3	5	56	37	7
ENSG00000074855	0	0	0	0	0	0	0	0	0	0	4	0	2	2	0	0	0	6	0	0	1	0	0	0	0	1	0	0	0	0	0	0	0	0	0	1	0	0	0	0	0	0	0	0	0	0	1	0	0
ENSG00000074935	4	0	16	0	0	0	1	4	5	0	34	39	9	110	0	0	3	36	18	66	69	32	0	1	0	0	5	0	0	18	0	11	1	1	4	0	1	5	3	4	0	0	6	1	1	1	18	33	0
ENSG00000074964	0	14	6	0	3	11	9	0	5	0	9	8	0	19	0	0	0	2	15	61	4	0	0	0	0	0	0	0	0	0	0	1	0	0	1	0	0	0	1	5	0	2	8	1	1	0	14	5	6
ENSG00000074966	95	19	12	20	11	18	15	9	22	27	227	479	70	497	34	50	36	144	102	473	528	136	16	0	2	52	35	38	8	77	28	20	61	17	13	29	9	12	23	22	15	16	117	48	11	38	63	90	12
ENSG00000075035	0	0	0	0	0	0	0	0	0	0	0	0	0	0	0	0	0	0	0	0	0	0	0	0	0	0	0	0	0	0	0	0	0	0	0	0	0	0	0	0	0	0	0	0	0	0	0	0	0
ENSG00000075043	0	0	0	0	0	0	0	0	0	0	0	0	0	0	0	0	0	0	0	0	0	0	0	0	0	0	0	0	0	0	0	0	0	0	0	0	0	0	0	0	0	0	0	0	0	0	0	0	0
ENSG00000075073	0	0	0	0	0	0	0	0	0	0	0	0	0	0	0	0	0	0	0	0	0	0	0	0	0	0	0	0	0	0	0	0	0	0	0	0	0	0	0	0	0	0	0	0	0	0	0	0	0
ENSG00000075089	31	38	7	68	18	33	56	16	32	0	96	172	40	222	13	0	17	100	42	209	191	0	0	63	76	26	49	62	97	91	22	9	28	11	0	4	17	9	15	4	14	5	50	32	11	27	25	47	13
ENSG00000075131	23	0	0	0	0	13	11	8	62	7	16	15	0	12	1	1	0	10	0	10	5	0	0	0	0	4	0	38	0	15	0	0	0	3	0	3	0	0	0	1	1	1	8	1	7	4	1	7	1
ENSG00000075142	225	65	12	51	22	123	121	34	133	31	112	279	43	268	17	10	22	107	100	329	321	41	55	41	62	143	117	80	95	350	53	12	26	6	4	11	32	10	25	14	14	9	106	36	15	26	128	119	22
ENSG00000075151	176	246	493	114	197	301	425	473	296	1271	976	907	1136	899	303	697	814	847	910	831	1068	415	435	219	227	378	316	632	355	392	277	167	210	94	117	91	311	99	209	108	125	196	313	354	143	246	78	226	167
ENSG00000075188	60	12	2	18	2	17	17	26	115	6	31	142	0	62	8	11	0	26	0	102	93	0	0	0	0	144	0	0	0	91	1	3	2	0	0	2	0	1	3	0	1	11	31	1	0	20	37	27	3
ENSG00000075213	2	0	0	3	0	0	0	0	0	0	0	0	0	0	0	0	2	0	0	15	15	0	0	0	0	0	0	0	0	0	0	0	0	0	0	0	0	0	0	0	0	1	0	0	0	0	0	0	0
ENSG00000075218	0	0	0	0	0	1	0	0	9	0	0	0	0	0	0	0	3	0	0	0	0	0	0	15	0	0	18	0	0	0	0	0	8	0	0	0	1	0	0	0	1	0	0	0	0	0	1	0	0
ENSG00000075223	1	2	0	2	0	1	1	0	0	0	6	0	0	1	0	0	0	0	0	29	20	0	0	0	0	0	0	0	0	0	0	0	1	0	0	0	1	0	0	0	0	0	0	1	0	0	7	7	0
ENSG00000075234	48	6	2	3	2	9	18	22	43	31	23	119	5	42	20	5	8	2	35	195	226	0	0	29	2	7	44	27	4	21	5	0	5	11	0	7	4	6	13	0	1	0	28	2	9	14	54	53	8
ENSG00000075239	104	37	14	22	3	9	37	0	347	5	53	142	18	169	0	0	10	97	76	249	260	56	70	0	0	68	36	68	66	293	31	2	40	11	3	7	15	17	4	12	8	9	125	15	0	11	54	71	2
ENSG00000075240	1	0	0	0	0	0	7	0	0	0	0	5	0	0	0	0	0	0	0	1	1	0	0	0	0	0	0	0	0	0	0	1	0	0	0	0	0	0	0	0	0	0	0	0	0	0	0	2	2
ENSG00000075275	0	0	1	0	0	0	8	0	0	0	0	0	0	0	0	0	0	8	0	4	16	0	0	0	0	0	0	0	0	0	1	0	0	1	0	0	0	0	0	3	0	0	1	1	0	0	0	1	0
ENSG00000075290	0	0	0	0	0	0	0	0	0	0	0	0	0	0	0	0	0	0	0	0	0	0	0	0	0	0	0	0	0	0	0	0	0	0	0	0	0	0	0	0	0	0	0	0	0	0	0	0	0
ENSG00000075292	130	73	68	83	27	98	47	46	117	73	188	373	105	485	63	60	83	268	194	609	436	64	88	139	5	118	62	41	2	149	70	31	95	56	53	44	40	45	35	15	39	68	93	47	24	87	92	94	51
ENSG00000075303	17	32	7	1	0	8	2	0	0	49	32	113	47	84	18	8	1	73	2	139	98	0	0	0	3	1	0	10	0	0	13	6	10	0	3	3	8	1	9	0	0	1	38	4	2	4	3	18	2
ENSG00000075336	20	6	0	0	1	16	6	0	53	2	19	24	1	46	4	1	3	12	11	87	91	0	0	0	0	43	3	39	13	37	5	5	3	0	5	2	0	2	6	0	0	1	9	7	2	0	16	13	3
ENSG00000075340	2	1	0	0	0	0	3	0	0	0	7	0	0	3	0	0	0	21	8	11	0	0	0	23	0	0	0	0	0	0	3	0	0	3	1	0	0	2	0	0	0	0	1	0	0	1	7	1	0
ENSG00000075388	0	0	0	0	0	0	0	0	0	0	0	0	0	0	0	0	0	0	0	0	0	0	0	0	0	0	0	0	0	0	0	0	0	0	0	0	0	0	0	0	0	0	0	0	0	0	0	0	0
ENSG00000075391	2	0	1	0	0	8	0	0	0	0	1	0	0	7	0	1	2	1	0	0	10	0	2	0	0	0	1	0	0	0	1	0	1	1	0	0	0	0	2	1	0	0	2	1	2	0	1	2	0
ENSG00000075399	0	0	0	0	1	1	13	0	2	0	1	0	2	2	0	4	6	5	0	8	4	2	0	0	8	2	9	2	6	12	2	1	2	2	0	0	2	0	2	1	2	4	1	1	4	1	2	0	2
ENSG00000075407	0	0	0	14	0	3	0	0	0	10	3	50	8	51	3	6	2	3	9	10	28	0	0	0	0	0	31	42	6	7	0	8	2	0	0	3	3	2	1	0	0	0	13	5	0	3	0	12	0
ENSG00000075413	23	9	14	96	14	29	34	22	37	88	229	77	68	108	29	68	52	57	126	75	194	116	79	36	55	18	114	2	0	36	41	20	57	20	58	24	16	28	19	19	38	44	27	19	4	36	36	30	27
ENSG00000075415	382	54	30	97	82	271	256	305	526	152	192	346	129	267	36	45	66	245	178	391	416	159	35	236	174	432	414	324	276	611	58	34	60	21	8	27	45	23	60	48	28	32	134	43	41	55	212	181	39
ENSG00000075420	29	13	0	34	3	12	10	0	5	0	5	29	3	73	7	5	5	22	4	127	62	0	0	12	0	21	0	10	1	0	3	13	6	2	0	15	1	6	5	0	3	1	31	15	2	2	16	16	9
ENSG00000075426	2	0	0	10	3	2	5	0	18	1	0	4	0	2	0	0	0	1	1	1	3	0	0	0	0	7	0	0	3	0	4	3	0	0	0	0	0	1	0	0	0	2	3	1	0	1	1	3	1
ENSG00000075429	0	0	0	0	0	0	0	0	0	0	0	0	0	0	0	0	0	0	0	0	0	0	0	0	0	0	0	0	0	0	0	0	0	0	0	0	0	0	0	0	0	0	0	0	0	0	0	0	0
ENSG00000075461	0	0	0	0	0	0	0	0	0	0	0	0	0	0	0	0	0	0	0	0	0	0	0	0	0	0	0	0	0	0	0	0	0	0	0	0	0	0	0	0	0	0	0	0	0	0	0	0	0
ENSG00000075539	41	12	16	48	9	30	21	4	27	64	99	315	59	168	62	52	48	168	148	321	351	3	6	1	1	75	0	4	12	23	46	33	43	10	49	12	39	13	16	15	12	31	58	28	11	38	46	57	26
ENSG00000075568	43	22	7	26	8	39	28	23	86	4	41	81	10	112	5	15	18	75	36	162	190	0	1	0	0	6	7	7	0	3	14	17	30	10	8	11	10	4	16	10	13	23	55	16	14	20	48	57	14
ENSG00000075618	0	0	0	0	1	0	0	0	0	0	0	0	0	0	0	0	1	0	0	0	0	0	0	0	0	0	0	0	0	0	0	0	0	0	0	0	0	0	0	0	0	0	0	0	0	1	0	0	0
ENSG00000075624	14061	12616	22338	10608	10196	34825	58476	67624	14929	65988	66152	56115	60249	62878	15303	31638	41189	26987	44438	58171	77426	77139	83119	60590	40956	95732	129214	119784	96901	96327	17918	10597	13353	10147	9438	6576	14166	5824	20426	7749	16879	12949	27149	30233	14267	14361	12210	20255	11694
ENSG00000075643	0	0	0	0	0	0	0	0	0	0	0	0	0	0	0	0	0	0	0	8	0	0	0	0	0	0	0	0	0	0	0	0	0	0	0	0	0	0	0	1	0	0	1	0	0	0	0	0	0
ENSG00000075651	0	1	0	0	0	5	3	0	0	0	5	18	0	16	0	2	20	9	3	84	15	0	0	0	0	0	0	0	2	0	0	0	2	0	4	0	2	4	0	3	1	0	10	0	1	0	4	9	3
ENSG00000075673	0	0	0	0	0	0	0	0	0	0	0	0	0	0	0	0	0	0	1	0	0	0	0	0	0	0	0	0	0	0	0	0	0	0	0	0	0	0	0	0	0	0	0	0	0	0	0	1	0
ENSG00000075702	0	0	0	0	8	0	0	0	0	0	1	3	0	0	3	0	0	0	0	7	0	0	0	0	0	0	0	0	0	0	0	0	0	0	0	0	0	0	0	0	0	0	8	0	0	0	2	0	1
ENSG00000075711	50	24	42	46	20	13	41	63	44	87	92	81	64	153	27	102	26	131	86	111	89	53	4	0	13	2	3	13	55	3	20	28	29	25	0	7	10	15	9	8	12	13	49	14	29	36	10	17	28
ENSG00000075785	308	70	100	137	115	252	418	218	370	281	339	471	249	415	136	157	127	245	229	780	482	478	390	373	161	839	892	772	582	518	130	65	73	37	38	28	42	43	51	29	109	37	159	96	42	79	159	161	74
ENSG00000075790	131	61	89	74	82	192	137	235	183	255	222	210	150	185	80	101	164	194	194	261	229	67	29	205	141	214	323	323	325	220	92	19	53	29	65	43	47	16	80	21	34	40	138	43	29	32	41	34	70
ENSG00000075826	4	8	0	0	2	2	0	0	2	0	4	43	12	95	16	7	8	32	5	124	93	0	0	0	0	0	0	0	0	2	0	2	9	0	0	2	0	2	1	11	4	1	7	1	0	8	10	8	0
ENSG00000075856	36	58	80	22	6	50	20	15	64	204	133	274	72	171	0	29	40	154	94	292	353	5	1	55	37	0	87	142	67	114	28	42	34	17	24	16	4	27	13	6	8	8	51	17	6	9	51	30	16
ENSG00000075884	447	169	104	314	54	172	166	125	438	78	863	1006	224	1182	44	68	47	690	277	1572	1154	149	1	6	39	93	75	97	114	504	138	133	200	74	36	93	126	97	42	108	43	62	403	125	36	206	327	306	109
ENSG00000075886	0	0	0	0	0	0	0	0	0	0	0	0	0	0	0	0	0	0	0	0	0	0	0	0	0	0	0	0	0	0	0	0	0	0	0	0	0	0	0	0	0	0	0	0	0	0	0	0	0
ENSG00000075891	0	0	0	0	0	0	0	0	0	0	0	0	0	0	0	0	0	0	0	0	0	0	0	0	0	0	0	0	0	0	0	0	0	0	0	0	0	0	0	0	0	0	0	0	0	0	0	0	0
ENSG00000075914	39	10	15	9	11	14	28	7	79	0	34	58	6	64	3	1	9	30	28	53	58	18	28	0	0	0	25	9	30	51	3	3	13	1	6	7	11	6	2	6	2	7	32	5	0	13	35	23	10
ENSG00000075945	102	193	391	74	61	90	56	126	67	666	736	927	974	449	191	418	265	668	607	853	936	718	180	477	403	319	331	546	544	564	196	156	67	32	56	87	107	83	126	81	144	73	277	161	59	184	144	201	82
ENSG00000075975	9	8	0	0	0	4	3	0	6	5	25	75	4	87	0	7	0	7	0	139	103	0	15	0	0	5	11	4	11	35	11	2	16	0	0	0	0	0	4	6	0	1	41	1	4	0	24	16	2
ENSG00000076003	16	55	164	12	11	18	33	1	86	395	340	226	181	322	48	106	95	131	86	56	234	121	149	137	58	191	155	212	197	136	113	45	81	59	21	9	34	40	23	41	32	13	95	71	19	55	70	47	83
ENSG00000076043	40	7	67	29	47	123	103	119	73	76	131	82	73	112	19	34	41	77	59	109	117	72	61	83	64	123	224	222	152	214	17	20	24	11	12	17	13	6	2	16	25	11	47	12	15	18	24	23	23
ENSG00000076053	0	0	0	0	0	0	0	0	0	4	0	0	0	0	0	0	0	0	0	0	0	0	0	0	0	0	0	0	0	0	0	0	0	0	0	0	0	0	0	0	0	0	0	0	0	0	0	0	0
ENSG00000076067	6	8	2	3	7	0	12	11	0	30	2	6	8	7	10	2	2	0	28	16	30	0	0	0	0	0	1	35	0	0	0	4	7	2	1	1	1	8	3	3	5	12	5	0	4	2	4	16	2
ENSG00000076108	57	65	38	38	19	39	47	15	91	33	67	87	52	139	24	49	75	153	267	279	208	4	19	1	0	71	58	8	29	24	28	62	61	43	44	34	62	22	26	59	40	49	78	61	23	48	50	39	68
ENSG00000076201	5	0	4	7	1	20	8	1	0	0	1	25	4	20	7	2	4	30	9	32	2	0	0	0	40	0	0	0	0	2	8	1	11	1	8	1	0	1	2	2	8	4	9	1	0	7	9	10	3
ENSG00000076242	15	21	0	11	1	17	18	3	44	11	67	223	61	193	47	28	16	111	9	296	298	37	43	68	0	47	0	43	42	33	11	0	10	24	37	14	8	4	14	11	5	8	56	6	7	24	35	95	10
ENSG00000076248	1	3	9	0	1	0	1	1	35	0	1	11	1	15	0	0	0	1	7	19	11	0	0	35	0	0	0	3	1	32	2	1	5	0	1	1	0	0	1	1	0	1	5	2	1	4	9	10	3
ENSG00000076258	4	0	0	0	0	4	0	0	0	3	25	23	5	3	1	0	0	0	0	14	17	0	0	0	0	0	29	0	0	2	0	0	1	0	0	0	2	0	2	0	1	0	0	0	0	0	5	1	1
ENSG00000076321	16	11	0	0	0	7	2	0	69	8	7	30	0	71	10	11	10	28	0	113	98	0	0	0	0	0	21	0	0	2	6	11	7	0	15	6	0	6	2	3	0	2	19	2	5	1	24	17	3
ENSG00000076344	0	0	0	0	0	0	0	0	0	0	0	0	0	0	0	0	0	0	0	0	0	0	0	0	0	0	0	0	0	0	0	0	0	0	0	0	0	0	0	0	0	0	0	0	0	0	0	0	0
ENSG00000076351	0	0	0	0	0	0	0	0	0	0	0	0	0	0	0	0	0	0	0	0	0	0	0	0	0	0	0	0	0	0	0	0	0	0	1	0	1	0	0	0	0	0	0	0	0	0	0	0	0
ENSG00000076356	3	12	0	0	5	5	1	0	0	44	34	21	10	43	1	12	19	0	15	22	17	1	0	0	11	36	18	41	5	2	4	5	6	8	0	1	0	2	0	7	3	0	13	6	4	3	4	12	0
ENSG00000076382	1	6	0	0	0	0	0	0	44	24	11	3	0	26	0	0	9	0	0	22	37	0	0	0	1	0	0	0	28	0	0	0	0	0	0	0	0	4	1	3	9	4	7	0	0	3	4	7	2
ENSG00000076513	5	1	33	9	5	8	4	5	23	20	28	13	7	20	1	11	5	34	28	44	45	0	0	0	4	28	4	1	6	4	23	8	13	6	0	10	5	1	2	8	15	3	20	8	5	12	13	7	13
ENSG00000076554	29	6	0	5	4	14	17	7	26	0	25	80	6	59	0	5	12	18	11	118	48	0	3	6	7	91	0	16	0	62	8	5	8	4	0	6	2	2	6	6	5	2	8	12	0	10	17	16	5
ENSG00000076555	1	1	1	0	1	1	0	0	0	0	8	9	0	17	1	1	1	21	0	33	23	0	0	0	0	0	0	23	0	0	0	4	2	3	3	8	2	1	5	8	4	5	1	2	1	3	5	2	2
ENSG00000076604	0	0	0	0	0	0	2	0	0	0	0	0	1	0	0	1	0	0	0	0	3	0	0	4	0	1	12	2	0	1	0	0	0	0	0	0	0	0	0	0	0	0	4	0	0	3	1	0	0
ENSG00000076641	3	0	5	0	0	4	1	2	2	1	10	12	5	15	4	4	2	14	15	13	12	0	0	0	1	1	0	0	0	2	2	3	13	0	0	3	3	0	0	0	2	1	4	1	1	3	2	7	0
ENSG00000076650	23	7	4	32	9	19	10	36	8	1	36	93	3	77	44	0	12	13	1	93	130	16	2	1	0	0	0	20	13	18	4	1	17	2	4	6	4	30	8	5	4	18	41	17	4	18	30	22	7
ENSG00000076662	191	35	10	48	69	183	173	163	117	20	58	159	6	257	11	8	20	73	55	339	205	31	0	32	31	242	82	114	58	200	28	9	38	8	12	16	18	6	10	17	12	33	101	33	10	31	99	170	23
ENSG00000076685	27	18	75	102	15	40	20	52	13	229	178	282	93	388	63	106	77	224	33	332	302	60	28	22	14	164	80	94	30	86	72	16	20	9	4	19	29	10	36	16	21	16	116	48	9	50	57	48	31
ENSG00000076706	0	0	1	0	0	0	1	0	0	0	0	0	0	0	1	0	0	0	0	3	0	0	0	0	0	0	0	0	0	0	0	0	0	0	0	0	0	0	0	0	0	0	0	0	0	0	0	0	0
ENSG00000076716	0	0	0	0	0	0	0	0	0	0	0	0	0	0	0	0	0	0	0	0	0	0	0	0	0	0	0	0	0	0	0	0	0	0	0	0	0	0	0	0	0	0	0	0	0	0	0	0	0
ENSG00000076770	169	177	263	137	190	353	297	967	92	765	943	705	1049	534	233	324	381	381	498	439	660	1156	768	771	671	484	703	673	746	575	197	165	159	101	168	124	185	79	147	69	195	127	169	278	120	228	59	153	150
ENSG00000076826	0	0	1	0	0	0	0	0	0	0	0	0	0	0	0	0	0	0	0	0	0	0	0	0	0	0	0	0	0	0	0	0	0	0	0	0	0	0	0	0	0	0	0	0	0	0	0	0	0
ENSG00000076864	0	0	0	0	0	0	0	0	0	0	0	0	0	0	0	0	0	0	0	0	0	0	0	0	0	0	0	0	0	0	0	0	1	0	0	0	0	0	0	0	0	0	0	0	0	0	0	0	0
ENSG00000076924	2	11	17	7	3	4	4	7	1	37	31	35	24	118	9	6	2	50	23	69	90	0	0	0	0	6	32	29	7	4	8	17	4	10	13	11	26	15	12	12	11	13	64	6	14	17	26	23	9
ENSG00000076928	49	11	11	30	14	63	51	7	53	8	35	65	8	109	33	6	24	54	133	198	77	23	3	1	9	10	8	59	25	122	14	49	61	21	12	19	26	23	39	16	10	55	85	45	29	51	96	58	23
ENSG00000076944	155	454	524	225	285	556	720	687	295	2330	1076	1229	1326	1456	307	558	867	911	1228	1242	1456	1154	835	687	607	1121	1857	1564	1289	1295	392	278	215	240	195	135	249	127	372	183	279	224	502	593	258	295	298	332	219
ENSG00000076984	2	0	0	0	1	1	2	0	0	0	0	0	0	1	0	0	0	1	0	4	1	0	0	1	0	0	0	0	0	0	5	0	0	0	0	0	0	1	0	0	0	0	0	0	0	0	1	1	0
ENSG00000077009	0	0	0	0	0	0	0	0	0	0	0	0	0	0	0	0	0	0	0	0	0	0	0	0	0	0	0	0	0	0	0	0	0	0	0	0	0	0	0	0	0	0	0	0	0	0	0	0	0
ENSG00000077044	43	71	97	44	14	32	52	37	7	368	266	453	288	404	195	256	134	284	279	502	412	42	26	68	9	153	198	164	134	130	130	29	65	30	35	28	50	26	67	9	61	76	104	106	25	63	43	48	43
ENSG00000077063	0	0	0	0	0	0	0	0	0	0	0	0	0	0	0	0	0	0	0	0	0	0	0	0	0	0	0	0	0	0	0	0	0	0	0	0	0	0	0	0	1	0	0	0	0	0	0	0	0
ENSG00000077080	0	0	0	0	0	0	0	0	0	0	0	0	0	0	0	0	0	0	0	0	0	0	0	0	0	0	0	0	0	0	0	0	0	0	0	0	0	0	0	0	0	0	0	0	0	0	0	0	0
ENSG00000077092	0	0	0	0	0	0	0	0	0	0	0	0	0	0	0	0	0	0	0	0	0	0	0	0	0	0	2	0	1	0	0	0	0	0	0	0	0	0	0	0	0	0	0	0	0	0	0	0	1
ENSG00000077097	117	85	182	103	44	105	72	53	202	351	415	607	240	507	103	163	50	385	262	785	678	61	36	3	2	98	107	133	50	109	120	66	131	45	63	61	56	30	49	42	44	40	116	58	61	108	127	85	62
ENSG00000077147	23	16	12	5	10	21	15	13	11	9	37	82	49	65	3	22	15	61	0	89	34	0	0	9	0	5	1	11	1	7	7	4	12	2	0	5	16	14	8	10	22	2	8	17	1	8	21	25	9
ENSG00000077150	17	0	0	8	3	27	21	14	14	0	4	14	2	31	9	2	6	20	31	40	14	0	1	0	0	12	0	19	0	29	4	10	18	10	0	4	2	1	12	2	6	15	16	10	7	10	24	15	4
ENSG00000077152	3	0	0	0	2	6	2	0	37	2	10	29	7	2	1	1	0	19	7	20	11	20	0	14	0	0	0	0	0	43	2	0	8	0	7	1	0	3	0	3	1	6	3	0	0	4	12	5	2
ENSG00000077157	14	1	0	20	0	23	0	9	1	0	2	19	0	4	0	0	1	9	15	36	11	0	0	0	0	1	0	0	0	0	2	5	3	2	3	0	3	3	6	2	0	7	13	5	3	14	20	1	6
ENSG00000077232	196	64	38	99	31	63	51	17	27	29	149	434	47	561	8	5	17	163	206	723	786	0	2	18	1	35	17	1	25	131	125	15	46	18	20	16	37	19	14	23	47	32	109	25	6	16	95	140	10
ENSG00000077235	26	12	27	3	15	21	20	3	29	30	41	104	26	126	8	32	25	84	16	159	52	0	10	0	0	1	52	30	8	33	8	6	28	14	5	13	4	0	12	6	4	17	37	11	8	9	19	31	9
ENSG00000077238	16	13	12	27	12	8	27	0	7	4	4	43	4	90	0	2	8	12	15	96	47	0	0	0	0	1	5	30	4	14	6	7	3	3	3	1	5	5	4	4	6	5	32	0	0	4	18	8	5
ENSG00000077254	289	223	234	231	235	285	333	269	160	983	941	591	1110	1189	145	473	454	718	497	1146	1375	512	296	125	149	379	633	213	457	396	351	137	154	128	83	83	90	57	87	45	158	78	273	187	83	137	177	273	124
ENSG00000077264	0	0	0	0	0	0	0	0	0	0	0	0	0	0	0	0	0	0	0	4	0	0	0	0	0	0	0	0	0	0	0	0	0	0	0	0	0	0	0	0	0	0	0	0	0	2	0	0	0
ENSG00000077274	0	0	0	0	0	0	0	0	0	0	0	0	0	0	0	0	0	0	0	0	0	0	0	0	0	0	0	0	0	0	0	0	0	0	0	0	0	0	0	0	0	0	0	0	0	0	0	0	0
ENSG00000077279	0	1	1	0	0	0	0	0	0	0	0	0	0	0	0	0	0	0	0	0	0	0	0	0	0	0	0	1	0	0	1	1	0	0	0	0	0	0	0	0	0	0	0	0	0	0	0	0	0
ENSG00000077312	24	8	3	13	13	37	36	18	31	0	2	26	11	62	3	1	7	6	16	93	83	3	19	9	2	10	19	43	0	55	8	3	8	3	6	5	3	8	2	5	6	13	20	8	3	1	23	17	4
ENSG00000077327	0	0	0	0	0	6	0	0	0	0	0	0	0	0	0	0	0	0	1	0	0	0	0	0	0	0	0	0	0	0	0	0	0	0	0	0	0	0	0	0	0	0	0	0	0	0	0	0	0
ENSG00000077348	17	6	4	1	2	10	34	10	41	0	64	79	5	96	1	0	8	28	17	63	112	0	0	12	6	16	0	57	0	85	4	0	3	0	4	5	5	2	1	1	5	13	30	4	3	9	29	21	4
ENSG00000077380	87	75	46	85	123	131	85	135	117	285	267	249	166	407	109	72	100	280	116	451	440	129	91	105	70	140	299	234	196	192	60	62	42	38	45	52	58	25	70	55	65	40	124	95	42	54	86	96	73
ENSG00000077420	494	55	26	161	54	248	145	89	310	15	138	238	67	248	41	17	35	249	113	411	232	86	27	54	87	122	68	120	89	281	23	27	75	39	58	35	55	27	32	55	24	33	110	38	21	47	145	154	65
ENSG00000077454	15	0	5	13	10	35	14	5	12	15	10	0	1	4	2	0	9	11	17	28	17	0	17	0	0	32	53	27	6	15	3	6	20	11	8	4	9	5	5	18	5	13	5	2	0	7	13	17	10
ENSG00000077458	41	2	4	10	3	17	16	6	0	3	32	47	29	60	13	29	14	20	9	64	47	0	0	0	43	1	19	20	21	1	11	9	14	0	2	10	2	8	0	16	16	7	16	14	4	8	29	14	8
ENSG00000077463	2	0	0	1	2	1	6	0	0	1	4	1	0	5	0	0	1	0	0	34	2	0	0	0	0	0	0	0	0	1	0	5	0	0	0	0	1	0	1	1	0	2	3	0	0	2	1	4	0
ENSG00000077498	1	0	0	0	1	0	0	0	0	0	0	0	0	0	0	0	0	0	0	0	0	0	0	0	0	0	0	0	0	0	0	0	2	1	0	2	1	2	0	0	0	2	3	0	0	1	0	0	0
ENSG00000077514	56	6	2	6	6	93	51	23	37	6	37	71	7	56	0	0	6	63	25	75	56	0	26	0	0	0	3	13	26	51	9	2	13	5	1	1	2	2	2	15	14	10	27	7	0	4	23	12	9
ENSG00000077522	0	0	0	0	0	0	0	0	0	0	0	0	0	0	0	0	0	0	0	0	0	0	0	0	0	0	0	0	0	0	0	0	0	0	0	0	0	0	0	0	0	0	0	0	0	0	0	0	0
ENSG00000077549	1808	409	540	841	987	2223	3100	2752	1291	1534	1738	1512	1674	2002	560	773	1091	799	1217	1774	1946	2172	2103	1907	1145	4119	3892	2763	2509	3255	444	379	344	326	241	214	309	253	472	289	559	285	735	670	276	448	500	449	335
ENSG00000077585	9	4	6	0	4	1	25	1	11	36	22	21	23	37	0	12	34	40	30	16	26	29	8	27	28	22	1	1	0	18	18	0	17	6	1	2	2	7	2	2	11	3	6	11	21	6	0	9	7
ENSG00000077616	0	0	0	0	0	0	0	0	0	0	0	0	0	0	0	0	0	0	0	0	0	0	0	0	0	0	0	0	0	0	0	0	0	0	0	0	0	0	0	0	0	0	0	0	0	0	0	0	1
ENSG00000077684	1	5	0	0	0	1	1	0	0	0	8	44	0	97	2	0	3	7	14	98	57	0	0	0	0	3	0	0	0	0	1	0	1	1	0	0	0	1	1	0	3	4	10	1	3	6	12	21	0
ENSG00000077713	1	0	0	0	1	3	1	3	0	4	0	6	14	6	0	15	7	5	10	1	3	11	0	0	0	0	5	0	1	5	0	2	0	0	3	0	1	1	2	1	3	3	5	5	1	1	3	8	2
ENSG00000077721	74	47	32	31	3	40	52	52	33	72	108	222	100	145	28	48	48	118	47	243	201	87	13	49	46	146	139	117	57	166	54	9	20	18	7	10	25	3	14	8	45	15	83	37	6	21	72	64	12
ENSG00000077782	0	0	0	0	0	0	0	0	2	0	4	11	1	7	0	0	2	4	0	10	9	0	0	0	0	0	0	0	0	1	0	0	0	0	0	0	0	0	0	1	0	0	2	0	0	0	1	3	0
ENSG00000077800	0	0	0	0	0	0	0	0	0	0	0	0	0	0	0	0	0	0	0	0	0	0	0	0	0	0	0	0	0	0	0	1	0	0	0	0	0	0	0	0	0	0	0	0	0	0	0	0	0
ENSG00000077809	21	16	8	6	5	16	10	3	2	22	48	65	33	44	6	9	11	69	27	104	38	3	4	8	12	18	20	12	14	16	14	3	7	1	4	6	1	2	13	8	8	9	17	12	3	7	10	15	7
ENSG00000077935	0	0	0	0	0	0	0	0	0	0	0	0	0	0	0	0	1	0	3	0	0	0	0	0	0	0	0	0	0	0	0	0	0	0	0	0	0	0	0	0	0	0	0	0	0	0	0	0	0
ENSG00000077942	0	0	0	0	0	0	0	0	0	0	0	0	0	0	0	0	0	0	0	0	0	0	0	0	0	0	0	0	0	0	0	0	0	0	0	0	0	0	0	0	0	0	0	0	0	0	0	1	0
ENSG00000077943	0	0	0	0	0	0	0	0	0	0	0	0	0	0	2	0	0	0	0	0	0	0	0	0	0	0	0	0	0	0	0	0	0	0	0	0	0	0	0	0	0	0	0	0	0	1	0	0	0
ENSG00000077984	263	44	34	86	72	176	171	274	245	31	108	701	72	752	34	14	49	246	119	436	378	10	78	48	9	353	191	185	156	1270	79	19	47	22	17	37	84	83	39	33	27	40	112	85	33	66	218	167	21
ENSG00000078018	0	0	3	10	0	3	8	0	0	15	51	13	16	34	1	17	4	0	12	10	26	0	0	27	0	73	6	1	0	29	1	3	3	1	2	2	0	2	0	0	0	0	8	0	2	1	0	0	0
ENSG00000078043	4	10	6	3	1	2	8	1	3	12	12	19	12	16	2	7	9	2	6	29	38	0	0	0	0	1	32	1	0	3	4	3	7	12	2	2	0	3	1	1	2	4	12	5	6	9	6	10	0
ENSG00000078053	1	1	0	0	18	12	6	1	3	3	1	5	3	4	0	1	2	1	0	2	14	5	0	19	0	0	0	0	0	18	0	0	1	4	3	0	0	2	2	0	3	0	0	2	0	1	4	0	5
ENSG00000078061	45	139	46	30	21	81	137	68	26	320	271	475	310	466	119	153	131	318	369	528	705	139	128	135	136	258	434	278	342	376	100	23	58	27	62	17	30	17	69	16	47	6	144	59	52	46	153	128	37
ENSG00000078070	15	0	4	39	1	0	27	0	13	0	26	89	0	109	0	0	2	65	11	179	70	0	0	0	0	7	0	39	0	121	11	2	20	5	0	6	0	3	0	21	0	8	20	2	1	6	43	60	3
ENSG00000078081	0	2	0	0	0	0	0	0	0	0	1	2	5	4	0	0	0	0	0	4	4	0	0	0	0	0	0	0	0	7	0	1	0	0	0	0	0	0	0	0	0	0	0	0	0	0	0	3	0
ENSG00000078098	0	0	0	0	0	0	0	0	0	0	0	0	0	0	0	0	0	0	0	0	0	0	0	0	0	0	0	0	0	0	0	0	0	0	0	0	0	0	0	0	0	0	0	0	0	0	0	0	0
ENSG00000078114	0	0	0	0	0	0	0	0	0	0	0	0	0	0	0	0	0	0	0	1	0	0	0	0	0	0	0	0	0	0	0	1	0	0	0	0	1	0	1	0	0	0	1	1	0	0	0	2	0
ENSG00000078124	148	81	51	39	47	68	123	77	179	306	138	173	206	175	54	79	131	121	41	195	214	62	74	94	30	257	8	240	171	55	39	7	18	15	27	6	33	10	14	23	59	8	19	39	0	48	21	19	18
ENSG00000078140	209	55	117	399	392	397	326	578	186	474	401	284	388	339	161	170	206	301	481	235	225	1071	864	659	568	1050	830	855	922	1191	90	119	54	101	73	72	89	62	121	96	121	84	185	108	48	91	159	70	127
ENSG00000078142	73	48	133	165	61	126	70	341	204	124	250	327	61	270	97	54	79	91	143	510	359	2	50	9	2	44	161	94	44	140	52	87	71	38	11	33	12	48	44	17	44	27	120	27	30	46	83	91	40
ENSG00000078177	7	3	18	13	7	5	8	0	4	2	41	41	7	110	9	4	17	8	13	99	60	0	0	0	0	0	0	8	0	0	8	24	13	17	17	9	3	15	6	6	7	11	10	6	7	6	18	14	6
ENSG00000078237	38	6	6	4	0	11	9	23	10	5	1	31	0	36	0	0	3	0	3	30	47	0	0	0	0	0	63	0	4	28	4	1	0	1	10	1	0	0	0	1	1	5	16	2	0	2	24	19	1
ENSG00000078246	18	1	6	0	0	3	1	0	0	0	5	28	0	18	0	7	0	5	19	35	24	0	0	0	0	1	0	0	18	15	0	0	0	0	1	0	6	0	0	0	1	0	11	0	0	7	18	10	2
ENSG00000078269	17	2	6	5	1	1	12	7	6	73	20	62	96	56	0	19	5	46	33	35	99	4	10	59	6	52	10	4	11	60	1	20	24	3	2	2	6	3	0	7	8	2	15	11	4	13	6	4	5
ENSG00000078295	0	0	0	0	0	0	0	0	0	0	0	0	0	0	0	0	0	0	0	0	1	0	0	0	0	0	0	0	0	0	0	0	0	0	0	0	0	0	0	0	0	0	0	0	0	0	0	0	0
ENSG00000078304	177	65	15	49	33	51	96	68	175	126	352	425	77	476	29	39	68	273	104	820	658	63	18	2	8	15	76	87	50	128	97	10	40	55	30	39	44	29	24	23	52	37	182	62	3	66	154	173	28
ENSG00000078319	46	8	10	15	14	33	32	27	19	8	35	35	18	44	3	8	4	18	33	35	60	16	2	0	5	0	11	20	22	71	21	6	21	2	7	0	3	5	4	6	3	3	21	9	5	12	23	30	1
ENSG00000078328	0	0	0	0	0	0	0	0	0	0	0	0	0	0	0	0	0	1	0	0	0	0	0	0	0	0	0	0	0	0	0	0	0	0	0	0	0	0	0	0	0	0	0	0	0	0	1	0	0
ENSG00000078369	45	36	34	12	33	74	61	30	31	127	121	136	94	117	93	72	55	63	163	130	136	39	33	13	45	57	104	91	79	59	47	43	34	15	34	22	32	17	58	22	29	27	47	59	23	35	36	38	35
ENSG00000078399	0	0	0	0	0	0	0	0	0	0	0	0	0	0	0	0	0	0	0	0	0	0	0	0	0	0	0	0	0	0	0	0	0	0	0	0	0	0	0	0	0	0	0	0	0	0	0	0	0
ENSG00000078401	0	0	0	0	0	0	0	0	0	0	0	0	0	0	0	0	0	14	0	0	0	0	0	0	0	0	0	0	0	0	0	0	0	0	0	0	0	0	0	0	0	0	0	0	0	0	1	3	0
ENSG00000078403	20	21	13	19	8	7	22	16	13	14	51	49	11	85	21	26	24	61	4	113	47	12	0	0	0	34	3	1	12	4	9	10	13	5	9	5	17	2	3	0	8	15	40	18	10	22	33	13	13
ENSG00000078487	15	9	0	45	4	22	9	0	10	0	35	14	18	12	0	6	0	44	0	21	40	74	0	0	39	0	40	70	0	40	0	0	7	0	2	0	8	0	6	0	0	7	23	3	5	3	16	7	17
ENSG00000078549	1	0	1	0	0	0	0	0	0	0	0	0	0	0	0	0	0	0	0	0	0	0	0	0	0	0	0	0	0	0	0	0	0	0	0	0	0	0	0	0	0	0	0	0	0	0	0	0	0
ENSG00000078579	0	0	0	0	0	0	0	0	0	0	0	0	0	0	0	0	0	0	0	0	0	0	0	0	0	0	0	0	0	0	0	0	0	0	0	0	0	0	0	0	0	0	0	0	0	0	0	0	0
ENSG00000078589	11	19	2	40	16	16	27	44	6	63	61	41	27	52	11	15	20	134	31	28	38	42	16	51	13	115	14	36	16	44	30	19	20	12	1	9	6	13	8	10	11	9	40	7	3	20	12	12	14
ENSG00000078596	256	82	207	202	189	165	186	647	195	737	648	320	784	725	115	217	230	553	429	849	680	194	586	80	234	769	637	796	789	1400	146	74	180	41	53	48	104	65	112	76	157	45	213	167	24	122	134	139	46
ENSG00000078618	303	906	1013	181	186	328	344	745	379	3389	2890	2485	2679	2584	831	1731	1821	1984	1821	2906	3790	455	639	485	181	1060	1074	1223	1368	903	574	295	398	339	195	146	349	183	464	206	539	250	801	676	200	338	367	523	410
ENSG00000078668	1256	882	1387	1558	2022	2331	2289	4201	1855	6092	4553	3220	3136	2865	855	1522	1618	5147	2841	1680	3950	5349	3167	3134	2489	5684	7783	6052	4884	5303	996	677	636	740	404	539	845	481	515	420	950	362	1265	1240	414	783	1278	469	699
ENSG00000078674	226	97	53	175	69	125	108	107	241	138	335	716	194	727	86	94	104	558	415	764	714	110	55	39	39	72	61	199	180	159	93	106	210	95	101	78	109	76	91	78	100	114	295	116	42	216	156	180	99
ENSG00000078687	5	7	4	11	4	11	6	11	33	14	25	22	12	20	15	36	6	31	10	19	23	74	5	1	8	18	10	21	0	29	3	14	13	7	9	4	6	6	5	6	10	4	18	17	14	12	7	20	12
ENSG00000078699	0	0	0	0	0	6	1	1	0	0	1	5	0	14	1	0	0	0	2	6	1	0	0	2	0	2	0	0	0	0	0	3	1	0	1	1	0	3	4	1	1	3	1	6	0	1	2	0	1
ENSG00000078725	0	0	0	0	0	0	0	0	0	0	0	0	0	0	0	0	0	0	0	0	0	0	0	0	0	0	0	0	0	0	0	0	0	0	0	0	0	0	0	0	0	0	0	0	0	0	0	0	0
ENSG00000078747	45	65	29	17	20	29	14	7	44	117	138	267	70	313	66	53	56	158	75	359	321	46	1	22	12	7	38	7	2	21	58	37	29	15	35	33	4	8	14	20	25	32	79	33	29	24	49	75	28
ENSG00000078795	0	0	0	0	0	0	0	0	0	0	0	0	0	0	0	0	0	0	0	0	0	0	0	0	0	0	0	0	0	0	0	0	0	0	0	0	0	0	0	0	0	0	0	0	0	0	0	0	0
ENSG00000078804	0	0	0	0	0	0	1	0	0	2	0	1	0	0	0	0	1	5	4	0	0	0	0	0	0	0	0	0	0	0	0	0	0	0	0	0	0	0	0	0	0	0	0	0	0	0	0	0	0
ENSG00000078808	15	1	8	2	8	15	24	2	4	5	0	11	7	13	3	0	3	1	13	6	14	0	0	0	0	0	0	0	0	0	8	3	6	0	1	6	4	0	1	2	2	4	3	6	0	3	3	8	0
ENSG00000078814	0	0	0	0	0	1	0	0	0	0	0	0	0	2	0	0	0	0	0	4	1	0	0	0	0	0	0	0	1	0	0	0	0	0	0	0	0	0	0	0	0	0	0	0	0	0	0	0	1
ENSG00000078898	0	0	0	0	0	0	0	0	0	0	0	0	0	0	0	0	0	0	0	0	0	0	0	0	0	0	0	0	0	0	0	0	0	0	0	0	0	0	0	0	0	0	0	0	0	0	0	0	0
ENSG00000078900	0	0	0	0	0	0	0	0	0	0	0	0	0	0	0	0	0	0	0	0	0	0	0	0	0	0	0	0	0	0	0	0	0	0	0	0	0	0	0	0	0	0	0	0	0	0	0	0	0
ENSG00000078902	27	17	49	26	50	94	146	100	27	117	97	99	78	166	17	61	69	129	122	150	109	282	179	172	114	312	397	298	285	191	44	23	8	19	15	13	29	16	33	14	19	28	22	37	20	23	21	41	14
ENSG00000078967	4	0	2	5	0	8	3	0	1	2	0	0	8	4	1	4	0	4	7	7	7	5	2	0	0	14	8	1	9	11	0	1	2	0	0	0	2	2	0	0	3	1	1	0	2	3	0	3	1
ENSG00000079101	0	0	0	0	0	0	0	0	0	0	0	0	0	0	0	0	0	0	0	0	1	0	0	0	0	0	0	0	0	0	0	0	0	0	0	0	0	1	0	0	0	0	0	0	0	0	0	0	0
ENSG00000079102	0	1	0	0	2	0	1	0	0	14	0	0	9	0	0	7	0	0	0	0	0	0	0	0	0	0	0	8	0	0	0	2	6	3	0	1	0	0	0	0	0	0	0	6	2	0	0	9	1
ENSG00000079112	0	0	0	0	0	0	0	0	0	0	0	0	0	0	0	0	0	0	0	0	0	0	0	0	0	0	0	0	0	0	0	0	0	0	0	0	0	0	0	0	0	0	0	0	0	0	0	0	0
ENSG00000079134	43	35	72	51	5	2	9	1	49	1	81	178	25	193	10	5	2	112	46	261	440	17	38	94	39	74	3	0	29	70	8	12	16	26	0	12	10	24	20	10	8	18	83	11	13	21	73	64	10
ENSG00000079150	1	0	0	8	0	3	3	0	22	0	2	1	0	5	0	0	0	0	0	0	3	0	0	0	0	4	0	0	0	9	0	0	0	0	0	2	0	0	0	0	0	0	2	0	0	0	2	0	0
ENSG00000079156	0	4	0	0	2	4	5	0	0	0	13	3	4	11	9	0	14	0	0	22	13	22	13	0	0	31	23	44	49	0	0	1	0	1	7	0	8	0	10	6	0	4	16	0	4	0	0	1	0
ENSG00000079215	0	3	0	0	0	0	0	0	0	0	0	0	0	0	0	0	0	0	0	0	6	0	0	0	0	0	0	0	0	0	3	0	0	0	0	0	0	0	0	0	0	0	0	0	0	0	2	0	0
ENSG00000079246	654	229	233	208	112	299	374	340	776	293	874	1915	393	2426	202	201	221	694	370	3486	2687	117	136	211	61	449	344	391	404	712	234	108	193	65	116	93	119	130	135	88	159	121	588	156	39	178	585	629	108
ENSG00000079257	46	28	20	50	31	10	15	70	162	55	96	85	103	80	20	23	33	341	68	44	47	79	115	58	40	114	69	34	21	74	15	18	7	14	1	2	7	10	24	9	5	7	70	8	7	26	54	14	49
ENSG00000079263	112	58	70	148	19	48	109	68	288	24	110	358	35	263	31	45	21	173	234	472	349	0	0	0	7	157	25	0	0	26	57	48	53	18	34	36	28	15	30	35	21	32	102	40	17	76	97	98	63
ENSG00000079277	35	27	28	12	10	22	16	13	45	111	88	133	72	146	25	55	39	42	85	177	256	24	12	77	27	35	9	66	41	53	25	13	9	19	20	10	11	11	21	4	6	20	59	25	8	17	46	44	19
ENSG00000079308	16	49	92	30	37	80	51	69	30	561	277	420	407	382	182	144	260	259	144	390	326	190	94	168	74	116	258	333	179	132	147	41	69	99	51	30	65	35	111	14	45	58	76	164	54	75	62	73	53
ENSG00000079313	0	0	0	1	1	2	4	0	3	0	0	1	0	0	0	0	0	0	1	1	0	0	0	0	0	0	0	5	0	0	0	1	2	0	0	0	0	0	1	0	0	0	1	4	0	1	0	2	0
ENSG00000079332	106	26	22	37	10	64	72	78	91	144	96	174	100	187	13	26	39	127	43	259	321	31	109	5	16	10	28	55	100	135	32	9	38	8	23	9	20	7	2	12	30	17	36	23	7	33	25	59	26
ENSG00000079335	9	7	9	18	7	12	7	2	0	2	16	28	26	104	4	0	11	59	2	96	40	6	0	16	1	1	6	7	2	3	6	6	7	1	0	3	0	10	8	8	3	6	10	10	2	5	4	9	7
ENSG00000079337	0	7	0	0	0	0	0	0	0	0	0	0	0	0	0	5	0	0	2	0	15	0	0	0	0	0	0	0	0	0	0	0	0	0	0	0	0	0	0	0	0	0	0	6	0	0	0	0	0
ENSG00000079385	2	4	2	1	0	11	5	0	0	0	0	11	0	0	0	0	1	11	0	18	14	0	0	0	0	0	0	24	0	0	2	0	0	3	0	0	0	0	0	0	0	2	2	0	0	1	3	5	0
ENSG00000079387	37	26	7	28	35	12	24	11	98	82	87	164	89	105	53	45	57	92	31	120	151	17	33	7	0	1	2	2	122	78	21	17	21	20	35	12	12	6	20	5	29	8	85	34	8	13	26	28	9
ENSG00000079393	0	0	0	0	0	0	0	0	0	0	0	0	0	0	0	0	0	0	0	0	0	0	0	0	0	0	0	0	0	0	0	0	0	0	0	0	0	0	0	0	0	0	0	0	0	0	0	0	0
ENSG00000079432	3	0	1	1	2	4	8	0	0	2	4	1	0	1	2	3	0	2	4	1	2	0	9	0	1	11	0	11	0	8	0	1	1	3	0	4	0	1	0	2	2	2	5	2	2	3	2	2	3
ENSG00000079435	0	0	0	0	0	0	0	0	0	0	0	0	0	3	8	0	0	0	0	7	0	0	0	0	0	0	0	0	0	0	0	0	0	0	0	0	0	2	0	0	0	0	3	0	0	0	0	0	0
ENSG00000079459	141	38	55	66	82	55	71	75	210	81	171	323	77	474	21	22	40	151	54	498	520	171	104	134	99	221	282	188	95	293	39	27	25	14	16	20	10	41	15	10	33	21	140	79	15	34	117	149	13
ENSG00000079462	5	0	0	0	1	9	15	0	18	0	15	9	0	27	3	1	1	17	17	16	24	0	0	0	0	9	11	0	0	10	2	5	0	0	0	4	0	12	2	3	3	1	6	1	0	5	18	4	0
ENSG00000079482	68	26	44	25	14	50	28	129	1	140	89	122	124	45	28	56	42	51	48	44	69	134	25	76	101	62	197	77	63	43	27	17	21	2	4	14	6	6	18	1	13	6	16	58	8	10	5	11	14
ENSG00000079557	0	0	0	0	0	0	0	0	0	0	0	0	0	0	0	0	0	0	0	0	0	0	0	0	0	0	0	0	0	0	0	0	0	0	0	0	0	0	0	0	0	0	0	0	0	0	0	0	0
ENSG00000079616	29	18	10	13	4	30	29	15	143	20	63	103	12	185	10	17	4	54	63	183	161	5	1	11	25	75	26	6	0	101	15	12	21	9	2	14	6	14	1	4	11	16	39	20	8	15	49	32	6
ENSG00000079689	0	0	0	0	0	0	0	0	0	0	0	0	0	0	0	0	0	0	0	0	0	0	0	0	0	0	0	0	0	0	0	0	0	0	0	0	0	0	0	0	0	0	0	0	0	0	0	0	0
ENSG00000079691	15	4	0	0	7	19	9	4	114	49	15	20	34	50	15	10	9	16	40	23	47	1	1	11	27	66	24	47	0	0	11	7	24	1	1	11	9	3	4	0	4	13	32	15	8	10	2	4	2
ENSG00000079739	12	1	33	14	2	39	50	39	62	114	109	126	35	172	42	68	65	51	105	225	177	68	0	52	58	148	220	256	206	148	20	3	6	10	1	10	39	4	46	3	9	13	31	32	8	26	32	20	31
ENSG00000079785	39	65	38	40	9	15	21	6	41	17	310	455	69	594	26	6	37	247	250	628	747	0	0	2	2	138	108	71	80	431	55	29	86	28	14	22	68	24	42	54	58	48	206	65	18	89	247	135	37
ENSG00000079805	11	14	5	5	8	13	22	9	24	0	7	12	4	44	3	0	10	5	3	29	17	22	6	32	0	7	26	3	3	21	5	5	12	2	4	6	6	3	2	8	2	12	8	4	6	3	23	30	5
ENSG00000079819	10	2	1	2	0	1	4	0	0	1	10	25	7	23	0	0	2	2	7	51	35	0	30	29	0	0	0	0	0	0	0	2	2	3	4	0	1	0	0	0	2	0	6	4	0	2	6	1	5
ENSG00000079841	0	0	0	0	0	0	0	0	0	0	0	0	0	0	0	0	0	0	0	0	0	0	0	0	0	0	0	0	0	0	0	0	0	0	0	0	0	0	0	0	0	0	0	0	0	0	0	0	0
ENSG00000079931	0	0	0	0	0	0	0	0	0	0	0	0	0	0	0	0	0	0	0	0	0	0	0	0	0	0	0	0	0	0	0	0	0	0	0	0	0	0	0	0	0	0	0	0	0	0	0	0	0
ENSG00000079950	223	216	335	145	157	176	198	176	274	973	873	869	644	1280	178	404	412	1193	726	733	1197	477	376	335	397	805	704	644	543	646	226	212	138	108	118	91	89	86	112	86	255	57	399	121	95	181	295	169	186
ENSG00000079974	2	3	0	0	0	0	2	0	0	2	6	13	5	15	3	0	3	10	4	27	29	18	20	8	1	4	1	6	3	6	1	0	4	0	1	0	0	0	0	0	1	0	5	0	2	3	4	5	0
ENSG00000079999	5	4	7	5	2	3	17	6	7	11	14	13	5	25	8	3	9	2	24	50	46	44	26	9	7	29	36	18	30	27	9	3	1	4	0	8	2	4	2	6	5	3	8	8	1	0	16	13	2
ENSG00000080007	0	0	1	0	0	3	1	0	0	0	4	6	0	0	1	1	0	0	0	12	33	0	0	0	0	0	0	0	0	0	0	0	3	0	0	0	0	0	0	0	0	1	8	2	0	4	12	1	1
ENSG00000080031	0	0	0	0	0	0	0	0	0	0	0	0	0	0	0	0	0	0	0	0	0	0	0	0	0	0	0	0	0	0	0	0	0	1	0	0	0	0	0	0	0	0	0	0	0	0	0	0	1
ENSG00000080166	0	0	0	0	1	0	0	2	0	0	0	1	0	0	0	0	0	1	0	0	0	0	0	0	0	0	0	0	2	0	0	0	1	0	0	0	0	0	0	0	0	0	0	0	0	0	3	0	0
ENSG00000080189	36	16	8	21	7	61	56	61	25	67	88	154	60	127	1	21	12	41	55	185	280	52	71	24	37	135	24	86	90	122	19	6	16	5	6	15	13	5	21	2	11	2	53	11	15	16	44	45	3
ENSG00000080200	0	0	3	1	0	0	2	1	0	0	8	9	0	3	11	0	0	1	0	9	31	0	0	0	0	0	0	0	0	0	0	0	0	0	0	0	0	0	0	3	0	1	2	3	3	1	0	1	1
ENSG00000080224	0	0	0	0	0	0	0	0	0	0	0	0	0	0	0	0	0	0	0	0	0	0	0	0	0	0	0	0	0	0	0	0	0	1	0	0	0	0	0	0	0	0	0	0	0	0	0	0	0
ENSG00000080293	0	0	0	0	0	0	0	0	0	0	0	0	0	0	0	0	0	0	0	0	0	0	0	0	0	0	0	0	0	0	0	0	0	0	0	0	0	0	0	0	0	0	0	0	0	0	0	0	0
ENSG00000080298	3	21	49	4	2	1	15	2	1	49	73	70	121	117	15	17	32	19	46	109	108	2	22	2	0	6	74	47	31	7	15	12	13	4	20	13	15	3	23	10	25	17	43	34	18	25	23	17	17
ENSG00000080345	34	53	8	54	5	4	11	5	6	8	186	164	78	170	22	20	28	51	142	621	136	0	0	16	0	73	15	58	33	7	33	25	21	5	8	16	0	7	2	32	8	21	88	32	8	20	37	79	15
ENSG00000080371	5	0	2	8	5	6	7	0	5	12	11	16	1	8	3	1	0	0	0	4	5	1	1	3	0	12	11	2	1	2	1	0	8	2	1	1	4	3	1	6	3	5	13	0	0	0	5	1	2
ENSG00000080493	1	0	1	0	0	0	0	0	0	1	0	7	0	1	0	6	2	1	6	14	1	0	0	0	0	0	0	0	1	0	0	1	2	3	0	0	0	0	0	0	2	0	1	0	0	0	1	4	1
ENSG00000080503	160	157	197	52	133	97	202	236	204	479	617	470	411	457	203	236	283	524	399	343	376	225	105	161	12	75	329	236	165	144	154	80	155	108	94	81	64	43	83	47	81	67	156	172	64	130	96	99	126
ENSG00000080511	0	0	0	0	0	0	0	0	0	0	0	0	0	0	0	0	0	0	0	0	0	0	0	0	0	0	0	0	0	0	0	0	0	0	0	0	0	0	0	0	0	0	0	0	0	0	0	0	0
ENSG00000080546	4	0	15	1	1	0	2	2	0	0	14	7	18	38	1	0	2	22	25	40	31	0	0	0	0	0	0	0	0	16	8	3	21	8	5	2	4	5	4	0	9	0	11	1	3	4	7	10	2
ENSG00000080561	0	1	0	0	0	0	0	0	0	0	0	4	0	20	0	0	1	0	9	10	11	0	0	0	0	0	0	0	0	0	0	1	0	1	0	0	0	0	0	0	0	0	1	0	0	0	0	4	3
ENSG00000080572	0	0	0	0	0	0	0	0	0	0	0	0	0	0	0	0	0	0	0	0	0	0	0	0	0	0	0	0	0	0	0	0	0	0	0	0	0	0	0	0	0	0	0	0	0	0	0	0	0
ENSG00000080573	0	0	0	0	0	2	0	0	0	0	0	0	0	0	0	0	0	0	0	0	1	0	0	0	0	0	0	0	0	0	0	0	0	0	0	1	0	0	0	0	0	0	2	0	0	2	0	0	0
ENSG00000080603	11	0	12	15	6	11	18	0	8	12	35	32	17	28	7	0	16	48	38	89	41	0	0	0	0	1	17	0	1	4	4	18	10	8	8	2	12	8	11	19	2	15	21	15	17	11	12	10	20
ENSG00000080608	56	5	22	32	13	50	27	6	7	25	84	136	34	179	13	1	11	183	56	230	87	6	5	0	0	51	0	0	46	105	13	48	61	32	9	34	30	27	19	14	17	59	109	23	7	68	64	36	28
ENSG00000080618	0	0	0	0	0	0	0	0	0	0	0	0	0	0	0	0	0	0	0	0	0	0	0	0	0	0	0	0	0	0	0	0	0	0	0	0	0	0	0	0	0	0	0	0	0	0	0	0	0
ENSG00000080644	0	0	0	0	0	0	1	0	0	0	0	0	0	0	0	0	0	0	0	0	0	0	0	0	0	0	0	0	0	0	0	0	0	0	0	0	0	0	0	0	0	0	0	0	0	0	0	0	0
ENSG00000080709	0	0	0	0	0	1	0	0	0	0	0	0	0	0	0	0	0	0	0	0	0	0	0	0	0	0	0	0	0	0	0	0	0	0	0	0	0	0	0	0	0	0	0	0	0	0	0	0	0
ENSG00000080802	28	28	26	14	6	13	20	0	13	33	57	114	40	141	6	34	14	150	33	134	93	0	0	0	0	35	4	1	17	13	6	14	22	4	14	8	7	5	7	7	10	4	39	14	4	24	35	34	23
ENSG00000080815	15	6	15	3	1	3	13	1	0	17	41	225	34	136	6	7	17	20	5	392	306	0	0	0	13	57	44	26	2	106	2	4	0	2	0	1	13	5	1	8	6	4	36	4	2	5	27	59	7
ENSG00000080819	1	0	0	0	0	0	3	1	0	0	0	4	0	13	4	0	4	18	7	0	4	0	0	0	0	5	0	3	0	16	7	3	4	0	1	2	2	0	0	0	0	0	0	0	0	1	1	1	0
ENSG00000080822	47	14	29	36	19	36	48	65	106	43	93	112	36	122	10	13	20	53	48	172	115	81	70	52	25	29	55	31	23	52	15	8	18	12	1	7	6	11	5	3	20	10	31	9	10	10	30	36	11
ENSG00000080823	1	0	0	0	0	0	1	0	0	0	0	0	0	0	0	0	0	0	1	0	0	0	0	0	0	16	0	0	0	3	0	0	0	0	0	1	0	1	0	2	0	0	2	0	0	0	0	4	0
ENSG00000080824	769	193	307	291	237	612	616	453	877	497	729	904	488	1067	201	203	202	735	554	1334	1052	476	396	415	151	574	990	1103	606	1012	207	208	286	125	177	193	253	156	291	220	182	261	506	244	155	293	419	357	199
ENSG00000080839	7	6	5	20	2	8	2	6	4	6	7	7	33	82	3	1	4	55	11	105	29	5	0	0	0	3	0	0	0	15	6	2	15	5	10	1	0	3	1	0	9	4	16	5	0	8	9	14	2
ENSG00000080845	18	10	9	0	1	19	8	20	13	24	14	27	25	48	4	1	6	11	26	58	43	4	17	0	9	12	13	14	1	11	11	6	1	1	6	0	6	1	3	0	8	3	19	4	5	7	16	9	4
ENSG00000080854	1	5	0	0	0	7	0	0	0	13	1	4	0	6	2	0	1	3	0	5	5	1	0	0	4	0	0	0	0	0	0	1	6	0	0	1	0	0	2	0	0	3	0	0	0	5	0	0	0
ENSG00000080910	0	0	0	0	0	0	0	0	0	0	0	0	0	0	0	0	0	0	0	0	0	0	0	0	0	0	0	0	0	0	0	0	0	0	0	0	0	0	0	0	0	0	0	0	0	0	0	0	0
ENSG00000080947	0	0	0	0	0	1	0	0	0	0	0	0	0	0	0	0	0	0	0	0	0	0	0	0	0	0	0	0	0	0	0	0	0	1	0	0	1	0	0	0	0	0	0	0	0	0	2	5	0
ENSG00000080986	8	0	0	0	9	20	1	0	42	0	17	54	0	44	4	0	16	3	0	44	14	0	0	2	0	0	0	0	0	0	0	11	0	1	2	0	8	12	1	0	1	0	2	1	0	3	16	5	4
ENSG00000081014	11	6	7	0	2	0	14	1	1	1	8	38	10	28	5	11	5	0	1	39	5	4	0	0	0	0	25	0	0	0	2	4	3	2	3	1	2	2	1	1	2	4	9	3	1	4	14	25	2
ENSG00000081019	23	14	14	2	3	14	20	5	18	19	22	68	6	86	1	4	8	29	16	89	62	3	0	0	3	6	19	10	1	7	16	5	12	2	3	9	3	3	9	3	1	5	16	17	2	4	17	4	5
ENSG00000081026	6	0	0	0	1	0	0	0	0	0	0	7	1	16	0	0	0	0	0	7	0	0	0	0	0	0	0	0	0	1	0	0	0	0	1	0	1	0	0	0	0	0	7	0	0	0	0	0	0
ENSG00000081041	0	0	0	0	0	0	0	1	0	0	0	0	0	0	2	0	0	1	0	0	0	1	0	0	0	5	0	0	0	0	0	0	0	0	0	0	0	0	1	0	0	0	0	0	0	1	0	0	0
ENSG00000081051	0	0	0	0	0	0	0	0	0	0	0	0	0	0	0	0	0	0	0	0	0	0	0	0	0	0	0	0	0	0	0	0	0	0	0	0	0	0	0	0	0	0	0	0	0	0	0	0	0
ENSG00000081052	2	10	0	0	0	0	0	0	0	0	0	0	0	2	0	0	1	0	4	0	0	0	0	0	0	0	0	0	0	0	0	0	0	1	0	0	5	0	0	0	0	0	0	1	0	5	9	0	0
ENSG00000081059	7	3	3	21	3	21	7	0	3	23	117	122	11	210	33	2	1	161	73	231	181	0	13	13	0	2	4	13	0	72	12	14	41	12	0	16	11	8	24	6	5	20	66	19	17	38	45	60	4
ENSG00000081087	19	10	0	8	0	8	14	7	1	56	50	53	92	152	7	29	39	14	33	201	117	11	11	7	14	30	33	46	14	51	9	0	4	4	1	5	8	3	19	3	12	3	35	33	13	18	16	31	3
ENSG00000081138	0	0	0	0	0	0	0	0	0	0	0	0	0	0	0	0	0	0	0	0	0	0	0	0	0	0	0	0	0	0	0	0	0	0	0	0	0	0	0	0	0	0	0	0	0	0	0	0	0
ENSG00000081148	0	0	0	0	0	0	0	1	1	0	0	0	0	0	3	0	0	0	0	0	0	0	0	0	0	0	0	0	0	0	0	0	0	0	0	0	2	0	0	0	0	2	0	0	0	0	1	0	0
ENSG00000081154	504	363	512	683	370	520	603	1325	532	1821	1562	1746	1508	1307	400	800	1203	1471	1343	1436	1286	1919	1402	1636	1272	2033	2493	1604	1539	1729	403	389	354	263	263	243	414	172	319	146	683	243	618	590	234	399	324	377	372
ENSG00000081177	0	0	0	0	0	0	2	0	0	0	8	22	0	16	0	0	5	15	1	27	54	0	0	0	0	0	0	6	0	0	0	2	0	1	1	1	1	0	1	3	0	0	5	1	0	0	4	9	0
ENSG00000081181	40	26	101	33	83	50	88	195	40	130	219	54	91	124	33	81	45	146	85	28	132	95	190	63	25	172	364	80	154	131	62	22	21	10	1	5	7	3	13	20	20	11	34	10	21	12	30	22	9
ENSG00000081189	281	174	303	355	157	269	368	490	181	693	645	666	496	417	188	286	302	484	404	725	594	380	286	351	276	270	445	765	417	559	155	151	114	126	113	115	119	57	140	99	145	118	295	241	77	145	190	129	185
ENSG00000081237	1804	1145	536	578	261	735	758	418	1185	218	3155	9256	636	10388	315	204	260	2532	1361	16887	14768	116	53	209	144	1531	457	784	496	2465	1185	367	829	304	311	391	307	364	236	331	264	421	2241	481	158	657	2347	2633	570
ENSG00000081248	0	0	0	0	0	0	0	0	0	0	0	0	0	0	0	0	0	0	0	0	0	0	0	0	0	0	0	0	0	0	0	0	0	0	0	0	0	0	1	6	0	0	0	0	0	0	0	1	0
ENSG00000081277	0	0	0	0	0	0	0	0	0	0	0	0	0	0	0	0	0	0	0	0	0	0	0	0	0	0	0	0	0	0	0	0	0	0	0	0	0	0	0	0	0	0	0	0	0	0	0	0	0
ENSG00000081307	37	3	0	17	2	20	9	22	2	0	45	62	0	78	4	1	13	12	6	52	59	0	0	0	0	0	0	33	0	16	20	12	24	0	3	7	15	13	5	10	8	5	9	9	4	20	23	25	1
ENSG00000081320	179	37	40	74	23	102	125	28	36	3	77	56	9	85	3	2	7	60	35	136	91	18	0	0	0	2	25	16	10	20	36	20	41	7	3	7	18	8	11	17	5	17	55	9	11	21	40	33	25
ENSG00000081377	31	54	105	33	130	63	72	141	57	219	257	256	194	344	118	218	160	159	219	168	269	99	119	96	39	20	166	147	146	109	63	33	52	42	17	35	49	15	33	5	58	35	91	83	50	32	23	39	52
ENSG00000081386	0	0	0	0	0	1	0	0	0	3	2	16	3	11	0	0	0	9	2	14	12	0	0	0	0	1	0	0	0	1	0	0	2	1	0	3	0	2	6	0	3	2	1	0	0	0	9	1	1
ENSG00000081479	0	0	0	0	0	0	0	0	0	0	0	0	0	0	0	0	0	0	0	0	0	0	0	0	0	0	0	0	0	0	0	1	0	0	0	0	0	0	0	0	0	0	0	0	0	0	0	0	0
ENSG00000081665	4	8	2	4	3	4	3	16	1	13	3	21	5	15	1	5	9	14	9	17	25	0	21	1	13	2	0	2	0	1	2	1	7	1	2	2	2	5	3	2	3	4	3	11	2	3	3	8	6
ENSG00000081692	0	0	0	0	0	0	0	0	0	0	0	0	0	0	0	0	0	0	0	0	0	0	0	0	0	0	0	0	0	0	0	0	0	0	0	0	0	0	0	0	0	0	0	0	0	0	0	0	0
ENSG00000081721	98	6	23	14	6	30	19	0	8	17	35	92	30	71	1	0	0	46	12	123	91	0	1	0	0	26	0	0	13	30	13	3	7	5	3	5	7	7	15	3	7	8	29	8	3	7	52	32	2
ENSG00000081760	1	0	0	1	2	0	9	0	5	7	5	20	0	18	0	1	0	1	0	55	17	11	0	0	0	0	0	0	0	0	0	1	1	2	0	0	0	0	1	0	4	0	1	0	0	0	0	5	0
ENSG00000081791	34	16	0	5	4	27	34	30	23	7	28	114	27	142	1	7	7	43	24	223	269	18	77	0	0	66	0	24	6	45	12	9	7	7	13	8	9	9	4	5	5	5	54	6	0	6	34	40	3
ENSG00000081800	0	0	0	0	0	0	0	0	0	0	0	0	0	0	0	0	0	0	0	0	0	0	0	0	0	0	0	0	0	0	0	0	0	0	0	0	0	0	0	0	0	0	0	0	0	0	0	0	0
ENSG00000081803	0	1	0	0	0	0	0	0	0	0	0	0	4	0	0	0	0	0	0	0	0	0	0	0	0	0	0	0	0	0	0	0	0	0	0	0	0	0	0	0	0	0	0	0	0	0	0	0	0
ENSG00000081818	0	0	0	0	0	0	0	0	0	0	0	0	0	0	0	0	0	0	0	0	0	0	0	0	0	0	0	0	0	0	0	0	0	0	0	0	0	0	0	0	0	0	0	0	0	0	0	0	0
ENSG00000081842	0	0	0	0	0	0	0	0	0	0	0	0	0	0	0	0	0	0	0	0	0	0	0	0	0	0	0	0	0	0	0	0	0	0	0	0	0	0	0	0	0	0	0	0	0	0	0	0	0
ENSG00000081853	0	0	0	0	0	0	0	0	0	0	0	0	0	0	0	0	0	0	0	0	0	0	0	0	0	0	0	0	0	0	0	0	0	0	0	0	0	0	0	0	0	0	0	0	0	0	0	0	0
ENSG00000081870	108	70	44	83	52	48	78	191	218	148	109	235	118	156	27	60	41	246	169	111	180	74	101	78	34	143	269	86	91	157	67	28	39	36	34	31	30	24	32	15	24	27	96	46	17	38	84	71	25
ENSG00000081913	0	0	0	0	0	3	0	0	0	0	0	3	12	1	0	2	0	0	0	0	0	0	0	0	0	0	0	0	0	0	0	0	0	3	0	2	0	5	0	0	0	0	0	0	0	0	0	0	1
ENSG00000081923	0	0	1	0	0	0	0	0	0	0	0	0	0	0	1	1	0	0	0	0	0	0	0	0	0	0	0	0	0	0	0	0	0	0	0	0	0	1	0	0	0	4	0	0	0	1	0	2	0
ENSG00000081985	7	0	0	0	0	0	0	2	1	0	0	9	0	0	0	0	1	9	0	0	8	0	0	0	11	0	0	0	0	0	0	0	0	0	0	0	0	0	4	3	0	3	0	0	0	2	6	4	0
ENSG00000082014	10	0	5	3	3	4	7	0	1	0	3	6	0	1	2	3	3	13	8	12	8	0	0	0	0	0	0	0	0	0	1	2	0	2	0	6	7	1	1	3	7	5	8	0	3	3	8	8	1
ENSG00000082068	77	6	12	57	24	17	30	6	20	4	40	133	26	123	32	0	27	148	68	247	72	0	0	3	0	17	45	9	2	31	17	18	45	42	26	30	36	15	16	46	10	40	73	25	8	32	66	49	34
ENSG00000082074	1805	1328	1814	1064	724	1732	1997	2770	1169	7694	5592	5180	4984	5960	1586	3342	2592	3915	4103	4895	6243	3045	2245	1986	1971	3188	6028	5210	4590	2925	1824	969	1125	1056	895	836	1453	696	1449	688	1104	1060	2132	2153	1039	1411	1081	1303	1045
ENSG00000082126	0	0	0	0	0	0	0	0	0	0	0	0	0	0	0	0	0	0	0	0	0	0	0	0	0	0	0	0	1	0	0	1	0	0	0	0	0	0	0	0	0	0	0	0	0	0	0	0	0
ENSG00000082146	14	15	18	15	6	59	39	30	2	31	112	8	82	118	23	25	38	61	94	81	141	32	16	28	0	60	62	61	45	39	5	4	24	8	6	4	0	5	20	17	15	15	22	30	2	28	28	61	23
ENSG00000082153	245	173	149	95	76	202	154	171	173	521	511	1021	338	988	66	114	160	411	314	1184	1523	194	89	138	54	195	450	375	255	359	174	53	76	24	20	44	43	29	68	18	72	41	227	77	26	64	259	257	58
ENSG00000082175	0	0	0	0	0	0	0	0	0	0	0	0	0	0	0	0	0	0	0	0	0	0	0	0	0	0	0	0	0	0	0	0	0	1	0	0	0	0	0	1	0	0	0	0	0	0	0	0	0
ENSG00000082196	0	0	0	0	0	0	0	0	0	0	0	0	0	0	0	0	0	0	0	0	0	0	0	0	0	0	0	0	0	0	0	0	0	0	0	0	0	0	0	0	0	0	0	0	0	0	0	0	0
ENSG00000082212	28	15	9	1	14	31	17	4	4	59	99	131	36	79	29	16	1	21	25	167	105	0	59	41	0	124	102	43	11	70	27	3	6	12	14	7	21	8	19	8	11	9	58	18	16	14	55	72	9
ENSG00000082213	1	6	1	5	0	3	2	0	0	22	18	81	31	71	7	1	22	25	40	108	67	3	2	0	0	3	0	7	1	7	7	2	5	0	0	1	7	0	8	0	3	3	16	4	0	2	19	18	3
ENSG00000082258	45	20	16	12	0	9	25	0	0	0	39	60	3	53	1	0	6	63	8	74	116	0	0	0	2	0	0	0	0	16	5	8	5	0	2	9	4	2	2	1	16	6	41	3	2	4	19	21	11
ENSG00000082269	7	1	0	3	3	1	0	0	33	0	0	7	7	5	11	0	1	0	0	58	47	0	0	0	0	0	0	0	0	38	0	4	2	4	1	0	0	2	1	4	0	0	21	3	0	3	9	2	4
ENSG00000082293	32	9	12	158	21	16	24	0	2	0	48	60	1	72	0	1	0	36	15	76	25	0	0	0	0	17	3	39	0	68	13	3	4	2	10	2	2	0	1	0	0	8	17	2	10	5	15	4	12
ENSG00000082397	45	67	136	5	3	38	39	6	6	69	208	52	49	14	62	62	61	120	143	222	104	1	23	54	13	14	56	83	49	17	29	6	26	19	9	12	6	14	1	9	63	33	53	65	5	33	15	41	24
ENSG00000082438	15	6	0	9	3	0	6	0	0	0	2	30	3	9	1	0	7	7	8	64	34	0	0	0	0	4	0	21	0	0	0	8	3	1	0	4	0	0	1	0	3	6	5	0	2	4	14	2	10
ENSG00000082458	0	0	0	8	0	0	0	0	0	4	3	8	0	3	0	0	0	2	0	10	7	0	0	0	0	0	0	0	0	0	0	1	1	0	0	0	0	0	1	0	0	0	0	3	0	0	0	1	2
ENSG00000082482	0	0	0	0	0	0	0	0	0	0	0	0	0	0	0	0	0	0	0	0	0	0	0	0	0	0	0	0	0	0	0	0	0	0	0	0	0	0	0	0	0	0	0	0	0	0	0	0	0
ENSG00000082497	0	0	0	0	0	0	0	0	0	0	0	0	0	0	0	0	0	0	0	0	0	0	0	0	0	0	0	0	0	0	0	0	0	0	0	0	0	0	0	0	0	0	0	0	0	0	0	0	0
ENSG00000082512	12	8	7	28	1	12	12	7	41	0	51	54	0	86	2	3	12	42	6	120	84	0	16	2	0	123	0	0	31	68	1	8	2	0	5	7	4	2	6	8	5	12	36	10	7	10	22	39	6
ENSG00000082515	92	6	17	72	21	20	38	67	306	1	69	78	18	113	4	6	5	87	28	156	170	66	0	11	12	59	47	56	0	51	17	24	33	13	10	8	16	15	10	7	5	7	67	15	5	20	68	54	6
ENSG00000082516	8	1	0	2	2	0	10	0	37	0	21	57	0	74	0	4	7	12	46	141	76	0	7	1	0	0	0	1	0	22	5	6	9	0	0	11	0	1	3	2	2	17	29	9	0	0	10	25	3
ENSG00000082556	0	0	0	0	0	0	0	0	0	0	0	0	0	0	0	0	0	0	0	0	0	0	0	0	0	0	0	0	0	0	0	0	0	0	0	0	0	0	0	0	0	0	0	0	0	0	0	1	0
ENSG00000082641	1	2	0	0	4	1	5	0	0	0	3	5	0	5	3	2	1	2	1	30	7	0	0	0	0	24	7	0	0	0	0	2	1	0	4	4	1	0	1	3	3	3	2	2	0	11	0	6	4
ENSG00000082684	0	0	0	0	0	0	0	0	0	0	0	0	0	0	0	0	0	0	0	0	0	0	0	0	0	0	0	0	0	0	0	0	0	0	0	1	0	0	0	0	0	0	1	0	0	0	0	0	0
ENSG00000082701	41	26	30	18	21	53	17	50	4	93	46	80	25	41	9	53	77	126	44	44	41	71	41	23	2	52	60	27	99	61	12	19	37	17	14	17	11	18	15	14	26	17	32	21	19	17	29	17	26
ENSG00000082781	50	115	88	94	172	277	284	551	153	875	501	403	769	694	246	468	597	421	549	272	458	504	333	151	171	329	761	558	549	685	160	126	115	180	83	55	145	68	275	65	122	112	189	304	110	154	29	113	84
ENSG00000082805	37	25	9	52	10	12	19	16	32	15	34	56	32	40	15	10	10	65	66	47	38	5	1	0	4	10	1	7	0	8	13	27	19	17	26	32	21	12	8	10	18	29	32	8	8	22	36	20	36
ENSG00000082898	62	88	94	59	59	51	46	41	90	137	271	401	167	395	109	66	81	261	178	473	501	20	14	4	3	33	71	13	12	34	28	70	91	34	36	29	23	22	33	14	41	38	127	41	11	40	106	103	44
ENSG00000082929	0	0	0	0	0	0	0	0	0	0	0	0	0	0	0	0	0	0	0	0	0	0	0	0	0	0	0	0	0	0	0	0	0	0	0	0	0	0	0	0	0	0	0	0	0	0	0	0	0
ENSG00000082996	383	102	21	192	105	241	189	164	198	214	171	377	112	395	46	131	33	316	228	589	680	150	125	158	22	298	303	208	291	384	118	35	45	18	27	36	9	27	25	27	59	24	128	25	27	36	160	125	96
ENSG00000083067	0	1	0	0	4	0	0	0	0	5	1	1	0	1	0	0	1	0	0	0	2	0	4	0	0	0	0	0	0	0	0	0	0	0	0	0	0	0	0	0	0	0	1	0	0	0	0	0	1
ENSG00000083093	15	3	2	1	2	2	3	1	17	0	15	11	1	36	4	0	1	26	24	42	35	0	0	0	4	15	2	1	0	9	2	3	5	0	0	3	4	1	9	3	1	6	6	2	1	5	8	5	2
ENSG00000083097	17	4	16	28	0	7	3	0	24	17	37	98	31	64	7	3	0	27	0	86	83	0	0	0	0	0	0	0	0	19	15	6	4	0	0	1	0	10	1	4	16	1	15	3	5	8	23	35	5
ENSG00000083099	77	5	0	19	4	35	23	19	51	2	20	44	7	40	0	1	5	10	15	47	43	2	21	4	0	30	7	20	11	19	9	1	33	3	2	9	9	1	5	7	8	2	26	9	1	12	34	17	3
ENSG00000083123	26	4	0	14	0	11	14	0	26	0	2	18	0	22	0	0	8	53	4	59	28	0	0	0	0	92	0	53	0	19	1	0	0	4	0	0	0	0	0	0	2	1	5	6	2	0	15	6	2
ENSG00000083168	111	34	53	69	38	101	103	58	68	109	159	175	162	257	44	53	43	127	63	198	193	19	49	46	11	99	152	114	45	69	35	38	48	26	10	31	45	35	29	16	42	32	80	69	26	36	47	77	39
ENSG00000083223	84	61	128	60	17	21	46	59	25	157	123	379	68	368	24	126	98	196	135	665	570	32	111	1	12	15	32	75	33	56	49	53	59	29	50	27	35	14	44	48	15	38	103	42	22	64	91	119	110
ENSG00000083290	11	9	2	0	6	2	6	0	0	8	2	1	12	12	3	9	4	11	9	15	64	0	0	0	0	0	0	0	0	13	7	7	5	0	1	2	1	7	2	0	0	6	9	10	1	8	14	3	7
ENSG00000083307	0	0	0	0	0	0	0	0	0	0	0	0	0	0	0	0	0	0	0	0	0	0	0	0	0	0	0	0	0	0	0	0	0	0	0	0	0	0	0	0	0	0	0	0	0	0	0	0	0
ENSG00000083312	66	84	90	9	9	51	57	78	22	278	506	426	193	217	78	149	171	204	136	396	298	225	126	8	206	268	230	354	234	122	49	76	43	34	53	41	52	22	116	57	57	80	120	163	35	63	119	51	89
ENSG00000083444	9	40	39	7	2	13	21	2	3	33	17	91	57	49	8	16	1	1	11	176	108	6	18	0	1	30	75	46	17	41	31	1	11	3	18	3	2	0	0	1	0	8	43	2	4	16	33	26	9
ENSG00000083454	1	0	0	2	0	1	1	0	0	0	0	2	0	0	0	1	0	0	0	2	1	0	0	0	0	0	0	0	0	0	1	0	0	0	0	0	0	0	1	2	1	0	0	0	0	0	1	0	0
ENSG00000083457	173	19	86	89	63	159	176	93	224	184	276	181	152	75	8	13	66	125	146	146	169	167	248	253	130	159	56	76	51	176	37	46	30	33	26	28	46	31	51	26	94	14	72	18	32	26	63	58	8
ENSG00000083520	22	32	8	41	1	13	9	0	62	5	49	153	24	126	10	24	18	18	4	206	181	27	0	0	14	1	1	40	0	9	27	19	17	3	1	4	12	4	5	9	7	10	30	30	5	5	30	25	22
ENSG00000083535	192	24	5	116	20	37	48	28	67	5	78	179	50	162	14	16	17	190	96	209	151	0	60	32	0	62	0	87	10	100	26	29	34	12	9	11	13	7	8	12	4	18	91	21	9	44	67	40	17
ENSG00000083544	29	31	19	23	9	27	6	20	0	39	64	72	37	80	9	31	32	64	73	77	101	23	2	2	2	44	37	20	8	0	8	7	13	11	14	6	27	11	7	5	10	42	23	19	4	8	23	37	16
ENSG00000083622	0	0	0	0	0	0	0	0	0	0	0	0	0	0	0	0	0	0	0	0	0	0	0	0	0	0	0	0	0	0	0	0	0	0	0	0	0	0	0	0	0	0	0	0	0	0	0	0	0
ENSG00000083635	8	0	0	7	0	7	2	0	0	0	13	34	16	14	0	2	0	0	1	26	29	0	0	0	0	0	0	1	0	44	1	0	4	0	0	2	0	1	1	1	0	0	1	0	1	2	8	6	0
ENSG00000083642	79	72	111	83	31	64	46	90	74	189	477	417	236	449	136	99	204	262	74	514	711	7	24	0	0	77	53	117	61	44	144	68	50	66	46	20	33	28	52	17	77	42	117	78	32	32	124	121	69
ENSG00000083720	5	9	75	9	6	3	22	0	137	0	54	177	19	194	0	1	4	2	11	300	114	0	0	0	0	19	0	27	1	6	12	10	30	0	4	2	4	8	1	0	8	20	35	11	2	10	15	40	4
ENSG00000083750	4	16	15	5	0	7	6	0	4	0	27	47	14	65	8	4	4	67	0	81	100	0	12	0	0	51	0	0	1	11	10	8	2	1	10	1	2	0	0	2	4	3	4	6	0	4	11	8	3
ENSG00000083782	0	0	0	0	0	0	0	0	0	0	0	0	0	0	0	0	0	0	0	0	0	0	0	0	0	0	0	0	0	0	0	0	0	0	0	0	0	0	0	0	0	0	0	0	0	0	0	0	0
ENSG00000083799	98	73	24	52	40	65	62	4	24	108	233	523	131	711	55	16	21	196	142	942	570	0	0	0	1	96	61	57	91	61	82	40	94	20	21	34	27	49	52	37	15	28	139	26	13	62	108	130	37
ENSG00000083807	0	0	0	0	0	0	3	0	18	0	5	1	6	2	0	1	1	11	0	8	3	0	0	0	0	0	0	0	0	0	1	1	0	1	2	1	0	0	1	1	0	0	4	3	0	3	1	5	1
ENSG00000083812	0	0	0	0	0	0	0	0	0	0	2	7	0	6	0	0	0	5	5	2	16	0	0	0	0	0	4	0	0	8	2	0	1	0	0	0	0	0	0	2	0	0	1	0	0	0	3	2	2
ENSG00000083814	0	4	0	0	0	0	3	0	0	3	10	18	0	46	0	0	0	14	1	30	40	0	0	7	0	4	0	0	0	12	0	0	0	0	0	1	2	0	0	0	3	1	4	0	0	3	8	16	2
ENSG00000083817	0	0	0	0	0	0	0	0	0	0	0	0	0	3	0	0	0	0	0	2	6	0	0	0	0	0	0	0	0	3	0	0	0	0	0	0	0	0	0	0	0	0	0	0	0	0	0	0	0
ENSG00000083828	2	4	4	1	0	10	8	32	4	15	10	12	11	15	1	3	8	4	5	21	12	4	0	15	18	7	3	16	1	7	4	5	3	3	0	1	2	2	2	0	3	2	5	1	5	2	8	6	3
ENSG00000083838	1	0	0	0	0	0	2	0	0	0	0	1	0	1	0	0	0	0	0	13	1	0	0	0	0	0	0	0	0	3	0	0	0	0	0	0	0	0	0	0	0	0	1	0	0	0	0	2	0
ENSG00000083842	0	0	0	0	0	0	0	0	0	0	0	0	0	0	0	0	0	0	0	0	0	0	0	0	0	0	0	0	0	0	0	0	0	0	0	0	0	0	0	0	0	0	0	0	0	0	0	0	0
ENSG00000083844	0	0	0	0	0	0	0	1	0	1	0	2	0	2	0	0	2	4	2	6	0	0	0	0	0	0	0	0	0	3	2	0	2	2	0	0	0	0	0	1	0	0	0	0	1	0	2	2	1
ENSG00000083845	685	256	170	404	280	592	708	517	978	187	1081	1586	284	2505	117	113	141	1385	822	1635	2418	314	94	209	261	1042	517	587	311	1664	279	183	382	151	140	176	210	142	177	100	156	213	914	219	124	316	840	559	97
ENSG00000083857	0	0	0	0	0	0	0	0	0	0	0	0	0	0	0	0	1	1	0	0	0	0	0	0	0	0	0	0	0	0	0	0	0	0	0	0	0	0	0	0	0	0	0	0	0	0	0	0	0
ENSG00000083896	64	13	11	37	19	30	26	2	37	18	70	101	27	183	22	7	14	87	47	161	45	4	0	2	1	13	9	14	4	24	15	16	28	12	10	28	17	8	26	16	11	26	57	21	14	20	43	54	15
ENSG00000083937	243	27	9	53	49	30	84	122	169	41	92	97	78	93	27	20	40	72	27	212	160	155	36	55	44	43	119	134	116	111	33	16	17	3	11	14	9	5	28	24	17	19	41	23	17	19	46	33	8
ENSG00000084070	123	54	31	65	24	74	55	9	17	22	57	159	16	170	17	12	21	69	47	422	172	27	2	18	14	77	2	2	26	102	13	23	31	12	15	35	53	12	14	38	27	30	53	28	16	34	85	72	72
ENSG00000084072	211	73	87	76	159	287	354	165	297	437	279	503	344	438	107	199	184	240	233	358	548	334	329	382	240	193	660	733	345	720	60	48	85	86	46	30	99	77	77	20	75	49	148	116	58	35	99	158	60
ENSG00000084073	32	40	51	1	1	17	16	1	83	96	131	162	46	193	30	71	75	121	79	277	375	10	24	49	8	19	20	44	40	94	33	19	7	8	1	1	18	7	18	3	25	11	61	28	13	12	29	42	8
ENSG00000084090	9	29	8	19	1	0	5	0	1	39	45	78	27	74	9	23	10	11	3	113	101	25	0	0	1	1	3	19	1	26	20	4	12	2	3	2	0	2	6	0	1	1	34	16	0	9	24	17	7
ENSG00000084092	1	1	0	5	8	13	4	9	13	0	14	12	6	38	0	0	0	4	7	14	20	0	1	0	9	4	0	4	2	30	1	1	1	0	3	1	0	4	0	1	0	0	5	0	6	6	7	10	0
ENSG00000084093	36	2	10	14	4	27	17	24	13	27	15	39	12	74	8	8	7	44	23	59	39	29	37	0	0	8	11	38	39	75	5	6	11	2	16	3	3	3	9	3	0	4	13	9	4	7	21	13	4
ENSG00000084110	3	7	2	0	0	15	2	0	15	2	8	37	0	1	1	0	7	1	0	97	44	0	0	0	0	19	0	0	0	0	6	0	1	0	0	0	0	0	0	0	1	1	17	1	0	0	10	22	5
ENSG00000084112	4	9	5	4	2	12	16	22	7	16	9	12	32	27	1	11	8	2	23	4	27	59	1	3	4	22	35	9	4	6	2	3	3	4	1	3	7	2	7	1	6	1	3	9	11	2	0	5	8
ENSG00000084207	741	165	119	159	344	503	678	249	304	92	215	827	102	563	48	78	107	285	211	824	1429	24	201	176	81	419	363	242	200	433	133	83	78	72	50	74	100	56	77	68	64	76	460	105	84	122	412	487	64
ENSG00000084234	444	184	75	130	57	366	319	43	177	65	139	497	42	334	21	51	27	116	65	1155	936	15	22	55	0	95	63	78	58	202	94	15	35	15	9	34	33	5	26	46	41	23	201	19	14	32	246	241	57
ENSG00000084444	0	0	10	0	0	0	1	0	0	0	5	0	0	7	7	0	0	0	8	2	34	0	0	0	0	0	0	0	0	0	0	1	0	1	0	0	0	0	0	0	0	0	13	0	0	4	6	2	0
ENSG00000084453	0	0	0	0	0	0	0	0	0	0	0	0	0	0	0	0	0	0	0	0	0	0	0	0	0	0	0	0	0	0	0	0	0	0	0	0	0	0	0	0	0	0	0	0	0	0	0	0	0
ENSG00000084463	284	77	42	98	107	161	197	89	186	145	247	402	104	388	50	81	111	249	123	433	492	244	50	134	54	263	271	214	106	83	68	54	61	48	45	33	42	19	42	27	33	22	164	61	36	47	135	107	37
ENSG00000084623	561	90	85	152	122	380	494	164	541	132	292	729	78	778	56	45	47	305	222	926	1113	98	214	189	131	362	230	358	29	907	84	31	85	44	12	24	38	21	43	26	72	30	205	55	25	74	261	237	34
ENSG00000084628	0	0	0	0	0	0	0	0	0	0	0	0	0	0	0	0	0	0	0	0	0	0	0	0	0	0	0	0	0	0	0	0	0	0	0	0	0	0	0	0	0	0	0	0	0	0	0	1	0
ENSG00000084636	0	0	0	0	0	0	0	0	0	0	0	0	0	0	0	0	0	0	0	0	0	0	0	0	0	0	0	0	0	0	0	0	0	0	0	0	0	0	0	0	0	0	0	0	0	0	0	0	0
ENSG00000084652	9	1	3	1	0	2	3	0	6	5	23	28	0	36	1	8	1	3	0	49	43	0	0	0	0	0	6	15	5	2	0	0	0	2	3	1	0	1	0	1	1	2	3	0	1	3	8	4	4
ENSG00000084674	0	0	0	0	0	0	0	0	0	0	0	0	0	0	0	0	0	0	0	0	0	0	0	0	0	0	0	0	0	0	0	0	0	0	0	0	0	0	0	0	0	0	0	0	0	0	0	0	0
ENSG00000084676	68	89	68	52	28	93	106	21	96	333	213	244	189	224	145	129	116	355	206	285	297	119	41	69	25	43	101	42	53	176	36	54	54	41	22	33	52	44	54	25	19	27	71	66	39	30	44	66	61
ENSG00000084693	8	21	36	12	24	37	65	80	19	146	115	157	86	118	75	97	136	94	100	135	96	159	202	155	102	176	177	158	284	120	30	18	37	22	33	5	50	7	55	18	25	21	42	50	22	25	18	27	33
ENSG00000084710	0	0	0	0	0	0	0	0	0	0	0	0	0	0	0	0	0	0	0	0	0	0	0	0	0	0	0	0	0	0	0	0	0	0	0	0	0	0	0	0	0	0	0	0	0	0	0	0	0
ENSG00000084731	3	14	13	0	1	14	11	33	16	49	18	25	20	36	22	36	35	20	72	8	17	8	1	32	21	10	22	40	60	15	4	0	6	0	6	1	6	1	10	7	1	7	9	18	3	8	1	6	6
ENSG00000084733	187	147	173	170	228	237	237	486	141	858	477	534	647	646	272	405	409	375	512	621	794	427	196	352	109	588	736	458	569	365	219	72	144	122	166	75	131	87	115	50	170	87	198	279	123	130	141	132	129
ENSG00000084734	0	1	0	0	0	0	3	0	0	3	0	0	0	18	3	12	11	0	0	0	2	0	0	0	1	0	36	0	0	0	0	0	0	0	0	1	0	1	0	0	0	0	0	0	0	0	0	0	0
ENSG00000084754	260	109	94	72	29	264	162	77	123	214	462	1342	243	1385	130	96	173	690	318	2471	2110	220	97	208	105	476	202	316	225	684	235	33	98	43	45	26	47	36	41	33	101	41	384	67	23	105	403	341	39
ENSG00000084764	0	0	0	0	0	4	0	0	0	0	0	0	0	0	0	0	0	0	0	0	0	0	0	0	1	0	0	0	0	0	1	0	0	0	0	0	0	0	0	0	1	0	0	0	0	0	0	0	0
ENSG00000084774	7	3	2	0	1	1	9	2	0	2	31	100	0	138	17	9	9	12	6	38	67	0	0	0	0	0	0	0	0	12	1	5	25	0	8	1	14	0	4	4	9	12	21	2	4	8	9	11	0
ENSG00000085063	17	9	9	7	25	10	28	27	67	9	29	6	24	61	0	4	6	31	39	16	43	0	23	9	4	23	22	31	3	36	3	12	18	9	7	1	1	6	5	8	6	3	15	5	3	5	18	12	6
ENSG00000085117	230	222	241	274	272	788	1255	843	275	427	602	783	553	647	147	275	417	304	455	548	709	1327	516	930	583	627	1597	1828	1151	2044	181	97	52	67	88	66	103	63	222	27	121	73	185	209	111	75	102	88	51
ENSG00000085185	5	2	0	3	0	2	0	6	0	3	8	10	5	10	5	1	11	0	14	11	11	6	2	3	0	2	3	2	1	0	9	1	1	1	1	1	4	0	0	5	0	3	0	0	1	7	2	6	0
ENSG00000085224	357	174	248	328	169	157	170	271	415	314	522	624	388	796	85	178	234	539	629	871	740	408	358	122	113	339	470	352	278	322	237	143	147	101	156	119	111	96	108	110	150	122	242	159	93	183	272	228	167
ENSG00000085231	82	28	27	32	43	25	42	115	172	3	68	115	21	118	13	7	13	118	36	102	104	67	37	42	34	42	102	113	129	116	37	7	25	10	6	10	7	7	13	10	29	10	53	13	7	13	44	51	28
ENSG00000085265	2160	385	139	317	463	3167	3620	3	1023	13	172	1030	34	817	25	9	7	23	72	2587	3272	42	0	45	98	1015	202	462	91	876	302	15	5	28	10	12	22	2	8	40	20	14	296	12	6	12	546	700	41
ENSG00000085274	13	6	0	7	3	4	6	13	27	8	17	72	7	39	13	8	1	35	15	107	74	0	0	0	6	36	4	0	9	19	5	2	14	0	3	5	10	1	3	1	0	2	16	3	2	1	18	20	6
ENSG00000085276	0	0	0	0	1	1	3	0	0	2	1	3	0	0	0	3	1	7	0	1	0	4	0	0	0	6	8	0	0	0	0	0	7	0	0	0	1	0	1	0	0	0	3	0	0	0	0	0	0
ENSG00000085365	10	27	32	2	1	6	5	3	7	117	134	149	69	144	11	54	31	168	87	225	175	30	0	49	33	13	59	44	47	53	18	25	16	2	28	19	11	5	15	4	24	7	26	26	6	19	32	24	15
ENSG00000085377	2	0	0	2	0	2	1	3	1	0	14	16	0	67	0	0	4	12	0	4	44	0	0	0	0	1	0	0	0	1	0	3	4	0	0	2	1	0	0	1	4	6	8	5	0	3	2	4	0
ENSG00000085382	1	9	1	4	2	0	1	4	5	2	3	19	31	40	0	2	0	1	24	46	14	2	4	0	0	3	3	0	0	3	0	5	7	1	3	4	2	5	0	2	2	7	21	16	0	6	9	7	2
ENSG00000085415	7	0	6	12	0	0	3	0	2	0	32	78	9	126	0	2	26	1	16	141	106	0	0	0	11	1	0	10	31	14	19	0	1	2	0	0	0	0	0	0	2	0	20	3	1	14	17	13	0
ENSG00000085433	15	3	0	0	0	10	1	0	11	4	9	17	10	15	9	16	0	0	0	40	28	2	0	0	0	30	0	0	31	0	2	1	5	0	0	1	1	0	0	4	1	0	10	1	1	0	6	3	0
ENSG00000085449	39	42	44	3	21	33	33	20	3	93	163	197	151	224	79	62	57	68	52	287	229	73	33	38	49	110	62	60	69	107	39	8	11	22	30	16	7	2	13	8	31	18	38	46	8	24	23	59	15
ENSG00000085465	0	0	0	0	0	0	0	0	0	0	4	0	0	7	0	2	0	0	0	13	4	0	0	0	0	0	0	0	0	0	0	0	0	0	0	0	0	0	0	0	0	0	5	0	0	0	1	0	1
ENSG00000085491	39	0	17	0	1	6	5	4	1	1	15	70	1	37	4	0	0	0	4	113	60	1	0	0	0	0	1	3	4	20	4	1	1	1	0	1	0	7	0	2	0	3	7	3	1	7	16	10	11
ENSG00000085511	14	0	4	25	15	4	12	13	17	24	19	57	31	111	7	2	8	27	32	99	67	0	27	0	8	29	19	1	10	27	3	11	3	15	16	9	2	7	4	7	11	9	20	1	0	16	28	25	13
ENSG00000085514	247	125	20	54	24	197	166	10	75	5	32	300	2	135	12	0	13	4	45	387	537	13	29	16	0	126	15	22	13	86	77	4	2	20	12	4	3	4	8	4	13	5	78	1	1	11	107	130	16
ENSG00000085552	0	0	0	0	0	0	0	0	0	0	0	1	0	0	0	1	0	1	0	0	0	0	0	0	0	0	0	0	0	0	0	0	0	0	0	0	0	0	0	0	0	0	0	0	0	0	0	0	0
ENSG00000085563	13	9	0	4	2	3	3	30	0	0	63	191	1	64	0	4	1	25	0	281	134	0	0	0	0	0	0	0	0	53	13	9	9	6	3	5	4	1	1	1	0	4	20	7	3	11	35	31	1
ENSG00000085644	0	0	0	0	0	0	0	0	0	0	0	0	0	0	0	0	0	0	1	0	0	2	0	0	0	0	0	0	0	0	0	0	0	0	0	0	0	1	0	0	1	0	0	0	0	0	0	0	0
ENSG00000085662	193	65	62	39	39	124	199	232	146	90	182	297	109	326	1	26	62	252	126	357	607	210	102	245	176	203	97	182	57	427	24	32	30	17	17	22	17	13	20	17	20	29	117	45	40	39	117	128	10
ENSG00000085719	257	31	6	36	54	142	119	313	174	61	126	320	24	268	2	45	68	183	87	601	408	11	35	57	26	119	97	49	201	32	48	28	42	31	21	33	19	26	32	17	39	21	92	26	14	38	84	97	15
ENSG00000085721	3	8	0	1	0	0	2	0	1	2	60	110	0	149	8	0	8	37	3	186	175	0	0	0	0	1	0	1	0	1	11	3	2	6	0	8	1	3	5	3	7	0	25	6	1	7	22	27	3
ENSG00000085733	184	224	248	174	244	542	460	622	260	1317	905	789	1278	1727	411	653	715	658	877	955	993	900	867	846	566	974	2730	2010	1799	1416	313	170	307	169	177	138	238	137	311	127	368	207	379	658	224	319	134	298	220
ENSG00000085741	0	3	0	0	1	2	8	1	4	0	1	3	3	2	2	1	3	1	1	16	6	12	0	2	3	0	9	20	10	1	0	0	0	1	0	0	7	1	1	1	1	0	4	0	0	0	1	1	0
ENSG00000085760	83	22	12	28	24	26	20	58	83	5	58	116	20	120	20	14	20	147	20	217	254	4	36	20	8	1	0	12	0	77	10	16	22	16	5	14	12	15	19	17	17	21	28	20	10	23	31	48	8
ENSG00000085788	12	4	0	14	16	7	3	6	2	0	7	20	4	38	1	4	9	152	17	93	79	0	0	1	0	0	75	11	2	20	2	6	1	4	3	3	3	1	10	1	7	1	23	0	1	23	8	23	0
ENSG00000085831	0	0	0	0	0	0	0	0	0	0	0	2	0	0	0	0	0	0	0	5	4	0	0	0	0	0	0	0	0	0	0	0	0	0	0	0	0	0	0	0	2	0	0	0	0	0	0	1	0
ENSG00000085832	113	155	154	81	46	52	32	47	15	495	613	682	378	589	122	306	200	343	430	1059	1259	1	47	26	16	93	154	135	37	146	148	52	77	55	30	56	90	30	81	42	87	53	149	130	39	135	115	163	65
ENSG00000085840	0	1	0	0	0	0	0	0	0	0	1	3	0	17	0	0	7	8	0	0	6	0	0	0	0	0	0	0	0	0	0	0	0	2	0	0	0	0	0	0	0	0	1	0	0	0	4	2	0
ENSG00000085871	62	12	1	0	4	41	53	13	60	3	19	62	5	49	4	1	9	18	2	60	78	0	27	32	0	0	22	0	0	22	15	1	8	1	0	2	6	3	1	2	4	0	14	10	3	2	23	23	3
ENSG00000085872	3	0	0	1	1	10	4	0	1	0	1	8	2	8	0	0	3	2	0	20	4	0	0	0	1	1	1	1	0	1	1	1	0	1	0	4	0	0	0	0	0	4	3	0	2	1	3	5	3
ENSG00000085978	1	2	0	2	0	0	4	0	3	1	23	30	0	50	23	0	15	17	8	154	67	0	0	0	0	0	11	3	0	3	6	1	8	2	6	8	11	3	10	0	0	2	5	7	1	11	10	17	5
ENSG00000085982	5	1	1	13	3	16	12	0	42	0	0	38	0	40	0	2	10	6	2	55	43	0	0	0	0	0	0	0	0	1	0	2	10	2	32	10	2	0	0	3	0	2	17	0	4	1	8	27	0
ENSG00000085998	13	12	50	5	0	0	1	0	30	0	21	57	24	95	0	0	0	35	10	131	63	0	0	0	0	42	67	11	0	1	14	2	7	5	0	1	0	7	1	0	5	8	5	0	2	7	19	35	6
ENSG00000085999	0	0	0	0	0	1	0	0	0	0	0	6	0	0	0	0	0	0	0	1	0	0	0	0	0	0	0	0	0	0	0	0	0	0	0	0	0	0	0	0	0	0	4	0	0	0	0	0	0
ENSG00000086015	0	0	1	2	0	3	0	0	5	0	9	3	0	17	3	1	1	0	0	43	13	0	0	0	0	0	0	0	0	0	0	5	0	0	0	0	0	0	0	0	0	0	0	4	0	0	6	3	3
ENSG00000086061	320	59	29	96	62	228	256	172	353	151	254	637	62	836	12	21	45	405	123	906	860	127	96	64	61	398	124	178	189	487	87	29	70	44	58	60	37	21	26	20	65	41	235	64	25	54	195	254	41
ENSG00000086062	10	3	4	5	3	10	5	7	3	16	3	7	10	23	1	7	3	0	0	40	10	18	2	2	0	1	1	1	17	6	1	1	1	0	1	3	3	0	1	0	4	0	7	9	0	1	5	4	7
ENSG00000086065	209	125	215	101	144	271	176	218	169	638	330	487	297	530	76	107	130	581	366	424	677	612	284	377	345	568	977	800	540	449	127	74	98	43	34	55	130	46	90	16	90	56	195	67	71	55	126	127	57
ENSG00000086102	13	21	139	9	7	5	10	6	49	94	104	190	120	261	6	47	55	151	64	358	418	33	34	37	23	10	71	40	39	10	70	25	26	34	19	9	42	4	19	10	22	4	97	13	7	29	44	70	5
ENSG00000086159	0	0	0	0	0	0	0	0	0	0	0	0	0	0	1	0	0	0	0	0	0	0	0	0	0	0	0	0	0	0	0	0	0	0	0	0	0	0	0	0	0	0	0	0	0	0	0	0	0
ENSG00000086189	46	0	12	11	14	22	5	67	66	17	58	93	4	84	0	7	13	0	18	139	113	40	32	0	0	49	1	69	69	104	3	1	9	4	1	1	10	4	6	3	0	6	31	14	0	3	32	50	2
ENSG00000086200	13	40	27	40	7	24	17	27	37	110	223	145	113	96	2	28	24	127	32	85	59	81	26	173	43	52	18	6	35	318	7	39	10	18	4	13	19	22	46	3	24	21	9	27	9	16	31	12	19
ENSG00000086205	0	0	1	0	0	0	0	0	0	0	0	0	0	0	0	0	0	0	0	0	0	0	0	0	0	0	0	0	0	0	0	0	0	0	0	0	0	0	0	0	0	0	0	0	0	0	0	0	0
ENSG00000086232	183	519	1082	206	266	1184	1063	326	167	2910	3557	1475	3823	2902	716	1480	2805	1554	3510	1892	1722	2362	2148	1067	610	1398	1729	2619	2588	3068	502	468	588	436	216	135	367	348	409	425	809	359	913	1226	334	953	497	703	532
ENSG00000086288	9	9	0	0	1	0	7	0	1	0	13	29	0	1	0	0	0	2	1	20	4	0	0	0	0	0	0	32	0	27	3	0	7	1	0	1	0	1	0	0	4	0	15	4	0	14	4	5	5
ENSG00000086289	0	0	0	0	1	2	0	0	0	7	3	2	1	5	0	0	0	0	0	0	0	1	10	0	0	0	0	0	2	3	0	0	0	0	0	1	0	0	0	0	2	0	0	0	2	0	0	0	1
ENSG00000086300	65	25	22	37	13	51	54	6	3	9	7	86	4	45	2	3	5	30	28	152	110	26	25	0	0	39	20	3	3	77	11	11	16	4	14	12	18	6	1	14	4	6	25	1	8	13	23	35	24
ENSG00000086475	23	4	0	18	80	11	8	0	4	9	18	25	15	40	0	12	0	2	4	49	76	0	0	0	0	0	0	2	0	6	7	0	5	0	0	5	0	7	9	4	4	0	13	1	4	3	10	5	1
ENSG00000086504	68	9	17	35	52	114	76	187	77	51	36	44	53	53	7	13	24	54	39	115	75	39	84	48	32	28	333	83	70	108	29	9	9	6	8	13	3	10	8	9	8	20	53	14	8	8	31	31	8
ENSG00000086506	4	7	24	17	21	95	68	102	11	53	41	35	80	48	21	21	120	30	35	19	45	33	113	34	16	24	119	92	72	30	45	19	44	27	19	18	34	15	28	12	59	34	53	32	44	29	19	16	17
ENSG00000086544	1	0	0	0	0	2	2	0	2	1	0	0	0	0	1	0	0	0	0	0	4	0	0	0	0	0	0	0	0	0	0	0	0	0	0	0	0	0	0	2	0	0	0	0	0	0	0	0	0
ENSG00000086548	0	0	0	0	0	0	2	0	0	0	0	4	0	0	0	0	0	0	0	0	2	1	0	0	0	0	0	0	0	0	0	0	0	0	0	0	0	0	0	0	0	0	0	0	0	0	0	0	0
ENSG00000086570	0	0	1	0	0	0	0	0	0	0	0	0	0	0	0	0	0	0	0	0	0	0	0	0	0	0	0	0	0	0	0	0	0	1	0	2	0	0	1	0	0	0	0	0	0	0	1	0	0
ENSG00000086589	76	1	11	22	44	10	53	1	1	25	83	222	19	216	19	24	10	55	19	394	388	15	29	20	41	59	9	149	0	78	28	14	35	14	12	11	8	4	16	2	11	3	61	27	17	14	48	98	18
ENSG00000086598	7	20	14	2	1	6	4	0	2	89	79	248	49	204	33	30	11	22	40	321	322	32	21	27	11	95	46	75	33	71	41	7	30	1	7	5	3	4	16	6	15	9	49	22	6	11	71	77	7
ENSG00000086619	8	5	5	6	10	11	2	1	31	2	7	19	9	10	2	13	3	10	35	23	23	0	2	0	0	0	18	0	0	3	1	1	2	0	16	5	8	0	5	3	3	1	7	6	5	4	13	7	5
ENSG00000086666	265	306	260	385	346	463	427	754	476	1277	1242	896	835	808	208	370	415	1637	755	584	986	642	644	807	515	1094	678	935	547	1255	181	254	186	146	178	145	228	142	153	114	275	78	306	355	113	248	375	144	222
ENSG00000086696	0	0	0	0	0	0	0	0	0	0	0	0	0	0	0	0	0	0	0	0	0	0	0	0	0	0	0	0	0	0	0	0	0	0	0	0	0	0	0	0	0	0	0	0	0	0	0	0	0
ENSG00000086712	11	5	5	8	6	7	9	0	66	0	2	18	19	21	6	12	2	2	7	52	12	0	0	0	0	36	0	1	0	35	0	11	10	3	16	2	3	2	1	6	0	4	13	6	0	7	14	8	9
ENSG00000086717	0	0	0	0	0	0	0	0	0	0	2	0	0	0	0	0	0	0	0	0	0	0	0	0	0	0	0	0	0	0	0	0	0	0	0	0	0	0	0	0	0	0	0	0	0	0	0	0	0
ENSG00000086730	174	70	18	65	29	101	184	30	27	21	80	315	41	168	10	14	29	33	99	476	601	0	0	25	13	225	38	3	56	228	53	9	11	3	11	7	4	10	16	21	13	14	97	14	15	16	134	100	22
ENSG00000086758	52	43	59	11	7	45	48	8	106	78	115	371	69	424	85	67	57	378	181	374	448	63	21	0	2	79	53	3	24	19	64	59	70	26	41	53	44	38	26	38	21	54	131	66	26	70	52	60	43
ENSG00000086827	2	1	0	1	0	0	2	0	48	0	15	66	11	31	20	0	0	86	0	133	103	0	0	0	0	0	0	0	0	21	0	4	0	7	1	0	0	2	0	0	1	0	15	7	0	0	19	11	2
ENSG00000086848	0	0	2	0	0	0	0	0	0	0	0	0	0	0	0	0	0	0	0	0	0	0	0	0	0	0	0	0	0	0	0	0	0	0	0	0	0	0	0	0	0	0	0	0	0	0	0	0	0
ENSG00000086967	1	0	1	0	0	0	0	0	0	0	10	4	0	0	1	0	3	0	3	0	7	0	0	0	0	0	0	0	0	0	0	0	0	0	0	0	0	0	0	2	0	0	2	0	0	0	0	3	0
ENSG00000086991	0	0	0	0	1	0	0	0	0	0	0	0	0	0	0	0	0	0	0	0	0	0	0	0	0	0	0	0	0	0	0	0	0	0	1	0	0	0	0	0	0	0	0	0	0	0	0	0	0
ENSG00000087008	14	1	0	2	0	0	9	0	3	12	14	96	14	55	1	0	0	75	2	105	65	65	0	0	0	0	31	43	1	12	14	12	11	1	0	1	4	0	7	1	8	2	36	4	1	0	15	15	3
ENSG00000087053	16	70	214	4	21	33	16	113	1	328	454	698	681	627	185	371	299	338	328	549	460	75	78	89	53	300	144	144	146	149	110	33	40	24	6	18	77	48	75	39	75	82	165	140	62	116	46	92	63
ENSG00000087074	40	19	22	42	34	76	112	62	20	79	30	21	39	43	18	26	27	29	46	42	28	95	121	70	31	103	227	194	143	115	18	15	11	17	9	8	16	6	28	11	16	13	38	20	14	22	19	9	17
ENSG00000087076	3	0	0	0	0	6	1	0	0	0	0	0	5	7	0	0	0	0	0	4	0	0	0	0	0	0	29	16	11	0	0	0	1	4	0	0	0	0	0	0	0	0	0	0	0	0	0	0	0
ENSG00000087077	1	0	0	0	0	4	0	1	7	0	0	0	0	1	0	1	0	8	0	1	0	0	0	0	0	0	7	0	0	10	0	3	2	0	0	0	1	0	0	0	0	0	5	1	0	2	1	1	0
ENSG00000087085	0	0	0	0	0	0	0	0	0	0	0	0	0	0	0	0	0	0	0	0	0	0	0	0	0	0	0	0	0	0	0	0	0	0	0	0	0	0	0	0	0	0	0	0	0	0	0	0	0
ENSG00000087086	27605	10360	13354	9893	15883	34587	41480	46369	15448	32276	31754	36015	32155	37005	8044	11651	15712	27772	35876	24855	46949	38756	37848	38020	28866	55875	57220	46334	38661	52032	12412	4126	6483	4843	5165	3628	7731	4573	8036	4690	6527	5340	12865	9275	5789	9172	9022	10642	3941
ENSG00000087087	55	65	10	17	11	35	49	9	77	25	100	213	27	237	13	8	37	121	91	381	328	92	0	59	18	129	80	0	1	72	40	39	21	29	23	29	21	15	27	18	16	52	67	37	4	49	92	66	28
ENSG00000087088	13	12	3	1	6	5	20	19	2	22	13	13	5	15	3	0	7	2	12	35	26	0	17	0	0	5	7	36	28	20	3	3	0	2	1	0	4	1	7	0	4	4	21	16	2	3	18	3	9
ENSG00000087095	20	80	62	23	19	35	39	61	7	277	172	195	148	87	80	113	118	209	240	175	108	42	32	15	26	20	27	37	54	25	37	66	51	23	32	29	52	20	33	17	58	37	31	46	24	39	18	24	21
ENSG00000087111	3	12	26	12	0	7	21	0	2	28	31	112	17	75	21	16	13	45	1	174	228	64	14	0	10	79	103	55	48	78	14	3	12	4	26	7	6	3	10	4	0	4	48	11	14	15	62	25	12
ENSG00000087116	0	0	0	0	0	0	0	0	0	0	0	0	0	0	0	0	0	0	0	0	0	0	0	0	0	0	0	0	0	0	0	0	0	0	0	0	0	0	0	0	0	0	0	0	0	0	0	0	0
ENSG00000087128	0	0	0	0	0	0	0	0	0	0	0	0	0	0	0	0	0	0	0	0	0	0	0	0	0	0	0	0	0	0	0	0	0	0	0	0	0	0	0	0	0	0	0	0	0	2	0	0	0
ENSG00000087152	6	1	10	4	0	9	3	4	10	4	2	3	12	6	1	9	10	9	4	1	21	3	2	1	1	5	17	3	3	11	7	10	1	3	3	5	3	4	13	1	2	6	5	4	2	4	2	3	2
ENSG00000087157	5	13	18	0	4	9	21	1	22	22	17	54	23	26	0	17	13	16	3	85	43	56	32	13	37	55	65	32	18	100	6	0	13	7	0	1	2	4	5	0	3	5	34	4	5	7	17	8	5
ENSG00000087191	448	133	134	145	249	547	634	637	511	295	397	672	345	541	203	212	185	387	646	733	807	242	232	483	148	330	1226	1341	732	613	95	66	132	102	58	66	115	67	114	61	81	111	240	191	107	139	217	244	43
ENSG00000087206	142	163	339	96	110	214	250	342	214	860	833	792	948	805	257	470	539	597	620	693	1019	608	259	308	186	727	719	775	648	802	199	121	182	111	88	91	156	132	134	49	252	140	296	296	87	169	182	160	142
ENSG00000087237	106	165	189	82	133	325	301	707	120	601	409	231	471	480	148	132	212	106	326	134	419	293	209	513	206	687	750	290	441	527	49	30	95	66	15	9	27	13	127	29	64	39	69	79	41	49	36	55	59
ENSG00000087245	0	0	0	0	0	0	0	0	0	0	0	1	0	0	0	0	0	0	0	0	0	0	0	0	0	0	0	0	0	0	0	0	0	0	0	0	0	0	0	0	0	0	0	0	0	0	0	0	0
ENSG00000087250	0	0	0	0	0	0	0	0	0	0	0	0	0	1	0	0	0	2	0	0	1	0	0	0	0	0	0	0	0	0	0	0	0	0	0	0	0	0	0	0	0	0	0	0	0	0	0	0	0
ENSG00000087253	46	8	1	1	1	11	19	0	2	0	10	19	0	17	12	0	3	1	1	140	33	0	0	0	0	0	0	0	0	16	19	0	1	7	2	2	0	3	1	1	0	0	16	2	0	3	28	20	9
ENSG00000087258	28	19	24	29	35	39	43	210	72	49	58	52	82	46	20	36	50	102	82	43	73	126	170	61	55	69	112	148	107	146	21	45	57	28	8	10	16	22	19	13	10	11	13	39	17	23	13	26	26
ENSG00000087263	2	26	1	0	1	0	10	2	6	36	80	111	34	190	38	18	25	33	50	207	213	37	5	12	13	12	15	33	49	64	14	5	21	8	0	2	1	11	9	4	7	5	58	14	10	10	45	40	5
ENSG00000087266	20	4	2	4	7	13	23	0	5	0	12	35	1	36	3	1	6	7	37	97	27	16	0	0	1	28	2	30	2	36	1	5	2	6	4	3	4	2	6	11	1	13	26	5	3	7	14	21	6
ENSG00000087269	8	0	21	5	0	3	9	2	5	0	19	76	5	43	1	5	2	32	12	64	43	5	0	1	0	0	4	0	31	13	2	5	32	7	1	4	10	6	2	0	5	5	7	9	4	6	17	10	5
ENSG00000087274	33	85	70	29	24	64	67	26	40	118	180	269	116	265	48	138	120	103	121	334	220	213	71	15	53	129	124	150	153	188	78	10	15	22	13	6	26	24	30	20	38	41	52	79	48	38	67	75	39
ENSG00000087299	0	0	0	0	0	0	0	0	0	0	0	0	3	19	3	2	10	1	12	14	0	0	0	0	0	0	0	0	0	0	0	0	0	0	0	0	8	0	0	0	0	0	0	0	0	0	0	3	0
ENSG00000087301	24	14	27	3	8	15	8	8	4	76	29	23	31	42	20	7	16	64	9	74	58	119	0	1	1	0	40	3	1	12	13	13	21	13	1	11	2	4	5	3	24	9	12	12	8	4	22	10	14
ENSG00000087302	473	117	103	247	145	218	246	475	492	341	455	447	244	668	50	144	62	386	268	560	777	294	279	113	285	430	409	209	81	604	119	45	137	46	44	45	49	66	48	34	104	64	216	108	35	83	227	199	50
ENSG00000087303	1	5	0	3	0	3	0	0	0	19	82	38	16	33	1	35	17	17	27	0	5	0	0	0	10	0	1	0	0	31	7	18	19	0	5	1	8	0	5	3	0	8	10	14	0	7	1	9	4
ENSG00000087338	31	0	20	5	1	11	12	5	40	23	43	7	17	96	4	23	21	49	4	129	30	51	0	28	0	1	12	45	42	33	2	12	5	6	1	4	2	11	13	5	1	4	12	3	3	12	38	14	9
ENSG00000087365	302	220	166	109	92	183	211	168	324	254	613	1237	306	1608	189	170	218	877	803	1966	2119	204	65	124	109	147	386	288	397	349	217	130	178	119	98	80	95	58	91	72	121	91	553	187	58	196	445	384	93
ENSG00000087448	0	1	0	0	0	1	0	0	8	0	0	1	0	0	1	2	1	0	0	1	0	0	0	0	0	0	0	0	0	1	0	0	0	0	0	0	0	0	0	0	0	0	0	0	0	1	2	2	0
ENSG00000087460	2674	2306	2805	2254	3426	5230	6107	10101	3095	10170	8060	7031	8140	7038	2843	3834	6083	10617	10302	4476	7637	9795	7065	8679	6261	9556	12195	9966	8228	10148	2182	1769	2088	2157	1751	1042	2174	1620	2017	1356	2749	1375	2070	2916	1603	2317	1308	1844	1244
ENSG00000087470	43	89	164	47	46	122	111	123	35	1036	941	720	884	772	370	286	297	309	360	741	649	269	246	415	196	173	931	1100	553	230	224	36	105	115	76	62	81	54	96	53	88	54	268	203	69	275	72	125	62
ENSG00000087494	0	0	0	0	0	0	0	0	0	0	0	0	0	0	0	0	0	0	0	0	0	0	0	0	0	0	0	0	0	0	0	0	0	0	0	0	0	0	0	0	0	0	0	0	0	0	0	0	0
ENSG00000087495	3	0	15	0	4	6	4	11	0	71	43	34	24	1	1	25	19	4	2	4	23	46	1	0	13	21	58	5	0	22	7	0	2	11	6	3	0	7	11	4	1	1	19	3	0	2	0	0	0
ENSG00000087502	143	18	5	97	16	75	53	126	120	58	236	429	107	361	10	19	59	231	66	434	503	167	98	91	0	118	121	118	50	150	15	22	36	14	11	35	3	8	6	33	45	13	143	15	17	71	97	99	26
ENSG00000087510	0	0	0	0	0	0	0	0	0	0	0	0	0	0	0	0	0	0	0	0	0	0	0	0	0	0	0	0	0	0	0	0	0	0	0	0	0	0	0	0	0	0	0	0	0	0	0	0	0
ENSG00000087586	2	5	3	3	9	4	4	5	49	3	18	15	9	22	0	0	4	3	8	8	2	0	0	20	0	0	1	0	3	0	1	2	0	6	2	0	0	4	2	0	4	0	2	4	2	2	1	8	0
ENSG00000087589	1	15	4	1	8	17	2	0	63	50	24	37	34	42	8	18	15	38	6	36	57	12	43	11	15	8	20	1	15	15	5	4	10	1	12	3	5	1	3	3	1	1	8	14	0	15	6	10	4
ENSG00000087842	0	0	0	0	1	0	1	28	0	3	1	0	6	3	1	4	0	14	7	0	4	0	0	0	0	0	0	0	0	28	1	2	0	0	0	0	0	0	0	0	0	0	0	0	0	0	6	0	1
ENSG00000087884	9	1	0	2	0	2	1	8	0	1	0	18	1	3	0	1	5	5	0	3	2	0	0	0	1	21	7	3	4	2	1	0	1	1	0	2	1	0	3	0	5	1	4	3	0	1	7	6	0
ENSG00000087903	8	5	3	3	3	8	21	29	11	13	22	48	14	19	2	15	15	7	0	48	12	22	35	11	22	8	35	52	14	21	11	12	10	5	18	0	9	7	17	2	6	2	9	12	2	10	6	7	9
ENSG00000087916	0	0	0	0	0	0	0	0	0	0	0	0	0	0	0	0	0	0	0	0	0	0	0	0	0	0	0	0	0	0	0	0	0	0	0	0	0	0	0	0	0	0	0	0	0	0	0	0	0
ENSG00000087995	2	7	0	3	0	6	2	0	0	0	10	24	3	28	0	0	0	7	38	39	15	0	0	15	0	0	0	0	0	26	3	3	0	1	0	0	0	0	0	0	0	4	8	4	2	2	8	5	0
ENSG00000088002	1	0	0	0	0	0	0	0	0	0	0	0	0	1	0	0	0	1	0	0	0	0	0	0	0	0	0	0	0	0	0	0	0	0	1	0	0	0	0	0	0	0	0	0	0	0	0	0	0
ENSG00000088035	7	0	5	9	2	3	6	0	15	0	39	138	17	187	0	1	1	44	39	204	243	2	0	0	0	65	0	0	69	34	3	1	20	10	0	4	2	0	5	2	0	6	35	19	3	18	30	24	0
ENSG00000088038	11	0	0	5	12	20	12	57	0	6	8	8	2	8	1	0	1	4	0	9	3	2	12	0	2	4	26	3	54	2	0	0	6	4	3	2	3	5	12	7	0	2	7	2	1	7	1	7	3
ENSG00000088053	177	81	142	187	186	512	595	857	115	433	205	209	261	256	79	171	191	83	177	202	258	738	646	479	347	746	1347	1153	982	720	79	52	81	65	38	49	73	28	138	30	82	59	263	165	50	111	46	74	76
ENSG00000088179	113	3	1	13	14	16	25	38	112	14	113	334	89	258	36	31	59	275	61	392	326	46	67	72	29	35	35	79	57	41	56	25	40	32	30	24	13	16	44	8	7	20	88	43	19	73	92	111	37
ENSG00000088205	77	8	22	40	17	27	41	68	79	19	126	216	23	374	12	14	12	131	111	412	459	11	3	36	12	30	24	5	5	109	33	13	47	13	16	25	17	18	16	12	22	18	101	10	18	29	106	83	26
ENSG00000088247	1	0	0	0	0	5	6	0	0	0	0	0	0	1	0	0	0	0	1	0	0	1	0	0	0	0	1	1	0	0	2	0	0	0	0	0	0	0	0	0	0	3	1	1	1	0	0	0	0
ENSG00000088256	0	0	0	0	0	0	0	0	0	2	0	0	0	0	0	0	0	0	0	0	0	0	0	0	0	0	0	0	0	0	0	0	0	0	0	0	0	0	0	0	0	0	0	0	0	0	0	0	0
ENSG00000088280	0	6	0	0	0	0	0	0	0	0	1	0	0	1	3	8	0	0	0	1	0	0	0	0	0	0	12	0	0	11	0	0	0	0	0	0	8	0	0	0	0	0	0	0	0	1	0	0	0
ENSG00000088298	48	45	24	42	14	33	31	54	54	21	28	142	10	120	15	16	4	81	18	201	198	0	71	0	14	0	41	6	75	82	13	3	8	7	25	11	6	3	9	15	10	2	38	11	4	4	38	61	7
ENSG00000088305	0	6	0	0	0	1	1	0	0	1	1	4	5	13	0	0	1	0	3	6	5	0	0	0	0	0	1	0	0	8	0	0	0	0	1	0	0	0	1	1	0	0	3	2	0	0	0	6	0
ENSG00000088320	0	0	0	0	0	0	0	0	0	0	0	1	0	0	0	0	0	0	0	0	0	0	0	0	0	0	0	0	0	0	0	0	0	0	0	0	0	0	0	0	0	0	0	0	0	0	0	0	0
ENSG00000088325	5	2	0	6	0	4	2	0	56	4	11	2	0	13	0	1	1	0	0	7	43	51	54	77	50	176	337	158	115	12	9	1	6	4	3	0	0	0	0	1	7	0	7	0	0	0	17	4	4
ENSG00000088340	0	0	0	0	0	0	0	0	1	0	3	0	0	0	0	1	0	0	0	0	0	0	0	0	0	0	0	0	0	0	0	0	1	0	0	1	0	0	0	0	0	0	0	0	0	0	0	1	0
ENSG00000088356	35	0	0	12	19	32	13	0	22	1	5	32	6	13	4	0	9	26	20	30	35	0	0	2	11	5	20	37	14	56	13	1	8	0	0	2	5	0	5	7	3	0	8	9	3	9	13	19	6
ENSG00000088367	0	0	1	0	0	0	0	0	0	0	0	3	6	0	0	0	1	17	0	3	11	0	0	0	0	22	0	0	0	0	0	0	0	0	0	0	0	0	0	2	0	0	0	0	2	3	0	1	0
ENSG00000088386	0	0	0	0	0	0	0	0	0	0	0	0	0	0	0	0	1	0	0	0	0	0	0	0	0	0	0	0	0	0	0	1	0	0	0	0	0	0	0	0	0	0	0	0	0	1	0	1	0
ENSG00000088387	1	20	3	0	1	5	2	2	1	12	38	110	0	101	1	3	24	21	42	265	89	0	0	0	0	1	0	0	0	0	3	6	21	6	1	8	5	6	2	2	0	4	14	13	2	17	27	20	0
ENSG00000088448	28	40	51	24	28	49	41	47	21	98	109	103	93	243	37	65	83	125	104	228	223	92	19	58	76	114	177	225	127	145	57	10	19	17	15	11	11	14	17	11	17	16	80	55	11	31	37	52	15
ENSG00000088451	23	0	10	12	10	1	17	0	0	24	27	154	1	131	0	31	10	40	14	207	120	5	70	69	55	20	21	0	79	53	8	0	17	2	11	5	9	8	1	2	1	6	65	4	12	21	26	55	9
ENSG00000088538	0	0	0	0	0	0	0	0	0	0	2	0	0	0	0	0	0	1	0	0	0	0	0	0	0	0	0	0	0	0	0	0	0	0	0	0	0	0	0	0	0	0	0	0	0	1	0	1	0
ENSG00000088543	1	0	0	0	0	0	1	8	0	0	0	2	0	0	0	0	0	0	0	0	0	0	0	0	0	0	0	0	0	0	0	0	0	1	2	0	0	0	0	0	0	0	2	0	0	0	0	0	0
ENSG00000088682	21	9	2	13	29	5	17	38	0	38	18	58	43	81	2	4	3	23	27	88	89	16	1	0	21	18	40	44	2	102	2	0	2	8	0	2	6	15	0	1	0	3	36	7	8	4	23	10	0
ENSG00000088726	721	626	1237	1289	1825	2667	2290	4870	1125	5199	2975	2173	3381	2243	786	1512	1709	2934	2936	1020	2586	3511	3702	2485	2394	6693	6844	5926	4982	5894	771	799	719	655	572	595	836	420	907	527	1031	649	1492	1393	561	725	846	483	809
ENSG00000088727	6	0	0	0	0	0	2	1	0	4	3	2	0	6	4	13	2	7	4	0	6	0	0	0	13	6	0	45	1	0	1	3	1	0	2	0	1	0	0	2	0	0	1	0	2	0	2	3	1
ENSG00000088756	0	0	0	0	0	0	0	0	0	0	0	0	0	0	0	0	0	0	0	0	0	0	0	0	0	0	0	0	0	0	0	0	0	0	0	0	0	1	0	0	0	0	1	0	0	1	0	0	1
ENSG00000088766	23	14	10	18	8	25	18	52	0	39	43	53	27	44	21	3	21	85	42	21	26	2	61	66	42	32	15	16	7	5	6	7	16	15	9	4	23	2	0	4	17	4	11	30	4	11	11	11	11
ENSG00000088782	0	0	0	0	0	0	0	0	0	0	0	0	0	0	0	0	0	0	0	0	0	0	0	0	0	0	0	0	0	0	0	0	0	0	0	0	0	0	0	0	0	0	0	0	0	0	0	0	0
ENSG00000088808	1	0	0	0	0	0	0	0	1	0	1	2	0	0	0	0	0	4	5	0	9	0	0	0	0	0	0	0	0	0	1	2	1	0	0	0	0	0	0	1	2	3	1	3	1	0	2	1	0
ENSG00000088812	5	5	3	0	5	4	5	2	3	1	8	13	0	3	0	1	0	12	3	4	46	0	0	0	0	0	0	0	0	0	0	1	0	8	0	0	2	0	2	0	1	3	5	3	2	5	8	3	3
ENSG00000088826	293	338	483	293	340	672	948	562	308	1632	945	565	993	1709	484	687	681	527	1117	718	1277	1528	1988	1090	630	2590	3691	3350	2825	2722	252	213	198	187	136	146	187	126	269	173	259	138	385	461	162	205	216	227	186
ENSG00000088827	2	9	1	1	0	0	0	0	0	0	4	3	0	4	2	0	0	0	3	14	5	0	0	0	0	0	0	0	0	0	0	2	0	0	0	0	1	0	0	7	0	0	3	0	0	0	2	3	0
ENSG00000088832	337	559	855	243	278	648	1139	905	220	2456	2276	2255	3055	2324	691	1400	1683	1521	1773	1441	2690	2380	1934	1596	1106	1841	3068	2904	2241	2017	578	463	551	534	368	287	445	301	590	269	846	507	920	1113	461	765	523	632	429
ENSG00000088833	220	40	30	54	62	212	176	92	82	118	160	244	92	323	60	42	50	284	203	229	339	183	89	48	74	450	262	358	353	419	55	30	58	28	20	19	41	17	32	32	34	30	92	44	16	59	92	82	23
ENSG00000088836	0	0	0	0	0	0	0	0	0	0	11	7	0	16	0	4	0	0	20	0	21	0	27	0	2	2	2	0	0	0	1	0	0	0	0	0	0	0	3	0	4	1	0	3	0	0	0	10	2
ENSG00000088854	13	2	0	5	2	15	4	1	3	0	6	4	0	7	0	2	0	32	19	11	21	1	1	1	0	1	6	0	0	0	5	5	0	0	1	2	0	2	1	1	2	1	1	0	3	1	15	2	7
ENSG00000088876	0	0	0	2	2	1	0	2	0	0	0	0	0	0	0	0	1	0	0	0	0	0	0	0	0	1	0	0	0	0	1	0	1	2	2	3	0	1	0	1	0	0	0	0	1	1	1	1	2
ENSG00000088881	0	0	0	0	0	0	0	0	0	0	0	0	0	0	0	0	0	0	0	0	0	0	0	0	0	0	0	0	0	0	0	0	0	0	0	0	0	0	0	0	0	0	0	0	0	0	0	0	0
ENSG00000088882	0	0	0	0	0	0	0	0	0	0	0	0	0	0	0	0	0	0	0	0	4	0	0	0	0	0	0	0	0	0	0	0	0	0	4	0	0	0	0	0	0	0	0	0	0	0	2	0	0
ENSG00000088888	15	17	21	15	13	31	59	93	6	135	83	127	171	143	49	69	101	68	108	117	162	115	174	102	94	124	76	189	192	155	30	26	40	18	34	6	20	8	31	21	29	24	69	54	44	46	27	47	19
ENSG00000088899	0	0	0	0	0	0	0	0	0	0	0	0	0	0	0	0	0	0	0	0	0	0	0	0	0	0	0	0	0	0	0	0	0	0	0	0	0	0	0	0	0	0	0	0	0	1	0	0	0
ENSG00000088926	0	0	0	0	0	0	0	0	0	0	0	0	0	0	0	0	0	0	0	0	0	0	0	0	0	0	0	0	0	0	0	0	0	0	0	0	0	0	0	0	0	0	0	0	0	0	0	0	0
ENSG00000088930	642	149	60	166	59	128	194	72	153	21	395	770	73	880	102	98	97	357	84	1339	1635	0	16	169	10	291	117	32	27	246	127	52	91	70	51	47	67	60	63	43	36	68	370	104	66	115	260	261	75
ENSG00000088970	31	18	7	9	3	14	8	0	21	17	72	68	17	67	4	8	16	12	30	88	126	1	12	0	0	2	0	28	0	47	16	11	22	7	0	6	6	3	7	8	2	12	28	5	4	25	33	32	5
ENSG00000088986	651	551	1133	942	1642	1772	1969	3733	1407	3919	3036	1825	1962	1377	459	1151	1404	2379	1829	643	2137	2738	3476	2828	2216	3654	4714	3343	2857	3455	592	859	526	513	427	434	722	390	601	351	790	324	731	970	344	572	599	273	487
ENSG00000088992	16	6	1	6	18	44	104	4	17	21	13	23	14	25	14	4	28	34	21	30	30	12	3	11	25	57	18	46	43	17	3	5	5	12	3	6	7	1	5	3	3	5	6	20	1	13	8	12	9
ENSG00000089006	244	80	93	110	88	163	196	107	649	334	298	642	277	652	94	165	139	323	134	591	740	541	201	94	238	609	285	465	398	492	93	50	109	44	25	42	70	41	52	30	74	52	173	101	42	63	109	159	30
ENSG00000089009	1329	306	323	546	332	892	849	615	1469	195	1250	1592	254	2284	208	156	202	1903	1099	1865	2426	319	328	442	215	891	346	621	267	1844	357	270	572	257	192	240	313	251	261	256	176	371	945	309	215	504	869	617	166
ENSG00000089012	12	6	1	11	8	1	2	4	47	12	74	62	17	218	19	6	3	89	22	136	122	0	0	13	0	39	11	28	2	42	13	1	15	5	0	7	5	13	2	4	1	5	30	4	4	9	29	30	3
ENSG00000089022	13	6	0	4	1	16	12	0	6	0	8	18	21	34	0	0	6	32	19	47	19	0	0	0	0	0	0	0	0	0	1	2	15	3	3	3	9	4	3	9	0	6	6	0	8	11	19	4	6
ENSG00000089041	19	41	0	7	3	7	9	3	2	0	15	23	20	25	25	1	1	4	11	102	82	14	0	0	2	27	0	19	0	4	25	3	2	4	6	2	4	5	1	4	1	3	7	3	4	5	31	4	2
ENSG00000089048	80	11	5	40	51	18	27	3	43	2	91	91	6	114	25	0	29	63	44	85	63	2	2	0	0	2	2	7	0	40	9	20	7	2	1	17	19	17	16	15	21	15	31	20	11	40	38	33	6
ENSG00000089050	2	0	0	1	0	0	0	0	0	0	3	5	0	9	0	0	0	0	0	2	8	0	0	0	0	9	0	0	0	8	0	0	0	0	0	0	0	1	2	0	0	0	4	0	0	1	5	14	0
ENSG00000089053	191	526	1254	220	262	417	679	448	336	3946	3132	3575	2831	2980	842	1864	2229	2774	1832	2586	3836	2443	2038	1632	1232	2034	2269	2531	2039	2065	804	311	462	330	314	210	453	311	416	173	646	349	882	801	317	482	468	573	260
ENSG00000089057	3	12	0	8	0	1	1	1	0	2	3	9	13	20	0	0	3	13	2	17	31	0	0	0	0	11	31	0	34	6	1	3	0	1	1	2	4	3	3	1	2	2	12	7	1	4	12	4	7
ENSG00000089060	2	0	7	4	7	0	10	0	3	0	27	69	8	169	23	0	12	38	8	103	86	0	0	0	0	18	0	7	10	7	7	1	8	4	0	0	5	2	0	0	2	2	5	0	0	0	8	11	1
ENSG00000089063	98	49	36	57	23	107	101	198	72	93	137	187	78	126	26	47	40	54	109	172	243	104	73	166	65	205	221	204	123	152	35	16	25	10	8	13	27	17	31	8	33	15	88	45	20	30	60	65	14
ENSG00000089091	0	0	0	6	3	3	0	0	5	0	0	3	9	8	0	0	0	5	3	0	0	0	0	0	0	0	3	0	25	0	0	0	5	0	0	0	2	0	0	0	2	0	2	0	0	0	2	8	1
ENSG00000089094	2	4	0	2	3	3	3	0	0	0	19	27	0	31	1	1	5	29	16	34	27	0	0	0	0	2	36	0	0	10	4	5	11	7	1	3	0	2	4	5	1	2	5	2	11	9	20	6	0
ENSG00000089101	1	0	0	0	0	0	0	0	0	0	0	0	1	0	0	0	0	0	0	0	0	0	0	0	0	0	0	0	0	0	0	0	0	0	0	0	0	0	0	0	0	0	0	1	0	0	0	0	0
ENSG00000089116	0	0	0	0	0	0	0	0	0	0	0	0	0	0	0	0	0	0	0	0	0	0	0	0	0	0	0	0	0	0	0	0	0	0	0	0	0	0	0	0	0	0	0	0	0	0	0	0	0
ENSG00000089123	30	15	15	14	28	1	1	55	0	2	44	73	25	82	5	5	12	75	17	111	96	0	1	0	6	0	17	0	0	44	5	4	16	6	3	12	1	6	0	1	9	16	19	13	14	14	34	38	8
ENSG00000089127	101	29	1	16	6	49	84	6	22	25	36	112	6	84	9	2	8	32	22	278	381	0	20	14	10	105	3	7	8	35	15	9	9	10	13	3	5	4	5	6	4	0	51	5	2	16	43	67	5
ENSG00000089154	3	8	30	1	3	4	3	4	2	0	45	101	1	179	26	5	7	73	37	125	130	0	1	0	0	1	0	53	0	45	6	14	12	9	2	22	1	10	6	8	6	9	37	13	5	23	37	55	10
ENSG00000089157	2441	602	647	1162	951	1927	2308	1684	3663	376	2401	3567	609	5147	287	252	423	2978	1867	5312	5586	1271	846	1060	603	3046	1345	1769	1045	6148	669	467	767	453	292	394	427	368	304	418	362	484	1851	497	215	764	1948	1610	260
ENSG00000089159	9	9	2	1	2	7	5	3	4	6	13	85	5	77	14	1	3	3	15	172	96	4	0	0	1	4	12	20	0	21	8	6	1	2	0	2	4	1	3	1	1	5	36	4	1	9	20	36	2
ENSG00000089163	1	0	0	0	0	0	0	0	0	0	0	0	0	1	1	0	0	0	2	0	3	0	0	0	0	0	0	0	0	0	0	0	2	0	0	0	0	0	3	0	0	0	0	0	0	0	0	0	0
ENSG00000089169	3	0	0	0	0	1	0	0	22	0	0	2	0	5	1	0	1	0	5	5	12	0	0	0	0	0	0	0	0	0	0	0	0	0	0	0	0	0	0	2	0	0	0	0	0	1	1	3	1
ENSG00000089177	17	2	1	2	1	21	16	48	0	0	41	28	4	51	1	4	0	8	2	38	52	0	0	15	0	0	0	0	0	14	2	8	9	0	0	2	20	0	9	1	0	2	5	0	3	5	22	23	26
ENSG00000089195	23	10	11	11	15	8	8	0	14	4	20	84	5	33	0	4	5	17	19	81	83	14	0	0	54	1	0	15	1	63	13	8	11	3	1	5	1	5	3	3	8	10	25	4	5	7	38	12	6
ENSG00000089199	1	0	0	0	0	0	0	0	0	0	0	3	0	0	0	0	0	0	0	0	0	0	0	0	0	0	0	0	0	0	0	0	0	0	0	0	1	0	0	0	0	0	0	0	0	0	0	0	0
ENSG00000089220	85	16	10	23	23	59	77	101	188	5	93	175	31	253	8	7	12	72	17	214	287	86	71	18	44	106	23	84	8	288	22	7	10	21	13	18	12	19	13	16	20	5	67	14	7	16	86	65	10
ENSG00000089225	0	0	0	0	0	0	0	0	0	0	0	0	0	0	0	0	0	0	0	0	0	0	0	0	0	0	0	0	0	0	0	0	0	0	0	0	0	0	0	0	0	0	0	0	0	0	0	0	0
ENSG00000089234	22	12	2	6	4	10	14	10	2	9	34	8	8	39	2	9	9	27	28	22	19	2	2	22	0	37	3	0	0	5	2	10	6	5	3	0	2	1	7	1	7	9	12	9	2	11	10	17	11
ENSG00000089248	160	26	4	59	36	73	126	67	111	9	49	128	23	113	9	9	15	65	64	127	161	32	37	28	34	75	109	58	70	200	9	13	16	10	1	13	7	8	12	18	9	5	58	29	11	19	70	44	9
ENSG00000089250	0	0	0	0	0	0	0	0	0	0	0	0	0	0	0	0	0	0	0	0	0	0	0	0	0	0	0	0	0	0	0	0	0	0	0	0	0	0	0	0	1	0	0	0	0	0	0	0	0
ENSG00000089280	31	5	17	10	15	35	25	20	47	4	33	28	5	62	7	9	13	37	35	113	44	50	1	107	6	28	17	11	5	78	8	5	12	35	8	15	19	13	11	15	25	30	63	16	18	33	72	34	9
ENSG00000089289	156	50	56	82	77	147	205	124	175	214	162	212	150	277	25	58	58	151	120	274	282	212	124	119	51	191	222	212	380	373	49	30	36	32	13	20	36	16	22	21	39	22	76	26	12	38	96	55	14
ENSG00000089327	1237	877	703	999	1253	2343	2240	4770	1374	2608	2148	2492	2006	3030	851	1307	980	2363	2353	2184	3481	2522	2779	2455	1445	5216	6795	6533	5286	3763	677	735	629	391	430	387	671	442	648	471	430	546	1178	897	472	687	757	654	452
ENSG00000089335	10	3	0	9	0	2	11	0	21	3	16	19	1	30	3	0	0	1	0	25	23	3	0	5	5	0	1	0	6	4	1	1	2	0	1	1	0	0	0	0	2	4	5	4	0	5	8	10	2
ENSG00000089351	15	5	2	2	18	28	21	47	6	25	31	30	28	35	19	1	17	30	67	19	61	25	86	75	24	135	34	62	11	47	9	18	8	13	6	10	4	8	9	3	5	11	16	13	6	11	15	19	7
ENSG00000089356	3	4	3	13	0	17	7	1	32	9	4	8	10	20	2	2	19	7	9	0	18	0	6	19	9	16	88	14	23	3	12	5	0	4	6	3	5	1	15	1	4	1	2	8	1	1	3	0	3
ENSG00000089472	0	13	0	0	0	0	0	0	0	0	0	0	0	0	0	33	0	0	0	29	0	0	0	0	0	0	0	9	0	0	7	0	0	1	0	1	0	3	1	0	0	0	0	0	0	0	0	0	0
ENSG00000089486	10	44	82	19	18	57	71	96	44	216	123	200	207	170	59	55	126	55	128	129	214	195	106	188	85	178	222	302	226	129	37	22	26	37	24	15	43	24	72	12	60	44	88	109	55	54	27	41	44
ENSG00000089505	0	0	3	0	0	0	0	0	0	0	0	0	1	0	0	0	0	1	1	0	0	0	0	0	0	0	0	0	0	3	0	0	0	0	0	0	0	0	0	0	1	0	0	0	0	2	1	0	0
ENSG00000089558	0	0	0	0	0	0	0	0	0	0	0	0	0	0	0	0	0	0	0	0	0	0	0	0	0	0	0	0	0	0	0	0	0	0	0	0	0	0	0	0	0	0	0	0	0	0	0	5	0
ENSG00000089597	5	49	19	3	2	13	24	7	1	30	76	133	48	342	46	38	15	104	36	370	205	6	0	0	2	39	21	18	8	34	6	9	16	14	10	12	10	15	18	12	19	18	77	13	4	19	74	67	19
ENSG00000089639	6	2	0	12	5	19	13	3	4	4	10	18	3	24	3	7	8	0	44	11	12	24	5	11	10	26	8	15	38	26	3	4	5	6	3	4	3	0	8	3	3	2	24	11	2	7	16	21	7
ENSG00000089682	16	26	14	12	13	6	19	3	20	87	37	109	61	44	4	32	35	108	21	76	54	36	70	56	16	31	84	53	58	30	21	20	16	14	18	25	10	6	6	3	20	9	24	24	6	25	21	16	5
ENSG00000089685	0	1	0	0	0	0	0	0	0	0	0	0	0	0	0	0	0	0	0	0	0	0	0	0	0	0	0	0	0	0	0	0	0	0	0	0	0	0	0	0	0	0	0	0	0	0	0	0	0
ENSG00000089692	2	0	0	0	0	2	1	2	19	0	1	3	0	0	1	4	0	7	0	3	5	0	0	0	0	0	0	0	0	15	0	0	5	1	0	0	1	3	0	0	0	0	1	13	0	1	10	8	2
ENSG00000089693	80	10	23	27	34	90	120	2	56	0	17	47	14	55	7	16	15	11	36	112	72	23	16	52	23	87	92	111	39	99	1	19	8	14	3	1	0	6	9	7	6	0	29	16	5	15	31	32	6
ENSG00000089723	1	0	0	0	0	0	0	0	0	0	0	0	0	0	0	0	0	0	0	4	0	0	0	0	0	0	0	0	0	0	0	0	0	0	0	0	0	4	0	0	0	0	0	0	0	0	0	0	0
ENSG00000089737	60	24	47	26	26	22	39	23	10	42	135	329	45	396	30	15	55	202	120	435	401	9	21	11	13	93	68	80	22	109	42	44	44	50	18	20	32	15	45	17	20	21	105	44	18	53	95	123	20
ENSG00000089775	1	7	0	1	2	10	5	0	14	1	13	28	0	40	8	3	1	5	2	32	5	0	0	10	0	1	1	5	1	0	1	1	4	1	0	2	1	0	3	6	0	5	14	1	2	7	9	3	3
ENSG00000089818	7	17	0	4	7	1	8	2	13	0	18	46	0	32	1	0	1	6	6	104	64	0	0	0	3	31	0	1	2	13	15	0	0	0	0	2	0	1	4	1	2	5	16	0	6	2	13	17	14
ENSG00000089820	17	0	4	7	6	33	38	4	32	0	7	27	1	3	11	0	0	15	11	55	4	23	0	0	1	17	39	58	30	114	0	11	8	4	0	1	4	2	1	6	9	5	12	13	3	7	21	14	6
ENSG00000089847	0	0	0	0	0	0	0	0	0	0	0	0	0	0	0	0	0	0	0	0	0	0	0	0	0	0	0	0	0	0	0	0	0	0	0	0	0	0	0	0	0	0	0	0	0	0	0	0	0
ENSG00000089876	5	0	3	6	0	0	0	0	2	0	7	21	18	0	0	5	0	4	0	11	9	0	0	0	0	0	0	0	0	0	1	0	3	4	0	4	0	0	1	1	6	2	0	0	1	1	0	0	4
ENSG00000089902	29	11	36	6	11	30	9	1	0	25	18	3	6	16	5	5	10	7	3	22	10	2	14	19	8	1	10	1	14	10	3	11	14	5	8	12	1	5	4	8	5	10	10	9	9	7	16	1	9
ENSG00000089916	5	21	0	3	0	7	10	25	1	6	37	36	24	57	33	14	6	50	20	62	26	0	0	2	13	23	0	7	0	24	8	11	6	3	3	6	26	5	7	0	3	1	13	15	0	13	7	26	9
ENSG00000090006	1	0	1	1	2	6	0	0	2	1	1	0	1	6	1	0	1	3	2	8	3	0	1	0	0	2	0	0	0	0	0	0	4	0	0	0	0	1	1	2	0	1	1	0	0	2	2	9	0
ENSG00000090013	94	34	17	29	36	147	189	27	57	21	71	94	15	80	13	5	12	62	93	129	404	30	17	23	1	110	103	58	53	144	25	13	11	15	9	12	8	5	9	20	9	11	39	15	4	9	68	45	41
ENSG00000090020	4	8	5	0	6	14	13	7	7	55	27	38	16	21	7	22	20	3	31	39	23	5	7	4	11	2	7	21	14	16	15	4	3	5	1	8	5	1	15	4	9	6	9	23	5	7	8	6	10
ENSG00000090054	47	15	3	16	7	4	11	2	26	42	83	365	23	322	4	1	26	39	33	376	353	46	4	8	7	15	60	18	57	131	30	10	11	9	1	1	12	1	8	15	6	5	85	11	5	7	66	74	3
ENSG00000090060	229	65	62	107	73	218	162	23	214	231	253	304	225	312	10	98	99	196	272	753	420	119	156	101	197	48	110	49	313	308	112	92	55	57	19	50	22	20	30	52	59	22	152	59	34	51	132	97	65
ENSG00000090061	78	15	36	40	28	50	48	20	80	21	62	51	48	52	28	15	7	53	24	45	62	16	9	55	7	64	60	4	2	20	19	8	19	20	1	11	30	15	8	4	16	22	41	33	17	25	30	18	21
ENSG00000090097	4	0	0	0	0	0	1	1	0	0	2	0	4	2	0	0	0	0	0	5	0	0	0	0	0	0	0	0	0	1	0	0	0	1	0	0	0	0	0	0	0	0	4	0	0	0	3	4	0
ENSG00000090104	24	0	0	1	2	11	3	4	0	0	0	7	0	7	2	1	0	0	11	6	2	0	0	0	1	0	0	1	0	0	12	2	0	2	0	0	5	0	0	0	0	1	0	0	0	0	1	0	0
ENSG00000090238	22	2	18	9	12	21	27	2	19	16	11	21	7	35	4	2	4	22	0	24	13	10	14	6	7	21	16	47	2	19	2	7	9	6	2	8	5	7	5	8	4	15	15	4	10	15	10	12	11
ENSG00000090263	25	7	0	7	6	22	8	16	77	6	33	49	4	52	2	5	4	43	11	36	89	4	0	2	14	7	7	2	2	74	3	3	8	5	0	4	4	5	1	2	5	11	16	15	4	11	32	36	1
ENSG00000090266	359	83	39	98	98	219	178	147	314	23	212	361	41	260	24	32	35	204	100	249	286	30	28	116	31	229	57	81	60	193	62	58	97	35	9	45	57	40	35	38	30	40	180	68	30	55	195	144	28
ENSG00000090273	168	26	29	34	57	183	124	91	149	44	73	106	41	125	33	18	30	61	74	198	84	84	51	121	79	150	28	21	191	214	23	26	25	27	19	21	21	4	13	8	25	4	62	10	19	13	58	55	18
ENSG00000090316	7	15	3	2	3	14	11	7	3	15	59	106	14	140	26	8	11	33	20	158	144	3	65	0	15	39	56	47	56	77	10	2	12	4	5	7	1	4	1	2	0	1	34	7	3	9	27	21	0
ENSG00000090339	4	2	5	0	2	7	1	0	0	0	4	14	0	9	1	3	0	1	0	18	40	12	0	0	0	0	0	0	0	18	1	0	0	1	0	0	0	1	0	2	0	0	5	1	0	3	5	0	2
ENSG00000090372	43	22	20	73	59	126	259	129	30	161	87	80	109	126	41	99	114	125	173	96	72	185	176	285	151	259	591	628	552	345	24	27	15	44	22	23	32	13	76	19	30	48	84	110	15	35	8	37	40
ENSG00000090376	78	12	25	33	31	55	63	82	11	109	47	62	75	73	25	19	30	39	112	83	110	48	56	98	46	57	80	39	22	53	16	35	19	35	39	23	27	12	37	14	40	17	39	35	3	17	19	35	29
ENSG00000090382	5014	1421	299	798	1082	2759	1739	139	987	79	318	709	14	701	16	14	53	90	88	9575	2288	36	77	20	33	659	214	279	53	446	201	20	7	23	69	5	11	6	7	50	134	23	184	41	12	20	396	478	31
ENSG00000090402	0	0	0	0	0	0	0	0	0	0	0	0	0	0	0	0	0	0	0	0	0	0	0	0	0	0	0	0	0	0	0	0	0	0	0	0	0	0	0	0	0	0	0	0	0	0	0	0	0
ENSG00000090432	1	0	0	0	0	1	7	0	10	0	5	14	0	11	2	1	0	11	0	21	36	0	0	0	0	0	5	0	0	17	2	1	1	0	0	0	1	0	1	3	0	1	6	2	0	0	2	6	2
ENSG00000090447	0	0	1	0	0	0	0	0	0	0	2	0	0	0	1	0	0	0	7	6	0	0	0	0	0	0	0	2	0	1	0	1	0	0	0	0	0	0	0	0	0	0	2	1	0	1	0	0	0
ENSG00000090470	2	5	0	0	0	1	6	1	2	0	5	13	7	17	0	0	1	8	15	12	4	0	0	0	0	19	0	0	0	0	1	0	1	5	2	4	4	3	3	1	1	3	14	5	1	1	6	2	2
ENSG00000090487	74	12	9	6	14	39	96	12	100	30	10	46	3	63	6	8	2	32	49	157	81	13	0	1	5	120	0	1	44	86	7	9	15	3	8	2	14	3	9	10	9	5	32	9	2	15	50	46	18
ENSG00000090512	0	0	0	0	0	0	0	0	0	0	0	0	0	0	0	0	0	0	0	0	0	0	0	0	0	0	0	0	0	0	0	0	0	0	0	0	0	0	0	0	0	0	0	0	0	0	0	0	0
ENSG00000090520	98	7	11	17	17	38	41	12	126	12	62	119	13	73	2	12	23	32	68	126	125	14	0	0	0	238	7	1	22	122	13	3	30	7	0	9	6	15	16	8	4	2	41	19	12	11	69	65	18
ENSG00000090530	0	0	0	0	0	0	0	0	5	13	0	0	0	0	0	0	0	0	3	0	0	0	0	0	0	0	0	0	0	0	0	0	0	0	0	0	1	0	0	1	0	0	0	0	0	2	0	5	1
ENSG00000090534	0	0	0	3	0	0	0	0	0	0	0	0	0	0	0	0	0	0	0	0	0	0	0	0	0	0	0	0	0	0	0	0	0	0	0	0	0	0	0	0	0	0	0	0	0	0	0	0	0
ENSG00000090539	0	0	0	0	0	0	0	0	0	0	0	0	0	0	0	0	0	0	0	0	0	0	0	0	0	0	0	0	0	0	0	0	0	0	0	0	0	0	0	0	0	0	0	0	0	0	0	1	0
ENSG00000090554	0	0	0	0	1	0	0	0	0	0	0	0	0	1	2	0	1	0	0	0	0	0	0	0	0	0	0	0	0	3	0	0	0	0	0	0	0	0	0	0	0	0	1	1	0	0	1	0	0
ENSG00000090565	3	1	0	1	6	15	8	7	1	12	9	1	4	2	6	8	2	11	1	9	1	0	0	1	8	3	20	19	16	10	2	2	10	0	2	0	3	3	2	4	7	8	7	4	5	1	0	2	4
ENSG00000090581	52	32	49	18	11	131	180	27	68	92	62	158	56	156	17	10	46	52	58	146	188	0	87	13	26	89	42	229	86	121	36	6	18	16	10	9	18	5	20	7	8	14	57	19	15	25	63	86	12
ENSG00000090612	0	0	0	1	0	0	0	0	0	0	0	0	0	0	0	0	0	3	0	1	0	0	0	0	0	0	0	0	0	0	0	0	0	0	0	0	0	0	0	0	0	0	0	0	0	0	0	0	0
ENSG00000090615	9	2	3	5	5	1	15	0	34	3	9	21	11	13	0	1	6	29	42	47	35	0	0	0	0	23	16	3	7	1	14	9	6	3	3	10	5	8	4	4	18	5	10	9	5	10	11	16	11
ENSG00000090621	63	39	24	14	18	52	40	12	50	3	130	129	22	156	5	4	16	315	112	125	125	11	0	0	0	3	2	0	0	9	14	54	40	17	4	18	2	10	17	15	20	21	47	13	19	24	69	36	17
ENSG00000090659	0	3	0	0	0	0	0	0	0	0	0	0	0	0	0	0	0	0	0	0	9	0	0	0	0	0	0	0	0	0	0	0	0	0	0	0	0	0	0	0	0	0	0	0	0	0	0	0	0
ENSG00000090661	6	3	0	0	0	1	12	2	1	2	0	3	2	9	0	6	5	0	12	13	3	0	0	0	3	0	30	0	5	1	0	3	1	2	0	0	1	4	0	3	2	5	0	1	0	0	6	8	0
ENSG00000090674	3	0	1	6	0	15	6	0	2	0	4	6	0	21	0	10	2	2	0	26	33	0	0	16	0	31	0	0	26	24	3	1	2	0	7	4	0	0	0	3	2	1	7	0	4	0	6	9	3
ENSG00000090686	178	32	50	83	46	31	86	106	39	100	125	190	53	111	104	67	58	151	57	277	213	53	76	115	85	26	69	54	84	191	41	75	70	25	25	60	37	34	51	65	33	92	96	31	28	46	87	63	59
ENSG00000090776	2	6	0	0	3	3	4	0	0	21	12	3	11	13	2	0	8	15	4	1	17	3	6	2	5	2	22	5	15	11	5	1	4	6	0	1	0	2	0	0	0	0	3	4	3	2	1	1	4
ENSG00000090857	0	0	0	2	0	0	2	0	38	0	0	4	1	16	0	2	0	0	0	33	34	0	0	0	0	0	0	3	0	1	2	0	1	0	3	0	1	0	1	0	0	1	4	1	0	1	3	5	1
ENSG00000090861	13	4	50	1	4	1	9	0	13	5	94	187	17	192	6	26	18	51	51	426	284	0	0	0	25	1	0	16	32	69	37	10	19	4	8	8	14	4	10	6	23	3	72	18	3	6	69	35	10
ENSG00000090863	111	27	37	89	34	70	101	56	126	64	156	242	65	228	27	13	56	376	199	489	329	0	2	1	1	59	21	76	25	87	63	43	85	28	14	34	86	13	24	23	42	31	141	42	29	55	94	126	21
ENSG00000090889	5	0	2	0	3	7	1	1	80	0	10	0	16	13	0	15	2	0	0	0	15	0	0	0	0	0	0	0	0	22	0	5	0	0	0	0	0	5	0	2	2	0	0	6	0	0	9	0	1
ENSG00000090905	14	12	22	13	15	30	16	36	63	53	40	78	50	131	40	43	28	109	52	146	102	42	35	41	1	18	31	3	12	52	16	30	47	24	11	26	20	20	24	24	36	28	54	67	22	17	20	43	20
ENSG00000090920	0	0	0	0	0	0	0	0	0	0	12	2	0	7	0	0	1	21	6	1	1	0	0	0	0	0	0	0	0	0	0	6	2	1	0	9	0	1	2	3	0	6	6	1	0	12	1	1	2
ENSG00000090924	0	0	0	1	0	0	5	0	0	0	0	1	0	0	0	0	0	4	0	0	0	0	0	0	0	3	0	0	0	0	1	0	0	0	0	0	0	0	0	0	0	0	1	0	2	0	0	1	0
ENSG00000090932	0	0	0	0	0	0	0	0	0	0	0	1	0	0	0	0	0	0	0	0	0	0	0	0	0	0	0	0	0	0	0	0	0	0	0	0	0	0	0	0	0	0	2	0	0	0	1	0	0
ENSG00000090971	0	0	0	0	0	0	0	0	0	0	0	0	0	0	0	0	0	0	0	0	0	0	0	0	0	1	0	0	0	0	0	0	0	0	0	0	0	0	0	0	0	0	0	0	0	0	0	0	0
ENSG00000090975	26	9	21	22	19	32	81	58	10	95	33	34	77	29	16	20	28	18	85	27	37	60	47	55	32	59	46	32	51	80	17	24	8	9	12	5	4	5	19	8	2	17	22	30	19	13	3	13	8
ENSG00000090989	37	34	21	7	8	11	10	58	23	64	72	145	18	305	13	1	42	84	6	270	232	0	28	5	25	23	1	56	1	30	3	12	35	12	10	22	14	21	5	31	4	16	40	14	8	13	47	64	13
ENSG00000091009	146	9	53	37	48	64	74	22	33	44	105	124	49	106	26	1	27	145	61	246	184	9	1	26	18	69	68	44	11	93	18	24	45	8	28	30	13	10	12	21	10	38	52	26	8	65	82	46	27
ENSG00000091010	0	0	0	0	0	0	0	0	0	0	0	0	0	0	0	0	0	0	0	0	0	0	0	0	0	0	0	0	0	0	0	0	0	0	0	0	0	0	0	0	0	0	0	0	0	0	0	0	0
ENSG00000091039	494	167	243	354	118	503	352	167	308	724	659	552	579	893	175	345	333	302	471	1009	578	275	294	186	123	377	468	603	428	322	182	114	160	150	73	69	71	58	123	44	142	136	241	190	94	117	216	110	150
ENSG00000091073	11	0	2	2	0	2	10	0	9	0	16	3	0	18	1	1	3	4	20	40	20	0	16	0	0	17	0	0	11	16	2	3	0	0	0	0	0	0	0	1	0	3	8	3	1	0	16	3	3
ENSG00000091106	16	2	1	11	0	18	1	0	14	0	2	42	11	21	1	0	4	0	1	100	103	5	1	1	11	0	48	0	0	3	0	1	2	1	2	3	9	2	0	2	2	3	12	7	2	4	24	32	5
ENSG00000091127	14	6	3	10	9	0	7	2	0	2	37	34	0	20	0	0	0	9	7	25	26	0	1	0	11	0	0	1	1	5	0	0	1	1	13	0	2	0	2	1	0	0	10	3	0	1	11	6	5
ENSG00000091128	0	0	0	0	0	0	0	0	0	0	0	0	0	0	0	0	0	0	0	0	0	0	0	0	0	0	0	0	0	0	0	0	0	0	0	0	0	0	0	0	1	0	0	0	0	0	0	0	0
ENSG00000091129	0	0	0	0	0	0	0	0	0	0	0	5	14	0	2	0	2	1	0	0	41	0	0	0	0	0	0	0	0	0	0	4	12	1	0	0	0	0	1	0	0	0	0	0	2	0	1	0	0
ENSG00000091136	0	0	2	0	0	0	0	0	0	0	0	1	0	0	1	0	0	4	0	1	0	0	0	0	0	0	0	0	0	0	0	0	0	0	0	0	0	0	0	0	0	0	0	0	0	0	0	0	0
ENSG00000091137	0	0	0	0	0	0	6	0	0	0	9	0	0	7	0	0	0	26	0	0	0	0	0	0	0	0	0	0	0	0	0	0	0	0	0	0	0	0	0	0	0	0	0	0	0	0	0	4	0
ENSG00000091138	0	0	0	0	0	0	0	0	38	0	0	0	0	0	0	0	0	0	0	0	0	0	0	0	0	0	0	0	0	0	0	0	1	0	0	0	0	0	0	0	0	0	0	0	0	0	1	0	0
ENSG00000091140	31	51	25	17	4	3	30	19	75	124	141	642	72	453	7	44	26	136	36	711	976	122	51	30	40	60	1	0	73	96	48	20	16	16	0	21	9	5	3	10	21	14	81	44	2	51	81	122	24
ENSG00000091157	13	7	24	8	2	2	11	3	2	18	32	156	50	135	6	12	41	109	8	225	152	35	0	0	1	0	78	1	11	1	27	8	9	13	0	5	5	5	5	7	9	8	36	7	9	14	25	26	8
ENSG00000091164	415	90	105	84	120	308	254	414	996	461	371	550	482	516	71	114	190	482	246	425	530	409	580	232	64	412	763	176	710	811	67	59	61	57	57	29	80	37	87	31	82	50	120	95	42	99	170	128	53
ENSG00000091181	3	0	0	0	0	0	0	0	0	0	0	15	1	0	0	0	0	2	0	10	8	0	0	0	0	78	0	0	0	0	0	0	0	0	0	0	0	0	0	0	0	0	2	0	0	1	0	0	0
ENSG00000091262	1	2	1	0	0	0	0	2	0	0	0	0	0	0	1	0	0	0	0	5	10	0	0	0	0	0	0	0	0	0	0	0	0	0	0	0	1	0	0	4	0	0	0	0	0	0	1	0	0
ENSG00000091317	58	91	139	137	60	136	94	76	147	1005	434	362	411	310	204	253	266	360	299	460	365	428	680	481	258	496	1458	1641	1459	711	200	76	86	85	55	82	91	48	203	23	167	60	248	156	61	72	128	98	98
ENSG00000091409	8	28	12	76	6	22	43	53	45	128	108	155	94	213	62	62	29	68	71	251	154	4	65	10	2	10	115	161	65	110	42	5	36	12	8	26	25	7	43	12	12	30	35	37	7	36	20	41	8
ENSG00000091428	0	0	0	3	0	1	0	0	0	0	0	0	0	0	0	0	0	0	0	0	0	0	0	0	0	0	0	0	0	0	0	0	0	0	0	0	0	0	0	0	0	0	0	0	0	2	0	0	0
ENSG00000091436	12	0	6	20	1	12	12	0	0	0	5	10	0	0	2	9	1	0	0	49	28	0	0	1	0	0	4	0	5	7	0	3	0	0	2	1	0	0	3	1	4	0	4	4	0	0	9	2	1
ENSG00000091482	0	0	0	0	0	0	0	0	0	0	0	0	0	0	0	0	0	0	0	0	0	0	0	0	0	0	0	0	0	0	0	0	0	0	0	0	0	0	0	0	0	0	0	0	0	0	0	0	0
ENSG00000091483	44	49	0	10	3	12	17	33	82	2	59	91	1	110	8	0	41	70	37	164	147	0	0	0	10	69	0	1	13	105	29	8	20	9	4	3	11	3	8	2	14	3	29	8	4	9	27	36	1
ENSG00000091490	19	21	29	8	5	16	40	32	50	46	50	120	41	120	8	35	27	75	49	143	120	0	0	0	1	49	17	1	8	2	43	6	12	9	6	2	10	21	8	23	12	25	47	17	11	15	28	28	14
ENSG00000091513	0	0	1	0	0	0	0	0	0	0	6	0	0	0	0	0	0	0	0	0	0	0	0	0	0	0	0	0	0	0	0	0	0	0	0	0	5	0	5	2	0	0	0	1	0	2	0	0	0
ENSG00000091527	3	1	12	2	6	7	10	5	15	11	19	17	8	13	5	4	5	30	9	25	19	0	20	0	0	1	1	1	4	11	5	7	12	5	1	4	0	6	5	1	0	3	10	3	3	5	6	14	2
ENSG00000091536	0	0	0	1	0	0	1	13	0	0	0	0	0	8	0	0	1	23	0	0	5	0	0	0	0	0	0	0	0	0	0	0	0	0	1	0	1	0	0	1	0	0	1	0	0	0	0	0	0
ENSG00000091542	2	1	1	6	1	4	6	3	0	14	16	12	1	10	7	3	1	12	2	7	14	0	0	0	0	0	7	0	2	9	5	4	1	1	0	0	1	1	3	2	8	4	3	4	0	1	5	4	1
ENSG00000091583	0	0	0	0	0	0	0	0	0	0	0	0	0	0	0	0	0	0	0	0	0	0	0	0	0	0	0	0	0	0	0	0	0	0	0	0	0	0	0	0	0	0	0	0	0	0	0	0	0
ENSG00000091592	49	58	52	33	3	29	20	42	43	15	84	150	19	253	44	27	27	194	135	588	538	0	0	0	6	5	18	12	27	15	48	22	49	14	13	31	34	10	20	47	23	41	66	19	34	43	88	41	36
ENSG00000091622	0	0	0	0	0	0	0	0	0	0	0	0	0	0	0	0	0	0	0	0	0	0	0	0	0	0	0	0	0	0	0	0	0	0	0	1	0	2	0	0	0	0	0	0	0	0	0	0	0
ENSG00000091640	242	39	48	62	80	102	235	95	244	39	123	215	36	261	28	16	44	151	83	379	376	49	69	62	29	50	161	112	59	234	50	27	34	32	21	20	23	11	29	17	13	27	122	20	16	55	88	111	10
ENSG00000091651	11	0	0	0	0	0	0	60	0	0	0	3	0	0	0	0	0	0	0	5	3	0	0	0	0	0	28	0	0	0	0	0	0	0	1	0	0	0	0	0	0	0	3	2	0	4	3	1	0
ENSG00000091656	0	0	0	0	0	0	0	0	0	0	0	0	0	0	3	0	0	0	0	0	0	0	0	0	0	0	0	0	0	0	0	0	0	0	0	0	0	0	0	0	0	0	0	0	0	0	0	0	0
ENSG00000091664	0	0	0	0	0	0	0	0	0	0	0	0	0	0	0	0	0	0	0	0	0	0	0	0	0	0	0	0	0	0	0	0	0	0	0	0	0	0	0	0	0	0	0	0	0	0	0	0	0
ENSG00000091704	0	0	0	0	0	0	0	0	0	0	0	0	0	0	0	0	0	0	0	0	0	0	0	0	0	0	0	0	0	0	0	0	0	0	0	0	0	0	0	0	0	0	0	0	0	0	0	0	0
ENSG00000091732	12	0	0	3	5	13	11	2	21	5	28	72	13	80	1	5	1	27	16	59	96	40	0	13	0	59	0	30	23	24	0	6	2	2	1	3	6	4	6	1	0	6	23	3	2	2	10	10	6
ENSG00000091831	0	0	0	0	0	0	0	0	0	0	0	0	0	0	0	0	4	1	0	0	1	0	0	0	0	1	0	0	0	0	0	0	0	0	0	0	0	0	0	0	0	0	0	0	0	0	1	0	0
ENSG00000091844	0	0	0	0	0	0	0	5	0	0	1	0	2	0	0	4	2	9	0	0	0	0	0	0	0	0	0	0	0	10	0	0	0	0	0	1	0	0	0	0	0	0	0	3	0	0	1	0	0
ENSG00000091879	0	0	0	0	0	0	0	0	0	0	0	0	0	0	0	0	1	0	0	2	0	0	0	0	0	0	0	0	0	0	0	0	0	0	0	0	0	1	0	0	2	0	0	0	0	0	0	0	0
ENSG00000091947	7	3	2	2	3	10	3	0	1	1	13	24	1	24	2	1	1	4	3	30	46	0	0	0	0	6	8	2	0	31	11	0	0	3	0	0	0	0	1	6	2	1	10	3	0	0	21	9	0
ENSG00000091972	5	1	0	0	0	0	21	0	0	0	1	22	1	17	2	3	0	1	31	26	13	5	0	0	0	0	14	30	0	9	2	1	1	1	5	3	0	0	1	0	2	2	12	0	0	2	3	8	0
ENSG00000091986	0	0	0	0	0	2	0	0	0	0	0	1	0	6	0	0	1	8	6	0	0	0	0	0	0	22	0	0	7	0	5	0	0	0	0	1	0	0	0	0	0	0	0	0	0	0	0	0	2
ENSG00000092009	0	0	0	0	0	0	3	0	0	5	0	0	0	0	0	0	0	0	0	0	7	0	0	0	0	0	0	0	9	0	0	0	0	0	0	0	0	5	0	0	0	0	0	0	0	0	0	0	0
ENSG00000092010	1405	348	268	480	262	1078	965	663	1456	298	660	1863	213	1403	77	140	171	789	582	2113	2747	270	492	420	452	1328	986	594	409	1610	296	145	253	182	140	82	157	106	98	100	117	120	629	197	68	250	884	775	85
ENSG00000092020	286	60	64	92	151	130	291	359	139	328	238	244	131	477	17	84	101	313	226	334	482	252	285	66	69	346	431	302	213	271	33	33	58	57	57	19	43	22	47	26	72	26	107	56	31	47	153	115	22
ENSG00000092036	38	7	0	10	20	46	37	2	23	7	25	39	9	55	4	6	3	10	16	92	64	0	21	5	12	18	38	0	21	60	6	0	2	4	12	3	1	0	3	3	5	0	3	5	2	3	17	13	0
ENSG00000092051	0	0	0	0	0	0	0	0	0	0	0	0	0	0	0	0	0	0	0	0	0	0	0	0	0	0	0	0	0	0	0	0	0	0	0	0	0	0	0	0	0	0	0	0	0	0	0	0	0
ENSG00000092054	0	0	0	0	0	0	0	0	0	0	0	0	0	0	0	0	0	0	0	0	0	0	0	0	0	0	0	0	0	0	0	0	1	0	0	0	0	0	0	0	0	0	0	0	0	0	0	0	1
ENSG00000092067	0	1	0	0	0	0	0	0	0	0	0	1	0	0	0	0	0	0	0	0	2	0	0	0	0	0	0	0	0	5	0	0	1	0	0	0	0	0	0	0	0	0	1	0	1	1	0	0	0
ENSG00000092068	0	0	0	1	0	0	0	0	0	0	0	19	0	15	0	0	3	0	0	32	4	0	0	0	0	0	0	0	0	0	0	0	0	0	0	0	0	0	0	0	0	0	0	0	1	0	0	0	0
ENSG00000092094	102	43	77	55	53	99	99	51	226	91	32	215	39	135	49	20	55	150	139	204	280	69	1	61	0	81	295	330	142	489	37	39	23	19	3	30	41	14	39	24	32	19	97	52	8	25	63	83	21
ENSG00000092096	0	0	0	0	0	2	0	1	0	4	3	1	5	4	1	0	0	0	7	0	0	0	0	0	13	0	0	20	8	0	2	3	0	3	0	0	2	0	0	0	0	0	4	1	0	5	3	1	0
ENSG00000092098	0	2	0	0	1	3	0	0	0	0	3	6	0	9	1	3	1	6	1	12	5	0	3	0	0	24	1	0	0	0	3	0	1	3	0	0	0	0	0	3	0	0	4	4	0	1	2	5	0
ENSG00000092108	174	126	76	150	82	75	89	324	156	276	382	707	212	594	79	91	196	473	156	468	765	142	87	520	221	391	405	302	337	339	78	102	60	45	46	95	41	25	40	40	26	65	198	102	27	113	169	167	91
ENSG00000092140	27	5	30	9	31	12	31	40	20	5	15	147	6	114	2	20	17	80	28	113	89	1	7	0	0	0	110	32	18	20	20	15	3	8	34	5	17	13	3	8	26	4	42	16	1	20	30	23	5
ENSG00000092148	89	12	14	47	28	32	43	56	33	48	142	121	120	183	9	21	40	86	107	341	142	0	8	0	9	19	106	2	48	21	52	33	54	7	17	47	29	16	34	31	20	26	75	30	22	29	64	65	37
ENSG00000092199	647	331	273	314	289	421	631	459	731	662	1214	1410	796	1783	188	331	391	1183	657	1840	2148	529	462	460	314	1068	918	860	581	1289	257	129	211	161	102	145	160	119	148	91	174	139	501	263	105	204	445	456	118
ENSG00000092200	4	5	19	6	0	0	0	0	5	0	0	5	0	5	0	0	0	14	0	0	15	0	0	0	0	21	0	0	0	0	7	3	0	0	4	0	1	0	0	5	5	0	4	0	0	1	9	1	17
ENSG00000092201	272	87	73	89	30	72	89	152	232	132	326	610	129	580	46	52	90	199	218	1086	763	0	26	6	27	227	199	9	59	208	45	48	81	25	29	50	35	71	55	21	39	36	214	61	21	59	164	193	29
ENSG00000092203	34	26	23	39	20	16	57	19	6	93	93	124	80	98	28	12	36	49	62	164	193	86	32	56	20	89	93	124	99	109	15	17	32	7	15	21	11	4	32	21	33	33	31	35	12	27	73	31	25
ENSG00000092208	7	0	0	9	1	0	4	0	3	0	22	32	19	55	10	1	0	0	0	12	62	0	0	0	0	48	0	0	0	35	5	9	15	0	4	4	11	0	5	1	2	1	6	0	2	12	13	12	2
ENSG00000092295	0	3	0	0	0	0	1	0	0	0	0	0	0	2	2	0	0	6	9	1	11	0	0	0	0	12	0	0	0	0	1	0	1	0	0	2	2	2	0	0	0	0	0	0	0	3	0	0	1
ENSG00000092330	60	19	27	24	16	32	69	10	75	40	33	63	34	122	10	18	15	30	12	175	125	61	40	17	34	88	69	99	106	157	13	5	16	13	2	9	7	7	7	3	9	6	45	10	7	9	39	34	7
ENSG00000092345	0	0	0	0	0	0	0	0	0	0	0	0	0	5	0	0	0	0	0	0	0	0	0	0	0	0	0	0	0	0	0	0	0	0	0	0	0	0	0	0	0	0	0	0	0	0	0	0	0
ENSG00000092377	0	0	0	0	0	0	0	0	0	0	0	0	0	0	0	0	0	0	0	0	0	0	0	0	0	0	0	0	0	0	0	0	0	0	0	0	0	0	0	0	0	0	0	0	0	0	0	0	0
ENSG00000092421	0	0	0	0	0	0	1	0	0	0	0	0	0	1	0	1	0	0	0	0	0	0	0	0	0	0	0	0	0	0	0	0	0	1	0	0	0	0	0	0	0	2	0	0	0	0	1	1	0
ENSG00000092439	47	46	54	25	16	8	12	22	60	15	137	312	34	248	23	44	25	62	74	496	216	26	0	51	1	24	33	30	45	35	33	34	8	14	0	30	12	0	15	17	5	17	70	8	4	20	52	19	28
ENSG00000092445	0	0	0	0	0	1	0	0	0	0	0	0	0	0	0	0	0	0	0	1	0	0	0	0	0	0	0	0	0	0	0	0	6	0	0	4	0	0	0	0	0	0	1	0	0	0	0	0	1
ENSG00000092470	4	1	0	13	3	4	6	2	2	0	8	9	9	17	15	0	11	8	1	2	0	0	0	0	0	16	0	0	0	0	1	0	0	0	2	0	0	0	0	0	0	3	0	0	0	2	12	2	2
ENSG00000092529	0	0	0	0	0	0	0	0	0	0	0	0	0	0	0	0	0	0	0	0	0	0	0	0	0	0	0	0	0	0	0	0	0	0	0	0	0	0	0	0	0	0	0	0	0	0	0	0	0
ENSG00000092531	163	639	1423	181	336	313	349	474	372	5972	4254	3704	4560	3910	1087	2290	2618	2658	2500	3018	4193	2726	1917	2037	1634	2065	3812	3980	3439	2350	1036	505	618	384	429	376	795	282	1061	188	1028	336	1261	1321	532	855	411	664	528
ENSG00000092607	0	0	0	0	0	0	0	0	0	0	0	0	0	0	0	0	0	0	0	0	0	0	0	0	0	0	0	0	0	0	0	0	0	0	0	0	0	0	0	0	0	0	0	0	0	2	0	0	0
ENSG00000092621	21	47	34	7	0	68	97	487	91	131	133	67	20	54	12	29	21	131	139	23	126	147	0	94	43	183	71	200	21	60	11	23	1	6	24	8	1	5	0	1	4	6	34	40	11	21	11	12	4
ENSG00000092758	0	0	0	0	0	0	0	0	0	0	0	0	0	0	0	0	0	0	0	1	0	0	0	0	0	0	0	0	0	0	0	0	0	0	0	0	0	0	0	0	0	0	0	0	0	0	0	0	0
ENSG00000092820	261	174	152	185	55	140	169	93	224	71	415	879	118	855	26	35	61	95	165	1592	1213	140	3	126	15	203	71	168	76	436	139	39	89	52	43	38	38	58	27	38	56	62	408	78	9	98	302	332	45
[truncated: 55,738 more rows]
[truncated: 6 more columns]
