# Supplementary material for: RNA Sequencing of Tumor-Educated Platelets Reveals a Three-Gene Diagnostic Signature in Esophageal Squamous Cell Carcinoma
Source: Front Oncol. 2022 May 9;12:824354. doi: 10.3389/fonc.2022.824354 (PMC9124963; doi:10.3389/fonc.2022.824354)
Supplement: Supplementary file 6 [file DataSheet_6.xlsx]

## Sheet: count
	VE6	VE10	VE11	VE1	TE2	TE3	VE4	VE5	VE7	VE8	VE9	VE12	VE13	VE14	TE15	TE16	VE17	TE19	TE20	VE18	VE21	VE22	VE23	VE24	VE25	VIC72	VIC73	VIC74	TIC75	TIC76	VIC77	VIC78	VIC79	VIC80	TIC81	VIC82	TIC83	VIC84	VIC85	VIC86	VIC87	VIC88	VIC89	TIC90	VIC91	TIC92	VE26	TE27	VE28
ENSG00000000003_TSPAN6	0	1	0	0	0	5	6	0	0	1	0	22	0	34	0	0	0	9	0	0	8	11	0	21	16	17	8	4	7	9	0	8	5	0	3	13	0	11	31	0	3	30	0	2	12	6	8	0	8
ENSG00000000005_TNMD	0	0	0	0	0	0	0	0	0	0	0	0	0	0	0	0	0	0	0	0	0	0	0	0	0	0	0	0	0	0	0	0	0	0	0	0	0	0	0	0	0	0	0	0	0	0	0	0	0
ENSG00000000419_DPM1	373	232	87	287	88	52	114	80	128	120	385	189	129	199	194	137	163	168	54	225	167	226	135	436	62	734	887	334	287	271	289	891	299	280	216	190	378	211	74	132	188	232	286	195	174	248	102	151	245
ENSG00000000457_SCYL3	15	25	39	98	40	26	20	23	95	25	85	52	7	20	39	76	64	42	6	13	29	31	23	61	8	250	270	91	38	82	99	122	51	43	23	44	51	41	43	8	36	13	50	21	53	29	14	30	43
ENSG00000000460_C1orf112	215	126	32	83	90	87	470	62	200	179	220	161	145	151	168	137	139	102	55	87	120	139	79	240	42	195	259	186	225	186	252	362	152	226	242	257	173	284	155	132	177	125	175	213	203	168	128	164	136
ENSG00000000938_FGR	99	336	629	255	210	31	46	73	542	71	470	51	0	95	235	573	33	18	198	41	103	25	59	1017	0	4296	4165	1319	446	1177	1040	2199	482	44	45	93	86	240	88	6	105	74	249	66	166	261	9	29	22
ENSG00000000971_CFH	0	7	7	37	37	61	133	3	61	8	4	75	0	1	0	12	29	9	0	0	3	16	0	7	0	5	41	30	0	29	17	7	26	0	17	14	6	3	0	18	3	0	44	1	1	13	1	41	6
ENSG00000001036_FUCA2	458	304	155	296	377	195	371	211	314	226	543	217	251	343	164	245	522	191	407	293	273	291	144	532	28	368	319	367	219	277	265	444	392	324	371	538	380	347	338	326	235	346	338	404	391	309	162	179	350
ENSG00000001084_GCLC	63	60	279	68	75	3	39	7	337	102	237	174	49	107	177	696	113	114	36	74	68	34	28	373	170	1151	1705	456	581	448	393	865	192	59	63	94	69	97	34	69	65	32	148	45	69	85	118	54	17
ENSG00000001167_NFYA	265	47	65	53	56	220	3	77	132	77	251	118	103	106	137	106	127	64	17	117	70	84	63	186	18	280	412	180	161	191	209	253	125	68	91	86	156	71	108	46	150	54	80	77	181	88	35	83	101
ENSG00000001460_STPG1	1	18	0	0	58	5	3	1	8	3	24	42	11	24	1	12	38	32	0	0	36	30	0	19	0	12	17	17	31	14	12	16	35	10	11	15	44	11	45	31	23	8	13	10	29	46	9	23	22
ENSG00000001461_NIPAL3	622	238	190	94	404	156	212	387	690	314	490	257	336	596	277	284	747	641	263	205	723	573	160	289	190	314	211	330	571	414	334	348	731	405	390	426	750	263	796	208	533	246	454	289	714	421	333	568	476
ENSG00000001497_LAS1L	10	46	96	1	25	35	0	15	98	0	58	0	1	37	55	22	0	2	7	6	11	5	11	86	0	402	201	35	44	84	150	268	27	14	14	11	24	21	7	20	2	26	15	2	23	21	34	10	4
ENSG00000001561_ENPP4	94	64	13	4	48	31	144	59	112	101	157	38	106	94	58	73	61	179	116	42	170	122	30	216	31	809	266	64	196	212	263	656	157	266	155	74	121	109	55	6	142	24	179	45	111	92	0	129	65
ENSG00000001617_SEMA3F	0	0	1	2	0	6	0	0	0	0	0	0	0	9	0	0	0	0	0	0	1	0	0	0	0	0	0	0	0	0	0	0	0	0	0	0	1	0	0	0	0	0	0	0	0	0	2	0	0
ENSG00000001626_CFTR	0	0	0	1	0	5	0	0	0	0	0	0	0	0	0	0	0	0	0	0	0	0	0	0	0	0	0	0	0	0	0	0	0	0	0	0	0	0	0	0	0	13	0	0	0	0	0	0	0
ENSG00000001629_ANKIB1	888	595	494	505	919	552	715	427	1991	1140	1564	925	826	1071	1095	619	1086	1143	209	522	1352	1153	464	1363	335	1742	1347	1135	1170	1090	1493	1782	1362	1591	2127	1326	955	1790	1366	407	1091	679	1443	1205	1307	1352	834	1539	1497
ENSG00000001630_CYP51A1	48	46	44	46	83	65	0	21	106	20	86	69	6	59	35	13	52	33	6	14	71	66	31	91	0	245	144	71	97	97	79	182	74	40	62	92	35	43	95	12	67	41	60	43	42	53	59	34	37
ENSG00000001631_KRIT1	788	725	294	437	752	512	475	305	1180	1203	1050	979	636	902	1288	529	958	1034	395	437	945	1001	372	1348	240	2021	1272	1091	1111	1206	1209	1845	1159	1381	1547	1302	789	2090	1066	294	928	784	1169	894	1146	1299	583	1396	1130
ENSG00000002016_RAD52	6	1	0	18	0	3	7	0	49	0	36	1	48	6	14	21	13	11	0	10	20	27	0	16	38	123	98	44	15	24	34	52	23	10	3	3	2	20	9	7	11	5	14	3	12	3	3	7	11
ENSG00000002079_MYH16	0	0	1	0	0	0	0	0	0	0	0	0	0	0	0	0	0	0	0	0	0	0	0	0	0	0	0	0	0	0	0	0	0	0	0	0	0	0	0	0	0	0	0	0	0	0	0	0	0
ENSG00000002330_BAD	147	59	111	35	97	74	108	58	126	61	139	108	111	145	90	82	144	109	131	141	121	117	127	108	130	82	92	112	159	104	94	98	103	130	127	94	150	129	152	131	123	169	106	148	157	132	53	122	81
ENSG00000002549_LAP3	285	294	415	510	429	245	260	559	838	441	1018	269	439	204	275	260	399	263	241	268	273	310	327	478	289	723	455	381	337	458	412	694	330	431	239	292	1635	292	352	336	475	363	416	224	448	239	325	259	417
ENSG00000002586_CD99	59803	57714	48030	28925	74253	59719	25675	41248	71327	48002	69662	46938	33965	43343	55172	47722	58586	45449	39421	53207	59916	31573	40337	46281	17350	27465	20463	47942	45058	43464	42292	31801	50497	64085	66123	47055	37623	52122	60175	18988	42110	33202	60482	45544	49770	53254	45125	55143	57970
ENSG00000002587_HS3ST1	0	2	1	0	0	6	0	0	0	0	2	0	0	0	0	0	0	0	0	0	0	0	0	0	0	1	5	3	0	0	0	0	0	0	0	1	0	0	0	0	0	0	0	0	0	0	0	0	0
ENSG00000002726_AOC1	0	0	0	0	0	4	0	6	0	0	0	0	2	0	0	1	0	0	0	0	0	0	0	5	0	2	8	0	0	1	0	0	0	0	0	0	0	0	0	0	0	0	0	0	0	1	0	0	0
ENSG00000002745_WNT16	0	0	0	0	0	1	6	0	5	0	0	0	0	0	0	0	0	0	0	0	0	1	0	0	0	5	1	0	0	7	7	1	0	0	0	0	0	0	0	0	0	0	1	0	0	0	4	0	0
ENSG00000002746_HECW1	0	0	0	0	0	2	0	2	0	0	0	0	0	0	0	0	0	0	0	0	0	0	0	0	0	0	0	0	0	0	0	0	0	0	0	0	0	0	0	0	0	0	0	0	0	0	0	0	0
ENSG00000002822_MAD1L1	26	11	54	0	40	14	7	8	98	58	88	36	39	68	70	45	55	88	57	24	42	46	38	106	4	322	229	63	91	109	97	190	84	52	94	80	30	77	28	31	59	95	55	46	87	48	23	41	39
ENSG00000002834_LASP1	1493	921	958	580	1588	741	942	959	2163	1058	2208	1037	1430	954	1089	1269	1477	1188	862	1378	1151	1217	1044	1244	648	2171	2066	1550	1468	1649	1488	1663	1773	1113	1331	1508	1142	1003	1495	851	879	1498	1143	1104	1230	1216	584	1106	1040
ENSG00000002919_SNX11	19	78	143	108	166	3	2	48	49	45	87	22	56	39	77	44	26	17	0	97	25	39	6	121	49	251	363	177	86	112	116	196	102	47	74	137	62	39	71	59	58	115	91	40	36	48	42	14	33
ENSG00000002933_TMEM176A	1	0	1	1	0	1	56	0	10	0	14	10	0	0	0	41	0	0	0	0	0	0	0	8	0	0	32	2	9	24	9	46	0	0	0	0	0	0	0	0	0	0	2	0	0	0	0	0	0
ENSG00000003056_M6PR	1782	1430	667	753	1289	748	1290	1243	1655	826	2135	1007	994	1752	1210	1079	1943	1063	564	1289	1028	1727	1188	1776	838	2252	1494	1348	1683	2112	1433	2262	1970	949	1259	1883	2256	983	1289	1101	1647	988	1459	1384	1811	1756	433	1398	1352
ENSG00000003096_KLHL13	129	27	0	53	84	73	23	13	81	351	140	114	5	110	110	122	212	73	9	82	67	156	121	161	34	78	55	134	152	143	163	175	124	75	131	93	135	138	145	39	108	80	74	110	93	166	82	106	97
ENSG00000003137_CYP26B1	0	0	0	0	0	4	0	15	0	0	0	0	0	0	0	0	0	0	0	0	0	0	0	0	0	0	0	0	3	2	0	0	0	0	0	0	4	0	7	0	0	3	0	0	0	0	0	3	0
ENSG00000003147_ICA1	670	201	180	154	694	95	548	418	1192	1374	805	999	645	1010	795	611	1026	1120	314	503	897	1023	264	1025	164	593	706	1088	970	793	1141	961	1175	1273	1894	1203	1305	1613	1135	367	1059	511	1043	1109	1187	1608	848	1424	987
ENSG00000003249_DBNDD1	0	0	0	0	0	9	0	0	0	0	0	0	0	0	0	0	0	0	0	0	0	0	0	0	0	0	0	0	0	0	0	0	0	0	2	0	0	0	0	0	0	0	0	0	0	0	0	0	0
ENSG00000003393_ALS2	200	195	42	54	40	25	59	117	507	265	536	373	180	192	343	152	230	200	49	116	250	196	212	308	64	578	644	227	319	288	479	612	351	240	430	371	377	202	225	153	180	330	264	209	227	274	42	162	237
ENSG00000003400_CASP10	53	39	30	21	14	0	0	0	168	32	143	25	0	31	40	69	17	7	15	0	21	4	4	145	0	922	211	88	56	152	65	521	82	20	21	7	12	19	9	28	16	32	83	12	21	19	19	8	4
ENSG00000003402_CFLAR	1792	1341	1200	864	2107	697	1365	1064	2858	1530	3186	1486	916	1153	1916	1810	1750	1046	948	1034	1303	1521	1090	2850	836	4599	7678	4204	2006	2187	2161	3294	1627	1664	2275	2037	1435	1784	1528	728	1519	1597	2017	1128	1701	1679	1437	1438	1322
ENSG00000003436_TFPI	5049	3520	2859	1961	5458	3178	3325	2552	4201	5220	5917	4016	2819	4374	4181	3726	5104	2782	2545	3102	3828	4827	2234	4284	1768	2119	3334	3693	6027	4658	4362	4201	3880	7576	7417	5075	5014	6024	4791	2501	4202	2963	4868	3721	4572	5479	3209	4784	5776
ENSG00000003509_NDUFAF7	6	38	7	1	11	7	0	0	84	23	32	3	0	0	26	56	17	0	9	0	37	35	0	131	0	536	330	44	42	104	177	359	53	35	10	19	15	37	24	3	17	13	24	33	46	23	0	12	9
ENSG00000003756_RBM5	1002	716	562	491	613	1189	495	365	1397	591	1229	534	424	625	690	730	516	602	663	524	561	565	664	1249	374	3618	3278	1371	726	1135	1199	2261	810	712	979	875	880	718	631	251	718	571	823	488	715	855	820	647	620
ENSG00000003987_MTMR7	0	0	0	0	0	1	0	0	0	0	0	0	0	0	0	13	4	0	0	0	0	0	0	0	0	14	16	4	0	10	18	17	0	1	0	0	0	0	0	0	3	0	0	0	0	0	0	0	0
ENSG00000003989_SLC7A2	0	2	1	2	0	4	1	1	0	0	0	0	0	0	0	0	0	0	0	0	0	0	0	0	1	0	0	0	0	0	0	0	0	0	0	0	0	0	0	0	0	0	0	0	0	0	2	0	0
ENSG00000004059_ARF5	1853	1660	1150	1203	1340	1233	1555	978	2554	1186	2452	1606	1306	1529	1398	911	1827	2024	1517	1575	1412	1422	1318	1233	830	1181	964	1241	1463	1246	1303	1046	2030	1871	1431	1548	1541	1039	2585	1317	1541	1593	1625	1643	1729	1674	486	1377	1411
ENSG00000004139_SARM1	1	0	5	0	0	12	0	47	31	0	13	0	0	0	4	14	13	0	6	0	2	1	0	12	0	105	20	10	4	23	14	56	9	0	0	0	3	9	0	0	0	0	0	2	4	2	0	5	0
ENSG00000004142_POLDIP2	270	49	209	57	161	143	18	118	200	21	333	101	109	141	230	87	285	90	47	93	109	145	131	288	61	449	343	186	139	253	189	357	148	79	147	119	175	138	69	74	109	162	156	107	154	130	106	122	182
ENSG00000004399_PLXND1	10	3	17	3	15	14	39	5	52	0	76	3	0	4	4	42	7	0	38	19	10	3	12	110	0	643	217	113	111	228	254	563	14	8	17	43	0	47	1	0	1	24	37	11	31	58	1	0	2
ENSG00000004455_AK2	203	177	263	248	147	127	242	99	515	94	605	217	27	147	179	277	133	119	341	112	239	163	61	539	102	1840	1191	352	268	514	491	1333	357	128	126	101	148	280	98	94	200	153	272	129	296	239	56	75	106
ENSG00000004468_CD38	11	128	184	9	29	2	47	1	312	2	163	15	21	29	49	53	2	40	15	5	27	32	0	220	0	889	350	139	72	228	311	630	71	20	46	13	28	17	15	15	14	1	93	5	71	56	0	13	40
ENSG00000004478_FKBP4	2	0	21	0	4	99	0	1	111	10	28	13	0	1	5	14	0	1	0	1	10	24	0	38	10	239	70	30	27	28	71	132	17	3	0	1	8	16	4	2	1	37	16	4	14	9	30	0	0
ENSG00000004487_KDM1A	498	355	238	207	573	102	231	234	843	462	486	501	732	575	733	634	671	688	264	432	620	552	351	775	414	1251	816	660	865	678	587	908	700	926	882	863	535	867	654	353	586	493	532	440	751	713	344	723	449
ENSG00000004534_RBM6	461	663	807	430	460	367	388	297	1136	482	923	503	415	524	778	874	358	497	296	491	588	513	288	1193	202	5496	3211	1132	883	1281	1946	3559	1006	602	723	692	609	948	594	317	575	568	753	501	636	648	449	524	466
ENSG00000004660_CAMKK1	25	0	78	32	147	3	93	14	30	27	46	11	24	49	15	57	73	13	77	38	17	24	1	39	39	80	152	83	64	62	25	37	30	29	39	13	2	8	68	24	39	12	54	10	31	15	72	30	42
ENSG00000004700_RECQL	1009	543	507	363	543	147	526	390	1077	683	1084	588	633	1569	1072	937	1577	1120	391	473	821	944	353	1116	518	1790	998	867	829	1107	1181	1667	1604	1244	1029	912	1606	842	1227	317	979	447	912	882	1282	1251	338	894	1079
ENSG00000004766_CCDC132	221	373	212	111	189	219	221	98	445	314	338	308	274	369	259	379	358	381	120	81	395	278	140	329	120	688	615	341	440	408	567	833	419	343	525	371	343	496	379	107	393	238	382	320	417	306	187	486	412
ENSG00000004776_HSPB6	1	2	0	0	4	22	3	5	9	0	0	6	0	7	1	0	6	1	0	5	3	3	1	2	0	0	3	4	3	1	10	6	0	3	5	0	3	12	4	0	0	3	9	0	0	1	0	2	3
ENSG00000004777_ARHGAP33	0	0	0	0	0	3	0	3	18	0	6	6	0	0	3	7	0	0	0	0	4	4	0	5	0	87	64	9	5	12	23	51	11	1	0	2	0	4	0	0	1	0	8	0	0	3	11	0	3
ENSG00000004779_NDUFAB1	24	3	37	3	8	27	29	3	34	7	57	9	9	1	7	8	5	11	17	6	6	14	4	39	30	142	100	22	24	54	121	137	17	2	10	0	6	19	4	18	2	5	19	2	29	3	15	4	0
ENSG00000004799_PDK4	0	0	0	0	0	2	0	0	2	0	1	0	0	0	0	0	0	0	0	0	0	0	0	24	0	13	98	20	13	31	38	33	3	0	0	17	0	13	4	0	2	0	0	0	5	18	5	2	1
ENSG00000004809_SLC22A16	9	0	0	0	0	1	0	0	0	0	2	1	0	0	0	56	0	5	0	0	2	0	0	11	0	6	32	1	27	10	18	15	1	0	11	4	5	15	3	7	3	0	7	0	0	2	0	3	0
ENSG00000004838_ZMYND10	0	0	0	4	0	3	0	2	19	0	1	0	0	0	10	1	0	0	0	0	0	0	0	3	0	36	20	3	2	7	9	52	1	0	0	2	0	3	0	0	1	0	3	0	0	0	0	0	0
ENSG00000004846_ABCB5	8	0	0	0	0	0	0	60	8	2	0	10	0	0	13	0	4	6	0	0	1	8	26	4	0	2	13	2	10	2	0	20	6	7	41	52	2	17	19	0	14	0	16	0	9	3	0	7	16
ENSG00000004848_ARX	0	0	0	0	0	9	0	1	0	0	0	0	0	0	0	0	0	0	0	0	0	0	0	0	0	0	0	0	0	0	0	0	1	0	0	0	0	0	0	0	0	0	0	0	0	0	0	0	0
ENSG00000004864_SLC25A13	17	109	139	27	73	98	2	59	159	69	164	124	34	136	134	135	83	98	35	86	93	65	33	170	129	296	320	186	138	183	231	288	118	71	110	132	107	226	72	85	95	57	165	110	145	142	129	108	113
ENSG00000004866_ST7	4840	1641	2414	1326	5365	1659	3399	1864	5005	3653	5928	2779	2392	3924	3018	2787	4956	3156	1749	1751	3792	4892	1615	3150	1927	1932	2204	2872	3868	3017	2253	2930	3661	4369	5314	3522	3901	4088	5120	1703	3749	2293	3662	4619	5039	4360	1612	3721	3724
ENSG00000004897_CDC27	1884	1605	816	1169	1900	1012	1154	549	1887	1666	2756	1828	1327	1788	1699	2031	2995	1617	906	742	1671	2232	688	2115	845	1783	2104	1675	2060	2078	1989	2084	1889	2951	2517	2007	2198	2502	1869	740	1655	1274	1816	1876	2169	2322	868	2288	2690
ENSG00000004939_SLC4A1	1504	84	1844	730	382	66	551	89	743	132	704	641	168	195	75	9903	397	1308	1052	133	140	212	47	1157	2955	3879	32180	2095	8531	4881	1537	3791	279	85	217	1404	88	49	202	454	92	60	1406	74	309	198	24	27	11
ENSG00000004948_CALCR	0	0	0	0	0	0	0	0	0	0	0	0	0	0	0	0	0	0	0	0	0	0	0	0	0	0	0	0	0	0	0	0	0	0	0	0	0	0	0	0	0	0	0	0	0	0	0	0	0
ENSG00000004961_HCCS	2	1	18	78	148	53	0	31	57	9	64	34	0	18	23	58	53	24	0	42	21	17	0	63	49	165	281	72	73	75	111	124	32	8	32	12	25	38	21	20	37	34	0	26	34	7	38	21	42
ENSG00000004975_DVL2	20	14	29	7	30	11	9	44	30	0	29	12	0	7	5	4	4	9	16	0	14	12	2	58	1	269	132	33	35	51	74	165	27	3	8	26	5	39	3	8	19	1	40	4	19	22	11	6	15
ENSG00000005001_PRSS22	0	0	0	0	0	5	7	0	0	0	0	0	0	0	0	0	0	0	0	0	0	0	0	3	0	3	2	0	0	0	0	0	0	0	0	0	0	0	0	0	0	0	0	0	0	0	0	0	0
ENSG00000005007_UPF1	1309	241	569	343	959	332	390	1089	1853	928	1724	1177	877	955	1326	1187	1527	832	483	481	965	919	429	1035	279	1623	1772	1347	1251	1252	1125	1352	1163	948	1256	1280	916	970	1112	578	806	927	1153	902	1056	934	738	993	1062
ENSG00000005020_SKAP2	16574	17768	8561	8564	12972	7855	11099	10280	18696	14311	16131	11722	10387	16237	13688	13949	19633	13844	6751	7235	13402	22019	4820	15011	7326	7970	10226	14185	14784	16583	12684	13651	17729	21787	22049	16500	18702	19171	18184	6571	15431	8246	16024	15965	18890	19949	8098	20335	18968
ENSG00000005022_SLC25A5	709	644	633	688	686	676	846	414	913	461	1040	321	602	922	579	531	1128	791	590	706	763	578	815	922	239	1238	661	668	799	754	668	846	761	619	896	731	959	538	1057	981	712	671	526	636	1049	811	361	764	665
ENSG00000005059_CCDC109B	12	14	26	9	19	6	0	0	25	19	46	0	4	2	6	28	3	13	6	0	12	5	0	40	0	135	126	24	34	62	44	106	9	5	16	14	6	8	4	2	2	17	7	8	19	22	2	2	12
ENSG00000005073_HOXA11	0	0	0	0	0	1	0	1	0	0	0	0	0	0	0	0	0	0	0	0	0	0	0	0	0	4	0	0	0	0	0	0	0	0	0	0	0	0	0	0	0	0	0	0	0	0	0	0	0
ENSG00000005075_POLR2J	970	801	1114	708	1034	820	786	156	893	197	1598	602	245	979	604	711	764	313	758	1688	525	906	837	1490	484	1608	1260	1145	876	755	637	1269	880	584	397	767	684	633	823	936	402	799	810	567	822	567	440	521	548
ENSG00000005100_DHX33	136	27	149	10	165	43	19	170	220	116	358	99	159	226	202	229	215	136	50	57	106	165	0	149	92	252	196	195	191	145	165	268	172	161	156	107	212	133	126	74	89	60	166	172	246	171	182	198	161
ENSG00000005102_MEOX1	0	1	0	0	0	2	0	0	0	0	2	0	0	0	0	0	0	0	0	2	0	0	0	0	0	0	0	0	0	0	0	0	0	0	0	1	0	0	0	3	0	0	0	0	0	0	0	1	0
ENSG00000005108_THSD7A	0	1	0	0	0	2	0	0	13	0	0	0	0	0	0	0	0	2	0	0	0	2	0	0	0	1	0	0	0	0	12	0	0	0	0	0	0	0	0	0	0	0	0	0	0	0	3	0	0
ENSG00000005156_LIG3	23	56	39	2	9	41	39	0	122	2	90	18	1	0	48	35	24	14	0	7	13	6	0	125	0	544	292	63	76	146	135	301	36	12	1	0	3	41	11	0	18	11	41	5	15	59	22	11	26
ENSG00000005175_RPAP3	1283	710	191	625	876	496	396	586	1060	550	1216	948	844	1112	721	589	1306	791	441	653	764	798	340	1077	341	1202	1171	1194	919	964	775	1446	945	902	874	1246	2068	933	1246	636	1115	306	950	845	971	1202	274	855	1079
ENSG00000005187_ACSM3	1171	125	163	198	164	129	200	343	116	259	719	251	114	190	228	40	218	491	51	211	185	245	120	174	420	91	131	250	244	143	170	193	150	405	223	120	412	161	129	74	256	218	346	229	171	201	64	247	359
ENSG00000005189_AC004381	411	68	66	141	187	255	98	179	326	316	332	284	89	171	214	135	239	353	96	183	190	229	168	235	19	136	185	279	222	188	121	147	177	377	432	285	150	319	248	98	172	297	291	179	203	204	159	267	331
ENSG00000005194_CIAPIN1	106	119	1	76	190	13	1	64	120	27	252	14	97	68	169	23	142	68	57	104	78	52	141	122	0	308	132	81	105	111	155	219	69	61	50	125	37	58	91	75	49	113	120	112	56	74	16	60	81
ENSG00000005206_SPPL2B	38	2	102	41	56	4	59	71	131	30	73	6	81	37	36	67	21	16	1	8	29	47	3	75	34	221	145	60	28	87	54	117	44	22	5	20	17	38	32	15	20	22	24	46	76	24	17	60	53
ENSG00000005238_FAM214B	720	233	86	137	489	188	249	260	606	374	871	356	239	393	458	320	432	385	188	183	316	358	97	330	283	352	496	597	416	302	478	378	504	239	303	542	341	143	359	143	407	109	369	334	425	390	125	234	321
ENSG00000005243_COPZ2	21	17	0	67	20	3	0	0	5	0	7	1	0	2	13	21	0	25	0	16	23	13	0	31	0	82	22	7	15	19	12	32	18	11	0	29	0	4	26	0	5	0	17	0	0	6	50	7	5
ENSG00000005249_PRKAR2B	94568	71071	49301	44222	74097	43205	66507	62905	106414	71983	109886	77970	82488	80777	74280	68201	108866	81012	44328	45445	86067	85577	37217	62330	45559	42432	41260	83926	84523	92724	76017	66956	102301	85959	99105	89511	103680	76075	104436	45089	79935	52993	78233	96101	104435	93716	36674	91244	94860
ENSG00000005302_MSL3	173	113	278	213	140	206	168	42	271	81	231	115	65	170	129	218	220	123	41	102	119	126	17	257	37	988	1016	409	237	359	468	503	244	101	118	135	226	308	137	59	148	149	267	86	130	115	118	158	187
ENSG00000005339_CREBBP	2848	1253	1312	826	2784	494	833	2071	4806	2094	4613	1970	1915	2303	3152	5207	3381	2042	825	1073	2383	2613	714	3591	941	13227	16154	6545	4097	4913	4366	7900	4013	1902	2149	2296	2872	2741	2327	838	2080	1668	3142	1985	2293	2805	1726	2119	2106
ENSG00000005379_BZRAP1	24	68	56	0	85	11	47	108	333	3	260	2	6	1	87	144	4	3	35	0	26	9	10	262	0	2290	727	110	149	339	661	1437	252	4	1	29	0	102	19	0	67	0	172	15	21	92	2	0	9
ENSG00000005381_MPO	9	0	229	574	31	2	6	0	31	1	76	3	0	50	2	296	40	5	12	0	0	0	0	311	86	88	1136	23	74	115	0	78	27	9	0	12	2	0	0	0	0	20	3	4	0	3	15	0	0
ENSG00000005421_PON1	0	0	0	0	0	0	0	0	0	0	0	4	0	0	0	0	0	0	0	0	0	0	0	0	0	1	0	0	0	0	0	0	0	0	0	0	0	0	0	0	5	0	11	0	0	0	0	0	0
ENSG00000005436_GCFC2	26	26	34	69	21	161	80	0	32	39	66	24	24	47	29	58	64	32	28	75	56	35	24	63	0	284	181	89	74	95	75	240	58	71	87	8	33	69	50	13	72	73	57	32	44	109	7	63	33
ENSG00000005448_WDR54	10	0	0	27	0	8	6	26	31	0	29	0	4	0	0	0	2	5	3	0	3	4	0	6	0	92	27	2	0	10	49	46	8	0	0	0	0	17	0	0	0	0	5	11	0	0	0	0	1
ENSG00000005469_CROT	69	32	56	0	21	3	0	35	86	52	86	77	33	52	55	110	58	149	3	11	42	42	1	117	16	432	269	44	72	105	151	388	145	64	117	75	42	87	97	48	60	67	52	19	45	112	48	36	66
ENSG00000005471_ABCB4	0	0	1	1	0	0	1	32	1	0	30	0	0	0	4	0	0	0	0	0	0	3	0	0	0	18	87	1	27	14	0	13	2	7	0	0	0	0	0	0	2	0	2	0	8	15	0	0	0
ENSG00000005483_KMT2E	4944	2960	1932	2070	4313	1332	2141	2447	6149	4583	6448	3733	2911	4037	3648	3323	4081	4185	1811	2118	3399	4323	1842	5078	1915	9253	8935	6223	4210	4827	4786	8124	4742	5039	6509	4784	4940	6281	4128	1846	3963	2559	4526	3406	3739	4990	3284	4384	4400
ENSG00000005486_RHBDD2	116	55	131	61	68	40	28	92	100	119	123	104	71	113	89	88	81	85	64	66	101	64	97	57	5	202	115	73	80	101	127	138	108	67	60	94	115	116	100	48	68	81	92	66	87	76	58	85	83
ENSG00000005513_SOX8	0	0	0	0	0	7	0	2	0	0	0	0	0	0	0	0	0	0	0	0	0	0	0	0	0	0	0	0	0	0	0	0	0	0	0	0	0	0	0	0	0	0	0	0	0	0	0	0	0
ENSG00000005700_IBTK	355	402	614	302	317	359	195	196	693	320	518	467	319	263	405	416	455	529	366	323	487	455	372	655	120	1258	882	560	560	637	830	1367	626	744	677	573	561	618	480	211	399	315	548	451	534	623	211	523	346
ENSG00000005801_ZNF195	9	57	60	1	0	6	0	1	71	0	38	3	0	0	12	24	0	5	0	0	13	2	0	57	21	363	140	31	26	86	119	205	16	1	2	0	1	31	1	0	14	0	21	0	13	20	4	6	0
ENSG00000005810_MYCBP2	7086	5401	3433	1820	8583	2820	2972	5156	9030	8250	10404	5627	4242	5745	8502	10061	13945	4079	2438	3336	8191	10090	3210	9364	3801	12218	11167	8273	10319	8569	8646	14394	7312	5284	8100	8852	6316	9849	8023	2122	7147	7411	10898	8183	8288	7660	4379	8304	6462
ENSG00000005812_FBXL3	1075	527	329	237	873	203	497	476	1118	693	1243	715	383	664	653	662	988	513	181	299	658	842	181	890	404	933	1110	1272	876	858	889	1163	867	704	1163	910	1061	773	978	367	817	549	949	715	824	1072	420	754	608
ENSG00000005844_ITGAL	300	797	700	551	768	46	129	316	3077	97	2058	134	219	225	1032	1013	189	99	398	156	426	90	205	2359	47	13104	5702	1576	1193	2418	5016	9215	1539	66	129	318	50	1043	160	75	467	42	945	141	417	493	74	238	85
ENSG00000005882_PDK2	808	241	196	150	613	98	534	474	502	339	1356	485	443	390	649	485	991	330	371	284	326	370	471	550	165	540	338	395	779	625	340	426	429	464	564	360	92	327	567	133	372	366	373	530	511	189	226	443	271
ENSG00000005884_ITGA3	0	0	1	1	0	99	3	5	9	0	2	0	2	1	0	0	0	1	0	0	0	32	0	0	21	7	1	0	2	0	8	6	7	0	0	0	0	6	0	0	0	0	0	1	0	15	118	0	0
ENSG00000005889_ZFX	421	275	431	193	461	11	254	383	517	290	670	202	263	306	227	243	189	293	108	72	254	260	80	519	330	3429	2254	620	498	559	624	1310	365	193	229	318	597	293	193	77	208	234	403	210	216	291	232	223	273
ENSG00000005893_LAMP2	1812	1231	1198	710	1937	1229	2113	714	2572	1073	3495	1285	632	1834	1493	1571	2182	1259	794	965	1794	1708	1024	1987	682	1867	3796	1849	1659	1762	1678	1765	2076	2071	1846	1391	2787	1917	2312	667	1521	902	1734	2013	2298	2218	839	1542	2235
ENSG00000005955_GGNBP2	332	143	335	109	298	249	93	190	477	223	413	200	185	198	379	219	172	194	74	87	210	194	338	589	196	1597	1133	567	302	431	526	1007	449	378	292	334	298	331	178	163	216	227	220	166	311	251	206	205	201
ENSG00000005961_ITGA2B	191921	116042	93913	42688	218862	104372	126665	163382	303038	133865	297687	135483	136992	152445	187917	188286	240015	126223	91116	88380	180233	212870	78803	111528	86972	56432	67296	166287	199340	202151	147972	116396	240035	71825	158769	162151	153144	115933	203696	63984	136475	131793	234733	189159	193847	165617	88326	169773	181146
ENSG00000005981_ASB4	0	0	0	0	0	30	0	0	0	0	0	0	0	0	0	0	0	0	0	0	0	0	0	0	0	0	0	0	0	0	0	0	0	0	0	0	0	0	0	0	0	0	0	0	0	0	0	0	0
ENSG00000006007_GDE1	1185	778	429	313	1377	987	745	667	1539	751	1550	986	1077	1256	1119	1031	1464	1076	495	749	1289	1290	592	1151	513	777	1127	1149	1284	1435	999	1255	1159	1230	1235	1555	1006	1119	1324	614	937	806	1629	1461	1481	1382	465	1258	1482
ENSG00000006015_C19orf60	12	6	27	19	17	23	18	28	33	11	35	10	3	14	16	18	18	8	48	35	16	28	10	21	7	127	32	25	8	9	30	42	22	13	17	14	11	16	17	17	21	17	24	17	35	12	1	15	11
ENSG00000006016_CRLF1	0	0	0	0	0	2	0	0	0	0	0	0	0	0	0	0	0	0	0	0	0	0	0	0	0	0	1	0	0	0	0	0	1	0	0	0	0	0	0	0	0	0	0	0	0	0	0	0	0
ENSG00000006025_OSBPL7	2	2	29	0	14	3	0	6	60	10	42	15	0	0	45	22	6	0	0	1	7	0	0	43	0	537	132	48	25	73	107	300	41	0	0	9	0	21	3	0	3	6	14	0	5	15	1	5	1
ENSG00000006042_TMEM98	1	0	0	0	0	1	0	0	0	1	0	0	0	0	0	0	0	0	0	0	0	0	0	1	0	0	3	0	0	0	0	1	0	0	0	0	0	0	0	0	0	0	0	0	0	0	0	0	0
ENSG00000006047_YBX2	0	0	0	0	0	3	0	0	0	0	0	0	0	0	0	7	0	0	0	0	0	0	0	0	0	0	4	0	0	0	0	0	0	0	0	0	0	0	0	0	0	0	0	0	0	0	1	0	0
ENSG00000006059_KRT33A	0	0	0	0	0	0	0	0	0	0	0	0	0	0	0	0	0	0	0	0	0	0	0	0	0	0	0	0	0	0	0	0	0	0	0	0	0	0	0	0	0	0	0	0	0	0	0	0	0
ENSG00000006062_MAP3K14	5	9	4	2	7	6	1	1	65	0	35	0	10	0	19	55	1	0	0	32	3	0	0	73	51	393	261	40	55	68	132	237	34	1	0	3	0	31	0	0	16	0	13	0	1	7	46	6	18
ENSG00000006071_ABCC8	0	0	0	0	0	1	0	1	0	0	0	0	0	0	0	0	0	0	0	0	0	4	0	0	0	0	0	0	0	0	0	0	6	7	0	0	0	0	0	0	4	0	0	11	0	0	0	0	0
ENSG00000006074_CCL18	0	0	0	0	0	0	1	0	0	0	0	0	0	0	0	0	0	0	0	0	1	0	0	0	0	0	1	2	0	0	2	1	0	0	0	0	0	1	0	0	1	0	0	0	0	0	0	0	0
ENSG00000006075_CCL3	1	127	28	63	54	0	0	0	157	0	47	0	0	0	33	275	0	0	97	40	7	7	0	238	0	387	441	90	44	219	543	465	62	0	0	39	0	0	10	7	22	0	26	0	11	6	0	3	0
ENSG00000006114_SYNRG	585	323	196	38	722	33	199	130	1053	377	1098	284	153	458	642	604	447	362	363	215	401	417	142	1016	171	3662	2493	881	682	1049	1566	2910	627	353	595	442	539	558	452	316	437	475	731	356	352	570	234	437	449
ENSG00000006116_CACNG3	0	0	0	0	0	0	0	1	0	0	0	0	0	0	0	0	0	0	0	0	0	0	0	0	0	0	0	0	0	0	0	0	0	0	0	0	0	0	0	0	0	0	0	0	0	0	0	0	0
ENSG00000006118_TMEM132A	0	1	0	5	0	6	1	1	2	0	0	0	0	0	1	2	0	0	0	0	0	0	0	6	0	9	53	19	2	2	3	2	2	0	0	0	0	1	0	0	0	0	0	1	3	0	6	0	0
ENSG00000006125_AP2B1	7621	5485	4869	3590	11786	3800	4443	8085	16798	8391	16042	10049	6441	8425	8648	7505	11175	9830	3187	3594	6247	11160	3529	7193	6055	6291	7465	11019	8722	8958	6855	9213	13052	9441	11769	10604	10996	8893	11378	4626	8648	6076	13098	7221	9548	10777	6114	9752	13294
ENSG00000006128_TAC1	0	0	0	0	0	0	0	0	0	0	0	0	0	0	0	0	0	0	0	0	0	0	0	0	0	0	0	0	0	0	0	0	0	0	0	0	0	0	0	0	0	0	0	0	0	0	0	0	0
ENSG00000006194_ZNF263	9	3	0	0	8	28	4	1	38	0	24	0	0	0	18	14	0	3	9	3	3	1	0	37	0	192	114	34	17	54	52	140	9	12	0	26	2	18	2	0	4	0	47	2	3	3	0	1	0
ENSG00000006210_CX3CL1	7	0	0	0	0	3	0	2	5	0	6	0	0	1	0	0	0	0	0	0	0	0	0	1	0	0	0	0	0	0	4	0	0	0	0	0	4	0	1	0	0	2	0	0	0	0	1	0	0
ENSG00000006282_SPATA20	11	46	1	0	26	54	0	3	66	10	33	0	0	8	15	13	5	2	0	0	16	3	0	45	4	252	144	22	24	62	74	196	27	0	2	14	0	14	3	0	1	0	5	3	0	4	2	2	0
ENSG00000006283_CACNA1G	0	0	0	0	0	6	0	2	0	0	0	0	0	0	0	0	0	0	0	0	0	0	0	0	0	0	0	0	0	0	0	0	1	0	0	0	0	0	0	0	0	0	0	0	0	0	1	0	0
ENSG00000006327_TNFRSF12A	0	0	0	0	0	33	0	1	1	0	0	0	0	1	0	0	0	0	0	0	0	6	0	1	12	3	7	0	0	1	0	1	0	0	0	0	0	0	0	0	0	0	4	0	1	1	0	0	0
ENSG00000006377_DLX6	0	0	1	0	0	2	0	0	0	0	0	0	0	0	0	0	0	0	0	0	0	0	0	0	0	0	0	0	0	0	0	0	0	0	0	0	0	0	0	0	0	0	0	0	0	0	0	0	0
ENSG00000006432_MAP3K9	0	1	1	4	0	5	0	1	23	0	5	1	0	0	1	0	0	0	0	0	4	0	0	6	0	63	21	4	5	6	8	37	13	1	0	0	0	0	0	0	2	0	1	0	4	7	17	0	0
ENSG00000006451_RALA	125	85	1	9	36	42	99	133	99	69	234	49	11	33	87	56	80	45	28	68	31	64	105	100	139	174	86	46	90	63	90	156	93	57	69	37	69	76	64	50	51	58	78	33	55	36	9	56	60
ENSG00000006453_BAIAP2L1	0	1	0	0	0	11	1	2	1	2	0	0	0	0	0	0	0	0	0	0	0	0	0	1	5	3	19	3	0	4	0	4	0	0	0	1	0	0	0	0	0	0	0	0	2	5	5	0	0
ENSG00000006459_JHDM1D	3127	1358	1607	632	3232	412	872	1473	3264	3513	3835	2378	1954	1851	2617	2872	3114	2131	746	1194	1694	2195	511	2367	1783	2635	5417	4082	5828	4267	2454	3248	2485	2244	2739	2309	2136	2824	2571	1008	1623	2278	2716	2225	2538	2055	1244	2041	2636
ENSG00000006468_ETV1	4	0	1	0	0	2	1	0	0	7	0	8	0	4	0	0	0	0	0	0	2	1	0	0	0	0	5	0	0	0	0	2	0	0	0	0	6	0	0	0	3	0	0	0	0	0	10	1	0
ENSG00000006530_AGK	35	160	113	9	21	37	1	1	120	14	78	24	0	15	67	45	20	24	0	2	28	21	8	122	35	580	323	92	68	161	182	361	57	44	40	64	46	26	45	23	37	58	36	26	35	42	55	15	4
ENSG00000006534_ALDH3B1	0	0	41	5	1	11	0	0	3	0	0	1	0	1	0	14	0	0	12	0	0	0	3	30	0	26	59	18	23	23	5	16	4	1	0	4	2	5	7	2	0	0	0	0	0	18	18	0	0
ENSG00000006555_TTC22	7	10	8	0	0	3	0	0	16	0	27	0	0	0	9	12	0	0	1	0	3	0	5	24	0	142	55	14	1	23	62	173	20	0	0	10	0	8	0	0	0	15	1	0	8	9	1	0	0
ENSG00000006576_PHTF2	4342	1791	1249	1426	3835	1500	2123	2096	5311	1939	6377	2971	2420	2489	2641	2188	3577	2655	1560	1246	3203	3157	1125	2788	2372	1438	1933	3310	3846	3080	2756	2912	4688	3311	3415	3297	2932	1866	3773	1115	3405	1409	3450	2956	3757	3480	899	2852	3273
ENSG00000006606_CCL26	0	0	0	0	0	0	0	0	0	0	0	0	0	0	0	0	0	0	0	0	0	5	0	0	0	0	0	0	0	0	0	0	0	0	0	0	0	0	0	0	0	0	0	0	0	0	0	0	0
ENSG00000006607_FARP2	64	49	220	114	77	205	29	15	189	86	97	84	74	82	144	45	116	111	80	48	102	87	61	95	14	240	126	128	137	105	185	137	145	123	151	153	95	142	107	67	99	108	139	61	194	90	138	190	115
ENSG00000006611_USH1C	0	0	0	0	0	4	0	0	0	0	0	0	0	0	0	0	0	0	0	0	0	0	0	0	0	0	0	0	0	0	0	0	0	0	0	0	0	0	0	0	0	0	0	0	0	0	0	0	0
ENSG00000006625_GGCT	5	30	0	23	4	109	20	8	24	18	14	1	0	4	6	6	11	8	0	0	16	14	0	6	0	35	39	19	21	16	46	61	15	10	12	5	9	3	13	12	14	0	6	7	7	16	3	9	0
ENSG00000006634_DBF4	11	104	15	14	31	69	32	11	75	80	37	22	7	27	15	41	6	23	27	26	36	45	0	65	6	228	93	26	37	76	92	171	51	44	71	54	22	55	40	7	19	14	35	24	37	38	80	26	31
ENSG00000006638_TBXA2R	2254	1099	721	599	2965	1174	1563	2046	2915	2022	3863	1468	1875	2291	1994	1508	2007	1240	1279	2019	1393	1893	1314	1535	840	1210	1548	3012	2295	1564	1725	1668	2179	1411	2056	2167	2142	1303	2147	1258	1417	1155	2098	1625	2357	2093	1193	1937	1774
ENSG00000006652_IFRD1	19246	10862	5611	7574	16414	6275	9332	11158	24508	9584	19663	11472	12320	15585	8143	7677	12030	15876	6344	7330	11875	11504	3836	16747	7512	8876	9975	16495	13253	9782	11799	14043	16467	15056	14026	15628	18434	10479	15626	8469	13751	4359	13841	11634	15486	16181	5280	12090	17588
ENSG00000006659_LGALS14	0	0	0	0	0	1	0	0	0	0	0	0	0	0	0	0	0	0	0	0	0	0	0	0	0	0	0	0	0	0	0	0	0	0	0	0	0	0	0	0	0	0	0	0	0	0	0	0	0
ENSG00000006695_COX10	7	13	0	12	26	4	0	39	31	0	39	19	12	10	31	65	3	14	44	8	18	23	0	54	0	224	134	41	29	76	36	145	32	34	25	20	0	42	17	3	7	23	44	25	6	56	37	16	21
ENSG00000006704_GTF2IRD1	2	0	1	1	0	16	1	2	0	0	0	0	0	0	0	0	0	0	0	0	0	2	0	0	0	0	4	0	1	0	1	0	0	0	0	0	0	0	0	0	0	0	0	0	0	0	2	1	0
ENSG00000006712_PAF1	311	153	213	7	320	53	299	263	331	149	605	136	126	205	419	279	374	195	337	310	150	258	151	450	56	1130	999	532	291	391	568	864	347	165	209	263	334	259	192	185	205	316	383	252	284	182	258	217	204
ENSG00000006715_VPS41	5982	4432	3927	2796	4964	2840	3402	3687	6582	3475	6762	5116	4383	6496	4987	4350	8747	5228	3296	3052	4267	6679	2775	4283	2007	3723	3831	4562	5831	5382	4510	5307	6513	5487	5980	5416	7375	5263	5852	3005	5194	3599	5720	5628	7751	6784	2202	5476	6444
ENSG00000006740_ARHGAP44	0	0	1	0	0	3	0	0	0	0	0	0	0	0	0	0	0	0	0	0	0	0	0	0	0	1	0	0	2	0	0	0	0	0	0	0	0	0	0	0	0	0	0	0	0	0	0	0	0
ENSG00000006744_ELAC2	346	53	200	77	172	177	4	141	436	206	543	33	99	80	207	115	255	47	87	48	152	66	11	280	109	1212	502	162	205	313	476	861	209	70	98	138	77	149	57	63	120	85	283	54	144	90	20	132	91
ENSG00000006747_SCIN	0	0	0	0	12	99	0	0	0	0	57	7	0	5	5	0	106	4	0	50	32	34	0	17	0	0	0	4	20	5	6	0	5	54	0	68	28	0	57	3	55	16	125	9	0	0	0	0	0
ENSG00000006756_ARSD	15	12	15	7	22	6	0	1	13	0	4	4	4	7	13	10	6	5	16	0	7	6	0	67	0	155	88	33	17	18	33	58	17	4	13	4	1	2	20	0	25	5	16	8	6	15	1	7	0
ENSG00000006757_PNPLA4	0	0	50	1	0	7	0	0	0	0	0	0	0	0	0	15	0	0	0	0	6	2	0	15	0	49	24	8	2	9	6	23	0	2	0	0	6	5	0	0	6	17	10	0	0	0	0	0	0
ENSG00000006788_MYH13	5	0	0	0	0	5	0	2	0	0	0	0	0	0	0	0	0	0	0	0	0	0	0	0	0	0	0	0	0	0	0	0	2	0	0	0	0	0	0	0	0	0	0	0	8	13	3	0	0
ENSG00000006831_ADIPOR2	1261	693	513	226	1269	205	606	621	1507	729	1960	1053	803	708	985	1003	1520	752	307	466	1116	1177	357	932	586	719	673	795	1384	984	1155	843	1155	933	1197	1021	832	729	1475	408	892	532	1400	1074	1197	1086	524	1119	905
ENSG00000006837_CDKL3	55	10	92	21	75	10	8	21	27	24	16	16	8	72	62	11	21	41	7	40	39	43	5	40	0	42	55	39	38	31	22	58	49	74	98	97	50	68	27	31	56	33	68	15	37	59	8	32	34
ENSG00000007001_UPP2	0	0	0	0	0	0	0	0	0	0	0	0	0	0	0	5	0	0	0	0	0	4	0	0	0	0	0	0	1	0	2	1	0	0	10	8	0	0	0	0	0	0	0	0	0	0	1	0	0
ENSG00000007038_PRSS21	0	0	0	0	0	2	0	0	34	0	11	0	0	0	0	0	0	0	46	0	0	0	2	3	0	21	1	5	2	0	36	0	2	0	0	0	4	0	0	0	6	0	4	0	0	0	0	0	0
ENSG00000007047_MARK4	371	108	162	66	405	95	300	165	714	293	580	350	141	334	306	252	293	336	139	190	360	225	216	239	161	487	329	405	352	315	332	454	386	298	346	360	301	282	418	253	251	349	433	516	289	278	106	365	375
ENSG00000007062_PROM1	0	0	0	28	3	3	1	1	2	0	0	8	0	6	0	7	0	0	0	0	9	3	7	9	0	5	48	8	8	1	14	4	0	11	4	13	3	1	0	0	0	0	3	0	10	6	5	15	5
ENSG00000007080_CCDC124	28	25	60	12	43	34	25	13	156	66	63	70	76	22	35	143	31	28	186	78	34	10	0	107	1	340	230	64	96	91	91	180	49	35	23	23	66	69	45	67	48	86	74	42	46	34	1	29	25
ENSG00000007129_CEACAM21	36	57	0	0	7	1	0	0	4	23	7	11	22	3	42	12	8	11	0	8	2	7	0	40	0	102	169	24	36	39	42	85	11	23	4	15	48	8	10	15	9	0	42	0	10	7	10	6	0
ENSG00000007168_PAFAH1B1	3344	931	992	1262	2466	1029	928	1211	2669	1838	3412	2112	2133	2730	1901	1641	2764	1647	573	1055	1788	1877	728	2958	976	3483	3105	3202	2274	1956	2263	3344	2166	1977	2524	2573	2814	2233	2240	990	2259	925	2302	1824	2198	2159	1147	2110	2594
ENSG00000007171_NOS2	0	0	1	0	0	0	1	1	0	0	4	0	0	0	0	0	0	0	0	0	3	0	0	0	0	5	0	0	0	0	0	3	0	0	0	4	0	0	0	0	1	0	0	0	0	0	0	0	0
ENSG00000007174_DNAH9	0	1	0	1	0	1	0	2	1	0	0	0	0	0	1	0	0	0	0	0	0	0	0	0	0	4	0	0	0	0	0	5	0	0	0	0	0	0	0	0	0	0	0	0	0	0	0	0	0
ENSG00000007202_KIAA0100	809	361	731	197	934	323	478	505	1330	529	1559	536	525	595	720	1099	1307	631	275	358	892	794	428	876	563	3374	2811	1056	1296	1467	1358	2413	1366	307	441	693	671	648	734	248	732	721	1032	961	862	610	426	677	605
ENSG00000007216_SLC13A2	0	0	0	0	0	0	0	1	0	0	0	0	0	0	0	0	0	0	0	0	0	0	0	0	0	0	0	0	0	0	0	0	0	0	0	0	0	0	0	0	0	0	0	0	0	0	0	0	0
ENSG00000007237_GAS7	54	2	110	67	42	1	0	28	72	0	49	6	0	6	18	35	14	0	70	0	16	6	16	210	0	733	947	182	94	267	223	407	58	0	1	20	20	29	2	0	4	0	24	3	46	75	7	7	6
ENSG00000007255_TRAPPC6A	13	13	25	6	28	14	59	2	26	0	33	1	8	1	0	38	1	18	0	2	12	3	0	41	13	48	47	25	16	23	6	48	21	7	0	0	11	0	13	0	7	3	9	13	6	6	1	13	7
ENSG00000007264_MATK	68	74	98	4	33	1	13	90	262	2	192	7	0	2	80	116	12	9	73	8	43	8	0	296	0	2036	698	124	131	301	437	1108	164	6	1	39	2	117	4	0	52	12	107	30	45	52	1	4	0
ENSG00000007306_CEACAM7	0	0	0	0	0	0	0	0	0	0	0	0	0	0	0	0	0	0	0	0	0	0	0	0	0	0	0	0	0	0	0	0	0	0	0	0	0	0	0	0	0	0	0	0	0	0	0	0	0
ENSG00000007312_CD79B	6	41	52	0	14	4	0	0	23	0	47	0	0	0	36	5	0	0	0	0	10	0	0	48	0	95	190	22	106	111	12	105	9	0	5	12	0	3	0	0	23	33	27	0	25	35	0	0	9
ENSG00000007314_SCN4A	1	0	0	0	0	4	3	1	7	4	7	9	0	24	0	8	0	4	0	4	2	0	0	6	0	0	6	3	3	2	3	1	4	0	0	1	0	3	0	0	2	0	3	11	8	1	1	4	0
ENSG00000007341_ST7L	495	548	630	308	523	515	474	270	1058	920	889	732	527	806	627	667	516	764	366	368	724	836	266	829	336	688	610	757	854	729	701	793	880	1103	1469	1246	731	1321	812	336	702	516	873	813	1055	941	580	896	875
ENSG00000007350_TKTL1	10	0	0	0	375	0	81	30	62	0	10	6	0	11	22	6	2	3	6	0	15	22	0	121	0	377	65	41	27	48	14	61	48	2	0	22	31	8	20	3	19	0	16	1	8	18	0	6	17
ENSG00000007372_PAX6	0	0	0	0	0	5	0	2	0	0	0	0	0	0	0	0	0	0	0	0	0	0	0	0	0	2	1	0	0	0	0	1	0	0	0	1	0	0	0	0	2	0	0	0	0	0	0	0	0
ENSG00000007376_RPUSD1	12	4	12	0	22	8	0	16	8	1	12	8	0	0	3	18	0	2	14	0	2	5	5	14	18	71	20	13	16	8	8	36	10	5	2	6	16	9	8	0	16	5	12	5	11	9	5	6	1
ENSG00000007384_RHBDF1	4	0	0	0	0	30	1	2	0	0	0	0	0	0	1	0	0	0	0	0	0	0	0	0	0	0	0	0	0	2	1	0	0	0	0	0	0	0	0	0	0	0	0	0	0	0	0	0	0
ENSG00000007392_LUC7L	78	67	179	9	48	110	38	74	119	17	124	24	8	43	58	119	27	60	23	39	56	57	46	114	32	732	422	106	141	156	178	488	96	60	25	32	74	67	42	92	46	50	75	65	59	68	21	54	76
ENSG00000007402_CACNA2D2	5	3	0	0	37	2	0	9	177	0	47	0	0	0	70	123	0	0	68	0	20	0	0	146	0	1047	290	40	72	114	146	791	98	0	0	17	3	14	2	0	59	0	50	0	21	40	11	8	0
ENSG00000007516_BAIAP3	2	13	6	0	0	6	0	2	0	16	5	0	0	0	2	19	0	0	0	0	0	0	0	8	0	112	132	24	1	5	6	4	6	0	0	0	0	0	3	0	0	0	0	0	0	0	0	0	0
ENSG00000007520_TSR3	21	10	5	7	59	25	40	38	56	13	26	11	12	26	14	23	36	19	0	10	20	22	57	31	26	90	76	30	32	51	33	70	32	18	11	30	30	25	35	6	20	21	39	33	34	32	14	19	16
ENSG00000007541_PIGQ	46	20	13	0	39	17	25	9	60	2	73	10	25	58	28	21	22	40	3	26	22	12	11	36	12	93	92	34	60	40	48	89	38	13	2	27	46	23	34	13	29	42	24	21	52	22	24	9	19
ENSG00000007545_CRAMP1L	74	65	75	8	35	20	3	37	161	11	127	49	1	40	52	38	42	52	2	11	51	40	0	62	0	488	234	98	52	138	124	203	42	26	29	86	45	56	65	23	39	27	35	28	13	70	69	35	19
ENSG00000007866_TEAD3	0	0	0	0	0	5	1	0	4	0	0	0	0	0	0	0	0	0	0	0	0	0	0	0	0	1	0	0	0	0	0	0	0	0	0	0	0	0	0	0	0	0	0	0	0	0	0	0	0
ENSG00000007908_SELE	3	1	1	0	0	1	0	0	6	0	0	6	0	0	0	0	0	0	0	0	0	2	0	0	0	0	0	0	2	1	0	3	1	3	0	0	0	4	0	0	0	0	0	8	4	0	0	0	3
ENSG00000007923_DNAJC11	19	32	49	0	16	46	3	1	128	29	77	8	0	2	15	38	41	21	109	84	23	5	47	90	0	254	199	51	54	87	116	237	62	34	12	2	23	55	15	31	17	51	3	6	3	37	0	4	6
ENSG00000007933_FMO3	0	1	0	2	0	0	1	0	2	1	0	0	0	0	0	0	0	0	0	0	0	0	0	0	0	0	0	0	0	0	0	0	0	0	0	0	0	0	0	0	0	0	0	0	0	0	0	0	0
ENSG00000007944_MYLIP	143	55	55	84	222	2	109	181	214	168	337	93	52	159	228	219	100	126	110	160	154	58	44	163	236	958	932	475	208	145	382	542	121	152	103	153	82	159	80	39	102	123	194	169	146	130	117	71	180
ENSG00000007952_NOX1	0	0	0	0	0	0	0	0	0	0	0	0	0	0	0	0	0	0	0	0	0	0	0	0	0	0	0	0	0	0	0	0	0	0	0	0	0	0	0	0	1	0	0	0	0	0	0	0	0
ENSG00000007968_E2F2	13	11	33	0	3	5	13	0	17	3	2	13	0	6	13	100	10	10	2	0	1	1	0	19	42	82	317	29	80	37	8	62	7	0	1	3	2	1	0	19	0	0	10	2	5	13	1	1	3
ENSG00000008018_PSMB1	175	333	275	273	202	241	381	129	409	113	401	137	132	161	272	231	267	203	104	175	245	275	167	449	148	1043	646	352	307	349	313	768	306	195	210	219	210	427	222	200	268	234	225	145	288	252	114	170	172
ENSG00000008056_SYN1	0	0	0	0	0	0	0	0	1	0	0	5	0	0	0	0	0	1	0	0	1	0	0	0	0	3	1	3	1	2	0	5	0	0	0	0	0	0	0	0	0	0	0	0	0	0	0	0	0
ENSG00000008083_JARID2	6971	2913	2088	1616	4744	2170	2671	4099	7609	4784	7551	6189	3562	5048	5183	3848	5374	4755	2555	3487	4143	5163	2671	5387	2342	4168	4201	6173	4751	4168	4836	4789	5567	5298	7183	5818	5483	4989	4967	2699	6114	3413	5535	4363	5136	5735	3025	4327	4514
ENSG00000008086_CDKL5	404	472	584	247	578	212	519	364	1027	692	900	581	655	529	715	712	909	361	212	251	594	719	433	910	888	361	1013	1054	1070	561	821	888	481	681	1018	760	271	736	643	254	516	655	559	398	589	538	372	482	685
ENSG00000008118_CAMK1G	0	0	0	0	0	0	0	0	0	0	0	0	0	0	0	0	0	0	0	0	0	0	0	0	0	0	0	0	0	0	0	0	0	0	0	0	0	0	0	0	0	0	0	0	0	0	0	0	0
ENSG00000008128_CDK11A	284	118	384	327	63	139	124	16	515	141	363	55	74	85	197	355	143	57	207	275	130	164	141	619	269	2891	2172	756	343	507	976	1531	379	141	127	218	164	379	144	163	107	207	366	96	162	261	157	96	113
ENSG00000008130_NADK	16	132	177	164	14	22	6	6	63	25	64	15	1	8	33	406	25	33	84	0	14	18	10	284	5	837	2129	954	126	278	266	275	192	12	15	50	13	46	9	21	41	22	54	2	67	69	4	8	7
ENSG00000008196_TFAP2B	0	0	0	0	0	0	0	0	0	0	0	0	0	0	0	0	0	0	0	1	0	0	0	0	0	0	0	0	0	0	0	0	0	0	0	0	0	0	0	0	0	0	0	0	0	0	0	0	0
ENSG00000008197_TFAP2D	0	0	0	0	0	1	0	1	0	0	0	0	0	0	0	0	0	0	0	0	0	0	0	0	0	0	0	0	0	0	0	0	0	0	0	0	0	0	0	0	0	0	0	0	0	0	0	0	0
ENSG00000008226_DLEC1	1	0	23	0	4	3	0	3	65	0	37	0	0	0	11	24	0	0	0	0	5	0	2	8	0	227	113	31	10	50	43	177	23	0	0	5	0	24	2	0	5	0	29	2	19	17	34	0	0
ENSG00000008256_CYTH3	52	23	0	23	6	7	1	4	57	13	26	22	0	38	24	7	6	16	15	5	16	10	6	43	6	133	116	45	37	71	111	105	25	18	77	60	2	53	21	13	9	25	23	43	47	48	3	22	34
ENSG00000008277_ADAM22	42	24	46	1	1	2	39	6	48	12	4	30	0	8	18	35	11	6	0	30	13	19	0	48	44	175	67	15	16	67	43	189	12	17	32	7	8	32	1	6	12	0	56	26	31	9	33	27	15
ENSG00000008282_SYPL1	445	149	205	630	286	341	314	174	325	245	583	187	293	627	320	159	465	289	263	175	233	259	427	445	152	303	387	324	192	199	378	342	246	325	496	319	620	365	201	276	375	197	221	352	414	441	286	295	415
ENSG00000008283_CYB561	0	0	1	2	0	10	0	3	1	0	0	0	0	0	4	0	0	0	0	0	0	0	0	6	0	32	42	9	1	8	15	18	4	0	0	0	7	15	0	0	3	0	2	1	0	2	0	0	0
ENSG00000008294_SPAG9	936	564	725	522	539	359	318	534	1275	879	1128	680	774	897	937	743	1109	1054	313	721	859	915	284	1242	471	2482	4698	1907	1164	1637	1414	1915	1378	1030	1083	1041	1035	1011	946	383	830	692	926	786	831	1323	558	1044	740
ENSG00000008300_CELSR3	3	0	0	0	5	18	0	8	2	0	4	0	0	1	0	0	13	0	0	0	0	5	0	7	0	34	16	2	9	20	35	13	6	0	0	8	0	5	1	0	0	0	2	0	3	3	31	1	0
ENSG00000008311_AASS	69	56	46	3	56	27	57	99	230	267	80	140	92	186	57	100	132	194	49	76	68	178	17	87	101	230	115	54	120	197	164	229	233	107	130	102	145	201	146	61	120	146	213	92	113	95	0	105	98
ENSG00000008323_PLEKHG6	10	0	5	0	0	3	0	0	5	0	0	1	0	0	2	4	0	0	0	0	5	0	0	3	0	15	51	12	10	7	6	16	3	0	0	1	0	3	0	0	0	0	0	1	1	6	0	0	0
ENSG00000008324_SS18L2	13	43	33	0	20	4	0	0	53	0	21	0	0	2	13	17	1	8	16	0	6	2	0	18	0	116	75	46	16	11	59	78	15	4	0	18	5	10	17	2	5	0	0	10	3	21	0	3	5
ENSG00000008382_MPND	24	14	150	13	27	8	25	25	18	2	41	16	13	29	32	28	17	17	0	21	40	13	19	35	65	108	92	25	44	57	17	82	38	15	8	20	30	18	48	42	28	20	34	28	38	20	5	11	13
ENSG00000008394_MGST1	6	2	119	38	3	43	0	0	2	23	24	6	7	4	2	7	2	1	0	0	0	1	3	13	0	10	19	5	16	7	7	12	6	12	5	4	0	11	0	9	0	0	3	1	12	14	5	6	4
ENSG00000008405_CRY1	172	158	158	16	140	72	34	68	256	119	297	74	64	129	114	87	172	94	80	56	101	119	82	193	69	573	254	175	167	180	238	476	132	109	185	171	243	122	80	40	125	81	190	139	70	204	60	127	107
ENSG00000008438_PGLYRP1	0	20	23	29	0	0	0	0	0	0	0	1	0	4	0	101	0	0	22	0	0	0	0	81	39	25	202	37	2	14	6	7	0	0	0	4	0	3	0	0	1	0	6	3	0	5	0	0	0
ENSG00000008441_NFIX	25	25	11	20	5	10	13	0	19	0	40	22	1	4	7	197	12	61	30	19	8	8	0	35	118	87	645	69	158	85	18	119	8	0	5	31	0	2	8	19	8	26	14	1	11	9	36	0	3
ENSG00000008513_ST3GAL1	152	64	73	48	151	28	82	75	396	270	239	126	68	107	133	167	128	108	139	44	78	144	60	188	81	278	197	234	119	190	172	244	127	70	162	64	53	208	68	28	145	164	194	145	122	116	95	106	133
ENSG00000008516_MMP25	0	36	72	73	1	3	5	0	3	3	0	0	0	0	8	139	1	0	40	1	6	3	0	76	0	261	1148	480	36	65	59	16	65	0	1	15	4	4	1	4	3	5	6	0	9	8	6	1	0
ENSG00000008517_IL32	32	253	202	352	85	4	33	191	323	0	593	0	0	5	572	96	35	3	65	188	126	15	75	224	7	2337	677	79	270	684	1230	3506	315	15	0	75	54	835	27	1	221	92	213	13	115	101	15	11	25
ENSG00000008710_PKD1	200	10	40	99	158	184	33	87	832	115	487	136	77	90	298	312	190	73	100	11	124	86	19	434	102	3563	1594	362	404	648	772	1718	378	27	66	72	1	224	47	40	148	70	287	153	161	143	119	82	90
ENSG00000008735_MAPK8IP2	0	0	0	0	0	22	0	0	5	0	0	0	0	0	0	0	0	0	0	0	0	0	0	0	0	7	1	0	0	2	2	0	0	0	0	0	0	0	0	0	0	0	0	0	0	0	0	0	0
ENSG00000008838_MED24	117	73	209	24	39	62	56	62	124	86	220	60	55	62	159	154	127	100	35	48	77	68	28	170	31	557	289	110	187	203	254	434	114	69	138	78	100	111	64	69	85	85	107	60	104	70	98	82	73
ENSG00000008853_RHOBTB2	26	0	22	18	38	7	0	69	113	68	92	37	35	8	60	64	35	11	10	0	63	31	8	59	0	156	89	39	24	50	40	102	18	7	61	24	4	58	5	10	24	7	78	34	4	15	24	40	18
ENSG00000008869_HEATR5B	843	360	1029	500	725	496	513	309	1224	727	1431	597	419	714	941	606	913	762	201	424	646	759	347	1394	156	3039	2084	1053	910	1235	1433	2344	854	883	1234	1107	819	1353	719	324	721	656	917	755	1082	941	544	1051	734
ENSG00000008952_SEC62	814	1119	1669	1126	817	949	544	448	1161	991	1095	833	1075	1260	875	1565	1243	1206	935	1016	1014	870	900	1406	1255	2031	4029	1469	1909	1542	1307	2183	1203	1992	1709	1397	1325	1597	1224	871	1034	1253	1408	865	1162	1233	694	1251	1096
ENSG00000008988_RPS20	2154	6384	7311	7225	1741	4576	6533	1289	3057	1959	3516	1072	2114	3184	1946	2165	3433	2736	5068	4424	2245	2344	4406	3901	1511	9411	4714	2392	3133	3807	4066	6174	3609	2623	1721	2290	3926	2509	2735	4125	2502	3504	2284	2533	3234	2931	1103	2501	2010
ENSG00000009307_CSDE1	16202	11131	7714	6517	18241	6715	13909	10691	28405	13053	26327	15139	13198	17483	13144	17734	25807	20132	8107	5882	22100	17594	7224	15135	9382	11869	14670	12696	19169	20711	15807	14764	27341	20632	17855	15338	24048	18379	23565	6662	14607	13566	28408	21035	21427	18848	8630	24837	21184
ENSG00000009335_UBE3C	741	330	325	304	736	378	250	669	961	713	1462	409	532	734	760	652	968	603	214	267	590	657	275	849	314	1319	1003	822	818	879	824	1241	894	623	779	707	1055	652	783	317	714	319	594	808	826	804	627	667	733
ENSG00000009413_REV3L	254	78	169	81	255	45	46	50	540	525	486	254	223	306	389	489	284	320	91	161	375	380	48	580	115	1356	1236	590	427	598	818	1188	557	324	528	365	305	499	335	147	299	215	472	415	356	469	289	384	305
ENSG00000009694_TENM1	24	25	42	13	26	55	1	3	63	1	28	0	0	0	27	23	0	0	0	0	1	0	0	47	0	378	152	53	21	73	134	290	39	0	0	4	0	43	0	0	17	6	1	0	0	32	1	0	0
ENSG00000009709_PAX7	0	0	0	0	0	0	0	0	0	0	0	0	0	0	0	0	0	0	0	0	0	0	0	0	0	0	0	0	0	0	0	0	0	0	0	0	0	0	0	0	0	0	0	0	0	0	0	0	0
ENSG00000009724_MASP2	2	0	0	0	17	1	0	0	12	1	12	0	0	0	6	3	0	0	0	0	0	0	0	1	0	36	28	5	7	16	24	32	8	0	0	2	0	2	0	0	0	0	0	0	1	1	0	1	1
ENSG00000009765_IYD	0	0	0	0	0	0	0	0	0	0	0	0	0	0	0	0	0	0	0	0	0	0	0	0	0	0	0	0	0	0	0	0	0	0	0	0	0	0	0	0	0	0	0	0	0	0	0	0	0
ENSG00000009780_FAM76A	14	0	17	0	9	1	1	11	26	20	5	27	0	7	24	6	9	5	62	0	5	25	35	26	0	111	45	25	23	65	27	104	28	12	15	32	6	25	7	23	25	9	8	8	18	21	44	34	4
ENSG00000009790_TRAF3IP3	77	96	161	134	61	0	16	4	441	0	227	5	1	5	192	230	5	8	67	10	33	12	35	520	0	2205	1117	293	230	487	965	1505	269	9	1	29	6	207	9	1	71	41	117	6	60	117	11	4	0
ENSG00000009830_POMT2	11	10	78	2	13	4	0	0	9	31	35	28	0	13	15	0	18	24	0	0	38	20	0	31	0	178	93	83	45	62	170	77	21	5	18	17	23	26	1	0	24	0	35	7	31	9	0	23	26
ENSG00000009844_VTA1	503	587	323	420	509	259	296	209	546	249	705	311	222	602	316	187	458	394	223	531	293	351	754	560	30	755	558	349	483	381	578	647	527	558	493	361	670	453	453	408	449	301	423	368	556	444	168	480	397
ENSG00000009950_MLXIPL	0	0	0	0	0	5	0	0	0	0	0	0	0	0	0	0	0	0	0	0	0	0	0	0	0	0	0	1	0	0	0	0	0	0	0	0	0	0	0	0	0	0	0	0	0	0	13	0	0
ENSG00000009954_BAZ1B	447	250	357	192	467	246	335	238	860	486	743	455	303	260	394	533	432	433	122	228	518	556	161	681	132	2563	1454	769	758	883	1342	2103	821	723	628	414	673	808	589	262	431	196	562	496	702	585	324	645	519
ENSG00000010017_RANBP9	3767	2034	2459	1204	4622	2014	2427	1917	6452	7638	4977	5229	3198	5882	4766	3917	5967	6242	2466	2397	5287	5894	2114	5864	2640	3989	4016	5607	6357	4848	4537	5559	6121	8291	10099	6865	6652	11427	7527	1925	5204	3610	6796	5377	6751	7898	4875	7925	6087
ENSG00000010030_ETV7	0	0	1	0	0	0	0	0	0	0	5	0	0	0	0	0	0	0	0	0	0	0	0	3	0	22	21	7	4	1	0	1	0	4	0	0	2	0	0	0	2	0	0	0	0	0	0	0	0
ENSG00000010072_SPRTN	33	43	34	66	21	4	0	1	27	10	100	12	17	15	37	43	28	27	9	9	24	18	6	35	4	181	167	65	29	46	38	133	47	25	37	13	36	42	31	8	26	16	15	18	20	11	38	34	34
ENSG00000010165_METTL13	21	0	1	0	2	8	36	1	51	4	70	14	0	5	17	16	0	0	16	24	20	8	58	58	0	247	143	43	22	60	73	192	33	15	1	26	12	22	7	0	7	26	34	11	7	10	64	3	4
ENSG00000010219_DYRK4	9	1	0	0	18	9	46	0	6	0	68	21	43	49	4	14	8	19	0	0	17	16	18	9	0	50	39	25	32	30	11	28	5	7	6	14	42	20	1	50	15	10	11	21	15	6	16	8	4
ENSG00000010244_ZNF207	3744	2324	1662	1945	3101	1426	1786	1704	4486	2587	4502	2701	3045	2805	2949	2700	3524	3209	1408	1742	3104	2988	1763	4585	2057	5127	4054	3629	2961	3141	4465	5115	2949	3330	3879	3440	4061	3038	3987	2173	2992	1436	4093	2712	3804	3438	1910	3180	3836
ENSG00000010256_UQCRC1	80	74	35	59	97	73	6	65	171	5	145	4	4	35	30	73	65	25	57	22	56	41	105	168	19	621	404	126	105	186	306	353	96	24	30	44	39	53	43	32	47	21	80	52	95	68	67	23	14
ENSG00000010270_STARD3NL	2418	968	724	613	1764	395	1068	1193	2747	1141	4168	998	1325	1740	1158	946	1091	938	390	426	1336	1644	743	1527	947	1124	781	1605	2086	2134	1953	1223	2502	887	1425	1571	1386	782	1912	548	1408	927	2182	1476	2328	1539	376	1172	1101
ENSG00000010278_CD9	12304	8397	9793	7015	8491	5782	9903	3117	15106	6956	14699	4917	6807	13116	8451	3329	8356	12074	5717	9888	6295	11003	5091	8918	3263	5122	3334	6051	11315	9530	6436	6357	15208	14388	12786	6688	15098	9392	16681	7332	11162	7173	6528	12281	16532	10300	3573	7431	8269
ENSG00000010282_HHATL	0	0	0	0	0	0	0	1	0	0	2	0	0	0	12	0	0	0	0	0	0	0	0	0	0	0	0	0	0	0	3	0	0	0	0	5	0	0	0	0	0	0	0	0	0	0	0	0	0
ENSG00000010292_NCAPD2	764	379	127	214	214	211	25	335	628	327	789	62	78	208	416	208	577	236	361	204	483	522	88	577	293	1589	747	630	347	716	684	1230	685	206	383	274	353	499	395	94	420	77	243	325	344	274	310	102	314
ENSG00000010295_IFFO1	4	12	31	2	51	2	37	2	103	0	144	7	0	27	44	111	11	0	27	33	21	6	15	110	14	652	319	102	61	166	218	415	48	13	5	32	22	66	5	8	28	1	58	21	42	26	6	5	10
ENSG00000010310_GIPR	0	0	1	0	0	1	0	1	46	0	0	0	0	0	2	15	0	0	87	0	1	0	0	13	0	99	45	11	1	13	18	70	11	0	0	0	0	9	0	0	2	0	0	0	0	0	0	0	0
ENSG00000010318_PHF7	193	79	51	29	149	147	289	122	329	322	229	153	133	187	193	176	248	227	102	105	231	202	77	235	51	206	136	156	205	199	188	193	224	292	376	242	234	408	277	145	280	174	195	224	272	353	178	244	135
ENSG00000010319_SEMA3G	0	0	0	0	0	0	0	0	3	0	0	0	0	5	0	0	3	5	0	0	0	0	0	8	0	0	5	1	0	1	0	0	0	0	0	0	0	1	0	0	0	0	3	6	0	0	7	0	0
ENSG00000010322_NISCH	102	102	269	17	90	86	4	10	423	52	304	30	95	54	165	149	63	25	24	45	71	75	143	246	9	1429	963	278	138	330	296	863	137	27	92	70	60	162	36	11	74	174	183	95	32	105	121	84	61
ENSG00000010327_STAB1	322	103	417	101	73	51	125	81	264	99	314	190	91	126	162	167	204	98	89	107	150	110	48	154	63	91	448	265	239	708	171	351	187	93	87	182	118	46	187	105	106	109	182	101	180	174	21	117	141
ENSG00000010361_FUZ	79	61	2	59	81	60	44	80	49	50	39	55	7	7	38	67	9	33	50	54	53	33	71	84	0	214	308	104	70	117	81	110	66	21	47	34	70	56	24	101	27	15	31	27	89	10	65	20	41
ENSG00000010379_SLC6A13	0	0	0	0	0	0	0	0	0	0	0	0	0	0	0	0	0	0	0	0	0	0	0	4	0	3	7	1	0	1	0	6	3	0	0	0	0	0	0	0	0	0	0	0	0	0	1	0	0
ENSG00000010404_IDS	6501	2097	2261	1161	4548	2044	2697	3818	9661	5238	7618	6299	4291	6562	4856	4869	6404	6115	2229	2175	5518	5967	1953	3360	2009	5106	5496	6389	6072	6509	5340	6158	6366	5772	7055	6699	5105	5934	6940	2116	5056	4122	6254	5765	5694	6125	3392	6316	6985
ENSG00000010438_PRSS3	0	0	0	0	0	1	0	1	0	0	17	0	0	0	2	0	0	0	0	0	0	0	0	0	0	0	0	0	1	0	0	0	1	0	0	0	0	0	0	0	0	0	0	0	0	0	0	0	0
ENSG00000010539_ZNF200	25	7	47	12	0	3	7	0	58	0	23	0	0	6	16	15	1	0	12	0	3	3	0	52	45	176	205	55	25	34	42	81	16	0	16	7	19	6	0	0	4	0	16	6	0	4	0	0	2
ENSG00000010610_CD4	4	3	27	23	4	1	0	0	4	0	59	15	0	1	0	14	7	0	0	0	0	0	23	86	34	42	381	36	60	77	52	57	5	1	0	11	0	24	0	1	6	0	39	3	9	41	1	13	0
ENSG00000010626_LRRC23	75	0	0	6	74	45	55	6	57	54	135	23	79	24	12	54	36	21	12	46	42	43	55	28	0	50	58	16	67	52	44	37	44	45	38	91	48	21	25	32	34	53	40	44	56	39	9	51	32
ENSG00000010671_BTK	13048	14834	8020	12875	19556	9421	6658	13988	19437	19990	29483	16168	9851	18933	15816	12716	20638	14209	9408	13968	7675	19827	6215	20629	6088	9906	14603	21055	16643	12512	14321	7553	15179	14661	25871	20259	24674	18634	19360	12923	19603	12461	16706	7160	20972	17970	11067	6874	16955
ENSG00000010704_HFE	117	6	11	0	54	33	0	9	55	39	37	99	18	38	100	100	27	27	32	31	54	40	5	61	15	28	49	33	43	38	56	60	24	30	92	90	32	60	28	31	57	34	86	37	37	85	2	72	42
ENSG00000010803_SCMH1	178	82	74	72	206	139	320	409	463	359	204	450	172	418	464	435	309	566	218	246	364	309	143	413	16	318	269	311	214	292	282	309	307	389	406	309	431	447	384	152	259	291	312	369	255	477	463	457	335
ENSG00000010810_FYN	7202	2486	3013	2149	6418	2270	2674	3852	7608	5604	9557	4211	2271	4289	4515	4342	6882	3582	1801	3587	4398	4759	2601	5589	2286	7653	4980	6876	5203	4058	5965	8119	4668	3953	7189	4927	5539	6281	5615	2104	5873	3511	4994	4782	5990	5229	2575	4101	4319
ENSG00000010818_HIVEP2	693	251	134	114	540	180	300	213	1147	658	1155	566	210	364	644	402	582	253	221	295	365	303	105	726	389	1038	1749	1263	491	782	922	780	627	364	505	462	309	685	435	138	293	308	488	340	476	374	357	379	408
ENSG00000010932_FMO1	0	0	0	0	0	0	0	0	0	0	0	0	0	0	0	0	0	0	0	0	0	0	0	0	0	0	0	0	0	0	0	0	0	0	0	0	0	0	0	0	0	0	0	0	0	0	0	0	0
ENSG00000011007_TCEB3	253	91	78	90	183	101	36	239	286	194	417	133	176	171	185	196	312	246	42	133	177	205	117	252	82	618	489	242	208	342	334	525	260	205	154	329	221	221	313	114	173	177	227	254	225	136	83	211	299
ENSG00000011009_LYPLA2	306	84	149	67	105	115	104	136	287	112	349	203	138	69	137	82	171	97	73	88	113	98	85	191	13	398	209	142	164	165	207	261	165	61	103	115	130	105	155	146	116	188	140	125	185	155	36	105	125
ENSG00000011021_CLCN6	25	1	47	1	13	1	3	1	52	26	42	3	0	7	23	19	4	6	0	16	16	15	0	36	0	168	81	30	34	56	75	132	34	4	5	0	19	32	12	0	9	0	31	17	24	5	2	18	23
ENSG00000011028_MRC2	2	16	1	0	0	27	4	14	0	0	2	2	24	11	0	61	0	8	8	1	2	1	0	11	10	23	142	13	26	30	5	20	3	0	4	10	0	8	1	0	1	7	16	0	0	0	1	0	0
ENSG00000011052_NME2	1	11	0	0	0	3	0	0	3	20	1	6	0	0	5	0	0	2	0	0	5	0	0	2	5	12	10	8	0	5	0	0	0	0	0	0	0	0	0	0	0	10	16	0	13	1	18	0	0
ENSG00000011083_SLC6A7	0	0	0	0	0	2	0	0	0	0	0	0	0	0	0	0	0	0	0	0	0	0	0	0	0	0	0	0	0	0	0	0	0	0	0	0	0	0	0	0	0	0	0	0	0	0	0	0	0
ENSG00000011105_TSPAN9	4485	2205	2305	930	3174	1486	2594	2719	6327	2750	5175	3690	2510	2939	3601	3431	4250	2702	1424	2028	2979	3305	1486	2514	1397	1790	1296	3696	4580	3557	2629	2222	3887	3062	3650	3902	2941	3131	5591	1815	2727	2863	4265	3350	3488	3146	1699	2903	3410
ENSG00000011114_BTBD7	597	265	56	174	439	214	214	71	652	297	746	355	380	408	404	272	358	362	178	61	378	423	127	447	148	797	675	510	423	575	544	736	568	418	460	524	467	446	378	169	348	222	410	309	289	526	214	383	408
ENSG00000011132_APBA3	56	31	3	9	30	47	0	17	36	9	42	28	18	20	29	16	18	18	17	31	29	20	1	52	21	153	100	58	55	49	61	136	44	15	21	16	17	21	5	12	20	21	21	29	34	30	6	13	31
ENSG00000011143_MKS1	0	0	69	1	0	3	0	1	100	12	19	11	0	0	0	41	0	7	0	0	6	4	0	43	0	172	84	18	16	47	35	46	13	1	9	12	2	15	0	0	8	8	0	11	14	35	0	0	1
ENSG00000011198_ABHD5	745	620	190	405	679	367	332	417	1110	395	937	607	403	463	393	432	544	614	413	800	647	536	336	631	311	725	1767	992	634	653	712	527	616	755	1548	655	867	604	1006	392	658	317	683	480	810	681	375	487	649
ENSG00000011201_KAL1	3	0	0	1	3	1	0	22	0	13	9	2	0	9	32	0	18	6	3	0	3	24	10	3	0	0	4	1	3	9	6	9	4	11	28	0	4	3	7	0	3	0	0	3	13	33	1	9	4
ENSG00000011243_AKAP8L	393	298	618	286	338	136	149	257	577	77	825	211	266	249	415	428	394	174	395	251	275	230	166	647	140	1749	1464	614	445	573	683	1172	273	118	292	270	461	329	223	200	244	265	418	182	343	210	159	186	247
ENSG00000011258_MBTD1	6827	4614	2864	2657	5109	2623	3584	2588	5369	4954	8753	5632	3677	5760	4438	3747	6194	4237	2119	3799	3615	6152	2565	4900	3205	3207	4312	6844	6301	4863	4289	4622	5103	5349	7407	5698	4153	5020	4891	3434	4645	5817	5920	4913	4609	4965	3751	4140	5905
ENSG00000011260_UTP18	229	349	716	132	238	197	24	151	297	219	496	261	165	217	278	267	316	161	217	168	220	270	102	401	155	572	374	266	268	208	355	507	270	297	345	335	292	350	242	127	223	231	311	259	254	290	152	274	181
ENSG00000011275_RNF216	1261	676	928	498	1243	731	811	660	2257	1945	1472	2019	1068	1731	1573	1279	1421	1249	532	792	1724	1419	1066	2072	608	2076	1787	1440	1318	1491	1582	2046	1486	1859	2245	1690	1756	2771	1935	567	1222	952	2009	1527	2055	2582	1429	2113	1637
ENSG00000011295_TTC19	455	327	226	417	472	232	44	443	528	372	472	542	184	276	636	330	454	181	174	265	377	409	109	457	215	1074	916	625	473	539	462	931	409	983	376	609	237	344	456	276	497	351	584	343	518	460	52	370	189
ENSG00000011304_PTBP1	2643	1369	1472	908	2597	1556	1592	1992	4097	2138	3982	2224	2130	2221	2510	2205	2928	1683	1096	1758	1933	2180	1241	2147	1612	2373	2133	2582	2373	2767	2297	2392	2560	1838	2262	2501	1936	1746	3030	1753	1839	2433	3243	2069	2461	2374	1636	2435	2308
ENSG00000011332_DPF1	0	0	0	0	0	2	0	0	0	0	0	0	0	0	0	0	0	0	0	0	0	0	0	0	0	0	3	1	0	0	0	0	0	0	0	0	0	0	0	0	0	0	0	0	0	0	2	0	0
ENSG00000011347_SYT7	0	0	0	0	0	2	0	1	0	0	0	0	1	1	0	0	7	0	0	0	0	0	0	0	0	0	2	0	0	0	0	0	0	0	0	0	0	0	0	0	0	0	0	3	0	0	3	0	0
ENSG00000011376_LARS2	0	4	1	24	40	11	0	6	73	0	27	0	0	18	31	50	0	6	0	0	29	9	0	20	0	281	169	28	47	60	82	197	35	5	4	4	11	44	7	39	5	0	23	3	7	39	2	5	1
ENSG00000011405_PIK3C2A	1361	704	539	258	756	164	518	534	1052	629	1677	812	631	1094	810	749	1427	825	359	343	811	1029	275	1187	546	1726	1241	1376	1238	1159	1243	1596	1291	1040	1668	940	1510	947	1001	444	878	565	1060	817	878	1287	425	1005	1164
ENSG00000011422_PLAUR	15	37	29	101	44	10	53	1	1	6	22	0	0	1	14	157	6	2	114	21	12	20	0	87	0	193	839	247	71	83	72	24	31	3	1	6	12	24	3	2	4	9	10	0	1	7	15	0	0
ENSG00000011426_ANLN	113	82	73	12	58	58	72	34	205	137	178	158	165	127	189	75	162	152	36	59	183	135	77	147	73	79	192	185	143	153	140	152	164	193	299	179	145	262	128	84	133	131	156	210	142	168	273	237	184
ENSG00000011451_WIZ	12	2	53	0	5	17	2	7	30	30	56	0	0	25	49	95	5	2	0	0	14	7	0	30	0	209	174	38	35	55	81	164	36	6	3	5	6	16	3	5	7	9	4	5	10	4	16	2	5
ENSG00000011454_RABGAP1	3456	1590	1685	1425	2802	1370	2326	2480	3810	3291	4099	3030	2962	4177	3211	2261	3583	4366	1585	2081	3092	4336	1429	3141	1882	3168	2566	3189	3594	3881	3183	3209	3558	4449	5354	3638	4815	4216	3543	1545	3407	2466	3260	3642	3693	4473	3759	3747	3326
ENSG00000011465_DCN	0	6	4	7	2	161	76	2	7	0	0	0	0	0	4	0	0	0	0	0	0	10	0	0	0	0	0	0	7	0	5	0	0	0	13	0	0	0	0	0	0	0	0	0	0	0	0	0	0
ENSG00000011478_QPCTL	5	9	0	8	0	10	0	0	16	0	5	0	0	0	0	0	1	5	0	0	1	3	0	8	0	43	12	14	8	6	3	33	3	0	0	2	0	2	0	0	0	0	0	0	0	0	5	2	0
ENSG00000011485_PPP5C	115	65	136	42	108	71	113	40	340	87	448	45	58	76	212	55	141	105	30	95	114	88	56	207	79	804	346	149	138	283	304	433	213	113	118	192	52	78	134	128	87	182	114	99	118	82	91	71	96
ENSG00000011523_CEP68	968	196	301	52	416	247	133	213	512	424	949	594	236	219	505	286	724	275	314	275	279	311	156	435	51	470	663	315	556	260	306	326	464	400	113	90	115	495	386	277	339	560	388	402	373	379	150	81	202
ENSG00000011566_MAP4K3	138	134	250	102	166	51	16	87	280	290	130	223	204	243	186	201	187	198	96	83	157	201	107	179	107	375	302	172	241	242	266	389	214	247	337	391	174	357	186	91	194	196	238	180	227	234	228	271	133
ENSG00000011590_ZBTB32	0	0	0	0	1	2	0	0	1	0	0	0	0	0	0	0	0	0	0	0	0	0	0	0	0	5	3	0	0	0	0	3	0	0	0	0	0	0	0	0	0	0	1	0	0	0	0	0	0
ENSG00000011600_TYROBP	156	1525	3098	1325	687	338	530	77	1209	56	1840	57	147	96	247	1586	99	115	816	245	386	264	315	2726	25	9007	8811	3227	773	1892	1992	4231	950	187	45	373	189	461	289	95	180	135	483	284	605	637	103	243	300
ENSG00000011638_TMEM159	470	298	386	69	656	246	162	235	953	460	608	503	174	541	199	202	259	372	281	279	412	413	298	490	14	212	265	291	254	257	401	305	264	232	494	317	518	308	386	97	328	270	775	312	303	214	127	857	531
ENSG00000011677_GABRA3	0	0	0	0	0	0	0	0	0	0	0	0	0	0	0	0	0	0	0	0	0	0	0	0	0	0	0	0	0	0	0	0	0	0	0	0	0	0	0	0	4	0	0	0	0	0	0	0	0
ENSG00000012048_BRCA1	313	178	128	86	297	509	355	198	535	609	430	312	212	460	418	270	456	432	173	152	415	411	192	565	103	535	818	555	441	441	496	506	417	563	734	631	547	756	456	185	427	385	602	446	525	656	585	579	446
ENSG00000012061_ERCC1	358	355	205	107	660	276	210	357	451	410	763	256	204	563	363	337	623	324	155	135	437	395	226	573	330	530	590	450	401	410	439	572	340	254	425	426	366	248	376	181	303	354	526	331	545	407	232	389	250
ENSG00000012124_CD22	114	39	102	8	135	97	67	47	175	50	225	426	138	146	211	122	242	132	211	40	159	119	138	162	114	127	329	317	224	272	138	220	167	163	194	539	373	199	187	160	166	116	90	127	219	208	106	152	108
ENSG00000012171_SEMA3B	0	0	0	0	0	12	0	1	0	0	2	0	0	0	0	0	0	0	0	0	0	0	0	0	0	6	4	4	0	3	0	0	0	0	0	0	0	0	0	0	0	0	0	0	0	0	15	0	0
ENSG00000012174_MBTPS2	15	33	0	1	42	61	0	1	21	39	97	5	66	59	47	19	32	24	22	0	47	5	31	108	1	232	177	38	76	68	103	194	33	20	52	55	1	44	33	4	38	0	53	25	24	16	53	44	10
ENSG00000012211_PRICKLE3	6	0	10	0	19	1	0	5	7	0	11	0	12	9	2	0	1	2	0	15	6	3	0	1	0	36	46	9	4	13	9	21	4	7	0	0	0	6	9	0	2	0	4	10	4	9	0	4	6
ENSG00000012223_LTF	46	142	607	1157	15	2	36	0	24	21	2	63	1	69	1	3459	34	4	77	7	0	7	0	3217	26	1207	6954	504	150	1158	138	302	43	10	48	58	0	1	8	2	10	14	0	34	35	16	1	0	20
ENSG00000012232_EXTL3	76	25	64	0	17	31	21	8	166	30	134	34	46	21	54	154	4	18	31	3	58	1	23	287	2	1068	1453	363	114	262	216	708	115	12	10	22	19	56	17	1	40	13	51	19	31	53	45	30	19
ENSG00000012504_NR1H4	0	0	0	0	0	1	0	0	0	0	0	0	0	0	0	0	0	0	0	0	0	0	0	0	0	0	0	0	0	0	0	0	0	0	0	0	0	0	0	0	0	0	0	0	1	0	1	0	0
ENSG00000012660_ELOVL5	515	339	243	413	544	612	344	262	753	676	862	264	355	595	370	636	742	560	440	253	681	548	336	915	242	799	1568	719	354	485	587	772	710	606	734	467	861	589	559	212	498	470	543	750	664	599	332	579	879
ENSG00000012779_ALOX5	8	96	346	284	8	9	1	3	5	9	54	0	1	9	20	748	18	17	298	8	12	11	10	470	0	899	4985	2092	227	603	326	145	297	1	8	30	53	31	0	0	29	24	55	9	47	136	16	28	14
ENSG00000012817_KDM5D	789	524	391	486	801	294	6	726	1026	398	1343	616	0	594	908	789	947	609	188	247	629	619	0	932	276	3	0	1057	2	1844	1891	2846	909	674	550	664	789	644	737	274	642	0	878	559	899	851	496	632	538
ENSG00000012822_CALCOCO1	4039	2447	1585	1149	4057	1727	1828	2385	4623	3239	4804	2739	2086	2624	2956	3216	3538	1805	1851	2799	2139	2745	1878	3070	1465	3277	3110	4057	3431	3542	3085	3030	3376	2394	3631	4675	1977	2727	3151	2244	2684	2854	3897	2958	3113	2593	1344	2962	2743
ENSG00000012963_UBR7	482	160	104	196	463	322	544	261	573	293	642	382	385	300	345	386	451	418	227	197	453	435	315	585	2	1136	841	449	385	569	671	997	499	387	380	291	572	537	398	154	378	348	647	441	384	335	147	393	307
ENSG00000012983_MAP4K5	9300	3316	2874	2363	9028	2121	3513	3125	9193	6312	11049	6877	4408	6427	5850	4879	8465	6183	1551	2414	4992	6617	2213	5193	3428	4739	5490	8650	9273	7920	6162	5779	7267	6886	7996	7606	6946	7691	6502	2583	5807	3795	7961	6010	7108	6433	2997	5569	7164
ENSG00000013016_EHD3	8698	3838	2292	1547	10057	2803	4008	5158	8456	5830	9341	5278	5159	5539	5144	5600	6877	6055	2646	3404	4655	7584	2755	3931	2475	2774	3717	6502	7875	6460	5737	5440	7784	4987	6282	7691	6049	5116	12009	3400	5273	5448	4746	6521	7897	4992	2257	4791	5355
ENSG00000013275_PSMC4	399	209	246	184	329	114	265	199	522	228	471	245	204	192	225	160	328	245	23	143	235	255	176	340	270	761	503	272	306	366	319	453	334	199	268	403	298	190	351	141	276	241	318	198	271	251	119	225	127
ENSG00000013288_MAN2B2	2	47	24	17	49	15	1	25	162	12	102	6	15	37	61	134	25	8	3	0	9	20	1	168	6	713	423	153	66	153	211	460	67	2	2	11	10	26	3	15	13	0	40	8	45	32	1	7	14
ENSG00000013293_SLC7A14	0	0	0	0	0	9	0	1	0	0	0	0	0	0	0	0	0	0	0	0	0	0	0	0	0	0	0	0	0	0	0	0	0	0	0	0	0	0	0	0	0	0	0	0	0	0	0	0	0
ENSG00000013297_CLDN11	0	0	0	0	0	77	0	1	0	0	0	1	0	0	0	0	0	0	0	0	0	0	0	0	0	0	0	2	0	0	0	0	0	0	0	0	0	0	0	0	1	0	0	0	0	0	0	0	0
ENSG00000013306_SLC25A39	791	451	918	359	485	284	343	389	531	247	767	741	346	280	269	8356	637	1108	687	280	337	319	123	590	4108	3593	11006	3508	4015	3425	1347	2761	416	137	164	525	232	219	256	308	202	185	848	195	393	289	111	230	185
ENSG00000013364_MVP	101	388	635	320	177	70	134	104	354	148	374	48	10	35	100	384	43	48	228	57	62	52	66	489	32	2024	2471	896	294	377	586	1074	315	55	68	122	173	124	111	36	54	83	116	69	123	95	59	30	30
ENSG00000013374_NUB1	262	132	165	210	109	9	294	310	368	92	493	77	165	104	140	224	230	120	74	130	147	167	70	331	68	1200	1005	350	196	292	374	755	259	122	124	168	626	262	131	54	152	58	184	124	157	151	159	97	233
ENSG00000013375_PGM3	112	171	125	90	123	45	41	72	164	102	112	55	126	163	106	16	83	106	22	5	82	155	1	34	68	158	175	74	88	118	71	169	137	74	73	50	88	29	104	19	100	41	175	69	57	73	25	77	62
ENSG00000013392_RWDD2A	0	5	0	17	1	37	0	0	0	0	0	1	0	0	2	2	0	0	0	0	0	0	0	2	0	10	9	6	0	4	4	7	0	0	0	5	0	0	1	0	0	0	3	0	1	0	0	0	0
ENSG00000013441_CLK1	1652	875	1115	1113	627	466	209	358	1092	621	1685	533	545	1274	860	713	574	1056	649	459	659	849	536	1633	924	3937	3792	1456	1023	1047	1743	3731	1275	1124	971	1036	1317	1194	604	432	1020	559	1004	755	1028	1247	581	583	824
ENSG00000013503_POLR3B	28	16	153	0	23	30	27	48	76	0	48	20	21	27	13	42	27	34	0	21	26	31	0	80	0	405	210	60	50	83	117	268	49	16	20	45	50	149	40	15	15	78	61	24	85	65	0	31	57
ENSG00000013523_ANGEL1	9	0	26	0	0	13	0	4	55	0	6	1	0	22	1	16	8	11	18	0	3	6	0	14	0	135	52	21	11	24	30	72	16	2	2	18	0	3	1	9	4	4	9	1	11	7	0	1	8
ENSG00000013561_RNF14	682	332	111	135	435	296	296	272	715	282	629	451	239	459	365	655	622	549	320	250	298	444	252	424	324	617	991	476	622	618	457	571	514	366	582	451	374	604	468	344	389	471	505	277	390	438	194	345	321
ENSG00000013563_DNASE1L1	110	15	123	3	200	41	95	191	192	135	209	104	89	90	61	124	97	101	90	49	121	98	78	97	44	113	109	122	117	105	140	128	141	99	144	100	127	76	145	56	119	58	161	160	172	122	55	133	145
ENSG00000013573_DDX11	27	2	81	3	0	11	4	4	98	7	98	14	4	12	5	109	0	7	0	0	18	5	0	73	0	1295	507	220	33	79	118	949	92	0	0	0	8	110	48	0	14	0	34	9	7	60	11	2	2
ENSG00000013583_HEBP1	208	201	85	32	262	87	96	108	335	37	135	57	134	63	33	245	65	209	72	113	34	24	155	99	60	59	77	54	84	72	73	45	67	101	57	398	55	201	466	36	33	59	48	53	54	122	36	129	185
ENSG00000013588_GPRC5A	0	0	0	0	0	29	0	2	0	0	0	0	0	0	2	0	0	0	0	0	0	3	0	0	0	0	0	0	0	0	9	0	0	0	0	0	0	0	0	0	0	0	0	0	0	1	17	0	0
ENSG00000013619_MAMLD1	26	4	2	1	10	4	72	12	39	110	45	4	20	3	23	37	17	46	20	0	28	2	51	17	3	40	61	32	46	43	36	89	10	19	8	50	19	2	4	7	22	20	3	18	1	25	0	85	1
ENSG00000013725_CD6	75	43	3	23	69	14	21	13	119	3	62	0	47	14	80	27	13	0	23	145	30	7	2	122	0	738	153	21	71	64	610	843	65	7	93	22	32	57	20	18	34	9	28	5	68	19	0	20	94
ENSG00000013810_TACC3	2642	933	775	750	3166	1063	1178	1415	2200	1450	3715	1261	922	1290	1408	1159	1663	1049	865	1433	1328	1473	1601	1549	816	1271	2404	2321	1676	1574	2055	1278	1189	1131	2278	2109	1418	1752	1482	1020	1367	1510	1732	1526	1746	1563	928	1034	1094
ENSG00000014123_UFL1	30	146	24	44	44	31	2	7	154	16	102	27	12	27	50	36	35	19	0	0	27	23	0	110	12	599	316	90	80	105	236	303	88	25	26	1	26	76	13	8	31	29	64	16	36	52	16	30	22
ENSG00000014138_POLA2	46	34	66	52	25	13	24	2	80	12	73	12	22	25	66	50	55	36	0	0	29	28	4	55	0	206	181	56	61	65	100	178	55	38	13	8	16	36	29	35	36	7	46	33	45	52	16	13	16
ENSG00000014164_ZC3H3	31	17	19	21	38	10	1	15	77	16	79	19	10	45	36	77	25	12	52	13	18	16	11	66	8	290	372	95	40	65	114	145	29	16	10	46	24	33	28	27	21	30	38	35	44	23	28	20	27
ENSG00000014216_CAPN1	22618	11244	8326	3951	20544	5856	9327	23785	36940	19821	37192	15284	18598	16265	14128	15014	23524	20077	7910	12397	17002	18657	10101	13219	12999	8500	13651	19888	15274	18837	17514	13233	23811	14405	14828	22650	19987	13290	23103	10423	16255	14221	27342	16323	23077	15964	8954	21730	14578
ENSG00000014257_ACPP	0	11	77	0	0	1	0	1	7	0	5	0	0	0	0	60	0	1	81	0	0	1	0	41	0	80	570	109	25	146	38	41	14	0	0	8	7	3	0	10	7	0	3	6	2	17	0	0	9
ENSG00000014641_MDH1	70	61	172	125	29	161	176	88	213	75	102	24	89	132	93	63	102	104	190	17	97	137	61	292	129	853	430	99	177	274	290	574	162	97	89	83	187	127	94	48	173	72	139	132	226	142	3	85	65
ENSG00000014824_SLC30A9	622	960	591	554	592	418	486	174	1238	491	722	492	330	596	499	481	907	751	263	185	669	558	244	611	516	946	566	500	902	685	728	791	993	689	695	588	552	650	752	427	506	390	776	601	763	638	239	590	454
ENSG00000014914_MTMR11	26	2	34	3	0	3	11	40	9	2	12	5	1	28	10	2	0	3	0	0	0	3	0	1	6	7	26	21	9	13	15	33	14	0	5	0	8	7	4	0	5	15	9	1	17	1	0	4	0
ENSG00000014919_COX15	64	1	92	44	71	33	10	26	137	42	84	11	80	34	41	87	64	64	0	19	43	26	27	137	39	340	292	119	61	104	139	271	85	26	49	63	56	80	26	24	69	37	122	42	88	67	0	26	37
ENSG00000015133_CCDC88C	1869	731	772	430	1815	634	744	1427	3292	1749	3029	1377	984	1323	2097	1861	2083	1084	752	1030	1364	1620	1210	2055	567	7610	3544	2723	2135	2353	3079	6004	1881	1351	1811	2171	1023	2149	1453	675	1239	2672	2725	1239	1753	1574	940	1273	1238
ENSG00000015153_YAF2	218	131	117	59	104	143	114	47	178	66	321	171	71	170	125	90	166	165	90	133	121	125	102	149	0	322	173	252	179	189	128	223	128	228	130	119	205	130	118	58	102	99	195	119	173	99	57	160	174
ENSG00000015171_ZMYND11	1633	631	640	386	1073	868	1055	1111	1927	1197	2182	1163	1326	1903	1224	1286	1760	1364	612	696	1848	1201	793	1093	637	1657	1193	1203	1363	1243	1556	1535	1909	2175	1688	1418	2405	1393	1624	665	1341	1113	1600	1495	1526	1526	1525	1842	1622
ENSG00000015285_WAS	298	269	327	348	294	39	272	274	672	205	613	169	332	274	341	551	432	219	473	87	218	271	46	505	123	1817	3005	1110	413	677	756	987	600	267	247	241	383	212	408	157	262	181	338	248	375	320	176	242	128
ENSG00000015413_DPEP1	0	0	0	0	0	1	0	0	0	0	0	0	0	0	0	0	0	0	0	0	0	0	24	0	0	0	0	0	0	0	0	0	0	0	0	0	0	0	0	0	0	0	0	0	0	0	0	0	0
ENSG00000015475_BID	445	154	250	154	285	106	77	141	203	156	531	203	240	392	224	143	396	133	156	121	153	253	108	251	171	296	440	300	331	219	354	236	191	141	341	183	212	212	256	159	345	290	206	273	314	263	119	187	259
ENSG00000015479_MATR3	11165	7516	4103	4580	8757	3538	5691	8075	10442	6893	16538	7917	9394	10642	8674	9467	15481	11176	3105	5400	9905	12001	3955	10916	5683	12447	10977	10411	14472	13528	11098	14268	13130	12852	11757	11087	14310	11453	13229	5234	9561	8211	11974	11376	13282	11299	4611	10001	11542
ENSG00000015520_NPC1L1	0	6	0	0	22	1	0	0	3	0	3	0	0	0	7	0	0	0	0	0	2	0	0	0	10	0	0	0	2	2	0	0	0	0	0	17	0	0	4	0	12	0	0	0	0	9	0	0	3
ENSG00000015532_XYLT2	775	320	167	90	841	313	280	625	1079	448	992	417	725	568	780	637	497	600	485	363	707	602	130	344	346	621	256	539	662	790	724	539	1212	552	449	498	836	341	779	267	658	308	732	456	859	719	399	614	439
ENSG00000015568_RGPD5	1179	33	406	304	852	600	4	1	347	1821	1260	1151	46	2974	1138	1485	197	1793	404	267	310	854	0	2076	111	3647	1773	1259	1449	1053	227	1578	2014	1410	1741	2199	1561	2560	998	177	1088	31	2006	343	2608	2001	1749	880	524
ENSG00000015592_STMN4	0	0	0	0	0	0	0	0	0	0	7	0	9	5	0	0	0	2	0	0	2	0	0	4	0	2	11	6	4	1	2	2	3	4	13	4	11	0	0	12	8	0	0	3	0	0	1	0	16
ENSG00000015676_NUDCD3	48	10	36	3	27	78	25	6	113	16	48	10	11	36	49	38	15	15	8	23	20	29	13	69	10	189	110	25	35	72	77	106	35	40	20	34	19	25	28	37	21	25	34	28	56	14	24	29	30
ENSG00000016082_ISL1	0	0	0	0	0	1	0	0	0	0	0	0	0	0	0	0	0	0	0	0	0	0	0	0	0	0	0	0	0	0	0	0	0	0	0	0	0	0	0	0	0	0	0	0	0	0	0	0	0
ENSG00000016391_CHDH	0	0	0	0	0	2	0	0	0	0	0	0	0	0	0	0	0	0	0	0	0	0	0	0	0	0	0	0	0	0	0	0	0	0	1	0	0	0	0	0	0	0	0	0	0	2	1	0	4
ENSG00000016402_IL20RA	0	0	0	0	0	3	0	0	0	0	0	0	0	0	0	0	0	0	0	0	0	3	0	0	0	0	0	0	0	0	0	0	0	0	0	0	0	0	0	0	0	0	0	0	0	0	0	0	0
ENSG00000016490_CLCA1	150	44	57	92	0	271	18	0	0	0	0	1	0	0	0	0	3	0	0	0	0	0	0	0	0	0	0	0	0	0	0	1	0	2	0	0	0	0	0	0	0	0	4	0	0	0	0	0	0
ENSG00000016602_CLCA4	3	0	0	0	0	0	0	0	0	0	0	0	0	0	0	0	0	0	0	0	0	0	0	1	0	0	0	0	0	1	0	0	0	0	0	0	0	0	0	0	0	0	0	0	0	0	0	0	0
ENSG00000016864_GLT8D1	131	272	204	129	93	98	16	18	151	60	254	51	79	121	86	118	170	72	38	59	114	69	73	206	64	497	256	146	195	143	183	379	129	105	195	165	121	121	95	21	158	66	92	122	137	119	59	76	83
ENSG00000017260_ATP2C1	20827	10016	5746	7324	15153	5976	6958	13016	16946	13359	23137	10610	11333	12478	11013	9327	17722	10615	5243	6934	13975	12558	4792	15682	5685	10905	8394	14330	16956	15097	11926	14644	18743	11009	15158	14267	23949	11369	14155	6577	16231	4477	13330	12378	16231	16725	5430	11280	11943
ENSG00000017373_SRCIN1	0	0	0	0	0	1	0	2	4	0	0	0	0	0	1	0	0	0	0	0	0	0	0	0	0	7	0	0	0	0	0	1	0	0	0	0	0	0	0	0	0	0	0	0	0	0	0	0	0
ENSG00000017427_IGF1	0	0	0	0	0	0	0	0	0	0	0	0	0	0	0	0	0	0	0	0	0	0	0	0	0	0	0	0	0	1	0	0	0	0	0	0	0	0	0	0	0	0	0	0	0	0	0	0	0
ENSG00000017483_SLC38A5	239	103	80	31	141	54	69	109	233	80	119	138	173	89	69	570	113	176	50	8	106	81	11	107	204	218	507	152	197	163	125	168	137	34	45	58	151	48	102	28	56	44	97	61	132	56	21	164	85
ENSG00000017621_MAGIX	60	12	62	0	32	38	12	46	38	6	30	36	29	41	37	29	16	21	17	33	35	22	43	27	13	31	22	26	46	17	35	36	31	26	38	79	58	23	64	45	27	44	18	30	31	58	4	27	20
ENSG00000017797_RALBP1	905	445	538	200	716	361	260	681	1064	786	1192	633	505	653	807	853	1034	747	413	532	552	772	526	865	484	1090	1724	1220	908	963	982	949	896	744	889	832	957	1019	1039	469	866	760	1009	771	1110	665	382	798	798
ENSG00000018189_RUFY3	40	48	62	3	42	23	0	48	102	23	154	21	55	9	15	53	10	33	0	5	23	24	7	57	0	279	350	55	79	77	111	220	19	28	19	42	4	28	10	24	30	24	99	14	51	55	32	30	23
ENSG00000018236_CNTN1	0	0	1	0	0	1	0	0	1	0	0	0	0	0	0	0	0	0	0	0	0	6	0	0	0	0	0	0	0	0	0	0	0	0	0	0	0	0	0	0	0	0	0	0	0	0	17	1	0
ENSG00000018280_SLC11A1	0	93	252	236	10	3	53	1	25	35	24	1	0	3	17	475	12	1	182	3	22	2	28	267	0	678	3813	1646	142	396	222	103	283	0	3	41	7	19	6	9	12	10	10	9	63	81	14	1	14
ENSG00000018408_WWTR1	0	0	0	0	0	36	0	4	7	15	8	0	0	0	3	0	0	2	0	10	1	3	25	0	2	2	5	2	3	0	0	3	9	4	0	2	0	6	3	0	0	0	1	0	0	0	6	10	0
ENSG00000018510_AGPS	652	312	433	264	531	143	225	251	908	259	782	435	502	477	560	462	765	527	276	433	434	540	505	733	287	1426	1083	416	542	842	730	1190	838	539	661	642	549	739	657	426	727	459	577	393	624	586	531	632	642
ENSG00000018607_ZNF806	0	0	0	0	0	1	0	0	0	0	0	0	0	0	0	0	0	0	0	0	0	0	0	0	0	0	0	0	0	0	0	0	0	0	0	0	0	0	0	0	0	0	0	0	0	0	0	0	0
ENSG00000018610_CXorf56	13	65	1	0	2	11	0	23	62	27	45	10	40	41	63	23	63	19	1	9	19	11	0	49	0	218	183	42	25	68	110	181	34	14	27	42	30	48	22	42	3	19	65	20	10	43	42	15	53
ENSG00000018625_ATP1A2	0	0	0	0	0	2	0	1	0	0	0	0	0	0	0	0	0	0	0	0	0	0	0	0	0	0	18	1	0	0	0	0	0	0	0	0	0	0	0	0	0	0	0	0	0	0	0	1	0
ENSG00000018699_TTC27	1440	786	841	570	1838	1407	722	853	3124	2529	1399	2091	1250	1923	1996	1052	2355	2242	1146	1585	1821	1758	1372	2151	453	1710	1070	1708	1734	1860	1856	2003	2085	3562	3849	2651	2299	5326	2702	1366	2236	1587	2178	1366	2482	2657	2255	2568	2439
ENSG00000018869_ZNF582	63	57	31	0	9	2	5	21	64	100	69	32	51	54	27	30	61	31	3	16	44	41	15	78	8	85	47	30	49	44	88	88	34	44	60	57	109	81	84	4	50	90	52	54	89	27	6	24	45
ENSG00000019102_VSIG2	209	41	28	37	150	34	33	245	368	240	231	238	162	145	181	196	248	215	42	15	158	153	32	103	75	58	47	149	166	144	143	108	208	166	180	230	166	236	189	71	157	88	224	173	170	173	89	137	197
ENSG00000019144_PHLDB1	0	0	1	0	0	24	12	8	12	0	12	9	0	0	14	1	11	2	0	1	7	10	0	12	0	13	6	1	17	3	0	5	8	9	5	0	16	0	2	0	11	0	0	7	3	8	42	13	7
ENSG00000019169_MARCO	2	0	7	0	0	0	0	0	0	0	0	0	0	0	0	0	0	0	0	0	0	0	0	13	0	0	16	1	0	4	0	16	2	0	0	0	0	0	0	0	0	0	0	0	0	0	0	0	0
ENSG00000019186_CYP24A1	0	0	2	0	0	4	0	0	1	0	0	0	0	0	0	0	0	0	0	0	0	34	0	0	139	0	0	0	0	0	3	0	0	0	0	0	0	0	0	0	0	0	0	0	0	0	68	0	1
ENSG00000019485_PRDM11	13	5	1	8	40	24	4	23	19	61	50	6	26	13	34	0	20	4	6	9	31	22	2	20	0	58	37	34	11	20	53	51	21	14	19	14	5	24	7	12	27	28	24	30	17	41	16	8	4
ENSG00000019505_SYT13	0	0	0	0	0	2	0	0	0	0	0	0	0	0	0	0	0	0	0	0	0	0	0	0	0	0	0	0	0	0	0	0	0	0	0	0	0	0	0	0	0	0	0	0	0	0	0	0	0
ENSG00000019549_SNAI2	4	2	1	0	0	0	0	2	2	0	0	0	0	0	0	0	0	0	0	0	0	0	0	0	0	0	0	0	0	0	0	0	0	0	0	0	13	0	0	0	0	0	0	0	0	0	0	0	0
ENSG00000019582_CD74	839	1439	2511	827	919	1114	1110	684	1751	863	2035	738	663	874	766	931	882	570	1208	814	997	1137	791	1458	562	2734	5794	1935	1786	2360	2681	2861	1030	1045	1146	1435	655	978	925	557	742	860	1385	1161	1213	1319	1075	1260	1208
ENSG00000019991_HGF	11	29	1	1	0	72	0	5	1	0	64	0	0	25	1	0	0	3	0	0	0	14	0	45	0	15	82	17	20	22	10	29	13	9	17	0	0	6	2	0	9	0	23	5	0	0	1	1	3
ENSG00000019995_ZRANB1	803	239	276	180	513	183	375	199	844	626	862	461	318	421	425	818	447	573	179	184	442	454	269	781	334	1424	1694	915	808	904	773	1025	548	380	718	633	511	447	622	110	417	144	675	515	601	479	289	474	367
ENSG00000020129_NCDN	1	13	7	7	8	24	0	11	15	0	0	1	4	5	15	12	0	6	0	2	8	1	0	14	0	71	32	10	18	22	27	57	9	7	4	2	1	5	11	0	3	7	7	2	3	8	0	3	0
ENSG00000020181_GPR124	12	8	0	0	0	4	0	1	11	0	1	0	0	0	4	8	0	0	0	0	2	0	0	1	30	36	12	0	1	5	0	15	1	0	8	0	0	0	0	0	0	0	0	0	0	0	0	0	0
ENSG00000020219_CCT8L1P	0	0	18	0	0	5	0	1	5	0	0	0	0	0	0	0	0	0	0	0	0	3	0	2	0	0	0	4	0	0	0	3	1	0	0	0	0	12	0	0	0	3	1	0	9	0	1	0	0
ENSG00000020256_ZFP64	30	20	4	1	27	4	4	15	74	3	44	12	38	21	34	25	21	0	42	53	13	11	33	62	0	271	98	30	15	37	37	158	28	4	0	26	6	30	35	0	10	16	20	7	17	46	3	3	8
ENSG00000020426_MNAT1	51	35	30	60	57	25	1	78	80	66	65	55	63	45	100	110	78	111	0	77	89	75	53	120	102	289	152	88	98	88	107	257	107	110	140	106	84	157	102	23	89	56	95	72	66	90	35	115	70
ENSG00000020577_SAMD4A	52	155	54	81	51	347	48	25	54	83	53	105	33	97	93	203	77	52	91	151	48	62	78	177	1	42	64	83	119	71	123	70	44	146	199	55	44	44	117	99	40	115	83	80	124	131	25	149	116
ENSG00000020633_RUNX3	22	28	46	27	71	2	6	51	364	0	203	1	1	5	104	64	17	0	22	0	39	2	10	218	0	1697	341	92	104	201	441	895	143	0	7	28	6	116	10	6	33	0	50	12	28	41	0	0	7
ENSG00000020922_MRE11A	478	366	320	246	253	379	315	115	597	537	737	264	310	298	458	352	568	543	147	245	334	467	218	598	154	1678	1091	631	557	877	706	1221	642	512	619	351	581	774	377	284	390	511	495	409	410	567	182	477	503
ENSG00000021300_PLEKHB1	7	13	5	0	12	3	0	3	14	13	18	0	6	0	10	0	12	1	0	0	1	3	0	17	0	7	14	6	12	11	21	3	3	5	4	0	0	4	11	0	12	0	7	7	0	3	3	12	3
ENSG00000021355_SERPINB1	7588	6933	5515	6151	7033	4246	5858	3337	7989	5179	8477	5826	3459	6290	5402	3852	6354	5224	4065	5439	5287	7124	4743	5945	3045	4810	5331	6305	4958	4091	5943	6450	5882	6992	8984	7446	6311	6311	7803	4717	6288	5951	7097	6534	6406	8969	3345	6312	8490
ENSG00000021461_CYP3A43	0	0	0	0	0	0	0	0	0	0	0	0	0	0	0	0	0	0	0	0	0	0	0	0	0	0	0	0	0	0	0	0	0	0	0	0	0	0	0	0	0	0	0	0	0	0	0	0	0
ENSG00000021488_SLC7A9	0	0	0	0	0	2	0	0	0	0	0	0	0	2	0	0	0	0	0	0	12	0	0	3	0	7	1	0	0	0	0	1	1	0	0	0	0	0	0	0	5	0	0	0	0	0	0	0	0
ENSG00000021574_SPAST	1528	1162	1073	681	1476	415	770	1055	1960	1272	1568	1169	945	1248	1339	797	1364	1213	1040	901	1052	1572	430	1396	694	1491	1517	1536	1496	1345	1419	1565	1389	1444	1734	1751	1898	1723	1444	875	1260	518	1601	1119	1697	1586	861	1230	1577
ENSG00000021645_NRXN3	0	0	1	0	0	4	0	1	0	17	0	0	0	0	0	0	0	0	0	0	0	0	0	0	0	3	12	7	7	4	0	1	0	0	0	6	0	0	0	0	0	0	6	0	0	0	1	0	0
ENSG00000021762_OSBPL5	20	9	231	21	101	7	1	2	433	2	188	10	0	0	125	202	2	0	51	14	39	2	27	280	7	1825	738	126	96	216	730	931	159	0	1	3	0	144	6	0	28	2	98	6	48	18	1	5	1
ENSG00000021776_AQR	377	315	182	231	427	260	209	86	726	505	909	403	207	450	337	427	649	515	105	290	383	527	258	776	192	1623	1219	728	807	750	804	1470	621	394	555	582	774	861	625	145	425	251	650	526	511	581	415	571	507
ENSG00000021826_CPS1	3	0	1	1	0	19	1	0	1	0	15	0	29	0	0	0	0	0	0	0	7	0	0	3	27	18	0	4	0	1	4	4	3	0	10	1	0	1	0	0	0	0	11	0	0	13	78	6	0
ENSG00000021852_C8B	0	0	0	0	0	0	0	0	0	0	0	0	0	0	0	0	0	0	0	0	0	0	0	0	0	0	0	0	0	0	0	0	0	0	0	0	0	0	0	0	0	0	0	0	0	0	0	0	0
ENSG00000022267_FHL1	15050	11944	8072	8075	19430	14825	17139	11223	27447	13830	20792	12727	11768	11570	12241	15534	15701	15040	10857	4886	20580	14212	7727	10893	8862	5194	8457	12285	13620	8347	11606	12421	18486	15121	11046	12816	16345	9092	26245	4576	8833	7235	17809	21454	19496	16184	7583	17711	13400
ENSG00000022277_RTFDC1	1297	1009	867	530	1306	1051	761	1294	1765	636	1731	943	1466	922	1187	1000	1159	1295	916	1105	1179	1108	664	1198	728	1757	2200	1369	1217	1288	1287	1219	1504	1138	958	920	1920	1094	1385	868	977	1048	1299	1381	1364	1266	446	1239	1164
ENSG00000022355_GABRA1	0	0	0	0	0	0	0	1	0	0	0	0	0	0	0	0	0	0	0	0	1	0	0	0	0	0	5	0	0	0	0	0	0	0	0	0	0	0	0	0	0	0	0	0	0	0	0	19	0
ENSG00000022556_NLRP2	9	41	173	2	0	31	0	1	59	19	57	0	0	0	47	15	0	0	0	0	31	0	0	101	4	595	187	99	52	257	199	591	96	0	0	0	0	108	0	0	0	52	13	1	12	6	6	0	0
ENSG00000022567_SLC45A4	257	123	58	92	285	68	66	164	346	239	292	266	118	137	141	223	140	150	70	46	156	177	14	255	78	275	672	445	221	207	245	202	259	141	228	163	271	143	180	91	143	93	320	130	143	245	137	212	170
ENSG00000022840_RNF10	6477	3151	2474	1283	5589	1442	2909	5455	11420	4984	10532	5391	4902	4334	4730	9889	7451	4881	2290	2170	4772	4485	2244	4262	3977	5466	13515	7474	8709	9116	4973	5407	6639	3954	4420	5123	4661	3479	6535	1834	3896	4208	7277	4952	5614	3896	3058	5213	5464
ENSG00000022976_ZNF839	28	10	26	7	7	29	6	0	28	11	37	9	8	1	3	28	0	9	0	9	6	14	19	19	19	168	179	63	27	58	42	114	30	3	2	8	15	16	6	0	8	0	16	10	10	7	1	8	21
ENSG00000023041_ZDHHC6	11	11	28	80	10	5	0	4	35	0	30	0	0	0	47	35	18	8	15	5	14	4	1	75	40	337	265	65	47	101	129	324	55	2	1	10	14	36	6	0	19	0	42	11	28	13	0	7	10
ENSG00000023171_GRAMD1B	15	0	41	0	0	0	0	0	43	0	35	0	0	3	5	15	0	0	0	2	0	14	0	8	4	70	194	26	10	22	55	58	9	4	3	15	3	13	0	0	0	0	2	0	0	0	0	1	0
ENSG00000023191_RNH1	569	231	260	113	863	354	270	541	735	304	1041	195	250	261	339	357	286	240	237	128	476	280	190	389	135	448	428	415	415	396	360	420	474	293	209	406	362	347	385	176	188	214	497	334	433	347	141	386	467
ENSG00000023228_NDUFS1	1275	692	313	536	1098	372	581	779	1200	532	1097	842	655	798	879	614	1170	836	550	474	885	888	423	1100	221	1712	1248	886	1175	976	1223	1480	1172	955	1079	726	1073	867	788	431	908	599	1121	832	952	967	678	895	960
ENSG00000023287_RB1CC1	857	389	354	423	488	168	287	247	1004	300	1320	513	281	570	725	638	839	365	277	131	472	637	65	932	215	2402	3051	1375	971	1102	992	1692	906	551	479	633	845	531	367	213	686	349	708	467	731	526	194	397	441
ENSG00000023318_ERP44	604	454	302	307	497	71	394	199	536	220	908	308	468	582	281	365	492	306	111	116	470	512	105	606	552	1059	1126	525	445	500	575	841	609	503	418	362	936	494	556	172	399	214	365	363	515	618	119	427	395
ENSG00000023330_ALAS1	5	21	262	104	67	38	29	10	115	55	90	22	34	53	109	115	83	40	3	34	83	69	70	165	0	344	475	134	105	128	192	273	93	81	58	57	99	113	84	24	68	40	92	69	105	83	47	86	102
ENSG00000023445_BIRC3	27	57	3	5	9	6	15	3	43	0	134	1	0	29	19	14	5	9	26	0	5	24	0	65	0	318	200	37	100	95	144	364	63	6	4	13	0	39	3	6	10	0	39	8	21	4	12	12	0
ENSG00000023516_AKAP11	336	385	217	112	371	187	137	283	778	169	530	238	377	540	379	303	526	792	50	125	306	284	148	391	154	1365	769	361	509	598	522	1157	557	480	445	327	513	467	768	137	543	295	584	311	226	496	168	598	486
ENSG00000023572_GLRX2	3	0	19	1	0	4	0	0	17	0	19	1	0	5	13	13	3	8	24	3	6	9	0	12	0	32	28	8	11	16	24	34	10	6	4	11	12	17	7	24	2	8	8	12	4	2	0	6	5
ENSG00000023608_SNAPC1	4	0	38	0	6	3	0	3	13	15	11	0	3	4	16	18	22	8	17	12	20	14	0	36	0	57	24	21	8	27	21	27	37	32	24	19	15	12	9	0	18	2	5	18	28	23	7	31	13
ENSG00000023697_DERA	3550	3280	1380	1803	3902	1403	2157	1869	4704	1967	5138	2824	1659	1316	1986	1853	2874	2397	1482	1876	2044	2120	2184	2605	1739	1394	2043	2829	2389	1572	2361	2203	2165	3268	2955	2498	2526	2416	3019	1543	2358	1778	3426	2148	2678	2474	1710	2494	2564
ENSG00000023734_STRAP	2849	2523	1722	1206	3562	1428	2407	1939	4438	2289	4862	2222	1752	1836	2223	2487	3842	2965	1131	1341	2224	2208	1956	2182	1436	2148	2596	2987	3012	3569	2961	2173	2920	3943	2198	2521	3129	2383	3255	1622	1833	1825	3206	2520	3264	2199	1266	2247	2808
ENSG00000023839_ABCC2	0	31	0	0	0	0	0	0	29	0	8	0	0	0	40	63	0	0	0	0	1	13	0	17	43	172	171	57	18	31	7	118	11	5	0	0	0	17	11	0	2	0	0	8	0	8	99	1	0
ENSG00000023892_DEF6	34	140	49	310	90	4	24	4	304	45	210	5	19	31	131	177	5	3	77	1	39	4	0	357	0	1529	1173	256	88	322	506	822	132	0	1	12	13	127	14	2	36	59	87	4	44	49	11	6	2
ENSG00000023902_PLEKHO1	10039	6298	5756	3111	11709	5837	7422	9127	13384	7848	12301	8797	6795	6953	7569	6914	8855	6916	6402	8987	6361	7431	6334	6793	4023	5633	5582	10935	7912	7749	7399	6601	7195	7465	9845	10001	10726	6768	9840	5303	6044	9213	10423	7357	8936	7008	4566	6667	6972
ENSG00000023909_GCLM	2047	735	643	665	1732	653	581	886	3067	1540	2577	1898	1403	2340	1373	1492	3430	1975	863	528	2167	1798	778	1903	681	1624	1161	2654	1680	1612	1951	2030	2509	2060	2561	2543	3445	2116	2474	527	2075	1049	2592	2063	2426	3070	1365	2033	2263
ENSG00000024048_UBR2	2096	701	1055	1187	1889	590	507	1452	2426	1334	3370	1488	1012	1154	1614	1881	1643	1166	707	726	1377	1558	501	2872	867	5281	10466	4178	2101	2554	2738	3689	2015	1588	1981	1874	1840	1902	1662	713	1333	889	2241	1297	1756	1760	656	1267	1458
ENSG00000024422_EHD2	327	114	399	227	280	308	431	322	442	338	174	168	163	297	170	266	239	256	226	290	180	224	124	245	137	146	79	158	228	151	215	183	257	228	258	223	284	159	335	144	248	325	286	299	194	172	160	198	295
ENSG00000024526_DEPDC1	31	50	0	40	26	3	37	14	27	37	10	32	26	61	21	6	42	17	0	55	56	96	29	43	56	42	33	23	31	42	37	57	39	65	91	14	57	20	37	13	30	24	5	51	88	76	0	10	38
ENSG00000024862_CCDC28A	472	251	521	264	221	199	103	128	369	200	629	318	56	299	200	208	347	156	118	150	184	187	51	405	339	429	519	353	287	202	278	354	211	242	240	240	208	226	320	247	251	202	206	284	250	204	145	223	269
ENSG00000025039_RRAGD	33	21	6	14	40	4	13	34	81	51	74	18	1	4	45	52	13	10	6	24	20	19	57	56	81	35	285	146	50	48	65	40	32	70	45	47	4	51	7	18	16	84	41	37	21	23	44	13	7
ENSG00000025156_HSF2	44	74	60	0	10	5	0	0	61	4	48	24	1	23	26	17	13	25	0	0	18	27	0	58	0	242	125	28	38	79	100	212	27	25	29	19	0	30	7	8	17	53	64	30	15	43	23	24	30
ENSG00000025293_PHF20	557	286	537	483	604	625	276	382	932	669	861	597	468	530	685	413	636	621	266	281	609	565	190	785	457	1285	1235	872	674	691	786	1067	771	721	851	841	634	1057	675	214	592	412	715	568	635	972	818	764	514
ENSG00000025423_HSD17B6	0	0	0	0	0	0	0	0	0	0	0	0	0	0	0	0	0	0	0	0	0	1	0	0	0	9	0	0	1	0	0	1	0	4	0	0	0	0	0	0	0	22	0	0	3	0	0	0	1
ENSG00000025434_NR1H3	2	10	5	0	4	3	0	0	32	1	14	0	3	0	0	4	8	3	16	21	3	2	0	22	0	51	43	15	3	13	14	30	6	6	2	0	0	4	3	0	1	0	4	0	1	23	24	0	8
ENSG00000025708_TYMP	255	96	344	201	231	45	76	261	213	87	461	80	113	229	118	162	255	120	113	112	144	197	99	286	54	525	965	887	349	259	265	298	393	84	99	165	422	54	193	85	206	71	108	201	199	133	66	122	71
ENSG00000025770_NCAPH2	36	37	21	22	26	15	50	5	123	47	63	6	38	8	10	28	3	8	0	0	8	21	0	67	15	431	192	62	55	87	153	236	45	2	24	9	25	60	4	0	16	20	35	34	43	13	4	3	8
ENSG00000025772_TOMM34	2	21	2	0	16	15	0	2	25	0	12	1	0	0	35	21	14	20	0	8	1	18	41	16	34	64	52	8	19	24	23	48	18	8	16	4	5	9	28	2	2	19	19	12	24	0	0	32	10
ENSG00000025796_SEC63	1493	1194	1357	903	1228	1288	687	635	2246	1540	2095	1276	877	1548	1691	1136	1973	1526	1067	1141	1398	1438	900	1978	643	2707	2452	1784	1813	1783	2233	2928	1984	1916	2400	2251	2060	2750	2108	1156	1450	1250	1883	1402	2134	1837	1110	2102	2275
ENSG00000025800_KPNA6	558	284	140	289	646	218	237	263	567	283	820	361	340	223	213	437	419	315	212	223	319	418	45	485	143	911	739	418	525	564	414	888	451	323	342	481	342	353	522	202	236	401	478	339	401	394	387	382	338
ENSG00000026025_VIM	1740	1489	3527	1166	1231	2519	843	1496	4039	1697	3371	664	1130	956	1659	4195	1969	1168	1176	594	2054	1521	622	5622	1074	8661	15335	6258	2761	6297	4564	7832	3328	1557	2464	1687	955	2009	958	431	2126	1173	2151	794	1918	2662	1689	1371	1579
ENSG00000026036_RTEL1-TNFRSF6B	0	23	90	9	0	0	0	0	28	0	2	0	0	0	2	42	0	0	0	0	3	0	0	38	0	211	222	6	33	20	62	26	27	0	0	0	2	14	0	0	0	3	0	2	0	0	0	4	0
ENSG00000026103_FAS	56	71	182	302	53	2	5	82	239	1	150	17	7	2	119	252	31	43	48	25	15	10	0	201	77	1000	2312	1043	171	317	494	647	309	26	13	23	211	185	24	40	30	0	68	53	67	57	0	0	5
ENSG00000026297_RNASET2	401	330	1053	593	1214	512	365	284	968	409	1973	158	114	339	595	1129	719	262	224	216	418	868	386	863	82	2668	5088	2029	604	658	927	1111	615	686	635	509	530	697	496	155	662	370	500	754	855	780	199	419	248
ENSG00000026508_CD44	854	128	1089	492	534	598	331	311	1327	1185	789	838	221	79	489	1273	176	564	861	70	597	85	2228	1979	133	3522	3404	2583	804	1240	863	2888	590	1623	678	855	572	976	1632	90	1402	142	2019	282	280	501	261	113	2067
ENSG00000026559_KCNG1	0	0	0	0	0	4	0	1	0	0	10	0	0	0	0	0	0	0	0	0	0	0	0	0	0	0	0	0	0	0	0	0	0	0	0	0	0	0	0	0	0	0	0	0	0	0	0	0	0
ENSG00000026652_AGPAT4	14	0	0	17	39	2	0	6	76	3	29	0	10	39	15	43	18	42	0	20	22	15	6	21	0	317	128	39	26	62	64	173	51	15	3	43	0	59	13	12	19	8	42	8	16	25	1	10	7
ENSG00000026751_SLAMF7	25	152	6	32	89	0	2	57	421	0	183	0	0	2	77	118	3	0	8	20	46	0	10	226	0	1520	610	132	81	339	756	1158	123	2	4	18	0	129	0	8	34	15	95	1	11	88	1	15	1
ENSG00000026950_BTN3A1	2990	2107	1486	889	2642	1193	1933	2600	3493	1830	4346	1823	1618	1754	1324	1358	1664	1680	1566	709	1154	1848	837	2023	522	8540	4971	2669	1800	4028	3411	5875	2695	2091	1484	1890	3320	1558	2200	920	1761	678	1798	1507	1574	1657	956	1406	1898
ENSG00000027001_MIPEP	23	27	5	67	27	149	18	19	59	44	40	24	17	57	54	28	134	24	95	22	65	37	158	74	86	105	97	100	47	66	46	99	56	95	108	34	43	84	108	32	33	47	67	74	50	38	34	76	47
ENSG00000027075_PRKCH	81	226	181	172	136	15	56	41	738	19	483	24	48	37	257	285	2	28	151	57	80	14	38	590	7	3219	1156	325	291	604	958	2622	308	17	21	46	27	322	8	9	143	36	213	33	122	102	40	9	6
ENSG00000027644_INSRR	0	0	0	0	0	0	0	2	0	0	0	7	0	0	0	0	0	0	0	0	0	0	0	0	0	0	0	0	1	0	0	5	0	0	0	0	0	0	0	0	0	0	3	0	0	0	0	0	0
ENSG00000027697_IFNGR1	3738	992	1134	1547	2504	775	864	1293	2020	1244	4045	1384	1054	1413	1419	1585	1843	1329	550	865	1452	1944	857	2110	1526	1915	4199	2673	2187	1485	2181	2521	1431	1487	1440	1704	1894	1186	1614	763	1333	957	2678	1587	1659	1480	544	1309	2152
ENSG00000027847_B4GALT7	2	6	0	26	7	8	1	0	29	0	8	0	5	10	9	18	6	9	5	2	2	0	0	9	0	83	46	16	8	22	36	43	3	9	0	2	6	16	7	4	4	0	3	3	1	0	0	9	8
ENSG00000027869_SH2D2A	15	27	30	2	19	4	8	10	118	0	34	20	0	5	22	26	17	7	7	5	6	3	3	38	0	452	103	30	25	65	80	207	41	6	7	15	11	52	32	2	12	9	29	4	5	16	2	4	8
ENSG00000028116_VRK2	773	500	351	314	586	186	169	690	830	735	960	634	622	830	519	488	1074	995	264	486	769	846	319	982	494	896	563	681	962	775	640	807	750	1307	1377	886	1411	1133	954	536	871	718	999	750	962	1071	482	832	811
ENSG00000028137_TNFRSF1B	18	105	260	51	48	5	2	5	236	6	77	8	0	0	51	254	0	0	137	5	47	8	39	248	25	1517	1627	482	157	319	489	641	198	5	1	48	8	102	7	24	25	3	52	5	57	122	2	2	0
ENSG00000028203_VEZT	1063	969	593	570	1259	397	1195	472	1448	1000	1192	818	1145	1207	946	947	1343	1172	320	375	1075	1012	399	905	323	875	769	921	1000	1199	883	998	1446	1535	1086	970	1068	1079	1137	457	969	547	1113	807	1202	1271	393	898	1326
ENSG00000028277_POU2F2	4	0	15	8	0	3	1	2	10	0	48	0	0	0	18	7	0	4	0	0	4	0	0	27	0	83	107	11	32	56	26	52	8	0	0	3	1	13	4	0	9	1	28	0	3	4	9	2	0
ENSG00000028310_BRD9	123	34	53	12	88	37	50	62	183	70	203	13	42	63	157	90	70	56	19	45	62	68	4	146	81	572	398	122	127	178	296	464	105	55	70	54	47	95	119	12	117	64	117	69	142	73	9	46	67
ENSG00000028528_SNX1	1977	1788	1374	1118	2141	658	800	1403	2028	1166	3513	1532	1706	1419	1577	1447	1934	1140	703	794	1374	1546	680	1726	1098	2133	1882	1660	1898	1539	1824	2106	1936	1505	1464	1584	1442	1047	1851	923	1603	1314	1717	1179	2260	1479	537	1422	1469
ENSG00000028839_TBPL1	2263	1742	927	856	2069	1703	1380	1217	2312	1222	3261	1258	1678	1612	1199	1048	2176	1701	901	927	1774	1654	658	1944	853	1443	1361	1835	1846	963	1838	1949	1770	1600	2456	2015	3008	1552	1874	875	1958	854	2317	1462	2054	2182	645	1850	1901
ENSG00000029153_ARNTL2	205	104	69	168	256	173	189	112	244	354	230	239	202	274	314	156	274	212	23	143	296	227	135	372	27	127	199	212	248	217	239	215	239	358	378	270	334	222	291	87	230	168	269	191	435	345	280	392	262
ENSG00000029363_BCLAF1	341	338	367	199	218	78	31	156	560	163	548	157	288	243	304	414	303	240	126	284	223	260	125	593	259	2503	2424	756	449	689	954	1505	554	227	228	267	317	297	145	95	230	142	402	252	265	355	151	191	248
ENSG00000029364_SLC39A9	190	92	191	61	195	121	82	128	345	177	227	299	247	189	186	218	256	150	77	105	148	179	170	226	323	337	270	168	197	230	224	276	262	145	214	210	218	217	173	148	130	176	232	187	186	184	120	140	196
ENSG00000029534_ANK1	27211	10005	6421	3122	24882	4972	8269	19835	31440	15919	33021	14877	11509	10672	13898	21136	26864	13952	6712	6272	16419	14770	6418	10873	8112	8258	20821	21924	24164	15251	12851	13232	20709	10816	16049	18870	17762	11434	22044	5556	10394	14483	29287	17351	15883	15175	5500	21923	21771
ENSG00000029559_IBSP	0	0	0	0	0	0	0	0	0	0	0	0	0	0	0	0	0	0	0	0	0	0	0	0	0	0	1	0	0	0	0	0	0	0	0	0	0	0	0	0	0	0	0	0	0	0	0	0	0
ENSG00000029639_TFB1M	3	31	73	1	18	2	0	0	16	7	41	14	0	20	22	21	40	5	0	0	4	0	0	34	0	298	73	36	25	59	85	181	24	8	25	5	4	50	0	0	6	0	0	0	20	12	0	2	1
ENSG00000029725_RABEP1	662	215	172	157	509	182	257	165	913	668	986	432	410	579	662	568	758	518	249	261	557	582	263	749	148	1670	1290	612	664	784	846	1318	744	653	837	747	501	797	608	194	693	271	894	541	808	675	460	782	757
ENSG00000029993_HMGB3	3	0	0	31	7	28	0	0	0	12	5	0	0	19	4	1	3	3	57	4	4	12	22	7	0	7	16	5	4	18	1	10	2	4	3	7	15	3	4	8	14	2	5	6	0	3	4	5	0
ENSG00000030066_NUP160	151	91	145	186	129	67	83	163	264	78	240	85	207	35	189	131	99	102	48	101	87	89	56	273	156	1163	634	232	223	313	435	831	199	97	164	153	179	132	82	68	129	68	156	90	61	132	141	121	144
ENSG00000030110_BAK1	26	62	87	2	139	32	22	47	98	6	111	40	21	37	29	52	53	53	9	6	43	52	38	39	28	101	45	76	39	44	76	93	127	32	76	2	132	22	28	24	40	50	28	70	110	32	2	45	50
ENSG00000030304_MUSK	0	0	0	0	0	1	0	1	1	0	0	0	0	0	0	0	0	0	0	0	0	0	0	0	0	0	0	2	0	0	0	0	0	0	0	0	0	0	0	0	2	0	0	0	0	0	0	0	0
ENSG00000030419_IKZF2	4	8	0	57	44	15	1	1	85	3	84	0	10	0	44	55	0	0	0	0	21	2	0	88	0	597	264	56	32	205	1	342	27	8	0	58	0	16	0	0	9	0	65	3	8	25	4	0	1
ENSG00000030582_GRN	928	1200	2866	742	1095	1036	964	1074	2023	938	2150	451	919	464	1014	1569	772	521	804	661	1068	1077	702	1343	307	1219	3911	1740	1263	2111	1061	1254	1256	748	716	795	883	569	988	205	545	1006	1202	897	1010	1093	919	820	734
ENSG00000031003_FAM13B	4175	2677	1864	1694	3816	2218	3164	2605	6539	4679	5593	4079	3294	5126	4743	4105	6027	4776	2044	2629	4467	5310	1656	5284	1574	4409	4160	4749	5410	4753	4678	5282	5798	5566	7453	6354	5238	7289	5320	2246	4628	4035	6312	4733	5753	6564	3065	5401	4328
ENSG00000031081_ARHGAP31	77	5	6	5	169	50	2	14	187	63	90	14	0	7	24	30	88	8	0	3	25	24	0	113	49	187	484	107	85	194	154	188	63	54	48	30	57	72	67	0	30	3	54	9	35	31	111	34	38
ENSG00000031544_NR2E3	0	0	0	0	0	0	0	1	0	0	0	0	0	0	0	0	0	0	0	0	0	0	0	0	0	0	0	0	0	0	0	0	0	0	0	0	0	0	0	0	0	0	0	0	0	0	0	0	0
ENSG00000031691_CENPQ	0	0	0	9	10	5	0	14	1	0	0	3	0	3	3	2	6	27	0	9	4	10	12	45	0	57	47	17	11	12	2	38	18	5	15	4	18	26	4	0	11	0	13	19	6	3	0	7	25
ENSG00000031698_SARS	163	194	353	133	202	138	104	218	213	44	351	57	27	141	190	169	173	124	126	118	154	159	104	300	69	1007	501	205	225	320	401	742	238	136	111	139	161	142	156	90	169	186	160	204	155	131	115	94	186
ENSG00000031823_RANBP3	361	62	90	100	275	261	146	173	255	183	376	217	66	213	205	194	267	148	49	84	172	122	155	304	158	635	485	274	219	267	283	493	235	125	266	268	274	152	210	108	162	125	220	164	199	232	191	133	179
ENSG00000032219_ARID4A	628	193	211	303	303	29	100	177	567	244	774	238	194	413	480	330	284	590	194	91	315	515	23	619	118	1899	2370	996	613	768	817	1327	674	415	425	334	556	591	346	129	439	227	526	353	396	551	113	379	408
ENSG00000032389_TSSC1	14	41	8	8	55	9	6	7	14	7	61	19	3	12	33	40	46	13	0	0	26	27	11	45	11	159	69	25	38	25	23	100	35	14	12	3	29	11	17	6	28	2	43	23	12	10	8	9	10
ENSG00000032444_PNPLA6	659	205	360	174	868	109	400	896	1215	543	1210	677	429	503	707	905	784	636	263	480	612	535	245	672	333	1639	1452	850	1098	974	784	1332	876	635	627	607	553	548	647	303	541	782	705	612	673	524	325	624	668
ENSG00000032742_IFT88	484	508	381	452	383	284	282	154	518	386	654	488	386	484	420	362	700	456	237	237	429	684	364	593	255	543	530	586	444	487	296	646	638	638	745	551	806	613	561	276	631	317	622	511	492	685	218	537	677
ENSG00000033011_ALG1	40	1	121	80	15	11	0	0	69	0	240	29	32	29	14	1	7	17	88	61	38	22	0	116	0	626	108	73	37	113	208	335	52	14	38	22	34	85	11	53	25	0	27	22	30	35	13	17	15
ENSG00000033030_ZCCHC8	89	42	56	2	125	4	1	234	113	31	160	72	46	58	144	30	38	65	23	32	39	42	0	238	0	968	648	192	86	201	327	562	136	75	53	70	74	144	73	9	91	3	67	25	146	57	24	36	42
ENSG00000033050_ABCF2	12	82	6	41	13	26	0	1	75	0	66	1	34	0	58	71	17	8	1	18	14	10	0	90	0	578	337	53	47	130	169	343	53	0	1	12	0	48	2	0	29	0	38	0	49	34	59	0	1
ENSG00000033100_CHPF2	63	37	37	13	60	17	7	48	70	24	103	25	18	49	83	54	46	7	10	18	24	26	14	59	14	229	209	89	52	78	72	157	48	25	36	22	32	36	35	21	30	6	50	33	33	35	9	26	22
ENSG00000033122_LRRC7	0	0	0	0	0	11	0	2	0	0	0	0	0	0	0	0	0	0	0	0	4	0	0	0	0	0	0	0	1	0	0	0	0	0	0	0	0	0	0	0	0	10	0	1	0	0	0	0	0
ENSG00000033170_FUT8	1570	1174	714	1312	4510	1767	1147	1250	2415	3036	2659	1460	1624	1340	1041	3032	1293	1704	858	749	1709	3198	1341	2303	1612	1905	928	4294	1712	1825	1712	1630	2545	2195	2183	3248	1125	2352	4971	900	1283	763	2065	1201	4977	1882	3188	1700	1441
ENSG00000033178_UBA6	404	304	158	398	366	19	263	34	479	128	606	276	151	362	246	231	315	323	89	79	259	227	204	537	92	1219	848	406	355	479	568	1206	454	266	279	329	382	430	303	184	269	271	397	206	341	420	183	269	295
ENSG00000033327_GAB2	669	159	89	98	675	15	335	504	630	447	680	370	237	369	532	685	623	302	218	216	416	379	147	443	131	474	2196	1374	442	539	319	508	437	268	409	558	314	438	206	60	335	264	651	388	413	369	303	401	423
ENSG00000033627_ATP6V0A1	1424	526	811	465	1716	887	547	882	2029	1449	1609	1224	1218	1023	1343	1313	2260	1279	512	763	1517	1568	739	1709	787	985	1960	1432	1594	1342	1673	1438	1686	1347	2356	1850	1126	1926	1587	473	1418	1117	1438	1406	1981	1827	824	1647	992
ENSG00000033800_PIAS1	2805	961	869	1118	1899	827	868	959	2717	1735	1905	1364	1967	2517	2083	1412	2062	2383	933	1223	1698	2155	1092	2945	1045	2925	3546	2374	1783	1903	2265	2848	2054	2760	3202	2437	2743	3384	1884	1079	2170	1057	2104	1561	2316	2808	1821	2299	2451
ENSG00000033867_SLC4A7	151	102	299	53	134	38	86	63	330	95	248	138	85	59	185	145	133	134	138	75	148	188	36	217	26	975	555	239	243	372	382	859	197	174	232	160	168	250	163	55	126	69	183	145	226	160	91	183	66
ENSG00000034053_APBA2	1021	166	304	125	869	228	257	976	1347	419	1074	642	751	866	512	642	686	593	282	100	543	755	369	617	142	2331	971	662	861	1018	1027	1758	1291	775	563	772	902	546	978	295	929	573	706	1017	1357	722	500	595	781
ENSG00000034063_UHRF1	11	1	0	47	0	20	0	2	15	14	6	0	1	0	3	2	2	1	0	0	0	1	0	21	0	19	92	9	3	17	11	18	8	0	4	7	23	5	0	3	6	0	0	1	0	0	8	0	0
ENSG00000034152_MAP2K3	7117	3459	2674	1747	7100	2697	3342	4768	11444	5482	9701	6144	4942	5684	5908	5963	5657	5006	3434	3496	4515	5192	2552	5011	4006	4188	6847	7153	6197	5318	4439	5228	6249	5745	6486	6678	4753	4144	8413	3404	5620	3363	6596	5757	6413	5109	3606	5438	5278
ENSG00000034239_EFCAB1	0	0	0	0	0	0	0	1	0	0	0	0	0	0	0	0	0	0	0	0	0	0	1	0	0	1	1	0	0	0	1	0	0	0	0	0	0	0	0	0	0	0	0	0	0	0	0	0	0
ENSG00000034510_TMSB10	439	776	1546	876	667	1106	600	951	1262	444	1209	195	330	557	668	721	523	508	1343	601	692	398	1127	1441	706	4570	2167	773	724	1388	1926	2968	967	593	334	471	847	808	549	307	493	627	734	372	645	682	288	709	564
ENSG00000034533_ASTE1	4	10	1	39	1	3	1	4	56	9	51	8	12	1	9	32	3	2	5	0	8	11	20	37	0	222	72	20	19	59	69	168	12	1	0	0	4	10	15	0	15	0	50	7	20	14	0	3	0
ENSG00000034677_RNF19A	783	571	315	421	556	374	335	294	1189	434	810	592	519	638	654	618	578	673	537	337	468	633	448	842	483	2825	1849	887	823	947	1647	2495	921	592	811	621	948	689	545	373	612	395	635	708	800	706	326	680	641
ENSG00000034693_PEX3	177	145	123	140	397	522	81	336	675	441	727	332	503	390	413	210	349	510	158	211	425	349	204	341	49	652	401	438	357	434	376	619	639	707	406	418	696	705	513	298	417	255	482	313	609	517	535	501	578
ENSG00000034713_GABARAPL2	7185	8891	5527	6271	5233	7554	6141	4712	8503	5975	8012	5208	5253	6821	6139	5428	7924	7330	7014	6143	7869	7237	7338	6445	3755	3943	4645	5571	7601	6146	6041	5427	8429	9783	8793	6700	8379	7264	8782	7733	6723	7712	7052	6931	8881	7608	3908	7107	6380
ENSG00000034971_MYOC	0	0	0	0	0	25	0	0	0	0	0	0	0	0	0	0	0	0	0	0	0	0	0	0	0	0	2	0	0	0	0	0	0	0	0	0	0	0	0	0	0	0	0	0	0	0	0	0	0
ENSG00000035115_SH3YL1	10	78	0	0	9	24	0	3	31	8	86	7	9	21	45	24	24	23	0	14	20	48	10	54	7	233	165	45	45	45	100	163	50	19	38	17	20	32	20	1	22	0	63	56	15	85	19	33	27
ENSG00000035141_FAM136A	0	8	27	0	1	24	0	1	4	0	1	0	0	6	0	0	0	3	0	13	2	10	3	15	0	56	28	9	4	13	26	26	5	0	0	7	0	4	0	0	1	5	0	0	4	0	0	2	6
ENSG00000035403_VCL	483653	257320	193441	109968	452693	185361	263751	394634	691049	433186	624580	422767	380572	350289	402962	355799	534659	410614	217158	215371	459365	481676	204473	326055	200394	202361	225818	434123	469208	402431	359372	314985	552489	451924	497528	452578	399244	361726	594615	187974	377559	367094	470268	481608	478928	459453	240444	450547	449621
ENSG00000035499_DEPDC1B	32	17	52	8	26	3	31	78	74	69	77	49	32	65	57	57	52	61	55	12	58	60	67	73	40	32	49	83	60	50	36	63	40	55	150	110	75	157	46	28	73	63	96	68	50	93	43	34	40
ENSG00000035664_DAPK2	17	17	20	13	3	4	0	7	31	16	24	13	12	51	56	86	14	39	80	15	29	23	60	71	0	272	440	192	26	35	51	93	51	14	29	49	22	3	35	0	36	13	25	16	48	34	6	19	1
ENSG00000035681_NSMAF	26	92	186	82	102	14	44	27	215	63	114	39	10	48	45	150	54	21	85	69	22	42	34	203	0	733	664	215	114	240	275	627	133	45	46	98	47	146	34	22	63	75	74	29	95	76	39	63	55
ENSG00000035687_ADSS	273	247	105	32	127	10	111	45	452	171	510	154	173	165	282	413	161	142	78	47	186	191	69	481	195	1209	1042	399	265	447	340	858	341	251	241	167	230	283	218	69	182	278	373	127	294	210	85	221	185
ENSG00000035720_STAP1	0	0	1	9	0	0	0	0	21	0	2	0	0	0	21	0	0	0	0	0	1	6	0	24	0	63	47	11	16	24	0	22	2	0	0	0	0	4	0	0	0	0	8	0	2	0	0	0	10
ENSG00000035862_TIMP2	70	12	1	11	24	134	12	71	82	16	6	74	22	12	64	84	13	34	40	39	14	12	18	54	54	113	467	143	56	62	57	39	92	49	57	35	12	25	38	0	19	131	23	25	21	18	64	30	10
ENSG00000035928_RFC1	196	313	239	116	327	90	277	136	566	313	435	205	114	359	318	261	305	287	173	304	249	338	159	650	12	1526	911	326	490	589	637	1403	424	445	418	394	356	736	310	120	311	274	373	363	399	537	100	371	461
ENSG00000036054_TBC1D23	2173	1493	1341	727	1412	835	1524	1128	2088	1165	3387	1658	1597	2263	1244	1198	2898	1951	685	844	1774	1895	636	1483	643	1350	1265	1529	1694	1411	1780	1754	2119	1783	1696	1824	2445	1207	1659	1032	1504	639	1809	1809	1596	1710	739	1345	1918
ENSG00000036257_CUL3	1137	855	584	343	875	610	446	466	1249	787	1626	919	603	744	671	925	916	866	457	339	685	978	327	1447	668	1866	2272	1428	1085	1089	1338	1822	1030	928	1143	1042	1172	1006	730	292	1038	616	997	981	970	945	417	731	806
ENSG00000036448_MYOM2	218	17	0	59	407	64	25	42	1831	76	819	32	71	18	49	456	14	37	577	24	198	20	27	2028	48	9825	27	662	120	1397	93	57	583	3	84	57	66	52	62	35	33	29	1172	22	37	153	0	23	12
ENSG00000036473_OTC	0	0	0	0	0	0	0	0	0	0	0	0	0	0	0	0	0	0	0	0	0	0	0	0	0	0	0	0	0	0	0	0	0	0	0	0	0	0	0	0	0	0	0	0	0	0	0	0	0
ENSG00000036530_CYP46A1	0	0	0	0	0	1	0	0	10	0	0	0	0	0	0	0	0	0	0	0	0	0	0	0	0	2	7	0	0	0	0	1	0	0	0	0	0	0	0	0	0	0	0	0	0	0	0	0	0
ENSG00000036549_ZZZ3	351	259	184	144	326	141	258	168	562	419	496	280	621	525	310	452	481	367	419	189	470	448	233	330	149	740	432	359	692	561	489	695	702	603	484	448	490	496	504	191	431	426	502	374	499	669	195	618	603
ENSG00000036565_SLC18A1	0	0	0	0	0	0	0	1	0	0	0	0	0	0	0	0	0	0	0	0	0	0	0	0	0	0	0	0	0	0	0	0	0	0	0	0	0	0	0	0	0	0	0	0	0	0	0	0	0
ENSG00000036672_USP2	0	0	0	0	0	2	0	0	0	0	16	0	0	0	0	0	0	0	0	0	0	0	0	0	0	0	2	0	0	0	0	0	0	0	0	0	0	0	0	0	0	0	0	0	0	0	0	0	0
ENSG00000036828_CASR	0	0	0	0	0	27	2	3	0	0	0	0	0	0	0	0	0	1	0	0	6	0	0	0	0	0	0	0	0	1	0	0	0	0	0	0	0	0	0	0	0	0	0	0	0	26	1	0	2
ENSG00000037042_TUBG2	94	101	33	1	106	5	22	90	314	82	404	73	123	70	83	138	170	61	130	84	148	128	72	138	185	125	80	134	201	107	228	130	127	120	48	137	145	61	119	79	138	172	216	126	109	79	143	183	199
ENSG00000037241_RPL26L1	27	6	61	0	32	8	0	12	3	0	53	6	1	1	40	38	4	9	0	31	17	10	51	25	2	51	34	11	16	26	12	38	8	5	4	25	18	12	3	0	22	16	4	2	22	22	6	27	43
ENSG00000037280_FLT4	0	0	0	0	0	2	0	3	0	0	5	0	0	0	0	0	0	0	0	0	0	0	0	0	0	0	0	0	0	3	0	0	1	3	0	0	0	0	0	0	0	0	0	0	0	3	0	1	0
ENSG00000037474_NSUN2	60	12	121	63	80	68	113	11	254	122	175	97	42	127	167	106	60	101	153	85	99	111	96	340	49	1210	635	177	183	259	317	832	192	136	114	179	58	203	117	54	135	123	194	63	213	211	194	110	139
ENSG00000037637_FBXO42	233	100	83	49	271	12	15	118	239	84	442	109	155	114	55	233	159	92	0	68	114	144	44	304	37	492	490	238	207	183	294	391	186	196	254	172	133	169	98	78	119	216	163	167	111	199	102	140	181
ENSG00000037749_MFAP3	11	0	85	11	6	19	38	40	62	25	33	8	53	24	19	35	17	15	23	10	18	19	37	59	9	155	165	61	30	65	77	121	43	18	41	31	48	72	23	19	26	15	35	47	20	28	3	15	43
ENSG00000037757_MRI1	7	0	2	4	1	4	0	2	19	0	12	0	0	2	11	2	0	1	7	2	0	10	2	14	0	72	38	8	2	17	12	25	5	0	6	6	0	12	0	0	3	0	4	3	5	2	0	0	0
ENSG00000037897_METTL1	0	0	0	0	0	4	0	0	0	0	4	0	0	0	0	11	0	0	0	0	0	0	4	1	0	4	6	0	4	1	0	9	0	0	0	5	8	6	4	0	1	5	2	0	0	0	17	0	0
ENSG00000037965_HOXC8	0	0	0	0	0	2	0	1	0	0	0	0	0	0	0	0	0	0	0	0	0	0	0	0	0	0	0	0	0	0	0	0	0	0	0	0	0	0	0	0	0	0	0	0	0	0	0	0	0
ENSG00000038002_AGA	90	0	0	27	132	260	17	0	45	22	142	32	107	63	30	55	27	25	43	16	61	70	109	134	0	509	279	34	77	208	139	342	108	35	11	21	70	81	16	0	61	5	46	84	132	37	0	23	24
ENSG00000038210_PI4K2B	99	84	74	111	47	98	21	63	199	50	218	109	37	138	93	73	62	117	34	44	91	82	66	88	0	302	174	118	99	137	60	306	107	117	155	90	93	133	80	30	52	139	115	80	158	145	61	108	50
ENSG00000038219_BOD1L1	239	146	494	411	177	170	62	107	781	188	601	181	190	230	373	1388	482	209	325	183	228	224	152	1344	32	4794	8530	3015	676	1469	1661	2787	1020	182	186	342	486	623	184	81	361	235	442	204	226	422	150	238	166
ENSG00000038274_MAT2B	1388	1017	617	878	1235	586	887	938	1520	980	1928	1084	702	913	779	729	908	830	652	908	831	923	568	1463	746	2028	1988	1264	1170	1135	1142	1844	1032	1254	1265	1049	1534	1232	1324	1032	900	830	1261	960	1084	991	613	872	1232
ENSG00000038295_TLL1	0	0	0	1	1	1	0	0	0	0	0	0	0	0	0	0	0	0	0	0	0	0	0	0	0	0	0	0	0	0	5	0	0	0	0	0	0	0	0	0	0	0	0	0	0	0	0	0	0
ENSG00000038358_EDC4	59	75	54	63	137	13	58	49	232	82	285	42	57	22	131	137	109	37	23	40	50	20	59	177	16	989	554	179	133	240	221	557	92	35	56	109	40	47	25	10	48	72	92	49	72	48	41	32	34
ENSG00000038382_TRIO	953	324	421	95	848	359	545	623	1545	626	1049	1331	450	843	1562	1166	1018	644	354	208	961	771	418	793	370	1829	1485	980	1541	1179	852	1522	970	486	990	616	613	996	1024	312	1062	1136	1243	571	730	937	476	946	670
ENSG00000038427_VCAN	40	636	4319	587	0	330	89	8	171	241	955	66	0	48	38	2251	20	41	169	18	9	38	63	3346	0	646	10532	1968	3647	11037	865	6316	333	25	53	849	3	157	12	0	114	49	467	209	1178	2394	49	3	1
ENSG00000038532_CLEC16A	484	339	322	275	732	168	148	336	972	484	785	504	348	475	501	638	626	642	236	240	529	563	168	605	383	772	731	513	659	662	585	769	648	681	627	658	552	771	482	213	436	497	825	495	568	596	445	692	459
ENSG00000038945_MSR1	0	1	2	1	0	1	1	0	1	0	0	0	0	0	0	0	1	0	0	0	0	0	0	0	0	0	8	4	6	10	8	6	0	0	0	0	0	0	0	0	0	0	0	0	5	4	0	0	0
ENSG00000039068_CDH1	25	8	6	5	0	21	8	0	36	0	0	1	29	3	9	142	1	9	1	12	2	33	4	3	63	73	258	63	74	25	33	32	8	0	11	4	17	3	8	20	0	19	18	43	5	13	77	4	1
ENSG00000039123_SKIV2L2	416	588	234	376	312	104	231	187	664	290	614	296	343	361	557	406	344	433	112	170	358	453	191	759	335	1348	1111	468	573	639	901	1395	535	524	676	526	488	691	338	200	470	396	427	390	441	551	114	384	259
ENSG00000039139_DNAH5	3	2	2	0	0	22	0	3	1	0	0	4	0	0	0	0	0	0	0	0	0	9	0	13	0	0	4	0	0	0	0	0	2	0	0	0	0	0	26	0	1	6	9	0	0	0	6	0	0
ENSG00000039319_ZFYVE16	44	54	64	141	48	37	34	18	156	33	111	31	21	22	94	313	24	52	19	0	79	44	0	284	34	862	1822	580	152	348	359	474	242	47	48	40	96	105	12	0	33	80	86	61	51	83	68	30	31
ENSG00000039523_FAM65A	86	6	66	24	55	17	15	89	133	79	143	45	15	35	58	115	52	36	34	64	50	39	27	104	52	299	500	172	74	147	100	269	71	26	45	46	48	29	26	24	57	35	65	35	60	67	85	37	24
ENSG00000039537_C6	0	0	0	0	0	24	0	1	0	0	0	0	0	0	0	0	0	0	0	0	0	0	0	0	0	0	0	0	0	0	0	0	0	0	0	0	0	0	0	0	0	0	0	0	0	0	0	0	0
ENSG00000039560_RAI14	0	5	6	2	0	25	4	3	5	9	22	2	0	1	0	1	0	2	0	0	3	8	0	7	0	8	11	2	1	2	27	8	2	7	1	0	0	8	0	0	0	0	0	3	0	23	21	1	6
ENSG00000039600_SOX30	0	0	0	0	0	2	0	0	0	0	0	0	0	0	5	0	0	2	0	0	0	0	0	0	0	0	2	0	5	0	0	0	0	0	0	0	0	0	0	0	0	0	0	0	0	0	0	0	0
ENSG00000039650_PNKP	211	100	444	76	123	69	116	45	519	64	282	130	67	175	111	458	176	160	81	113	151	173	135	600	137	1838	1435	611	380	514	570	1044	378	105	255	208	64	301	147	110	126	381	145	102	186	153	10	178	125
ENSG00000039987_BEST2	98	9	13	23	86	5	97	17	102	64	122	44	31	97	90	43	92	54	19	36	45	99	53	46	14	27	28	56	76	46	45	51	78	65	75	128	118	51	82	31	64	56	43	94	118	67	50	56	68
ENSG00000040199_PHLPP2	98	19	415	38	73	3	45	30	217	135	236	64	65	87	114	213	67	151	17	38	116	71	67	171	214	484	446	170	174	180	230	313	99	106	126	162	46	122	72	39	54	82	158	119	88	105	17	120	95
ENSG00000040275_SPDL1	44	123	54	71	69	9	25	103	133	71	155	51	108	60	27	46	81	102	63	62	105	89	38	72	29	145	116	69	81	90	79	130	74	129	79	63	46	76	80	42	52	31	97	70	44	102	33	48	80
ENSG00000040341_STAU2	2397	2287	1599	974	2318	1675	1703	1267	3714	2640	3633	2377	1916	3274	2563	2332	3761	3344	1416	1999	2834	3352	1375	2696	1118	1933	2538	3044	3602	2474	2355	3155	3407	4074	4625	3953	3635	4721	3156	1691	2824	2300	3741	2582	3728	4115	2707	4535	3189
ENSG00000040487_PQLC2	32	71	61	22	182	5	9	22	82	38	182	43	11	4	53	103	18	38	5	53	36	33	17	59	100	43	39	54	54	51	66	52	53	32	23	67	53	21	82	53	53	55	54	26	46	72	9	20	26
ENSG00000040531_CTNS	2207	759	517	517	2257	799	345	981	1982	1128	3587	1230	866	720	1130	760	1866	745	375	633	1017	1235	698	1307	736	923	807	1469	1133	678	1135	1402	515	884	1451	1634	922	1037	1349	558	1637	655	1916	1157	1335	1642	811	1424	1249
ENSG00000040608_RTN4R	0	0	1	0	25	1	0	3	1	0	3	0	0	0	0	0	0	0	0	0	0	0	0	2	0	78	12	0	0	6	3	24	6	0	0	0	0	0	0	0	0	0	4	0	0	5	0	0	0
ENSG00000040633_PHF23	125	73	48	65	173	25	27	61	125	121	384	90	15	123	131	141	115	55	26	65	79	123	17	156	63	356	280	172	150	142	217	287	116	59	100	122	147	57	75	87	89	55	86	77	64	116	26	72	76
ENSG00000040731_CDH10	4	0	0	0	0	1	0	9	1	37	20	12	15	7	0	2	40	14	0	8	5	7	0	5	10	22	6	6	21	9	2	6	36	21	20	0	10	5	0	0	16	10	8	11	4	25	0	26	9
ENSG00000040933_INPP4A	60	49	165	29	82	7	6	48	381	16	331	17	12	41	125	156	29	7	38	18	57	19	14	326	0	1981	983	269	162	394	504	1350	201	24	27	54	55	123	23	12	33	23	100	15	89	52	0	19	15
ENSG00000041353_RAB27B	21065	12376	11416	11576	14829	10772	13192	11412	21268	13278	21858	14484	18733	23529	14754	10883	17852	16636	10294	13179	12645	17340	9057	14997	8695	10917	8078	21110	20186	13748	13862	16321	19917	20893	24221	18997	24962	16105	17113	11918	19128	13018	15708	15727	18224	18836	9916	18915	22235
ENSG00000041357_PSMA4	99	96	148	194	116	129	67	15	152	91	210	60	30	99	158	120	61	84	92	54	65	95	32	202	58	578	463	143	107	213	313	406	170	90	110	82	96	108	60	80	90	86	79	81	165	183	75	86	63
ENSG00000041515_MYO16	0	0	0	0	0	6	0	1	1	0	0	0	20	0	0	0	0	0	0	0	0	0	0	0	0	0	4	4	0	0	0	0	1	0	0	0	0	0	0	0	0	0	0	0	0	0	0	0	0
ENSG00000041802_LSG1	89	99	34	56	198	68	63	11	133	5	177	35	130	74	201	68	99	33	36	40	69	151	56	172	68	619	280	161	91	127	206	605	147	61	101	212	58	130	109	57	112	82	86	76	85	84	53	97	21
ENSG00000041880_PARP3	7	31	3	8	25	13	55	20	107	0	67	10	17	17	23	12	21	26	16	15	24	49	13	13	28	50	21	36	21	17	48	36	37	14	9	31	52	4	34	13	21	3	23	33	22	37	18	24	48
ENSG00000041982_TNC	0	7	7	2	0	19	6	2	11	0	3	0	0	0	2	1	0	2	0	0	0	1	0	0	0	0	4	1	0	4	16	12	0	0	0	0	0	0	0	0	0	0	0	0	0	5	41	6	3
ENSG00000041988_THAP3	19	7	27	0	27	76	0	30	3	25	16	7	0	0	22	0	0	9	10	0	7	2	12	32	0	92	59	25	9	32	25	84	6	3	0	8	2	10	7	0	2	0	21	0	13	6	0	7	9
ENSG00000042062_FAM65C	498	155	128	128	317	124	111	235	271	133	505	234	103	265	194	183	328	225	166	223	163	239	45	217	184	195	208	353	209	226	241	314	204	110	243	172	506	146	181	159	288	155	310	213	276	218	124	148	203
ENSG00000042088_TDP1	99	22	97	194	23	21	10	168	250	1	171	58	11	55	73	64	62	61	77	0	125	91	68	112	0	681	354	111	123	169	164	457	142	100	43	150	27	146	46	62	35	0	151	23	76	126	72	36	9
ENSG00000042286_AIFM2	0	9	21	0	0	43	0	2	3	0	12	0	0	0	0	0	0	0	0	0	1	0	0	6	0	50	30	2	8	9	26	56	9	0	7	9	0	3	0	0	1	0	8	0	1	0	10	2	1
ENSG00000042304_C2orf83	0	0	0	0	0	0	0	0	0	0	0	0	0	0	0	0	0	0	0	0	0	0	0	0	0	0	0	0	0	0	0	0	0	0	0	0	0	0	0	0	0	0	0	0	0	0	0	0	0
ENSG00000042317_SPATA7	66	86	2	1	174	1	102	86	19	166	132	31	122	475	144	231	189	341	47	153	189	216	104	143	17	162	95	35	321	216	203	282	346	180	451	354	45	228	407	20	201	112	285	202	169	227	47	430	77
ENSG00000042429_MED17	75	63	144	129	113	14	18	100	282	193	154	182	81	141	78	133	155	230	54	35	193	153	0	285	76	847	620	266	202	256	417	739	200	267	282	194	223	384	166	55	83	100	273	126	239	205	70	227	174
ENSG00000042445_RETSAT	14	5	0	8	9	12	0	0	15	0	30	6	9	15	1	45	0	5	0	0	10	6	0	21	3	207	102	25	19	57	45	104	22	5	0	8	0	10	9	0	7	37	9	4	12	6	1	2	0
ENSG00000042493_CAPG	1	29	223	42	0	34	22	2	9	1	26	0	0	0	13	80	0	1	0	21	4	6	13	61	2	116	288	59	57	106	22	95	18	0	0	10	0	3	12	0	0	0	5	4	20	5	0	1	0
ENSG00000042753_AP2S1	1977	1465	1180	884	2197	927	1173	1572	1702	997	2871	1008	810	1084	1005	1229	1441	1080	1578	1461	1214	1898	1050	1372	555	867	695	1359	1501	1044	1198	1292	1114	1015	1277	1890	1704	1422	1462	1288	1675	1764	2333	1732	2376	1442	444	1402	1334
ENSG00000042781_USH2A	0	0	0	0	0	2	0	5	0	0	0	0	0	0	0	0	0	1	2	1	8	0	0	6	1	0	0	0	0	0	0	0	0	1	1	0	2	2	1	0	1	0	0	0	1	0	1	0	0
ENSG00000042813_ZPBP	0	0	0	10	0	1	0	0	10	0	0	0	0	0	0	0	0	0	0	0	0	0	0	0	0	0	0	0	0	0	0	0	0	0	0	0	0	0	0	0	0	0	0	0	0	0	0	0	0
ENSG00000042832_TG	104	69	33	35	67	12	15	113	127	60	62	71	94	59	71	171	101	55	135	65	107	138	62	51	63	79	416	134	121	81	2	180	116	81	131	109	86	30	83	42	83	41	119	19	90	86	0	63	50
ENSG00000042980_ADAM28	3	9	35	1	0	1	3	0	24	0	2	16	0	0	9	4	0	0	0	0	0	0	0	57	0	201	333	81	28	63	73	107	17	4	8	0	0	21	0	0	0	0	35	3	4	20	2	3	12
ENSG00000043039_BARX2	0	0	0	0	0	32	0	1	0	0	0	0	0	0	0	0	0	0	0	0	0	0	0	0	0	0	0	0	0	0	0	0	0	0	0	0	0	0	0	0	0	0	0	0	0	0	0	0	0
ENSG00000043093_DCUN1D1	1786	3147	2029	2617	2261	1779	2234	939	2439	1404	2910	1534	1660	1494	1480	1671	1798	1381	1327	1739	1437	1871	1486	2060	1573	1296	2726	2570	2811	1817	1898	2228	1867	2540	2443	2623	1915	2034	2058	1663	1700	1466	1857	1614	2073	2593	725	1446	1855
ENSG00000043143_PHF15	165	138	59	75	171	30	21	148	426	52	355	119	44	60	189	196	134	57	45	49	78	80	45	197	9	1152	389	164	226	301	439	799	202	69	92	81	152	155	146	57	127	55	155	72	137	105	154	53	44
ENSG00000043355_ZIC2	0	0	0	0	0	10	0	3	0	0	0	0	0	0	0	0	0	0	0	0	0	0	0	0	0	0	0	0	0	0	0	0	0	0	0	0	0	0	0	0	0	0	0	0	0	0	0	0	0
ENSG00000043462_LCP2	5975	1482	1805	1150	3297	427	1870	1798	4348	1689	4763	2559	1590	2938	2275	2537	3196	2622	1696	2249	1621	2271	843	3323	1404	6248	6705	4445	2925	2584	3983	4835	3929	2032	2530	3362	5585	1875	2704	1920	2902	991	2613	2080	2799	2937	1097	1999	2487
ENSG00000043514_TRIT1	38	2	58	1	22	18	62	3	30	43	70	36	56	33	8	76	57	21	10	3	82	42	2	37	0	107	94	76	40	50	50	81	69	45	73	50	13	41	58	13	34	61	44	34	74	25	17	68	23
ENSG00000043591_ADRB1	0	0	0	0	0	6	0	1	0	0	0	0	0	0	0	0	0	0	0	0	0	0	0	0	0	15	0	0	0	2	0	6	1	0	0	0	0	0	0	0	0	0	0	0	0	0	0	0	0
ENSG00000044012_GUCA2B	0	0	0	0	0	0	0	0	0	0	0	0	0	0	0	0	0	0	0	0	0	0	0	0	0	0	0	0	0	0	0	0	0	0	0	0	0	0	0	0	0	0	0	0	0	0	0	0	0
ENSG00000044090_CUL7	47	0	2	22	10	12	2	5	70	0	115	25	0	11	64	5	61	19	5	40	24	37	0	112	4	386	268	46	53	85	113	270	65	18	0	49	8	37	28	23	16	11	11	10	29	37	23	42	0
ENSG00000044115_CTNNA1	4470	1855	1630	1733	4211	2452	3312	4753	6689	3446	6517	3623	3112	3602	3584	3881	5019	3897	1990	1798	5953	3912	1572	3577	1990	2615	2844	3264	3652	4160	3981	3143	5909	4265	3469	3453	6104	2369	5492	1312	3352	3081	4931	4146	4163	4283	1870	4525	4948
ENSG00000044446_PHKA2	412	155	265	147	230	182	371	287	461	89	501	164	190	387	291	394	394	202	113	67	248	389	73	488	53	1645	1485	602	415	510	930	1006	435	187	333	260	346	234	393	96	296	177	281	294	239	299	267	184	179
ENSG00000044459_CNTLN	1522	1321	1029	700	1318	1073	749	674	2162	2383	1614	1656	1925	1899	1416	1053	1872	1714	1089	930	1719	1945	606	2022	582	1183	1506	1730	1759	1679	1420	1974	2198	2915	3416	2628	2262	3095	2128	910	1886	1710	2571	1789	2436	3100	1617	2491	2469
ENSG00000044524_EPHA3	0	0	0	0	0	1	0	2	0	0	0	0	0	0	0	0	0	0	0	0	0	0	0	0	0	0	0	0	0	0	0	0	0	0	0	0	0	0	0	0	0	0	0	0	0	0	0	0	0
ENSG00000044574_HSPA5	131	257	160	225	151	322	42	58	536	73	386	56	111	74	217	294	100	91	69	93	130	203	50	749	35	4006	2554	690	395	820	1121	1782	408	77	94	98	110	198	55	29	136	47	256	138	131	226	169	79	83
ENSG00000046604_DSG2	6	4	5	3	0	38	4	1	11	0	0	0	0	1	7	0	0	0	0	0	4	19	0	0	0	1	37	5	1	0	12	0	2	0	0	15	7	3	0	0	0	0	0	3	0	1	127	6	1
ENSG00000046647_GEMIN8	22	0	0	0	29	23	0	0	8	1	19	2	10	8	13	11	20	5	39	0	18	7	10	51	4	49	27	12	17	22	1	53	25	2	10	10	20	10	0	0	13	7	1	21	1	18	48	18	2
ENSG00000046651_OFD1	718	556	198	469	572	1089	327	622	1005	1067	755	519	829	1026	923	485	1133	1136	300	757	881	1340	557	1302	160	2215	2372	1147	1045	1250	1209	1802	1004	1213	1269	1149	1173	1660	1078	343	936	678	1094	679	1361	1064	800	1183	1028
ENSG00000046653_GPM6B	0	1	0	24	4	2	0	0	5	0	0	0	0	5	8	13	0	0	0	0	3	0	0	1	0	8	12	2	9	1	11	11	1	0	9	4	0	1	0	0	3	0	1	0	0	4	0	0	0
ENSG00000046774_MAGEC2	0	0	0	0	0	2	0	0	0	0	0	0	0	0	0	0	0	0	0	0	0	0	0	0	0	0	0	0	0	0	0	0	0	0	0	0	0	0	0	0	0	0	0	0	0	0	0	0	0
ENSG00000046889_PREX2	0	0	0	4	0	0	38	4	7	47	0	20	0	12	0	24	18	0	11	0	7	1	12	39	21	12	3	0	0	0	0	9	3	0	18	3	13	4	0	0	11	0	0	3	5	5	0	1	0
ENSG00000047056_WDR37	410	249	305	53	470	371	266	295	1203	598	624	664	445	429	291	220	395	512	198	246	534	535	474	506	184	642	649	529	403	544	597	569	571	548	645	553	601	784	530	242	512	543	428	507	537	815	586	762	559
ENSG00000047188_YTHDC2	1215	877	629	378	780	379	775	1005	1258	628	1450	1070	852	1166	829	512	1183	903	240	403	1346	861	216	804	251	1219	950	896	1217	1030	877	1452	1388	1352	1120	702	1042	798	1148	526	1202	622	1101	860	1149	909	589	793	1150
ENSG00000047230_CTPS2	221	123	402	0	108	78	98	63	314	257	304	158	275	280	157	109	201	300	34	163	211	287	148	186	145	302	218	227	212	199	232	193	316	293	473	291	244	315	268	82	186	241	236	200	200	242	213	315	177
ENSG00000047249_ATP6V1H	395	128	75	48	176	52	313	79	234	185	279	121	68	173	155	86	199	228	27	112	197	150	85	211	73	426	340	199	222	257	277	367	293	229	251	211	189	186	185	112	193	168	184	165	316	217	67	111	171
ENSG00000047315_POLR2B	615	605	692	699	683	235	328	371	955	333	968	337	295	511	725	528	741	446	149	279	436	644	331	1296	264	3382	2319	952	816	1222	1218	2694	832	470	670	594	563	690	505	321	494	580	668	581	616	572	348	556	534
ENSG00000047346_FAM214A	804	473	116	133	516	235	125	204	652	367	1073	558	289	635	608	564	599	421	262	232	499	581	163	735	433	1486	1538	842	588	637	669	1332	507	556	717	776	580	694	468	168	560	337	641	455	575	699	245	552	404
ENSG00000047365_ARAP2	86	218	379	51	275	1	3	76	840	87	483	32	25	44	267	324	49	30	23	25	129	13	52	692	28	5647	2103	609	429	841	1590	3857	453	27	45	90	29	280	53	11	103	7	275	68	114	232	37	28	23
ENSG00000047410_TPR	662	696	619	471	560	118	146	459	1148	384	1258	491	313	427	1022	1393	542	336	340	281	572	495	177	1637	602	6889	8073	2663	1270	2241	2782	5065	1455	533	474	466	777	1254	445	226	526	413	1034	494	681	834	301	441	477
ENSG00000047457_CP	0	0	2	1	0	7	1	1	11	0	0	0	0	0	2	0	0	0	0	1	0	0	0	17	0	15	17	2	0	7	10	23	5	0	0	0	0	0	0	1	0	0	3	2	0	0	0	0	0
ENSG00000047578_KIAA0556	44	24	111	38	22	50	152	54	167	100	235	71	55	66	143	82	124	61	101	49	57	75	110	131	0	435	628	373	104	220	199	307	132	72	74	75	42	104	35	14	45	84	127	68	68	35	66	64	46
ENSG00000047579_DTNBP1	29	11	88	3	45	4	0	20	87	51	214	18	22	49	25	117	39	35	6	64	56	31	28	255	0	906	352	110	67	130	204	550	104	36	26	40	132	63	24	67	41	62	59	25	27	35	27	17	88
ENSG00000047597_XK	3477	3030	2836	1563	4548	3163	1927	3758	5980	3032	6249	4585	2288	2726	2349	4083	3371	2751	1871	2311	4189	2530	3207	3212	1905	1178	2834	2866	4592	2870	2382	2385	2441	3689	3281	3305	2150	3581	3866	2114	2996	3854	9896	2932	4689	3006	2960	3889	3533
ENSG00000047617_ANO2	877	231	207	137	736	112	410	758	735	747	644	666	420	726	417	451	914	471	317	418	369	604	247	1190	320	301	156	486	608	396	332	417	513	703	701	1439	811	885	801	214	580	580	857	423	999	765	509	1096	669
ENSG00000047621_C12orf4	29	50	1	111	114	30	46	0	116	112	188	43	28	39	47	30	58	81	22	34	82	73	47	87	8	269	184	64	50	102	123	226	81	85	95	107	123	94	115	35	61	44	85	72	124	124	30	91	106
ENSG00000047634_SCML1	19	77	49	55	26	91	84	13	34	3	65	28	40	72	19	12	60	56	101	34	25	46	10	39	6	29	42	24	46	31	78	17	57	47	63	8	67	29	50	18	27	0	51	34	60	45	0	79	25
ENSG00000047644_WWC3	1404	313	562	233	1438	444	542	1193	2181	1290	1669	1405	805	978	1142	1430	1342	1151	440	409	1260	982	772	1246	483	740	2038	1395	1564	1210	750	825	1165	888	1137	1255	676	1163	1267	495	940	1119	1725	966	959	1116	751	929	1119
ENSG00000047648_ARHGAP6	13401	5258	3970	2911	10430	3821	5582	7352	15203	10192	15057	10407	6029	9889	9931	8133	14167	7954	4207	4734	7929	11214	4434	9404	5162	5779	5709	12402	9491	8509	9618	8026	10344	9269	13454	11702	14693	10915	10816	4496	9778	7737	12612	10623	12482	10612	5477	10396	10022
ENSG00000047662_FAM184B	13	0	29	0	5	2	4	0	21	0	2	0	0	4	0	0	0	5	0	0	2	0	17	7	0	5	0	0	0	2	0	13	3	0	0	0	29	17	0	1	0	29	22	0	2	0	0	4	0
ENSG00000047849_MAP4	119	129	99	39	153	137	191	101	323	68	358	27	61	69	213	96	162	74	122	44	100	119	39	540	132	2326	1023	239	285	466	541	1393	318	65	69	117	195	236	74	67	100	35	165	69	100	117	112	107	83
ENSG00000047932_GOPC	29	45	25	9	61	85	61	26	81	14	74	30	5	14	51	26	20	27	15	46	45	17	35	107	43	330	233	76	68	77	104	283	44	19	30	18	50	54	30	18	25	6	52	28	20	20	0	31	15
ENSG00000047936_ROS1	0	1	1	0	0	63	1	0	0	0	0	0	0	0	0	0	0	0	0	0	0	0	0	0	0	0	0	0	0	0	0	0	0	0	0	0	0	0	0	0	0	0	0	0	0	0	0	0	0
ENSG00000048028_USP28	54	127	108	54	99	23	2	26	540	14	191	1	40	17	202	163	5	19	137	14	50	0	10	312	4	2611	801	216	146	377	717	1984	169	19	7	47	12	176	25	0	76	26	128	10	41	94	4	16	18
ENSG00000048052_HDAC9	1891	797	620	674	1757	859	819	872	1938	1632	2370	1235	1423	1450	1792	1582	2430	1582	876	1231	1925	1830	870	2521	1033	1111	1312	1154	2353	1453	1075	2369	1611	1753	2478	2063	1624	2227	2167	976	1972	1164	1495	1685	2364	2207	716	2085	1626
ENSG00000048140_TSPAN17	0	1	50	4	15	21	1	1	43	0	38	7	3	8	15	12	22	17	0	0	6	9	0	56	0	234	90	15	33	41	87	138	28	12	3	21	15	6	4	0	8	14	24	10	24	3	23	18	0
ENSG00000048162_NOP16	3	20	44	0	2	9	2	0	5	1	9	0	0	2	3	0	0	0	0	0	2	7	0	8	0	36	25	9	5	7	3	30	3	1	0	1	4	1	0	0	3	2	7	0	0	1	0	12	0
ENSG00000048342_CC2D2A	0	17	2	0	16	2	0	2	3	0	7	11	0	0	0	2	0	0	0	0	0	2	0	2	0	6	9	8	0	8	11	16	0	0	0	0	0	0	0	0	3	0	0	0	0	4	10	0	0
ENSG00000048392_RRM2B	144	167	108	47	106	83	63	6	141	142	106	88	29	69	79	217	68	63	106	14	59	70	61	181	42	341	763	304	75	139	218	219	132	87	133	77	61	102	63	121	76	44	102	47	121	84	20	43	33
ENSG00000048405_ZNF800	128	89	118	37	85	37	85	111	220	69	170	76	182	132	133	89	125	79	42	40	72	110	23	154	41	742	427	169	146	240	273	594	174	110	131	132	178	177	125	43	189	66	112	84	125	225	39	226	96
ENSG00000048462_TNFRSF17	0	8	1	11	0	0	1	0	3	0	0	0	0	0	5	0	0	0	0	0	1	0	0	15	0	0	8	0	0	11	1	0	0	0	0	0	0	0	0	0	0	0	0	0	0	0	0	0	0
ENSG00000048471_SNX29	1549	128	792	354	1222	59	380	901	1751	543	2414	770	889	695	1102	756	1204	1228	394	603	907	848	736	943	399	1660	1355	1297	1162	1267	910	1169	1507	839	999	921	1583	717	1655	508	1205	1196	1207	799	1064	1187	688	899	1228
ENSG00000048540_LMO3	0	0	0	0	0	2	0	0	0	0	0	0	0	0	0	0	0	0	0	0	0	0	0	0	0	0	0	0	0	0	0	0	0	0	0	0	0	0	0	0	0	0	0	0	0	0	0	0	0
ENSG00000048544_MRPS10	232	152	257	55	127	66	42	28	229	104	324	79	77	46	115	148	122	184	63	77	90	68	113	173	76	212	159	109	206	123	219	189	148	160	65	113	199	119	113	70	170	97	179	133	159	198	71	233	107
ENSG00000048545_GUCA1A	0	0	0	0	0	0	0	0	0	0	0	0	0	0	0	0	0	0	0	0	0	0	0	0	0	0	0	0	0	0	0	0	0	0	0	0	0	0	0	0	0	0	0	0	0	0	0	0	0
ENSG00000048649_RSF1	2333	1373	1190	856	1789	563	1059	1017	2765	2282	2542	1976	1578	2598	2479	2083	2723	2331	931	1204	2518	2850	915	3109	1024	3369	3243	2894	2959	2706	2535	3791	3154	3793	4352	3207	3693	4214	2475	998	2521	2192	3285	2281	3241	3807	1804	3293	2750
ENSG00000048707_VPS13D	2142	736	938	615	1666	398	639	1966	2679	978	2887	1857	1632	1786	2371	1856	2688	1253	606	638	1681	1813	358	1858	826	5880	4574	2226	2096	3173	3107	4644	2888	1455	2132	2171	2084	1570	1962	767	2310	1501	1796	1581	1823	1531	935	1350	1775
ENSG00000048740_CELF2	4939	4266	3606	3382	4050	2611	3578	2754	6645	3192	5518	3685	3649	4999	3279	3382	4843	5240	2802	4596	4285	3699	3637	3481	2670	4628	4063	5231	4554	3012	3887	4419	5201	5150	4873	4977	5491	4640	5998	3761	3437	3871	5040	3638	4127	4281	3528	5492	6195
ENSG00000048828_FAM120A	4011	2050	2032	888	3947	1086	2075	2866	6459	4436	5429	3661	3660	4011	3734	4363	5067	5019	1936	1827	4313	4203	1454	3679	1981	4822	4839	4034	4633	4607	3966	4662	5707	4944	5480	5038	4746	5087	5899	1864	3773	3636	4811	4386	5494	5038	3391	4681	4277
ENSG00000048991_R3HDM1	1032	758	1021	490	1146	384	792	514	1868	1329	1720	1369	1356	1424	1331	852	1417	1437	653	615	1599	1434	717	1406	559	1459	1226	1251	1157	1304	973	1304	1409	1966	2587	1615	1334	2113	1613	608	1243	1148	1559	1450	1559	1525	1234	2011	1945
ENSG00000049089_COL9A2	0	1	94	58	0	4	0	0	1	29	10	0	0	0	8	0	0	1	8	0	0	0	0	2	0	31	185	61	11	18	6	9	8	0	2	0	2	0	0	0	4	0	1	0	3	14	0	0	0
ENSG00000049130_KITLG	312	249	145	125	254	90	261	264	416	650	224	421	116	736	298	191	343	284	331	317	419	268	346	571	309	202	219	693	373	206	702	385	465	508	650	274	136	558	166	56	270	405	506	311	328	317	526	509	528
ENSG00000049167_ERCC8	13	24	106	4	0	2	0	7	21	8	54	39	54	41	76	46	21	44	0	5	34	78	38	130	0	293	119	56	93	80	90	254	74	89	88	56	27	65	26	11	23	18	21	34	39	82	33	74	11
ENSG00000049192_ADAMTS6	816	1213	795	445	854	1130	248	528	1281	2488	1288	1445	756	1002	1248	744	867	646	981	433	1195	1377	269	1407	532	455	1508	1333	1150	608	516	2221	779	1942	2879	1731	631	1541	1049	375	658	1107	1972	1085	1041	1485	789	1263	764
ENSG00000049239_H6PD	19	4	69	53	0	25	4	1	183	0	59	5	2	27	7	127	19	0	0	0	14	0	20	174	0	1007	715	211	88	191	184	614	59	18	0	0	13	43	2	13	19	17	60	7	18	59	37	4	3
ENSG00000049245_VAMP3	500	614	559	674	467	824	907	163	615	384	573	295	439	639	370	291	374	446	791	874	472	353	584	525	334	374	378	311	355	324	416	279	519	546	584	454	724	545	583	551	373	716	374	418	447	376	416	578	427
ENSG00000049246_PER3	11	1	243	0	98	82	2	53	342	193	274	37	9	212	62	162	59	99	30	156	46	19	20	121	113	121	105	41	55	53	99	89	121	52	154	48	167	82	71	173	72	11	164	112	114	228	34	259	29
ENSG00000049247_UTS2	0	0	0	0	2	1	0	9	37	4	5	0	0	0	6	46	0	0	1	0	1	0	0	38	0	213	0	23	1	1	20	69	14	0	3	9	3	14	6	0	6	0	15	0	0	6	0	2	2
ENSG00000049249_TNFRSF9	0	0	1	8	0	0	0	0	2	24	8	0	0	0	0	0	0	1	0	0	0	0	0	4	0	15	55	13	1	11	1	0	1	0	0	0	0	0	0	0	0	0	0	0	0	0	0	0	0
ENSG00000049283_EPN3	10	0	0	0	0	9	0	1	0	0	0	0	0	0	0	0	0	0	0	0	0	0	0	0	0	0	0	0	0	0	0	0	0	0	0	0	0	0	0	0	0	0	0	5	0	0	20	0	0
ENSG00000049319_SRD5A2	0	0	0	0	0	0	0	0	0	0	0	0	0	0	0	0	0	2	0	0	1	0	0	0	0	0	0	0	0	0	0	0	0	0	0	0	0	0	0	0	0	0	0	0	0	0	0	1	0
ENSG00000049323_LTBP1	58798	46989	34897	20945	61058	28385	44580	39274	97051	57560	86398	56760	51464	58446	59058	43651	67822	68498	31944	37911	60388	55418	29691	43664	28958	29610	26099	51215	77298	63984	52220	43383	93034	70848	61025	57752	69962	53549	99647	30803	56213	43731	60115	59571	64644	69950	34555	52445	72557
ENSG00000049449_RCN1	13	55	1	2	0	198	11	7	16	1	12	3	8	0	13	4	0	1	0	5	8	3	10	36	0	204	108	20	12	46	76	76	24	0	5	10	0	12	0	1	9	0	29	8	11	2	13	1	6
ENSG00000049540_ELN	0	49	1	0	11	4	1	4	12	0	11	0	0	0	0	4	0	4	84	4	18	1	0	17	0	6	7	13	0	1	0	0	10	0	0	0	5	2	0	14	11	0	39	0	0	12	0	2	0
ENSG00000049541_RFC2	174	82	165	29	252	21	156	90	181	196	463	85	84	149	338	162	203	168	49	148	210	139	155	314	56	209	291	243	187	170	180	292	141	144	86	195	75	140	148	37	140	160	242	158	223	192	179	190	172
ENSG00000049618_ARID1B	1689	738	673	369	2121	441	544	1180	2725	1718	2854	1262	1338	1122	1570	1261	1468	1025	872	909	1060	1375	958	1387	606	2403	2183	1845	1377	1605	1578	2035	1194	1123	1648	1684	1217	1449	1515	720	1211	1070	1927	892	1400	1170	1217	1357	1262
ENSG00000049656_CLPTM1L	562	249	135	76	668	68	188	154	730	190	821	402	241	400	367	499	643	305	211	150	362	446	131	501	195	918	615	389	491	553	570	856	392	302	327	287	464	431	509	194	319	262	520	461	529	281	163	431	467
ENSG00000049759_NEDD4L	125	115	87	14	55	180	8	126	293	104	105	144	81	139	129	259	197	124	49	99	78	115	21	109	183	207	266	180	169	112	152	130	204	192	195	137	227	149	144	92	147	102	118	48	121	168	103	98	173
ENSG00000049768_FOXP3	0	0	0	0	0	1	0	1	0	0	8	0	0	0	0	1	0	0	0	0	0	0	0	0	0	7	8	0	0	0	0	3	2	0	0	0	0	0	0	0	0	2	0	0	0	0	0	0	0
ENSG00000049769_PPP1R3F	18	0	0	0	10	2	0	40	33	31	38	3	27	50	31	21	22	27	3	33	10	11	5	15	0	26	16	12	36	17	13	34	14	18	19	18	17	28	15	1	11	9	42	15	33	14	8	13	14
ENSG00000049860_HEXB	67	94	678	129	85	24	104	52	213	42	318	38	56	105	119	231	60	29	148	10	136	106	102	460	0	1554	1656	499	229	846	688	1319	225	72	139	125	70	212	46	63	65	44	61	41	233	260	181	52	62
ENSG00000049883_PTCD2	9	0	0	10	12	2	6	11	35	13	13	7	17	21	3	18	3	7	0	2	13	10	0	27	23	52	55	19	8	12	29	57	14	16	7	18	12	20	4	0	9	0	20	10	16	19	0	12	1
ENSG00000050030_KIAA2022	0	0	0	0	0	24	0	4	0	0	7	0	0	0	0	0	0	0	0	0	0	0	0	0	0	0	2	0	0	1	0	0	0	0	0	0	0	0	0	0	4	0	0	0	0	0	0	0	0
ENSG00000050130_JKAMP	2216	1556	981	1448	2184	1094	1401	445	2100	1192	2095	1060	1244	2007	936	641	1861	1244	881	1149	1335	1298	1369	2099	1160	1317	1354	1222	2041	899	1211	1623	1295	1905	2059	1799	2001	1357	1527	1532	1927	663	1426	1315	1811	1710	928	1299	1956
ENSG00000050165_DKK3	0	0	2	0	0	3	0	1	0	0	0	0	0	0	0	0	0	0	0	0	0	0	0	0	0	0	3	0	0	0	5	2	0	0	1	0	0	0	0	0	0	0	0	0	0	0	0	0	0
ENSG00000050327_ARHGEF5	30	16	8	70	0	15	3	3	5	0	4	9	0	0	5	74	0	0	0	0	0	0	0	87	0	25	226	46	12	66	0	39	6	0	0	11	0	20	0	0	0	0	23	0	0	0	0	0	0
ENSG00000050344_NFE2L3	10	3	64	68	44	17	29	78	60	53	26	18	0	12	12	20	33	14	0	3	16	11	3	53	26	126	133	27	41	60	36	244	39	11	13	9	18	35	8	0	11	0	58	6	41	37	8	34	19
ENSG00000050393_MCUR1	8360	8149	6819	4797	10864	9695	7861	2815	11848	8542	11257	9024	4044	11157	4712	6657	9652	12600	4649	5325	9704	9608	4026	8054	2909	5439	3646	9139	9423	12863	6989	7437	16967	15427	12301	13156	10778	9925	14808	4632	7990	5911	10682	10417	13823	17737	3907	9511	8429
ENSG00000050405_LIMA1	96	69	4	9	35	95	38	56	98	14	89	45	55	57	61	95	73	94	33	27	59	105	13	76	24	171	92	40	80	100	159	194	138	46	28	60	202	53	112	28	100	13	78	43	53	59	36	60	34
ENSG00000050426_LETMD1	69	81	36	104	222	57	74	59	156	29	126	73	78	84	102	39	91	83	171	78	79	104	135	182	50	271	188	65	154	145	169	251	133	94	142	134	106	108	105	80	110	91	123	103	141	77	56	104	85
ENSG00000050438_SLC4A8	1	6	3	0	0	1	0	0	17	0	41	0	0	0	26	13	0	0	0	0	10	0	0	12	0	110	60	13	4	35	56	92	8	0	0	2	0	9	0	0	1	0	9	0	1	6	1	0	0
ENSG00000050555_LAMC3	0	0	0	0	0	0	0	2	0	0	0	0	0	0	0	0	0	0	0	0	0	5	0	0	0	0	0	0	0	0	0	0	0	0	0	0	0	0	0	0	0	0	0	0	0	0	2	0	0
ENSG00000050628_PTGER3	31	3	0	4	26	52	0	25	58	73	132	36	35	53	48	11	34	21	6	32	30	21	69	30	18	30	16	32	48	18	45	48	27	36	44	47	48	95	47	0	51	89	59	71	43	34	17	61	61
ENSG00000050730_TNIP3	20	0	0	0	4	0	0	0	6	0	3	5	0	5	2	11	9	7	0	0	12	11	0	0	47	9	4	0	4	7	0	8	10	10	2	0	16	5	5	1	5	0	3	0	10	0	0	16	0
ENSG00000050748_MAPK9	339	108	280	140	292	101	114	154	539	407	518	299	183	201	225	384	316	238	173	116	348	359	64	465	125	614	410	420	318	327	462	450	340	464	384	535	288	621	350	152	312	200	538	294	498	426	106	363	372
ENSG00000050767_COL23A1	0	0	0	0	0	1	0	0	0	0	0	0	0	0	0	0	0	0	0	0	0	0	0	0	0	3	0	0	1	0	0	0	0	0	0	0	0	0	0	0	0	0	0	0	0	0	0	0	0
ENSG00000050820_BCAR1	1	0	0	6	0	21	0	2	1	4	0	3	0	0	1	0	1	0	0	0	3	2	8	0	3	2	0	0	2	0	2	0	4	0	1	0	0	0	1	0	1	0	0	4	1	2	7	0	0
ENSG00000051009_FAM160A2	16	45	67	14	11	7	5	11	66	3	72	0	0	0	20	113	0	9	2	1	3	0	2	104	0	541	406	132	68	101	167	352	31	3	0	37	0	40	0	0	8	0	26	10	4	14	2	3	8
ENSG00000051108_HERPUD1	147	155	248	73	92	26	47	33	124	13	144	70	22	53	58	175	54	22	18	25	18	36	131	260	49	926	1339	375	111	295	398	501	117	43	36	87	61	56	19	12	33	47	53	33	65	150	13	54	31
ENSG00000051128_HOMER3	0	2	18	0	0	10	1	0	0	0	0	0	0	0	0	2	0	6	3	0	0	1	0	4	2	2	10	14	13	3	1	4	1	0	0	1	0	0	0	0	0	0	0	1	3	1	4	0	0
ENSG00000051180_RAD51	0	21	0	44	0	33	1	0	30	0	2	0	0	0	21	10	31	2	0	0	19	2	0	17	0	35	32	7	8	18	29	10	6	3	40	2	4	4	0	37	17	0	15	0	5	74	9	10	17
ENSG00000051341_POLQ	212	48	94	22	143	101	177	50	156	177	122	200	199	257	115	122	189	184	11	114	189	199	89	206	35	117	196	182	207	175	185	213	175	252	365	242	288	266	215	78	193	135	179	208	302	299	59	207	153
ENSG00000051382_PIK3CB	9128	5595	4544	3547	9745	4456	6006	4546	10626	7872	15101	9112	5349	8702	6828	5712	13000	8849	2400	3716	8506	7997	3001	8033	3958	4785	6690	11170	9266	7827	7167	7855	8560	7811	10904	10026	9383	8459	8618	3961	7439	4244	11801	11271	8329	11703	5293	11496	15969
ENSG00000051523_CYBA	120	801	1373	827	560	32	187	60	1186	77	895	55	179	70	327	934	188	91	650	168	188	51	67	1666	146	7223	4318	1737	563	1249	2258	3754	657	39	36	139	298	568	84	116	195	68	341	261	348	438	31	163	24
ENSG00000051596_THOC3	19	0	0	0	19	222	3	29	62	5	60	23	3	43	23	2	32	85	0	1	12	19	56	102	6	364	157	34	75	110	125	220	84	0	14	0	2	43	66	17	11	2	23	0	24	24	38	3	5
ENSG00000051620_HEBP2	6	30	90	133	91	86	51	0	22	43	51	10	0	13	10	91	28	8	42	24	21	16	42	102	0	197	345	166	58	116	40	154	69	21	33	20	29	9	12	4	11	13	31	11	38	32	0	15	13
ENSG00000051825_MPHOSPH9	842	532	356	239	565	310	210	332	1035	789	606	787	643	965	670	770	886	845	275	376	805	856	289	796	334	1752	968	1010	1018	1028	904	1420	1085	1252	1272	937	945	1147	1094	292	785	539	1273	755	1137	1032	643	1100	979
ENSG00000052126_PLEKHA5	917	337	470	275	652	662	611	283	1001	845	1118	747	614	1086	928	633	1104	780	278	430	853	706	277	794	220	633	507	733	828	581	480	851	834	824	1019	452	1061	772	836	339	820	491	671	788	864	833	750	794	1004
ENSG00000052344_PRSS8	0	0	0	0	0	17	0	1	0	0	0	0	0	0	0	0	0	0	0	0	1	0	0	0	0	1	2	0	0	5	0	2	0	0	0	0	0	0	0	0	1	0	0	0	0	0	0	0	0
ENSG00000052723_SIKE1	35	18	34	0	6	4	0	3	46	1	42	14	1	8	28	4	21	9	35	16	6	18	19	23	0	213	113	22	15	39	66	155	43	19	5	5	25	35	9	25	12	0	22	5	23	15	0	9	18
ENSG00000052749_RRP12	2	55	46	194	8	37	15	8	59	7	34	2	15	3	3	122	0	4	49	2	8	2	0	90	13	254	1054	365	76	115	140	65	48	2	0	21	2	21	7	0	2	11	27	9	10	26	4	0	8
ENSG00000052795_FNIP2	48	38	1	0	52	3	25	49	129	84	165	17	39	24	64	118	85	64	14	62	59	28	54	86	0	468	291	99	108	120	106	344	87	48	67	75	44	119	47	2	63	30	48	41	48	63	78	36	15
ENSG00000052802_MSMO1	13	52	1	0	12	35	0	0	53	5	38	2	19	14	15	28	13	27	28	0	14	1	0	34	0	113	74	15	27	45	73	121	35	12	5	7	15	24	7	0	17	16	36	15	4	4	3	8	17
ENSG00000052841_TTC17	204	146	309	134	140	8	158	66	439	148	388	138	201	170	251	232	182	108	54	74	175	171	39	423	150	1528	1056	326	310	513	651	1130	337	256	271	199	228	304	184	115	185	156	265	142	189	223	93	151	175
ENSG00000052850_ALX4	0	0	0	0	0	2	0	0	0	0	0	0	0	0	0	0	0	0	0	0	0	0	0	0	0	0	0	0	0	0	0	5	0	0	0	0	0	0	0	0	0	0	0	0	0	0	0	0	0
ENSG00000053108_FSTL4	204	73	1	4	90	36	22	107	121	262	243	119	115	86	192	71	139	145	79	167	188	161	148	121	101	107	151	167	134	80	180	195	99	100	170	229	404	166	256	102	170	125	119	161	219	202	74	172	189
ENSG00000053254_FOXN3	184	16	50	29	121	43	82	107	171	134	364	116	75	155	122	139	183	97	13	30	117	132	49	183	50	375	364	235	176	226	242	298	151	143	133	161	156	182	176	59	57	114	134	114	81	132	81	114	174
ENSG00000053328_METTL24	7	0	0	0	0	1	0	0	0	0	7	0	0	4	0	16	35	14	0	0	24	0	0	14	0	15	3	1	5	3	1	0	7	0	1	0	3	9	7	5	0	0	1	0	0	15	0	4	13
ENSG00000053371_AKR7A2	3460	865	570	380	5237	327	1351	1303	2567	1329	8107	1677	536	1203	1799	1628	2244	2206	599	592	1727	1831	1729	2039	807	1249	835	1445	993	1045	2461	1471	1841	1912	1364	1477	2230	1699	2226	623	1819	872	1944	3262	3626	1739	617	3230	1649
ENSG00000053372_MRTO4	5	1	94	35	11	22	0	19	8	0	13	0	0	1	0	0	0	0	0	0	6	2	0	18	0	90	34	9	14	24	33	46	6	3	0	12	1	3	1	0	4	0	14	0	0	1	4	0	0
ENSG00000053438_NNAT	0	0	0	0	0	1	0	0	0	0	0	0	0	0	0	0	0	0	0	0	0	0	0	0	0	1	0	0	0	0	0	1	0	0	0	0	0	0	0	0	0	0	0	0	0	0	1	0	0
ENSG00000053501_USE1	3	0	37	4	28	7	58	1	18	0	20	2	0	1	16	20	9	1	8	16	5	1	0	30	1	76	48	29	6	36	8	60	5	6	0	1	2	7	6	0	4	0	8	0	9	1	0	0	16
ENSG00000053524_MCF2L2	342	213	358	174	461	233	21	149	824	609	397	544	372	422	455	373	733	488	496	522	457	525	191	934	99	398	326	429	371	360	504	543	503	636	802	589	815	880	570	176	527	314	463	561	715	739	700	775	559
ENSG00000053702_NRIP2	0	0	0	0	3	1	0	2	0	0	11	0	0	0	0	0	0	0	0	0	0	0	0	0	0	14	8	1	1	3	0	5	0	0	0	0	0	1	0	0	0	0	0	0	0	0	0	3	0
ENSG00000053747_LAMA3	0	14	17	46	1	8	12	8	74	0	0	60	1	16	0	0	0	23	0	0	1	18	0	0	0	27	6	2	4	4	29	0	3	10	5	0	0	13	1	0	2	5	11	7	5	5	39	7	8
ENSG00000053770_AP5M1	621	300	356	227	587	67	316	263	608	518	667	412	649	533	697	327	414	526	104	167	452	605	225	693	147	868	668	632	498	617	463	920	675	394	745	580	891	543	544	333	606	339	520	505	693	673	379	651	668
ENSG00000053900_ANAPC4	101	38	279	68	55	105	13	27	150	48	79	59	27	75	215	111	118	118	0	72	96	77	140	255	89	916	686	134	154	316	322	744	186	110	178	61	148	244	70	17	95	64	108	72	110	167	35	72	77
ENSG00000053918_KCNQ1	0	22	47	24	0	5	1	0	1	0	131	0	0	0	2	15	5	0	17	0	0	0	0	99	0	85	374	110	30	71	26	43	24	0	0	6	0	0	7	0	0	0	0	0	15	79	0	1	0
ENSG00000054116_TRAPPC3	206	9	142	105	144	96	130	99	101	63	244	55	66	124	66	65	115	51	18	93	73	121	78	137	38	233	243	143	174	153	147	195	146	82	84	114	155	112	109	54	81	97	128	132	82	118	64	94	135
ENSG00000054118_THRAP3	771	365	331	228	771	193	618	316	1145	336	1013	469	398	494	570	656	695	548	340	605	409	464	296	847	365	2237	2092	894	812	1014	1177	1772	837	515	535	507	394	731	702	293	562	715	741	578	594	541	340	338	453
ENSG00000054148_PHPT1	6	13	51	43	29	19	0	0	12	8	28	0	0	0	6	33	0	0	10	0	8	4	17	12	2	192	62	15	13	19	16	82	7	6	0	0	2	29	2	1	4	19	29	5	1	6	8	4	0
ENSG00000054179_ENTPD2	0	0	0	0	0	0	0	0	0	0	0	0	1	0	0	7	0	0	0	0	0	0	0	0	0	0	2	3	0	1	0	0	0	0	0	0	0	0	2	0	0	0	0	0	0	0	0	0	0
ENSG00000054219_LY75	14	46	156	129	99	1	9	117	452	9	237	37	9	104	218	426	88	54	5	0	52	39	38	647	19	2596	2584	745	293	754	789	1898	267	15	81	66	23	241	12	37	91	4	91	40	86	190	1	21	41
ENSG00000054267_ARID4B	758	442	512	499	488	255	234	442	872	513	829	479	236	526	762	795	550	534	275	358	410	611	232	1162	240	3386	3935	1485	880	1236	1098	2566	1064	704	822	634	1101	1197	625	337	638	416	772	469	662	867	340	676	648
ENSG00000054277_OPN3	28	0	0	52	26	18	0	0	9	55	19	22	0	36	38	18	28	17	0	26	5	47	1	19	0	86	69	42	13	41	36	45	21	20	22	7	0	22	3	1	12	23	21	18	16	13	0	38	18
ENSG00000054282_SDCCAG8	1067	441	549	732	901	693	501	564	1426	1202	1213	734	751	869	1117	741	879	1324	553	816	1561	1496	1013	1105	788	666	768	1061	1048	1037	793	1073	1228	1238	1884	1326	1016	1556	1567	368	877	1243	1596	965	1215	1186	904	1663	1217
ENSG00000054356_PTPRN	121	72	31	60	201	16	51	204	423	109	142	220	50	72	107	220	193	94	45	66	115	109	59	51	65	76	55	122	147	98	95	94	179	139	64	217	123	49	197	84	73	135	267	75	127	149	54	111	117
ENSG00000054392_HHAT	0	0	0	0	0	1	0	0	0	0	0	0	0	0	0	0	0	0	0	0	0	1	0	1	0	3	22	0	5	5	1	12	2	0	23	0	17	8	0	0	0	0	0	3	0	0	0	0	0
ENSG00000054523_KIF1B	2824	1409	113	923	1663	759	1383	2250	5694	2955	4351	3362	2652	1482	3990	3391	2568	1830	1410	1066	3393	2807	1269	3136	2018	2419	4080	4649	4036	4079	3198	3761	4489	2528	3594	3323	1505	2334	3269	743	1780	2390	5027	2490	3627	2107	1766	3235	1626
ENSG00000054598_FOXC1	162	2	5	2	8	63	2	10	161	0	46	105	54	61	61	89	85	36	0	17	113	70	0	19	13	53	16	100	43	58	28	82	173	88	46	84	86	3	88	49	62	7	48	17	41	166	23	16	119
ENSG00000054611_TBC1D22A	844	309	96	270	755	182	399	432	1087	410	881	575	447	402	606	535	578	456	220	366	502	474	123	545	349	988	1021	653	607	604	676	764	670	506	494	649	442	454	636	225	468	272	558	498	579	716	312	689	678
ENSG00000054654_SYNE2	1361	2194	2198	1617	2714	65	649	578	11213	291	6003	230	235	122	5660	5209	226	166	1254	154	1659	177	157	8336	357	58332	29157	7532	4577	11610	21123	44992	7332	149	298	823	385	5658	381	66	2068	187	2694	444	1178	1911	278	111	233
ENSG00000054690_PLEKHH1	0	0	2	0	0	31	0	1	6	0	0	0	0	0	0	0	0	0	0	0	0	0	0	1	0	4	4	0	1	1	0	1	0	0	0	0	0	0	0	0	0	0	0	0	0	0	1	0	0
ENSG00000054793_ATP9A	36	64	36	81	91	27	15	27	137	42	103	26	43	33	93	44	37	20	24	32	32	57	13	107	67	399	101	61	69	80	66	276	43	39	49	52	35	41	39	41	44	51	50	31	35	40	16	15	53
ENSG00000054796_SPO11	0	0	0	0	0	0	0	0	0	0	0	0	0	0	0	0	0	0	0	0	0	0	0	0	0	0	0	0	0	0	0	0	0	0	0	0	0	0	0	0	0	0	0	0	0	0	0	0	0
ENSG00000054803_CBLN4	0	0	0	0	0	1	0	0	0	0	0	0	0	0	0	0	0	0	0	0	0	0	0	0	0	0	0	0	0	0	0	0	0	0	0	0	0	0	0	0	0	0	0	0	0	0	0	0	0
ENSG00000054938_CHRDL2	0	1	0	0	0	0	0	0	0	0	0	0	0	0	0	0	0	0	0	0	0	0	0	0	0	0	0	0	0	0	0	0	0	0	0	0	0	0	0	0	0	11	0	0	0	0	0	0	0
ENSG00000054965_FAM168A	9	2	7	17	15	15	4	0	22	11	21	4	10	16	27	7	9	18	0	9	11	12	6	10	0	42	38	11	25	22	13	28	18	6	9	2	9	15	10	6	10	16	12	8	10	35	18	5	9
ENSG00000054967_RELT	0	20	13	58	0	25	0	2	10	21	20	0	0	0	3	77	0	0	11	2	3	0	0	70	0	210	888	259	55	105	62	65	51	4	0	6	1	7	0	0	1	5	18	6	9	13	1	0	3
ENSG00000054983_GALC	76	214	81	175	113	6	82	66	289	66	410	51	106	54	82	185	141	157	41	35	84	89	71	367	40	1515	739	313	183	361	416	907	152	163	152	155	87	224	47	144	141	210	228	118	89	100	86	132	107
ENSG00000055044_NOP58	87	268	181	105	86	84	31	18	352	102	150	85	32	110	224	116	68	69	211	119	93	172	171	173	47	858	466	124	132	199	386	660	155	156	94	141	72	162	79	132	97	75	191	58	111	160	117	95	120
ENSG00000055070_SZRD1	716	457	407	307	749	450	560	433	1218	497	1077	639	414	518	621	766	664	730	590	448	720	625	574	623	467	612	478	486	665	578	486	577	715	605	575	657	472	490	915	580	450	890	803	587	749	560	373	603	621
ENSG00000055118_KCNH2	14	0	0	58	0	6	0	15	0	0	0	1	0	12	0	23	0	0	0	0	0	0	0	0	0	5	36	5	1	5	11	17	2	0	0	0	0	0	0	0	0	0	0	0	2	1	0	0	0
ENSG00000055130_CUL1	842	343	294	230	490	153	559	209	658	343	1117	395	438	535	446	376	583	566	201	234	403	551	258	775	377	1404	797	613	557	606	675	1191	535	504	554	523	716	617	539	185	442	358	441	476	525	479	255	448	478
ENSG00000055147_FAM114A2	674	456	416	218	563	464	486	486	991	865	520	766	662	830	860	627	984	382	307	493	766	748	514	559	166	572	663	734	834	730	733	837	644	812	774	1114	946	1205	1003	265	784	799	752	736	855	933	754	1241	732
ENSG00000055163_CYFIP2	229	102	261	243	318	25	38	231	1648	248	1075	141	36	63	445	883	90	61	269	40	182	39	59	1538	38	7641	3678	803	553	1304	2296	5000	832	32	45	210	64	622	127	46	275	75	637	91	247	247	35	151	51
ENSG00000055208_TAB2	25288	10021	8176	5598	18803	7984	11427	7790	32612	20983	35718	21303	14859	19942	19301	16595	26146	24337	5132	9435	16638	22306	5311	17738	9437	15383	17904	27112	22511	20737	19312	18572	22812	20981	28443	24916	18119	21289	20671	7906	18096	14929	21743	17195	18423	20123	11947	17763	24396
ENSG00000055211_GINM1	298	303	283	262	486	207	279	251	550	447	739	286	236	440	412	358	421	384	75	196	399	349	250	468	239	408	414	410	455	399	250	389	488	420	631	410	444	524	495	275	370	255	371	390	558	522	295	429	454
ENSG00000055332_EIF2AK2	189	159	183	126	117	71	153	137	317	93	495	80	137	85	101	234	207	83	132	36	227	135	66	271	58	590	769	358	218	231	340	424	280	198	67	130	348	175	109	67	175	78	263	177	127	135	83	186	289
ENSG00000055483_USP36	42	46	33	14	1	18	1	2	151	26	83	8	4	18	40	81	23	5	0	4	16	31	30	94	35	712	346	81	48	134	264	455	72	27	16	21	6	47	8	13	14	34	65	15	27	54	4	8	6
ENSG00000055609_KMT2C	21404	8452	6604	3854	16855	4935	6819	12723	24013	17988	22327	20180	9420	16869	16455	15097	23806	14486	3831	6015	15714	17813	5025	15740	7463	18673	25240	22971	18577	18135	18378	20576	20015	14304	24676	18594	24001	25055	17033	4894	16719	11046	21756	14256	18178	21336	11623	20684	17575
ENSG00000055732_MCOLN3	0	0	0	0	0	3	0	0	0	0	0	0	0	0	0	0	0	0	0	0	0	0	0	0	0	0	0	0	0	2	11	0	0	0	0	0	0	0	0	0	0	0	0	0	0	0	17	0	0
ENSG00000055813_CCDC85A	6	7	0	0	0	1	0	1	1	24	13	8	0	0	14	3	22	0	15	1	2	3	0	4	3	0	7	3	11	3	0	1	6	1	7	0	5	1	1	0	2	21	4	1	10	15	0	18	5
ENSG00000055917_PUM2	5038	2157	2040	1475	3596	1654	1972	2547	5862	3737	6071	3956	3627	4321	4360	4164	5865	3496	1797	1645	3499	4180	1867	4378	2300	5921	6383	5472	6196	5767	4837	6228	5182	4002	5269	4932	4488	4429	4400	2141	3976	3583	5666	4444	5216	4364	2112	3706	4068
ENSG00000055950_MRPL43	4	24	46	0	67	20	0	0	31	10	91	7	1	8	38	16	7	11	6	2	9	10	17	63	0	227	89	51	22	63	20	143	16	0	5	33	28	17	37	21	10	8	43	12	40	19	58	13	2
ENSG00000055955_ITIH4	1	0	27	54	6	5	0	1	16	0	24	0	7	0	9	7	0	0	0	4	11	0	0	20	0	112	182	25	10	27	26	39	13	2	1	12	2	6	0	0	7	1	6	3	3	12	0	3	1
ENSG00000055957_ITIH1	0	0	0	0	0	1	0	0	0	0	0	0	0	0	0	0	0	0	0	0	0	0	0	0	0	0	1	0	1	1	0	2	0	0	0	0	0	0	0	0	0	0	1	0	0	0	0	0	0
ENSG00000056050_C4orf27	0	41	10	54	5	2	0	20	32	3	10	1	10	38	37	11	12	8	14	2	17	13	9	58	25	136	81	27	13	43	40	135	25	13	25	16	17	19	14	16	10	28	20	9	29	18	2	17	26
ENSG00000056097_ZFR	1526	820	689	327	1126	223	556	675	1820	874	2344	1178	779	1362	1293	1275	1800	1024	348	753	1285	1237	754	1473	610	2185	1717	1318	1246	1481	1448	2054	1651	1267	1440	1368	1878	1532	1478	683	1161	996	1666	1307	1337	1416	748	1336	1560
ENSG00000056277_ZNF280C	75	24	1	8	19	1	0	0	31	65	6	11	0	11	78	55	60	24	0	0	37	6	34	94	0	199	85	39	34	59	55	118	27	27	30	43	14	45	15	2	43	28	38	9	29	42	39	24	5
ENSG00000056291_NPFFR2	0	0	0	0	0	1	0	1	0	0	0	0	0	0	0	0	0	0	0	0	0	1	0	0	0	0	0	0	0	0	0	0	0	0	0	0	0	0	0	0	0	0	0	0	0	0	0	0	0
ENSG00000056487_PHF21B	0	0	0	0	0	1	0	0	0	0	0	0	0	0	0	0	0	0	0	0	0	0	0	0	0	0	0	0	0	0	0	0	0	0	0	0	0	0	0	0	0	0	0	0	0	0	0	0	0
ENSG00000056558_TRAF1	12	27	3	9	10	3	0	0	32	0	21	0	1	0	11	15	0	0	2	0	14	6	0	9	0	177	88	23	19	49	108	139	14	0	0	0	0	17	3	0	10	0	14	0	5	22	0	0	0
ENSG00000056586_RC3H2	9187	2764	1629	1518	7005	2204	4490	4742	10264	6924	9533	7962	6475	9594	7041	6053	10606	8829	2745	2506	6948	8663	1620	6291	3806	5001	4884	8770	9336	8132	6813	7136	10235	8781	9924	8501	12363	8126	8773	2641	8062	3735	8143	8409	8843	8781	4783	8501	9460
ENSG00000056661_PCGF2	16	0	0	1	0	18	273	10	27	11	7	0	21	0	6	0	0	6	0	6	0	1	0	10	63	0	6	8	13	1	0	1	1	4	18	6	6	9	14	0	0	0	0	9	15	0	1	9	7
ENSG00000056736_IL17RB	0	0	0	0	8	1	0	8	2	0	0	2	1	1	1	5	0	3	0	4	0	0	0	1	0	12	5	1	8	2	3	5	1	0	1	0	1	0	1	0	0	0	0	2	9	4	0	0	0
ENSG00000056972_TRAF3IP2	0	0	0	0	3	2	0	0	23	0	6	0	0	0	0	0	0	4	0	0	1	1	0	7	2	55	46	26	11	15	14	23	4	0	1	0	0	0	0	0	0	0	2	0	0	0	0	0	0
ENSG00000056998_GYG2	0	0	0	0	0	4	0	0	1	0	0	0	0	0	0	0	0	0	0	0	0	0	0	0	0	0	0	0	0	0	0	0	0	0	0	0	0	0	0	0	0	0	0	0	0	0	0	0	0
ENSG00000057019_DCBLD2	113	95	21	5	70	78	61	24	88	84	124	84	16	130	39	51	62	156	14	42	118	83	0	116	57	63	70	92	56	73	153	94	113	137	144	137	97	164	77	88	139	150	184	96	75	122	180	123	106
ENSG00000057149_SERPINB3	0	0	2	0	0	0	1	0	0	0	0	0	0	0	0	0	0	0	0	6	0	0	0	0	0	0	0	0	0	0	0	0	0	0	0	0	0	0	0	0	0	0	0	0	0	0	0	0	2
ENSG00000057252_SOAT1	194	142	368	117	446	295	258	105	442	354	315	327	317	289	286	158	301	309	62	91	324	301	204	504	113	1103	1128	512	347	444	873	986	421	512	490	379	261	500	213	116	201	116	483	258	299	463	172	411	335
ENSG00000057294_PKP2	205	161	21	61	177	39	267	216	252	274	405	319	104	592	160	209	693	350	94	330	457	351	142	384	155	232	286	328	583	407	145	403	339	279	566	352	670	241	283	81	444	167	339	383	530	512	222	417	232
ENSG00000057468_MSH4	6	0	0	0	5	5	0	1	3	3	0	18	14	12	9	10	0	9	0	7	6	5	0	4	0	14	3	2	15	11	1	6	6	25	10	2	4	17	8	0	4	7	7	9	5	16	4	13	14
ENSG00000057593_F7	0	0	0	0	0	1	0	0	0	0	0	0	0	0	0	0	0	0	0	0	0	0	0	0	0	0	0	0	0	0	0	0	0	0	0	0	0	0	0	0	0	0	0	0	0	0	0	0	0
ENSG00000057608_GDI2	1837	1669	3313	1489	1905	1482	1092	957	2739	2103	2684	1807	1491	1910	1788	1478	2527	2066	1281	1535	1883	2134	1262	2901	990	2939	3275	2301	1990	2125	2178	3134	2151	2646	2876	2566	2577	3276	2116	1218	1849	1638	2526	1791	2629	2629	1087	2742	2347
ENSG00000057657_PRDM1	31	80	16	27	61	18	23	42	349	0	167	17	18	0	111	131	0	0	0	1	35	2	29	356	8	1155	845	257	82	260	593	862	183	3	1	9	22	120	7	1	36	2	67	5	25	27	1	0	0
ENSG00000057663_ATG5	104	28	148	39	92	31	4	31	159	127	179	75	50	155	153	35	167	134	74	55	122	93	62	201	57	351	230	97	153	160	245	364	183	138	149	184	185	152	92	44	113	107	124	114	140	168	19	160	130
ENSG00000057704_TMCC3	0	0	4	37	0	1	0	0	11	0	18	0	0	0	0	29	5	0	11	8	13	0	7	31	0	207	389	105	22	46	79	103	19	0	1	5	1	21	0	0	1	0	13	0	4	7	2	2	10
ENSG00000057757_PITHD1	352	164	62	59	192	24	145	86	275	139	381	176	286	162	185	586	382	310	109	141	173	163	67	221	149	759	2361	325	548	392	188	423	285	194	157	169	246	186	460	195	177	158	231	300	318	167	48	202	255
ENSG00000057935_MTA3	176	3	153	73	209	60	80	37	292	88	310	43	255	117	80	83	90	160	50	59	150	92	134	157	0	308	150	132	112	104	151	203	133	115	225	60	122	194	65	22	89	77	145	64	162	64	33	191	203
ENSG00000058056_USP13	6	0	0	6	6	6	0	0	33	46	29	14	16	45	0	33	10	17	0	14	10	12	0	14	1	56	74	14	25	36	70	69	24	38	12	9	9	20	25	0	18	0	13	21	22	10	16	5	21
ENSG00000058063_ATP11B	3628	2914	2509	1910	7529	1410	1015	2435	6070	1946	13190	3790	3419	2370	2291	4239	4988	2561	864	1523	1879	2126	1600	1883	2016	4580	5408	4434	5608	8177	5018	4958	4345	4833	4393	5059	2659	3835	5903	1077	3372	3929	2416	4447	2117	4629	1644	4482	3996
ENSG00000058085_LAMC2	9	4	6	1	0	46	13	0	4	0	0	0	16	1	16	1	0	0	0	0	0	7	0	0	0	0	1	0	0	0	29	0	0	0	0	0	0	0	0	0	0	0	0	0	0	5	36	3	1
ENSG00000058091_CDK14	1267	658	912	523	1115	713	667	947	1287	1738	2326	1108	1025	1294	1181	1066	1905	1480	630	624	1079	1231	653	1151	802	687	1158	1548	1714	1427	675	788	996	1403	1384	979	1017	1480	1023	664	986	1087	1168	1243	1133	1315	700	1420	1482
ENSG00000058262_SEC61A1	600	261	377	199	598	304	465	328	851	242	1094	186	623	518	546	542	687	492	160	371	547	654	309	736	102	1637	1031	538	695	682	816	1125	619	561	459	453	494	552	694	314	581	407	471	480	606	292	409	465	606
ENSG00000058272_PPP1R12A	4434	2050	788	1310	3041	1192	1327	2094	4781	3776	6132	3041	2294	4305	3629	2940	4371	3508	1484	1685	3393	4846	1069	4154	1414	5885	6353	5603	4414	4347	4084	6489	4786	4727	4951	4045	5282	4613	3121	1267	3757	1637	3463	2908	4240	5278	1623	4080	4069
ENSG00000058335_RASGRF1	0	0	0	0	0	2	0	5	0	0	0	0	0	0	0	0	0	0	0	0	0	0	0	0	0	0	0	0	0	0	0	0	0	0	0	0	0	0	0	0	0	0	0	0	0	0	4	0	0
ENSG00000058404_CAMK2B	0	0	0	0	0	1	1	1	0	0	0	0	0	0	0	0	0	0	0	0	0	0	0	0	0	0	2	0	0	0	0	0	0	0	0	0	0	0	0	0	0	0	0	0	0	0	0	0	0
ENSG00000058453_CROCC	0	8	27	1	4	3	3	11	70	2	65	1	0	7	14	21	4	0	0	2	10	4	0	46	0	250	153	17	36	68	154	249	27	0	14	4	12	23	1	0	19	2	16	6	6	2	0	0	4
ENSG00000058600_POLR3E	103	61	144	66	237	105	87	78	197	53	206	22	68	51	201	141	100	55	29	32	49	53	73	238	97	569	317	135	131	185	199	393	108	32	101	137	51	77	33	42	143	123	132	49	90	96	31	100	25
ENSG00000058668_ATP2B4	88	81	400	324	231	28	61	75	1489	108	636	96	4	53	367	351	40	96	163	0	166	77	35	1127	0	6686	3519	724	597	1246	2139	4613	755	51	81	101	70	393	105	56	219	92	292	69	306	288	32	53	28
ENSG00000058673_ZC3H11A	14476	6066	3427	4086	13320	4520	5820	8375	17925	10233	16887	15092	9610	11270	10140	11407	12321	10496	2851	4231	11982	10749	3074	12254	6752	13329	15245	17106	13975	13316	11066	17739	13674	11348	14955	13918	12768	9765	13786	6076	11927	6047	16042	10469	12709	13296	5637	10816	10755
ENSG00000058729_RIOK2	23	33	50	1	0	5	1	0	55	0	43	0	0	5	15	17	12	15	27	0	2	22	0	72	0	311	191	34	36	107	130	262	24	4	0	13	12	16	0	0	8	25	18	0	18	22	0	0	10
ENSG00000058799_YIPF1	29	87	0	15	76	5	66	28	104	16	199	49	38	11	37	73	17	59	0	2	39	52	76	73	0	216	279	145	91	63	99	128	77	53	70	73	68	57	52	29	28	39	33	63	71	46	14	19	65
ENSG00000058804_NDC1	198	64	40	35	151	173	184	88	322	302	198	252	246	229	184	63	178	198	78	61	196	183	58	254	106	239	167	270	188	191	213	239	201	235	360	239	215	323	190	41	134	137	231	226	232	241	238	272	266
ENSG00000058866_DGKG	2827	999	1021	603	1688	511	1221	1968	2179	1562	2885	1474	1443	2146	1561	1636	2729	1338	735	1166	1779	2133	770	2029	799	1438	1170	2361	1887	1481	2006	1848	2360	1538	2296	2050	2683	1416	1773	680	2201	988	1995	2023	2211	2478	791	1899	2092
ENSG00000059122_FLYWCH1	13	2	14	5	27	11	1	15	82	25	48	9	0	11	37	35	10	1	4	0	14	21	1	31	26	292	137	33	40	53	83	328	46	8	16	3	13	30	23	9	12	12	24	7	13	24	33	15	9
ENSG00000059145_UNKL	70	54	16	21	59	31	0	43	122	22	108	29	17	26	37	92	37	37	93	19	24	63	16	40	10	322	283	115	78	90	82	144	59	45	54	48	74	80	36	9	28	44	87	44	39	73	52	61	67
ENSG00000059377_TBXAS1	9048	3710	3757	3340	5964	3563	5473	6647	7689	6224	11182	5406	4199	5492	6320	4768	7054	4744	4788	5597	5244	7240	4206	8328	3457	6153	9062	7839	7597	5341	5811	7769	5554	5631	8184	6434	10301	6097	7117	3061	6341	4626	7006	5772	9092	6796	2945	5406	6202
ENSG00000059378_PARP12	57	29	63	95	40	14	64	98	260	12	386	90	42	6	67	125	15	21	33	11	48	15	19	171	21	837	481	124	88	185	221	511	115	33	34	79	280	86	41	24	55	68	153	32	43	47	88	24	47
ENSG00000059573_ALDH18A1	35	64	110	141	33	201	1	9	160	7	162	8	0	42	50	45	4	8	87	1	20	9	16	118	0	707	348	75	46	146	101	491	43	7	16	54	9	67	11	0	15	0	26	30	2	19	23	22	10
ENSG00000059588_TARBP1	26	123	131	2	30	72	4	81	98	46	82	57	31	40	86	90	21	30	42	13	51	34	2	197	47	470	421	140	111	170	168	407	97	59	79	85	98	117	45	21	56	36	109	74	86	126	39	78	77
ENSG00000059691_PET112	0	0	0	0	0	9	6	0	45	0	13	0	0	5	10	10	0	0	0	4	0	1	0	31	0	79	43	16	2	28	29	33	6	0	0	7	8	0	0	6	0	10	1	1	8	20	0	0	1
ENSG00000059728_MXD1	2093	235	470	436	861	340	501	884	1556	1013	1255	977	721	1172	789	948	924	871	367	636	697	846	170	1388	286	1540	3059	2291	1034	1145	1245	904	1543	800	929	1141	1703	813	730	496	1456	249	688	579	1105	1326	455	837	720
ENSG00000059758_CDK17	2733	740	940	1214	1820	644	1243	880	2476	1642	3224	1753	1133	2119	1446	1494	2198	1696	677	977	1425	1880	560	2452	775	2703	2232	2416	2219	1818	1848	2528	1604	1447	2851	2274	2622	2860	1343	993	1910	964	2328	1762	1916	2300	1533	1784	1738
ENSG00000059769_DNAJC25	0	21	1	1	4	1	0	5	3	0	16	0	16	1	8	2	0	0	0	0	2	13	0	9	0	48	44	15	3	14	7	11	7	3	7	13	6	3	2	4	11	0	6	2	3	0	0	1	5
ENSG00000059804_SLC2A3	43333	20629	18332	14855	26001	15301	28613	17870	39847	23981	49503	22885	19969	25169	25547	17314	29215	19589	14084	19831	19231	24998	10790	29555	12160	17876	18865	33841	25735	21855	25488	27146	25898	22469	27070	30899	49164	21588	21901	20627	30246	13448	18620	23020	33163	31128	11974	20717	26834
ENSG00000059915_PSD	0	0	0	0	0	4	0	3	0	0	0	0	0	1	1	0	14	0	0	0	0	4	0	9	0	2	6	1	11	4	0	9	0	2	0	2	0	0	0	0	0	1	0	0	0	2	1	3	0
ENSG00000060069_CTDP1	158	5	366	95	113	7	1	56	383	66	362	59	65	78	88	141	107	89	8	8	119	80	62	225	167	807	686	371	148	260	295	493	151	62	120	83	80	118	127	27	59	77	117	29	94	224	19	94	70
ENSG00000060138_YBX3	3587	1327	1441	1206	3682	2253	2164	2501	3802	4249	5383	2835	3648	4357	3438	8933	4926	3842	2469	1941	3605	3354	2951	3132	3552	2919	8470	5746	6169	4784	3433	4105	3624	3695	3511	3181	4844	2929	4608	1911	2710	3498	3745	3436	4049	3097	1799	3359	3300
ENSG00000060140_STYK1	11	4	0	0	16	63	0	0	46	32	3	14	0	24	36	15	18	11	0	0	16	5	11	7	85	85	30	27	27	22	63	57	21	2	1	11	0	25	3	0	18	0	4	0	9	7	0	21	18
ENSG00000060237_WNK1	11870	4495	4456	2393	9874	2276	3853	7688	14672	7090	16383	7487	6517	10974	11249	18699	15403	8936	3378	2808	9164	8377	2294	8694	5050	15503	35190	13552	19190	14874	10390	14064	11583	7476	9582	9276	7002	7860	9299	2930	7848	5882	11797	8417	8066	7469	6206	11959	10702
ENSG00000060303_RPS17P5	0	0	0	0	0	0	0	0	0	0	0	0	0	0	0	0	0	0	0	0	0	0	0	0	0	0	0	0	0	0	0	0	0	0	0	0	0	0	0	0	0	0	0	0	0	0	0	0	0
ENSG00000060339_CCAR1	1082	949	1062	859	914	601	349	474	1431	1360	1356	1032	890	1121	1356	1093	1468	1269	856	787	1087	1135	888	1864	754	2651	1986	1304	1351	1585	1522	2457	1437	1907	2167	1658	1459	2446	1465	913	1277	846	1369	1056	1404	1787	1156	1703	1545
ENSG00000060491_OGFR	112	115	71	243	46	44	22	143	272	2	311	27	18	20	237	310	31	12	57	23	54	12	62	386	19	1681	1228	415	169	396	560	975	214	22	1	171	220	94	23	56	58	79	109	43	135	100	82	27	35
ENSG00000060558_GNA15	1101	720	533	206	1216	461	414	650	1878	737	1957	790	702	650	889	671	1007	610	520	507	805	936	711	710	564	346	450	1443	1145	784	704	767	742	949	1307	889	877	635	1175	406	870	367	1384	576	775	1038	619	981	533
ENSG00000060566_CREB3L3	0	0	0	0	0	3	0	1	0	0	0	0	0	0	0	0	0	0	0	0	0	0	0	3	0	15	0	0	0	0	0	10	0	0	0	0	0	0	0	0	0	0	0	0	0	0	1	0	0
ENSG00000060642_PIGV	32	41	20	10	31	44	0	16	70	5	49	3	0	25	17	12	21	4	41	12	9	10	0	37	9	96	53	26	21	36	75	138	22	7	14	5	5	12	9	0	12	3	16	4	20	10	1	8	11
ENSG00000060656_PTPRU	1	0	2	1	5	22	0	6	1	0	0	0	0	0	0	0	0	0	7	0	0	8	0	3	0	7	0	0	2	0	0	3	3	0	0	0	0	0	0	0	0	0	0	2	0	0	0	0	0
ENSG00000060688_SNRNP40	170	199	108	117	251	87	170	143	338	165	378	155	119	90	140	130	217	192	43	142	197	132	49	243	37	540	276	230	237	229	267	375	229	149	128	226	229	191	227	100	197	129	206	156	124	212	21	116	257
ENSG00000060709_RIMBP2	0	0	1	0	0	5	0	2	0	0	0	0	0	0	0	0	0	0	0	0	0	0	0	0	0	0	0	2	0	0	0	4	0	0	0	0	0	0	0	0	0	0	0	0	0	0	1	0	0
ENSG00000060718_COL11A1	0	1	7	0	0	2	3	0	3	0	0	0	0	0	0	0	0	0	0	0	0	0	0	0	0	0	0	0	0	0	0	0	0	0	0	0	0	0	0	0	0	0	0	0	0	0	0	0	0
ENSG00000060749_QSER1	199	51	173	134	168	63	135	58	378	237	237	229	198	243	215	251	308	310	75	42	232	314	88	305	98	438	514	364	411	371	350	519	441	304	315	339	251	331	281	44	260	186	443	188	235	298	146	282	357
ENSG00000060762_MPC1	166	91	236	144	218	105	106	45	188	103	314	109	112	122	131	109	74	91	121	75	200	98	272	163	17	158	114	142	152	55	84	193	201	170	166	124	170	132	117	68	149	156	123	190	163	89	36	112	87
ENSG00000060971_ACAA1	67	55	50	109	99	24	7	52	171	15	130	32	41	52	96	191	99	32	70	30	25	43	62	152	21	752	736	335	125	237	300	469	173	13	19	74	100	21	57	6	69	11	82	55	72	59	19	64	23
ENSG00000060982_BCAT1	59	22	100	0	37	141	108	24	130	92	42	53	55	55	0	87	70	68	87	67	81	80	45	55	10	37	128	62	107	75	71	41	52	161	90	68	57	105	63	20	27	105	123	72	75	61	74	154	34
ENSG00000061273_HDAC7	119	16	154	34	108	21	18	76	246	70	267	97	65	41	125	123	38	29	93	74	89	49	51	227	42	730	976	289	128	301	263	515	163	49	35	87	98	64	80	23	69	53	202	59	89	52	48	61	64
ENSG00000061337_LZTS1	0	0	0	0	0	3	0	2	0	0	0	0	0	0	0	0	0	0	0	0	0	0	0	0	0	0	3	0	0	0	1	1	0	0	0	0	0	0	0	0	0	0	0	0	0	0	2	0	0
ENSG00000061455_PRDM6	0	0	0	0	0	1	0	2	0	0	0	0	0	2	0	0	0	0	0	0	0	4	0	0	0	1	0	0	0	1	0	1	0	7	2	10	0	0	0	14	12	14	0	0	4	0	0	1	0
ENSG00000061492_WNT8A	0	0	0	0	0	2	0	0	0	0	0	0	0	0	0	0	0	0	0	0	0	0	0	0	0	0	0	0	0	0	0	0	0	0	0	0	0	0	0	0	0	0	0	0	0	0	0	0	0
ENSG00000061656_SPAG4	0	0	0	1	0	1	0	2	0	0	0	0	0	1	0	0	0	0	0	0	0	0	0	0	0	15	2	4	0	0	0	0	2	0	0	0	0	0	0	0	0	0	0	0	0	1	0	0	0
ENSG00000061676_NCKAP1	9228	5577	3422	2467	10074	2925	5504	6121	9743	10871	16061	10785	6881	11048	7606	6874	15151	7587	2640	2741	8762	8230	1985	9995	4747	5396	7030	11927	11422	7847	7964	8235	8819	7105	10712	12915	12402	8808	10566	2680	11756	4717	11311	8295	11438	10491	3982	9508	12803
ENSG00000061794_MRPS35	189	98	238	85	189	62	64	118	315	296	222	317	118	192	248	172	131	236	235	227	197	150	234	272	71	318	274	153	210	196	237	445	179	385	397	290	270	366	268	121	276	231	357	165	300	319	423	422	217
ENSG00000061918_GUCY1B3	27198	12246	14848	10219	18074	10888	15554	13441	27144	19951	21549	19218	17270	24808	17535	16656	28362	18970	10725	12567	21814	19573	8564	17333	8024	12479	8915	23547	22870	19837	17342	15032	24505	22511	25463	20880	29851	25065	21039	10192	22929	12562	19751	19859	24346	22115	8588	21255	19722
ENSG00000061936_SFSWAP	98	12	39	91	132	41	23	13	243	27	323	83	30	44	94	319	69	32	53	45	99	49	27	271	0	1372	858	198	159	326	392	768	161	79	72	77	79	103	48	9	81	62	129	46	39	99	28	69	44
ENSG00000061938_TNK2	635	270	254	214	731	272	268	280	866	494	1394	642	357	368	872	692	725	377	251	270	576	653	259	553	191	889	1120	873	926	710	560	674	694	388	548	727	315	468	773	197	353	429	412	644	530	568	219	461	246
ENSG00000061987_MON2	425	317	267	418	359	203	295	261	857	442	600	373	365	407	430	511	372	329	345	144	360	301	291	878	68	3028	2409	825	637	906	1013	2327	741	425	622	487	457	650	481	187	473	235	516	334	493	516	464	353	310
ENSG00000062038_CDH3	0	2	3	1	0	8	5	1	3	0	0	0	0	0	0	0	0	0	0	0	0	1	0	3	0	0	0	0	0	0	35	8	0	0	0	0	0	0	0	0	0	0	0	7	0	7	33	0	1
ENSG00000062096_ARSF	0	0	0	0	0	1	0	0	0	0	0	0	0	0	0	0	0	0	0	0	0	0	0	0	0	0	0	0	0	0	0	0	0	0	0	0	6	0	0	0	0	0	0	0	0	0	0	0	0
ENSG00000062194_GPBP1	1284	683	788	535	1178	441	520	857	1738	1489	1643	990	866	1434	1161	1067	1493	1590	685	820	1188	1452	641	1842	624	1979	1943	1550	1396	1292	1618	2039	1477	1765	2164	1585	1702	2137	1334	534	1395	862	1746	1159	1547	1964	1185	1774	1495
ENSG00000062282_DGAT2	1	21	0	194	0	2	0	0	8	30	0	0	0	0	0	47	2	0	0	0	3	0	0	65	0	190	1026	287	24	77	85	6	65	0	0	0	1	1	2	0	3	9	2	0	11	4	2	2	0
ENSG00000062370_ZNF112	1	1	4	0	0	89	0	1	12	0	3	0	1	0	3	0	0	2	0	27	1	6	0	10	55	6	25	6	11	13	3	8	3	10	1	0	15	9	2	0	7	0	5	1	0	34	1	6	40
ENSG00000062485_CS	452	180	242	110	265	118	201	89	480	218	511	166	428	236	389	362	629	333	21	188	336	396	60	632	224	1550	1212	430	455	598	568	1085	484	209	330	331	378	362	366	266	326	314	238	398	312	394	96	379	300
ENSG00000062524_LTK	0	0	0	0	3	0	0	14	12	8	6	3	6	3	1	17	0	0	8	0	10	2	3	2	0	42	71	18	5	5	8	27	12	2	0	1	0	0	1	7	1	0	6	2	1	9	13	11	4
ENSG00000062582_MRPS24	14	25	4	0	0	18	0	0	19	0	11	0	0	0	1	22	7	0	0	2	7	7	0	22	0	98	48	15	13	24	24	63	9	0	0	0	0	12	0	0	0	0	0	0	1	0	21	2	1
ENSG00000062598_ELMO2	1462	501	380	351	827	189	382	570	1345	462	1390	777	637	832	1052	819	952	927	551	498	916	930	426	1251	269	1881	1068	1162	1025	927	1319	1736	773	621	1155	1278	1359	967	814	437	1321	453	829	799	1086	955	390	961	760
ENSG00000062650_WAPAL	867	820	313	324	862	412	490	479	1537	738	1196	768	605	759	957	908	758	927	583	299	812	844	200	1401	397	2541	2529	1536	997	1213	1480	2215	1079	1017	1173	1260	1144	1486	917	332	896	664	1123	974	1081	1224	612	1046	950
ENSG00000062716_VMP1	275	132	639	627	389	480	214	134	489	299	418	381	267	300	375	989	346	425	149	193	421	371	92	1098	225	1738	5903	1900	476	847	793	766	620	478	699	538	484	634	410	210	359	294	477	435	613	593	326	421	319
ENSG00000062725_APPBP2	259	111	110	54	313	130	123	153	220	128	375	213	192	123	182	147	257	202	67	84	189	180	123	269	117	486	360	274	244	229	284	414	244	250	284	249	308	313	230	139	274	126	223	167	202	253	48	238	256
ENSG00000062822_POLD1	26	22	5	15	30	15	27	0	40	12	38	42	21	26	29	13	21	20	19	4	22	26	27	62	3	186	88	39	51	48	55	90	37	12	39	17	31	50	21	16	12	13	19	23	46	27	39	29	35
ENSG00000063015_SEZ6	0	0	0	0	0	2	0	2	4	0	0	0	0	0	0	0	0	0	0	0	0	2	0	0	0	3	11	4	3	2	0	4	3	0	0	4	0	0	0	0	1	0	0	2	0	0	0	3	1
ENSG00000063046_EIF4B	1245	853	1291	1087	976	918	599	690	1934	1141	2319	530	828	803	1265	1137	1136	752	817	696	1166	1179	725	2008	1082	6552	3661	1361	1521	2375	2659	4556	1573	826	996	822	1022	1224	1200	543	863	1085	1287	982	1258	975	491	956	840
ENSG00000063127_SLC6A16	0	0	41	0	19	3	0	0	5	0	12	7	0	0	0	0	0	3	0	0	3	0	0	11	0	48	23	15	3	4	49	24	9	2	4	0	6	7	0	0	4	0	9	1	6	0	2	2	0
ENSG00000063169_GLTSCR1	25	3	5	6	5	50	1	6	9	1	18	1	6	15	43	10	1	9	3	1	5	6	0	46	4	197	97	62	22	20	60	100	21	1	3	8	23	11	2	0	5	10	7	0	0	9	7	0	10
ENSG00000063176_SPHK2	26	42	5	23	26	25	0	7	36	1	28	10	12	7	10	29	7	16	13	1	14	20	8	21	0	98	37	32	29	31	18	48	24	12	9	9	33	10	21	2	5	21	51	16	28	15	8	14	17
ENSG00000063177_RPL18	328	562	918	502	401	347	302	131	1084	154	1081	103	68	122	317	381	191	232	438	155	199	214	163	979	397	4532	2024	554	528	984	1176	2650	474	112	134	214	320	420	174	91	204	240	413	178	316	288	94	147	186
ENSG00000063180_CA11	11	0	1	0	0	28	0	5	17	3	7	0	0	6	0	0	0	0	25	2	0	2	0	12	0	78	15	7	10	11	16	28	1	0	3	7	4	0	8	0	2	3	22	2	6	0	0	13	0
ENSG00000063241_ISOC2	9	0	7	0	0	11	0	1	0	0	3	0	0	0	0	0	0	0	0	0	0	0	6	10	0	30	12	6	1	7	9	16	8	0	4	0	0	0	0	0	1	0	0	0	0	0	4	0	0
ENSG00000063244_U2AF2	473	201	167	159	423	238	169	412	535	250	536	369	370	441	337	249	549	371	175	327	317	291	173	405	242	778	481	392	397	384	361	543	360	287	444	458	368	369	428	209	307	270	424	341	375	382	220	294	436
ENSG00000063245_EPN1	534	190	96	120	506	148	239	479	756	386	709	387	417	539	368	403	545	361	192	114	426	379	167	309	233	485	538	504	510	553	387	429	531	409	458	541	426	429	547	194	451	354	490	633	581	417	339	421	458
ENSG00000063322_MED29	4	16	1	47	37	20	0	6	38	10	43	28	24	21	13	26	47	12	37	8	58	30	9	65	25	174	94	48	36	38	62	97	19	21	31	61	21	26	29	23	14	0	36	26	32	22	46	28	19
ENSG00000063438_AHRR	0	0	0	0	0	2	1	3	5	0	4	0	0	0	0	0	0	0	0	0	0	0	0	3	0	3	2	0	0	0	0	1	0	0	0	0	0	0	1	0	3	0	0	0	0	4	0	0	0
ENSG00000063515_GSC2	0	0	0	0	0	0	0	0	0	0	0	0	0	0	0	0	0	0	0	0	0	0	0	0	0	0	0	0	0	0	0	0	0	0	0	0	0	0	0	0	0	0	0	0	0	0	0	0	0
ENSG00000063587_ZNF275	22	23	0	0	66	17	28	25	58	0	49	11	15	10	31	60	40	4	0	13	21	59	0	18	10	54	45	21	31	25	36	38	43	18	7	38	25	8	15	13	11	11	82	5	19	6	3	18	10
ENSG00000063601_MTMR1	39	22	5	1	49	4	51	12	92	3	94	16	3	59	59	55	36	17	77	47	48	13	0	153	6	593	481	95	64	171	127	334	74	29	71	13	36	74	23	5	20	20	46	8	39	10	13	30	25
ENSG00000063660_GPC1	0	0	0	1	0	27	0	2	1	0	0	0	0	1	1	1	0	0	0	0	0	2	0	2	0	3	0	1	2	0	10	2	0	0	0	0	0	0	0	0	0	0	0	0	0	1	0	0	0
ENSG00000063761_ADCK1	8	11	0	3	13	3	0	14	11	0	7	8	14	10	20	18	10	10	0	0	2	0	0	4	0	66	38	0	5	9	21	27	7	0	0	4	1	7	7	0	17	0	6	4	5	10	0	3	5
ENSG00000063854_HAGH	290	43	78	23	221	97	74	92	269	98	312	133	66	150	106	1075	178	232	111	127	62	125	120	229	575	661	1659	511	678	558	343	467	161	142	160	314	116	155	106	57	74	204	181	94	192	76	122	63	68
ENSG00000063978_RNF4	131	61	23	80	97	27	18	238	216	71	286	76	88	95	137	51	115	46	49	82	111	102	102	285	50	597	354	190	116	183	310	449	120	60	129	111	180	189	120	32	104	56	154	114	155	127	124	122	122
ENSG00000064012_CASP8	82	418	723	363	192	16	105	30	743	45	667	41	91	54	407	435	65	31	444	58	115	74	0	1093	25	4561	4587	1564	454	810	1367	2464	609	39	50	131	77	394	50	67	226	0	307	44	193	256	20	38	81
ENSG00000064042_LIMCH1	0	10	0	1	0	14	0	2	1	14	0	16	3	0	0	0	0	7	24	0	0	0	0	11	32	0	27	7	13	1	8	2	0	8	1	0	0	1	6	0	1	0	0	0	2	0	13	4	4
ENSG00000064102_ASUN	139	206	366	68	188	244	58	54	351	179	305	137	141	117	123	49	203	146	50	109	125	162	26	250	46	563	462	200	226	264	241	468	147	178	131	166	122	244	143	25	155	147	215	152	317	240	107	228	225
ENSG00000064115_TM7SF3	1190	743	660	579	1644	597	951	455	1785	1234	1917	1088	902	1507	941	861	1757	1014	468	708	1281	1535	698	1277	493	1477	1065	1139	1501	1332	1176	1589	1522	1521	1953	1403	1914	1481	1424	730	1375	1049	1275	1261	1937	1686	889	1333	1323
ENSG00000064195_DLX3	0	0	0	0	0	2	0	2	0	0	0	0	0	0	0	0	0	0	0	0	0	0	0	0	0	0	0	0	0	0	0	0	0	0	0	0	0	0	0	0	0	0	0	0	0	0	3	0	0
ENSG00000064199_SPA17	23	13	0	14	28	19	0	5	6	13	18	14	39	13	8	5	7	24	0	2	24	10	0	19	10	3	8	3	16	8	0	6	30	7	14	3	11	22	27	2	10	0	7	26	19	27	12	3	4
ENSG00000064201_TSPAN32	177	261	80	121	201	93	394	276	215	87	606	273	179	362	195	188	351	122	154	188	226	334	246	275	142	641	285	191	404	228	369	490	266	120	214	218	254	184	340	128	264	151	196	204	214	221	80	227	147
ENSG00000064205_WISP2	0	0	0	0	0	1	0	0	0	0	0	0	0	0	0	0	0	0	0	0	0	0	0	0	0	0	0	0	0	0	0	0	0	0	0	0	0	0	0	0	0	0	0	0	0	0	0	0	0
ENSG00000064218_DMRT3	0	0	0	0	0	0	0	0	0	0	0	0	0	0	0	0	0	0	0	0	0	0	0	0	0	0	0	0	0	0	0	0	0	0	0	0	0	0	0	0	0	0	0	0	0	0	0	0	0
ENSG00000064225_ST3GAL6	1840	995	615	512	1189	619	473	360	1473	1155	1840	987	1321	1551	1064	956	1416	1674	1035	1121	1243	1091	506	1388	447	692	820	702	1389	1379	1397	1192	2125	1860	1893	1583	2112	1600	1131	482	1581	732	619	689	955	1924	736	968	988
ENSG00000064270_ATP2C2	0	0	1	0	16	18	0	2	0	0	0	0	0	0	0	0	0	0	0	0	0	0	0	4	0	3	23	4	5	4	0	1	0	0	0	0	0	0	4	0	0	0	0	3	0	0	0	0	0
ENSG00000064300_NGFR	0	0	0	0	0	6	0	0	1	0	0	0	0	0	0	0	0	0	0	0	0	0	0	0	0	5	1	0	0	2	0	1	1	0	0	0	0	0	0	0	0	0	0	0	0	0	0	0	0
ENSG00000064309_CDON	29	1	2	0	0	23	1	1	2	17	49	0	0	5	21	33	0	0	0	0	9	3	0	12	0	0	3	0	1	8	11	0	0	0	2	21	0	0	0	0	0	0	0	0	0	0	0	0	0
ENSG00000064313_TAF2	1009	477	674	310	1421	191	545	567	1842	1820	1011	904	974	1175	1036	907	1279	1321	302	808	1182	1464	579	1515	207	2028	1566	1610	1488	1319	1619	2067	1401	1994	1819	1760	1361	2427	1305	462	1228	984	1605	1164	1740	1476	1018	1765	1675
ENSG00000064393_HIPK2	8869	2418	2849	982	6886	2342	3243	4261	12687	8245	9448	7921	4890	5802	7979	7188	8935	6220	2996	3502	6374	7403	3150	5605	3108	6171	4556	8915	8921	6929	5759	6780	9115	6608	9360	8490	7109	8469	7639	2773	5927	8636	11270	7349	6679	6316	6739	8050	7827
ENSG00000064419_TNPO3	780	691	571	360	988	135	153	458	1480	1186	1220	497	596	641	1003	748	797	821	314	316	856	676	474	1140	237	1696	1730	1036	736	863	1131	1478	874	1017	1314	1010	744	1158	877	494	759	1075	1324	886	1079	1418	786	1008	853
ENSG00000064489_MEF2BNB-MEF2B	41	21	10	0	21	0	0	8	43	26	53	2	18	37	0	32	33	19	37	0	8	7	0	41	6	153	98	64	9	40	32	80	13	6	0	21	27	4	22	6	0	26	18	25	15	12	23	22	5
ENSG00000064490_RFXANK	86	82	86	205	126	35	57	228	159	49	54	15	29	95	74	103	80	32	0	15	76	56	40	163	0	480	339	129	99	235	202	254	118	39	61	168	100	79	66	0	69	118	102	24	113	25	24	65	59
ENSG00000064545_TMEM161A	0	25	0	0	12	8	0	0	7	4	13	0	0	0	16	23	0	0	0	0	1	3	0	20	0	82	42	6	7	30	45	36	6	0	0	8	0	5	0	0	2	8	0	0	8	0	0	5	0
ENSG00000064547_LPAR2	0	0	23	6	2	7	1	0	22	0	2	3	0	0	9	44	9	1	2	8	0	0	0	19	0	83	319	90	13	13	30	54	27	0	7	15	8	12	0	5	3	0	3	2	4	11	1	3	0
ENSG00000064601_CTSA	155497	93364	62882	46446	185850	84396	77087	97711	198297	117262	217204	95229	85287	103916	140968	115925	138797	106255	69197	80240	136312	128201	76848	119361	55884	53752	76641	112050	121114	107249	117714	90676	129046	118124	153778	142791	117400	99246	171828	55491	109926	87457	150821	140701	149817	128061	72540	141144	143511
ENSG00000064607_SUGP2	245	332	249	86	194	150	80	98	676	96	510	163	95	238	209	368	386	141	103	94	242	273	92	569	167	2404	1164	467	415	524	606	1253	445	198	170	220	191	273	196	102	189	194	309	160	293	288	114	248	284
ENSG00000064651_SLC12A2	469	383	273	389	553	531	327	463	1010	905	483	677	530	630	708	515	543	580	189	222	654	562	491	951	135	844	897	654	722	632	550	1072	664	858	1254	838	780	1167	873	147	509	712	722	630	820	1305	549	1040	682
ENSG00000064652_SNX24	317	311	314	662	834	347	144	182	770	637	1327	359	315	404	438	470	1030	418	315	727	521	745	534	989	105	500	338	521	762	147	239	440	672	752	814	651	832	573	842	456	893	695	569	427	396	592	161	625	447
ENSG00000064655_EYA2	0	0	2	0	0	1	2	1	1	0	0	0	0	0	0	0	0	0	0	0	0	0	0	0	0	0	0	0	0	1	0	0	0	0	0	0	0	0	0	0	0	0	0	0	0	0	0	0	0
ENSG00000064666_CNN2	2030	919	943	853	1453	292	1383	1083	1896	787	1003	786	1565	1924	362	1451	1166	1648	663	789	1280	1315	243	804	607	1888	3110	1738	1093	1353	1025	1040	1814	877	675	698	1470	474	1553	400	1019	684	1144	1270	1202	984	373	1445	1006
ENSG00000064687_ABCA7	135	94	216	192	104	5	32	15	302	71	278	31	55	43	136	270	62	82	123	9	44	40	67	283	39	1376	2254	840	199	345	251	538	239	30	28	88	49	39	30	66	54	52	126	53	60	62	68	30	65
ENSG00000064692_SNCAIP	0	4	1	0	0	2	1	2	0	0	0	0	0	0	0	0	0	0	0	0	0	0	0	9	0	0	0	0	0	0	0	0	0	11	11	0	6	0	0	0	0	0	0	0	0	0	0	0	0
ENSG00000064703_DDX20	100	16	0	36	78	6	0	20	132	46	210	49	20	46	44	98	91	96	1	6	66	89	27	141	62	361	205	126	101	164	183	310	113	63	79	70	110	62	68	0	83	48	146	74	71	75	4	85	85
ENSG00000064726_BTBD1	1299	455	337	525	1178	558	833	575	1284	813	1841	656	1058	1372	1089	1183	1640	814	392	400	1333	1084	520	966	444	1022	1014	1127	1123	966	1039	1389	1324	1152	1377	1102	1304	1064	1361	651	1137	896	1217	1216	1335	1199	331	1300	1663
ENSG00000064763_FAR2	205	85	54	113	197	19	119	91	418	244	332	175	87	247	209	238	280	192	118	83	266	243	130	205	67	169	366	232	247	214	205	203	141	305	439	217	321	265	286	75	188	148	236	230	282	253	103	347	275
ENSG00000064787_BCAS1	51	15	1	16	0	6	0	2	0	0	0	0	0	0	0	0	0	0	0	0	0	0	0	0	0	0	1	5	0	0	0	3	0	0	0	0	0	3	0	0	0	0	1	0	0	0	1	0	9
ENSG00000064835_POU1F1	0	0	0	0	0	0	0	0	0	0	0	0	0	0	0	0	0	0	0	0	0	0	0	0	0	0	0	0	0	0	0	0	0	0	0	0	0	0	2	0	2	0	0	0	0	0	0	0	0
ENSG00000064886_CHI3L2	3	0	0	1	4	0	0	0	12	0	8	0	0	0	3	2	0	0	0	0	1	3	0	14	0	85	29	5	3	19	60	53	1	0	0	7	0	10	5	0	4	0	24	0	0	0	15	0	0
ENSG00000064932_SBNO2	197	55	222	136	122	21	98	92	330	151	255	114	121	78	109	269	192	105	88	25	103	76	44	268	82	1019	2332	984	247	409	359	337	314	36	112	163	160	96	72	58	134	45	196	66	182	145	110	112	63
ENSG00000064933_PMS1	530	312	599	382	702	657	367	292	1160	1207	454	496	501	754	714	406	570	880	269	404	931	718	650	685	265	1258	959	726	770	719	923	1208	740	1403	1216	908	771	1313	749	177	656	717	828	758	894	913	793	1065	756
ENSG00000064961_HMG20B	1916	907	1027	522	2654	1321	1061	2246	3412	2630	3642	1815	1352	1819	2492	1889	2691	1742	1501	1807	2062	2579	1137	1955	1368	1407	1194	1932	2477	1483	1687	1877	2151	2159	2749	2524	1403	2109	2755	796	2150	1689	2500	2017	2504	2221	1243	1998	1813
ENSG00000064989_CALCRL	0	24	0	0	0	0	7	0	1	0	16	0	0	6	1	28	2	11	0	0	17	4	0	24	0	2	36	4	3	5	1	13	4	8	3	17	7	1	0	0	12	5	7	11	9	8	0	5	12
ENSG00000064995_TAF11	175	97	0	128	120	9	99	33	159	43	139	90	65	79	38	91	108	89	26	74	61	91	9	158	35	258	232	81	129	149	120	226	105	78	79	51	169	57	113	59	85	68	91	42	73	90	33	98	133
ENSG00000064999_ANKS1A	976	272	482	95	579	144	275	679	796	365	1236	540	216	395	645	398	659	488	150	309	361	507	134	585	459	651	745	682	702	629	521	673	815	437	549	485	623	439	580	188	601	270	506	498	474	554	388	545	387
ENSG00000065000_AP3D1	577	181	328	31	319	136	201	488	814	279	795	298	218	453	477	588	925	397	209	181	404	492	206	578	272	1506	1086	510	579	647	644	949	585	341	323	453	487	376	620	150	360	559	628	302	396	400	339	484	385
ENSG00000065029_ZNF76	79	83	141	89	110	12	49	41	314	204	217	41	90	121	165	140	113	115	14	125	88	57	83	153	47	676	304	119	177	205	234	421	147	82	68	73	155	117	128	40	105	112	113	92	96	48	136	98	83
ENSG00000065054_SLC9A3R2	10	6	30	11	19	11	0	17	64	44	89	18	0	42	29	0	9	5	38	61	10	11	11	116	125	20	24	6	7	8	38	24	3	6	46	38	25	19	17	17	10	7	38	11	40	10	59	13	18
ENSG00000065057_NTHL1	0	8	0	1	15	4	0	0	7	0	30	0	0	0	0	6	0	0	0	9	2	0	0	8	0	57	28	3	6	9	16	36	2	0	0	2	0	2	2	3	1	0	2	1	13	6	0	2	0
ENSG00000065060_UHRF1BP1	1141	506	672	159	1580	414	551	1266	2074	1012	2354	1757	555	519	938	1133	1024	714	138	429	787	705	783	920	590	722	1007	988	1233	993	797	905	836	1106	638	981	284	1013	842	331	616	1613	1718	578	706	971	977	872	631
ENSG00000065135_GNAI3	562	416	182	458	378	171	346	222	586	235	761	344	313	429	384	326	598	367	277	356	319	499	245	727	353	856	1038	552	491	436	561	735	517	566	528	309	799	457	461	315	492	228	334	392	582	564	184	373	472
ENSG00000065150_IPO5	206	306	347	162	261	155	15	162	558	154	446	255	103	162	261	164	191	283	112	80	251	183	115	336	337	1235	702	257	316	406	560	1072	320	103	225	211	252	305	314	60	190	158	238	251	195	168	134	247	153
ENSG00000065154_OAT	0	63	144	82	58	11	78	1	216	47	133	34	19	36	99	142	29	103	120	43	56	59	43	286	70	612	815	208	168	177	194	343	128	49	98	121	14	95	61	32	27	76	68	49	101	89	50	54	50
ENSG00000065183_WDR3	48	35	274	87	64	77	35	27	186	77	189	34	62	55	70	36	71	27	10	39	61	34	82	79	50	481	260	125	112	152	131	479	91	44	84	20	28	82	35	18	31	0	42	61	76	86	0	106	23
ENSG00000065243_PKN2	795	436	550	450	729	395	665	438	1521	1149	960	1069	806	1039	1224	810	863	1442	533	567	934	1258	426	1435	519	1670	3363	1536	1201	1253	1350	1628	1303	1839	2039	1640	1181	2057	1478	398	1104	690	1287	891	1446	1347	820	1539	1039
ENSG00000065268_WDR18	0	3	12	2	5	13	0	0	8	0	0	0	0	0	3	5	0	2	0	0	1	0	9	10	0	55	30	4	6	26	8	72	3	0	1	0	1	4	0	0	0	0	3	0	0	0	1	0	0
ENSG00000065308_TRAM2	41	0	22	45	44	6	31	1	28	29	42	28	26	36	40	48	32	27	1	24	23	36	41	40	16	192	86	28	45	66	64	123	66	24	41	33	30	39	35	0	59	31	22	29	11	40	37	39	26
ENSG00000065320_NTN1	5	1	0	0	0	6	0	1	5	0	0	0	0	0	0	1	5	0	0	0	0	0	0	6	0	4	0	0	0	0	0	2	1	0	0	4	1	2	0	0	0	0	0	0	0	0	0	0	0
ENSG00000065325_GLP2R	0	0	0	0	0	0	0	0	0	0	0	0	0	0	0	0	0	0	0	0	1	0	0	0	0	0	0	0	0	0	0	0	0	0	0	0	0	0	0	0	0	0	0	0	0	0	0	0	0
ENSG00000065328_MCM10	47	25	0	1	16	122	46	55	69	63	93	60	70	43	57	17	114	98	21	220	74	78	78	67	4	38	91	44	71	45	76	71	74	68	141	86	53	90	59	127	55	120	88	62	69	92	156	76	61
ENSG00000065357_DGKA	265	356	263	141	283	171	237	67	544	354	831	216	147	180	428	327	321	241	116	89	205	320	221	386	181	1253	962	510	576	515	740	854	329	265	442	255	207	348	455	130	249	365	325	339	179	457	258	201	163
ENSG00000065361_ERBB3	8	11	0	2	0	17	1	19	4	0	15	0	0	0	0	0	0	0	0	0	0	0	0	3	0	0	2	0	0	0	6	5	1	0	0	0	0	0	0	0	0	0	0	15	0	0	46	1	8
ENSG00000065371_ROPN1	0	0	0	0	0	0	0	1	0	0	0	0	0	0	0	0	0	0	0	0	0	0	0	0	0	0	0	0	0	2	0	0	0	0	0	0	0	0	0	0	0	0	0	0	0	0	0	0	0
ENSG00000065413_ANKRD44	74	262	350	316	213	9	12	13	944	41	715	34	24	30	205	590	7	31	38	61	120	4	89	913	0	4951	5186	1185	519	1173	1728	3467	592	4	16	98	65	369	22	34	128	54	320	17	159	226	43	39	20
ENSG00000065427_KARS	434	474	304	207	554	276	187	348	954	179	896	295	454	394	543	968	491	630	435	213	591	502	201	743	424	2423	1579	700	863	863	1157	1779	1030	364	220	557	661	395	505	316	563	188	565	354	603	527	450	532	328
ENSG00000065457_ADAT1	125	205	4	78	56	63	48	48	130	34	179	45	68	89	191	157	283	73	36	4	64	75	82	104	100	434	259	104	311	143	251	229	216	142	90	65	84	50	68	100	304	15	89	243	319	48	142	67	43
ENSG00000065485_PDIA5	348	219	107	162	297	538	331	258	134	92	470	261	267	171	293	96	374	466	35	260	88	248	133	641	92	310	211	257	284	348	417	88	333	592	892	793	640	198	298	174	345	287	206	352	134	603	387	237	373
ENSG00000065491_TBC1D22B	65	32	12	70	56	156	82	56	76	28	32	37	40	30	20	188	76	56	11	39	17	23	0	66	30	235	318	107	159	90	135	129	28	14	15	7	26	25	2	2	16	16	59	9	8	17	26	17	20
ENSG00000065518_NDUFB4	2606	4206	2936	4479	1824	2623	4113	504	1941	902	3388	1466	1451	1788	1101	699	1494	1526	3272	2576	1356	1323	2756	1968	1534	1360	936	1513	1422	812	1344	1721	1606	2120	1331	1446	1755	593	1582	3124	1605	1653	1337	1121	2130	1521	469	1179	1514
ENSG00000065526_SPEN	1300	526	527	434	986	235	260	597	1888	723	1827	698	791	737	944	897	1058	836	397	343	647	771	330	1216	438	3542	3909	1972	1255	1757	1461	2655	1315	700	989	1138	1129	936	757	334	995	541	898	725	745	1034	658	726	811
ENSG00000065534_MYLK	30817	19642	14264	11803	32373	10507	19272	18617	36735	27436	44312	28291	17044	24670	25713	21209	30768	22451	14397	22730	20556	30037	19744	19745	14510	14063	19822	33427	32412	25387	22886	22688	26778	29664	40333	39718	30062	28702	29790	19068	26752	31939	31199	26461	29561	32558	18844	22835	26269
ENSG00000065548_ZC3H15	299	125	126	83	108	24	80	114	192	34	253	75	92	126	119	53	134	186	30	49	76	111	30	235	143	556	414	188	166	220	297	393	209	131	115	130	258	72	137	51	133	130	124	130	152	163	58	77	168
ENSG00000065559_MAP2K4	763	504	623	425	654	971	719	611	1372	1246	1083	897	596	839	1079	655	900	1128	649	481	1070	1077	775	1108	414	923	940	1076	1035	939	831	873	1244	1632	1885	1247	1173	1914	1123	489	1044	1016	1076	936	1160	1568	1122	1360	1008
ENSG00000065600_TMEM206	237	71	98	15	101	12	79	125	222	151	216	126	114	175	105	128	333	89	117	136	184	224	86	298	91	192	159	204	244	149	113	330	140	118	438	222	202	111	157	62	261	102	136	106	149	269	127	156	144
ENSG00000065609_SNAP91	0	1	0	0	0	0	0	0	0	0	0	0	0	0	0	0	0	0	0	0	0	0	0	0	0	0	0	0	0	0	0	0	0	0	0	0	0	0	0	0	0	0	0	0	0	0	1	0	0
ENSG00000065613_SLK	989	638	410	426	798	414	290	477	1385	759	1306	739	499	773	871	712	884	693	381	457	658	717	226	1065	481	1822	2254	1188	1012	1225	1168	1859	1072	946	1098	1050	965	1138	663	384	925	569	861	745	1040	989	369	711	520
ENSG00000065615_CYB5R4	1358	1123	1058	551	671	821	910	508	1296	589	1974	1021	900	1177	527	823	1296	978	660	502	1239	1037	643	1170	551	1050	1863	1493	1291	1058	1053	1382	1266	1201	1004	1238	1159	935	1098	769	1078	647	1071	906	1325	1228	242	928	844
ENSG00000065618_COL17A1	19	20	25	109	0	3	96	2	34	0	0	0	0	0	0	1	0	6	0	0	0	6	0	25	0	16	79	4	1	8	8	4	0	0	0	0	0	0	0	0	0	0	0	10	0	0	25	3	3
ENSG00000065621_GSTO2	0	0	12	0	0	2	0	1	0	3	0	0	0	0	1	0	0	0	0	0	4	2	0	2	0	13	6	7	0	7	0	3	0	0	2	4	0	0	0	0	0	0	1	0	0	0	0	0	0
ENSG00000065665_SEC61A2	106	41	100	34	29	3	1	5	32	65	79	15	31	43	47	28	22	53	23	0	22	30	32	54	0	160	237	67	52	55	28	94	42	40	53	15	40	56	35	34	36	34	18	46	10	18	5	30	68
ENSG00000065675_PRKCQ	3748	1449	2144	1439	2662	1192	1770	2634	3935	2741	4229	2665	1790	3420	2493	1860	3562	2755	1390	1885	2330	2585	1852	2679	1290	3653	1926	3596	2965	2894	3138	3857	3489	3165	3484	3956	6061	2991	2983	2051	3078	2623	2493	1910	3971	3371	1866	2513	3138
ENSG00000065717_TLE2	0	0	0	0	3	2	62	0	5	0	10	0	0	0	3	0	0	0	8	0	5	2	0	12	12	14	11	0	4	3	5	20	9	0	0	1	0	4	0	0	0	0	4	0	0	1	0	0	0
ENSG00000065802_ASB1	17	3	0	0	14	9	8	0	10	5	15	0	0	0	5	14	0	0	7	0	12	6	5	24	0	147	48	8	16	31	33	84	14	0	0	5	0	13	0	0	0	9	11	3	2	4	0	0	0
ENSG00000065809_FAM107B	714	93	396	328	439	65	324	248	611	363	370	366	293	509	229	483	706	440	170	149	301	383	124	440	57	1368	806	784	731	379	834	779	549	720	545	841	748	549	446	149	642	123	403	529	373	699	129	341	649
ENSG00000065833_ME1	297	226	2	2	464	338	296	58	509	378	529	448	608	141	381	981	375	95	386	308	437	227	280	294	283	21	200	140	388	26	451	336	752	445	129	138	77	33	224	167	90	86	296	358	313	95	18	369	88
ENSG00000065882_TBC1D1	956	363	566	411	874	394	634	1118	1372	1045	1210	669	996	1395	1148	1071	1250	1610	519	637	1521	1467	489	1276	392	1654	2102	1293	1598	1031	1035	1419	1867	1555	1607	1024	1562	1380	1838	322	1548	1080	1650	1367	1594	933	635	1281	1377
ENSG00000065883_CDK13	482	167	297	80	498	114	84	85	808	412	833	310	253	331	313	407	391	273	82	144	283	306	64	696	66	2083	1562	687	499	643	901	1502	581	347	439	469	313	554	375	89	404	169	450	293	315	519	220	359	296
ENSG00000065911_MTHFD2	1988	1123	1597	1216	1407	1905	1209	739	1564	1442	1722	1105	1321	1905	1191	1193	2504	2066	742	1414	1756	1448	1575	2439	979	1536	721	1502	1981	1388	1173	1303	1323	1877	2814	1696	1400	2006	1727	874	1788	1826	2102	1874	1847	2023	1347	1689	1768
ENSG00000065923_SLC9A7	126	408	267	56	251	308	216	197	376	254	266	294	193	349	262	198	454	323	257	240	210	159	407	268	153	174	443	313	330	279	303	240	407	514	433	509	416	595	521	308	301	573	325	356	429	545	546	337	318
ENSG00000065970_FOXJ2	444	290	172	83	517	197	267	359	695	254	1311	243	287	223	607	243	539	266	270	97	360	194	96	399	289	444	675	793	574	272	343	424	251	399	240	160	152	320	294	97	259	242	287	279	168	495	401	354	370
ENSG00000065978_YBX1	3659	2147	1754	1338	3728	3244	2729	1747	5341	3637	4873	3744	3499	3626	3138	6791	4832	4716	3099	2404	4537	3852	2636	2899	3541	3379	4811	3093	4493	4408	3376	3367	5012	3258	3069	3307	4068	3190	4787	2318	3161	3006	4162	3835	4359	3451	1506	4095	3562
ENSG00000065989_PDE4A	13	0	1	0	4	2	1	22	175	0	61	20	0	14	24	33	0	1	57	1	4	1	0	90	0	473	171	41	35	113	115	355	47	0	1	0	0	52	3	0	9	17	6	26	27	19	38	6	0
ENSG00000066027_PPP2R5A	2733	932	1103	548	2235	468	1046	1039	2719	1844	3206	1999	1449	1977	2130	1525	2175	1729	623	697	1703	1878	505	2217	902	1911	2492	2643	2415	2056	2244	2438	2073	2276	2842	1951	2279	1902	2002	573	2071	1035	2313	1951	2734	2366	1034	1761	1621
ENSG00000066032_CTNNA2	0	0	0	0	0	6	0	0	0	0	0	0	0	0	0	0	0	0	0	0	0	7	0	0	0	0	0	0	0	0	0	0	0	6	0	0	0	0	0	0	0	0	0	0	0	0	0	0	0
ENSG00000066044_ELAVL1	722	417	288	326	564	349	431	314	799	497	777	579	522	793	484	392	873	589	337	451	464	697	414	586	365	626	582	640	631	714	574	646	622	627	587	579	759	633	837	486	514	564	710	705	732	642	334	661	725
ENSG00000066056_TIE1	4	0	0	0	4	10	0	2	8	0	35	0	0	0	4	3	1	0	2	6	1	0	0	9	0	43	21	19	1	5	3	5	2	0	0	0	0	0	1	1	0	2	0	0	0	3	4	0	1
ENSG00000066084_DIP2B	244	137	258	298	146	287	38	57	433	184	424	87	71	149	255	411	199	212	94	96	154	208	132	421	108	1662	3158	915	318	594	799	878	417	197	100	298	178	174	194	110	176	301	245	86	239	331	149	163	210
ENSG00000066117_SMARCD1	48	14	30	7	21	14	7	17	67	50	53	14	23	51	81	35	53	37	25	17	19	32	2	99	0	452	274	100	54	113	215	286	74	24	20	37	57	74	22	29	45	3	27	25	40	56	33	13	49
ENSG00000066135_KDM4A	80	100	143	80	101	14	6	55	245	73	164	26	115	76	128	204	41	80	3	21	59	15	44	196	3	1132	625	271	197	277	374	635	156	46	19	80	70	137	57	11	89	1	158	34	69	88	28	33	28
ENSG00000066136_NFYC	721	526	218	142	535	203	440	252	1268	363	861	459	390	701	759	604	867	657	693	375	719	600	509	677	449	856	761	586	590	596	704	614	760	689	640	569	1062	552	938	500	642	447	844	644	687	691	353	687	1087
ENSG00000066185_ZMYND12	500	300	180	95	224	521	313	128	332	438	418	235	149	422	159	238	535	148	233	242	208	265	155	441	239	149	146	256	273	158	291	393	379	196	420	589	412	365	216	505	428	100	370	375	240	676	219	296	418
ENSG00000066230_SLC9A3	0	0	0	0	0	0	0	0	0	4	0	0	0	0	0	0	0	0	0	0	0	0	0	0	0	2	4	0	0	0	0	0	0	0	0	0	0	0	0	0	0	0	0	0	0	0	0	0	0
ENSG00000066248_NGEF	0	0	0	0	0	2	0	0	0	8	1	0	0	0	0	1	0	0	0	0	0	2	0	2	0	0	0	4	1	0	0	0	1	0	0	2	0	0	2	0	1	11	1	0	0	0	0	1	0
ENSG00000066279_ASPM	351	148	105	113	128	163	12	50	303	199	239	270	124	217	246	283	261	299	3	97	229	229	74	228	126	294	666	437	308	337	480	393	271	257	264	397	244	458	249	60	216	219	313	221	252	409	199	355	251
ENSG00000066294_CD84	3092	1445	1523	4842	1754	1413	2009	1246	1942	1060	2463	1826	2509	3245	1744	1740	2974	5235	1284	2357	1681	2530	2013	1285	2946	1423	890	1781	2821	1926	1462	1298	3660	3171	2325	2202	4634	1787	2443	1797	2140	1907	1823	1523	2312	2509	1732	2161	2493
ENSG00000066322_ELOVL1	294	94	270	192	205	47	150	25	321	106	544	132	121	165	232	151	161	75	92	273	174	171	117	375	98	804	553	375	208	214	350	593	161	158	144	115	181	191	171	131	153	30	180	161	144	138	73	184	162
ENSG00000066336_SPI1	11	95	512	162	0	16	21	0	33	44	20	0	0	1	41	268	10	6	51	29	18	8	0	220	1	464	2482	984	150	353	176	101	186	12	6	64	9	12	5	11	6	25	33	15	53	61	4	28	1
ENSG00000066379_ZNRD1	13	75	64	3	25	1	55	35	117	0	19	0	2	10	3	28	22	20	16	16	22	10	0	55	0	173	94	45	14	38	37	135	29	13	19	29	43	23	10	1	6	45	12	16	13	14	0	5	4
ENSG00000066382_MPPED2	20	0	125	71	39	64	0	12	63	67	149	51	88	141	185	156	217	90	14	114	104	73	32	176	66	47	151	37	58	27	60	95	58	106	189	65	86	94	90	26	151	86	124	68	62	101	169	93	53
ENSG00000066405_CLDN18	0	0	0	0	0	0	0	0	0	0	0	0	0	0	0	0	0	0	0	0	0	0	0	1	0	3	1	0	0	0	0	0	0	0	0	0	0	0	0	0	0	0	0	0	0	0	0	0	0
ENSG00000066422_ZBTB11	550	330	570	156	553	304	123	180	710	423	611	431	471	520	475	347	585	522	283	192	627	637	101	645	236	1141	1018	717	637	576	676	1102	597	837	936	653	564	1067	341	125	484	252	569	482	764	682	452	749	809
ENSG00000066427_ATXN3	151	242	142	104	212	176	222	42	372	114	348	120	45	160	192	170	87	184	36	180	184	125	173	213	103	488	354	230	226	228	267	369	295	330	360	320	247	458	195	64	125	114	139	137	270	273	215	244	311
ENSG00000066455_GOLGA5	444	231	146	184	369	173	168	133	425	163	754	193	213	281	269	234	294	289	87	149	266	346	61	466	142	674	619	405	367	380	422	551	411	285	367	318	313	318	329	173	262	228	249	368	353	357	94	249	248
ENSG00000066468_FGFR2	0	1	2	1	0	67	1	1	3	0	0	0	0	0	0	0	0	7	0	0	0	0	0	0	0	0	6	0	0	1	0	14	3	0	0	0	0	0	0	0	1	0	0	0	0	0	0	0	0
ENSG00000066557_LRRC40	95	157	10	49	105	51	45	27	191	143	114	81	48	77	105	136	154	75	7	31	95	105	17	173	9	398	198	96	134	162	105	294	131	176	161	140	96	207	115	86	103	92	135	138	92	235	164	118	79
ENSG00000066583_ISOC1	293	168	96	97	213	45	141	43	282	185	139	127	41	260	134	130	239	189	53	191	238	204	124	259	59	296	218	225	187	199	214	257	215	271	263	293	403	168	216	59	160	82	193	173	209	241	36	232	165
ENSG00000066629_EML1	0	0	0	0	0	1	1	0	0	0	0	1	1	0	0	0	0	0	0	0	0	0	0	8	0	0	0	0	1	0	0	2	0	3	3	0	0	0	0	0	0	0	1	0	0	0	0	0	0
ENSG00000066651_TRMT11	43	65	49	11	79	2	68	2	133	69	109	47	11	54	67	21	64	67	0	24	53	100	0	93	44	261	127	77	89	112	130	198	92	116	122	92	41	85	105	23	81	42	135	101	45	44	104	107	44
ENSG00000066654_THUMPD1	1004	376	284	372	499	184	381	265	589	394	1054	613	161	427	418	344	496	628	285	692	358	822	354	594	602	776	600	925	584	471	657	827	453	725	650	859	833	431	441	528	465	340	704	501	663	492	334	410	734
ENSG00000066697_MSANTD3	2289	1659	1008	1051	1576	843	1728	965	3466	1537	3305	1799	1867	2205	2162	1208	2438	2900	1473	1326	2035	2483	1086	1807	1100	1285	1314	2251	1906	1900	1912	1820	2850	2779	3083	2274	2767	2120	3237	1474	2118	1442	2436	2394	2463	2707	1466	2100	2931
ENSG00000066735_KIF26A	3	0	0	0	0	14	0	1	18	9	3	0	0	1	0	0	0	0	0	0	0	0	0	7	1	0	0	0	1	1	6	1	0	0	0	0	0	9	0	0	3	0	1	0	0	0	5	0	1
ENSG00000066739_ATG2B	560	101	150	53	194	59	269	125	693	316	1049	344	232	293	390	458	531	155	42	108	229	304	111	610	248	1945	1399	605	426	602	606	1201	419	179	350	336	454	353	243	122	308	88	337	286	334	447	219	306	366
ENSG00000066777_ARFGEF1	1931	957	574	920	1493	958	756	794	2619	2327	2713	1785	1455	1981	1781	1759	2524	1631	475	703	1665	2110	606	2350	853	3761	3574	2409	2281	2355	1983	3412	2191	2106	2650	2160	2061	2771	2050	468	1855	1144	2345	1680	1926	2461	1358	2252	1853
ENSG00000066813_ACSM2B	0	0	0	0	0	1	0	0	0	0	0	0	0	0	0	0	0	0	0	0	0	0	0	0	0	0	0	0	0	0	0	0	0	0	0	0	0	0	0	0	0	0	0	0	0	0	1	0	0
ENSG00000066827_ZFAT	107	24	47	38	75	79	94	39	182	51	167	68	74	149	127	120	220	135	41	28	81	103	46	136	10	344	437	190	135	114	131	143	106	76	42	147	50	82	49	25	81	137	134	118	115	138	60	85	62
ENSG00000066855_MTFR1	113	50	157	62	150	254	184	170	204	142	212	219	118	180	182	150	159	112	108	23	162	99	202	134	99	163	155	126	138	124	155	153	180	253	265	220	261	139	176	71	171	103	157	73	120	227	128	136	131
ENSG00000066923_STAG3	0	0	64	1	0	0	0	2	0	0	5	0	0	21	5	0	0	0	3	2	0	1	0	13	0	25	44	8	0	19	4	18	5	0	0	0	0	12	0	0	0	0	14	1	17	5	1	0	0
ENSG00000066926_FECH	525	568	472	363	801	303	204	223	1117	441	1374	509	155	225	336	3283	493	505	555	107	350	258	75	789	1637	2650	8144	1745	2154	1375	701	1369	319	248	241	635	186	286	323	426	182	277	937	378	299	327	96	431	312
ENSG00000066933_MYO9A	274	110	328	16	181	14	135	96	593	210	352	235	218	291	296	271	295	251	70	147	297	234	57	568	168	1459	812	345	411	500	677	1259	447	380	503	414	327	656	222	50	277	152	297	239	323	509	243	332	266
ENSG00000067048_DDX3Y	3961	1997	782	1780	1859	1004	8	2025	3232	2001	3588	1960	0	2666	2787	1979	2616	3619	1359	1518	2299	2419	0	3225	1616	4	4	3611	3	3087	3465	4158	4025	2750	3026	2524	4429	2025	2208	1339	2873	1	2658	2102	2726	2704	1359	2366	3260
ENSG00000067057_PFKP	2391	1152	927	607	1215	833	1516	2266	2190	373	2437	575	845	2460	1372	989	2645	1152	624	497	997	2539	873	1070	2598	2192	1137	850	2295	597	746	1874	3069	772	1560	2158	2626	1516	752	597	793	986	823	1191	1816	3422	428	1254	1248
ENSG00000067064_IDI1	263	112	57	121	198	161	63	46	264	134	434	88	73	182	101	60	163	118	191	114	166	230	116	298	118	672	648	316	183	182	291	522	218	113	90	174	275	141	195	103	171	80	240	108	267	149	40	126	142
ENSG00000067066_SP100	529	486	797	477	691	390	200	487	1428	760	1143	724	305	511	516	1051	390	503	407	208	539	945	224	1171	270	3553	3870	1689	758	1309	1941	2434	975	659	681	1192	1217	928	482	209	572	277	890	699	691	837	256	580	558
ENSG00000067082_KLF6	1784	929	1394	1118	1154	420	697	784	1537	674	2911	673	610	762	1145	1322	1203	605	612	1180	613	726	414	2211	731	6351	8476	4214	1149	1899	2789	3464	1187	670	766	1162	1143	830	517	737	1224	501	830	550	951	1209	607	442	867
ENSG00000067113_PPAP2A	9	0	1	7	11	2	0	0	34	12	2	0	0	1	0	1	12	5	0	0	5	0	7	0	8	7	12	3	4	3	0	9	3	19	3	2	4	0	0	9	1	0	0	0	9	0	0	1	0
ENSG00000067141_NEO1	0	1	1	3	0	127	6	0	40	0	49	5	27	0	3	13	0	13	0	26	6	11	0	85	0	150	87	9	39	70	213	417	27	0	10	9	0	13	3	0	14	10	20	2	22	6	1	0	0
ENSG00000067167_TRAM1	16937	12776	9429	9081	12763	8641	12650	4707	23192	15788	17173	16783	11478	23004	14493	13378	20102	16544	6896	10024	13310	17092	7757	18858	7509	11661	13519	15748	19161	14746	14360	17692	14421	26224	26805	22668	17871	21129	20030	8920	16055	10664	16458	15934	20233	22930	7775	21735	18010
ENSG00000067177_PHKA1	6	1	0	0	45	6	1	0	10	57	0	0	17	1	0	0	5	21	0	0	0	16	0	5	0	44	11	1	13	11	0	43	12	4	0	10	0	13	0	0	0	1	34	20	8	20	1	0	13
ENSG00000067182_TNFRSF1A	42	68	417	473	42	24	66	25	237	7	159	25	20	3	87	323	22	28	79	39	34	14	1	491	48	1985	3373	1071	197	449	749	980	301	5	19	37	88	61	23	15	20	25	102	5	79	106	40	12	8
ENSG00000067191_CACNB1	279	71	20	42	65	88	121	121	100	87	171	119	93	133	198	93	135	94	19	70	149	117	16	126	50	158	120	183	193	134	128	224	109	67	160	197	82	100	171	58	101	84	107	148	161	96	72	124	159
ENSG00000067208_EVI5	336	235	79	118	367	87	97	191	597	678	318	376	267	569	417	498	485	409	458	308	535	503	253	665	45	324	736	571	628	465	478	536	579	688	1041	792	557	1181	613	208	474	457	631	456	575	730	467	731	587
ENSG00000067221_STOML1	0	0	0	0	6	5	0	2	4	0	1	3	10	0	0	2	3	2	0	1	1	7	0	5	0	16	15	4	1	5	13	19	1	0	0	0	0	1	0	0	3	0	0	0	2	0	0	0	0
ENSG00000067225_PKM	119899	88069	99931	43166	144762	124083	92249	91695	178596	131199	175519	104958	77176	109810	106776	91458	169277	99273	90980	107245	132592	127554	70312	108612	45782	63168	69975	136422	118601	105632	108323	97116	134674	127762	140683	147712	112148	140809	186895	64617	97578	148648	161612	130969	133720	135977	77897	134019	154481
ENSG00000067248_DHX29	659	398	662	468	913	462	202	309	835	922	1158	607	616	820	676	577	913	838	150	391	854	913	329	846	371	1048	1113	981	907	837	1033	1199	894	1162	1144	985	1197	1180	786	323	1023	615	902	739	1005	1081	338	1008	750
ENSG00000067334_DNTTIP2	204	156	282	75	96	12	277	34	398	49	255	128	110	168	179	257	134	223	52	20	175	152	42	323	127	1485	972	460	306	382	555	922	339	187	167	164	199	303	106	107	161	128	350	139	305	215	78	201	190
ENSG00000067365_METTL22	348	994	781	338	404	985	616	384	593	301	955	220	446	396	311	479	572	394	730	420	719	338	984	266	183	263	282	275	331	306	449	379	392	473	519	344	433	314	856	804	469	432	400	520	558	600	342	364	269
ENSG00000067369_TP53BP1	225	103	182	205	277	13	5	177	294	212	588	162	96	191	183	321	234	168	25	59	267	244	67	314	354	860	855	322	240	330	461	640	349	160	123	211	270	156	143	110	154	134	168	181	219	230	217	130	92
ENSG00000067445_TRO	0	0	0	48	14	3	1	1	8	0	0	0	0	1	0	8	0	0	0	0	0	0	0	1	0	30	30	9	1	0	17	14	13	1	0	0	0	0	0	0	1	0	0	0	0	9	0	4	0
ENSG00000067533_RRP15	15	62	22	19	5	1	1	23	40	0	40	2	0	27	31	26	11	22	0	5	5	29	0	37	0	92	58	19	8	34	31	100	13	6	2	14	15	64	20	6	17	45	17	24	32	40	0	6	2
ENSG00000067560_RHOA	12782	8608	6770	4805	12131	6695	7873	7488	15711	9489	16587	10173	7226	9906	8761	10227	14642	10342	5745	6083	10845	11601	4752	10118	4814	7451	8249	11277	10453	10237	9399	9485	12458	11443	11263	10897	12863	10910	15009	5405	9162	7938	13605	11636	12830	12496	4474	12881	11858
ENSG00000067596_DHX8	259	148	165	122	118	175	341	143	349	155	326	160	146	160	274	261	306	180	121	48	107	99	130	309	69	1264	1136	417	288	438	446	693	304	161	161	152	321	241	158	103	178	150	231	192	132	148	75	115	130
ENSG00000067601_PMS2P4	169	250	0	205	244	2	65	39	151	0	148	89	79	80	91	114	143	216	31	121	61	353	64	136	88	389	195	145	135	151	349	419	307	189	159	204	414	249	297	73	159	189	242	90	282	58	36	197	363
ENSG00000067606_PRKCZ	0	0	0	13	0	40	14	0	17	0	33	0	0	0	8	49	0	0	0	14	1	0	0	27	0	149	108	33	6	23	46	84	10	3	0	0	1	3	0	0	0	0	3	0	0	13	3	0	0
ENSG00000067646_ZFY	699	285	168	230	456	345	11	8	719	438	729	339	0	357	497	413	534	654	49	48	452	468	0	471	131	0	1	672	2	824	637	1281	634	448	508	470	392	543	502	83	570	0	650	743	473	353	77	479	609
ENSG00000067704_IARS2	209	70	300	49	201	83	80	99	476	143	488	57	103	420	184	158	238	110	35	117	199	165	174	396	150	1111	708	290	268	490	497	993	261	226	195	168	159	301	133	45	187	165	224	242	181	168	164	110	215
ENSG00000067715_SYT1	0	0	0	0	9	1	0	0	0	0	0	6	0	0	2	0	0	0	0	0	0	10	0	0	19	0	12	1	1	1	0	1	2	0	2	0	0	0	0	0	0	0	0	0	0	7	0	0	0
ENSG00000067798_NAV3	0	7	1	0	0	0	0	3	24	6	0	1	0	3	0	0	13	3	0	29	5	15	0	18	0	12	30	10	11	4	8	8	0	0	31	4	2	13	1	0	8	0	0	0	1	2	0	0	0
ENSG00000067829_IDH3G	378	374	213	102	504	52	379	234	481	221	623	311	200	324	254	229	516	180	136	256	349	330	147	390	249	678	525	437	462	453	451	482	510	227	235	404	370	313	648	228	368	264	528	326	390	313	108	462	352
ENSG00000067836_ROGDI	181	131	62	109	228	29	69	131	233	95	139	133	169	181	78	212	197	157	52	42	136	161	98	82	78	59	134	63	204	178	105	66	219	81	92	36	191	37	164	60	72	86	68	117	258	122	30	151	113
ENSG00000067840_PDZD4	3	66	56	3	83	5	19	28	261	3	59	56	17	31	80	101	21	13	59	14	34	12	16	134	6	756	234	49	77	97	229	369	88	17	6	22	2	42	36	14	54	46	178	16	35	72	30	53	3
ENSG00000067842_ATP2B3	0	0	0	0	0	2	0	0	0	0	0	0	0	0	0	0	0	0	0	0	0	0	0	0	0	0	0	0	0	0	0	0	0	0	0	0	0	0	0	0	0	0	0	0	0	0	1	0	0
ENSG00000067900_ROCK1	4754	2843	1979	1979	3629	1752	2459	2638	4760	4247	5786	3047	3044	4213	3756	3658	6397	3276	1649	1733	3581	4282	1469	4932	1702	7015	8547	7582	4330	5069	4671	7369	5311	3815	5873	4604	6861	5318	4076	1539	4604	2515	4219	4033	4714	4981	2405	4146	3831
ENSG00000067955_CBFB	186	24	217	81	82	61	66	425	307	117	213	156	238	403	312	292	149	178	152	81	215	122	93	263	100	675	421	155	192	340	289	537	264	286	213	249	297	260	212	71	199	298	147	182	245	219	117	194	247
ENSG00000067992_PDK3	1457	1057	799	534	1165	274	701	775	1773	1255	1801	1635	797	1334	1256	960	1513	1215	526	505	1305	1125	524	1305	576	948	1131	1435	1074	1249	1117	1330	1681	1406	1719	1558	1484	1511	1321	464	1592	986	1689	1411	1376	1402	686	987	1377
ENSG00000068001_HYAL2	12	4	6	0	0	18	0	0	0	0	0	2	0	0	0	0	0	0	0	0	2	0	0	3	0	26	27	16	4	13	1	8	7	0	0	0	1	0	1	0	0	0	4	0	0	0	3	1	0
ENSG00000068024_HDAC4	39	38	15	61	35	0	45	4	165	2	46	11	4	6	69	119	19	10	22	6	42	18	0	140	5	684	825	225	89	172	218	456	59	5	6	9	21	41	7	9	23	0	50	11	18	36	73	19	19
ENSG00000068028_RASSF1	62	20	17	11	56	3	0	68	116	16	172	19	34	16	37	33	49	14	2	25	20	9	7	128	28	635	181	81	44	67	138	315	64	8	58	72	14	47	14	14	26	18	100	21	15	35	31	13	33
ENSG00000068078_FGFR3	0	0	0	0	7	5	0	2	0	0	0	0	0	3	0	0	0	2	0	0	0	0	0	2	0	0	0	1	0	0	0	0	1	0	0	0	0	0	0	0	2	0	4	0	3	0	0	0	0
ENSG00000068079_IFI35	26	24	21	81	4	2	0	0	84	4	52	6	2	0	13	30	2	0	10	13	9	0	0	77	0	188	150	43	18	60	76	146	32	11	1	11	2	8	0	3	3	0	20	2	13	11	1	1	0
ENSG00000068097_HEATR6	11	13	1	0	1	15	0	1	76	0	29	1	0	8	3	26	0	0	5	13	9	12	0	66	0	230	133	34	45	102	95	216	12	7	1	16	0	22	7	0	0	13	13	1	27	25	0	6	0
ENSG00000068120_COASY	251	126	59	96	204	99	28	106	365	120	325	166	253	85	112	223	317	175	235	85	196	133	128	226	71	371	401	221	188	269	195	346	192	146	138	209	203	124	231	75	193	155	190	127	148	118	93	150	150
ENSG00000068137_PLEKHH3	4	0	0	0	0	7	0	3	0	0	0	0	0	0	0	0	0	2	0	0	0	0	0	0	0	0	1	0	0	0	0	4	0	0	0	0	0	0	0	0	0	0	0	1	0	0	16	0	0
ENSG00000068305_MEF2A	2177	1117	644	589	1369	576	552	1153	2183	1174	1861	1326	1724	1691	1248	1108	1514	1646	685	862	1534	1142	539	1617	1001	1062	1621	1752	1646	1152	1518	1537	1536	1344	1865	1770	1852	1352	1844	573	1523	722	1454	1352	1662	1763	937	1147	1309
ENSG00000068308_OTUD5	1653	1175	348	381	1815	372	799	1287	2136	959	2422	1175	1203	930	1287	1336	2005	1127	590	725	1396	1318	533	858	587	1725	1480	2030	1669	1274	1312	1239	1813	1073	1144	1308	1697	814	1887	710	1197	826	1453	1175	1472	1361	561	1410	1219
ENSG00000068323_TFE3	510	128	434	159	249	114	217	366	606	392	645	419	283	462	428	433	620	502	273	219	383	499	159	415	78	496	866	664	414	451	476	512	542	459	557	410	583	541	362	204	328	447	627	537	473	413	251	378	505
ENSG00000068354_TBC1D25	828	284	440	192	1074	505	438	555	1348	499	970	644	536	575	605	466	618	590	225	393	631	605	489	590	515	827	442	651	612	592	508	547	672	636	676	736	458	566	766	379	560	597	746	730	804	666	263	640	701
ENSG00000068366_ACSL4	3774	2392	1475	1822	2059	756	2461	1905	3910	2872	4161	2840	3082	3818	2802	2175	4494	3951	1449	1538	2716	3912	1043	2825	2067	2687	2952	3440	3729	3234	3058	3262	5394	4688	5005	3633	6184	3829	3948	1543	4212	1929	3037	3772	4118	4951	1811	4331	4439
ENSG00000068383_INPP5A	3445	1293	989	730	2745	772	1403	2129	3459	1820	3485	2317	2031	2063	2070	1611	2096	1786	1363	1070	2206	1749	1008	2213	1065	1362	1317	2784	2514	1590	2297	1736	2360	2034	2753	3003	2791	1856	2327	1047	2151	1226	2186	2070	2596	2371	1222	1993	1868
ENSG00000068394_GPKOW	0	24	10	35	10	18	23	11	132	33	26	14	21	26	15	38	33	28	6	19	27	15	3	63	0	304	225	58	63	109	97	227	32	9	2	34	45	63	5	32	7	23	37	9	30	19	10	28	1
ENSG00000068400_GRIPAP1	969	449	739	363	766	482	464	1062	1408	544	1058	750	546	883	800	824	1145	675	454	613	696	655	736	857	361	1430	1426	970	1183	1168	1276	1183	1273	764	748	993	1117	721	960	569	880	794	1149	740	906	879	579	818	747
ENSG00000068438_FTSJ1	27	13	9	81	25	23	1	21	41	0	74	0	0	10	12	3	3	7	15	4	7	2	7	44	0	263	85	36	29	62	46	153	18	13	2	19	3	22	3	8	11	30	32	5	8	22	0	6	2
ENSG00000068489_PRR11	101	29	83	50	120	13	8	37	264	153	179	113	166	118	86	109	126	173	0	81	153	142	153	147	45	119	151	108	140	122	165	143	151	219	279	181	176	234	103	50	184	91	178	99	164	164	89	166	85
ENSG00000068615_REEP1	4	0	0	0	0	0	0	3	0	29	1	2	0	6	2	6	2	0	0	0	10	15	0	1	0	2	3	5	10	1	3	8	0	0	0	4	4	10	0	0	7	3	3	0	34	1	3	8	6
ENSG00000068650_ATP11A	1720	971	351	383	1461	306	492	1029	1274	2205	3620	991	636	957	2106	1990	2244	922	370	548	1104	1109	801	1765	518	1265	2329	1988	1647	1612	1222	1769	1392	958	1345	1901	1792	711	1297	419	1160	1592	1767	1702	1898	670	1177	1269	1264
ENSG00000068654_POLR1A	17	44	44	42	39	106	50	20	139	13	123	28	39	23	66	41	18	9	22	9	47	14	27	129	0	612	278	79	64	144	179	395	64	17	20	25	28	87	34	20	33	6	34	10	42	94	57	53	25
ENSG00000068697_LAPTM4A	177	242	365	195	157	72	246	142	440	245	425	89	108	204	218	313	269	235	0	119	164	163	124	490	149	1138	1299	519	332	503	558	776	357	260	146	219	464	283	222	7	266	218	325	279	421	288	127	172	241
ENSG00000068724_TTC7A	92	38	211	9	54	7	45	82	150	26	215	32	35	49	31	62	103	20	21	48	52	13	64	127	29	488	511	130	81	258	220	322	71	31	28	31	34	94	30	4	31	41	33	69	76	69	20	51	34
ENSG00000068745_IP6K2	74	39	50	20	47	21	6	15	180	47	149	29	23	31	58	83	66	40	3	24	20	32	88	115	76	561	422	177	70	118	214	407	104	32	22	50	42	85	21	10	51	51	77	30	103	49	80	42	15
ENSG00000068781_STON1-GTF2A1L	1345	593	597	376	1266	404	697	381	1314	1288	1957	1419	946	1055	1126	732	1341	1034	400	230	1138	1583	180	1214	849	736	929	1731	1536	1056	828	1257	1566	1480	1592	1175	1466	1297	1704	233	1198	418	1258	1353	1301	1151	712	1291	1606
ENSG00000068784_SRBD1	395	233	402	161	343	161	185	240	610	401	650	448	258	374	224	257	388	442	167	122	398	448	202	495	198	800	494	544	443	371	634	710	531	678	676	587	649	616	457	155	353	431	420	462	455	574	287	485	350
ENSG00000068793_CYFIP1	2181	433	190	342	1387	566	819	1835	2246	1455	2728	1048	1412	1322	1563	1093	3137	1755	651	673	1668	1901	629	1649	569	1006	879	1212	1642	1451	1844	1455	2782	1330	2052	1475	3742	1169	1885	562	1950	1182	1440	1973	1967	1340	631	1690	1511
ENSG00000068796_KIF2A	121499	103434	56027	52334	123076	65990	75345	62468	173097	147601	150028	112678	119094	119779	126999	97084	156704	123508	58030	53283	119306	131179	52142	128677	71040	63402	84525	125480	136918	105182	102549	110540	160357	154018	208988	145769	135660	128909	162381	63195	112926	109275	154688	123135	140447	147357	81223	171521	156866
ENSG00000068831_RASGRP2	10920	7660	5945	4587	12210	5933	8329	9145	14197	8643	15871	9756	5774	10249	10149	7225	10874	5900	7166	8422	7862	9739	6194	9423	4870	11062	8891	14907	11480	7536	10198	11089	8626	7332	12409	11860	8173	7121	9905	6784	8571	9116	10272	9277	11095	9458	4332	8678	7230
ENSG00000068878_PSME4	2676	1233	1987	1122	2804	1248	2011	1523	3138	2684	8111	2365	1647	2105	2643	1943	1841	1754	1185	1017	1850	3218	798	4384	961	4197	5161	4594	2773	2912	3445	5341	1861	1505	3543	3024	1549	3712	1754	688	2421	1400	3550	2328	2958	1483	1042	1857	3067
ENSG00000068885_IFT80	404	383	439	459	548	468	400	294	988	523	600	615	572	629	687	362	522	754	436	442	606	649	345	708	229	826	792	752	623	710	554	991	828	813	1084	958	764	1070	711	402	626	425	652	800	890	993	282	1059	849
ENSG00000068903_SIRT2	1350	601	731	499	1385	182	759	652	2271	885	1836	728	648	912	1152	890	1116	1017	640	565	1135	853	512	784	589	1210	727	928	1553	788	1139	855	1518	696	833	894	982	690	1185	564	692	671	912	787	1082	1156	391	1072	994
ENSG00000068912_ERLEC1	504	328	2	252	573	36	465	94	664	247	761	287	246	397	386	194	333	348	55	85	401	377	172	374	69	907	463	276	399	528	423	699	581	379	366	293	522	315	453	110	287	239	347	442	473	420	143	304	412
ENSG00000068971_PPP2R5B	69	16	75	83	99	5	103	22	55	0	58	5	30	43	51	211	55	100	0	40	7	18	16	68	97	258	368	104	89	121	76	161	97	8	49	33	119	22	25	0	19	60	18	33	40	53	23	29	9
ENSG00000068976_PYGM	3	0	0	0	0	2	0	25	25	0	0	12	65	0	0	8	0	10	0	12	0	0	0	24	0	183	226	91	19	29	28	100	25	0	0	13	4	11	0	0	7	0	3	0	4	0	0	5	13
ENSG00000068985_PAGE1	0	0	0	0	0	1	0	0	0	0	0	0	0	0	0	0	0	0	0	0	0	0	0	0	0	0	0	0	0	0	1	0	0	0	0	0	0	0	0	0	0	0	0	0	0	0	0	0	0
ENSG00000069011_PITX1	0	1	0	0	0	24	2	1	1	0	0	0	0	0	0	0	0	0	0	0	0	0	0	0	0	0	0	0	1	0	0	0	0	0	1	0	0	0	0	0	0	0	0	0	0	0	0	0	0
ENSG00000069018_TRPC7	0	0	0	0	0	1	0	3	0	0	0	0	0	0	0	0	0	0	0	0	0	0	0	0	0	0	0	0	0	0	0	0	0	0	0	0	0	0	0	0	0	0	0	0	0	0	1	0	0
ENSG00000069020_MAST4	9098	3704	2178	1571	6286	1929	2277	4731	9696	6501	11081	5700	4843	5083	5985	4020	7763	4379	2344	3760	3996	6337	1611	6170	2789	4765	4870	7900	5696	4706	5450	6870	6410	4644	9214	7936	8715	5263	5201	2678	7862	2028	4911	5023	5660	7283	4964	5181	4840
ENSG00000069122_GPR116	5	0	0	0	0	6	0	2	6	6	0	3	0	0	0	0	0	3	0	9	8	2	0	11	77	0	2	1	19	1	0	1	1	0	1	27	63	0	0	29	2	0	0	7	0	0	0	2	16
ENSG00000069188_SDK2	0	10	1	0	0	2	1	1	0	0	0	0	0	0	0	3	0	0	0	0	0	0	15	0	0	21	62	26	6	3	0	7	2	0	0	0	0	1	0	0	0	0	0	0	0	1	7	0	0
ENSG00000069206_ADAM7	0	0	0	0	0	0	0	0	0	0	0	0	0	0	0	0	0	0	0	0	0	0	0	0	0	0	0	0	0	0	0	0	0	0	0	0	0	0	0	0	0	0	0	0	0	0	0	0	0
ENSG00000069248_NUP133	223	281	48	111	227	52	60	103	523	214	358	207	163	165	204	171	223	204	129	94	242	209	154	304	117	1116	585	266	335	371	515	738	300	201	263	247	168	276	232	162	162	143	290	193	304	308	138	220	192
ENSG00000069275_NUCKS1	1338	950	893	718	1077	999	1686	1278	1545	749	2040	901	1346	1507	1163	791	1881	1479	681	1374	1309	1646	679	1445	733	2189	1284	1219	1652	1634	1289	1693	2401	2022	1361	1106	2008	1420	1689	1268	1196	1348	1274	1099	1370	1548	976	1284	1648
ENSG00000069329_VPS35	793	392	472	513	498	39	427	92	933	363	1172	374	605	443	645	508	680	764	508	246	605	533	306	813	395	1700	1901	900	793	887	1036	1422	848	828	619	573	863	599	568	153	594	519	812	433	763	873	243	413	732
ENSG00000069345_DNAJA2	1068	1449	596	732	644	576	1155	420	1251	972	1692	764	512	823	754	761	1210	697	873	807	676	831	434	1023	427	1090	1154	938	844	931	809	1124	889	1010	872	1055	1008	817	947	618	1038	748	1080	952	968	1166	382	807	830
ENSG00000069399_BCL3	2	2	5	4	4	11	4	0	9	1	0	0	0	0	0	17	1	11	4	3	0	2	0	17	0	125	225	100	14	36	31	28	13	0	0	0	1	4	0	0	0	2	1	0	5	5	6	0	5
ENSG00000069424_KCNAB2	217	299	176	177	181	88	62	137	575	56	427	150	128	204	204	268	137	106	42	58	191	142	59	339	119	2024	968	366	386	621	856	1151	283	111	101	195	126	272	169	17	210	87	277	90	204	200	54	120	83
ENSG00000069431_ABCC9	0	1	1	0	0	0	0	1	2	0	0	0	0	5	1	0	3	0	0	0	0	0	0	1	0	0	0	0	4	0	0	0	0	0	0	0	0	0	2	0	0	0	6	0	0	0	0	0	0
ENSG00000069482_GAL	1	0	0	0	0	0	0	0	0	0	28	0	0	0	0	0	0	0	0	9	2	4	0	0	0	2	4	0	0	0	0	7	1	4	0	0	0	0	0	0	5	0	0	0	0	8	0	0	1
ENSG00000069493_CLEC2D	83	36	115	24	73	1	5	54	204	53	203	55	48	23	144	87	56	36	13	7	57	65	0	197	19	1377	526	184	150	315	606	1103	177	98	94	44	27	222	17	42	88	16	118	39	31	138	23	14	7
ENSG00000069509_FUNDC1	278	129	64	212	227	278	216	91	336	267	230	144	171	299	212	140	231	284	44	82	245	212	154	284	157	265	222	209	360	164	180	261	319	327	343	275	399	497	317	123	279	192	373	265	298	287	145	279	253
ENSG00000069535_MAOB	650	342	251	149	442	90	935	572	415	131	896	396	816	564	417	733	1109	773	341	194	874	485	214	301	514	439	163	290	553	471	581	405	1030	687	317	170	1316	129	1105	189	603	258	549	707	891	470	164	555	334
ENSG00000069667_RORA	10	129	152	32	71	3	0	2	279	13	121	17	20	1	98	94	5	0	0	3	37	14	0	247	0	1697	422	115	120	235	640	1232	134	9	8	41	0	92	1	0	39	4	96	20	30	57	2	5	2
ENSG00000069696_DRD4	0	0	20	0	0	0	0	0	0	0	0	0	0	0	5	0	0	0	0	0	0	0	0	6	0	9	2	1	0	0	0	1	1	0	0	0	0	0	0	0	0	0	3	0	0	0	0	0	0
ENSG00000069702_TGFBR3	89	577	428	408	309	423	4	91	1968	28	968	35	36	44	728	519	55	7	118	19	243	47	54	1390	0	11852	3424	655	696	1654	4064	8008	982	32	5	216	27	975	29	20	294	44	437	101	229	283	71	10	4
ENSG00000069712_KIAA1107	33	0	0	36	9	2	1	1	64	22	36	10	33	3	35	43	19	24	37	0	15	19	0	48	33	149	76	32	18	43	29	130	51	21	41	25	39	43	12	5	16	0	34	23	12	26	9	17	11
ENSG00000069764_PLA2G10	0	0	0	0	0	1	0	0	2	0	0	0	0	0	0	0	0	0	0	0	0	0	0	0	0	6	0	0	0	0	0	0	0	2	0	0	0	0	0	0	0	0	0	0	0	0	0	0	0
ENSG00000069812_HES2	0	0	0	0	0	0	0	0	0	0	0	0	0	0	0	0	0	0	0	0	0	0	0	0	0	0	0	0	0	0	0	0	0	0	0	0	0	0	0	0	0	0	0	0	0	0	0	0	0
ENSG00000069849_ATP1B3	89	120	128	114	173	71	25	185	350	134	181	112	73	151	89	176	103	126	84	69	104	74	57	174	18	450	229	115	145	148	254	347	175	129	189	123	210	131	141	62	106	54	163	74	179	152	106	93	156
ENSG00000069869_NEDD4	650	501	697	534	304	206	461	275	634	690	640	611	387	898	639	466	860	563	638	483	727	766	431	520	316	532	619	637	631	567	648	733	918	713	952	897	934	638	517	531	603	608	886	612	743	975	378	666	564
ENSG00000069943_PIGB	283	79	244	160	167	27	102	29	291	124	343	164	94	294	213	155	294	259	131	115	206	196	97	244	225	488	877	342	260	208	196	320	369	282	244	190	318	322	231	47	236	103	185	167	323	320	94	188	178
ENSG00000069956_MAPK6	1347	763	309	183	825	425	531	615	1545	412	1741	700	1109	774	556	482	669	1649	202	161	856	1028	149	503	601	489	518	983	1016	889	972	936	1836	947	597	1048	1403	363	972	537	1170	227	810	667	1321	1456	257	646	890
ENSG00000069966_GNB5	6968	3254	1473	1545	5228	2337	2960	5248	7722	2541	6019	5178	2714	5046	2389	4082	5666	5129	3263	2634	4542	5015	2590	2426	1654	2791	1836	4694	4242	2779	4749	2518	7117	4774	3113	5515	5182	3185	5682	2150	4589	3354	4949	4302	5778	4847	1630	4798	5972
ENSG00000069974_RAB27A	58	81	194	200	107	7	27	26	333	109	278	57	40	69	82	403	97	79	74	16	121	59	20	428	7	1550	1672	461	197	443	594	1301	292	54	64	25	75	161	65	20	93	59	208	52	111	153	6	100	38
ENSG00000069998_CECR5	3	7	32	15	0	10	0	2	27	0	44	6	0	1	6	0	0	0	5	0	1	0	0	18	0	69	35	8	10	22	25	60	5	0	0	29	0	1	0	0	4	25	0	4	1	13	2	3	0
ENSG00000070010_UFD1L	1348	880	721	947	1303	779	1062	656	1586	894	1991	1006	776	1299	859	677	1420	980	857	951	1256	985	683	1264	438	1234	965	1374	1320	969	978	1383	1249	1310	1304	1119	1483	1059	1248	861	1022	1013	1376	1179	1173	1203	454	1254	1451
ENSG00000070018_LRP6	39	71	39	5	15	65	0	73	96	89	57	78	24	71	124	58	57	46	47	31	63	72	52	72	40	45	91	62	80	81	81	81	116	97	146	70	83	144	75	15	21	88	59	82	76	81	173	84	75
ENSG00000070019_GUCY2C	0	0	0	0	0	0	0	0	0	0	0	0	0	0	0	0	0	0	0	0	0	0	0	0	0	0	1	1	0	0	0	0	0	0	0	0	16	0	0	0	0	0	0	0	0	0	0	0	0
ENSG00000070031_SCT	0	0	0	0	0	0	0	0	0	0	0	0	0	0	0	0	0	0	0	0	0	0	0	0	0	1	2	1	0	0	0	0	0	0	0	0	0	0	0	0	0	0	0	0	0	0	0	0	0
ENSG00000070047_PHRF1	43	84	89	72	70	36	27	24	207	22	212	43	10	17	65	145	35	20	75	23	64	20	3	183	0	1160	646	180	125	269	241	757	115	23	46	48	39	90	12	50	64	42	95	35	21	67	36	45	19
ENSG00000070061_IKBKAP	136	175	269	99	128	47	5	95	568	0	216	81	1	106	225	134	72	37	0	38	111	38	28	407	19	2239	1066	266	265	530	741	1589	242	47	70	103	84	272	21	29	93	62	169	83	185	159	108	88	43
ENSG00000070081_NUCB2	896	1215	614	933	924	751	1209	846	1298	794	1136	838	806	970	1059	644	1398	1013	522	610	891	1105	594	1230	285	1231	1132	888	1118	1142	829	1443	1362	1429	1697	1108	1242	1657	1262	525	853	713	1117	922	1011	1409	736	1141	1258
ENSG00000070087_PFN2	0	6	0	1	3	51	0	0	2	0	0	0	0	0	0	0	0	0	11	0	0	2	3	4	1	10	7	5	5	0	5	12	4	1	1	0	0	0	0	0	0	0	4	0	0	1	6	0	0
ENSG00000070159_PTPN3	0	1	1	0	0	15	3	0	0	0	3	0	0	0	0	0	0	0	0	3	0	1	0	2	0	5	0	0	0	12	6	0	0	0	0	0	0	0	0	0	0	0	0	4	0	0	28	0	0
ENSG00000070182_SPTB	21786	6703	2973	3372	11153	3592	4796	19725	19467	15268	20270	17702	11173	16254	14430	20963	29695	11534	6014	7856	15339	18791	5580	11987	7294	9404	13809	20628	21140	16935	10429	13747	21401	9369	17710	16724	19305	10114	14652	6016	16538	12361	20212	18411	17966	14370	8232	16741	13986
ENSG00000070190_DAPP1	24360	14025	8082	11652	15612	7176	13707	12925	28032	17229	19573	18777	15970	23452	14167	11025	17704	18063	9447	11011	13827	15019	7965	17396	5985	14650	10516	20287	18231	15550	13620	16616	21885	27699	28315	25976	28566	19202	18720	11571	20427	8449	18728	15452	20700	25188	11311	18282	18770
ENSG00000070193_FGF10	0	0	0	0	0	3	0	0	0	0	0	0	0	0	27	0	0	0	0	0	0	0	0	0	0	0	0	0	0	0	0	0	0	0	0	0	0	0	0	0	0	0	0	0	0	0	0	0	0
ENSG00000070214_SLC44A1	3545	1707	1281	654	3295	1748	1972	2249	5929	3573	4067	3990	2997	4560	2798	3155	4321	3558	611	1559	3120	3320	1098	2738	1254	2094	2068	3171	3813	4288	2718	2492	4205	3506	3468	3258	3566	3669	4332	1444	3434	2083	4806	3077	3277	4172	1718	3172	4221
ENSG00000070269_TMEM260	141	143	179	178	95	167	170	76	269	200	150	197	126	78	193	59	245	226	58	74	127	219	156	269	24	234	345	310	293	243	211	281	176	230	278	286	320	277	182	78	161	392	138	276	175	193	53	147	167
ENSG00000070366_SMG6	108	37	88	58	55	82	8	70	256	51	195	81	53	137	148	115	190	109	12	28	137	64	41	182	22	986	471	131	185	221	327	474	161	84	83	106	79	127	45	93	132	109	162	124	58	110	31	63	63
ENSG00000070367_EXOC5	1545	1161	705	602	821	739	1231	595	1504	1131	1879	962	787	1581	1161	845	1672	1481	368	447	1186	1344	247	1513	403	1606	1217	1545	1524	1306	1195	1824	1773	1705	1721	1326	2049	1643	1616	496	1428	663	1236	1181	1771	1724	638	1586	1809
ENSG00000070371_CLTCL1	0	4	21	64	0	4	0	2	12	0	0	0	0	0	0	63	3	0	2	0	0	0	0	48	0	36	152	24	0	17	9	33	1	2	2	0	7	1	2	0	0	0	0	2	0	13	0	1	0
ENSG00000070388_FGF22	0	0	0	0	0	0	0	1	0	0	0	0	0	0	0	0	0	0	0	0	0	0	0	0	0	2	0	0	0	0	0	0	0	0	0	0	0	0	0	0	0	0	0	0	0	0	0	0	0
ENSG00000070404_FSTL3	0	0	0	0	0	5	0	0	0	0	0	0	0	0	11	0	0	0	0	0	0	0	0	3	0	5	13	1	0	1	0	6	0	0	0	0	0	0	0	0	0	0	0	0	0	1	6	0	0
ENSG00000070413_DGCR2	799	526	468	177	811	556	599	699	1972	621	1251	788	321	558	610	710	563	398	366	379	440	836	378	584	387	739	738	919	825	717	767	786	942	820	1170	1049	435	634	898	323	867	499	724	582	893	756	488	364	579
ENSG00000070423_RNF126	6	5	9	0	0	29	0	3	32	4	37	6	8	17	10	23	6	5	17	4	10	4	5	33	0	163	62	19	21	26	78	123	13	4	2	8	5	20	6	7	14	11	16	6	6	10	4	12	6
ENSG00000070444_MNT	47	4	1	34	48	1	2	44	108	58	136	69	74	123	80	153	100	64	46	76	78	92	61	140	22	233	180	121	108	113	72	177	96	77	93	118	65	67	49	49	53	96	81	74	74	58	111	70	77
ENSG00000070476_ZXDC	41	28	37	24	60	11	11	4	61	7	82	18	0	30	71	70	9	7	0	30	23	25	6	102	20	418	399	117	56	85	111	203	44	8	31	16	25	36	29	4	15	6	30	3	6	27	8	3	14
ENSG00000070495_JMJD6	46	20	17	57	14	24	4	40	65	0	68	18	6	37	37	66	11	10	0	33	21	11	34	74	21	334	554	212	54	69	115	209	43	21	6	22	52	26	26	14	23	2	32	15	21	24	44	1	31
ENSG00000070501_POLB	30	318	340	27	62	36	53	67	51	50	89	35	10	35	33	56	24	61	59	36	53	43	36	182	19	410	571	180	144	136	206	253	123	84	135	110	96	123	89	14	73	25	93	92	119	57	82	62	78
ENSG00000070526_ST6GALNAC1	15	0	2	2	0	3	0	1	11	0	0	0	0	0	0	0	0	0	0	0	0	0	0	0	0	0	3	0	0	2	0	0	3	0	0	0	0	0	0	0	0	0	0	0	0	0	1	0	0
ENSG00000070540_WIPI1	4684	2097	1319	1483	3897	1030	1954	2436	4357	2101	3940	3214	2543	2962	3481	3076	3263	2261	1651	1411	2739	2353	1430	2036	1487	1947	2314	3506	2572	3040	3222	1967	3702	3753	2569	2779	2388	2446	3507	1130	1841	2001	2828	2521	2716	4154	1550	1845	2193
ENSG00000070601_FRMPD1	0	0	0	0	0	24	1	4	0	0	0	0	0	0	0	0	0	0	0	0	0	0	0	0	0	2	0	0	0	0	0	0	0	0	0	0	0	0	0	0	0	0	0	0	0	0	0	0	0
ENSG00000070610_GBA2	473	239	137	86	341	212	315	329	528	295	647	240	340	242	351	292	452	278	236	220	310	272	135	430	204	1467	1147	667	417	602	767	1039	594	158	287	368	544	253	319	166	353	182	411	310	700	378	146	261	276
ENSG00000070614_NDST1	7970	3053	3532	979	8349	2219	3637	5816	11217	6587	10896	7126	6642	5510	7659	6237	7630	5840	1542	2825	5146	6469	2929	4177	3446	3655	4180	7339	8698	7246	5634	3761	7045	5920	7310	6818	3583	5895	7794	2752	5370	5285	7546	5931	5637	4867	4701	5362	5724
ENSG00000070669_ASNS	4	2	18	34	0	120	1	0	52	7	57	7	0	1	42	1	17	6	0	0	24	88	62	75	8	401	197	46	47	46	99	323	42	16	10	11	3	58	4	9	33	15	56	9	0	5	38	16	24
ENSG00000070718_AP3M2	202	144	261	101	211	15	146	271	177	184	465	177	212	152	178	136	203	126	136	137	201	332	344	248	66	216	165	215	168	111	214	218	61	188	222	256	58	266	102	71	97	270	174	113	122	135	150	136	157
ENSG00000070729_CNGB1	0	0	0	0	0	2	0	1	0	0	0	0	0	0	0	0	0	0	0	0	0	0	0	0	0	0	0	0	0	0	0	0	0	0	0	0	0	0	0	0	0	0	0	0	0	0	0	0	0
ENSG00000070731_ST6GALNAC2	0	1	1	4	0	13	0	0	0	0	0	0	0	0	0	21	0	0	5	0	0	1	22	20	0	35	273	128	8	44	46	2	33	4	0	14	3	1	0	0	6	0	9	2	0	9	9	0	0
ENSG00000070748_CHAT	0	0	0	0	0	0	0	0	0	0	0	0	0	0	0	0	0	0	0	0	0	0	0	0	0	0	0	0	0	0	0	0	0	0	0	0	0	0	0	0	0	0	8	0	0	0	0	0	0
ENSG00000070756_PABPC1	37019	20254	15593	9430	30108	13822	24084	31245	55611	28565	32177	27858	28944	49453	24337	44158	54941	33697	13440	12658	34420	29453	9961	21330	19955	28013	22338	23083	27414	37641	20143	21372	41827	27637	29388	25917	36558	31749	35727	11866	33890	21916	37655	32728	32654	33916	21743	38575	36648
ENSG00000070759_TESK2	150	25	143	180	126	0	51	75	168	165	42	53	86	116	137	96	149	91	34	68	136	122	6	145	9	179	142	128	84	86	83	143	133	183	148	129	171	182	107	75	118	71	103	124	137	147	140	120	114
ENSG00000070761_C16orf80	9	3	0	0	60	14	1	0	37	11	37	9	1	14	17	17	40	21	13	1	11	12	13	29	0	167	92	23	30	29	41	63	19	5	8	3	1	17	4	7	9	24	17	14	41	7	4	6	7
ENSG00000070770_CSNK2A2	414	128	122	67	587	82	292	254	529	417	804	242	291	306	367	375	631	440	55	125	360	363	244	437	174	859	492	447	435	598	343	725	470	355	380	334	695	344	509	226	299	300	505	492	382	385	266	360	324
ENSG00000070778_PTPN21	0	0	0	0	12	6	0	1	7	0	1	0	0	0	0	0	0	0	0	0	4	2	0	1	0	0	1	16	0	1	0	3	0	0	6	0	0	1	0	5	0	0	0	0	0	0	0	1	2
ENSG00000070785_EIF2B3	7	44	0	0	2	14	0	3	71	0	23	6	10	8	24	5	0	19	3	0	4	7	12	36	17	178	96	24	16	40	66	127	25	5	45	32	27	26	20	4	12	11	5	8	7	12	11	20	8
ENSG00000070808_CAMK2A	0	0	0	0	0	0	0	16	0	0	0	0	0	0	0	5	0	0	0	0	0	0	0	0	0	0	0	0	0	7	0	2	5	0	0	14	0	0	0	0	0	0	0	1	0	0	0	0	3
ENSG00000070814_TCOF1	25	83	87	2	158	40	3	0	421	14	236	39	79	39	155	86	1	13	121	8	58	17	86	276	0	1945	1026	207	206	352	698	1282	168	2	0	29	22	176	7	0	49	0	81	16	27	101	111	1	12
ENSG00000070831_CDC42	23228	27757	17618	20444	18019	14577	21901	8396	22645	16463	24500	18032	19050	24394	18071	12157	23396	18283	18782	21058	15362	20208	15565	21090	12285	15609	14648	18902	18726	15896	16281	19976	18863	23673	26996	21385	19661	19325	23708	18338	18386	18485	20591	18260	22036	22829	10214	19900	21728
ENSG00000070882_OSBPL3	69	73	55	30	37	36	2	0	303	29	293	26	29	55	65	82	41	60	118	10	76	50	24	209	0	1405	624	221	131	286	434	602	168	44	47	84	88	105	43	11	86	55	85	56	63	131	20	44	85
ENSG00000070886_EPHA8	0	0	0	0	0	1	0	3	0	0	0	0	0	0	0	0	0	0	0	0	0	0	0	0	0	0	0	0	1	0	0	0	0	0	0	0	0	0	0	0	0	0	0	0	0	0	0	0	0
ENSG00000070915_SLC12A3	0	0	0	0	0	1	0	2	0	0	9	1	0	0	0	11	1	0	0	0	0	0	0	3	0	34	59	3	3	0	0	15	3	2	0	0	0	0	0	0	0	0	0	0	0	0	1	7	0
ENSG00000070950_RAD18	111	73	64	89	127	6	70	47	137	175	181	90	135	91	125	122	116	149	51	18	125	105	29	121	19	221	149	161	130	166	133	193	119	122	210	135	153	198	151	35	105	144	164	161	188	137	120	159	110
ENSG00000070961_ATP2B1	118	194	78	262	146	126	65	61	271	156	184	76	104	142	164	269	146	127	97	23	110	158	36	487	177	1873	2990	772	324	624	586	1062	342	78	122	117	201	164	88	84	117	88	171	102	219	324	44	116	88
ENSG00000070985_TRPM5	0	0	0	0	0	0	0	2	0	0	0	0	0	0	0	0	0	0	0	0	0	0	0	0	0	0	0	0	0	0	0	0	0	0	0	0	0	0	0	0	0	0	0	0	0	0	0	0	0
ENSG00000071051_NCK2	6440	3432	1734	1343	6928	2351	3410	4152	9341	6348	10211	6203	4605	5061	5927	5204	6383	4675	3275	3510	5640	5427	3038	5626	3216	3339	3854	8021	5834	5187	6430	5586	6120	5773	6519	7474	7697	5009	6938	2713	5093	3192	7557	6646	7201	5819	2826	5680	5656
ENSG00000071054_MAP4K4	5749	1536	1794	873	3365	966	2232	3175	5575	2805	6668	3913	2553	2903	1969	3288	4221	3792	1861	1430	3473	2063	1655	2472	2550	4572	7580	4802	4576	3146	3906	2897	4100	2836	3252	3019	4685	3940	4797	1692	2252	1963	5613	3266	3275	3432	2114	3530	3340
ENSG00000071073_MGAT4A	23	92	69	45	69	5	1	0	244	3	117	9	0	1	133	109	0	2	39	0	18	0	0	258	0	1432	654	108	107	230	381	1224	143	1	6	38	10	65	4	4	68	1	56	7	49	64	0	0	0
ENSG00000071082_RPL31	940	2120	3969	2652	1051	1412	1384	229	1892	503	1607	376	375	765	743	1021	748	819	1930	1363	696	570	1595	1912	1298	6108	3199	956	1107	1636	2207	4237	944	531	538	844	693	838	644	1046	634	1009	1043	483	917	793	269	583	701
ENSG00000071127_WDR1	65974	43501	33380	27525	53188	32162	47024	35455	72161	46113	78593	44752	30311	45649	45978	42584	65423	38382	32146	35258	50100	50004	35924	33057	20909	27133	31322	52030	44337	40961	47236	40561	45365	50948	50981	48590	50984	44411	52452	23474	35147	47959	60980	54769	49969	48416	21053	47556	36666
ENSG00000071189_SNX13	717	581	594	405	775	1027	583	286	1026	750	1143	666	833	956	1052	793	854	972	393	677	762	958	283	1067	280	1141	1569	1105	1075	852	934	1164	1011	880	1255	939	990	992	829	671	781	991	861	880	1126	930	481	1002	954
ENSG00000071203_MS4A12	0	0	0	0	0	0	0	0	0	0	0	0	0	0	0	0	0	0	0	0	0	0	0	0	0	0	0	0	0	0	0	0	0	0	0	0	0	0	0	0	0	0	0	0	0	0	0	0	0
ENSG00000071205_ARHGAP10	3112	2544	1945	1692	2874	2236	2041	1915	5973	4478	4040	3815	3458	4590	3964	2661	4454	4701	2167	2322	4742	4587	1713	3850	1205	3317	2025	3746	4952	3813	3909	3745	5597	5225	7222	4986	4826	5754	5360	1892	3806	3977	5327	4042	5227	5423	2942	5364	3690
ENSG00000071242_RPS6KA2	7	0	1	0	0	2	0	0	61	25	22	14	0	29	35	27	6	10	10	1	36	9	0	47	0	60	102	13	26	15	20	46	33	17	6	18	0	19	10	1	17	15	10	6	1	4	7	42	1
ENSG00000071243_ING3	585	282	181	440	239	72	137	106	360	199	600	173	214	536	166	198	206	369	55	192	205	347	319	341	384	591	520	378	264	305	333	460	341	418	285	179	432	269	251	126	338	160	427	262	327	297	96	275	518
ENSG00000071246_VASH1	66	111	161	48	105	108	191	72	177	70	282	225	276	140	99	167	130	152	6	78	123	176	69	87	88	117	112	112	277	43	61	102	311	94	94	128	193	62	246	152	75	82	69	117	102	114	60	155	84
ENSG00000071282_LMCD1	7	10	0	0	0	5	0	9	7	10	0	0	0	2	6	0	0	1	0	0	3	0	0	6	0	0	0	3	2	1	5	0	1	1	2	0	4	0	0	1	1	10	1	0	0	4	0	1	1
ENSG00000071462_WBSCR22	29	123	21	118	86	122	11	95	181	53	213	54	57	15	70	45	43	29	69	50	65	103	59	183	0	408	171	85	113	159	234	290	83	52	62	95	122	111	140	34	19	97	181	55	94	49	41	63	127
ENSG00000071537_SEL1L	1518	534	695	302	1213	586	532	874	1308	656	2044	717	808	1341	1095	852	1027	1024	534	612	963	1577	489	1208	494	1466	1586	1119	1254	964	1018	1907	1354	1169	1453	1291	1826	972	988	688	1090	853	918	1262	1202	1107	401	915	1101
ENSG00000071539_TRIP13	51	18	0	0	39	8	60	52	98	13	42	43	14	41	29	16	85	32	0	23	19	21	0	16	0	28	15	35	36	55	12	14	24	50	15	46	47	49	65	0	33	52	64	7	67	51	81	22	17
ENSG00000071553_ATP6AP1	1590	728	883	313	2235	520	1137	1202	3240	766	3144	1051	904	1326	1399	1378	1744	1071	583	788	1583	1588	400	1100	598	1307	1139	956	1152	1497	1595	1485	1781	1421	1300	1458	1558	1037	2010	361	1238	689	1630	1830	1691	1343	579	1666	1449
ENSG00000071564_TCF3	42	2	2	5	19	17	0	7	38	1	37	13	0	10	23	62	6	19	1	1	2	3	0	31	29	178	243	47	62	65	96	149	29	7	0	14	11	25	3	9	4	0	32	8	30	6	25	2	5
ENSG00000071575_TRIB2	25	9	1	28	65	10	48	14	150	29	99	0	6	3	41	10	0	1	0	0	18	1	0	78	43	530	245	80	63	102	116	236	42	3	6	29	9	10	0	0	13	13	94	5	12	1	0	0	0
ENSG00000071626_DAZAP1	295	101	140	46	234	213	97	87	322	105	416	243	171	246	216	371	371	320	65	173	316	271	109	210	97	747	369	257	268	372	373	549	403	216	165	216	261	210	348	133	199	166	385	460	485	168	157	176	211
ENSG00000071655_MBD3	61	27	0	38	12	14	23	61	55	8	114	17	27	22	60	47	105	30	55	47	40	57	23	67	1	100	32	46	32	32	29	85	51	38	10	68	62	25	94	40	59	100	72	72	46	24	11	85	48
ENSG00000071677_PRLH	0	0	0	0	0	0	0	0	0	0	0	0	0	0	0	0	0	0	0	0	0	0	0	0	0	0	0	0	0	0	0	0	0	0	0	0	0	0	0	0	0	0	0	0	0	0	0	0	0
ENSG00000071794_HLTF	887	503	104	311	344	121	43	641	405	382	1314	441	353	554	438	438	1032	425	298	142	697	701	121	798	991	561	737	490	945	366	587	962	509	647	462	615	691	440	426	309	501	134	812	640	695	479	116	588	832
ENSG00000071859_FAM50A	1054	671	848	334	605	850	574	1257	1488	1027	1372	1022	664	854	1132	894	1285	1010	545	710	1176	1360	563	1343	436	1653	1197	980	1274	1132	1227	1555	1496	1029	1673	1194	1392	1370	1394	445	1006	1662	1575	1249	1389	987	530	1049	1329
ENSG00000071889_FAM3A	162	50	7	19	159	98	22	122	191	79	196	104	111	95	71	170	162	107	126	159	108	134	40	80	64	162	87	158	182	185	112	136	168	155	109	118	94	121	163	95	103	100	131	147	145	117	36	120	110
ENSG00000071894_CPSF1	106	77	306	49	65	18	65	23	363	46	235	27	52	39	97	94	41	37	58	29	26	53	21	178	138	1209	364	168	141	160	205	669	138	20	49	32	58	98	23	13	40	4	117	84	83	48	49	56	51
ENSG00000071909_MYO3B	250	161	130	75	51	199	275	88	373	601	654	193	101	59	49	311	581	34	461	0	433	586	589	255	90	124	319	111	1065	174	435	669	439	32	353	11	569	36	365	278	177	568	607	31	429	343	45	624	573
ENSG00000071967_CYBRD1	8	60	21	0	66	4	152	2	62	54	93	36	0	28	13	30	28	17	4	26	33	29	26	79	39	193	386	130	86	104	110	63	38	7	17	76	41	46	11	10	14	27	47	70	34	26	53	34	40
ENSG00000071991_CDH19	0	0	0	0	0	18	0	1	0	0	6	0	0	3	0	0	0	0	0	0	4	0	0	0	0	0	6	0	0	3	0	3	0	0	0	0	0	0	1	0	4	0	2	0	0	0	0	4	0
ENSG00000071994_PDCD2	1	1	0	0	0	16	14	4	45	0	95	13	0	15	17	1	7	4	0	0	10	8	0	62	12	197	148	27	24	72	124	146	30	6	1	6	0	30	11	0	22	0	21	18	7	23	0	4	0
ENSG00000072041_SLC6A15	4	0	0	0	0	1	0	8	2	8	0	4	0	0	0	14	0	2	0	0	5	0	12	0	0	0	0	1	4	3	0	0	12	0	8	0	0	0	0	0	2	7	21	1	0	0	9	1	0
ENSG00000072042_RDH11	10917	5560	4020	3118	6873	4085	5218	3643	11436	5267	8672	5568	4707	8575	5211	4648	6335	5700	4613	7799	5351	6996	4238	5630	3456	5010	3110	5585	7306	6549	5672	5232	7670	8586	7720	7991	9826	6263	7303	5387	7775	4014	7031	5725	8428	7470	3744	6335	7163
ENSG00000072062_PRKACA	1077	199	318	138	579	128	395	534	758	435	1283	500	393	896	480	667	1046	740	435	428	508	799	151	612	270	865	1174	885	858	951	549	794	927	772	695	783	746	542	941	353	595	420	741	705	675	700	352	663	656
ENSG00000072071_LPHN1	1	17	9	0	5	16	9	2	84	0	17	0	13	0	40	26	10	4	0	15	4	0	9	96	20	370	130	26	16	56	106	225	27	0	0	2	0	28	19	18	8	0	11	1	27	10	14	3	11
ENSG00000072080_SPP2	0	0	0	0	0	0	0	0	0	0	0	0	0	0	0	0	0	0	0	0	0	0	0	0	0	0	0	0	0	0	0	0	0	0	0	0	0	0	0	0	0	0	0	0	0	0	0	0	0
ENSG00000072110_ACTN1	80989	24143	20727	12774	73270	15948	28807	49112	96775	67445	93713	58577	46810	68982	50903	50736	85506	69686	22902	29438	59156	66428	18822	47794	29027	33948	32225	65565	63964	53965	54977	46416	89192	64360	70322	61065	78775	56680	90229	22801	57433	33140	70155	66977	74636	71095	35282	72817	75164
ENSG00000072121_ZFYVE26	175	105	42	144	150	120	56	60	606	134	481	90	55	232	195	275	165	100	122	21	111	142	8	391	79	1712	1152	298	278	474	464	1281	310	122	121	90	107	191	174	27	136	50	296	121	178	253	81	112	82
ENSG00000072133_RPS6KA6	0	0	0	0	0	0	0	2	0	0	0	0	0	0	0	0	0	0	0	0	0	0	0	7	0	0	0	0	0	0	0	0	0	0	0	0	0	0	0	0	0	0	0	0	0	0	0	0	0
ENSG00000072134_EPN2	0	0	1	0	0	10	2	8	14	0	10	0	0	0	9	1	0	7	0	1	6	0	8	12	0	26	71	3	11	13	28	20	6	0	0	2	3	0	0	1	1	0	6	0	0	0	24	3	3
ENSG00000072135_PTPN18	2596	1876	1743	1118	2049	1553	1706	1894	2788	1963	2783	2086	2098	2123	2397	1904	2445	2041	1542	2789	1790	1985	2059	1881	1096	1612	1609	2855	2411	1845	1687	1876	1993	2177	2802	2751	1493	2702	2524	2096	2035	2626	2291	2084	2178	2020	1169	1662	1836
ENSG00000072163_LIMS2	3	2	18	0	0	9	0	0	22	18	5	0	0	0	0	0	0	0	0	0	0	0	0	14	1	1	6	1	2	0	0	4	0	0	0	3	0	6	0	0	5	0	0	0	0	0	16	4	4
ENSG00000072182_ASIC4	0	0	0	0	0	4	0	3	0	0	0	0	0	0	0	0	0	0	0	0	0	3	0	0	0	0	1	0	0	0	0	3	0	0	0	0	0	0	0	0	0	0	0	0	0	0	1	0	0
ENSG00000072195_SPEG	1	0	0	8	0	12	0	8	0	0	0	0	0	0	0	2	0	1	3	0	0	0	9	0	0	2	1	1	3	0	1	0	0	1	0	0	0	2	0	0	2	0	1	0	2	1	3	0	0
ENSG00000072201_LNX1	140	3	0	0	21	30	4	1	51	27	44	33	31	81	1	53	114	40	7	11	8	36	0	53	5	48	41	45	56	94	49	32	40	38	28	37	95	41	62	15	112	7	34	34	34	18	5	12	50
ENSG00000072210_ALDH3A2	9	27	16	1	47	48	1	0	59	37	83	2	0	24	14	39	31	7	0	0	17	7	0	91	0	386	222	63	49	91	153	247	56	2	8	10	12	46	9	0	26	0	53	11	13	33	0	14	2
ENSG00000072274_TFRC	246	194	304	109	110	137	116	66	223	155	172	212	34	139	46	687	216	314	111	61	185	126	37	269	238	601	1104	306	502	459	450	613	241	115	231	214	139	263	162	52	122	182	329	106	255	241	159	153	62
ENSG00000072310_SREBF1	5	3	25	7	38	11	0	22	34	0	32	0	9	9	32	16	10	5	31	1	8	13	3	59	13	243	207	56	24	70	119	114	34	13	11	13	0	19	3	0	12	8	10	15	11	26	5	5	1
ENSG00000072315_TRPC5	0	0	0	0	0	0	0	0	0	0	0	0	0	0	0	0	0	0	0	0	0	0	0	3	0	3	0	0	0	0	0	0	0	0	0	0	0	0	0	0	0	0	0	0	0	0	0	0	0
ENSG00000072364_AFF4	962	399	452	118	788	76	267	423	1157	443	1411	540	426	872	722	754	1026	794	257	359	766	758	94	1058	306	1997	1656	1164	1002	1040	972	1603	1088	688	948	820	1159	805	782	230	844	370	690	796	692	789	297	667	845
ENSG00000072401_UBE2D1	0	29	25	78	17	4	1	1	23	16	36	14	15	7	26	144	5	22	23	0	4	4	0	127	0	392	878	435	68	150	81	56	67	10	6	1	15	24	4	0	17	10	23	10	10	61	2	12	16
ENSG00000072415_MPP5	734	260	295	166	341	23	237	321	809	448	527	713	461	318	536	282	644	405	94	195	552	766	274	456	267	340	370	462	400	322	506	542	396	545	1012	821	760	669	522	245	597	237	369	617	536	917	492	678	513
ENSG00000072422_RHOBTB1	8804	4193	2450	1418	8151	2464	3971	5324	8139	6410	11879	5941	4252	5154	6732	6198	5665	5553	1884	2931	4987	6753	3394	4971	3820	2198	6100	6636	8680	5725	5179	5349	7170	6072	7810	7331	8450	6123	8252	3274	4985	4894	6301	5876	8984	6731	3497	4571	6568
ENSG00000072444_ASAH2C	0	0	0	0	0	0	0	0	0	0	0	0	0	0	0	0	0	0	0	0	1	0	0	0	0	0	0	0	0	0	0	0	0	0	0	16	17	0	0	0	0	0	0	0	0	41	0	0	0
ENSG00000072501_SMC1A	739	407	576	526	527	366	264	470	849	536	1092	610	644	773	722	624	1059	590	372	663	679	957	488	955	411	2726	2116	763	1246	1184	945	2068	936	765	785	758	838	1099	684	486	596	1226	924	645	854	775	743	816	774
ENSG00000072506_HSD17B10	36	82	6	6	26	39	1	0	107	7	58	0	0	5	11	30	0	14	19	12	15	4	19	97	55	259	177	37	45	89	43	230	30	0	4	14	4	18	7	4	11	0	30	1	14	5	30	0	0
ENSG00000072518_MARK2	350	113	118	201	333	114	103	152	579	270	794	208	253	127	297	330	308	192	154	84	195	281	87	456	182	1284	1523	779	267	545	553	766	369	157	327	284	201	251	229	61	256	187	322	173	243	259	198	206	114
ENSG00000072571_HMMR	6	88	169	13	49	9	32	47	30	220	70	19	14	130	41	124	59	206	0	12	103	185	79	37	28	49	149	43	50	36	31	67	44	76	93	246	77	284	83	26	24	8	28	113	49	63	28	57	39
ENSG00000072609_CHFR	222	79	89	160	163	52	51	258	413	213	462	240	181	193	192	346	354	166	237	198	173	213	56	450	111	1013	885	355	279	374	446	638	267	122	134	185	157	186	146	72	206	168	260	232	254	197	124	172	128
ENSG00000072657_TRHDE	799	136	272	292	1075	615	547	351	1339	1208	1310	1035	1088	748	745	620	1207	1471	134	562	1309	454	428	540	128	707	219	853	1932	970	818	1013	1241	650	2051	850	447	877	1841	74	1176	402	1216	1003	781	1251	307	1527	1068
ENSG00000072682_P4HA2	0	1	0	14	0	76	0	1	2	0	0	0	0	0	0	0	0	0	0	0	0	2	0	0	0	0	11	0	1	1	0	3	0	0	0	0	0	0	0	0	0	0	0	0	0	0	0	0	0
ENSG00000072694_FCGR2B	0	2	1	0	44	6	3	2	137	0	69	0	0	0	80	0	0	19	0	0	19	0	0	104	0	360	760	135	71	141	110	103	50	0	0	71	15	38	15	1	6	0	14	4	0	22	0	0	3
ENSG00000072736_NFATC3	1403	568	710	379	1423	529	551	422	2915	1917	2208	1345	1418	1292	1570	1634	1257	1370	578	483	1427	1526	483	2144	496	6468	3042	1892	1950	2146	2756	4135	1879	1519	2184	1807	1254	1862	1580	524	1277	1148	1836	1472	1794	1867	1067	1777	1471
ENSG00000072756_TRNT1	150	240	159	88	220	71	175	200	345	172	189	160	190	241	192	132	228	240	154	117	243	198	121	231	152	313	203	224	347	245	265	396	320	438	413	208	375	362	259	84	257	103	316	222	270	360	281	308	236
ENSG00000072778_ACADVL	2764	1789	3214	2081	2852	1010	2665	3341	3623	1892	3745	689	1908	922	1585	1920	1731	2542	1495	1232	2138	2087	1672	2560	1323	4986	3516	3972	1352	2055	4206	3592	3868	1372	1864	1267	1521	1695	3509	420	1380	1659	3066	1161	2320	1288	1259	1764	2305
ENSG00000072786_STK10	135	309	190	177	248	12	20	80	915	35	897	69	32	76	326	595	81	75	105	44	129	70	57	1008	17	4729	3906	1048	500	1025	1437	2966	547	57	48	142	76	368	105	48	147	77	368	98	123	270	43	66	49
ENSG00000072803_FBXW11	1301	567	397	246	935	501	844	732	1167	789	1689	900	897	1306	987	837	1648	942	342	435	1260	1132	413	995	459	861	838	958	1341	1130	1056	1000	1229	934	1189	939	1514	908	1235	465	1013	873	1184	1089	1492	1158	531	995	1097
ENSG00000072818_ACAP1	55	92	136	93	63	2	4	29	404	21	222	4	0	24	102	303	12	13	69	20	49	16	36	355	9	2132	1451	560	226	470	597	1178	269	6	3	28	6	187	10	0	73	35	139	20	48	69	1	7	4
ENSG00000072832_CRMP1	0	0	0	0	0	1	0	0	0	0	0	0	0	0	0	8	0	0	0	0	0	0	0	0	0	1	5	0	2	0	0	0	0	0	0	0	0	0	0	0	0	0	5	0	0	0	0	0	0
ENSG00000072840_EVC	0	0	1	0	0	6	3	0	2	0	0	0	0	0	0	0	0	0	0	14	0	2	0	0	0	44	9	0	2	2	6	21	5	0	0	0	0	0	11	0	0	0	0	0	0	0	9	0	0
ENSG00000072849_DERL2	98	119	74	67	95	279	96	52	259	132	226	69	109	90	110	104	136	142	122	100	127	124	103	159	79	296	210	167	144	138	201	234	174	153	257	179	195	187	152	95	92	107	177	131	118	164	26	143	154
ENSG00000072858_SIDT1	1338	422	371	145	625	218	314	314	1345	1138	1726	1108	428	1213	1238	563	1301	752	236	239	848	904	430	987	384	1162	699	798	998	643	835	1172	1127	787	936	894	820	768	1231	262	703	315	1189	890	977	1107	684	937	886
ENSG00000072864_NDE1	517	347	428	279	527	57	282	330	746	552	542	282	385	658	532	399	552	322	255	469	386	545	372	689	33	1659	2520	877	601	763	617	962	581	429	564	537	589	447	409	233	439	356	294	502	399	361	384	405	469
ENSG00000072952_MRVI1	1132	64	271	203	608	333	556	575	897	433	1006	571	584	1126	748	1098	462	954	356	482	515	1201	270	357	338	784	538	862	817	662	528	659	1219	980	769	816	1681	589	1077	297	730	422	612	730	786	888	526	871	729
ENSG00000072954_TMEM38A	0	0	0	0	0	2	0	0	0	0	0	0	0	0	0	0	0	0	0	0	0	2	0	1	0	4	3	0	0	3	0	5	0	0	0	0	0	0	0	0	0	0	0	0	5	0	0	0	2
ENSG00000072958_AP1M1	322	132	441	37	244	45	328	251	425	130	767	224	306	221	236	400	399	286	161	143	313	203	159	342	67	774	630	219	295	350	406	512	443	191	242	273	210	214	268	107	199	282	214	307	292	208	57	298	280
ENSG00000073008_PVR	3	2	0	0	0	26	0	1	2	0	0	0	0	0	0	0	0	0	0	0	0	0	1	3	0	4	27	2	3	15	0	7	1	0	0	0	0	4	0	0	0	0	2	0	0	1	5	2	0
ENSG00000073009_IKBKG	5030	4563	3589	2244	5487	3521	5160	4683	8864	4146	6255	4444	2958	2954	2511	2631	4970	3164	2602	2696	3450	3529	2322	2912	1413	2046	2538	3737	3125	3018	3846	3075	4570	3085	3096	4468	3862	2840	4478	2274	3671	2190	5530	5285	3766	3149	2089	3214	4016
ENSG00000073050_XRCC1	677	160	218	145	223	189	334	179	416	244	585	232	112	477	288	148	556	268	135	316	237	339	204	385	100	490	316	418	345	294	173	417	334	233	251	298	374	254	266	162	302	257	283	284	290	331	79	384	237
ENSG00000073060_SCARB1	19	45	0	0	0	25	0	1	11	0	27	2	22	3	9	1	7	0	13	0	6	12	0	12	2	23	130	10	7	34	17	28	16	2	10	0	0	4	6	22	0	0	3	1	3	31	29	35	0
ENSG00000073067_CYP2W1	0	0	0	0	0	1	0	2	0	0	0	0	0	0	0	0	0	0	0	0	0	0	0	0	0	0	0	0	0	0	0	0	0	0	0	0	0	0	0	0	0	0	0	0	0	0	0	0	0
ENSG00000073111_MCM2	90	42	44	93	142	75	25	139	280	84	158	62	23	41	53	150	137	64	66	49	78	46	125	187	50	165	160	132	66	88	101	157	43	55	87	176	36	74	61	25	110	84	376	60	112	103	68	65	57
ENSG00000073146_MOV10L1	0	0	0	0	0	2	0	0	0	0	0	24	0	15	0	0	3	6	0	0	9	0	0	1	0	3	0	7	0	1	6	0	5	0	9	0	5	0	2	0	9	0	0	6	6	9	1	7	0
ENSG00000073150_PANX2	0	0	1	0	0	2	0	2	0	0	0	0	0	1	0	2	0	0	2	0	0	0	0	0	0	6	37	11	2	2	1	0	3	0	0	2	0	0	0	0	0	2	0	0	4	0	1	0	0
ENSG00000073169_SELO	6	15	36	0	30	6	1	9	16	0	13	1	0	0	24	28	11	13	20	27	3	0	0	35	0	216	137	28	25	41	53	110	23	0	16	30	0	15	3	0	7	20	11	11	6	4	9	6	6
ENSG00000073282_TP63	16	12	72	27	4	17	33	11	15	1	1	13	7	7	10	4	17	24	0	13	12	12	2	3	0	5	5	6	4	12	4	15	7	5	15	17	12	4	6	39	12	14	23	10	36	11	1	8	13
ENSG00000073331_ALPK1	8	9	89	38	1	5	16	1	2	30	5	6	4	31	10	159	1	8	8	4	10	17	3	222	0	292	1906	708	80	142	79	20	110	2	3	45	31	34	28	11	24	0	1	18	16	61	17	12	12
ENSG00000073350_LLGL2	31	55	61	1	18	24	0	51	174	6	115	5	0	15	97	41	0	0	31	1	15	3	0	132	4	1201	272	75	69	153	365	750	82	0	0	7	5	76	2	0	20	0	50	11	16	13	4	0	0
ENSG00000073417_PDE8A	29	75	25	64	140	50	126	63	133	132	80	99	22	72	102	41	93	118	88	142	65	92	58	161	14	263	208	129	65	92	123	261	143	110	133	100	52	137	81	59	97	68	75	111	74	173	193	131	112
ENSG00000073464_CLCN4	1276	456	224	277	1317	270	329	649	2366	453	820	809	533	1041	787	748	955	703	311	652	619	687	329	529	426	468	542	678	1210	651	590	771	1329	1019	634	837	758	767	1172	530	1079	281	1308	832	1212	1015	470	804	822
ENSG00000073536_NLE1	4	0	0	0	0	8	0	1	1	0	0	0	17	0	0	0	0	0	0	0	5	0	0	10	0	55	29	7	12	7	4	46	3	0	0	2	0	1	0	0	1	4	12	1	0	3	0	0	0
ENSG00000073578_SDHA	12349	5136	4461	3790	9410	5558	6741	10882	11860	8961	17823	8603	5041	6498	8635	5339	12834	5020	4498	6893	8276	8578	5254	10828	4207	8590	6573	10457	7884	8134	10276	9844	5536	7068	9111	10541	10702	6526	8913	4640	8568	7971	7792	7506	8017	7867	5169	5923	7768
ENSG00000073584_SMARCE1	1455	630	768	586	869	217	544	553	1175	661	1253	746	727	1127	967	555	1300	1033	363	679	798	1016	669	1150	539	1679	1158	1020	1401	966	1032	1401	1230	1253	1213	854	1762	1311	986	837	874	748	1086	868	1097	935	357	1035	1134
ENSG00000073598_FNDC8	0	0	0	0	0	1	0	1	0	0	0	0	0	0	0	0	0	0	0	0	0	0	0	0	0	1	0	0	0	0	0	0	0	0	0	0	0	0	0	0	0	0	0	0	0	0	0	0	0
ENSG00000073605_GSDMB	1	26	0	6	12	6	7	47	100	12	116	11	11	3	16	25	27	34	19	15	20	8	0	83	0	480	219	66	65	148	177	309	42	19	13	158	10	31	14	1	22	50	40	28	23	18	24	9	5
ENSG00000073614_KDM5A	1700	809	802	748	1746	309	435	808	2710	1000	2770	1224	673	999	1434	1437	1616	897	451	585	1001	1155	559	2409	610	7309	5874	2531	1872	2694	3079	6018	1926	819	1458	1980	1592	1803	902	767	1237	698	1814	1122	1491	1403	611	1041	983
ENSG00000073670_ADAM11	1	0	0	0	0	3	0	0	0	0	0	2	0	0	0	0	0	1	0	0	0	0	0	0	0	2	1	8	0	1	0	0	2	0	0	0	0	2	2	0	5	0	0	2	0	4	0	1	0
ENSG00000073711_PPP2R3A	37	0	1	0	19	16	14	0	13	0	14	5	15	10	20	11	5	12	0	0	10	15	0	9	33	35	9	4	16	10	7	17	16	3	14	27	5	10	2	0	13	0	19	2	2	35	55	2	8
ENSG00000073712_FERMT2	13	1	18	7	2	63	7	17	58	11	15	3	5	13	52	73	30	11	34	6	38	55	30	88	41	16	11	15	17	10	33	16	31	50	35	18	92	21	29	2	12	26	15	17	48	18	42	22	60
ENSG00000073734_ABCB11	0	0	0	0	0	1	0	0	0	0	0	0	0	0	0	0	0	0	0	0	0	0	0	0	0	2	0	0	0	1	0	0	0	0	0	0	0	0	0	0	0	0	0	0	0	0	0	0	0
ENSG00000073737_DHRS9	0	0	6	54	0	4	1	1	0	0	0	0	0	0	0	9	0	0	75	0	0	0	0	31	0	41	319	61	6	18	16	1	21	0	2	0	0	4	0	4	1	0	0	1	0	18	0	0	0
ENSG00000073754_CD5L	0	0	0	0	0	1	0	0	0	8	0	0	0	0	0	0	0	1	0	0	0	0	0	0	0	2	0	0	0	0	0	0	0	0	0	0	0	0	0	0	0	0	0	0	0	0	0	0	0
ENSG00000073756_PTGS2	37	48	193	337	0	3	56	1	6	1	11	0	19	0	38	528	4	0	28	19	3	0	0	281	16	1431	8403	2807	203	544	621	41	173	13	7	34	0	12	0	0	19	0	6	6	15	25	18	17	0
ENSG00000073792_IGF2BP2	5674	1734	1763	771	5246	1046	2413	3340	6282	3620	6750	4003	2901	4880	3818	3644	4900	3950	1648	2228	3713	4542	1888	2473	2915	2249	3543	5125	5765	4705	3657	3198	4900	4517	5269	4017	4997	4019	5380	1830	3709	2970	4848	4127	4908	4548	2716	3809	4295
ENSG00000073803_MAP3K13	4	11	0	0	0	15	4	1	27	6	24	11	6	8	1	8	18	27	9	1	12	20	0	5	0	21	38	19	7	10	14	12	12	7	15	10	13	8	3	3	5	0	20	3	5	12	2	16	3
ENSG00000073849_ST6GAL1	2292	1092	1169	734	2587	1172	1846	1895	3623	2051	3417	2574	2163	1604	2062	1560	2205	2009	846	716	2039	1940	1160	1561	1291	2055	1181	3252	1826	2064	2007	1549	2820	2803	2638	2821	3340	2631	1477	756	1898	2156	3709	1874	1303	2530	1434	2466	2049
ENSG00000073861_TBX21	47	95	36	25	158	1	11	8	584	14	262	1	5	3	130	158	2	0	22	9	49	1	32	389	43	2652	650	151	92	418	665	1445	213	3	2	29	12	161	2	14	68	6	167	17	33	49	2	6	0
ENSG00000073905_VDAC1P1	0	0	1	1	0	7	0	1	0	0	0	0	0	0	0	0	0	0	0	0	1	0	2	0	0	0	0	0	0	5	0	0	0	0	2	0	0	1	0	0	0	0	1	0	0	1	0	0	0
ENSG00000073910_FRY	176	326	230	453	376	231	206	221	663	533	357	190	181	276	310	868	201	317	156	200	360	262	178	931	250	3177	6269	2486	493	768	753	1581	711	291	443	310	302	540	427	221	397	242	332	244	457	463	373	454	298
ENSG00000073921_PICALM	5962	4280	4047	3226	5757	3139	3013	2504	10271	7607	7873	7869	4799	7748	7736	7168	8001	7805	3288	3332	8776	7741	3370	8784	2990	10279	18174	12044	8211	7940	9845	10609	9194	10921	12691	10852	9346	13347	8518	3422	7156	6751	9439	6739	9861	11592	5426	10535	9657
ENSG00000073969_NSF	311	418	1000	211	284	50	279	199	733	438	676	152	285	284	162	419	526	300	236	288	258	363	409	480	134	1638	1241	462	625	743	484	1348	681	311	477	317	336	501	532	312	536	364	469	467	416	336	268	419	282
ENSG00000074047_GLI2	0	0	0	0	0	5	1	1	1	0	0	0	0	0	0	0	0	0	0	0	0	0	0	0	0	0	0	0	0	0	0	0	0	0	0	0	0	0	0	0	0	0	0	0	0	0	0	0	0
ENSG00000074054_CLASP1	2784	897	1297	788	1734	584	985	1177	2318	1355	3903	1292	1116	1689	1903	1880	3052	1276	926	1402	1505	2261	942	1784	536	3501	2565	2202	2297	2358	1972	2670	2151	1404	2435	2072	1769	1807	1349	788	1754	1571	1570	1596	1630	1551	893	1598	1231
ENSG00000074071_MRPS34	42	17	9	7	23	48	32	19	63	27	85	18	25	29	65	62	105	18	17	30	54	25	73	61	12	131	117	27	70	65	86	118	69	58	34	42	23	51	64	21	26	69	68	57	44	40	35	45	60
ENSG00000074181_NOTCH3	0	34	3	9	0	16	0	10	11	0	0	28	0	4	1	21	40	10	0	0	3	1	0	4	0	5	16	8	8	4	0	10	2	8	4	7	13	4	11	0	4	2	8	5	10	2	40	6	1
ENSG00000074201_CLNS1A	698	759	490	500	688	854	564	379	966	1272	710	1031	720	1060	1102	817	1060	1093	895	722	933	1182	959	1238	421	1147	1078	1080	1220	1050	887	1202	951	1656	1901	1944	1190	2348	1127	550	967	1064	1174	861	1613	1828	993	1271	905
ENSG00000074211_PPP2R2C	0	0	0	0	0	11	0	1	0	0	0	0	0	0	0	0	0	0	0	0	0	0	0	0	0	0	0	0	0	0	0	0	0	0	0	0	0	0	2	0	0	0	0	0	0	0	0	1	0
ENSG00000074219_TEAD2	0	0	0	0	0	15	1	0	4	0	0	0	0	0	0	0	0	0	0	0	2	0	0	0	0	0	0	0	0	0	0	0	0	0	0	0	10	0	0	0	0	0	0	0	0	0	9	0	0
ENSG00000074266_EED	200	279	53	176	94	43	142	94	288	306	261	186	107	217	188	135	198	198	160	82	241	173	172	383	147	473	368	140	115	261	253	406	247	296	356	223	354	327	263	88	290	275	139	161	280	427	189	274	217
ENSG00000074276_CDHR2	0	0	0	0	5	1	0	2	0	0	0	0	0	0	1	1	0	0	0	0	0	0	0	6	0	5	6	0	0	0	0	1	1	0	0	0	0	0	0	0	0	0	5	0	0	2	0	0	0
ENSG00000074317_SNCB	0	0	0	0	0	0	0	0	0	0	0	0	0	0	0	0	0	0	0	0	0	0	0	0	0	0	0	0	0	0	0	0	0	0	0	0	0	0	0	0	0	0	0	0	0	0	0	0	0
ENSG00000074319_TSG101	917	396	527	210	685	450	358	533	911	486	994	735	366	686	586	627	938	569	415	381	754	847	237	1059	229	1195	1324	850	997	757	786	862	1058	746	496	632	1238	830	625	477	730	411	945	585	471	719	279	797	657
ENSG00000074356_C17orf85	369	251	442	188	353	92	78	451	568	206	643	191	260	198	241	332	586	243	164	212	256	331	222	372	164	967	885	361	430	460	435	728	438	303	268	278	337	223	425	126	266	212	376	260	402	492	332	249	385
ENSG00000074370_ATP2A3	24332	9015	8548	2955	23572	5337	10098	24350	34390	15710	34417	21307	17706	18136	19216	16969	32883	22796	9502	8897	19297	24880	7149	11802	9009	10737	9570	21021	28860	20190	17399	14113	29520	14188	15110	17545	18007	13278	24394	7515	21942	13754	27297	25947	20892	16601	9683	22902	20404
ENSG00000074410_CA12	0	3	0	0	0	6	0	0	0	0	0	0	1	0	0	2	0	0	0	0	0	6	0	0	73	0	2	0	0	1	0	0	0	0	0	0	0	0	0	0	0	0	0	0	0	0	39	0	0
ENSG00000074416_MGLL	9714	3649	2829	2016	8081	2801	3275	6553	10591	6189	11954	6476	4214	8892	5996	7363	9725	7327	3169	4180	6107	8529	3632	3386	4377	4012	2840	6660	9097	4417	3619	3625	8964	5434	6659	7017	7920	7692	6693	2351	7111	7410	7386	8957	9257	6628	4744	7449	8836
ENSG00000074527_NTN4	0	0	0	0	10	1	2	0	1	0	0	0	0	0	1	0	0	0	0	0	0	3	0	1	0	13	0	0	0	4	0	62	3	0	0	0	0	0	0	0	0	0	0	0	0	0	0	0	0
ENSG00000074582_BCS1L	0	0	2	3	0	25	0	0	65	0	13	2	0	0	17	19	11	5	0	7	8	3	0	31	0	193	133	31	29	52	103	158	21	0	21	0	31	2	5	1	11	9	9	10	2	3	12	2	6
ENSG00000074590_NUAK1	0	0	1	1	0	7	2	1	2	0	9	1	0	0	0	0	0	1	0	0	1	0	0	4	1	40	3	5	3	8	17	5	6	0	0	3	0	17	0	0	3	0	0	0	0	3	11	1	0
ENSG00000074603_DPP8	943	488	546	596	771	277	562	423	1239	522	1111	615	577	770	943	722	865	658	292	182	770	815	247	796	293	1334	1176	834	1043	964	1121	1222	1008	684	1024	811	929	865	978	323	729	354	806	983	995	884	470	1068	764
ENSG00000074621_SLC24A1	63	2	96	13	38	3	249	1	109	10	61	21	25	40	28	144	25	58	0	6	29	24	3	124	0	401	298	117	56	167	51	249	49	26	25	54	36	35	19	0	15	24	30	21	48	25	0	27	37
ENSG00000074657_ZNF532	11	5	59	2	0	11	3	7	37	0	26	0	0	0	0	18	0	0	0	1	7	3	0	25	0	113	67	11	13	46	31	218	26	0	0	13	0	16	1	0	0	0	3	3	3	0	24	1	3
ENSG00000074660_SCARF1	128	96	108	76	118	84	43	100	223	206	128	152	199	209	180	122	192	94	97	280	156	201	118	177	70	147	378	286	180	174	188	178	185	184	227	280	198	115	221	125	170	172	230	319	238	183	210	153	166
ENSG00000074695_LMAN1	1038	1583	593	309	1644	300	742	857	2067	1060	1991	1096	871	658	1204	1516	1314	863	314	412	1179	1334	435	1184	492	1424	963	982	1284	1902	1393	1633	1749	1512	1075	1237	1464	890	1520	632	981	545	1348	1320	1293	1069	523	1514	1125
ENSG00000074696_PTPLAD1	0	0	0	0	0	32	47	23	9	21	24	3	0	9	0	7	0	0	6	0	9	25	0	26	12	89	47	6	8	17	50	86	162	5	12	0	3	6	1	0	2	3	4	108	8	6	5	93	0
ENSG00000074706_IPCEF1	1206	258	423	479	770	171	316	535	867	537	1061	749	697	818	911	682	991	684	284	505	955	1097	572	832	210	831	842	1283	609	498	983	1336	801	869	1973	1448	1049	1193	822	245	1370	628	815	817	1007	1251	749	948	1095
ENSG00000074755_ZZEF1	3731	1447	1171	1019	3960	747	1210	2705	4466	3275	6661	3601	1917	2133	3549	2951	4461	1892	919	1183	2651	3406	1039	3525	2541	5475	5341	4475	3564	4078	3772	4988	3317	2708	3414	3725	2546	3467	3175	934	2834	1984	3950	2588	2867	3220	2014	2363	3066
ENSG00000074771_NOX3	0	0	0	0	0	1	0	0	0	0	0	0	0	0	0	0	0	0	0	0	0	0	0	0	0	0	0	0	0	0	0	0	0	0	0	0	0	0	0	0	0	0	0	0	0	0	0	0	0
ENSG00000074800_ENO1	14574	12332	10309	5533	15533	8958	10440	7346	18652	7716	25502	9528	9727	10583	11628	12761	19840	12808	10485	8829	13878	13158	8235	11558	7901	10355	10322	11663	17841	15808	16223	10684	17000	15563	12563	14537	13948	9882	21592	6908	12899	14120	17111	13769	17545	12166	5543	13626	10634
ENSG00000074803_SLC12A1	0	0	0	7	0	0	0	0	0	0	0	0	0	0	0	0	0	0	0	0	0	0	0	34	0	0	200	0	0	40	0	0	0	0	0	0	0	0	0	0	0	0	0	0	0	2	0	0	0
ENSG00000074842_C19orf10	5	12	0	1	1	40	1	1	43	22	46	0	0	13	32	12	19	1	11	6	6	13	9	51	5	202	97	41	23	79	89	175	26	0	0	7	12	8	0	6	10	0	18	23	6	20	17	12	1
ENSG00000074855_ANO8	32	34	12	0	13	29	32	33	114	24	123	17	7	9	36	40	50	27	8	2	21	12	27	43	0	280	79	68	66	53	39	140	44	27	31	106	24	15	31	14	37	10	48	39	13	38	22	23	15
ENSG00000074935_TUBE1	2	42	0	0	0	33	0	0	5	0	17	0	0	1	34	3	0	1	0	0	2	5	0	8	0	97	43	18	8	22	15	54	10	0	10	1	2	19	0	0	6	4	11	2	13	13	20	0	4
ENSG00000074964_ARHGEF10L	0	0	3	0	0	2	3	3	0	0	4	9	0	0	0	4	0	0	2	0	1	0	0	52	0	3	44	13	12	32	28	22	0	1	0	0	0	0	0	0	0	0	3	0	0	4	12	0	0
ENSG00000074966_TXK	253	320	98	169	450	154	122	99	725	206	729	175	168	381	404	200	221	217	103	40	318	206	126	1087	178	2845	1617	507	337	760	920	2459	322	323	302	269	342	595	211	144	356	316	494	234	326	274	201	294	254
ENSG00000075035_WSCD2	0	0	0	0	0	2	0	2	0	0	0	0	0	0	10	0	0	0	0	0	0	0	0	0	0	3	0	0	0	0	0	1	0	0	0	0	0	0	0	0	0	0	0	0	0	0	0	0	0
ENSG00000075043_KCNQ2	0	0	0	0	0	11	0	4	0	0	0	0	0	0	0	0	0	0	0	0	0	1	0	0	0	0	0	0	0	0	0	0	0	0	0	0	0	0	0	0	0	0	0	0	0	0	0	0	0
ENSG00000075073_TACR2	0	0	0	0	0	2	0	1	0	0	0	0	0	0	0	0	0	0	0	0	0	0	0	0	0	0	4	0	0	2	0	1	1	0	0	0	0	0	4	0	0	0	0	0	0	0	0	0	0
ENSG00000075089_ACTR6	107	157	136	227	98	177	84	31	276	113	184	149	76	163	133	96	182	117	22	125	123	166	81	214	42	426	250	89	204	140	152	230	164	204	176	167	142	161	206	93	118	132	131	145	163	169	68	111	145
ENSG00000075131_TIPIN	37	80	30	13	55	13	94	0	59	54	59	29	51	26	27	19	58	59	25	7	49	31	1	52	0	91	84	38	38	46	73	86	32	69	107	46	34	68	55	18	35	16	55	35	95	71	55	63	22
ENSG00000075142_SRI	224	297	151	97	198	45	220	88	401	67	250	73	55	165	20	154	127	115	152	35	87	103	170	237	68	1342	650	238	158	317	392	656	253	121	89	194	167	162	204	74	166	35	121	66	145	161	101	78	126
ENSG00000075151_EIF4G3	14768	7643	6746	3893	13969	5158	6742	9779	20841	13876	19728	12993	8290	19096	15889	15783	15761	16047	6261	7191	15527	16965	4958	13200	5753	10762	7858	14186	17214	14166	12888	12771	21456	18819	19170	15934	22137	18554	18098	6067	13584	10838	16281	17676	17184	18842	10797	15041	17874
ENSG00000075188_NUP37	27	1	0	6	0	6	0	0	36	2	40	4	29	0	5	34	23	16	0	57	17	20	0	46	28	156	96	34	24	55	64	120	24	29	20	45	2	30	11	17	13	49	34	11	32	24	32	14	33
ENSG00000075213_SEMA3A	2	0	1	0	0	3	0	0	0	0	0	0	0	1	3	0	0	0	0	0	0	7	0	2	0	0	0	0	6	0	7	0	0	0	0	0	0	0	0	0	0	0	0	0	0	0	0	0	0
ENSG00000075218_GTSE1	8	0	1	11	4	3	1	1	9	0	13	2	5	9	7	0	2	5	0	1	1	0	0	14	0	11	4	5	3	14	1	8	3	12	6	3	0	0	2	0	5	0	2	2	2	0	0	4	11
ENSG00000075223_SEMA3C	27	2	1	33	0	1	1	0	43	0	12	22	0	21	46	88	4	3	0	8	52	13	2	21	9	34	95	48	92	34	3	44	44	4	3	0	4	15	9	2	5	6	22	14	19	10	91	26	82
ENSG00000075234_TTC38	60	45	134	89	43	13	64	6	285	25	219	4	2	31	119	66	11	12	21	18	43	0	8	290	0	1439	348	59	116	255	571	929	165	14	9	36	20	110	18	4	44	13	64	16	60	37	6	12	7
ENSG00000075239_ACAT1	2	122	195	62	72	44	7	1	43	2	61	1	14	8	79	63	4	18	0	19	15	26	23	82	0	241	167	71	41	106	98	158	38	25	17	26	58	33	12	25	23	24	37	17	47	7	36	28	17
ENSG00000075240_GRAMD4	8	87	101	1	5	7	0	10	59	0	51	26	0	6	28	18	0	10	0	0	0	1	0	56	14	456	301	54	34	72	55	251	33	0	0	0	0	13	2	0	15	0	22	2	8	25	0	5	0
ENSG00000075275_CELSR1	2	19	4	1	1	12	4	5	5	0	13	0	0	0	0	6	0	1	0	0	0	0	0	13	6	38	60	4	4	9	0	18	0	0	0	0	0	0	0	0	0	3	1	15	2	2	28	0	0
ENSG00000075290_WNT8B	0	0	0	0	0	1	0	1	3	0	0	0	0	0	0	0	0	0	0	0	0	0	0	0	0	2	0	0	0	0	0	1	0	0	0	0	0	0	0	0	0	0	0	0	0	0	0	0	0
ENSG00000075292_ZNF638	1177	961	1099	444	1132	453	565	644	2255	1701	1911	1419	1141	1329	1700	1312	1242	1678	530	665	1450	1596	436	2162	830	3575	3902	2096	1640	1916	2072	3629	1940	2187	2895	2224	1871	2651	1885	619	1677	1007	1912	1463	2041	2227	1095	1913	1487
ENSG00000075303_SLC25A40	183	162	1	34	51	40	111	48	138	27	174	79	161	124	86	92	167	153	61	24	149	90	29	100	75	192	165	133	107	138	133	256	199	110	131	100	221	76	123	27	134	104	122	126	144	216	79	77	173
ENSG00000075336_TIMM21	0	12	0	0	0	1	33	0	16	0	23	0	0	18	8	11	6	15	0	18	4	6	29	23	0	90	47	23	16	19	15	60	12	0	0	0	19	7	0	0	3	0	14	0	0	10	0	5	2
ENSG00000075340_ADD2	12	0	0	0	0	0	0	0	0	12	0	0	0	0	0	21	0	0	0	0	1	1	2	4	0	12	58	3	21	6	24	5	1	2	0	3	0	0	1	0	3	15	1	0	0	5	0	0	0
ENSG00000075388_FGF4	0	0	0	0	0	0	0	0	0	0	0	0	0	0	0	0	0	0	0	0	0	0	0	0	0	0	0	0	0	0	0	0	0	0	0	0	0	0	0	0	0	0	0	0	0	0	0	0	0
ENSG00000075391_RASAL2	133	2	0	7	38	20	28	52	166	93	113	17	42	43	77	77	87	50	35	46	40	102	0	124	43	53	49	116	60	53	97	39	70	69	123	54	118	97	101	43	50	103	134	57	31	90	39	61	70
ENSG00000075399_VPS9D1	197	55	52	38	115	25	61	144	112	33	173	70	89	115	131	162	174	70	99	69	96	95	30	63	84	160	140	115	143	92	101	102	125	76	83	119	85	71	109	36	91	67	101	99	88	106	38	100	99
ENSG00000075407_ZNF37A	38	1	1	11	0	2	15	6	23	41	108	8	35	36	51	61	32	65	2	2	34	38	0	80	0	142	110	53	49	76	61	177	41	24	29	30	43	51	19	5	37	45	30	11	58	39	18	29	22
ENSG00000075413_MARK3	1317	1186	504	524	1983	615	727	709	1840	1028	2654	1634	753	956	1327	1688	1622	1113	782	589	1257	1436	685	1948	942	2325	3472	2445	1846	1683	1308	2117	1567	1053	1506	1505	1221	1426	1410	795	1991	790	1631	1028	1349	1660	855	1421	1197
ENSG00000075415_SLC25A3	2070	1286	1025	1030	1742	993	1358	1007	1864	753	2993	1170	1229	1206	1349	1134	2013	1245	873	652	1559	1216	754	2049	963	3777	2855	1941	1644	1627	2153	2958	1687	973	1016	1479	1196	953	1988	836	1429	903	1679	1045	1545	1653	544	1351	1181
ENSG00000075420_FNDC3B	292	102	251	519	312	211	148	111	884	141	423	190	130	134	370	658	71	156	162	92	247	125	65	1030	31	3045	3586	1180	372	851	745	1895	510	217	268	144	117	310	155	80	199	193	348	109	163	281	268	119	210
ENSG00000075426_FOSL2	46	44	44	1	39	50	1	7	283	0	93	1	0	5	14	192	8	5	31	10	23	8	0	151	3	1200	872	265	89	240	226	517	98	3	1	30	19	104	4	0	20	2	21	3	47	50	8	0	0
ENSG00000075429_CACNG5	0	0	0	0	0	1	0	1	0	0	0	0	0	0	0	0	0	0	0	0	0	0	0	0	0	0	0	0	0	0	0	0	0	0	0	0	0	0	0	0	0	0	0	0	0	0	0	0	0
ENSG00000075461_CACNG4	0	0	0	0	0	1	0	4	0	0	0	0	0	0	0	0	0	0	0	0	0	0	0	0	0	9	0	1	0	0	0	5	0	0	0	0	0	0	0	0	0	0	0	0	0	0	17	0	0
ENSG00000075539_FRYL	1132	709	611	527	882	341	576	641	2246	1065	2496	795	649	1125	1253	1134	1217	776	171	369	1164	983	244	1673	535	4771	3515	1835	1613	1973	2291	4284	2181	1080	1061	1601	1582	1292	1443	475	1126	482	1554	717	1260	1881	724	1046	1141
ENSG00000075568_TMEM131	253	146	172	121	248	4	145	94	481	189	347	156	178	209	262	374	288	229	67	115	202	155	81	400	43	1505	1269	426	371	467	501	1083	318	223	254	220	271	448	150	51	248	102	391	120	248	271	196	212	188
ENSG00000075618_FSCN1	3	1	2	0	0	77	0	0	8	0	5	2	1	0	0	1	0	0	0	0	0	10	0	6	0	0	20	3	5	3	14	5	4	0	2	0	5	0	1	0	0	1	0	4	9	0	29	1	7
ENSG00000075624_ACTB	2070669	1128338	945291	449718	1918433	877342	1176406	1405536	3050105	1425012	2019407	1756160	1439707	1705305	1292984	1738783	1778866	1878586	1087523	1025086	1889120	1808297	783265	1050581	950431	903999	815792	1330647	1397367	1373667	1316353	1161614	1961265	1634244	1372146	1360137	1860536	1247498	2591407	861295	1242101	1127173	2107086	1662561	1711017	1817160	888829	2332912	1850334
ENSG00000075643_MOCOS	0	1	0	0	0	2	0	1	3	0	0	0	0	0	0	0	0	0	0	0	6	8	0	2	12	0	0	0	1	0	0	0	0	0	0	0	0	0	0	0	1	0	0	0	0	0	0	0	0
ENSG00000075651_PLD1	10	118	85	39	38	31	3	0	44	17	57	0	29	13	46	98	6	7	2	0	21	18	19	94	0	303	357	76	17	98	135	285	24	8	5	19	18	21	18	35	7	22	46	11	6	21	0	10	17
ENSG00000075673_ATP12A	0	0	0	0	0	0	0	0	0	0	0	0	0	0	0	0	0	0	0	0	0	0	0	0	0	0	0	0	0	0	0	0	0	0	0	0	0	0	0	0	0	0	0	0	0	0	0	0	7
ENSG00000075702_WDR62	5	0	1	0	0	37	8	6	40	13	9	14	0	3	13	2	10	0	0	0	8	11	0	29	0	54	72	32	26	17	73	70	7	4	9	16	47	12	2	1	4	0	0	2	7	12	84	8	13
ENSG00000075711_DLG1	2336	2095	1370	892	2346	1256	1664	1278	3037	1906	3770	2224	2299	2595	2306	2421	3675	1933	1043	978	2522	2273	1053	2951	1280	2372	2481	3112	3074	3092	2567	3025	3403	2651	2809	2747	2145	2740	3115	1114	2598	1375	3966	2662	4087	2769	1299	2974	2581
ENSG00000075785_RAB7A	3825	2724	1440	1392	3576	1511	2256	2403	4594	2394	5358	2655	2248	2822	2960	2657	4429	2533	1812	2160	3209	2875	1525	3529	1509	3164	3972	3368	3119	3063	3000	3104	3339	2907	3216	3385	3618	3303	3634	1901	3089	2494	3382	3174	3296	3319	1679	3335	3212
ENSG00000075790_BCAP29	700	469	358	239	495	192	513	429	909	318	651	382	791	1181	441	257	856	824	228	239	546	668	94	402	302	555	272	498	964	706	442	483	1200	930	380	463	1096	520	1071	353	545	128	445	566	687	767	169	655	784
ENSG00000075826_SEC31B	34	18	85	2	31	7	1	5	65	0	61	3	3	5	13	75	9	3	22	5	10	4	0	70	0	889	312	105	44	123	149	325	50	4	0	11	4	18	0	0	7	10	31	8	17	13	0	11	1
ENSG00000075856_SART3	1068	262	607	119	513	225	147	601	494	682	1426	509	299	374	702	517	1093	212	204	389	331	381	160	717	297	1606	1142	446	587	774	1120	1563	372	208	276	630	325	484	527	119	600	339	568	580	559	404	225	409	276
ENSG00000075884_ARHGAP15	311	248	356	187	188	187	337	155	738	450	335	345	221	297	389	384	263	437	295	164	372	265	132	740	109	2137	2814	1084	578	715	863	1553	520	459	641	521	421	656	350	84	379	259	433	236	548	654	332	394	304
ENSG00000075886_TUBA3D	0	15	0	0	0	1	0	1	0	0	1	0	0	0	0	0	0	0	0	0	0	0	0	0	0	11	7	0	0	0	4	18	2	0	0	0	0	0	0	0	0	0	0	0	0	0	0	0	0
ENSG00000075891_PAX2	0	0	0	0	0	4	0	0	0	0	0	0	0	0	0	0	0	0	0	0	0	0	0	0	0	0	0	0	0	0	0	0	0	0	0	0	0	0	0	0	0	0	0	0	0	0	0	0	0
ENSG00000075914_EXOSC7	3	0	1	0	0	8	11	0	21	0	0	0	25	10	18	5	0	8	13	0	5	15	0	32	0	179	87	21	24	25	98	80	11	0	0	9	7	0	1	0	0	0	7	1	13	9	0	0	0
ENSG00000075945_KIFAP3	6346	3046	2800	3200	5961	1923	3853	3562	5799	6729	12667	4265	2884	5737	6466	5579	10190	6061	2187	1941	9195	7574	1941	6806	4398	3741	5492	6405	9437	4843	4812	6016	6000	5341	6692	6365	6269	4250	5809	2580	5644	4231	7660	6284	4290	6483	3469	6828	5770
ENSG00000075975_MKRN2	34	68	19	21	3	25	0	29	31	10	22	17	3	20	16	5	18	15	11	0	14	8	2	32	19	254	117	50	16	43	59	175	31	4	20	11	4	13	21	10	30	9	28	16	14	23	8	10	12
ENSG00000076003_MCM6	3755	2428	978	1013	3615	998	2007	2646	3464	3316	6266	2916	1137	1286	2877	2738	4295	1530	1196	1230	1867	2598	1815	3798	1498	1618	2303	5134	2653	2076	2657	3568	2115	2584	4525	4167	2520	1459	2793	2089	2069	1438	4603	2472	2505	3133	1752	1631	1885
ENSG00000076043_REXO2	255	307	145	246	362	242	284	222	265	74	502	164	217	191	304	200	406	216	159	198	309	187	91	299	348	263	312	301	261	289	221	246	266	242	174	170	230	199	421	177	242	238	224	162	304	297	71	193	136
ENSG00000076053_RBM7	313	35	35	152	76	30	209	49	167	60	513	100	109	196	145	76	113	144	33	59	71	146	93	153	150	327	347	195	150	96	168	305	171	188	115	76	151	82	229	124	197	83	115	49	110	146	49	86	188
ENSG00000076067_RBMS2	7	0	88	0	31	39	0	24	26	73	7	48	74	9	99	28	31	20	34	25	17	40	91	51	117	72	15	36	64	50	17	51	57	36	21	54	79	48	33	10	24	91	35	23	17	38	38	30	14
ENSG00000076108_BAZ2A	1940	603	452	633	1893	610	641	1223	2509	998	3589	1620	1517	1416	2039	2362	2966	1423	421	700	1377	1654	390	2077	829	6162	6186	3469	2500	3272	2774	3693	2575	883	1571	1742	1638	1305	1444	618	1427	1078	2060	1454	1544	1356	706	1479	1692
ENSG00000076201_PTPN23	72	72	44	2	171	18	48	38	237	53	188	41	24	38	54	70	77	56	41	27	55	59	23	92	36	499	300	114	105	153	212	341	99	29	56	80	38	60	57	8	42	65	115	41	57	37	65	60	82
ENSG00000076242_MLH1	220	99	528	79	129	5	246	73	345	150	139	125	71	181	62	156	231	109	314	108	193	141	70	270	201	882	526	218	302	302	276	651	234	164	161	191	176	198	201	252	181	140	322	161	250	208	106	164	199
ENSG00000076248_UNG	14	61	28	0	0	24	0	0	48	7	90	8	27	39	16	0	19	36	0	15	48	32	8	30	13	309	130	23	26	37	83	125	15	18	12	9	11	30	4	26	29	53	5	0	37	15	12	8	0
ENSG00000076258_FMO4	0	0	0	1	0	0	0	1	24	0	20	0	0	0	12	0	2	14	0	2	2	0	0	12	0	49	16	10	5	10	13	22	0	1	0	0	1	19	0	0	0	0	0	0	0	0	0	2	2
ENSG00000076321_KLHL20	98	9	1	11	43	3	0	2	178	79	188	88	1	43	109	86	45	52	34	6	36	40	104	109	0	403	254	97	89	133	209	404	108	81	23	86	88	70	45	41	43	28	64	31	62	60	20	29	59
ENSG00000076344_RGS11	0	0	0	0	0	2	0	2	0	0	0	0	0	0	0	0	0	0	0	0	0	0	0	0	0	0	5	0	0	0	0	0	0	0	1	0	0	0	0	0	0	0	0	0	0	0	0	0	0
ENSG00000076351_SLC46A1	0	0	0	0	0	9	1	1	15	0	0	0	0	0	7	0	0	0	0	0	0	0	0	3	0	48	20	3	0	6	12	13	3	0	0	0	0	0	0	0	0	0	5	0	0	0	1	0	0
ENSG00000076356_PLXNA2	83	37	103	39	274	159	4	171	229	190	207	234	120	78	157	240	83	113	36	99	131	147	175	215	4	116	312	303	353	232	134	128	171	179	164	291	115	197	150	125	97	141	165	152	145	167	76	119	186
ENSG00000076382_SPAG5	111	74	2	60	80	29	72	103	107	83	172	81	63	87	87	111	91	60	0	48	48	58	69	65	48	151	206	199	152	108	164	186	112	62	112	70	36	89	57	56	68	81	37	94	120	36	46	64	49
ENSG00000076513_ANKRD13A	1404	509	772	549	1365	579	418	970	1861	589	1854	1030	568	994	972	1014	1332	948	521	518	1042	1077	363	1414	548	1905	3318	1624	1514	1618	1194	1561	1413	1143	1218	984	1265	1351	1337	433	960	756	1476	1312	1209	1093	777	1221	1065
ENSG00000076554_TPD52	9	20	45	18	0	3	34	25	38	0	29	7	1	0	10	0	0	5	0	0	0	2	9	28	0	178	56	17	9	9	15	88	21	7	6	10	0	16	4	16	11	0	24	3	12	5	3	3	0
ENSG00000076555_ACACB	12	7	2	19	21	10	1	23	95	28	57	40	6	66	43	63	75	35	0	26	43	43	17	70	0	203	95	69	92	55	91	151	67	30	32	42	63	38	48	6	38	3	37	33	89	46	30	35	9
ENSG00000076604_TRAF4	0	0	51	1	0	33	0	1	19	0	7	0	1	0	0	0	0	0	0	0	1	4	0	17	21	99	73	10	11	14	18	57	8	0	1	11	0	0	4	0	0	0	1	2	0	1	4	2	0
ENSG00000076641_PAG1	195	97	0	21	176	16	6	149	262	136	179	122	35	72	205	94	152	93	123	69	82	127	87	180	115	312	294	234	163	215	218	373	92	93	128	96	238	93	63	35	119	60	125	70	125	161	68	46	107
ENSG00000076650_GPATCH1	43	38	20	16	49	67	5	1	120	58	97	27	10	53	51	154	24	43	38	7	60	34	29	134	59	382	202	106	68	120	97	331	70	64	105	92	54	92	44	7	52	37	83	42	49	66	65	101	51
ENSG00000076662_ICAM3	53	198	607	519	55	34	56	16	223	34	179	2	7	21	132	597	55	16	420	47	37	14	42	654	19	2258	4794	1545	224	511	676	848	328	16	18	99	24	129	18	42	48	22	71	23	108	142	41	12	15
ENSG00000076685_NT5C2	1766	1269	573	860	1555	193	885	1006	1803	1170	2552	1434	1069	949	1187	1408	1746	1422	665	504	1013	1416	500	894	1041	1489	2985	1962	2079	1500	1122	1230	1697	1116	1294	1205	1227	1145	1422	952	1014	1364	1932	1013	1407	1296	368	937	1311
ENSG00000076706_MCAM	0	1	0	9	0	4	0	3	1	0	5	0	5	0	0	1	0	0	0	3	0	9	0	2	0	1	4	1	0	4	2	0	1	0	0	0	0	0	0	0	0	0	0	0	0	0	13	0	0
ENSG00000076716_GPC4	0	0	0	0	0	7	0	0	0	0	0	0	0	0	0	0	0	0	0	0	0	5	0	0	0	9	2	10	2	0	0	0	1	0	0	0	0	0	0	0	0	17	1	0	0	0	0	6	0
ENSG00000076770_MBNL3	2087	1514	1611	818	2346	1133	1138	1266	3783	1458	2601	1901	2481	2534	1920	3383	2341	1817	1547	736	2622	2576	1165	1555	2138	1479	3367	2645	2551	2587	2126	1948	2540	2182	2863	1884	1896	2253	2167	985	2305	1471	2355	2276	2507	2498	1281	3023	2605
ENSG00000076826_CAMSAP3	1	0	1	0	0	6	0	3	0	0	0	0	0	1	0	0	0	0	0	0	1	0	0	3	0	0	0	0	1	0	0	0	0	0	0	0	0	0	0	0	0	0	0	0	0	4	13	0	0
ENSG00000076864_RAP1GAP	3	0	1	0	0	23	0	2	2	0	48	0	0	0	0	153	0	6	33	0	0	3	0	1	56	19	305	71	301	0	0	11	0	2	0	28	0	0	0	0	0	0	18	0	0	0	1	9	0
ENSG00000076924_XAB2	70	62	186	83	112	53	47	113	253	48	338	44	61	74	94	115	129	54	152	143	80	115	53	244	44	798	479	262	185	222	331	451	136	51	96	161	148	146	139	47	109	122	211	100	133	140	119	62	102
ENSG00000076928_ARHGEF1	127	320	536	242	198	27	9	20	1280	34	645	24	56	35	392	619	54	39	155	38	166	8	36	1069	10	6731	4326	1292	653	1404	1756	3690	650	21	17	120	50	497	55	30	193	26	378	68	167	164	27	29	34
ENSG00000076944_STXBP2	21399	10867	10197	7760	19434	9895	13381	15601	24392	15521	28475	15713	15019	14759	17904	12262	23125	13095	13398	15570	16144	15679	17082	17426	10038	11811	12523	17812	17010	14457	15529	13152	16015	13603	18408	19671	17057	14642	20022	12183	15035	18608	19084	16334	17794	16376	8953	16411	15045
ENSG00000076984_MAP2K7	21	11	0	0	20	33	11	0	98	21	81	14	5	3	35	76	17	28	58	20	17	15	15	71	63	263	240	70	60	82	103	141	39	28	25	20	27	47	19	17	12	44	44	25	38	30	9	23	14
ENSG00000077009_NMRK2	0	0	0	0	0	0	0	0	1	0	0	0	0	0	0	0	0	0	0	0	0	0	0	0	0	0	0	0	0	0	0	0	0	0	0	0	0	0	0	0	0	0	0	0	0	0	0	0	0
ENSG00000077044_DGKD	8314	1816	1797	968	4738	1636	2537	4504	8184	3634	8547	4016	3263	4362	4809	4006	7176	3802	1814	1391	4778	5685	995	3010	2689	4396	3102	4379	7347	4790	4587	4230	6451	3345	5724	3903	5989	4543	5965	1583	4836	2859	3530	4853	6081	5046	2313	4715	4125
ENSG00000077063_CTTNBP2	0	1	0	2	0	4	0	0	0	0	0	0	0	1	0	0	0	0	0	5	0	0	0	0	0	0	0	0	0	0	0	0	0	0	0	0	0	0	0	0	0	0	0	0	0	0	0	0	0
ENSG00000077080_ACTL6B	0	0	0	0	0	0	0	1	0	0	0	0	0	0	0	0	0	0	0	0	0	0	0	0	0	0	0	0	0	0	0	1	0	0	0	0	0	0	0	0	0	0	0	0	0	0	0	0	0
ENSG00000077092_RARB	0	0	5	0	0	1	0	1	1	0	0	0	0	0	0	0	0	0	0	0	2	0	0	2	0	3	6	0	4	7	8	5	0	0	0	5	0	0	3	0	2	0	0	0	6	0	0	1	0
ENSG00000077097_TOP2B	2400	2307	1043	1094	2220	1051	1553	1403	3258	2054	4878	2103	1937	1789	2654	2151	4400	1568	870	955	2105	2701	987	3238	1414	8214	5975	3434	3476	3974	3906	6623	3238	1978	2338	2645	3344	2369	2353	868	2115	1402	2705	1973	2364	2662	876	2026	1795
ENSG00000077147_TM9SF3	1426	490	978	480	1110	373	843	548	1640	906	1797	996	1054	1370	1427	1134	1837	1059	353	690	1217	1385	443	1469	851	2075	2047	1379	1662	1614	1500	2401	1464	1503	1891	1411	1813	1646	1478	401	1234	900	1302	1403	1710	1732	628	1473	1438
ENSG00000077150_NFKB2	2	6	42	32	6	88	10	1	48	16	51	6	15	11	19	54	3	19	6	1	4	2	0	85	13	301	499	179	49	106	75	184	50	2	2	18	2	21	15	1	9	4	6	10	28	21	5	3	2
ENSG00000077152_UBE2T	0	0	0	1	12	11	0	0	2	0	8	1	0	0	1	0	0	0	0	0	0	2	0	1	0	36	33	2	12	7	8	11	5	0	0	1	0	6	0	0	2	0	9	2	0	2	22	0	0
ENSG00000077157_PPP1R12B	69	31	14	170	3	4	38	10	140	46	54	31	55	16	62	162	20	61	17	43	35	33	0	105	0	414	651	268	91	121	214	339	72	45	44	61	80	51	21	15	56	18	78	46	69	78	33	28	49
ENSG00000077232_DNAJC10	317	127	182	148	178	69	18	221	488	124	517	175	106	153	324	154	290	145	162	16	265	275	175	497	126	1403	1005	317	386	567	624	1153	326	246	291	267	349	270	170	66	264	203	435	254	124	316	89	209	165
ENSG00000077235_GTF3C1	572	166	363	256	283	108	342	272	770	270	813	322	408	393	554	555	732	362	185	206	335	542	95	695	160	2117	1330	570	746	1006	859	1549	742	361	470	264	514	483	491	241	431	390	335	358	569	459	235	352	329
ENSG00000077238_IL4R	2	22	50	40	15	6	6	2	92	19	108	6	2	8	31	174	0	14	56	27	9	0	13	92	0	589	1291	562	91	190	163	284	121	1	7	30	15	45	0	0	12	0	7	0	2	41	17	15	1
ENSG00000077254_USP33	5249	3514	2966	2170	3576	2242	3333	2584	4985	3679	7155	4280	3178	4078	3998	3117	6057	3211	1607	2196	3484	4199	1643	5290	1931	4160	4285	5844	4646	4086	4068	4899	3466	4055	4949	5242	5682	5073	4564	2035	3998	2813	5309	4171	4684	4251	2255	4746	4952
ENSG00000077264_PAK3	0	0	0	0	0	1	2	0	1	0	0	0	0	0	0	0	0	0	0	0	0	0	0	0	0	0	0	0	0	0	0	0	0	0	0	0	0	0	0	0	0	0	0	0	0	0	0	0	0
ENSG00000077274_CAPN6	0	0	0	0	0	2	0	0	0	0	0	0	0	0	0	0	0	0	0	0	0	0	0	0	30	0	0	0	0	0	0	0	0	0	0	0	0	0	0	0	0	0	0	0	0	0	0	0	0
ENSG00000077279_DCX	0	0	0	0	0	5	0	0	0	0	0	0	0	0	0	0	0	0	0	0	0	0	1	0	0	0	0	0	0	0	0	0	0	0	0	0	0	0	0	0	0	0	0	0	0	0	0	0	0
ENSG00000077312_SNRPA	4	6	1	13	19	15	7	0	57	0	26	4	1	4	24	15	24	5	5	0	6	18	0	38	4	162	104	15	24	37	59	116	20	4	9	8	1	10	1	0	11	0	8	9	14	11	9	3	0
ENSG00000077327_SPAG6	0	0	0	0	0	1	0	0	0	0	6	2	0	0	0	0	0	6	0	0	3	0	8	0	0	3	1	2	2	0	0	0	0	0	4	1	0	0	10	0	8	0	0	0	0	0	0	1	28
ENSG00000077348_EXOSC5	0	0	1	0	14	8	0	1	0	0	11	0	0	0	1	0	0	0	28	0	0	0	0	1	0	19	26	2	4	5	2	19	2	0	1	0	0	0	0	0	1	0	0	1	0	0	0	0	0
ENSG00000077380_DYNC1I2	1635	642	961	1043	1152	697	1017	841	1535	1044	2130	912	1314	1357	1249	622	1939	1168	665	829	1250	1408	832	1326	812	1450	1176	917	1410	1266	1160	1405	1717	1558	1662	1071	2261	1459	1700	746	1404	1071	848	1326	1751	1606	540	1402	1824
ENSG00000077420_APBB1IP	125	240	812	590	335	81	16	431	705	133	364	361	290	69	307	1305	35	98	273	98	344	81	119	817	67	3118	6242	2307	441	864	1197	2064	837	221	96	403	182	394	321	30	144	115	354	57	233	256	178	578	200
ENSG00000077454_LRCH4	268	103	250	217	220	35	125	130	465	135	454	198	67	99	237	467	204	87	104	188	181	149	76	433	50	1553	2494	1005	359	520	466	792	290	104	172	243	127	208	117	104	167	86	297	134	164	165	47	146	99
ENSG00000077458_FAM76B	136	67	153	106	122	118	51	29	166	113	218	93	159	135	275	110	131	99	169	64	99	98	25	184	65	634	525	285	190	237	195	453	186	102	105	156	170	190	60	42	118	54	154	134	172	173	108	110	129
ENSG00000077463_SIRT6	0	33	16	3	0	6	0	3	12	0	42	10	0	0	2	1	2	0	2	0	0	0	10	27	22	62	50	17	23	28	33	52	20	1	1	4	10	4	3	2	11	9	14	1	2	12	2	10	3
ENSG00000077498_TYR	0	0	0	0	0	2	0	1	0	0	0	0	0	0	0	0	0	0	0	0	0	0	0	0	0	0	0	0	0	0	0	0	0	0	0	0	0	0	0	0	0	0	0	0	0	0	0	0	0
ENSG00000077514_POLD3	28	1	91	16	0	13	2	9	28	13	17	15	0	14	26	9	0	6	38	0	7	1	0	42	0	191	182	54	22	45	62	79	29	2	2	16	3	0	0	0	6	0	10	16	2	18	0	0	3
ENSG00000077522_ACTN2	0	0	0	0	0	1	0	0	0	0	0	0	0	0	0	0	0	0	0	0	0	0	0	0	0	0	0	0	0	0	0	0	0	0	0	0	0	0	0	0	0	0	0	0	0	0	0	0	0
ENSG00000077549_CAPZB	17727	10380	8638	4926	17668	6140	12272	11956	22918	11739	26394	11770	9515	14026	12902	12881	17666	13939	6298	8540	14176	17817	7242	12388	9400	9658	9908	15502	15388	13029	14868	11852	17140	15132	14670	13150	18078	11840	18153	6336	12572	12078	17931	15426	17379	15953	6783	14930	14224
ENSG00000077585_GPR137B	630	706	121	309	469	716	619	410	1107	1119	673	1135	343	387	499	437	1065	683	185	176	605	258	558	495	189	379	423	415	735	284	422	579	541	973	1016	512	327	444	818	666	1477	262	1085	590	1022	788	544	857	1261
ENSG00000077616_NAALAD2	0	0	0	0	0	39	0	0	0	0	0	0	0	0	0	0	0	0	0	0	0	0	0	0	0	0	0	2	1	0	1	3	0	7	0	0	0	0	0	0	0	0	0	0	0	0	0	0	0
ENSG00000077684_PHF17	40	97	1	59	34	34	1	16	152	18	77	6	6	37	51	112	21	14	0	0	24	10	50	136	51	773	412	135	71	145	134	531	57	25	19	25	13	78	4	9	47	4	88	5	23	50	53	22	0
ENSG00000077713_SLC25A43	285	57	132	138	264	119	174	119	482	206	195	182	88	460	145	271	379	307	126	107	270	124	68	222	179	202	118	164	236	187	149	239	256	235	374	242	197	173	424	358	313	159	197	246	302	204	166	248	345
ENSG00000077721_UBE2A	358	291	270	119	262	267	193	204	524	277	435	234	200	315	224	201	403	241	184	229	243	172	150	314	119	437	360	264	268	319	172	329	285	190	181	272	219	253	293	184	223	301	328	270	285	209	148	325	218
ENSG00000077782_FGFR1	4	3	26	2	0	143	95	10	44	0	4	0	30	0	0	0	0	0	0	0	0	5	0	12	26	30	24	3	9	40	1	49	0	0	0	0	0	6	2	0	0	0	65	0	0	17	20	0	9
ENSG00000077800_FKBP6	0	0	0	0	0	0	0	0	0	0	0	0	0	0	0	0	0	0	0	0	0	0	0	0	0	0	3	1	3	0	0	2	0	7	0	0	0	0	0	0	0	0	0	7	0	0	0	0	0
ENSG00000077809_GTF2I	6348	3214	3749	2367	6615	1516	4853	5859	8191	5834	14129	5215	3040	6353	6195	6711	7181	5185	1573	3002	5745	6367	4084	7007	2652	9548	12026	6133	7370	8467	6546	8867	8729	5530	11380	7275	5444	9565	7212	2358	7181	7939	7771	6783	5323	6413	3855	5424	5543
ENSG00000077935_SMC1B	0	1	0	0	0	0	0	0	0	0	0	0	19	0	0	0	13	21	0	7	0	4	0	17	0	2	0	2	2	7	3	10	5	4	3	22	0	5	3	0	0	0	1	0	0	0	5	5	1
ENSG00000077942_FBLN1	0	25	2	2	0	160	2	1	3	0	0	0	0	0	28	0	0	0	0	0	0	0	0	0	11	0	5	0	0	0	0	0	0	0	1	0	0	0	0	0	0	0	2	0	0	0	3	1	1
ENSG00000077943_ITGA8	0	0	3	0	0	5	0	3	0	0	0	0	0	0	0	0	0	0	0	0	0	0	0	0	0	0	0	1	0	0	0	0	0	0	0	0	0	0	0	0	0	0	0	0	0	0	0	0	0
ENSG00000077984_CST7	145	248	372	96	549	21	66	20	938	112	504	79	55	44	332	210	48	52	189	79	194	100	562	570	23	2996	804	481	198	444	1051	1743	340	570	146	181	103	345	13	31	109	121	180	74	142	203	7	60	170
ENSG00000078018_MAP2	104	169	179	139	248	32	86	98	175	332	297	293	503	327	368	370	411	498	116	103	653	301	172	157	254	172	162	235	450	801	243	347	372	395	492	174	366	264	423	58	288	170	698	150	221	642	175	266	219
ENSG00000078043_PIAS2	250	227	197	42	281	112	74	129	478	273	240	354	238	341	446	305	324	333	224	235	296	228	314	589	366	472	401	408	310	295	491	535	390	413	543	627	441	647	378	203	284	293	336	295	394	459	348	513	395
ENSG00000078053_AMPH	0	0	0	0	0	52	0	1	1	0	0	0	0	0	0	0	0	0	0	0	0	0	0	7	0	6	2	0	0	1	17	16	0	0	0	0	0	0	2	0	2	1	0	0	0	0	0	0	0
ENSG00000078061_ARAF	625	441	383	212	983	124	358	407	963	584	1176	344	491	333	552	518	706	366	256	242	523	551	198	427	244	1110	919	525	631	698	654	699	602	457	305	543	774	373	716	277	422	330	627	553	651	588	244	583	783
ENSG00000078070_MCCC1	56	53	94	53	58	36	36	43	211	90	127	67	48	104	72	104	116	77	11	99	128	91	92	170	82	517	319	140	138	149	204	354	104	123	178	154	116	213	133	100	147	30	101	56	207	175	156	157	91
ENSG00000078081_LAMP3	0	1	1	2	11	2	15	1	9	0	10	0	0	0	0	0	0	5	0	0	0	3	0	0	0	0	12	6	1	0	0	4	0	0	0	0	10	2	1	0	0	0	6	0	3	0	1	7	0
ENSG00000078098_FAP	0	0	0	0	0	1	1	0	2	0	21	0	0	0	0	0	0	0	0	0	0	0	0	0	0	1	1	0	0	0	0	0	0	0	0	0	0	0	0	0	0	0	0	0	0	0	0	0	0
ENSG00000078114_NEBL	0	0	1	1	0	1	0	0	25	0	0	0	0	0	0	0	1	5	0	0	5	0	0	10	0	0	11	0	0	1	0	3	6	2	0	0	3	0	0	0	0	0	0	0	0	0	0	0	0
ENSG00000078124_ACER3	1424	644	400	892	189	506	229	261	1160	598	136	1517	595	853	488	362	1613	944	475	61	853	1139	8	739	102	463	416	1131	98	927	896	254	2113	707	1024	125	1322	49	1388	689	1660	331	284	1476	1597	1061	313	675	105
ENSG00000078140_UBE2K	1181	2248	1243	1870	1258	1373	1696	525	1699	1030	1976	1156	1588	1485	1265	612	1176	1160	1709	2295	1120	1333	1569	1664	1320	900	1096	1319	1220	1023	1218	1344	1067	1781	1837	1797	1359	1574	1506	1920	1202	1885	1405	1086	1604	1566	1075	1412	1721
ENSG00000078142_PIK3C3	2832	3134	3420	1857	3685	2106	1729	1618	5894	5292	2832	3997	3189	3883	3411	2544	3406	4073	2297	2583	4442	4411	1999	4844	1277	3699	3730	4143	4003	3808	3698	4322	4161	6913	8288	5069	4981	7624	5811	2376	4341	2904	3901	3552	4710	5956	3681	5069	4757
ENSG00000078177_N4BP2	52	25	155	47	96	5	11	53	152	30	148	53	39	98	108	79	105	74	77	47	57	46	29	147	16	596	507	132	109	203	239	415	116	49	51	58	39	105	84	12	56	45	83	86	86	109	53	56	48
ENSG00000078237_C12orf5	8	27	58	1	0	0	0	0	7	0	2	0	0	1	0	0	0	0	5	0	0	1	0	14	0	95	73	13	13	44	30	72	19	8	0	2	0	10	0	0	2	0	3	6	15	13	0	2	0
ENSG00000078246_TULP3	0	0	0	0	0	22	1	0	69	0	3	0	0	0	8	31	1	0	0	0	1	13	0	26	20	134	41	9	18	15	31	60	6	10	9	0	0	7	0	0	4	0	3	0	0	1	0	6	0
ENSG00000078269_SYNJ2	515	137	359	182	165	586	128	413	542	964	952	334	73	211	498	484	505	124	199	273	250	280	298	1065	221	556	807	866	318	278	331	988	120	227	537	812	344	410	240	93	370	412	603	374	429	250	284	297	200
ENSG00000078295_ADCY2	0	0	0	0	0	0	0	0	0	0	0	0	0	0	0	0	0	0	0	0	0	0	0	0	0	0	0	0	0	0	0	0	0	0	0	0	0	0	0	0	0	0	0	0	0	0	0	2	0
ENSG00000078304_PPP2R5C	694	641	412	378	513	377	406	414	1177	423	1120	477	278	510	640	661	653	429	260	445	534	553	278	1144	286	4616	1875	673	808	990	1422	2868	934	470	656	557	996	829	660	404	678	544	670	538	729	624	270	513	432
ENSG00000078319_PMS2P1	251	2	313	0	142	169	143	143	282	321	148	173	55	277	103	252	107	296	208	0	199	104	0	322	0	680	390	200	211	233	168	482	195	154	353	360	326	419	303	60	247	158	302	189	169	298	180	332	204
ENSG00000078328_RBFOX1	0	0	0	0	0	2	0	0	0	0	0	0	0	0	0	0	0	0	0	0	0	0	0	0	0	0	0	0	0	0	0	0	0	0	0	0	0	0	0	0	0	0	0	0	0	0	1	0	0
ENSG00000078369_GNB1	7014	2531	2198	1411	7640	1917	3307	4346	9358	4731	9665	5151	4564	7022	5645	6567	8722	5652	2943	2823	5965	6957	1967	4660	2980	5194	5190	5636	6811	6323	5540	5504	8318	5889	5780	6028	7152	5174	8386	2418	5687	4218	6014	7007	7065	7088	3266	6624	6495
ENSG00000078399_HOXA9	0	0	0	0	0	1	0	0	0	0	0	0	0	0	0	0	0	0	0	0	0	0	0	15	0	10	15	3	4	4	0	6	3	0	0	0	0	0	0	0	0	0	0	0	0	0	0	0	0
ENSG00000078401_EDN1	0	0	0	0	0	0	0	0	2	0	0	0	0	0	0	0	0	0	0	0	0	4	0	2	0	2	6	0	0	3	0	3	4	0	0	0	0	0	0	0	0	0	0	0	0	0	4	0	0
ENSG00000078403_MLLT10	383	264	382	254	292	114	214	154	786	643	481	464	413	538	502	431	442	535	371	254	496	445	311	621	318	957	596	402	489	507	584	897	517	768	707	593	393	805	560	160	474	339	622	470	396	679	433	528	449
ENSG00000078487_ZCWPW1	9	18	0	0	19	0	5	5	6	3	54	5	0	30	0	21	11	21	0	20	16	6	1	49	0	55	104	18	43	29	4	49	45	19	22	31	20	19	1	0	22	9	13	27	13	10	19	12	19
ENSG00000078549_ADCYAP1R1	0	0	0	0	0	0	0	0	0	0	0	0	0	0	0	0	0	0	0	0	0	0	0	0	0	0	0	0	0	0	0	0	0	0	0	0	0	0	0	0	0	0	0	0	0	0	0	0	0
ENSG00000078579_FGF20	0	0	0	0	0	0	0	0	0	0	0	0	0	0	0	0	0	0	0	0	0	0	0	0	0	1	6	0	0	3	0	3	0	0	0	0	0	0	0	0	0	0	0	0	0	0	0	0	0
ENSG00000078589_P2RY10	490	185	156	229	186	244	234	252	301	339	209	319	331	610	423	107	363	312	197	219	193	392	216	495	48	455	286	244	427	216	172	399	264	342	704	605	486	411	317	245	436	234	371	346	453	392	172	314	223
ENSG00000078596_ITM2A	1294	828	706	494	1841	1034	1156	787	800	831	2272	576	601	1295	1266	1208	1388	898	270	878	1105	1406	510	1529	698	1179	845	1518	1973	1309	786	1445	1227	869	662	1491	1658	1244	2340	456	1288	890	1567	1322	1392	1699	478	1666	1117
ENSG00000078618_NRD1	16450	11397	7667	5461	16070	8569	10464	10598	16850	11893	18958	13012	12667	15346	12992	12787	20684	15099	9348	10239	15875	21081	8729	14961	8098	12498	13869	22337	18054	15098	15001	15522	19762	19128	18475	16497	20133	12924	17838	8656	14804	13477	17609	13938	17372	18478	6991	15544	15090
ENSG00000078668_VDAC3	21131	29091	14218	26570	18429	16726	15208	9404	18489	12733	23101	12874	12727	17457	14322	8831	18090	12722	18215	24478	12184	17505	16279	22473	9620	13611	14306	20398	16136	12909	17091	21103	15953	21200	23410	23954	21592	18303	22857	20713	17773	14445	17437	14248	23571	23706	8731	14135	18767
ENSG00000078674_PCM1	1837	1531	1032	1022	1693	784	586	1434	3161	1146	3451	1235	1381	1308	1776	1629	2492	1460	669	449	1233	1774	540	2479	1297	5034	4200	2727	2353	2659	2759	4852	2258	1835	1754	1621	2251	1810	1998	602	1632	1102	1872	1374	1549	1713	705	1490	1921
ENSG00000078687_TNRC6C	157	77	89	87	161	185	43	91	349	176	212	144	104	156	265	172	78	137	45	65	171	61	112	222	158	975	432	234	198	249	362	583	134	172	292	167	147	308	137	84	170	211	127	125	226	165	177	211	198
ENSG00000078699_CBFA2T2	105	101	36	0	173	85	76	60	140	160	85	105	139	102	103	110	139	139	131	128	137	128	143	225	36	260	199	178	115	135	128	217	161	211	321	175	188	226	150	78	137	159	152	120	165	88	230	182	157
ENSG00000078725_BRINP1	0	0	0	0	0	0	0	1	0	0	0	0	0	0	0	0	0	0	0	0	0	0	0	0	0	0	0	0	0	0	0	0	0	0	0	0	0	0	0	0	0	0	0	0	0	0	0	0	0
ENSG00000078747_ITCH	2777	2161	1515	1632	2392	1031	823	2239	3650	2785	4095	2089	1597	2570	2557	1924	2908	2944	1173	1008	1985	2345	1055	3651	1067	6727	5958	3503	2922	3162	2991	5090	3291	2547	3940	2997	2627	3254	2823	1086	2304	1688	2901	2575	2742	3164	1665	2632	3182
ENSG00000078795_PKD2L2	0	0	0	0	0	0	0	0	0	0	0	0	0	0	0	0	1	0	0	0	0	0	0	0	2	1	2	0	1	1	0	2	0	0	0	0	0	1	0	0	0	0	1	0	0	0	0	0	2
ENSG00000078804_TP53INP2	24	7	1	12	58	4	0	74	88	32	53	32	17	16	70	53	2	10	3	10	41	27	10	26	52	11	48	20	27	24	32	12	30	26	44	12	9	17	22	3	17	30	41	18	27	26	21	13	9
ENSG00000078808_SDF4	148	85	125	100	208	84	65	95	283	118	282	123	108	150	241	256	274	123	139	102	172	189	108	229	41	843	446	194	217	276	325	538	289	152	173	208	212	222	211	87	181	145	257	185	241	174	182	180	182
ENSG00000078814_MYH7B	0	0	0	0	0	2	0	1	3	0	2	0	0	0	4	7	5	2	0	0	0	0	0	3	0	8	17	2	1	1	0	11	1	0	0	0	0	0	0	0	0	0	0	0	0	0	0	0	0
ENSG00000078898_BPIFB2	0	0	0	0	0	1	0	1	0	0	0	0	0	0	0	0	0	0	0	0	0	0	0	0	0	0	0	0	0	0	0	0	0	0	0	0	0	0	0	0	0	0	0	0	0	0	0	0	0
ENSG00000078900_TP73	0	2	0	0	0	4	1	2	0	0	0	0	0	0	0	0	0	0	0	0	0	0	0	0	0	4	9	0	0	1	0	0	0	0	0	0	0	0	0	0	0	0	0	0	0	0	7	0	0
ENSG00000078902_TOLLIP	657	453	561	337	708	441	440	456	892	600	924	729	404	566	550	479	760	563	307	488	525	692	314	607	272	388	321	635	748	573	541	511	563	618	560	620	541	658	752	372	507	662	734	778	732	542	536	599	634
ENSG00000078967_UBE2D4	49	11	47	1	13	4	25	26	74	7	44	21	12	19	36	7	20	63	56	18	69	17	0	31	13	52	26	18	31	28	34	41	45	50	7	23	60	16	43	23	30	32	46	46	50	29	5	32	51
ENSG00000079101_CLUL1	0	0	0	0	0	7	0	0	0	0	0	0	0	0	0	0	0	0	0	0	0	0	0	0	0	0	0	0	0	0	0	0	1	0	0	0	0	0	0	0	0	0	0	0	0	0	0	0	0
ENSG00000079102_RUNX1T1	6	0	0	0	44	3	144	31	35	10	201	25	137	115	33	5	39	2	0	32	88	18	110	190	0	65	80	61	22	21	89	4	15	19	10	8	10	120	34	0	19	66	56	7	1	34	25	31	68
ENSG00000079112_CDH17	0	0	0	0	0	1	0	0	0	0	0	0	0	0	0	0	0	0	0	0	0	0	0	0	4	0	3	0	0	0	0	0	5	0	0	0	0	0	0	0	0	0	0	1	0	0	0	0	0
ENSG00000079134_THOC1	42	57	50	0	96	13	1	31	173	37	42	30	47	74	52	37	34	30	0	22	52	65	1	162	28	597	378	79	73	157	224	455	68	39	84	117	28	107	27	81	45	31	35	46	40	59	0	69	24
ENSG00000079150_FKBP7	4	0	0	0	0	2	0	0	2	5	0	0	3	0	13	8	0	0	0	0	0	6	0	0	0	16	1	3	5	2	0	5	4	0	12	0	0	0	0	6	0	0	3	0	0	2	0	0	0
ENSG00000079156_OSBPL6	204	24	81	1	132	4	64	78	194	95	347	200	413	130	109	84	226	69	75	83	111	96	49	70	28	66	88	141	130	182	89	99	239	70	117	57	151	37	164	12	124	56	191	49	49	122	7	116	230
ENSG00000079215_SLC1A3	0	0	1	0	0	2	1	0	2	0	0	0	66	0	0	0	0	0	0	0	0	0	0	0	0	0	5	0	0	2	0	1	6	0	0	0	0	0	0	0	0	0	0	0	0	0	19	0	0
ENSG00000079246_XRCC5	1982	1494	1167	938	1472	962	929	1348	2813	954	3350	1326	1272	1424	1654	2235	2815	1508	891	757	1441	1763	849	2643	706	4758	4287	2258	2147	2877	2567	4068	2300	1612	1778	1645	2169	1621	2000	1029	1650	1346	2358	1500	2070	2148	630	1499	1724
ENSG00000079257_LXN	728	387	96	1339	525	66	190	122	469	105	1194	200	115	635	323	226	144	125	52	50	265	362	251	347	886	187	183	165	163	152	278	221	385	378	365	186	226	187	46	135	442	310	317	376	154	339	383	40	543
ENSG00000079263_SP140	111	48	4	118	11	1	4	9	488	43	277	3	14	0	97	103	14	2	0	0	24	8	0	311	47	2073	1013	295	192	414	828	1384	215	12	9	161	31	125	19	44	48	11	180	3	3	41	0	6	0
ENSG00000079277_MKNK1	937	538	435	279	502	420	401	498	754	743	1163	397	413	486	570	437	1160	636	300	482	727	898	327	718	408	845	1040	916	701	668	782	769	954	534	688	379	914	513	783	346	616	419	1044	733	1104	473	329	767	527
ENSG00000079308_TNS1	5694	951	4234	737	1373	440	1840	1715	4856	4036	3479	4758	2288	3074	1941	3768	4139	3975	875	2271	2881	3052	2032	2103	1648	3700	4064	7345	3755	4998	4061	2775	3208	3926	4812	8505	5410	3880	2192	2268	4685	3926	5100	3954	2770	3410	3869	3901	5012
ENSG00000079313_REXO1	82	4	26	6	91	17	40	44	275	80	151	51	96	44	148	131	194	38	64	31	52	54	25	126	14	622	487	173	108	139	228	352	116	50	56	106	40	77	81	45	76	57	174	80	67	78	25	42	65
ENSG00000079332_SAR1A	766	346	287	198	451	158	394	356	722	651	915	447	493	681	403	429	518	617	306	327	639	719	239	809	286	1245	820	530	778	637	644	1076	821	700	800	698	739	517	842	289	715	339	466	693	935	446	352	616	485
ENSG00000079335_CDC14A	425	197	286	304	538	391	211	272	733	425	514	392	447	445	542	333	410	503	141	399	505	505	259	510	133	640	509	486	475	440	484	632	432	579	760	479	532	999	529	145	390	495	443	387	591	666	1089	506	496
ENSG00000079337_RAPGEF3	0	0	12	0	0	15	0	1	0	0	0	0	0	0	4	0	0	0	0	5	4	1	0	12	0	1	25	3	2	7	3	5	0	0	11	9	8	0	0	0	1	0	0	0	0	1	0	6	1
ENSG00000079385_CEACAM1	0	3	44	3	0	1	1	1	0	6	0	0	0	5	0	188	8	0	0	0	1	0	11	124	0	85	613	149	15	59	18	23	37	4	0	0	43	0	0	0	1	0	11	10	5	3	1	0	0
ENSG00000079387_SENP1	1836	704	462	746	1372	517	892	682	1937	1481	2512	1543	1358	1303	1841	1099	2538	1269	352	680	1247	1741	719	1272	735	1253	995	2052	1876	1368	1443	1460	1859	1640	1764	1890	1670	1008	1411	601	1286	587	1685	1430	1598	1705	637	1567	1318
ENSG00000079393_DUSP13	0	0	0	0	0	1	0	0	0	0	0	0	0	0	0	2	0	0	0	0	0	0	0	0	0	0	2	1	0	0	0	0	0	0	0	0	0	0	0	0	0	0	0	0	0	0	0	0	0
ENSG00000079432_CIC	1329	392	300	122	1631	364	368	1115	1966	1068	2221	1107	878	857	1509	1124	1501	696	298	397	810	1274	368	724	762	1499	1754	1576	1634	1552	1321	1472	1538	930	1445	1286	575	911	1378	391	967	908	1586	915	929	1156	619	855	771
ENSG00000079435_LIPE	0	0	10	0	0	2	0	3	4	0	0	0	0	2	8	0	0	0	0	0	3	0	0	3	0	30	37	4	3	4	27	23	5	0	0	0	1	0	0	0	2	0	1	0	0	0	0	0	0
ENSG00000079459_FDFT1	487	477	282	333	357	400	197	271	626	288	846	202	177	334	278	330	395	302	165	143	329	261	184	500	119	1160	962	404	491	484	415	777	369	214	401	401	416	298	367	114	318	205	364	378	400	344	93	220	271
ENSG00000079462_PAFAH1B3	1	9	0	1	0	15	0	0	0	0	4	0	0	0	8	6	0	0	0	0	0	0	0	5	0	33	11	4	1	7	13	18	1	0	0	0	0	11	0	0	0	0	0	0	0	0	4	0	1
ENSG00000079482_OPHN1	2867	1305	1351	1313	1732	1269	1436	1292	3156	2632	2929	2307	1461	3048	2827	1432	2941	1961	1304	1528	2447	2445	1460	2510	989	1506	1345	2126	2647	1867	1951	2203	2281	2670	3191	3279	2251	3533	2454	1383	2535	1967	2796	2108	2754	2659	2604	2893	2388
ENSG00000079557_AFM	0	0	0	0	0	1	0	0	0	0	0	0	0	0	0	0	0	0	0	0	0	0	0	0	0	0	0	1	0	0	0	0	0	0	0	0	0	0	0	0	0	0	0	0	0	0	1	0	0
ENSG00000079616_KIF22	41	41	178	32	79	45	2	52	200	0	79	17	8	1	40	38	30	23	23	23	10	4	11	86	9	644	267	35	42	94	173	432	52	11	10	20	36	66	3	1	12	0	23	3	35	34	22	1	12
ENSG00000079689_SCGN	6	0	0	0	0	1	0	0	0	0	0	0	0	0	0	0	0	0	0	0	0	0	0	0	0	0	1	0	0	0	0	0	0	0	0	0	0	0	0	0	0	0	0	0	0	0	0	0	0
ENSG00000079691_LRRC16A	1692	166	534	271	990	534	371	531	1978	759	2024	875	625	1094	745	888	1819	1311	594	712	755	792	358	1105	285	321	591	1182	972	390	470	586	848	1458	1203	511	937	1489	936	473	638	1640	2031	1162	765	1095	875	1317	1981
ENSG00000079739_PGM1	1804	556	177	278	1318	896	400	728	1230	893	1368	1461	1318	1597	622	1204	1550	1572	204	849	1554	1778	830	952	620	1327	958	696	1599	612	916	1256	2152	1509	413	499	1530	559	1867	473	1159	534	815	928	1591	1857	340	561	505
ENSG00000079785_DDX1	192	239	490	312	358	125	272	93	436	218	499	132	243	150	279	151	437	167	95	50	122	164	136	481	317	1363	742	398	288	488	459	1084	373	209	346	167	305	191	154	28	133	88	242	152	350	293	84	181	204
ENSG00000079805_DNM2	1913	529	607	458	1754	754	541	1390	2913	980	2899	1291	1099	1245	1601	1726	1954	1081	670	980	1263	1248	737	1982	755	6425	5254	2720	1964	2583	2675	3824	1824	1093	1366	1524	1161	1482	1520	409	1285	1430	1989	1307	1489	1266	899	1386	1107
ENSG00000079819_EPB41L2	301	49	88	80	65	90	81	48	347	171	198	154	168	101	111	66	146	181	0	91	172	177	159	277	147	147	180	163	113	188	294	137	163	104	275	232	286	199	147	92	126	189	275	288	133	182	87	136	191
ENSG00000079841_RIMS1	0	0	0	0	0	0	0	1	0	0	0	0	0	0	0	0	0	0	0	0	0	0	0	0	0	0	0	0	1	0	0	0	0	0	0	0	0	0	0	0	0	0	0	0	0	0	1	0	0
ENSG00000079931_MOXD1	0	0	2	0	7	13	4	1	1	0	0	0	13	0	0	0	0	0	0	0	0	1	0	0	0	0	5	1	1	0	0	2	0	1	0	0	0	0	0	0	0	0	0	0	0	1	0	0	0
ENSG00000079950_STX7	4807	4362	2247	3119	3943	2274	2679	1959	4316	2884	5367	3256	2983	3377	3359	3155	5324	3027	1940	2792	3414	3906	3160	4291	2775	2240	3905	4997	4826	3605	3447	4556	3935	4112	3845	3739	3244	3560	3404	2663	3219	2541	3631	2900	4146	3630	1720	3093	4133
ENSG00000079974_RABL2B	64	5	110	0	24	1	31	51	77	66	99	11	0	18	10	53	9	3	5	0	83	13	0	81	0	542	268	53	39	69	341	346	53	12	74	71	39	128	13	21	3	57	11	0	5	6	55	7	37
ENSG00000079999_KEAP1	155	52	32	5	157	48	34	97	129	74	279	84	127	144	184	101	100	65	38	103	92	99	58	185	12	339	190	173	153	129	171	299	103	105	137	139	163	89	108	65	91	111	151	90	87	49	142	73	105
ENSG00000080007_DDX43	0	0	16	0	0	0	0	0	58	0	0	3	3	7	9	0	2	9	0	0	9	0	7	27	0	34	22	24	12	32	51	6	3	39	1	36	30	2	1	0	4	1	19	0	0	0	0	3	0
ENSG00000080031_PTPRH	2	0	0	0	0	24	54	11	0	0	0	0	0	0	0	0	0	0	0	0	0	0	0	0	13	3	12	4	0	1	0	0	0	0	0	0	0	0	0	0	3	0	0	0	0	0	17	0	0
ENSG00000080166_DCT	32	0	0	4	14	0	0	19	6	26	24	44	0	26	21	25	6	15	21	0	14	4	11	3	0	10	7	8	9	4	16	9	2	6	19	17	41	0	16	0	8	0	7	11	4	6	0	5	5
ENSG00000080189_SLC35C2	152	50	77	47	82	107	61	87	160	99	162	78	89	83	75	178	112	51	54	40	70	79	93	154	10	404	346	111	122	142	81	321	95	43	89	111	83	128	111	92	86	121	107	81	125	94	23	88	81
ENSG00000080200_CRYBG3	0	1	1	1	0	1	4	2	18	11	18	22	0	25	4	41	30	6	0	0	7	8	10	22	0	37	96	14	21	58	28	63	4	13	19	19	6	33	18	0	3	11	12	9	0	8	5	6	19
ENSG00000080224_EPHA6	0	0	1	0	0	3	0	0	0	0	0	0	0	0	0	0	0	0	0	0	0	0	0	0	0	0	0	0	0	0	0	0	0	0	0	0	0	0	0	0	0	0	0	0	0	0	0	0	0
ENSG00000080293_SCTR	0	0	0	0	0	1	0	1	0	0	0	0	0	0	0	0	0	0	0	0	0	0	0	0	0	0	0	0	0	0	0	0	0	0	0	0	0	0	0	0	0	0	0	0	0	0	0	0	0
ENSG00000080298_RFX3	1110	483	241	97	805	185	571	545	1344	1141	1501	633	823	1172	742	560	1389	1167	281	389	869	1282	269	761	509	835	697	1084	1186	1120	765	941	1231	1103	1519	769	1582	958	1237	438	1175	764	1034	1034	993	1319	708	1086	1321
ENSG00000080345_RIF1	996	456	593	199	853	318	255	464	1169	831	1148	670	597	636	654	810	819	745	335	299	713	648	290	1061	200	2954	2137	1079	958	1279	1372	2365	988	919	988	727	1048	1154	840	301	872	481	998	521	896	983	306	823	674
ENSG00000080371_RAB21	1596	920	723	912	756	726	590	778	1642	1172	2283	1115	898	1177	1305	842	1649	826	740	839	985	1110	468	1136	915	1173	1232	1223	976	1088	1024	1281	1159	1394	1136	1184	1494	1263	1338	615	1114	814	1411	1145	1308	1250	556	1363	1352
ENSG00000080493_SLC4A4	13	38	0	0	0	0	0	1	62	1	59	1	0	9	23	31	0	1	0	0	10	1	0	42	0	209	157	42	47	43	54	184	46	0	0	0	0	9	0	31	5	0	21	6	6	35	0	5	3
ENSG00000080503_SMARCA2	11525	4928	5448	3381	9515	3664	4971	9393	12111	9567	14806	9733	6243	8828	9600	8721	12384	6912	3407	7131	7471	8252	5000	8507	4244	9639	8920	10860	9602	10727	8608	10080	8397	8860	12647	10371	11707	11654	9747	4939	8440	9923	9429	7877	9123	9675	5996	8970	8395
ENSG00000080511_RDH8	0	0	0	0	0	1	0	0	0	0	1	0	0	0	0	0	0	0	0	0	0	0	0	0	0	0	0	0	0	0	0	0	0	0	0	0	0	0	0	0	0	0	0	0	0	0	0	0	0
ENSG00000080546_SESN1	219	70	57	47	32	60	80	219	176	71	184	105	35	122	169	21	132	58	43	17	110	109	28	229	21	357	306	171	167	210	149	285	131	63	60	128	90	107	127	10	126	35	167	125	140	95	0	101	91
ENSG00000080561_MID2	0	23	0	0	0	6	0	3	4	0	0	0	0	0	0	0	0	0	0	0	0	7	0	10	16	9	12	1	5	0	17	5	8	7	0	0	0	0	0	0	4	14	0	6	0	3	0	0	0
ENSG00000080572_PIH1D3	0	0	0	0	0	0	0	0	0	0	0	0	0	0	0	0	0	0	0	0	0	0	0	0	0	0	0	0	0	0	0	0	0	0	0	0	0	0	0	0	0	0	0	0	0	0	0	0	0
ENSG00000080573_COL5A3	0	0	0	1	0	2	2	2	2	0	4	0	0	0	0	0	0	0	0	0	0	5	0	0	0	53	1	1	8	0	30	3	0	0	0	0	0	0	0	0	0	0	0	0	0	0	0	0	1
ENSG00000080603_SRCAP	1119	511	344	243	1516	270	363	1366	2130	929	2570	811	784	812	1195	1496	1414	688	441	485	816	939	476	1404	584	4701	3612	1555	1223	1875	1686	3491	1406	692	949	1291	752	914	1052	361	738	928	1303	564	1011	889	569	850	1063
ENSG00000080608_KIAA0020	80	81	127	66	152	11	0	63	265	71	175	76	37	45	140	135	113	98	8	13	177	122	98	194	52	586	330	208	114	183	224	606	160	100	129	187	105	151	98	19	111	87	208	60	93	175	74	101	77
ENSG00000080618_CPB2	0	0	0	0	0	0	0	0	0	0	0	0	0	0	0	0	0	0	0	0	0	0	0	0	0	0	0	0	0	2	0	0	0	0	0	0	0	0	0	0	0	0	0	0	0	0	0	0	0
ENSG00000080644_CHRNA3	0	0	0	0	0	2	0	1	0	0	0	0	0	0	0	0	0	0	0	0	0	0	0	0	0	0	0	0	0	0	0	0	0	0	0	0	0	0	0	0	0	0	0	0	0	0	0	0	0
ENSG00000080709_KCNN2	0	0	0	0	0	1	0	5	0	0	0	0	0	0	0	0	2	0	0	0	0	1	0	2	0	0	0	0	0	0	0	3	0	0	0	0	0	0	0	0	0	0	0	0	0	0	0	3	0
ENSG00000080802_CNOT4	251	46	202	60	316	48	77	116	352	122	375	199	213	297	273	214	245	242	101	75	171	249	65	287	159	567	410	205	276	260	345	506	276	231	345	206	319	326	131	117	245	115	243	186	325	340	126	271	224
ENSG00000080815_PSEN1	473	382	1127	538	669	498	684	438	998	477	472	504	267	584	590	657	560	514	348	453	615	596	590	1125	228	1778	2012	1005	692	761	893	1159	725	756	1030	838	691	901	700	442	580	617	819	538	903	790	824	740	633
ENSG00000080819_CPOX	98	48	96	0	39	16	89	52	120	48	202	22	89	8	48	109	117	34	26	18	39	30	58	123	42	129	133	62	79	53	86	143	32	36	32	30	42	36	17	14	24	88	113	21	62	36	2	38	16
ENSG00000080822_CLDND1	524	230	225	260	307	468	212	87	409	159	660	148	178	388	157	217	233	255	214	304	190	214	258	313	87	709	497	257	314	308	470	445	231	260	325	275	320	274	273	198	251	124	232	281	299	312	137	220	391
ENSG00000080823_MOK	0	0	0	0	2	6	0	0	6	1	20	4	0	0	0	0	0	1	17	0	0	4	0	3	0	9	14	3	3	4	2	5	3	2	3	0	0	0	0	0	0	3	0	2	1	1	8	0	0
ENSG00000080824_HSP90AA1	5565	4363	2648	2285	4244	2894	3486	2561	5888	3442	8410	3423	4168	4771	4016	3745	7284	4193	2456	3369	4202	6847	2124	6821	2646	12908	8968	4894	6692	7106	8883	11122	6462	4742	4200	4950	11715	4740	5212	3152	4268	4351	5838	5295	6483	4752	2222	5445	5018
ENSG00000080839_RBL1	564	312	352	73	354	282	232	355	735	1030	446	660	445	648	626	572	628	676	226	222	581	689	288	908	314	873	780	778	701	677	789	1141	791	1100	1475	1065	863	1540	696	315	696	523	686	668	891	1116	571	1002	843
ENSG00000080845_DLGAP4	90	49	31	30	213	32	37	81	215	110	118	67	186	136	84	201	91	155	28	90	136	107	7	96	47	199	245	120	223	149	123	210	183	90	70	90	180	62	250	48	70	96	82	168	120	96	14	189	48
ENSG00000080854_IGSF9B	0	1	2	42	1	6	2	5	2	23	33	0	26	127	43	88	268	38	13	13	42	94	25	1	32	7	33	43	84	3	8	10	2	42	180	39	119	4	0	0	164	0	2	55	0	47	93	0	52
ENSG00000080910_CFHR2	0	0	0	0	0	1	0	0	0	0	0	0	0	0	0	0	0	0	0	0	0	0	0	0	0	0	0	0	0	0	0	0	0	0	0	0	0	0	0	0	0	0	0	0	0	0	0	0	0
ENSG00000080947_CROCCP3	0	0	0	0	0	8	0	0	12	0	10	0	0	0	0	15	0	0	0	0	0	0	0	6	0	84	39	5	8	18	27	46	10	0	0	4	0	4	0	0	4	0	2	0	0	1	0	0	0
ENSG00000080986_NDC80	27	15	1	16	43	38	6	22	133	34	53	31	91	41	23	56	30	49	10	4	26	54	62	44	0	69	100	60	58	54	35	54	36	55	67	72	34	78	42	10	32	9	77	30	73	61	49	44	17
ENSG00000081014_AP4E1	271	393	70	154	236	76	128	174	472	486	383	336	243	390	443	176	426	327	79	131	387	377	169	497	98	864	424	399	432	397	596	690	479	505	677	497	413	625	516	50	392	183	574	371	436	502	113	405	465
ENSG00000081019_RSBN1	68	17	11	22	59	5	18	7	116	4	101	21	77	18	64	86	40	23	1	0	9	28	0	85	28	556	350	109	87	144	132	350	78	24	24	44	32	67	42	2	21	15	50	22	32	51	23	29	38
ENSG00000081026_MAGI3	23	44	2	18	35	16	6	21	142	36	11	12	0	49	110	38	74	42	27	9	24	44	102	67	53	53	71	71	65	49	78	43	108	51	41	66	45	138	31	20	44	83	46	87	39	236	108	95	4
ENSG00000081041_CXCL2	7	3	3	0	4	12	1	0	16	13	5	0	1	1	3	2	1	4	7	9	3	14	11	2	0	2	5	10	4	0	5	7	4	3	9	6	10	11	10	3	4	1	11	2	5	5	3	5	6
ENSG00000081051_AFP	0	0	0	0	0	2	0	0	0	0	0	0	0	0	0	0	0	0	0	0	0	0	0	0	0	0	0	0	0	0	0	0	0	0	0	0	0	0	0	0	0	0	0	0	0	0	0	0	0
ENSG00000081052_COL4A4	0	1	2	2	0	5	0	1	3	0	4	8	0	0	0	12	0	0	6	0	0	1	0	5	0	25	21	17	5	13	0	3	2	0	13	0	0	0	0	0	0	0	0	0	0	0	2	0	0
ENSG00000081059_TCF7	0	5	18	32	25	4	4	1	6	0	64	0	0	1	4	69	2	10	4	0	0	0	7	29	0	193	139	39	16	24	19	71	9	3	0	3	0	6	0	5	4	5	10	0	5	6	2	3	0
ENSG00000081087_OSTM1	1250	564	498	535	877	257	1196	790	1417	707	1896	1060	823	1605	1094	1103	2070	1312	434	444	1131	1284	346	1007	339	1357	1204	1057	2066	1436	1436	1385	1692	1457	942	1229	1676	1208	1383	493	1350	531	1342	1449	1620	1514	315	1265	1283
ENSG00000081138_CDH7	0	0	0	0	0	0	0	1	1	0	13	0	0	0	0	0	0	0	0	0	0	0	0	0	0	0	0	0	0	0	10	0	4	0	0	0	0	0	0	0	0	0	0	0	0	0	0	0	0
ENSG00000081148_IMPG2	66	0	0	11	13	1	0	8	113	6	48	13	2	0	27	23	49	34	0	0	36	20	15	27	0	50	38	36	42	46	41	49	62	64	50	41	27	26	56	0	28	0	70	19	18	51	12	51	41
ENSG00000081154_PCNP	10217	18338	13600	10713	7774	13557	11006	3894	11524	6575	11634	6064	8278	11348	7488	6272	10830	9189	11186	12684	9321	10444	12496	7953	6762	5441	4699	7161	9496	5499	5682	6329	10010	12426	10897	8555	9301	9256	10562	12471	9994	11674	10096	7380	10790	9569	5272	11539	11059
ENSG00000081177_EXD2	15	2	1	3	3	31	52	0	18	29	36	34	0	2	1	0	4	10	0	0	2	5	0	25	0	37	35	10	6	18	5	51	16	6	4	6	0	11	9	0	11	7	0	11	16	34	4	11	10
ENSG00000081181_ARG2	1827	3050	973	822	4703	969	2176	1060	3813	2096	3489	1384	2057	1345	1259	1144	1903	1537	1082	865	2330	1451	732	2935	1039	1280	1507	3179	2601	1266	1704	1788	2864	3225	2058	2218	2105	832	2740	1797	1590	1748	3195	1828	1812	2281	800	1744	2898
ENSG00000081189_MEF2C	4574	2240	1771	1892	2871	2925	1952	2501	3822	4050	5114	2609	2865	5660	4222	2393	7334	3890	3057	4167	4180	4936	1931	4835	2897	3120	2750	4330	4057	3488	3238	3967	4488	4482	6970	4426	6485	4965	4490	3283	4839	3590	3439	4702	5172	5155	3078	5299	4740
ENSG00000081237_PTPRC	1424	4401	7643	5880	2703	224	725	1720	13821	1616	9738	616	865	751	5213	7716	704	539	2098	922	1886	451	1111	14870	187	70237	69104	20009	7383	18725	25108	52815	9884	2579	723	1811	789	5876	922	365	2375	1030	4857	946	2866	3621	239	676	373
ENSG00000081248_CACNA1S	0	0	0	0	0	18	0	1	0	0	0	0	0	0	0	0	0	0	0	0	3	0	0	0	0	0	0	1	0	0	0	0	0	0	0	0	0	0	0	0	0	0	0	3	6	0	0	0	0
ENSG00000081277_PKP1	0	0	4	2	0	0	2	0	4	0	0	0	6	0	0	0	0	0	0	0	0	0	0	19	11	0	0	7	0	2	0	0	0	0	10	0	0	0	0	0	0	0	0	0	0	0	9	1	0
ENSG00000081307_UBA5	12	31	79	59	60	9	29	3	141	60	74	18	0	45	27	34	13	28	1	6	49	10	11	102	0	417	205	89	42	96	172	294	57	16	24	67	33	38	28	38	64	25	17	13	70	47	38	29	46
ENSG00000081320_STK17B	87	122	234	150	66	6	12	33	248	26	194	35	10	12	90	258	68	34	65	47	80	46	21	340	82	1418	1996	722	272	458	488	924	234	42	23	60	39	197	38	44	80	38	111	50	101	157	39	69	33
ENSG00000081377_CDC14B	10947	6684	4517	3201	10402	4329	6893	6321	15117	10033	15243	12012	8940	12578	10874	9727	14287	11909	3943	3932	12727	14808	4411	8416	4167	5911	6416	12284	17631	11534	9934	9134	15198	14280	17146	11658	11570	13553	15703	4619	11493	9922	12291	12878	13510	14454	4834	11705	10688
ENSG00000081386_ZNF510	14	4	6	14	9	3	0	1	48	33	80	11	0	26	63	72	47	7	6	17	21	23	11	95	0	337	132	28	53	82	104	234	66	27	23	23	34	40	10	8	54	6	55	35	55	53	0	19	11
ENSG00000081479_LRP2	0	0	0	0	0	3	0	1	0	0	26	0	0	0	0	1	0	0	0	0	0	1	15	0	0	0	0	0	0	0	0	0	0	0	0	0	0	0	0	0	0	0	0	0	0	0	1	0	0
ENSG00000081665_ZNF506	80	67	72	201	168	202	43	46	214	76	269	47	24	67	72	117	66	62	177	116	85	84	97	206	64	908	535	153	121	173	196	605	162	77	71	93	79	127	67	99	101	173	135	57	112	73	66	97	81
ENSG00000081692_JMJD4	7	0	0	1	7	22	1	25	6	6	8	0	0	0	5	11	10	3	0	0	0	4	0	18	0	100	22	14	13	3	29	31	10	3	0	0	1	3	4	0	4	7	22	5	6	0	0	4	3
ENSG00000081721_DUSP12	14	6	4	10	23	6	2	6	55	7	8	2	0	11	49	21	14	12	31	0	17	5	18	72	0	208	59	22	35	48	29	154	22	19	55	25	18	37	6	10	25	0	17	9	31	28	2	12	23
ENSG00000081760_AACS	5	29	3	1	13	45	7	16	45	0	33	34	22	19	53	28	16	42	7	2	18	14	0	42	1	149	102	31	43	46	37	67	50	22	31	23	13	21	32	5	20	9	34	37	36	17	32	23	5
ENSG00000081791_KIAA0141	42	78	67	33	79	32	52	9	126	35	90	15	5	31	63	70	18	16	47	0	20	27	1	116	45	459	326	85	53	138	132	274	62	21	29	13	32	31	17	9	15	3	31	16	18	42	14	14	13
ENSG00000081800_SLC13A1	0	0	0	0	0	0	0	0	0	0	0	0	0	0	0	0	0	0	0	0	0	0	0	0	0	0	0	0	0	0	0	0	0	0	0	0	0	0	0	0	0	0	0	0	0	0	0	0	0
ENSG00000081803_CADPS2	0	0	1	0	0	27	0	0	4	59	7	4	0	4	0	0	2	2	0	0	1	0	0	12	0	1	1	6	8	8	9	0	2	1	30	4	10	7	0	0	0	0	0	4	9	0	1	0	0
ENSG00000081818_PCDHB4	0	0	2	0	0	3	0	1	0	0	0	0	0	0	0	0	0	0	0	0	0	0	0	0	0	0	0	0	0	0	0	0	0	0	0	0	0	0	0	0	0	0	0	0	0	0	2	0	0
ENSG00000081842_PCDHA6	0	0	0	0	0	3	0	3	0	0	0	0	0	0	0	0	0	0	0	0	0	0	0	0	0	0	0	0	0	0	0	0	0	0	0	0	0	0	0	0	0	0	0	0	0	0	0	0	0
ENSG00000081853_PCDHGA2	0	0	0	0	0	16	0	3	0	0	0	0	0	0	0	0	0	0	0	0	0	0	0	0	0	0	0	0	0	0	1	0	0	0	0	0	0	0	0	0	0	0	0	0	0	0	0	2	0
ENSG00000081870_HSPB11	209	333	341	511	124	154	483	35	323	46	437	124	23	218	88	84	228	195	202	228	201	117	123	247	165	552	298	171	208	172	294	373	184	170	127	236	307	140	222	353	185	234	311	142	195	193	81	192	191
ENSG00000081913_PHLPP1	236	101	105	98	141	257	190	179	190	214	282	93	140	108	155	207	225	167	92	28	235	188	114	239	246	266	393	199	185	189	198	264	185	233	224	216	147	244	200	71	178	136	170	173	231	254	233	199	176
ENSG00000081923_ATP8B1	0	11	1	15	0	3	1	0	31	2	25	0	45	0	5	0	37	0	0	0	22	10	0	7	0	33	25	2	22	11	16	25	12	2	0	28	16	4	30	0	3	0	21	0	0	7	9	26	6
ENSG00000081985_IL12RB2	9	0	0	140	41	1	0	59	133	0	87	2	20	0	107	174	0	4	0	0	33	6	0	150	0	1516	518	177	68	146	32	405	21	5	0	28	2	3	0	22	11	4	21	8	3	5	1	9	0
ENSG00000082014_SMARCD3	0	0	56	0	0	60	15	1	0	0	20	0	0	0	14	20	0	0	0	5	2	0	19	22	0	57	80	68	25	62	17	68	5	0	0	0	0	3	0	0	0	2	5	2	21	12	2	0	0
ENSG00000082068_WDR70	70	59	242	52	31	9	0	28	206	56	112	21	11	19	77	185	44	14	17	24	34	39	47	163	45	688	423	98	126	215	248	546	86	20	70	38	42	74	46	0	48	22	113	43	75	43	19	31	24
ENSG00000082074_FYB	39112	31247	19841	15979	30565	16603	26988	16996	48671	29701	40614	27833	27926	39217	31468	32458	43960	34114	19720	25100	33169	40116	13044	28452	15342	23336	28704	34986	36032	44730	27110	32940	50420	36371	41829	40378	48924	34636	39947	23175	33253	26178	33093	32530	42420	43331	16443	33754	38591
ENSG00000082126_MPP4	0	0	0	0	0	0	0	2	0	0	0	0	0	0	0	0	0	0	0	0	0	0	0	2	0	0	2	0	0	0	0	0	0	0	0	0	0	0	0	0	0	0	2	0	0	0	0	0	0
ENSG00000082146_STRADB	1697	674	1367	652	965	521	1330	1074	975	1415	2653	1231	1029	1251	1068	5224	2235	1748	1015	771	966	1145	391	2071	2538	2800	10410	4087	3836	3065	1798	2642	930	1113	1888	1195	1159	1049	946	726	1097	1302	1182	1532	1452	954	378	1182	1143
ENSG00000082153_BZW1	1371	849	1217	1025	760	650	1277	469	1213	763	1596	921	755	849	952	616	1269	681	622	743	853	743	550	1373	381	1933	1638	1112	1008	999	1234	1697	1061	885	1080	1216	1089	745	1110	877	916	692	1079	868	1121	768	416	750	821
ENSG00000082175_PGR	0	0	0	0	0	5	0	4	0	0	0	0	0	0	0	0	0	0	0	0	0	0	0	1	0	0	0	0	0	0	0	0	0	0	0	0	0	0	0	0	0	0	0	0	0	0	0	0	0
ENSG00000082196_C1QTNF3	2	0	0	0	0	19	0	0	8	2	0	3	15	0	0	0	2	0	0	2	3	10	0	14	0	20	20	4	9	14	5	13	7	0	3	0	2	0	11	0	9	18	1	7	5	10	0	3	10
ENSG00000082212_ME2	846	828	531	380	783	425	535	469	1175	970	1181	764	711	808	818	748	970	1020	489	568	1086	1010	504	1048	166	1292	1320	1079	1144	946	1241	1155	974	1073	1152	970	1232	1045	960	313	860	748	1001	826	1285	979	649	935	1083
ENSG00000082213_C5orf22	299	149	26	69	200	20	31	81	287	67	245	131	129	217	102	194	140	180	91	50	93	104	77	113	107	315	238	154	174	177	365	244	218	166	102	163	167	99	249	59	107	108	156	82	168	168	34	128	188
ENSG00000082258_CCNT2	67	133	213	23	58	110	200	16	233	61	235	79	89	137	137	130	47	217	22	18	107	67	144	236	52	846	637	226	156	266	168	651	148	175	166	201	69	173	85	23	158	80	94	57	181	194	64	90	84
ENSG00000082269_FAM135A	68	12	102	19	86	18	6	114	68	83	35	68	48	26	94	33	64	47	5	5	63	99	52	104	0	169	175	61	54	88	148	201	73	80	101	126	35	232	45	0	50	54	82	60	98	114	37	101	89
ENSG00000082293_COL19A1	0	0	1	3	0	0	2	2	5	0	31	0	0	0	0	0	0	0	0	0	0	0	0	0	0	2	29	2	13	8	1	2	3	0	1	0	0	0	11	0	0	0	0	0	0	0	0	0	0
ENSG00000082397_EPB41L3	2920	722	2274	955	1313	899	5327	924	5365	1371	2083	3616	2166	6182	3590	3533	4071	3595	2158	3221	8292	4535	1735	3199	1884	2803	2756	7640	7873	3628	2697	3720	7701	1794	6206	3055	5789	1539	6090	1617	2415	3821	5348	5672	4003	4726	784	4454	6010
ENSG00000082438_COBLL1	14	16	5	44	8	54	3	16	45	9	65	4	20	14	18	38	14	41	7	0	15	16	37	34	0	78	278	66	47	60	10	64	26	18	25	35	36	34	14	9	32	0	21	6	15	42	11	36	26
ENSG00000082458_DLG3	33	17	2	1	23	10	15	27	41	0	47	0	27	1	33	4	8	0	0	4	12	8	48	28	0	253	44	20	22	28	87	211	37	6	9	3	4	17	23	14	23	30	1	13	5	15	0	3	14
ENSG00000082482_KCNK2	0	0	0	0	0	0	0	0	0	0	0	0	0	0	0	0	0	0	0	0	0	0	0	0	0	0	0	0	0	0	0	0	0	0	0	0	0	0	0	0	0	0	0	0	0	0	0	0	0
ENSG00000082497_SERTAD4	0	0	0	0	0	14	0	0	0	0	0	0	0	0	0	0	0	0	0	0	0	0	0	0	0	4	0	0	0	0	1	0	0	0	0	0	0	0	6	0	0	0	0	0	0	0	0	0	0
ENSG00000082512_TRAF5	31	47	5	19	41	0	1	8	123	3	76	1	4	0	82	82	4	10	118	0	14	11	0	112	0	737	404	91	78	143	254	408	59	18	0	0	0	46	4	12	44	8	28	9	9	29	10	12	25
ENSG00000082515_MRPL22	120	111	0	119	17	148	120	46	79	166	91	38	115	56	58	125	94	145	46	97	91	93	80	85	0	192	147	120	113	81	104	214	95	104	122	83	80	104	61	113	87	92	86	55	100	54	54	106	82
ENSG00000082516_GEMIN5	74	19	102	11	29	12	23	57	101	0	40	14	22	13	43	49	30	39	39	34	33	81	0	95	6	360	197	57	51	96	129	347	79	17	25	67	18	49	3	10	38	0	33	12	30	46	7	18	4
ENSG00000082556_OPRK1	0	0	0	0	0	3	0	0	0	0	0	0	0	0	0	0	0	0	0	0	0	0	0	0	0	0	0	0	0	0	0	0	0	0	0	0	0	0	0	0	0	0	0	0	0	0	0	0	0
ENSG00000082641_NFE2L1	221	37	61	56	222	184	105	78	232	46	242	62	141	61	180	64	123	100	15	160	81	102	98	222	77	831	538	203	144	270	293	482	214	67	101	105	141	122	66	42	156	150	93	101	143	103	134	88	130
ENSG00000082684_SEMA5B	0	0	0	0	0	0	0	0	0	0	0	0	16	0	0	0	0	1	0	0	0	0	0	0	0	0	0	0	0	1	0	0	0	0	0	0	0	0	0	0	0	0	0	0	0	7	0	0	0
ENSG00000082701_GSK3B	3281	1689	1304	1204	2269	731	1226	1589	3238	2901	3170	2778	2077	2986	2555	2100	3068	2362	1356	1515	2286	2329	890	2852	1010	2735	2933	3218	2677	2399	2419	2987	2859	2519	3806	3040	3578	3170	2537	1167	2760	1818	3065	2479	2821	3069	2002	2746	3090
ENSG00000082781_ITGB5	15625	8499	7289	3474	19195	6189	11200	14726	21108	15266	23167	13860	11750	15837	17577	13333	19175	10471	6424	8695	13925	15225	6283	11925	5956	6602	8373	17128	18604	16122	16106	9254	19003	13661	15351	16837	16016	17858	19616	7534	11992	12150	20385	13704	18847	14869	8001	12097	15645
ENSG00000082805_ERC1	599	336	203	130	436	120	201	405	917	713	677	500	381	500	470	627	653	587	266	287	586	646	319	645	108	760	661	553	757	620	555	642	803	775	829	607	662	668	658	234	516	485	655	714	667	787	459	784	584
ENSG00000082898_XPO1	3672	2201	1837	1004	2584	1294	1630	1489	4198	3174	4428	3580	2350	2996	3191	2865	3936	2947	1195	1030	2889	3172	1024	3877	1283	4505	4084	3787	3414	3105	3711	4941	3553	3863	5322	4517	4372	5296	3292	1285	3727	2600	4437	2969	4050	4641	1412	4191	3178
ENSG00000082929_C4orf6	0	0	0	0	0	0	0	0	0	0	0	0	0	0	0	0	0	0	0	0	0	0	0	0	0	0	0	0	0	0	0	0	0	0	0	0	0	0	0	0	0	0	0	0	0	0	0	0	0
ENSG00000082996_RNF13	1629	802	794	1172	1597	1039	1003	970	2732	2115	2201	1858	1205	2155	1822	1352	1732	1911	632	778	1740	1699	1035	2188	1125	1829	2733	1907	1710	1434	1634	2135	1984	2726	2675	2601	1975	3153	2059	1022	1966	1275	2397	1485	2384	3207	1495	2106	2080
ENSG00000083067_TRPM3	0	0	0	0	0	6	0	2	0	0	0	0	0	0	2	0	0	10	0	0	0	0	0	0	0	0	0	9	0	1	0	0	0	6	2	0	0	2	0	0	1	0	6	0	7	6	1	0	12
ENSG00000083093_PALB2	100	37	14	50	86	78	18	26	179	138	254	40	88	63	142	84	81	112	1	69	144	109	62	227	152	566	357	117	200	245	251	429	172	104	108	110	88	205	120	15	99	82	106	87	172	216	75	158	146
ENSG00000083097_DOPEY1	146	84	68	108	79	59	126	134	354	190	235	160	123	146	177	193	97	91	11	17	114	75	32	308	5	1223	750	223	187	428	286	1093	221	163	149	228	116	287	190	65	159	34	199	114	165	224	118	168	125
ENSG00000083099_LYRM2	21	37	14	6	0	9	0	0	8	0	7	10	0	9	6	0	11	11	76	3	4	10	20	13	0	61	51	20	15	14	41	40	27	14	0	9	11	16	4	13	5	1	15	13	5	16	0	2	10
ENSG00000083123_BCKDHB	35	1	110	129	105	34	99	135	191	46	93	70	74	69	63	114	78	83	0	0	72	143	0	135	0	511	232	64	89	104	68	339	97	85	117	87	91	54	84	38	118	6	98	73	74	95	43	79	25
ENSG00000083168_KAT6A	8607	3484	2557	2454	5080	2976	3591	4431	7417	5561	8390	5323	3787	5913	5550	4756	7599	4166	2723	5709	4352	6639	2884	5722	3213	8111	9735	9458	5852	7680	5998	8264	7079	5087	7108	8344	10616	5670	5107	3787	6745	3778	5057	4507	6383	7781	4108	4459	5160
ENSG00000083223_ZCCHC6	2826	1382	1731	1295	1554	750	1343	1314	2742	2041	3319	1514	1430	2143	2104	1902	2345	2421	885	953	1995	2717	823	2522	1131	4550	7841	4113	2804	2428	2809	4014	2992	3234	2988	2439	3027	2719	2488	1024	2286	1491	2247	2007	2784	2941	1288	2353	2204
ENSG00000083290_ULK2	162	107	101	0	48	49	112	60	198	148	160	80	72	93	113	87	116	64	55	66	85	125	30	114	0	349	141	114	120	119	137	175	93	107	75	96	117	140	69	53	82	25	141	104	136	178	38	128	116
ENSG00000083307_GRHL2	0	4	5	2	0	5	1	1	3	0	0	0	0	0	0	0	0	0	0	0	0	2	0	0	0	0	0	0	0	0	0	1	0	0	0	0	0	0	0	0	0	0	0	13	0	0	0	0	0
ENSG00000083312_TNPO1	5241	4093	1782	1015	5036	1434	3048	2814	6629	4174	5595	5220	3664	4445	5019	5431	5749	3132	1514	1767	6978	4688	1504	5048	2894	3022	4643	5129	5989	6601	4656	4346	5616	5684	5293	6154	3128	3949	6660	2014	3554	3609	8966	4103	4448	5273	2163	6256	4170
ENSG00000083444_PLOD1	893	747	560	143	951	396	392	416	1655	281	857	401	427	520	823	897	677	468	243	286	765	796	270	693	239	2922	803	885	622	810	1543	1538	959	400	419	645	1058	364	583	161	505	287	590	459	757	414	177	593	333
ENSG00000083454_P2RX5	0	0	1	0	0	3	1	2	6	0	47	3	0	0	1	14	0	0	0	0	0	0	0	6	0	79	85	48	37	39	34	38	3	0	0	3	8	5	0	0	0	0	0	0	3	3	19	0	0
ENSG00000083457_ITGAE	148	80	444	21	94	91	420	11	45	18	180	41	72	67	15	162	100	128	90	29	46	33	171	34	32	166	65	31	179	39	38	144	275	34	78	35	141	62	141	28	18	9	25	34	179	140	18	106	5
ENSG00000083520_DIS3	122	149	48	107	50	104	41	44	266	122	238	89	64	140	105	211	153	78	92	64	149	160	66	246	65	889	736	253	203	392	358	760	191	144	172	131	119	220	86	16	111	24	125	98	246	234	120	145	161
ENSG00000083535_PIBF1	110	166	217	70	174	96	194	169	455	411	183	298	136	264	249	157	211	277	123	206	302	220	87	328	70	661	437	246	261	339	255	582	300	352	712	295	275	695	239	136	192	183	316	182	345	330	100	367	269
ENSG00000083544_TDRD3	557	328	448	97	623	324	541	301	1052	677	1043	713	669	675	699	463	691	904	167	308	939	719	249	855	214	788	583	737	779	654	747	936	905	1203	1152	1110	875	1208	1023	435	587	530	1012	655	836	840	867	1130	761
ENSG00000083622_AC000111	0	0	0	0	0	0	0	0	0	0	0	0	0	0	0	0	0	0	0	0	0	0	0	0	0	0	0	0	0	0	0	0	0	0	0	0	0	0	0	0	0	0	0	0	0	0	0	0	0
ENSG00000083635_NUFIP1	3	0	43	14	23	76	54	9	16	18	3	23	27	32	4	11	11	12	0	16	19	36	37	33	0	97	43	23	24	23	20	67	39	38	12	25	7	14	11	2	29	35	4	13	28	32	58	30	15
ENSG00000083642_PDS5B	2086	1465	959	1200	1542	1066	879	943	2074	1405	2298	1431	1104	1619	1691	1395	2226	1627	658	1230	1214	1606	815	2316	1078	3067	2571	2134	1888	1813	1972	3094	1957	1830	2594	1813	2570	2168	1925	961	2123	1047	1706	1555	2007	2265	817	1495	1878
ENSG00000083720_OXCT1	300	176	94	58	241	70	204	36	534	249	290	314	106	225	246	186	399	275	31	76	337	312	18	432	212	778	305	258	308	339	495	555	457	603	423	329	327	519	318	20	253	215	386	333	384	487	207	464	325
ENSG00000083750_RRAGB	37	17	0	55	1	2	0	41	48	52	84	20	32	21	9	52	17	56	0	18	40	31	0	42	62	88	96	57	26	38	12	63	32	40	32	34	37	24	18	0	25	29	43	21	45	22	14	34	37
ENSG00000083782_EPYC	0	0	0	0	0	1	0	0	0	0	0	0	0	0	0	0	0	0	0	0	0	0	0	0	0	0	0	0	0	0	0	0	0	0	0	0	0	0	0	0	0	0	0	0	0	0	0	0	0
ENSG00000083799_CYLD	953	584	521	449	837	129	623	754	1318	473	1589	604	472	770	871	976	877	761	276	240	645	778	485	853	314	3514	3369	1354	1167	1631	1676	2493	1360	791	642	532	1767	984	847	281	855	434	923	567	984	942	308	646	781
ENSG00000083807_SLC27A5	0	1	0	0	6	5	0	2	2	0	7	0	0	1	0	0	0	0	3	0	0	0	0	3	0	21	4	0	0	2	5	15	1	0	0	0	0	1	1	0	0	0	0	0	1	0	0	0	0
ENSG00000083812_ZNF324	5	12	11	0	0	5	1	2	14	3	5	7	0	0	31	7	0	0	0	0	2	0	0	29	18	118	113	36	10	29	17	99	2	0	0	0	0	28	0	2	2	3	14	2	4	15	1	0	1
ENSG00000083814_ZNF671	0	15	12	0	4	2	0	5	58	0	43	1	24	0	15	18	7	3	0	0	14	3	0	49	0	129	103	7	23	28	24	112	9	2	4	0	13	24	0	0	1	5	12	7	0	7	2	5	1
ENSG00000083817_ZNF416	6	0	0	0	10	6	6	0	27	0	1	0	0	0	5	5	0	0	0	0	0	0	0	7	0	75	18	2	2	13	15	73	9	0	0	6	1	1	0	0	0	0	0	0	1	0	3	0	0
ENSG00000083828_ZNF586	409	518	425	373	226	194	106	70	283	245	273	370	433	196	235	334	240	390	267	195	388	230	279	304	205	495	824	488	353	344	355	457	352	536	288	425	250	377	490	260	152	629	247	299	226	310	69	283	332
ENSG00000083838_ZNF446	2	0	0	0	10	3	12	2	5	0	11	7	0	1	1	5	0	0	0	0	5	0	0	13	0	44	34	14	2	8	18	40	4	0	0	2	1	4	0	0	0	5	5	8	0	17	0	0	0
ENSG00000083842_ZNF8	4	3	7	0	3	8	0	5	7	0	4	2	1	0	2	1	3	2	2	1	2	1	0	5	2	2	0	0	4	4	3	0	2	2	2	1	2	0	2	0	2	0	1	1	3	2	1	2	4
ENSG00000083844_ZNF264	48	137	59	13	80	55	13	32	166	19	163	79	4	20	97	80	20	20	79	18	23	9	31	197	0	656	440	104	88	173	222	605	109	27	33	25	41	61	24	51	42	132	177	59	52	32	0	55	29
ENSG00000083845_RPS5	298	505	1431	231	346	270	409	75	986	222	636	88	191	149	171	510	189	274	428	180	263	170	290	795	142	3150	1550	437	501	698	1010	1849	370	71	211	193	245	350	158	119	222	409	356	174	261	259	165	198	216
ENSG00000083857_FAT1	14	13	20	11	0	88	11	8	30	0	1	0	1	4	1	7	0	0	0	0	0	10	0	4	38	9	51	5	17	5	84	16	0	0	0	0	0	0	0	0	0	0	4	5	0	0	53	0	1
ENSG00000083896_YTHDC1	893	498	648	319	658	212	282	254	953	427	1187	287	321	407	688	619	341	499	234	541	391	709	262	1249	420	3758	3316	1338	703	1168	1557	2451	793	505	729	643	862	721	355	403	630	548	793	427	793	632	233	291	290
ENSG00000083937_CHMP2B	88	22	36	174	119	14	38	44	120	88	183	68	137	98	79	45	139	102	95	139	137	112	62	95	48	182	229	128	129	167	117	176	154	152	116	142	159	88	119	110	76	51	78	94	132	109	21	147	118
ENSG00000084070_SMAP2	626	190	288	897	607	121	335	421	647	359	747	204	329	290	365	892	418	397	261	182	359	297	177	1237	198	2489	5559	1850	454	991	829	1018	627	209	414	351	438	490	323	30	565	169	253	398	583	423	161	211	306
ENSG00000084072_PPIE	637	841	717	544	847	871	995	538	581	555	888	629	987	734	845	277	745	820	445	729	581	727	801	1067	80	976	622	614	940	563	653	975	868	702	742	1235	938	980	1082	703	923	589	1152	777	1582	656	476	878	850
ENSG00000084073_ZMPSTE24	1534	853	272	594	1084	365	1054	599	1210	757	1632	647	803	1155	973	858	1270	1251	479	383	1270	1368	506	810	555	933	1015	720	1004	1114	834	1098	1745	1108	1215	808	1773	1033	1775	503	1283	532	940	1175	1765	1296	414	1224	1174
ENSG00000084090_STARD7	241	11	14	129	183	53	146	106	269	72	248	57	69	92	174	298	205	115	68	108	305	155	119	337	60	1181	537	205	230	458	628	823	238	120	130	169	255	110	173	79	171	177	271	105	393	311	44	139	140
ENSG00000084092_NOA1	18	27	55	3	54	13	15	6	150	1	69	4	3	27	40	58	38	2	3	19	19	28	78	98	33	417	218	71	32	72	148	169	23	16	26	26	36	53	45	2	22	20	27	27	28	17	71	24	0
ENSG00000084093_REST	1149	503	224	480	849	114	631	507	963	408	1312	717	594	511	889	715	971	624	233	346	625	591	299	1117	324	1588	1488	1063	877	1011	946	1372	729	500	753	722	951	807	732	399	737	713	772	701	649	645	400	718	826
ENSG00000084110_HAL	0	64	110	45	0	2	0	1	6	19	2	11	0	0	1	180	11	9	158	0	1	1	0	223	0	576	1698	793	52	130	170	20	131	0	21	8	23	8	0	0	8	3	0	10	5	40	0	7	0
ENSG00000084112_SSH1	2993	949	508	504	2480	1069	936	1554	4314	1855	3831	2967	1878	2729	2632	2063	3448	2312	867	1184	2430	2944	1213	1345	1245	2120	2004	2920	2439	2629	2518	2227	4040	2235	2245	2788	2547	1956	3286	1138	1926	1550	3008	2576	1920	2393	1528	2476	2357
ENSG00000084207_GSTP1	141	194	361	311	207	223	175	201	412	64	593	117	88	192	158	252	226	155	246	126	197	99	117	395	294	1062	572	169	271	425	453	726	314	79	131	106	202	174	124	126	153	282	169	189	312	174	58	191	142
ENSG00000084234_APLP2	344	485	977	614	436	419	287	348	1464	446	740	460	435	618	345	1269	478	441	205	136	585	577	90	1431	429	2821	4788	1668	941	1995	1179	2269	981	341	457	577	618	800	742	342	616	244	429	520	636	666	381	615	539
ENSG00000084444_KIAA1467	7	0	64	10	4	26	5	0	37	0	4	0	0	0	0	0	15	2	0	0	2	0	35	14	0	33	35	5	48	11	0	43	17	0	0	0	0	4	6	0	3	0	0	0	0	0	0	0	11
ENSG00000084453_SLCO1A2	0	0	0	0	0	0	0	0	0	0	0	0	0	0	0	0	0	0	0	0	0	0	0	0	0	0	1	0	0	0	0	0	0	0	0	0	0	0	0	0	0	0	0	0	0	0	0	0	0
ENSG00000084463_WBP11	788	379	210	309	430	124	457	224	532	455	821	378	422	667	559	495	963	593	298	338	389	490	339	669	341	960	890	405	503	609	647	791	628	495	566	461	748	631	637	428	515	444	517	468	504	627	410	493	815
ENSG00000084623_EIF3I	145	111	143	154	95	214	78	11	184	18	290	27	174	10	60	75	100	72	164	19	86	75	117	201	117	678	314	128	103	190	250	377	128	53	86	48	109	113	72	36	89	35	111	61	138	67	3	63	62
ENSG00000084628_NKAIN1	0	0	0	0	0	2	0	0	0	0	0	0	0	0	0	0	0	0	0	0	0	0	0	0	0	0	0	0	3	0	0	0	0	0	0	0	0	0	0	0	0	0	0	0	0	0	0	0	0
ENSG00000084636_COL16A1	0	1	6	0	0	2	1	1	1	0	0	4	0	0	0	0	0	0	0	0	0	0	0	2	0	4	0	1	7	0	0	0	0	0	0	0	0	0	0	0	0	0	0	0	0	2	0	0	0
ENSG00000084652_TXLNA	112	51	14	25	73	90	4	89	130	48	180	38	86	54	65	79	53	32	48	21	33	32	21	127	59	396	168	74	112	122	136	256	80	59	64	86	61	50	60	53	51	60	73	47	61	56	44	42	38
ENSG00000084674_APOB	0	0	0	0	0	19	0	7	0	0	0	0	0	0	0	0	0	0	0	0	0	0	0	0	1	0	0	0	0	0	0	0	0	0	0	0	0	0	0	0	0	0	0	0	0	0	2	0	0
ENSG00000084676_NCOA1	5775	1846	1558	926	4061	835	2013	2689	4723	2879	6111	3783	2699	3678	3807	3530	5310	3053	1251	1207	3400	3983	817	4071	1916	5075	6722	6341	4067	4120	4162	4692	4726	3346	5051	3686	4764	3855	4308	1038	4030	2022	5158	3622	3778	4364	2337	3798	4273
ENSG00000084693_AGBL5	1506	552	609	289	1425	653	715	1034	1577	1166	1913	870	919	1202	1003	1050	1637	1079	494	644	1216	1030	642	1351	513	823	716	1175	1154	1021	944	917	1128	1200	1280	1209	1242	1124	1356	460	1133	1022	1095	1169	1189	1090	634	1007	1050
ENSG00000084710_EFR3B	0	0	0	0	9	1	0	0	2	0	0	0	0	0	8	7	0	0	0	0	0	0	26	4	0	1	0	0	2	2	0	0	3	0	0	21	0	0	0	0	1	0	7	0	0	0	0	0	0
ENSG00000084731_KIF3C	3560	1032	1235	498	2470	863	2020	1449	3614	2464	3820	1732	2044	2076	2632	2164	2757	1962	996	1672	2471	2356	1153	1928	1173	1256	1322	2550	2850	1881	1545	1224	3153	2156	2388	1860	1390	2521	1922	859	1989	1910	2322	3274	2131	1752	833	2399	2540
ENSG00000084733_RAB10	4386	2869	1942	2086	3657	2716	2563	1510	4171	2607	4702	2969	3690	4307	2776	2178	4996	3656	2514	2749	2602	3956	1477	3851	1417	2683	2678	3784	4591	3568	2222	3279	4703	3875	4158	3772	5519	2555	4945	3327	3945	2705	3133	2988	4720	3987	1541	3538	3981
ENSG00000084734_GCKR	26	34	0	0	203	2	49	255	61	45	49	55	73	28	11	177	68	51	79	52	70	15	104	28	8	31	10	70	55	63	85	19	29	33	9	78	314	28	18	19	56	8	107	26	16	67	8	83	96
ENSG00000084754_HADHA	1849	614	764	914	1004	592	773	550	1578	417	1934	679	488	616	881	961	1132	574	443	552	850	755	520	1783	389	3223	2826	1191	1194	1788	1785	3032	1476	632	550	810	877	899	689	253	730	881	1218	895	1006	839	462	738	453
ENSG00000084764_MAPRE3	4	22	0	9	3	3	0	0	11	12	7	4	0	10	0	8	10	1	0	0	5	0	0	5	0	20	22	24	22	11	11	11	6	2	0	7	4	0	2	0	5	19	20	0	7	2	12	8	14
ENSG00000084774_CAD	55	43	17	22	109	33	2	4	184	5	62	13	14	35	8	49	26	5	0	9	17	8	1	94	6	638	405	97	63	98	195	480	63	12	21	40	1	22	1	0	33	21	50	10	4	58	12	14	10
ENSG00000085063_CD59	378	343	280	463	575	1197	1081	321	306	391	1451	132	117	356	267	509	533	102	859	330	497	489	221	472	214	574	984	412	310	522	711	597	403	445	508	334	393	320	541	115	118	406	707	613	341	375	214	418	538
ENSG00000085117_CD82	4445	5407	4046	1665	6327	4841	5430	2392	10571	3284	6777	3826	4391	3762	3996	2252	3239	3850	4882	4000	4103	2776	5568	2410	1608	2115	2167	4636	2672	1989	5202	2426	4860	5669	4800	5640	3119	4097	4857	2547	3414	2470	4221	3390	3746	5001	2487	4086	4490
ENSG00000085185_BCORL1	246	67	123	120	126	68	126	249	380	178	323	128	293	258	196	359	360	162	68	40	286	236	83	300	14	345	406	339	217	276	131	385	311	157	212	145	298	201	206	114	234	174	272	202	234	160	119	172	206
ENSG00000085224_ATRX	2182	2083	1642	1145	2090	773	1666	1798	3820	2623	4133	2253	2734	4170	3183	2634	3000	3220	1837	2326	2837	3160	1796	3666	1391	7620	6317	4362	4156	3730	3808	7162	5057	4036	3840	3485	5566	3965	3611	1603	2705	2544	3213	2146	4215	3312	1485	3797	4106
ENSG00000085231_TAF9	103	72	73	81	49	25	25	19	117	65	190	39	35	201	54	59	80	125	30	43	86	62	92	143	76	239	122	118	165	128	101	230	99	113	69	103	206	43	108	92	76	175	66	104	107	89	32	78	95
ENSG00000085265_FCN1	0	427	2004	432	19	0	40	0	30	11	196	31	0	8	12	1004	15	16	343	43	10	24	16	1065	0	469	2119	1081	761	1673	276	1029	140	5	0	160	20	34	4	19	29	62	80	50	244	356	8	6	0
ENSG00000085274_MYNN	42	113	1	31	37	5	1	44	124	0	106	15	3	28	39	39	17	23	11	11	23	32	0	120	37	504	367	107	76	152	130	380	67	7	20	16	53	52	4	23	36	25	40	19	50	44	37	30	30
ENSG00000085276_MECOM	17	18	27	4	3	95	71	0	25	23	74	18	56	29	33	8	37	32	0	25	12	20	9	18	0	13	29	20	15	12	42	13	19	20	21	45	41	28	38	5	9	8	31	9	4	54	11	16	20
ENSG00000085365_SCAMP1	1057	365	122	672	540	237	477	374	787	646	1055	563	803	755	608	404	889	746	532	463	624	563	377	664	237	822	563	588	755	605	616	701	738	887	860	933	944	710	802	437	801	278	368	689	616	567	394	779	793
ENSG00000085377_PREP	94	32	131	103	112	112	9	66	286	97	196	52	90	103	122	143	94	145	36	12	91	73	0	259	55	1117	487	127	188	306	451	709	176	98	74	40	92	128	104	66	79	141	90	103	137	112	66	91	58
ENSG00000085382_HACE1	414	228	227	63	336	171	283	306	629	137	419	287	466	503	273	436	365	299	50	222	292	399	171	450	182	681	508	477	491	485	463	680	463	589	423	466	418	484	543	212	399	244	386	379	537	559	319	364	560
ENSG00000085415_SEH1L	12	54	6	101	17	54	0	22	100	38	110	14	25	29	41	44	27	8	89	15	23	58	10	84	0	237	133	43	37	79	99	196	55	47	81	43	50	58	33	16	18	32	32	49	64	53	11	18	38
ENSG00000085433_WDR47	122	113	156	48	138	111	159	92	374	111	248	115	172	209	180	173	209	146	18	103	174	172	110	227	22	498	395	247	195	204	274	369	229	265	395	288	193	397	217	76	186	60	220	185	285	286	124	178	146
ENSG00000085449_WDFY1	1208	640	1512	606	969	299	566	883	1479	1272	1806	1322	835	1210	1138	891	1597	988	748	917	932	1450	870	1110	533	1038	1133	1349	1374	941	1092	1272	1201	1357	1734	1076	1334	1281	937	550	923	1026	1356	1178	1164	1304	840	1148	1272
ENSG00000085465_OVGP1	6	0	0	0	0	1	0	0	0	0	7	0	2	0	8	0	0	0	0	0	1	0	0	6	0	9	4	9	1	2	0	3	1	0	0	0	0	13	3	0	0	0	4	0	0	12	0	0	0
ENSG00000085491_SLC25A24	85	68	62	83	23	13	28	144	233	82	133	22	167	126	112	121	37	220	16	70	89	136	16	196	0	391	246	98	115	126	229	247	124	122	68	84	205	195	149	68	136	87	124	74	126	121	40	89	162
ENSG00000085511_MAP3K4	38	124	72	10	206	23	21	42	306	51	266	20	100	57	133	92	99	79	5	14	89	73	33	278	41	1028	465	178	140	207	373	774	185	64	72	124	39	125	75	32	104	57	114	60	76	73	8	47	55
ENSG00000085514_PILRA	1	77	344	197	0	4	12	2	3	0	62	3	0	0	47	306	3	7	124	19	12	6	0	287	0	616	2949	801	150	282	242	183	139	14	4	7	1	33	0	0	16	60	29	8	48	89	3	0	0
ENSG00000085552_IGSF9	0	0	4	0	0	4	0	1	0	0	0	0	0	0	0	0	2	0	0	0	0	0	0	0	0	5	3	0	0	5	0	0	0	0	0	1	1	0	0	0	0	0	2	0	0	0	0	0	0
ENSG00000085563_ABCB1	49	25	187	133	37	1	18	28	666	20	461	0	2	35	262	179	34	10	49	0	91	11	9	501	3	3419	1046	319	246	569	944	2589	341	0	11	44	26	247	16	33	146	63	161	18	115	85	27	8	0
ENSG00000085644_ZNF213	15	0	65	14	14	2	30	30	27	13	36	18	5	44	16	41	70	17	15	6	22	40	0	16	16	50	62	33	35	49	43	53	32	15	15	19	16	14	45	21	23	8	37	18	47	22	1	23	1
ENSG00000085662_AKR1B1	259	328	277	109	750	187	17	54	525	182	589	134	61	129	198	171	244	165	79	244	213	273	94	398	72	1121	425	167	254	489	719	861	384	193	179	222	95	328	319	90	299	190	258	244	277	189	190	255	144
ENSG00000085719_CPNE3	268	163	289	406	211	201	44	144	394	109	390	167	197	259	281	509	238	277	83	163	180	255	148	410	231	897	1181	297	286	460	608	796	316	330	257	403	283	357	257	127	306	238	295	248	203	332	231	283	242
ENSG00000085721_RRN3	286	96	350	20	66	86	7	20	325	177	209	82	131	135	104	154	123	168	0	40	170	173	33	270	9	1140	532	287	191	203	538	901	168	180	152	168	277	289	76	32	242	71	230	131	240	191	3	213	31
ENSG00000085733_CTTN	65191	44329	30478	20134	65874	25800	43277	49378	78958	40441	84247	51938	49426	49912	51306	38945	65189	54029	28726	39982	46232	61520	33952	43392	26581	31325	36679	60095	83562	61003	43686	40294	74143	59304	74955	67968	58549	52135	75810	35093	54143	48952	58373	59265	64529	60346	28440	51203	60114
ENSG00000085741_WNT11	91	14	88	14	75	35	16	29	50	56	30	21	23	133	64	30	74	45	8	114	32	45	33	59	52	33	23	34	52	31	21	34	45	34	83	49	53	100	29	38	59	35	45	39	45	61	13	72	20
ENSG00000085760_MTIF2	42	81	71	11	39	151	0	0	92	15	103	50	35	20	33	73	34	43	57	2	45	58	115	150	0	467	311	85	83	79	139	323	74	69	51	56	37	96	16	10	72	8	63	43	76	105	23	70	45
ENSG00000085788_DDHD2	306	145	232	130	326	101	121	137	479	213	459	181	276	243	295	141	310	360	288	188	309	291	301	365	204	814	550	334	343	343	513	694	371	306	431	310	318	389	324	95	242	269	346	310	172	224	131	341	334
ENSG00000085831_TTC39A	2	0	3	0	0	3	0	0	0	0	0	2	0	0	0	0	0	0	0	0	4	0	0	10	0	13	30	6	1	1	5	0	1	2	0	3	0	0	0	0	0	1	9	0	10	0	0	6	0
ENSG00000085832_EPS15	8246	3122	3786	2834	6434	3685	4256	4392	9031	6604	9139	7114	4417	8495	6428	6179	9583	7143	2497	4051	6777	7433	2829	7140	3045	5906	4798	8534	7696	7312	6430	7408	7274	7542	9796	7342	8657	8701	6116	2738	7289	4630	8375	6469	8310	8085	3540	7443	7108
ENSG00000085840_ORC1	0	13	38	48	11	11	0	0	66	43	65	33	1	1	22	72	52	29	0	0	20	6	87	45	38	94	55	34	25	41	49	75	52	24	9	32	50	73	11	0	38	128	36	4	19	47	57	30	45
ENSG00000085871_MGST2	375	175	727	62	207	60	111	129	359	327	295	209	195	233	125	170	75	205	261	262	279	200	260	458	70	290	290	218	231	220	378	338	265	474	343	261	261	425	314	253	194	155	310	151	325	412	361	478	181
ENSG00000085872_CHERP	218	81	77	5	134	19	64	71	350	54	305	103	166	105	134	151	239	79	52	105	73	140	13	127	124	373	420	230	161	240	186	333	156	62	166	137	101	100	181	94	127	90	157	137	143	81	121	144	98
ENSG00000085978_ATG16L1	147	142	70	47	129	97	1	179	333	266	358	197	180	202	279	146	119	177	46	92	205	196	25	409	46	859	539	184	234	292	376	693	257	400	314	283	165	410	278	59	183	65	170	108	267	300	263	296	211
ENSG00000085982_USP40	4	12	52	0	27	5	3	5	68	11	90	7	8	6	59	30	9	18	41	0	0	4	0	75	0	256	139	44	43	96	67	180	40	21	30	17	7	24	7	21	19	34	62	10	32	27	36	17	19
ENSG00000085998_POMGNT1	0	20	4	16	36	29	18	2	98	0	17	31	0	2	78	18	0	14	23	0	52	5	8	109	0	699	289	47	62	142	178	522	60	0	0	52	1	82	0	0	4	16	92	4	0	52	0	5	1
ENSG00000085999_RAD54L	0	1	0	34	0	76	0	0	4	22	0	0	0	0	0	0	0	0	0	0	2	0	0	12	0	30	43	4	7	16	6	9	10	0	0	23	4	6	0	4	1	0	0	0	18	0	0	5	0
ENSG00000086015_MAST2	16	25	3	14	35	19	5	2	57	58	7	18	24	4	22	44	38	24	1	21	31	24	6	37	81	380	184	44	75	75	140	292	48	19	43	26	16	70	26	0	13	0	31	8	22	62	7	23	52
ENSG00000086061_DNAJA1	458	273	335	388	283	283	92	457	622	271	879	264	251	381	287	330	351	319	106	358	314	359	387	616	485	1787	2271	821	577	575	916	1344	466	314	326	315	1691	246	309	288	196	293	511	237	540	307	276	251	481
ENSG00000086062_B4GALT1	2132	1054	379	533	1959	594	1120	665	2389	1379	3867	1518	797	1646	1665	1434	2455	1345	976	675	1624	2000	763	1474	813	2456	2287	2390	1867	2263	1533	2354	1945	1630	2056	2012	1623	2091	2184	450	1609	1099	2052	2146	1618	1878	1133	1554	1608
ENSG00000086065_CHMP5	1612	1197	812	1220	1238	758	898	561	1416	837	2645	836	1075	1277	744	748	1178	1174	534	1256	901	972	959	1367	448	1251	1283	844	1137	952	959	1063	1391	1176	1179	1180	1944	1032	1309	1530	1020	690	1138	839	1160	1100	374	1061	973
ENSG00000086102_NFX1	2160	830	724	737	1340	793	989	1447	2207	1440	2796	1548	1494	1626	1038	1021	1839	2046	811	802	1607	1445	893	1700	754	1832	1370	1987	1694	1345	1598	1799	1612	1364	1819	1891	2390	1555	1751	949	1545	1171	1960	1629	1684	1780	1455	1710	1915
ENSG00000086159_AQP6	0	0	0	0	0	2	0	1	0	0	0	0	0	0	0	0	0	0	0	0	0	0	0	0	0	0	0	0	0	0	0	1	0	0	0	0	0	0	0	0	0	0	0	0	0	0	0	0	0
ENSG00000086189_DIMT1	218	208	141	226	273	374	164	142	300	222	339	171	333	416	405	571	628	250	177	168	282	318	92	351	82	433	347	386	463	388	464	408	445	429	408	377	449	372	381	168	335	252	395	262	388	423	243	372	241
ENSG00000086200_IPO11	401	249	418	508	451	362	227	261	496	530	199	576	279	449	533	768	1094	568	599	177	997	912	551	542	134	444	391	253	353	271	740	1538	442	673	1264	973	340	420	400	157	895	365	947	320	820	736	341	853	305
ENSG00000086205_FOLH1	0	0	0	0	0	13	0	0	0	0	0	0	0	0	0	0	0	0	0	0	0	0	0	0	0	0	0	0	0	0	0	0	0	0	0	0	0	0	0	0	0	0	0	0	0	0	0	0	0
ENSG00000086232_EIF2AK1	42650	29657	22326	15468	50126	23417	26931	29593	61031	42981	90244	38633	18868	31985	39947	34520	60287	26099	15492	23225	42094	40105	19572	49562	21555	21948	38079	55813	48230	36856	39386	37236	31328	39350	55377	50036	28838	47914	42826	17424	38525	32882	61731	47103	44981	41200	23119	48568	44207
ENSG00000086288_NME8	3	0	120	39	10	13	0	0	29	0	0	0	5	0	45	35	1	9	35	0	8	0	0	50	0	211	164	62	17	74	29	288	45	0	20	3	0	72	19	0	19	0	4	0	3	9	0	0	0
ENSG00000086289_EPDR1	72	54	74	63	55	78	14	116	110	113	167	92	163	137	49	87	89	130	14	21	157	91	170	55	17	79	43	44	93	89	95	44	122	115	111	100	238	119	111	52	80	32	212	98	57	173	124	153	74
ENSG00000086300_SNX10	16	34	183	66	0	0	0	0	19	19	42	14	0	0	15	70	9	1	91	1	4	6	5	151	0	303	853	323	63	168	88	192	51	8	0	41	14	41	1	0	12	37	20	11	26	16	13	10	1
ENSG00000086475_SEPHS1	70	19	62	37	70	28	32	111	81	41	82	51	31	40	22	38	43	49	0	50	46	36	94	50	56	213	101	68	45	68	118	121	53	110	30	79	48	74	65	22	52	51	76	33	24	44	47	46	49
ENSG00000086504_MRPL28	119	104	87	43	88	88	79	68	84	79	209	68	68	64	91	62	180	54	1	96	62	80	104	129	95	213	143	94	137	102	135	170	87	68	110	108	96	87	103	91	76	112	111	74	154	95	34	81	80
ENSG00000086506_HBQ1	168	351	363	279	190	125	308	185	478	67	289	109	459	258	72	198	113	305	279	179	313	88	588	107	280	154	163	311	273	137	101	140	310	341	171	229	174	142	412	826	222	167	190	113	322	354	43	237	263
ENSG00000086544_ITPKC	11	19	4	30	1	20	2	55	15	12	16	3	0	0	10	11	5	22	52	27	17	13	31	33	0	193	133	49	38	26	57	76	31	14	23	21	28	25	9	0	4	0	17	9	19	22	2	11	5
ENSG00000086548_CEACAM6	48	48	1	264	15	2	0	1	8	0	3	6	0	4	0	139	11	9	0	0	4	0	0	127	0	67	588	18	16	68	5	23	2	2	0	0	0	8	0	0	0	0	5	1	0	0	1	0	0
ENSG00000086570_FAT2	0	22	8	17	0	79	6	7	5	0	2	0	1	1	9	0	0	0	0	0	2	0	0	2	0	15	24	5	5	10	0	14	7	0	0	0	0	0	5	0	0	0	6	0	0	3	19	2	0
ENSG00000086589_RBM22	122	72	197	115	99	56	16	28	154	24	184	98	56	115	105	174	133	69	109	39	77	112	117	189	85	655	508	273	112	162	209	431	130	95	127	100	164	118	74	68	103	36	96	76	94	86	64	68	88
ENSG00000086598_TMED2	618	252	186	119	357	280	522	213	635	362	676	447	372	506	421	224	593	451	320	480	436	431	202	802	88	810	626	440	503	552	537	725	517	539	788	679	580	632	794	416	405	567	444	432	669	522	275	437	500
ENSG00000086619_ERO1LB	212	128	413	84	264	195	12	161	308	160	247	218	149	280	163	151	394	183	56	21	189	306	172	376	0	428	398	290	202	175	263	424	289	228	354	291	308	228	149	148	219	92	161	188	310	355	73	179	212
ENSG00000086666_ZFAND6	3670	2145	1949	1854	3358	1350	2251	1687	4388	3358	4050	3772	2299	3644	3232	2440	3493	3508	1702	2348	3481	3233	1813	4918	1471	2610	2950	3774	3052	2649	2971	3735	2908	4263	5657	4674	3435	5152	4403	1756	3821	2215	4682	2973	4416	4629	3018	4180	4098
ENSG00000086696_HSD17B2	0	0	0	0	0	1	0	1	0	0	0	0	0	0	0	0	0	0	0	0	0	0	0	0	0	0	2	0	0	0	0	0	0	0	0	0	0	0	0	0	0	0	0	0	0	0	0	0	0
ENSG00000086712_TXLNG	25	31	3	20	23	6	4	34	24	1	48	27	8	22	22	16	19	22	77	10	32	20	39	39	21	237	85	39	33	41	41	152	24	24	32	33	24	45	26	11	25	13	37	27	29	34	36	39	42
ENSG00000086717_PPEF1	0	0	0	0	0	0	0	0	1	0	0	0	0	0	0	0	0	0	0	0	0	0	0	3	0	1	9	1	0	3	0	7	0	0	0	0	0	0	0	0	4	0	0	0	0	0	0	0	0
ENSG00000086730_LAT2	59	50	303	45	89	68	24	95	120	93	113	20	50	10	44	130	32	31	69	20	69	26	134	159	17	373	817	278	105	150	203	267	94	59	31	64	33	37	65	8	45	22	62	49	38	41	39	64	33
ENSG00000086758_HUWE1	3312	1057	1636	893	2598	676	1368	1873	4931	2229	4393	2156	1521	1975	2539	3174	3676	2025	685	1003	2324	2241	819	3038	930	10132	6403	3464	3529	4532	4209	7555	3939	1779	1857	2318	2292	2374	2446	756	1943	1808	3488	2182	2592	2224	1378	2370	2174
ENSG00000086827_ZW10	58	23	61	10	39	3	0	3	80	52	63	8	23	44	47	67	46	30	51	1	49	54	0	91	0	310	120	65	48	56	89	179	89	52	88	118	49	111	49	22	64	9	58	33	69	81	39	46	59
ENSG00000086848_ALG9	140	102	1	15	65	7	67	1	180	152	262	82	98	96	76	115	149	88	40	32	118	42	0	83	18	341	196	93	147	97	290	287	123	93	92	108	58	79	166	9	69	63	99	68	136	119	39	72	83
ENSG00000086967_MYBPC2	0	1	0	0	0	1	0	0	0	0	1	0	0	0	0	0	0	0	0	0	0	0	0	0	0	0	1	2	0	0	0	0	1	0	0	0	0	0	0	0	0	0	0	0	0	0	0	0	0
ENSG00000086991_NOX4	0	1	0	0	0	1	0	0	0	0	0	0	0	0	0	0	0	0	0	0	2	0	0	0	0	0	0	0	0	0	0	0	0	0	0	0	0	0	0	0	0	0	0	0	0	0	0	0	0
ENSG00000087008_ACOX3	13	9	1	2	0	3	0	3	66	0	31	1	11	1	21	22	5	7	0	17	9	15	23	28	0	247	120	33	45	75	95	148	36	0	4	16	3	9	11	2	0	47	33	0	0	3	10	20	4
ENSG00000087053_MTMR2	2965	1979	1863	1604	3401	1722	2227	3203	4346	2222	4588	3558	2797	3179	3182	3005	3710	4061	1870	804	4470	2350	1252	2812	1781	1491	1728	3274	4087	2222	2552	2183	5167	4352	2945	2905	3667	2236	3814	997	3515	2825	3606	3763	3660	3679	2818	3615	3540
ENSG00000087074_PPP1R15A	1278	684	452	539	518	811	628	571	1021	504	743	410	364	554	568	583	778	699	565	679	561	548	280	778	311	2201	3229	1992	773	1015	619	665	898	429	640	751	1573	466	463	542	940	294	537	438	595	798	339	516	434
ENSG00000087076_HSD17B14	0	0	0	0	0	2	0	1	0	0	2	0	12	1	0	0	0	0	0	0	6	0	2	0	0	1	0	9	0	0	20	0	2	0	0	2	15	0	0	0	0	0	0	0	0	0	0	3	1
ENSG00000087077_TRIP6	21	10	3	5	4	23	1	6	15	9	9	7	5	14	6	0	26	2	5	8	0	4	6	16	14	17	24	36	13	17	7	20	7	6	12	38	2	9	8	4	25	0	4	8	0	4	15	4	5
ENSG00000087085_ACHE	0	0	1	0	0	3	0	1	2	0	0	2	0	0	0	5	0	2	0	0	0	0	0	1	0	4	10	1	0	3	0	1	0	0	0	1	3	0	0	0	0	0	0	0	0	0	1	0	0
ENSG00000087086_FTL	38291	62736	55266	26585	42522	46079	43910	24148	71327	42192	49597	45472	30023	36121	34067	41371	40688	36416	34091	29915	46604	33750	34228	40241	19340	25499	41282	51021	43655	37776	34041	27018	36089	48308	52393	43703	27254	51015	50606	24617	33411	52496	58518	39113	42181	39383	21347	35924	31749
ENSG00000087087_SRRT	113	66	195	11	94	43	29	44	164	35	122	7	13	25	68	107	37	65	38	17	61	31	48	185	4	1060	547	133	100	225	251	526	117	24	24	30	58	50	42	7	45	17	88	45	46	53	39	32	13
ENSG00000087088_BAX	121	132	103	52	84	109	33	66	99	38	168	80	80	88	81	80	122	98	63	82	69	59	84	90	28	241	111	125	99	79	139	124	125	84	59	51	76	78	120	81	100	84	97	57	78	60	50	56	60
ENSG00000087095_NLK	10325	5013	4416	3516	9714	3574	6574	4426	14347	11634	11713	9567	8367	10856	9415	6148	9255	12616	6194	7748	10868	9709	5588	10524	3316	6428	6667	10348	9662	7858	9425	9919	10973	14254	17214	14107	14175	17276	11628	5306	10648	7631	11713	9637	13113	13889	7206	12926	11615
ENSG00000087111_PIGS	308	228	85	120	290	77	314	232	608	157	426	166	111	215	349	233	268	166	118	70	217	242	204	271	79	600	389	150	253	301	332	409	272	236	177	212	272	194	315	132	237	170	482	305	216	270	127	232	278
ENSG00000087116_ADAMTS2	0	1	3	1	0	3	1	0	1	0	0	0	0	0	0	0	0	0	0	0	0	0	0	0	0	0	0	0	4	16	0	0	3	0	0	0	0	0	0	0	0	0	0	0	0	0	0	0	0
ENSG00000087128_TMPRSS11E	0	0	0	0	0	1	0	0	0	0	0	0	0	0	0	0	0	0	0	0	0	0	0	0	0	0	0	0	0	1	0	0	0	0	0	0	0	0	0	0	0	0	0	0	0	0	0	0	0
ENSG00000087152_ATXN7L3	761	359	613	226	599	373	579	523	1135	594	1019	673	470	580	686	689	779	576	254	484	606	831	252	506	339	628	660	708	1024	722	658	730	969	537	823	811	604	750	803	415	565	766	923	684	846	677	436	602	582
ENSG00000087157_PGS1	149	107	58	53	202	143	40	169	181	84	136	79	91	122	181	157	201	43	213	134	136	107	82	186	65	306	605	240	192	162	215	223	158	80	120	86	237	109	180	66	145	57	194	79	153	150	10	134	87
ENSG00000087191_PSMC5	573	1115	421	600	236	396	643	275	621	261	750	406	533	467	465	501	621	716	490	380	536	511	369	520	289	1257	709	365	794	667	578	832	718	395	333	240	519	259	693	437	445	497	425	534	545	338	186	414	362
ENSG00000087206_UIMC1	7956	5441	3359	3787	5266	3098	4549	3641	8367	6354	9941	5922	4893	6382	4929	4750	7724	7016	4034	5285	7194	7372	3485	7317	3788	4248	5459	8832	6809	6053	6972	5763	6986	9147	8830	8223	8394	10030	8082	4769	6069	7031	9012	5820	7211	8363	6943	7764	7990
ENSG00000087237_CETP	2260	4234	1929	1910	4390	1536	3367	1073	3403	1694	3892	1102	1641	1189	2536	1410	3153	1347	982	1090	2751	3263	3095	1506	798	645	789	1991	2682	1867	2684	1445	1237	1945	2204	2807	1743	1097	2023	1567	1226	1112	2247	1807	2116	2264	986	2404	1096
ENSG00000087245_MMP2	0	67	14	7	0	114	24	3	16	0	0	3	0	6	0	7	0	0	0	0	0	0	0	4	0	0	15	0	1	7	6	8	0	0	0	0	0	0	0	0	0	0	0	0	0	0	0	15	0
ENSG00000087250_MT3	0	0	0	0	0	2	0	2	0	0	0	0	0	0	0	0	0	0	0	0	0	0	0	0	0	0	0	0	0	0	0	0	0	0	0	0	0	0	0	0	0	0	0	0	0	0	1	0	0
ENSG00000087253_LPCAT2	0	7	1	148	1	2	0	0	7	32	0	16	0	0	0	263	26	11	25	0	1	3	0	94	46	289	1146	411	93	133	126	95	95	5	5	22	25	1	2	0	14	0	13	3	13	53	32	0	3
ENSG00000087258_GNAO1	539	156	264	158	317	288	290	209	690	470	532	613	421	398	440	493	397	383	195	172	601	581	469	319	147	293	277	355	427	258	325	374	409	490	467	676	634	368	589	194	347	528	564	341	435	426	327	578	440
ENSG00000087263_OGFOD1	326	276	179	115	626	302	120	234	984	375	733	201	259	231	109	159	563	167	221	128	326	246	134	400	318	638	429	410	307	404	409	492	416	329	414	422	280	335	381	96	295	112	521	320	341	482	111	278	340
ENSG00000087266_SH3BP2	55	96	91	117	105	12	33	150	530	20	270	84	1	7	242	379	12	7	117	4	50	15	34	507	13	2374	2565	815	230	721	705	1343	351	18	8	106	10	161	30	8	69	17	159	1	142	55	61	12	14
ENSG00000087269_NOP14	73	29	5	17	46	37	59	102	243	74	145	59	80	71	104	75	71	108	119	43	125	106	20	183	36	599	400	159	137	246	260	474	160	147	179	135	53	147	114	24	107	66	187	113	104	176	50	112	67
ENSG00000087274_ADD1	6578	1279	1469	1392	4472	1427	2501	5073	8102	3513	9015	3699	3455	3935	4526	3650	6892	3877	1852	1730	4516	4739	1713	4562	2144	6199	5017	5021	4403	4292	5041	5164	5500	4304	4263	4611	4528	3850	6502	1690	3092	2931	4091	3407	5440	4179	2669	3873	4360
ENSG00000087299_L2HGDH	30	48	0	62	17	5	31	7	57	23	12	66	68	63	17	39	70	101	0	13	56	54	2	37	9	66	55	50	66	38	35	58	76	121	41	48	35	60	70	8	56	29	86	34	28	83	15	79	27
ENSG00000087301_TXNDC16	675	355	329	308	707	198	184	409	832	686	972	596	396	663	746	546	597	867	106	197	720	757	246	782	403	756	818	795	791	809	762	754	638	1189	1166	975	741	1165	718	361	751	705	905	538	858	1222	555	934	897
ENSG00000087302_C14orf166	922	832	442	310	629	147	569	465	558	334	1194	532	315	695	439	223	641	600	726	401	454	458	258	681	221	821	705	476	386	506	603	753	551	577	374	453	822	525	623	474	427	464	706	464	829	409	250	484	725
ENSG00000087303_NID2	697	135	298	89	478	125	399	564	653	609	845	414	358	737	469	541	927	670	251	279	639	585	280	549	151	432	291	614	698	489	486	413	800	454	979	662	783	467	791	189	628	526	579	690	584	797	326	572	507
ENSG00000087338_GMCL1	317	361	404	96	552	116	212	138	894	394	595	301	260	233	379	513	441	373	286	170	333	279	276	495	377	830	752	369	444	349	396	743	611	394	378	253	308	484	502	53	388	343	507	314	343	322	118	616	320
ENSG00000087365_SF3B2	670	138	327	234	361	296	261	585	927	457	1031	290	364	408	697	600	806	429	315	344	439	400	147	1009	453	2709	2185	932	605	1022	1017	1899	854	372	545	626	757	649	620	286	413	427	636	320	483	437	267	409	342
ENSG00000087448_KLHL42	51	4	34	26	8	50	6	16	38	11	70	31	10	12	69	45	25	33	6	4	18	13	35	41	26	72	37	49	49	34	35	79	24	43	32	19	27	23	25	24	11	23	37	16	13	12	2	27	12
ENSG00000087460_GNAS	196249	94362	85800	60080	215900	109305	103699	169781	323811	209596	273093	202235	118271	159266	158658	175676	188387	150574	74748	88586	205435	168248	89249	144403	79928	88947	118226	184401	166810	154602	167951	145827	181602	198190	224986	224689	149173	243169	249565	66066	113807	138210	234028	184881	178616	196772	150143	236383	248769
ENSG00000087470_DNM1L	9447	3706	3251	3370	6606	3110	4160	4694	10776	6148	9588	5739	5948	9596	6196	5027	8523	8993	2818	3571	9439	7623	2887	7798	3636	5181	3480	6919	11707	7383	5153	5749	9803	10138	9831	6073	11597	8494	8852	3403	8331	4838	7011	6592	7597	10976	4020	7871	8091
ENSG00000087494_PTHLH	11	0	0	0	0	2	0	0	0	0	7	0	0	0	0	0	0	2	0	0	0	0	0	2	0	0	0	0	0	0	1	0	7	0	0	0	0	0	0	0	0	0	7	0	0	0	1	2	6
ENSG00000087495_PHACTR3	416	164	142	158	190	49	110	274	371	381	211	268	349	328	342	266	459	200	118	210	320	415	136	208	47	225	159	440	405	218	220	301	299	284	445	411	431	499	391	119	308	281	259	269	375	308	248	234	305
ENSG00000087502_ERGIC2	117	66	92	147	79	66	123	17	172	73	93	32	44	116	82	140	138	95	3	104	89	106	62	211	148	404	509	197	143	131	135	345	163	134	97	85	232	118	101	71	102	53	82	93	146	207	58	124	114
ENSG00000087510_TFAP2C	0	0	1	0	0	3	1	0	0	0	0	0	0	0	0	0	0	0	0	0	0	0	0	0	10	0	0	0	0	0	7	0	0	1	0	0	0	0	0	0	0	0	0	2	0	0	9	0	0
ENSG00000087586_AURKA	173	119	169	257	174	54	7	157	463	333	253	267	212	202	162	132	335	394	7	119	299	432	143	238	240	221	274	246	292	263	361	337	298	336	401	379	329	305	300	91	289	260	335	268	471	460	491	391	305
ENSG00000087589_CASS4	686	121	91	118	467	53	137	250	701	210	830	332	265	233	247	228	445	291	70	179	243	365	107	267	112	487	653	496	295	287	506	342	513	170	329	326	804	253	281	108	459	99	298	219	347	328	141	265	291
ENSG00000087842_PIR	42	1	0	0	6	5	0	2	15	8	35	5	18	7	23	1	8	1	0	0	7	14	0	4	0	4	15	7	15	1	10	4	5	3	13	17	0	13	3	0	13	0	31	6	0	13	0	15	14
ENSG00000087884_AAMDC	26	12	10	25	8	3	6	32	32	0	35	9	3	26	2	3	10	15	16	7	25	22	8	23	19	20	20	18	26	15	27	29	10	10	10	7	20	22	5	34	18	22	24	16	12	13	0	14	3
ENSG00000087903_RFX2	172	27	48	51	107	123	15	70	139	81	185	43	77	184	66	59	190	65	143	30	72	114	8	71	118	125	290	196	103	108	86	60	76	78	116	71	112	63	93	42	127	97	115	117	98	116	47	90	71
ENSG00000087916_SLC6A14	0	0	0	0	0	0	2	0	1	0	0	0	0	0	0	0	0	0	0	0	0	0	0	0	0	0	0	0	0	0	0	0	0	0	0	0	0	0	0	0	0	0	0	0	0	0	2	0	0
ENSG00000087995_METTL2A	10	4	41	0	0	7	0	0	30	47	23	2	0	0	0	0	0	0	0	0	0	2	0	64	0	246	91	31	37	52	141	162	6	5	0	5	0	6	3	0	17	0	13	9	0	15	0	0	1
ENSG00000088002_SULT2B1	0	0	0	0	0	1	0	0	2	0	0	0	0	0	0	0	0	0	0	0	0	0	0	0	0	0	0	0	1	0	0	2	0	0	0	0	0	0	0	0	0	0	0	0	0	0	13	0	0
ENSG00000088035_ALG6	16	182	82	72	60	0	132	1	258	47	90	22	95	47	35	30	52	8	113	0	67	30	101	167	0	625	409	110	100	165	208	512	91	53	90	105	102	156	24	0	84	0	66	41	82	66	13	83	71
ENSG00000088038_CNOT3	225	137	53	76	146	11	99	84	275	123	225	104	41	126	124	203	192	125	65	84	140	171	83	251	106	720	678	321	250	289	256	458	238	147	161	193	228	180	164	106	125	155	176	137	129	126	154	168	215
ENSG00000088053_GP6	23996	12304	7378	3870	21968	7179	11910	14662	22889	18502	30992	16665	11025	18372	18848	13723	29419	10653	7292	10471	14452	19305	6800	15445	7776	11255	7633	21137	19934	15497	17929	12825	19486	13747	19131	18965	19892	13258	17309	6900	16194	8795	15520	17607	21670	15629	7659	17481	18780
ENSG00000088179_PTPN4	649	569	557	392	758	69	280	271	1394	439	810	570	551	536	709	594	847	660	775	284	645	535	179	1321	288	4177	1708	805	845	1196	1506	3234	978	835	881	946	786	1059	817	293	639	373	756	576	796	936	534	796	541
ENSG00000088205_DDX18	22	90	60	38	56	33	5	20	261	32	182	7	0	28	33	85	24	29	18	19	28	22	16	165	17	804	425	69	108	176	367	542	73	30	14	58	49	77	17	14	28	19	90	19	13	77	21	17	6
ENSG00000088247_KHSRP	349	17	233	82	344	92	30	121	268	142	445	161	145	223	176	213	355	160	54	124	166	226	108	267	50	936	607	252	381	385	406	693	305	193	218	166	236	262	202	30	247	265	228	239	189	283	249	164	236
ENSG00000088256_GNA11	0	0	1	0	0	18	5	0	14	0	0	0	1	5	0	0	0	0	0	0	2	0	0	8	0	1	2	0	4	1	0	0	0	0	0	0	0	0	0	0	0	0	3	0	9	1	2	2	0
ENSG00000088280_ASAP3	193	66	1	26	15	181	21	105	72	59	161	195	131	207	53	119	162	126	68	48	107	249	57	75	24	40	67	61	170	90	45	81	130	63	83	21	98	36	126	77	164	138	53	85	126	13	25	116	71
ENSG00000088298_EDEM2	210	52	224	120	92	7	129	82	148	99	255	75	106	47	115	154	167	53	17	122	88	66	37	127	61	580	464	240	125	157	178	380	144	85	129	140	189	70	172	11	60	91	145	52	143	96	40	73	81
ENSG00000088305_DNMT3B	250	94	90	116	94	156	119	115	175	146	400	324	256	243	98	125	281	260	65	131	175	181	31	140	110	108	173	276	214	165	142	115	172	117	161	208	167	151	267	98	185	311	313	113	172	234	27	138	210
ENSG00000088320_REM1	13	0	8	0	0	2	0	0	0	0	0	0	0	0	0	0	0	0	0	0	0	0	5	0	0	0	0	2	0	0	0	0	0	0	0	0	0	0	0	0	0	0	0	0	0	0	0	0	0
ENSG00000088325_TPX2	86	19	83	1	26	41	7	34	68	88	86	47	51	44	52	38	52	60	24	18	70	77	67	54	104	93	118	92	73	102	81	73	86	91	105	70	84	136	59	0	50	91	78	45	37	103	83	61	38
ENSG00000088340_FER1L4	6	1	1	1	0	3	1	1	8	0	0	0	0	0	0	0	0	0	0	0	0	0	0	0	0	0	5	2	0	6	8	0	0	0	0	0	0	0	0	0	0	0	0	0	0	0	0	0	0
ENSG00000088356_PDRG1	7	0	0	14	8	51	23	4	8	2	14	4	0	20	48	1	35	11	0	34	39	17	11	35	0	76	43	17	15	17	73	42	9	3	2	22	46	10	12	29	9	48	9	6	25	6	11	14	25
ENSG00000088367_EPB41L1	50	4	1	0	34	73	0	9	25	40	22	41	23	41	42	90	77	20	0	2	27	58	7	45	15	14	36	14	91	42	6	22	63	65	20	65	64	107	77	5	67	35	43	16	73	54	72	40	1
ENSG00000088386_SLC15A1	0	1	0	0	0	1	0	1	0	0	0	0	0	0	0	0	0	0	0	0	0	0	0	0	0	0	0	0	0	0	0	0	0	0	0	0	0	0	0	0	0	0	0	0	0	0	1	0	0
ENSG00000088387_DOCK9	179	15	106	28	59	3	10	50	241	111	246	61	17	71	149	90	64	11	0	35	80	30	1	328	35	1077	458	228	134	189	449	934	73	33	93	198	33	130	24	45	108	25	130	36	92	97	60	41	24
ENSG00000088448_ANKRD10	2227	1013	1629	1246	2546	865	1570	1456	2435	2086	2759	2576	1524	2098	1650	2074	1779	2245	1123	1857	1534	1854	871	2737	958	2299	2332	1498	2775	1364	1764	2254	2728	1848	2516	2996	2565	2533	3730	1808	1733	1706	2633	1884	2060	2743	1397	1657	2700
ENSG00000088451_TGDS	81	0	1	0	20	4	27	8	36	30	89	46	67	90	29	94	49	52	19	22	35	18	2	59	0	110	83	44	53	62	49	101	64	30	42	76	80	10	34	50	31	23	28	64	50	43	11	9	43
ENSG00000088538_DOCK3	3	0	0	15	0	6	28	3	7	0	7	0	62	1	0	11	0	9	0	2	0	0	0	19	0	75	73	10	11	27	26	14	3	0	0	0	0	15	2	0	2	0	0	1	0	14	6	3	3
ENSG00000088543_C3orf18	0	0	13	1	0	2	0	0	3	0	2	0	0	0	0	3	0	0	0	0	4	0	4	5	0	36	19	1	10	6	18	18	5	0	0	11	0	1	4	0	0	0	0	0	0	0	0	0	0
ENSG00000088682_COQ9	100	81	242	17	53	19	6	62	72	18	57	55	70	44	73	152	76	117	14	31	56	101	137	85	0	351	163	70	90	110	113	246	125	65	49	81	78	84	134	39	45	56	86	110	108	63	23	64	40
ENSG00000088726_TMEM40	17987	16573	13498	12006	15444	16008	17594	8334	18677	9679	23162	13401	10743	13348	10751	8686	16067	12328	13400	15773	13216	14285	11672	13931	8669	8946	6805	16906	16187	11534	14072	13003	12576	13438	17631	15581	13838	10834	16699	12863	13624	13042	13788	12080	18341	14712	6107	13284	11544
ENSG00000088727_KIF9	77	135	52	29	13	1	8	25	23	64	57	25	37	41	48	3	61	53	10	32	46	59	0	45	0	45	67	39	69	39	17	56	43	61	52	67	50	48	47	20	43	14	29	81	42	34	0	51	74
ENSG00000088756_ARHGAP28	0	0	0	0	0	0	1	1	5	0	0	1	0	0	0	1	0	0	0	0	5	1	0	0	0	0	0	3	4	3	0	4	7	0	0	0	1	0	0	0	9	0	4	0	0	0	0	4	0
ENSG00000088766_CRLS1	628	461	258	113	951	539	296	328	1077	434	1028	541	234	570	415	627	668	489	315	228	501	557	216	678	286	485	536	614	796	603	550	586	531	623	999	771	420	817	666	253	708	439	1135	627	867	1091	211	502	463
ENSG00000088782_DEFB127	0	0	0	0	0	0	0	0	0	0	0	0	0	0	0	0	0	0	0	0	0	0	0	0	0	0	0	0	0	0	0	0	0	0	0	0	0	0	0	0	0	0	0	0	0	0	0	0	0
ENSG00000088808_PPP1R13B	0	0	0	0	2	7	1	7	25	15	15	0	0	0	30	12	2	0	0	0	3	0	0	37	0	194	72	21	10	33	52	136	20	8	1	0	9	13	0	0	5	0	27	5	0	0	1	7	4
ENSG00000088812_ATRN	71	18	19	19	85	61	52	55	279	32	276	53	99	53	113	99	100	59	91	62	58	87	71	165	45	590	362	86	196	245	215	548	121	73	73	88	21	135	85	35	90	45	158	57	114	76	45	62	75
ENSG00000088826_SMOX	6559	3960	2586	1887	5548	3006	5076	4966	8574	7090	9777	5810	5302	4573	6381	4151	6499	5511	4277	3922	5706	5426	3645	6238	2382	2938	4138	7742	5030	5723	5336	5882	4309	5808	7965	7334	6065	4597	7272	3501	5343	4418	5535	5687	6027	5249	3490	5304	5900
ENSG00000088827_SIGLEC1	0	12	1	0	0	17	0	3	0	0	5	0	0	0	0	3	0	0	0	0	0	0	0	10	0	5	15	2	14	14	3	3	0	0	0	0	0	0	0	0	0	0	0	1	0	0	0	2	0
ENSG00000088832_FKBP1A	12435	11002	7488	5153	11576	7912	9967	6223	16581	11294	16834	11565	8763	10809	8470	10792	14788	9021	6635	7061	11043	12543	6333	8196	7425	5918	6535	10172	10200	8766	8673	7878	11524	12425	13411	10904	12061	11266	13466	8687	9766	12724	11244	10188	14280	11198	3887	11527	10883
ENSG00000088833_NSFL1C	997	731	141	188	822	397	333	453	643	313	1240	471	361	523	508	488	769	419	508	748	558	501	542	797	380	819	997	855	646	610	672	754	602	508	862	812	649	646	592	301	680	788	859	544	675	623	281	610	697
ENSG00000088836_SLC4A11	23	7	39	8	105	7	159	39	84	54	53	58	24	31	33	59	81	58	24	44	28	34	73	58	143	46	71	77	55	56	34	29	26	38	57	60	1	17	21	70	62	56	79	40	20	26	2	26	26
ENSG00000088854_C20orf194	166	82	11	140	185	45	35	36	403	197	260	122	122	238	187	136	215	207	92	53	245	179	45	193	1	366	247	181	236	261	282	364	280	246	219	175	160	210	140	135	123	102	210	142	182	294	163	209	184
ENSG00000088876_ZNF343	5	0	4	4	3	5	1	4	7	0	20	1	0	0	13	10	0	7	0	1	13	2	0	16	0	74	57	10	13	31	16	54	16	2	1	0	28	6	3	4	5	1	9	5	6	1	0	11	7
ENSG00000088881_EBF4	0	0	1	0	1	2	1	26	6	0	1	0	0	0	1	0	0	0	0	0	1	0	0	9	0	128	23	6	4	5	3	22	8	0	0	0	0	2	0	0	0	10	2	1	0	0	0	0	0
ENSG00000088882_CPXM1	0	0	0	0	0	2	0	0	0	0	0	10	0	0	6	0	0	0	0	0	1	0	0	7	0	15	8	0	0	0	0	9	1	0	0	3	0	0	1	0	3	0	0	0	0	3	3	0	0
ENSG00000088888_MAVS	2289	1103	889	629	1716	506	895	1521	2317	885	2935	1426	1551	1350	1463	1139	1939	1141	732	980	1031	1567	966	1556	1118	1179	1132	1215	1789	1226	1028	1162	2015	1023	1514	1489	910	644	1374	1120	1632	1101	1722	1255	1453	1324	614	1250	945
ENSG00000088899_LZTS3	0	0	0	0	0	6	0	6	6	0	0	0	4	0	0	0	0	2	0	0	0	4	0	0	0	1	0	1	4	1	0	2	1	0	0	0	0	0	0	0	1	5	0	2	1	0	2	1	0
ENSG00000088926_F11	0	0	0	0	0	0	0	0	0	0	16	0	0	0	0	0	0	0	0	0	0	0	0	0	0	0	0	0	0	0	0	15	0	0	0	0	0	0	0	0	0	0	0	0	0	0	0	0	0
ENSG00000088930_XRN2	320	442	750	394	506	132	132	249	742	441	930	442	245	460	520	675	537	440	322	160	528	483	294	1047	233	2525	3567	1239	733	1112	1215	1885	838	509	697	650	561	842	589	308	399	457	592	371	650	799	532	612	532
ENSG00000088970_PLK1S1	74	23	44	89	156	121	31	113	267	172	270	98	115	69	93	132	217	114	30	33	141	212	38	198	101	501	443	182	145	218	203	362	121	142	197	132	170	220	115	16	143	54	212	117	131	102	123	102	180
ENSG00000088986_DYNLL1	14084	20686	8998	15562	11342	14766	15944	6425	14078	9024	11212	10012	8535	15697	8343	6831	10773	9795	18368	14596	8850	12732	13611	11244	7701	7467	8006	10956	9990	8229	8360	12028	11527	14463	15320	16442	14457	10147	13831	14822	13645	8277	10793	9810	18099	13136	5503	11265	10882
ENSG00000088992_TESC	202	66	65	139	75	78	17	50	367	117	224	113	4	57	72	434	143	241	412	138	13	161	135	211	424	432	609	293	391	269	317	415	313	227	110	240	299	13	5	30	163	32	199	123	103	101	34	141	92
ENSG00000089006_SNX5	905	715	494	330	1184	563	598	784	1446	938	1518	1021	814	1048	1020	864	1388	1223	398	481	1131	1227	554	930	479	1855	1162	1263	1630	1466	1178	1598	1305	1342	1480	1246	1229	1378	1488	551	1044	679	1201	1030	1257	1395	599	1457	1412
ENSG00000089009_RPL6	214	586	1042	465	379	431	297	143	982	231	924	153	122	233	355	688	465	270	377	185	342	311	210	1239	260	4390	2182	706	689	1172	1683	3126	580	266	265	357	307	508	281	143	314	340	524	307	555	541	174	313	286
ENSG00000089012_SIRPG	0	1	0	0	0	5	0	1	0	0	24	0	0	0	0	0	0	0	0	0	0	0	0	0	0	20	19	2	4	6	0	0	1	0	0	0	0	3	0	1	0	0	7	0	0	0	0	0	0
ENSG00000089022_MAPKAPK5	66	17	11	56	18	68	73	114	197	77	157	71	66	92	79	118	48	110	56	51	137	112	85	186	44	531	228	118	137	158	262	397	129	113	136	92	38	157	55	42	90	69	95	102	137	158	126	87	138
ENSG00000089041_P2RX7	5	1	0	12	15	0	0	0	80	0	19	0	0	0	67	47	0	0	35	0	1	0	0	79	0	194	175	47	23	82	85	163	33	0	2	8	0	25	0	0	10	0	7	8	13	24	0	1	0
ENSG00000089048_ESF1	25	17	1	35	12	75	1	0	53	16	36	9	3	12	89	39	7	9	0	2	16	20	24	96	61	329	218	47	68	96	120	319	52	17	43	35	64	52	20	22	29	13	60	49	20	46	65	35	9
ENSG00000089050_RBBP9	0	0	0	0	0	8	0	0	0	0	1	2	0	0	1	0	0	1	0	0	4	0	0	5	0	27	6	2	2	5	8	22	0	0	0	0	3	5	0	0	0	0	2	0	0	0	0	0	0
ENSG00000089053_ANAPC5	14029	6706	5750	4614	9389	4843	6515	6288	10444	8357	11625	7604	6566	10230	7515	6579	11555	7138	4751	6682	7434	10688	4705	9090	3584	6968	6791	8576	12081	8878	8166	9646	9490	9826	13310	10975	14480	7066	10239	6382	8413	8109	7811	10774	12244	10360	4401	8539	9420
ENSG00000089057_SLC23A2	262	117	61	40	108	66	68	159	346	61	450	166	79	174	128	199	377	222	66	86	167	145	17	223	210	358	428	346	222	169	176	276	221	224	178	201	202	121	157	121	220	45	216	157	167	167	122	128	325
ENSG00000089060_SLC8B1	44	0	23	13	0	6	12	69	35	10	39	15	4	61	12	74	0	9	0	44	7	2	0	46	0	172	365	80	32	57	56	109	22	20	4	34	45	20	0	9	14	11	11	16	16	29	23	9	9
ENSG00000089063_TMEM230	324	287	138	112	319	162	341	75	448	173	370	178	202	330	161	300	402	345	200	136	326	259	134	253	151	277	225	161	197	206	208	287	343	276	226	162	290	195	417	195	252	179	296	300	506	253	95	286	289
ENSG00000089091_DZANK1	55	0	0	0	12	0	0	3	32	11	16	4	0	5	13	0	13	17	0	0	2	1	0	23	0	78	50	12	18	14	17	57	23	16	0	0	15	14	13	0	13	0	10	7	16	10	0	3	17
ENSG00000089094_KDM2B	125	180	80	2	127	101	23	49	237	42	192	15	10	47	150	77	80	40	16	38	77	65	0	119	32	923	452	119	124	216	201	627	109	48	56	54	80	132	73	30	45	36	74	81	80	55	32	44	28
ENSG00000089101_C20orf26	0	0	0	0	0	9	0	0	0	0	0	0	14	0	0	0	0	0	0	0	0	0	0	0	0	8	1	2	1	0	0	4	0	0	2	0	0	0	0	0	0	0	0	0	0	0	0	0	0
ENSG00000089116_LHX5	0	0	0	0	0	1	0	2	0	0	0	0	0	0	0	0	0	0	0	0	0	0	0	0	0	0	0	0	0	0	0	0	0	0	0	0	0	0	0	0	0	0	0	0	0	0	0	0	0
ENSG00000089123_TASP1	194	53	88	136	89	55	75	72	349	331	98	190	176	204	151	139	298	209	134	209	258	178	228	326	5	261	296	218	293	161	204	263	252	417	395	244	222	434	253	23	194	260	243	243	193	445	90	354	210
ENSG00000089127_OAS1	2	212	194	259	2	1	0	1	17	0	101	3	14	2	46	34	8	0	11	0	7	12	123	81	0	207	185	45	69	86	109	202	91	2	0	4	2	12	4	22	8	6	49	6	6	27	1	5	0
ENSG00000089154_GCN1L1	149	59	77	109	108	52	22	54	340	5	374	35	20	24	183	188	116	42	55	91	83	71	6	348	77	2111	1075	253	253	531	657	1287	252	31	66	85	43	181	27	9	64	38	172	51	152	72	107	46	25
ENSG00000089157_RPLP0	465	766	1010	514	573	992	443	190	1302	259	1089	151	385	404	373	902	357	754	539	174	553	481	160	1401	636	5021	3409	919	931	1614	1941	3445	781	223	219	306	378	570	433	186	401	427	630	499	635	477	386	516	254
ENSG00000089159_PXN	21	122	122	184	143	50	24	43	584	30	230	31	18	24	179	392	14	15	119	92	82	12	1	546	13	2961	2575	797	178	582	616	1570	268	1	17	61	56	165	1	10	71	37	149	7	70	94	48	7	4
ENSG00000089163_SIRT4	0	0	0	0	0	38	0	2	1	0	0	0	0	0	0	0	0	0	0	0	0	0	0	0	0	1	2	0	0	7	0	26	0	0	0	0	0	0	0	0	0	0	2	0	0	0	0	0	0
ENSG00000089169_RPH3A	0	0	22	0	0	3	0	1	5	0	0	0	0	0	0	7	0	0	0	0	0	0	0	0	0	0	3	0	4	5	0	4	8	7	0	0	0	0	0	0	0	0	0	0	0	9	0	0	0
ENSG00000089177_KIF16B	115	2	129	20	182	174	136	93	130	113	117	83	87	107	197	80	144	164	116	86	125	210	48	77	72	135	263	193	179	194	128	197	183	156	218	229	265	204	138	27	146	95	208	138	127	178	56	97	116
ENSG00000089195_TRMT6	1	6	0	7	14	8	1	1	41	0	18	29	6	4	13	17	0	7	4	9	7	0	8	90	3	230	178	20	41	62	90	172	23	0	2	20	2	21	13	2	10	0	22	4	40	12	3	5	4
ENSG00000089199_CHGB	0	0	0	0	0	15	0	0	4	0	0	0	0	0	0	6	0	9	0	0	0	0	0	0	0	0	0	0	9	0	0	0	3	0	0	0	3	0	8	9	0	0	11	0	0	0	1	0	0
ENSG00000089220_PEBP1	78	92	76	81	213	140	25	23	260	65	198	37	0	31	55	102	126	66	58	42	99	45	43	187	17	406	248	69	52	117	249	270	109	27	38	55	78	75	137	53	49	19	111	98	73	61	86	120	78
ENSG00000089225_TBX5	0	0	0	0	0	1	0	0	0	0	0	0	0	0	0	0	0	0	0	0	0	0	0	0	0	0	0	0	0	0	0	0	0	0	0	0	0	0	0	0	0	0	0	0	0	0	0	0	0
ENSG00000089234_BRAP	346	164	209	276	371	125	324	255	624	473	549	372	317	407	425	281	424	379	111	368	363	417	229	600	190	561	621	432	468	427	530	653	452	582	647	618	536	909	443	118	434	428	483	412	697	678	350	549	485
ENSG00000089248_ERP29	294	481	329	209	270	430	320	69	341	109	552	151	166	306	282	258	428	301	277	289	561	304	292	472	228	751	511	250	396	469	424	600	396	264	319	274	341	351	469	258	230	548	309	368	362	246	110	249	403
ENSG00000089250_NOS1	0	0	0	0	0	0	0	1	0	0	0	0	0	0	0	0	0	0	0	0	0	0	0	0	0	0	0	0	0	0	0	0	0	0	4	0	0	0	0	0	0	0	0	0	0	0	0	0	0
ENSG00000089280_FUS	572	1566	2261	1340	505	1054	615	329	1430	271	1135	239	435	390	1072	822	767	494	1363	1218	402	423	759	2012	110	7866	6552	1711	1089	1734	2422	4665	1176	246	350	424	342	811	403	858	565	1218	1081	546	546	503	229	348	309
ENSG00000089289_IGBP1	846	555	478	363	815	337	751	354	850	580	920	597	494	280	372	354	815	636	349	646	572	606	527	749	298	812	600	722	616	621	679	661	563	594	774	806	675	663	687	403	604	447	690	566	716	730	285	638	702
ENSG00000089327_FXYD5	17449	21884	11653	9045	13432	10796	12280	7243	13558	10936	22806	9742	9878	14793	14608	11506	13859	8297	12038	12683	14512	18614	9552	15738	7304	5867	8265	11662	7773	11916	7527	14369	12206	19648	16910	15948	12698	12772	10441	8708	8250	10420	13323	14228	15435	18358	15070	11414	13264
ENSG00000089335_ZNF302	23	64	8	1	26	34	0	29	111	30	35	10	0	14	38	28	42	25	15	10	35	19	72	59	0	256	184	39	45	66	85	243	50	7	8	25	9	46	6	18	28	1	29	14	11	21	36	36	30
ENSG00000089351_GRAMD1A	458	159	170	72	354	227	255	173	581	383	510	212	289	233	241	279	442	280	254	141	252	283	59	383	251	574	1001	695	282	306	304	353	347	197	375	481	322	398	351	76	220	191	332	300	293	333	156	334	280
ENSG00000089356_FXYD3	21	18	12	0	19	1	0	5	35	0	21	13	0	2	43	12	1	16	0	6	8	13	13	17	0	1	1	6	8	4	18	2	14	9	2	17	24	4	28	14	7	1	19	27	7	3	23	16	15
ENSG00000089472_HEPH	99	20	152	17	57	2	124	71	33	8	156	37	40	100	36	21	37	76	0	7	72	13	0	20	0	24	9	21	66	29	11	13	108	29	53	36	102	15	116	10	45	14	32	43	81	87	0	28	19
ENSG00000089486_CDIP1	786	399	270	108	459	123	501	521	998	359	764	656	633	741	669	528	846	698	410	464	475	671	273	431	396	416	293	586	704	507	457	412	768	616	741	668	694	504	791	408	593	559	623	688	923	663	354	693	652
ENSG00000089505_CMTM1	13	1	1	0	1	1	0	49	1	24	3	4	15	5	0	8	4	2	0	5	6	3	0	1	0	18	28	21	8	13	4	14	4	11	9	0	11	12	21	0	3	4	18	4	7	5	0	12	1
ENSG00000089558_KCNH4	0	0	0	0	0	1	0	0	1	0	0	0	0	0	1	0	0	0	0	0	0	0	0	0	0	3	3	0	0	0	0	2	0	0	0	0	0	0	14	0	0	0	0	0	0	2	0	0	0
ENSG00000089597_GANAB	1335	1118	912	1006	1264	726	1087	896	2126	1105	2376	940	890	1035	1264	1381	1663	1216	555	933	993	1292	451	1837	922	4135	2635	1227	1479	1892	1650	3077	1820	1010	661	865	1421	934	1505	651	1149	1027	1310	1261	1161	1103	464	672	1095
ENSG00000089639_GMIP	697	247	432	182	484	247	114	431	843	363	826	374	337	324	598	788	724	326	233	387	448	414	276	729	117	1196	2237	1428	665	635	686	849	692	299	484	666	272	352	485	252	390	376	740	384	638	344	219	471	380
ENSG00000089682_RBM41	218	112	112	163	167	101	94	170	161	186	258	121	153	274	189	103	216	178	106	142	169	192	129	205	34	192	177	195	282	204	148	224	258	277	211	204	220	186	232	95	177	220	210	258	265	166	183	228	263
ENSG00000089685_BIRC5	0	0	0	0	0	45	0	0	0	0	0	4	0	0	0	1	5	0	0	0	2	0	0	0	0	5	7	0	8	5	12	0	4	2	0	0	0	0	0	0	3	0	0	0	0	3	1	0	0
ENSG00000089692_LAG3	5	0	1	0	3	6	0	1	35	0	19	0	0	0	46	34	6	0	0	0	2	0	0	3	0	127	46	8	11	43	14	237	47	0	0	0	9	17	0	0	6	12	7	0	22	16	14	0	0
ENSG00000089693_MLF2	116	37	80	61	63	106	10	7	78	58	130	21	47	86	13	140	119	44	16	47	33	69	32	119	49	424	577	244	77	136	231	237	106	30	32	56	59	56	27	32	61	64	97	56	71	42	50	66	29
ENSG00000089723_OTUB2	0	0	2	0	0	5	0	0	0	0	0	0	0	0	0	0	0	0	0	0	0	0	0	0	0	0	0	0	0	3	0	5	0	0	0	0	0	0	0	0	0	0	0	0	0	0	0	0	0
ENSG00000089737_DDX24	319	290	393	300	406	245	244	346	460	217	920	217	347	338	407	293	450	183	180	363	250	488	631	366	170	1790	694	464	612	544	758	1295	333	462	262	353	448	336	358	270	256	484	424	282	288	308	162	222	222
ENSG00000089775_ZBTB25	44	8	0	0	57	19	26	7	21	23	27	3	6	24	42	12	24	11	34	6	10	32	0	37	16	125	74	35	26	45	39	99	28	24	20	25	32	33	11	2	22	29	32	10	31	17	6	22	15
ENSG00000089818_NECAP1	22	63	167	85	10	13	1	4	28	5	45	12	20	21	54	50	22	29	10	5	20	13	0	95	5	369	402	100	43	117	117	252	72	19	17	23	24	38	6	19	22	13	44	13	86	14	2	10	21
ENSG00000089820_ARHGAP4	327	202	544	87	293	62	162	232	813	88	597	262	170	111	240	700	657	165	176	90	260	290	81	529	122	2176	2025	1039	800	683	915	1445	753	132	151	364	279	473	334	74	190	274	340	303	402	410	116	358	110
ENSG00000089847_ANKRD24	0	1	1	0	0	0	0	0	2	0	0	0	0	0	0	0	0	4	0	0	2	0	0	0	0	10	9	3	0	2	5	3	1	0	0	6	0	0	0	10	0	0	0	0	0	0	0	0	0
ENSG00000089876_DHX32	10	15	1	0	1	9	0	3	9	0	43	18	0	3	18	13	9	6	7	9	16	4	0	32	0	105	67	23	40	34	43	49	15	8	16	21	1	3	8	9	8	6	27	5	22	6	0	4	8
ENSG00000089902_RCOR1	465	413	335	182	401	93	364	342	660	614	776	441	326	341	480	419	524	349	99	126	352	383	201	499	54	528	1083	645	400	443	402	479	390	417	563	567	315	606	418	210	421	291	560	338	427	446	353	434	494
ENSG00000089916_GPATCH2L	1109	540	369	562	975	338	378	338	946	925	1242	939	689	761	933	500	783	921	498	553	961	647	497	983	417	913	827	1427	620	581	837	978	651	1150	839	1139	701	850	1383	646	1094	745	919	624	667	959	870	956	593
ENSG00000090006_LTBP4	128	52	41	32	118	43	105	62	217	52	198	63	92	89	93	85	70	88	72	26	71	85	37	79	60	682	118	58	107	112	485	550	136	78	80	69	68	76	104	24	62	78	138	72	92	59	48	96	42
ENSG00000090013_BLVRB	72	18	99	26	7	20	9	7	39	20	51	15	35	12	8	436	18	84	18	33	26	33	48	96	169	221	1138	220	202	225	110	219	49	15	17	35	23	23	27	14	20	18	61	27	35	48	2	21	19
ENSG00000090020_SLC9A1	3283	834	992	402	1353	722	653	1699	3166	1674	3961	2308	1922	2689	2213	1660	3766	2227	794	1158	1966	2770	506	1572	963	1901	1396	2102	2588	2116	2076	1757	2963	2012	2313	2045	3350	1537	2783	799	2535	1475	1702	2113	2710	3328	1227	1994	1972
ENSG00000090054_SPTLC1	234	344	150	278	194	95	146	114	350	109	376	229	159	297	285	272	160	200	177	177	202	167	63	279	132	1048	820	421	268	393	428	727	336	176	250	125	213	254	161	108	248	279	211	224	226	360	173	282	132
ENSG00000090060_PAPOLA	5253	2095	1182	1397	5206	1416	1847	1953	6001	3310	6532	3769	3112	4360	4116	3537	5602	3657	954	1631	3798	3919	1798	5126	1544	5218	6198	5266	4821	5031	4661	5471	4576	5224	5162	5153	6329	5180	5362	1610	3918	2382	5642	4188	4781	5095	3016	4964	5532
ENSG00000090061_CCNK	674	512	497	365	753	456	282	242	524	331	885	430	627	555	460	392	832	425	211	294	426	421	363	672	385	1112	866	687	517	459	506	669	553	491	526	408	696	391	623	495	410	443	612	438	590	461	255	486	902
ENSG00000090097_PCBP4	10	39	0	5	0	9	0	0	10	0	17	0	7	0	0	9	0	0	0	0	3	8	0	9	0	78	7	3	8	13	66	68	14	0	0	11	0	1	0	0	15	0	1	0	4	0	0	3	0
ENSG00000090104_RGS1	0	3	62	5	29	36	1	2	7	0	8	0	0	0	8	4	0	2	0	0	1	0	0	8	0	73	73	8	8	4	27	6	1	0	0	0	0	0	0	0	1	0	2	0	0	0	0	0	0
ENSG00000090238_YPEL3	474	212	332	255	485	279	270	246	509	326	524	313	120	323	426	629	252	245	398	674	265	277	565	548	355	892	1193	742	501	540	466	460	289	410	456	564	292	566	250	312	238	467	523	383	239	310	218	244	318
ENSG00000090263_MRPS33	0	18	19	18	0	6	1	0	29	0	12	0	1	6	15	16	10	6	2	1	15	20	31	21	0	145	51	9	6	43	50	62	25	4	8	30	0	28	0	0	6	28	1	6	2	3	0	2	0
ENSG00000090266_NDUFB2	6	72	123	41	18	4	1	4	75	11	72	5	1	43	54	25	7	9	3	47	25	24	82	110	3	420	141	60	55	100	91	281	24	14	19	37	30	54	11	27	19	26	40	17	29	21	14	22	6
ENSG00000090273_NUDC	637	334	269	278	404	381	196	487	505	453	1279	351	195	218	444	294	518	237	595	481	289	312	414	341	73	1118	720	339	325	551	518	643	387	270	310	374	676	187	295	210	365	566	324	328	324	213	201	269	329
ENSG00000090316_MAEA	69	57	222	103	40	93	12	38	131	67	145	65	36	46	65	91	73	41	63	40	43	50	52	132	0	460	477	194	97	95	167	231	87	39	62	43	69	39	25	37	59	119	83	37	61	42	28	22	40
ENSG00000090339_ICAM1	15	51	1	86	0	31	28	24	26	0	5	11	0	0	4	63	0	0	0	0	5	3	0	49	0	162	417	211	35	47	28	76	22	0	1	18	3	9	0	0	0	0	2	1	6	5	0	3	0
ENSG00000090372_STRN4	4003	2570	1556	880	2843	773	2849	1955	4810	1774	5023	3189	3188	3620	3400	2594	4126	3008	3063	3148	2634	3116	2263	2049	1673	2293	2487	3261	4421	3003	2858	2562	4141	3242	3524	4018	2950	1871	3828	2012	3050	3853	3397	3172	3645	3019	1527	2870	2954
ENSG00000090376_IRAK3	1246	1218	947	573	1657	925	1027	325	2075	1982	1331	1489	1181	1774	1636	1213	1787	1911	796	1183	2167	2037	662	1942	590	1063	1508	2010	1665	1472	1421	1857	1675	2523	3383	1854	1466	3288	2260	930	1999	1682	2127	1787	1801	1895	995	2800	2093
ENSG00000090382_LYZ	458	2608	15675	5855	1077	253	676	82	549	460	2432	409	134	222	437	7093	722	131	1436	310	364	1106	212	8976	244	4571	37640	5636	5168	10664	2493	10656	1042	242	207	1537	408	266	135	405	216	619	1418	505	1803	2609	111	263	248
ENSG00000090402_SI	0	0	0	0	0	0	0	0	0	0	0	0	0	0	0	0	0	0	0	0	0	0	0	0	0	0	0	0	0	0	0	0	0	0	0	0	0	0	0	0	0	0	0	0	0	0	0	0	0
ENSG00000090432_MUL1	25	9	0	0	37	13	14	0	30	13	2	3	12	2	5	8	2	5	0	3	7	5	0	39	20	96	56	60	16	32	15	83	19	1	2	10	24	22	0	5	19	14	46	9	6	14	0	19	0
ENSG00000090447_TFAP4	1	0	0	5	0	4	3	2	1	20	5	6	0	0	7	0	1	4	0	0	4	8	0	5	2	41	25	5	9	18	12	24	9	0	0	7	1	2	5	0	13	0	2	6	0	7	9	8	1
ENSG00000090470_PDCD7	54	0	3	0	54	4	9	80	95	4	66	15	5	19	48	44	19	15	15	14	35	21	1	54	77	245	127	36	35	87	90	173	52	47	36	28	65	45	22	10	36	55	42	38	49	43	23	16	21
ENSG00000090487_SPG21	426	366	568	434	511	157	246	96	805	245	610	343	332	337	520	542	509	341	606	75	548	319	389	709	205	963	1737	773	360	694	646	818	453	456	487	588	499	384	670	184	347	346	718	636	697	420	162	704	584
ENSG00000090512_FETUB	0	0	0	0	0	0	0	4	0	0	0	0	0	0	0	0	0	0	0	0	0	0	0	0	0	0	0	0	0	0	0	0	0	0	0	0	0	0	0	0	0	0	0	0	0	0	0	0	0
ENSG00000090520_DNAJB11	103	80	46	117	59	55	8	30	130	34	205	39	4	74	54	133	13	52	36	18	46	52	104	172	15	627	344	92	93	158	185	368	99	32	45	31	133	77	32	37	59	12	80	27	85	66	46	51	36
ENSG00000090530_LEPREL1	103	50	108	8	1	51	1	16	29	25	42	68	32	2	62	65	31	22	5	17	70	85	9	21	18	28	121	15	61	12	54	27	47	23	62	21	39	10	142	36	33	0	65	34	14	23	18	126	24
ENSG00000090534_THPO	0	0	0	0	0	1	0	1	0	0	0	0	0	0	0	0	0	0	0	0	0	0	0	0	0	0	0	0	0	0	0	8	0	0	0	0	0	0	0	0	0	0	0	0	0	0	0	0	0
ENSG00000090539_CHRD	0	0	0	0	0	2	0	2	0	0	0	0	0	0	0	0	0	0	0	0	0	0	0	0	0	1	0	0	0	0	0	0	0	0	0	0	0	0	0	0	0	0	0	0	0	0	0	0	0
ENSG00000090554_FLT3LG	1	14	0	0	3	0	0	0	47	0	5	0	0	0	10	32	1	2	0	0	4	0	0	25	0	134	28	6	15	36	49	80	5	0	0	0	3	14	3	6	20	0	12	0	2	13	0	0	0
ENSG00000090565_RAB11FIP3	761	767	857	261	544	268	375	926	1123	499	1809	572	475	529	584	683	685	481	208	695	513	716	514	584	546	764	634	929	993	733	785	810	547	800	944	604	665	497	656	549	528	822	544	483	622	497	269	485	598
ENSG00000090581_GNPTG	470	205	372	303	216	270	184	170	480	84	653	222	172	297	256	319	351	251	404	318	234	335	225	334	117	768	582	288	421	549	364	561	464	326	236	277	389	323	504	155	325	282	346	251	348	253	234	302	254
ENSG00000090612_ZNF268	99	13	73	118	55	167	9	80	148	68	69	78	155	75	90	46	26	64	76	39	49	73	0	143	85	199	127	98	106	120	95	196	121	94	134	131	68	63	55	56	45	58	98	44	86	46	62	74	75
ENSG00000090615_GOLGA3	64	80	48	29	93	54	44	39	209	42	127	49	16	44	101	94	144	40	43	14	91	89	26	144	56	787	725	154	158	212	237	736	152	29	49	89	35	72	116	31	58	71	83	75	119	72	22	46	37
ENSG00000090621_PABPC4	36	69	237	115	7	135	2	6	78	16	44	20	1	45	33	44	37	26	43	15	26	21	11	133	15	593	407	108	125	206	240	425	40	25	40	68	17	63	48	41	24	86	73	19	92	46	77	36	38
ENSG00000090659_CD209	0	1	0	2	0	2	1	1	2	0	0	0	0	0	0	3	0	0	0	0	0	0	0	0	0	0	4	0	0	2	0	18	0	0	0	0	0	0	0	0	0	0	0	0	0	0	0	0	0
ENSG00000090661_CERS4	2	1	1	7	20	31	41	22	58	6	79	25	4	28	15	19	30	24	23	21	23	8	1	35	0	177	91	20	75	40	57	138	48	11	30	20	31	20	31	9	21	10	34	7	36	10	0	23	24
ENSG00000090674_MCOLN1	64	0	172	69	29	27	18	18	41	28	117	20	46	44	27	360	53	84	74	11	41	47	7	96	190	288	681	200	156	219	40	239	46	10	14	48	30	19	33	64	31	41	98	35	61	29	46	21	6
ENSG00000090686_USP48	860	485	445	301	712	335	383	382	1014	871	971	627	512	877	767	679	759	570	268	452	676	902	366	1038	265	1838	1533	1071	903	897	1082	1779	1019	1013	1197	974	973	1396	841	529	744	612	937	642	1123	1238	597	1005	790
ENSG00000090776_EFNB1	1308	387	758	168	1077	475	370	994	1175	728	1364	692	677	638	923	463	699	485	401	795	630	682	550	740	499	786	672	1026	652	674	949	815	821	726	915	983	995	715	826	471	766	408	676	629	1140	906	693	490	753
ENSG00000090857_PDPR	128	12	25	113	163	133	97	21	513	74	463	132	198	162	107	371	86	76	292	140	207	123	80	267	63	917	771	232	232	497	435	693	192	127	59	161	152	150	123	30	67	85	105	171	220	136	66	149	88
ENSG00000090861_AARS	256	273	310	287	648	231	239	301	541	368	576	193	164	309	302	337	273	321	239	184	393	342	289	544	601	1728	862	590	596	556	605	1362	396	355	448	265	408	502	343	180	197	508	752	463	506	489	474	432	346
ENSG00000090863_GLG1	1417	568	1116	483	1767	244	959	862	2454	1200	2419	844	1119	1422	1759	1183	1849	1113	458	815	1280	1338	553	2174	425	5633	3268	1854	2148	2293	2036	4071	2093	1447	1362	1459	1459	1545	1318	620	1460	1104	1545	1490	1589	1433	1224	1231	1507
ENSG00000090889_KIF4A	42	110	117	6	56	68	59	81	118	125	137	74	49	76	46	90	68	123	23	8	93	139	6	119	0	59	118	145	92	170	98	53	128	130	122	75	109	124	120	70	124	109	95	122	91	136	184	95	30
ENSG00000090905_TNRC6A	492	158	426	241	492	38	116	167	763	603	1157	380	349	237	449	418	518	380	240	217	341	592	183	498	242	1564	1014	602	464	553	582	1528	458	281	466	402	387	538	364	123	365	280	429	336	483	363	301	312	329
ENSG00000090920_FCGBP	774	258	329	241	109	1303	192	98	516	79	163	0	0	0	20	35	40	0	0	20	67	20	0	67	0	1733	317	128	207	206	1522	2051	54	11	85	51	0	224	11	0	21	58	35	2	48	55	0	6	0
ENSG00000090924_PLEKHG2	73	46	3	9	66	18	0	15	179	57	152	47	47	23	106	111	57	44	13	12	51	62	3	97	88	229	249	132	81	112	244	185	120	35	71	55	67	96	60	39	36	50	90	79	51	90	26	69	11
ENSG00000090932_DLL3	0	0	0	0	0	5	0	2	0	0	0	0	0	0	0	0	0	0	0	0	0	0	8	0	0	0	0	0	0	0	1	0	0	0	0	0	0	0	0	0	0	0	0	0	0	0	1	0	0
ENSG00000090971_NAT14	0	0	0	0	1	3	0	1	0	0	0	1	0	0	1	0	0	0	0	0	0	0	0	0	0	2	0	2	0	2	0	3	0	0	0	0	0	0	0	0	0	0	0	0	0	0	0	0	0
ENSG00000090975_PITPNM2	8211	2666	2152	817	7392	2767	3882	5591	12170	5661	10210	6860	4843	6263	6922	6350	8884	6214	2694	2751	6015	8363	2255	4172	3670	3595	3517	8118	8188	8200	5475	5351	9935	5334	7576	7189	7156	5096	8608	2403	6210	4071	9296	8285	8560	6469	3843	7049	6667
ENSG00000090989_EXOC1	123	65	209	110	74	45	42	158	318	85	162	107	102	136	109	136	247	103	63	38	127	96	28	261	2	604	652	285	189	227	296	512	166	154	181	187	221	159	126	53	155	96	202	79	166	122	59	155	73
ENSG00000091009_RBM27	389	309	127	172	294	167	195	143	520	241	713	393	280	292	319	306	379	376	181	106	322	345	110	498	132	1353	986	527	400	608	748	1048	432	338	374	311	494	398	369	119	331	213	545	224	328	335	174	329	430
ENSG00000091010_POU4F3	0	0	0	0	0	3	0	1	0	0	0	0	0	0	0	0	0	0	0	0	0	0	0	0	0	0	1	0	0	0	0	0	0	0	0	0	0	0	0	0	0	0	0	0	0	0	1	0	0
ENSG00000091039_OSBPL8	7824	4165	4682	2694	4927	2399	4457	3362	7192	4946	7997	4870	5552	7839	6115	5139	10816	4840	1800	1819	5554	6674	1429	5856	2521	7213	10811	9122	7627	8467	6347	7506	9305	6813	6354	5967	7680	5489	7223	2054	6165	3365	6204	5712	6844	7630	2471	7094	6832
ENSG00000091073_DTX2	96	4	29	31	28	14	2	2	39	60	64	34	7	13	31	15	66	25	20	0	9	23	27	134	1	249	369	104	50	63	72	127	51	5	16	16	18	13	32	0	9	11	46	17	80	41	40	32	34
ENSG00000091106_NLRC4	7	7	12	35	0	4	33	2	10	0	15	0	0	0	1	72	0	0	0	0	0	0	0	75	0	71	451	91	54	83	30	69	16	0	1	13	10	0	2	16	0	5	3	9	43	27	0	2	5
ENSG00000091127_PUS7	293	179	215	250	249	259	272	150	632	590	321	468	222	507	325	305	423	477	186	214	393	420	242	451	195	317	367	414	456	295	318	460	428	677	842	448	420	805	534	195	398	256	480	399	634	464	523	563	510
ENSG00000091128_LAMB4	0	0	0	1	0	3	0	1	0	0	0	0	0	0	0	0	0	0	0	0	0	0	0	0	0	0	0	0	0	0	0	0	0	0	0	0	0	0	0	0	0	0	0	0	0	0	1	0	0
ENSG00000091129_NRCAM	0	0	0	0	0	28	1	0	2	0	6	0	0	0	0	0	0	0	0	0	0	0	0	0	17	5	6	2	0	0	3	0	0	0	0	0	1	0	0	0	0	0	0	4	0	0	0	0	0
ENSG00000091136_LAMB1	13	54	5	20	10	133	87	6	24	5	0	4	0	0	0	6	0	0	11	0	8	30	0	12	57	39	52	10	15	11	38	39	5	0	0	23	0	0	12	0	4	0	8	4	0	2	7	2	2
ENSG00000091137_SLC26A4	71	0	1	0	0	0	2	13	110	45	29	26	290	105	36	86	91	56	0	0	56	27	0	17	0	21	10	42	72	63	85	46	88	71	22	12	51	42	48	6	37	26	62	13	52	45	10	92	41
ENSG00000091138_SLC26A3	0	0	0	0	0	0	0	1	0	0	0	0	0	0	0	0	0	0	0	0	0	0	0	0	0	0	0	0	0	0	0	0	0	0	0	0	0	0	0	0	0	0	0	0	0	0	0	0	0
ENSG00000091140_DLD	485	259	427	254	96	142	168	168	408	190	633	117	400	328	266	204	290	238	160	277	203	295	82	571	269	1265	1062	441	336	466	532	993	352	216	319	291	203	225	145	135	289	102	212	214	388	354	102	206	294
ENSG00000091157_WDR7	904	426	356	347	620	338	396	491	1541	793	1389	749	929	883	875	743	877	955	238	350	926	790	570	1005	280	1997	1132	816	1104	1026	1166	1532	1126	1137	1286	853	1032	1090	884	538	842	607	912	731	974	1195	648	1272	912
ENSG00000091164_TXNL1	1185	1498	590	782	954	705	1491	369	1037	578	1529	812	732	861	693	665	1393	839	636	592	790	904	343	1194	627	1091	1152	1241	990	676	979	1291	946	986	820	993	1323	799	990	658	901	789	927	867	981	937	250	954	1042
ENSG00000091181_IL5RA	0	0	0	0	0	0	0	0	0	0	0	0	0	0	0	0	0	0	0	0	0	0	0	0	0	35	4	0	0	8	2	6	2	0	4	0	0	6	0	0	0	0	0	0	0	0	0	1	0
ENSG00000091262_ABCC6	4	7	31	9	0	0	0	1	0	0	0	0	0	0	0	20	0	0	0	0	0	0	0	2	0	9	64	17	15	11	0	15	1	1	0	0	0	0	0	0	0	0	0	1	2	0	1	0	0
ENSG00000091317_CMTM6	3369	1808	1015	1291	1750	1058	1475	940	1724	1206	2663	1846	2489	3925	1880	1263	2929	2760	1427	2122	1564	2435	1104	2143	1249	2146	1993	2310	2739	1829	1768	2513	3425	2802	2919	2748	4457	1481	3143	2898	2770	1190	1464	2335	3166	3473	474	1824	2528
ENSG00000091409_ITGA6	6978	1069	2139	1474	2886	2203	1687	1904	5502	2753	4970	2788	2365	7172	2637	3374	4466	5259	1249	2239	2817	4842	1534	2704	1616	3419	1802	2386	4698	3103	3095	3180	7029	2954	5219	3092	4391	6139	4191	896	6427	2918	3129	5408	3865	5071	1532	3544	4455
ENSG00000091428_RAPGEF4	0	0	0	65	12	1	0	2	6	0	24	21	5	1	0	0	0	18	0	0	2	0	0	26	3	1	0	9	14	10	22	4	4	11	6	12	12	4	4	0	9	9	0	1	0	12	0	17	0
ENSG00000091436_MLTK	8	0	0	52	51	12	83	0	7	16	34	6	9	10	6	64	5	0	1	0	4	18	13	20	0	45	135	53	23	62	34	24	19	11	3	42	10	12	0	0	3	5	23	0	7	21	13	2	6
ENSG00000091482_SMPX	0	0	0	0	0	0	0	0	0	0	0	0	0	0	0	0	0	0	0	0	0	0	0	0	0	0	0	0	0	0	0	0	0	0	0	0	0	0	0	0	0	0	0	0	0	0	0	0	0
ENSG00000091483_FH	22	20	68	36	10	16	24	4	90	22	100	21	6	10	66	12	27	27	0	2	19	18	0	99	9	315	225	47	61	101	150	255	52	31	6	33	41	62	3	11	33	8	45	17	19	71	15	6	8
ENSG00000091490_SEL1L3	2058	350	1095	986	1039	86	1353	1363	4413	2688	6130	1698	1931	2261	1213	1060	1788	1541	518	198	3417	716	892	606	704	1041	1805	1883	2106	1585	1516	851	3311	1587	991	1710	996	1380	2273	860	630	923	2767	2472	2317	2525	1190	3461	839
ENSG00000091513_TF	0	0	0	0	8	1	0	0	9	0	9	13	0	1	0	0	25	0	0	0	3	0	0	9	25	47	16	6	10	4	19	5	0	4	0	0	0	1	14	0	12	0	4	6	0	0	0	9	0
ENSG00000091527_CDV3	471	374	187	291	427	340	214	379	580	266	632	354	323	472	311	397	453	271	258	392	330	402	284	682	266	890	856	500	499	569	478	645	469	330	444	507	340	381	441	403	426	381	401	408	414	412	132	461	454
ENSG00000091536_MYO15A	0	0	0	0	0	18	0	12	1	0	0	0	0	0	0	0	0	0	0	0	0	0	0	2	0	18	6	0	0	2	5	0	1	0	0	0	0	0	0	0	0	0	0	0	0	0	1	0	0
ENSG00000091542_ALKBH5	476	246	152	50	513	82	177	287	531	339	778	308	263	403	401	277	398	332	283	241	285	493	136	387	147	587	497	347	538	581	425	486	540	420	330	478	505	322	578	347	266	492	407	435	619	300	136	412	371
ENSG00000091583_APOH	0	0	0	0	0	0	0	0	0	0	0	0	0	0	0	0	0	0	0	0	0	0	0	0	0	0	0	2	0	0	0	0	0	0	0	0	0	0	0	0	0	0	0	0	0	0	0	0	0
ENSG00000091592_NLRP1	34	90	476	215	57	46	24	17	600	23	296	4	3	7	221	564	26	9	146	8	94	15	0	712	30	4565	5241	1074	530	821	1036	2211	503	9	16	83	8	288	22	4	50	20	157	41	90	258	44	9	30
ENSG00000091622_PITPNM3	0	0	1	0	0	3	0	0	0	8	0	0	0	0	0	4	1	0	0	0	0	0	0	2	0	12	7	0	0	4	0	5	0	0	2	0	0	2	0	0	0	0	0	0	0	0	0	0	2
ENSG00000091640_SPAG7	75	59	13	16	41	109	48	98	147	3	46	5	35	42	15	8	39	28	0	34	25	85	13	72	31	372	194	82	67	111	132	203	87	12	47	14	84	18	4	19	56	3	80	15	32	15	38	13	39
ENSG00000091651_ORC6	7	53	1	0	0	6	6	0	20	0	14	20	0	0	1	6	0	16	0	0	10	10	0	0	1	59	31	3	13	10	0	10	3	6	12	0	0	0	0	19	3	0	15	0	1	1	1	9	0
ENSG00000091656_ZFHX4	0	0	1	0	0	28	0	6	1	0	0	0	0	0	0	0	0	0	0	0	0	4	0	0	0	0	0	0	0	0	1	0	0	0	0	0	0	0	0	0	0	0	0	0	0	1	8	0	0
ENSG00000091664_SLC17A6	0	0	0	0	0	0	0	0	0	0	0	0	0	0	0	0	0	0	0	0	0	0	0	0	0	0	0	0	0	0	0	0	0	0	0	0	0	0	0	0	0	0	2	0	0	0	0	0	0
ENSG00000091704_CPA1	0	0	0	0	0	4	18	1	5	0	0	0	0	0	0	0	0	0	0	0	0	0	0	0	0	0	0	0	0	0	0	0	0	0	0	0	0	0	0	0	0	0	0	0	0	0	0	0	0
ENSG00000091732_ZC3HC1	28	20	36	39	69	7	98	21	57	29	62	21	43	37	61	49	70	50	0	7	44	22	29	89	7	174	63	42	40	53	91	102	58	51	66	46	38	46	30	13	40	91	97	26	59	37	28	56	61
ENSG00000091831_ESR1	0	0	1	0	0	1	0	0	0	0	0	0	0	0	0	1	0	0	0	0	0	0	0	3	0	6	2	0	0	0	3	1	0	0	0	0	8	0	0	0	0	0	0	0	0	0	14	0	0
ENSG00000091844_RGS17	3	22	0	22	0	9	14	0	9	121	0	23	16	154	2	0	4	9	23	1	21	8	49	9	0	35	1	27	40	4	8	35	18	87	26	11	0	2	7	20	10	25	13	5	1	12	7	30	26
ENSG00000091879_ANGPT2	0	0	2	1	0	0	0	0	5	0	3	0	0	4	10	9	0	0	0	0	0	0	0	0	0	14	4	1	1	3	0	23	3	0	0	0	0	0	0	1	1	0	3	0	0	0	0	0	0
ENSG00000091947_TMEM101	5	10	2	7	8	3	0	4	6	0	0	0	0	0	0	0	0	0	0	0	1	5	17	9	2	42	29	9	3	8	31	29	10	0	0	0	0	6	1	0	0	0	1	5	0	6	0	0	0
ENSG00000091972_CD200	0	0	0	0	0	1	0	1	15	7	12	19	0	3	0	0	17	0	0	0	1	3	0	4	0	7	18	7	12	2	0	3	1	1	7	1	1	2	5	0	2	0	0	1	2	0	0	5	11
ENSG00000091986_CCDC80	17	48	2	2	56	267	125	61	11	69	17	28	31	9	21	50	15	30	16	6	34	25	10	16	0	15	12	18	47	28	17	25	76	16	19	15	27	6	50	40	22	21	57	27	28	48	9	28	60
ENSG00000092009_CMA1	4	3	0	6	11	1	0	0	20	0	7	7	0	4	0	12	11	2	0	0	13	0	0	3	0	0	1	4	8	5	21	2	17	31	0	0	13	0	10	8	4	0	0	9	13	10	11	8	4
ENSG00000092010_PSME1	547	1172	869	998	792	394	649	579	1658	405	1713	348	333	437	428	891	622	608	1045	762	684	565	1021	1361	210	4278	3076	1261	775	1261	2119	2791	1055	470	416	494	1229	623	638	332	629	580	907	632	860	560	389	564	572
ENSG00000092020_PPP2R3C	705	667	434	201	910	352	523	283	973	731	519	393	313	501	346	510	774	664	490	659	360	564	335	678	254	939	1084	546	605	619	518	762	757	680	1019	723	880	624	588	517	726	604	552	584	754	837	417	715	798
ENSG00000092036_HAUS4	12	21	1	24	8	11	13	20	46	19	63	3	30	17	9	21	15	40	26	13	29	22	40	58	0	217	390	122	42	74	33	70	45	42	6	38	21	14	15	0	24	0	18	22	52	24	1	19	15
ENSG00000092051_JPH4	0	0	0	0	0	4	0	4	8	0	0	4	0	0	0	0	0	0	0	0	0	0	0	0	0	0	4	0	0	1	6	1	2	0	0	0	0	0	4	0	0	0	0	4	0	0	0	1	11
ENSG00000092054_MYH7	0	0	0	0	0	110	0	62	0	33	67	0	0	0	0	25	5	0	0	0	0	0	0	0	0	0	0	0	0	1	0	0	0	0	14	0	4	13	0	0	23	0	1	18	0	0	0	6	0
ENSG00000092067_CEBPE	0	1	45	0	0	1	0	0	0	0	0	0	0	0	0	24	0	4	0	0	0	0	0	37	0	12	50	2	3	9	0	4	0	0	0	0	0	0	0	0	0	0	0	0	0	0	0	0	0
ENSG00000092068_SLC7A8	0	10	0	32	9	0	0	13	0	0	0	2	0	8	0	7	13	15	0	12	6	2	1	10	0	10	0	9	2	7	3	0	30	3	0	0	1	15	3	0	5	0	2	7	17	14	2	2	3
ENSG00000092094_OSGEP	286	269	55	90	121	23	38	92	215	26	262	129	74	113	119	152	172	130	59	45	134	231	101	197	0	589	399	231	227	222	239	276	284	71	100	128	217	94	227	84	198	132	128	183	246	196	35	93	156
ENSG00000092096_SLC22A17	77	11	27	10	197	59	19	136	185	69	194	58	31	96	81	88	101	92	40	133	74	83	18	55	42	30	49	94	97	146	91	45	147	76	114	79	97	107	144	57	56	39	125	97	108	57	77	111	130
ENSG00000092098_RNF31	75	8	72	107	19	33	0	82	176	6	181	12	16	7	66	113	34	28	37	0	45	42	86	202	21	981	707	216	91	232	344	561	142	22	22	21	85	54	26	27	73	73	81	26	42	49	72	32	41
ENSG00000092108_SCFD1	1313	1329	1603	774	956	1535	580	480	1653	1178	1088	1054	860	1840	921	1216	1847	1380	769	1201	1367	1056	789	1345	563	1693	1587	1308	1250	1236	1209	2030	1372	2116	1689	1915	1457	2560	1481	765	1278	1092	1405	1397	1668	1987	940	1688	1417
ENSG00000092140_G2E3	340	210	29	220	130	97	121	61	241	175	251	162	346	291	223	188	207	256	22	66	157	196	69	280	114	525	332	189	162	281	290	367	202	340	363	224	470	251	186	107	247	131	345	160	136	429	36	178	125
ENSG00000092148_HECTD1	1634	863	676	522	1164	400	704	568	1993	1126	2490	1156	791	1244	1414	1467	1797	948	460	533	1272	1381	503	1849	660	4382	3390	1799	2045	2306	2601	3965	1954	1381	1450	1661	1654	1221	1484	416	1241	761	1710	1398	1664	1485	503	1446	1401
ENSG00000092199_HNRNPC	7980	8395	9355	6249	6209	5586	6925	4712	10314	7013	9337	7742	6278	7977	6387	6724	8957	7773	5407	8807	7033	7580	4516	8224	3582	10556	11642	9663	9027	9621	8558	12441	9173	8658	10060	9119	10066	9936	11014	6619	6401	8695	9356	7717	10531	8616	3831	8219	7712
ENSG00000092200_RPGRIP1	0	0	0	26	0	1	0	1	0	0	0	0	0	0	3	29	9	0	4	0	0	0	0	19	0	23	175	51	5	17	0	1	3	0	5	2	0	3	0	0	0	0	1	3	0	0	1	0	0
ENSG00000092201_SUPT16H	251	110	417	66	169	229	89	133	577	163	556	199	57	150	277	253	270	136	115	110	169	262	153	517	54	2128	1290	336	369	541	814	1672	332	187	248	162	160	271	149	57	216	235	352	168	367	337	186	149	205
ENSG00000092203_TOX4	894	343	870	507	664	437	254	334	715	561	1083	600	751	533	625	369	897	579	402	654	512	570	568	1073	403	1496	1310	898	717	725	816	895	738	595	948	711	767	652	874	750	545	929	760	659	611	684	370	649	717
ENSG00000092208_GEMIN2	0	0	0	31	9	65	0	0	42	11	13	9	0	13	66	0	4	13	0	19	4	31	21	25	0	97	43	21	39	26	20	58	22	12	27	19	23	31	22	0	23	52	13	3	8	30	0	13	2
ENSG00000092295_TGM1	0	0	0	1	0	1	0	1	0	0	8	12	0	0	0	0	0	0	0	0	0	0	0	0	0	33	26	0	7	4	4	19	1	0	0	0	0	0	0	0	0	0	0	0	0	1	0	0	0
ENSG00000092330_TINF2	1652	378	1213	663	1451	414	678	369	1907	808	1870	783	692	1197	990	1148	1179	815	398	702	578	1150	492	1522	650	4007	2950	1540	999	1376	1804	2903	1300	805	1179	1231	1776	977	1180	839	1022	848	1408	965	1295	1060	637	893	1366
ENSG00000092345_DAZL	0	0	0	0	0	0	0	0	3	0	0	0	0	0	0	0	0	8	0	0	0	0	0	0	0	0	0	0	0	0	0	0	2	0	0	0	0	0	0	0	0	0	0	0	0	0	0	5	0
ENSG00000092377_TBL1Y	0	0	0	0	0	1	0	0	0	0	0	0	0	0	25	0	0	0	0	0	0	4	0	0	0	0	0	3	0	1	0	0	6	0	0	0	0	0	35	0	0	0	54	0	0	0	0	62	0
ENSG00000092421_SEMA6A	2	15	1	1	5	9	1	4	21	7	29	11	0	1	8	2	0	0	0	0	2	3	12	8	4	48	47	8	3	12	8	28	10	3	0	3	4	1	0	1	0	9	0	0	15	0	0	13	0
ENSG00000092439_TRPM7	1181	900	479	449	831	413	649	657	2097	1220	1308	1102	751	1414	1340	1117	1375	1288	445	688	1402	1315	497	1729	430	2957	2077	1574	1718	1500	1759	2820	1617	1843	2220	1750	1646	2373	1423	477	1195	940	1476	1331	1577	2074	806	1616	1548
ENSG00000092445_TYRO3	0	0	0	0	0	15	0	1	3	0	0	0	0	0	3	0	0	0	0	0	0	1	0	0	0	3	0	3	2	0	0	9	1	0	0	0	0	0	0	0	0	0	0	0	0	0	0	1	0
ENSG00000092470_WDR76	34	14	15	36	30	41	0	1	42	33	63	23	23	35	10	9	24	16	0	39	23	11	0	62	1	234	128	20	26	60	109	168	36	18	56	40	31	64	32	40	35	9	58	11	16	27	12	11	61
ENSG00000092529_CAPN3	0	18	0	117	0	1	2	0	21	0	43	0	48	41	1	240	0	8	0	0	8	0	0	98	0	267	386	97	70	76	85	63	41	0	7	8	0	64	2	0	0	0	16	2	0	42	18	11	0
ENSG00000092531_SNAP23	23319	27585	17634	17129	18892	14932	24571	8465	22966	15991	24670	15792	22992	24349	17113	12958	24235	22758	14217	18050	19758	24607	14664	14646	11101	13081	11629	18264	24880	18609	13840	16150	23048	26278	24912	20980	19616	20576	27457	15723	22116	24199	17440	23482	22591	22766	10717	20107	18695
ENSG00000092607_TBX15	0	0	0	0	0	74	0	2	0	0	0	0	0	0	0	0	0	0	0	0	0	5	0	0	0	0	0	0	0	0	0	0	0	0	0	0	0	0	0	0	0	0	0	0	0	0	0	0	0
ENSG00000092621_PHGDH	262	330	111	426	256	565	858	2066	533	224	281	283	284	826	249	581	1766	321	1266	41	778	835	429	370	450	156	337	203	671	431	252	450	574	821	1013	438	390	173	484	160	977	508	333	544	423	1038	183	510	295
ENSG00000092758_COL9A3	0	0	0	40	0	1	0	1	1	0	0	0	0	0	0	25	0	0	6	0	1	0	9	17	0	16	120	70	3	18	0	4	3	2	0	0	8	0	1	4	0	9	0	0	0	0	0	0	0
ENSG00000092820_EZR	47	50	132	191	47	141	23	4	358	44	384	33	34	29	115	177	6	7	141	50	29	30	47	347	90	2057	1020	257	249	432	682	1247	178	25	4	56	67	187	7	18	73	2	151	14	46	123	122	13	21
[truncated: 55,821 more rows]
[truncated: 47 more columns]
