# Supplementary material for: RNA Sequencing of Tumor-Educated Platelets Reveals a Three-Gene Diagnostic Signature in Esophageal Squamous Cell Carcinoma
Source: Front Oncol. 2022 May 9;12:824354. doi: 10.3389/fonc.2022.824354 (PMC9124963; doi:10.3389/fonc.2022.824354)
Supplement: Supplementary file 7 [file DataSheet_7.xlsx]

## Sheet: Sheet1
Label	Gender	Age	Smoking	Family	Stage	Size	Location	Differentiation	PLT	Cohort	State
VE1	1	46	0	0	3b	6.5	1		243	Validation	ESCC
TE2	1	73	500	0	1b	0	1	3	206	Train	ESCC
TE3	1	56	600	1	2b	2.5	2	1	249	Train	ESCC
VE4	2	71	0	1	1c	2	1	3	184	Validation	ESCC
VE5	1	65	24	0	2b	2	1	2	216	Validation	ESCC
VE6	1	56	600	1	1a	3.3	2		211	Validation	ESCC
VE7	1	76	1	1	1b	1.9	1		204	Validation	ESCC
VE8	1	70	1	0	2b	5	1	2	225	Validation	ESCC
VE9	1	68	1	0	2b	4	1	3	319	Validation	ESCC
VE10	1	71	800	0	3b	4	1	2	242	Validation	ESCC
VE11	1	58	1200	0	1b	0.7	1	3	304	Validation	ESCC
VE12	1	49	0	1	3b	4.8	1	3	177	Validation	ESCC
VE13	2	53	400	0	1b	3	1	2	123	Validation	ESCC
VE14	1	54	600	1	3b	4.5	1	3	304	Validation	ESCC
TE15	1	55	0	1	3b	4	2	2	270	Train	ESCC
TE16	1	75	0	0	2b	3.5	1	4	285	Train	ESCC
VE17	1	60	0	0	2b	4	2	4	187	Validation	ESCC
VE18	1	57	1200	0	3b	3.5	1	4	274	Validation	ESCC
TE19	1	66	500	0	2b	3	1	4	353	Train	ESCC
TE20	1	78	800	0	1b	1.3	2	3	143	Train	ESCC
VE21	1	69	0	0	2b	8.5	1	3	272	Validation	ESCC
VE22	1	70	1	0	3b	4.5	2	3	170	Validation	ESCC
VE23	2	75	0	1	2b	6	1	4	236	Validation	ESCC
VE24	1	53	600	0	2b	3	1	3	246	Validation	ESCC
VE25	1	66	0	0	3b	0	1		237	Validation	ESCC
VE26	1	80	0	0	3b	4.5	2	3	197	Validation	ESCC
TE27	1	64	600	1	3b	4.5	2	3	212	Train	ESCC
VE28	1	58	40	0	2b	3.5	2	3	213	Validation	ESCC
TE29	2	45	0	1	2a	2.5	2		283	Train	ESCC
VE30	1	77	0	1	2b	4	2	3	180	Validation	ESCC
VE31	1	49	600	0	2b	2.5	1	3	212	Validation	ESCC
VE32	1	70	1200	0	3b	6	1	4	229	Validation	ESCC
VE33	1	44	200	1	2a	1.8	2	1	217	Validation	ESCC
VE34	1	65	450	1	3a	2.5	1	1	147	Validation	ESCC
TE35	1	56	300	1	2b	4.5	1	3	184	Train	ESCC
VE36	2	69	0	0	2b	5	1	1	247	Validation	ESCC
TE37	1	69	800	0	3b	4	2	3	213	Train	ESCC
TE38	1	66	0	0	2b	3	1	2	123	Train	ESCC
VE39	1	49	160	0	2b	5.5	1	5	216	Validation	ESCC
TE40	1	56	900	0	3b	3.5	2	5	168	Train	ESCC
VE41	2	68	0	1	1b	4	2	2	198	Validation	ESCC
VE42	1	63	800	1	1c	2.5	1	3	262	Validation	ESCC
TE43	1	65	0	0	3b		1		256	Train	ESCC
VE44	1	60	800	0	3b	4.5	2	1	156	Validation	ESCC
VE45	1	60	0	0	3b	2.5	2	4	229	Validation	ESCC
VE46	1	49	0	1	1b	4	1	3	203	Validation	ESCC
VE47	1	61	800	1	1b	1.8	1	5	188	Validation	ESCC
VE48	1	61	300	1	1c	3.5	1	3	189	Validation	ESCC
TE49	1	67	800	0	1a	2	1	5	243	Train	ESCC
TE50	1	58	800	1	3b	2.5	2	3	250	Train	ESCC
VE51	1	46	300	0	2b	3.6	2	3	236	Validation	ESCC
TE52	1	63	600	1	3b	6	2	3	225	Train	ESCC
VE53	1	58	600	0	1c	1.2	1	2	241	Validation	ESCC
VE54	1	69	0	0	3b	6	2	3	195	Validation	ESCC
TE55	2	75	0	0	1b	2.2	1	3	217	Train	ESCC
VE56	1	60	800	0	3b	6.5	1	2	163	Validation	ESCC
TE57	1	55	0	1	3a	0	1		178	Train	ESCC
VE58	1	64	450	1	3b	4.5	2	3	171	Validation	ESCC
VE59	1	55	0	0	1b	2.5	1	3	267	Validation	ESCC
TE60	1	47	0	0	3b	4	1	4	267	Train	ESCC
VE61	1	59	800	1	1b	2	2	3	213	Validation	ESCC
TE62	1	54	0	0	3b	4	1	3	257	Train	ESCC
VE63	1	65	0	0	3b	6	2	1	216	Validation	ESCC
VE64	1	69	0	0	2b	6	1	1	214	Validation	ESCC
VE65	1	68	0	0	3a	4	2	3	215	Validation	ESCC
VE66	1	67	2000	0	2b	4	2	5	179	Validation	ESCC
TE67	1	70	800	1	1c	3.6	2	5	186	Train	ESCC
VE68	1	68	0	0	1b	2.5	2	5	252	Validation	ESCC
TE69	1	56	400	0	1b	0	1		324	Train	ESCC
TE70	2	64	0	0	1a	3	1	5	193	Train	ESCC
VE71	1	64	600	0	3b	2.5	1	4	159	Validation	ESCC
VIC72	2	55	0	NA	NA	NA	NA	NA	141	Validation	Control
VIC73	2	52	1	NA	NA	NA	NA	NA	132	Validation	Control
VIC74	1	55	0	NA	NA	NA	NA	NA	189	Validation	Control
TIC75	2	63	1	NA	NA	NA	NA	NA	160	Train	Control
TIC76	1	45	0	NA	NA	NA	NA	NA	171	Train	Control
VIC77	1	78	1	NA	NA	NA	NA	NA	165	Validation	Control
VIC78	1	71	?	NA	NA	NA	NA	NA	244	Validation	Control
VIC79	1	63	1	NA	NA	NA	NA	NA	124	Validation	Control
VIC80	1	55	0	NA	NA	NA	NA	NA	145	Validation	Control
TIC81	1	63	0	NA	NA	NA	NA	NA	210	Train	Control
VIC82	1	60	0	NA	NA	NA	NA	NA	146	Validation	Control
TIC83	1	56	0	NA	NA	NA	NA	NA	169	Train	Control
VIC84	1	55	1	NA	NA	NA	NA	NA	151	Validation	Control
VIC85	1	54	0	NA	NA	NA	NA	NA	191	Validation	Control
VIC86	1	49	0	NA	NA	NA	NA	NA	201	Validation	Control
VIC87	1	48	1	NA	NA	NA	NA	NA	147	Validation	Control
VIC88	2	69	0	NA	NA	NA	NA	NA	168	Validation	Control
VIC89	1	68	0	NA	NA	NA	NA	NA	167	Validation	Control
TIC90	1	52	1	NA	NA	NA	NA	NA	161	Train	Control
VIC91	1	53	0	NA	NA	NA	NA	NA	159	Validation	Control
TIC92	1	52	0	NA	NA	NA	NA	NA	155	Train	Control
VIC93	1	57	1	NA	NA	NA	NA	NA	184	Validation	Control
TIC94	1	64	1	NA	NA	NA	NA	NA	131	Train	Control
VIC95	1	64	0	NA	NA	NA	NA	NA	131	Validation	Control
TIC96	1	70	0	NA	NA	NA	NA	NA	155	Train	Control
