# Supplementary material for: RNA Sequencing of Tumor-Educated Platelets Reveals a Three-Gene Diagnostic Signature in Esophageal Squamous Cell Carcinoma
Source: Front Oncol. 2022 May 9;12:824354. doi: 10.3389/fonc.2022.824354 (PMC9124963; doi:10.3389/fonc.2022.824354)
Supplement: Supplementary file 8 [file DataSheet_8.xlsx]

## Sheet: Sheet1
	Label	ct-GAPDH	ct-ARID1A	ct-GTF2H2	ct-PRKRIR	ARID1A.pcr	ARID1A.seq	GTF2H2.pcr	GTF2H2.seq	PRKRIR.pcr	PRKRIR.seq
Q1	VE1	24.16	34.24	29.87	35.34	-1.54	-2.13	0	-2.18561	-3.32	-2.02144
Q2	TE2	24.1	26.78	29.21	32.51	0.06	0.06	0.24	0.898987	-1.48	-0.661277
Q3	TE3	34.35	37	44.95	42.99	0.07	-3.02	-2.02	-1.77044	-1.63	-1.51432
Q4	VE4	24.21	28.41	19.27	32.39	-0.27	-1.35	4.38	4.73124	-1.32	-1.84991
Q5	VE5	31.76	37	26.83	37.28	-0.49	0.94	4.38	4.2231	0.45	0.398868
Q6	VE6	22.59	28.33	27.97	29.21	-0.6	0.09	0.13	-0.52892	-0.28	0.834045
Q7	VE7	21.88	22.54	27.37	29.55	0.5	0.33	0.09	-1.7578	-0.98	-0.778017
Q8	VE8	24.05	24.09	27.68	31.67	0.64	0.32	0.85	-0.0542387	-0.95	-2.32695
Q9	VE9	22.65	22.22	30.97	28.56	0.74	0.14	-1.08	-1.56967	0.19	-0.755189
Q10	VE10	24.05	30.91	30.22	31.98	-0.84	-2.24	-0.19	-0.124187	-1.15	-2.84637
Q11	VE11	25.48	29.72	31.09	34.91	-0.28	-1.63	0.04	0.937283	-2.16	-2.44233
Q12	VE12	23.34	26.48	30.52	30.62	-0.04	-0.12	-0.61	-1.2361	-0.72	-1.02689
Q13	VE13	24.09	23.47	29.39	30.94	0.78	-0.54	0.16	0.277696	-0.43	-2.2256
Q14	VE14	24.32	25.21	28.46	29.71	0.45	-0.57	0.64	0.555639	0.54	0.412982
Q15	TE15	24.91	26.46	30.04	29.89	0.31	0.3	0.23	0.11165	0.81	1.43511
Q16	TE16	22.09	22.66	27.53	27.76	0.52	0.43	0.1	-1.13045	0.35	-0.238682
Q17	VE17	23.06	24.92	27.31	28.41	0.24	-0.34	0.6	0.0154708	0.57	0.0878165
Q18	VE18	24.07	28.22	29.51	31.41	-0.26	-1.49	0.11	0.0192165	-0.76	-0.864254
Q19	TE19	23.26	23.88	28	30.01	0.51	-0.81	0.39	0.542455	-0.37	0.325354
Q20	TE20	25.16	29.65	35.06	34.95	-0.33	-1.88	-1.73	-2.15859	-2.39	-3.32495
Q21	VE21	23.55	25.73	29.47	30.31	0.17	-0.58	-0.09	1.23583	-0.37	0.521683
Q22	VE22	23	25.26	27.59	28.47	0.15	-0.3	0.46	1.59294	0.49	1.4396
Q23	VE23	24.06	29.04	32.05	33.53	-0.44	-2	-0.94	0.0487592	-2.18	-1.78684
Q24	VE24	22.85	24.27	26.65	30.29	0.34	0.02	0.78	0.656759	-0.83	0.743885
Q25	VE25	26.86	27.9	21.92	32.58	0.42	-0.41	4.38	3.33596	0.32	-0.169848
Q31	VE31	27.5	27.21	33.95	32.98	0.71	1.35	-0.31	-1.12111	0.48	0.362275
Q32	VE32	22.9	22.13	28.79	28.81	0.81	0.24	-0.08	-1.20333	0.19	1.42171
Q33	VE33	35.06	34.65	38.16	39.64	0.73	1.25	1.07	1.86911	1.08	0.502398
Q34	VE34	22.5	18.52	27.34	28.07	1.51	0.52	0.35	1.8341	0.42	-0.347659
Q35	TE35	23.63	17.86	28.82	30.5	1.9	0.76	0.21	0.997948	-0.45	-0.651944
Q36	VE36	28.46	22.8	31.24	31.32	1.87	1.82	1.2	0.925134	2.23	2.52986
Q37	TE37	23.87	20.12	25.3	29.55	1.46	1.31	1.76	2.88996	0.35	-0.614743
Q38	TE38	25.41	18.83	30.66	29.08	2.07	1.96	0.18	-0.451508	1.68	-0.140322
Q39	VE39	23.08	17.13	26.81	29.14	1.94	0.88	0.81	-1.15495	0.09	-1.81499
Q40	TE40	25.67	21.56	29.7	30.11	1.54	0.79	0.68	1.15125	1.17	3.36554
Q41	VE41	27.48	20.66	31.72	32.65	2.12	1.23	0.6	-0.165888	0.69	0.663256
Q42	VE42	25.7	19.94	29.38	30.24	1.9	1.19	0.83	0.626599	1.11	2.45036
Q43	TE43	25.56	19.91	32.09	30.34	1.87	0.73	-0.34	-0.0581459	0.95	0.448579
Q44	VE44	25.08	23.52	28.23	30.05	0.98	0.59	1.05	0.249575	0.82	0.155367
Q45	VE45	26.68	19.04	31.77	31.71	2.3	1.37	0.25	-1.54915	0.78	0.655222
Q46	VE46	25.96	30.8	30.97	32.03	-0.41	-0.2	0.28	1.1321	0.08	0.254885
Q47	VE47	25.35	18.86	30.33	28.53	2.05	1.15	0.29	1.47246	2.01	1.27706
Q48	VE48	24.03	20.6	37.16	28.63	1.39	1.06	-3.06	-0.734798	1.06	1.01247
Q49	TE49	29.27	24.64	31.96	33.72	1.65	1.21	1.24	0.33714	1.17	1.53994
Q50	TE50	21.46	30.35	34.5	27.35	-1.28	-0.33	-3.02	-3.30653	0.21	0.106303
Q51	VE51	19.79	25.05	25.05	25.71	-0.5	1.15	0.18	1.52489	0.18	-0.697722
Q52	TE52	19.25	24.26	24.63	25.42	-0.44	0.24	0.13	-0.704946	0.02	1.28092
Q53	VE53	19.28	25.02	25.61	24.04	-0.6	1.33	-0.26	0.714197	0.96	0.6622
Q54	VE54	19.06	23.63	24.76	23.56	-0.35	0.99	0	-0.286702	1.13	0.455096
Q55	TE55	18.56	24.52	22.75	24.47	-0.65	1.25	0.62	0.861883	0.19	-1.32649
Q56	VE56	18.8	23.76	24.37	23.43	-0.43	1.22	0.05	0.594211	1.05	0.958731
Q57	TE57	18.23	23.15	22.29	23.63	-0.42	0.31	0.67	1.83579	0.53	-0.726107
Q58	VE58	18.1	22.71	24.1	23.86	-0.36	0.67	-0.12	0.777569	0.29	0.600414
Q59	VE59	21.02	25.46	25.52	28.44	-0.32	1.07	0.49	0.922801	-0.82	-2.91837
Q60	TE60	19.81	24.24	22.83	25.13	-0.32	1.35	1.1	-0.0308872	0.59	0.912433
Q61	VE61	19.38	25.16	25.15	25.74	-0.61	0	-0.03	-0.73072	-0.1	0.126603
Q62	TE62	19.82	24.9	27.17	25.14	-0.46	0.53	-0.68	-2.52852	0.59	3.60582
Q63	VE63	23.02	29.6	37.33	30.34	-0.78	-0.01	-3.54	-2.94905	-0.75	-1.61329
Q64	VE64	22.81	28.67	26.35	29.77	-0.63	1.35	0.89	2.48947	-0.51	-2.13887
Q65	VE65	29.38	24.04	33.53	33.23	1.8	1.6	0.64	0.719627	1.56	2.26687
Q66	VE66	29.68	23.81	35.11	34.59	1.92	0.97	0.11	-0.265722	0.86	0.217634
Q67	TE67	28.99	24.21	34.19	34.68	1.68	0.11	0.21	2.38071	0.34	-1.63664
Q68	VE68	28.4	23.48	33.57	33.9	1.71	0.69	0.22	-0.301758	0.47	2.24703
Q69	TE69	20.58	24.6	24.07	27.32	-0.23	1.25	0.91	0.733063	-0.37	-1.11856
Q70	TE70	20.58	25.23	24.92	25.22	-0.36	0.7	0.56	-1.28412	1.04	2.65341
Q71	VE71	20.94	24.41	26.6	26.2	-0.11	1.5	0.02	1.58414	0.63	0.534178
Z4	TIC75	21.67	29.7	27.23	26.52	-1.1	0	0.05	-0.70652	0.9	0.484007
Z5	TIC76	22.08	26.59	26.94	26.29	-0.33	0.59	0.35	0.892273	1.33	1.86819
Z6	VIC77	29.4	30.96	32.45	34.92	0.31	-0.1	1.09	1.43415	0.45	0.454299
Z7	VIC78	24.51	29.82	27.4	28.04	-0.51	1.03	1.16	1.50114	1.78	2.76087
Z8	VIC79	23.65	27.52	28.13	29.32	-0.19	-0.15	0.5	0.841894	0.36	-0.133246
Z9	VIC80	24.13	28.56	27.08	29.07	-0.32	-0.86	1.13	0.944596	0.84	2.12248
Z10	TIC81	27.34	30.25	30.03	32.53	0.01	-0.21	1.24	0.513804	0.67	0.276571
Z11	VIC82	27.34	30.9	30.47	33.1	-0.13	-0.24	1.06	0.96075	0.3	-1.7643
Z12	TIC83	26.75	30.94	31.21	33	-0.26	-0.94	0.51	1.69536	-0.03	-1.22058
Z13	VIC84	27.12	28.29	31.71	31.29	0.39	0.02	0.45	1.52759	1.35	1.94917
Z14	VIC85	27.38	30.8	32.75	33.35	-0.1	-0.51	0.13	0.639171	0.15	0.234434
Z15	VIC86	25.86	28.44	30.95	33.57	0.09	-1.4	0.25	-0.691627	-1.01	-2.27193
Z16	VIC87	26.05	27.53	30.17	31.6	0.32	-0.51	0.65	1.34205	0.43	1.2466
Z17	VIC88	23.53	32.84	32.22	30.11	-1.37	-1.24	-1.23	-0.0435569	-0.26	0.970898
Z18	VIC89	23.85	32.87	26.46	29.93	-1.31	-0.04	1.27	0.0652756	0.08	-0.637098
Z19	TIC90	22.92	28.21	27.51	29.46	-0.5	-0.7	0.46	2.30947	-0.23	1.14174
Z20	VIC91	23.2	31.75	27.91	28.69	-1.21	-0.63	0.41	0.389664	0.47	-0.332675
Z21	TIC92	24.23	32.09	29.06	29.82	-1.06	-0.45	0.36	-0.898949	0.41	-0.422356
Z22	VIC93	23.83	29.93	27.55	29.71	-0.68	0.26	0.81	2.19198	0.21	0.274042
Z23	TIC94	23.86	26.83	24.45	27.84	0	1.07	2.1	2.10896	1.48	1.56667
Z24	VIC95	22.68	31.87	26.72	28.56	-1.35	0.3	0.69	1.27249	0.22	-0.123869
Z25	TIC96	23.51	29.7	28.46	28.97	-0.7	0.28	0.31	1.17849	0.5	1.60343
